# Supplementary material for: Dermal Blimp1 Acts Downstream of Epidermal TGFβ and Wnt/β-Catenin to Regulate Hair Follicle Formation and Growth
Source: PubMed Central journal article supplement (PMC5646946; doi:10.1016/j.jid.2017.06.015), 2017-11
Supplement: mmc1.pdf [file mmc1.pdf]

**Dermal Blimp1 acts downstream of epidermal TGF $\beta$  and Wnt/ $\beta$ -catenin to regulate hair  
follicle formation and growth**

Stephanie B. Telerman<sup>1,3</sup>, Emanuel Rognoni<sup>1,3</sup>, Inês Sequeira<sup>1</sup>, Angela Oliveira Pisco<sup>1</sup>, Beate M. Lichtenberger<sup>2</sup>, Oliver Culley<sup>1</sup>, Priyalakshmi Viswanathan<sup>1</sup>, Ryan R. Driskell<sup>1</sup> and Fiona M. Watt<sup>1\*</sup>

<sup>1</sup>King's College London Centre for Stem Cells and Regenerative Medicine, 28<sup>th</sup>Floor, Tower Wing, Guy's Hospital Campus, Great Maze Pond, London SE1 9RT

<sup>2</sup>Medical University of Vienna, Skin & Endothelium Research Division (SERD), Department of Dermatology, Vienna, Austria

<sup>3</sup>Equal contribution

\*Corresponding author: [fiona.watt@kcl.ac.uk](mailto:fiona.watt@kcl.ac.uk)

**SUPPLEMENTAL MATERIAL INVENTORY**

**Figure S1: Whisker growth upon Blimp1 deletion and DP FACS gating strategy**

**Figure S2: Loss of dermal Blimp1 induces a delay in hair growth during development and postnatal anagen induction**

**Figure S3: HF type quantification, guard hair analysis and P-Cadherin analysis of the HF bulb**

**Figure S4: TGF $\beta$  signalling induces Blimp1 expression in neonatal and adult dermal fibroblasts**

**Figure S5: Dermal Blimp1 loss attenuates Wnt/ $\beta$ -catenin signalling in the DP**

**Figure S6: Epidermal  $\beta$ -catenin overexpression induces Blimp1 expression during anagen and ectopic HF formation and overcomes hair growth defect in Blimp1(dKO) mice after depilation**

**Table S1: List of mice lines used in this study**

**Table S2: List of antibodies used in immunohistochemistry (IHC) and Flow cytometry (FC)**

**Table S3: List of growth factors used in this study**

**Table S4: Generation of pan-DP signature and panBlimp1 target genes**

**Table S5: Bioinformatic analysis of the intersection between the pan-DP signature and the pan-Blimp1 target genes**

# Figure S1

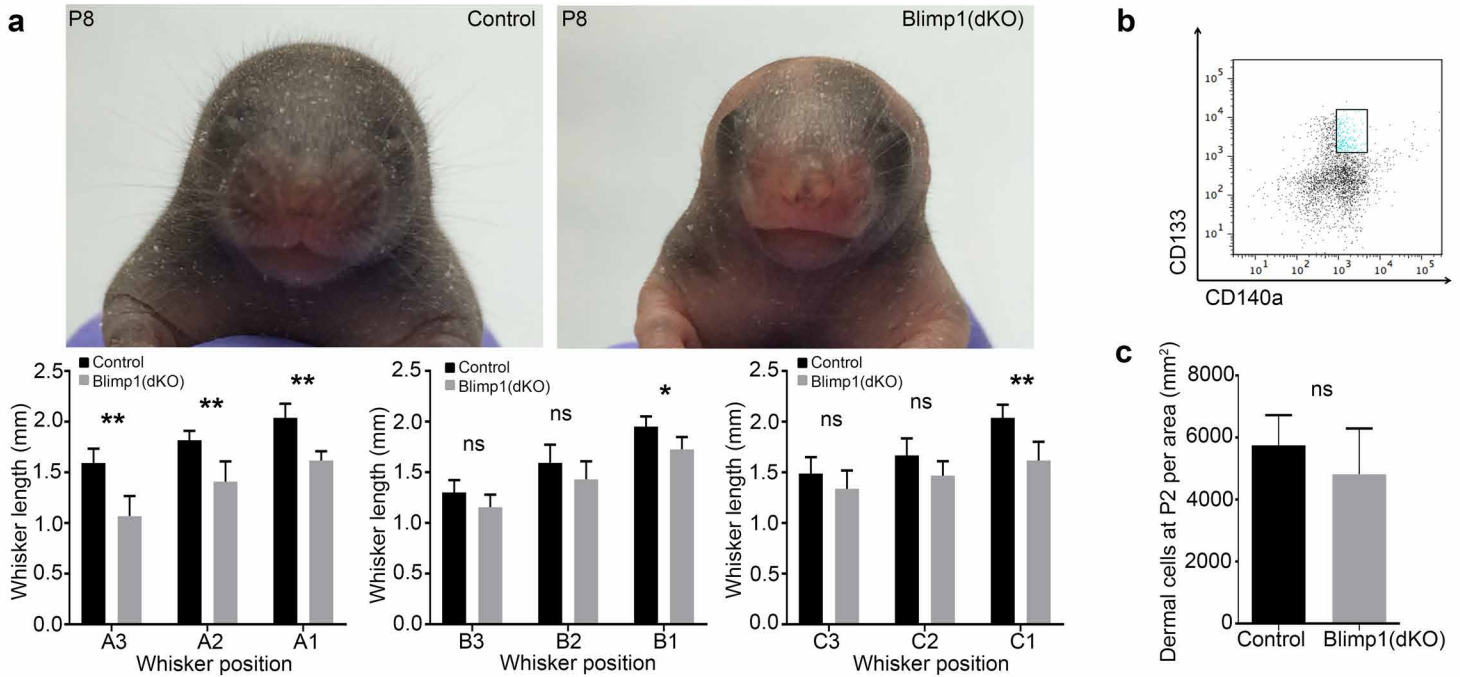

## Figure S1: Whisker growth upon Blimp1 deletion and DP FACS gating strategy

**(a)** Whisker growth analysis. Mouse pictures at indicated postnatal age, showing delayed whisker growth (upper panels) and quantification of whisker length of row A, B and C at P8 (n=3 biological replicates per genotype) (lower panels). **(b)** DP FACS gating strategy isolating CD133<sup>+</sup> and CD140a<sup>+</sup> cells. **(c)** Quantification of dermal cell density in P2 mice (n=4 sections per mouse; n=5 Control, 4 Blimp1(dKO) biological replicates). Data shown are means  $\pm$  s.d. ns, not significant, \*P<0.05, \*\*P<0.005.

# Figure S2

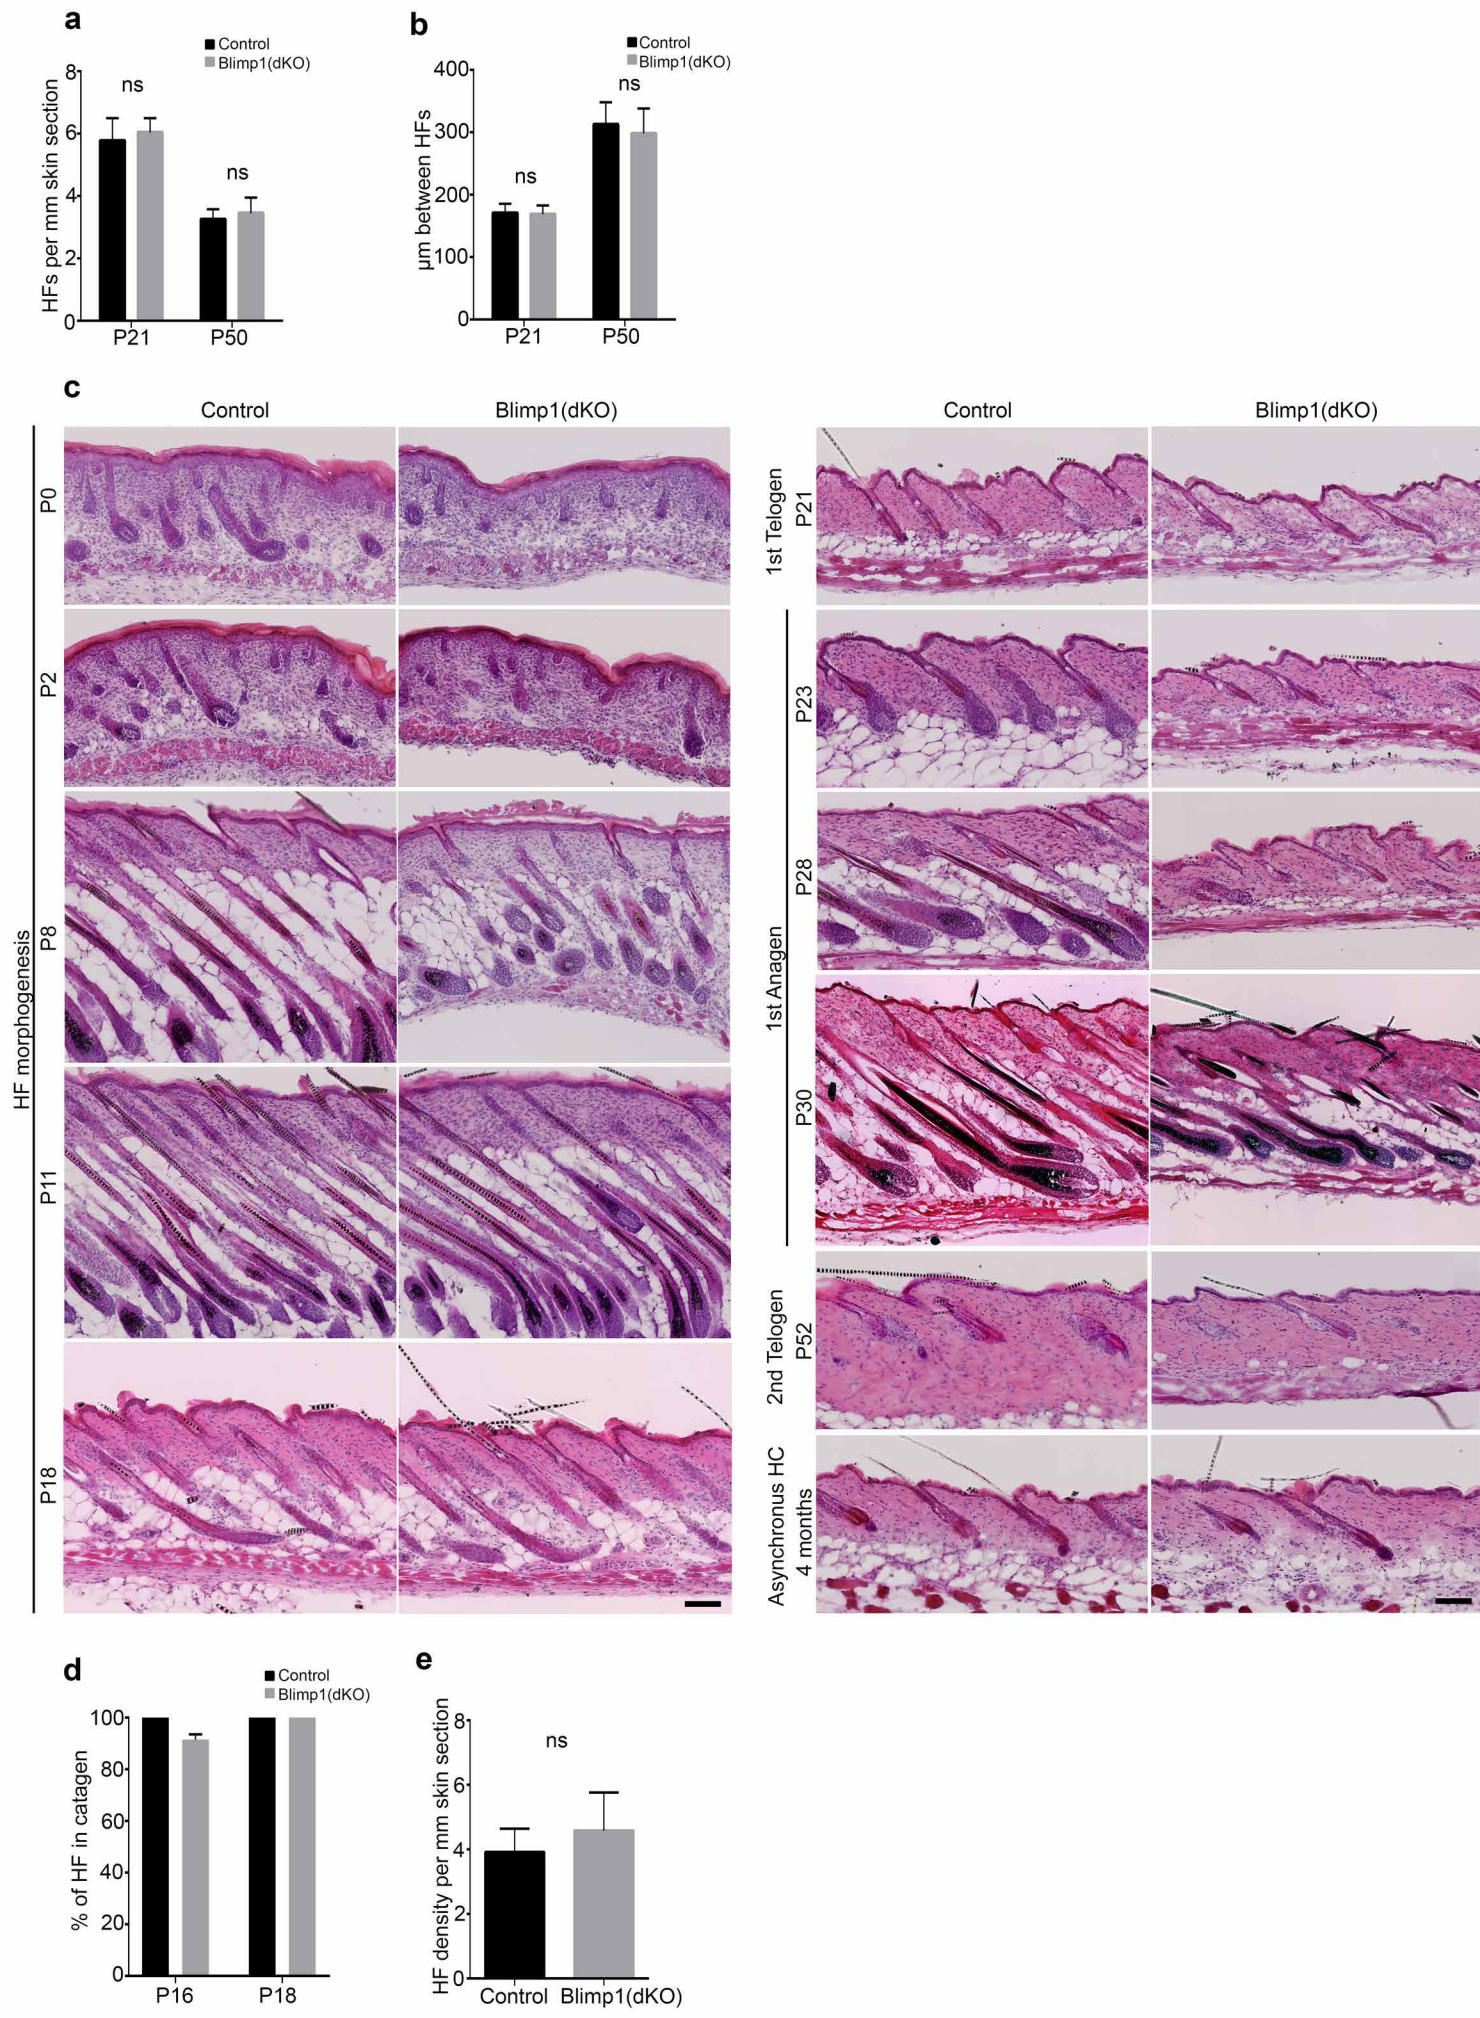

**Figure S2: Loss of dermal Blimp1 induces a delay in hair growth during development and postnatal anagen induction**

**(a,b)** Quantification of HF density **(a)** and HF spacing **(b)** at indicated time points (n=6 skin sections per mouse, n=3 biological replicates per genotype). **(c)** H&E-stained back skin section of indicated time points during hair morphogenesis (left panels) and hair cycle stage (right panels). **(d)** Quantification of HF in catagen (n= 3 Control, 2 Blimp1(dKO) at P16; 2 per genotype at P18). **(e)** Quantification of HF density at PD10 (n=4 whole mount sections per mouse; n=8 Control, 10 Blimp1(dKO) biological replicates). Data shown are means  $\pm$ s.d. ns, not significant, \*P<0.05, \*\*P<0.005. HC, hair cycle. Scale bars, 100 $\mu$ m.

# Figure S3

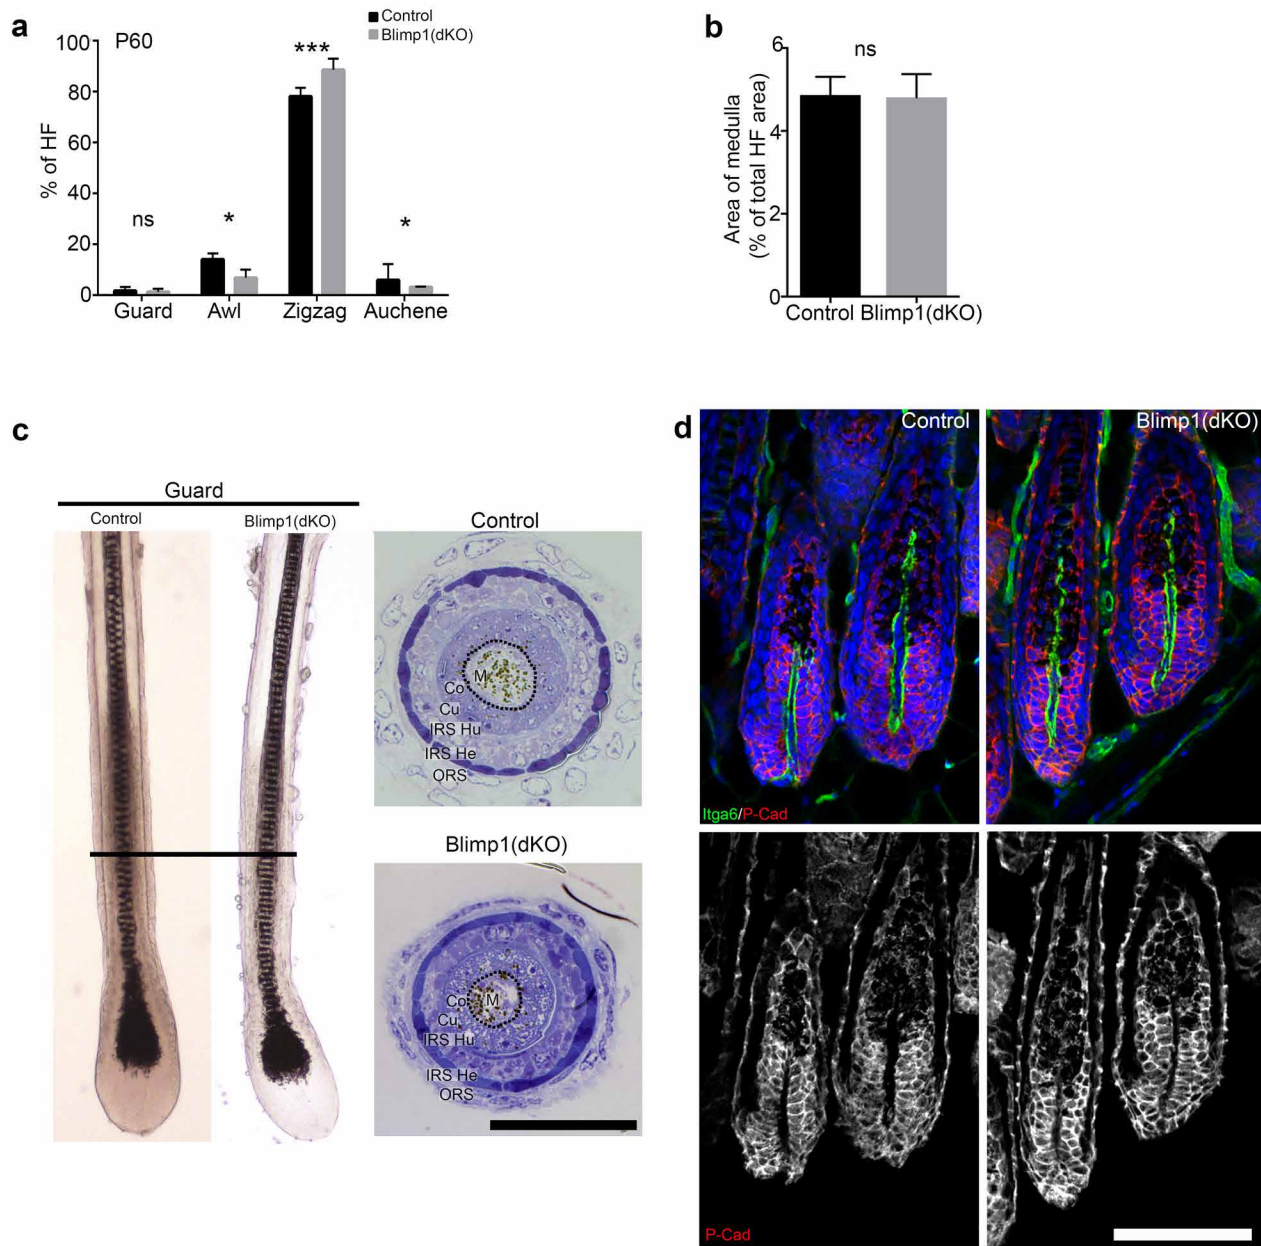

## Figure S3: HF type quantification, guard hair analysis and P-Cadherin analysis of the HF bulb

**(a)** Quantification of HF types in control and Blimp1(dKO) mice at P60 (n=200 HFs per mouse, n=3 biological replicates per genotype). **(b,c)** Guard hair analysis. Quantification of medulla cell area (n= 8 sections per genotype) **(b)**. Bright field image of microdissected guard HF (left panel) and HF transversal semi-thin section **(c)**. Black bar indicates region of HF cross section shown in right panel. **(d)** Immunostaining of control and Blimp1(dKO) back skin at P11 for Itga6 (green) and P-Cadherin (red). Nuclei were labelled with DAPI (blue). Data shown are means  $\pm$ s.d. ns, not significant, \* $P < 0.05$ , \*\*\* $P < 0.0005$ , Scale bars, 50  $\mu$ m **(c)**, 100 $\mu$ m **(d)**.

## Figure S4

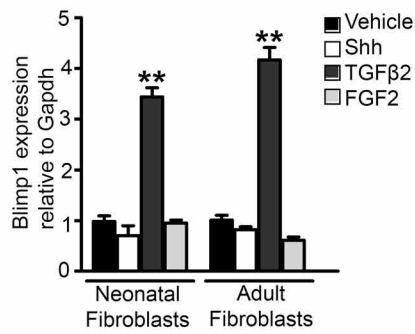

**Figure S4: TGFβ signalling induces Blimp1 expression in neonatal and adult dermal fibroblasts**  
qPCR analysis for Blimp1 expression in neonatal (P3) and adult dermal fibroblasts after 24 hours of treatment with indicated growth factor normalised to Gapdh (n=3 biological replicates). Data shown are means  $\pm$ s.e.m. \*\*P<0.005.

# Figure S5

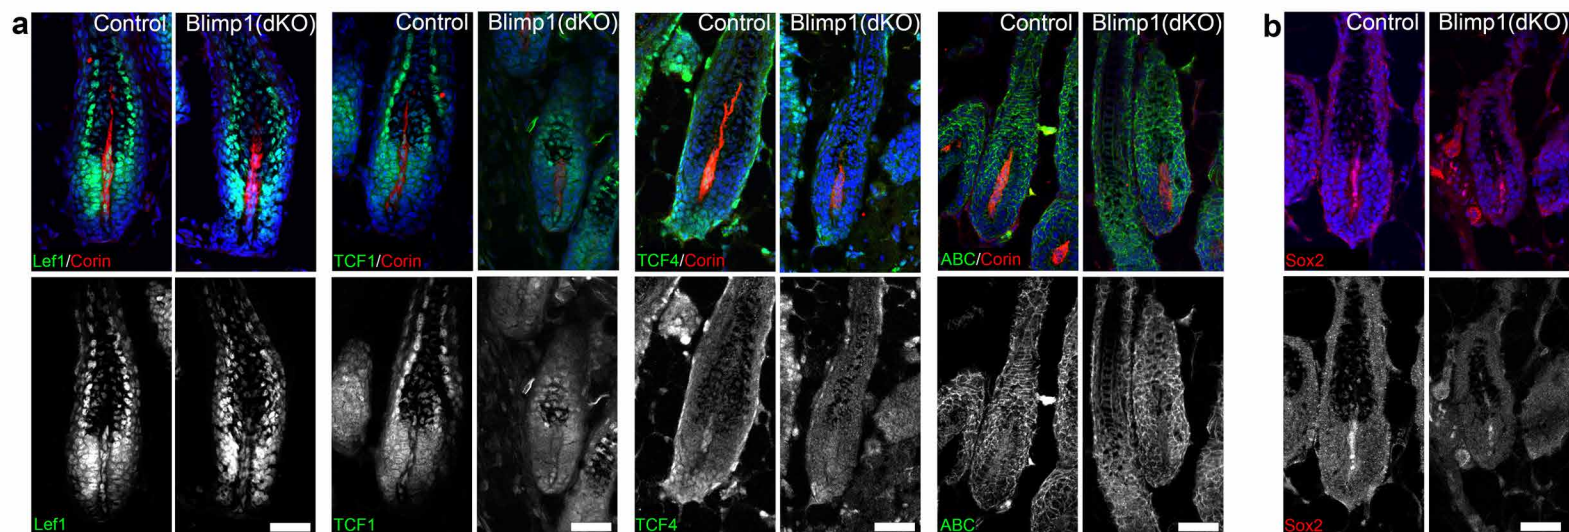

## Figure S5: Dermal Blimp1 loss attenuates Wnt/ $\beta$ -catenin signalling in the DP

**(a)** Immunostaining of Control and Blimp1(dKO) back skin at P11 for Lef1, TCF1, TCF4, active  $\beta$ -catenin (ABC) (green) and Corin (red). **(b)** Immunostaining of Control and Blimp1(dKO) back skin at P11 for Sox2 (red). Nuclei were labelled with DAPI (blue). Scale bars, 100 $\mu$ m.



# Figure S6

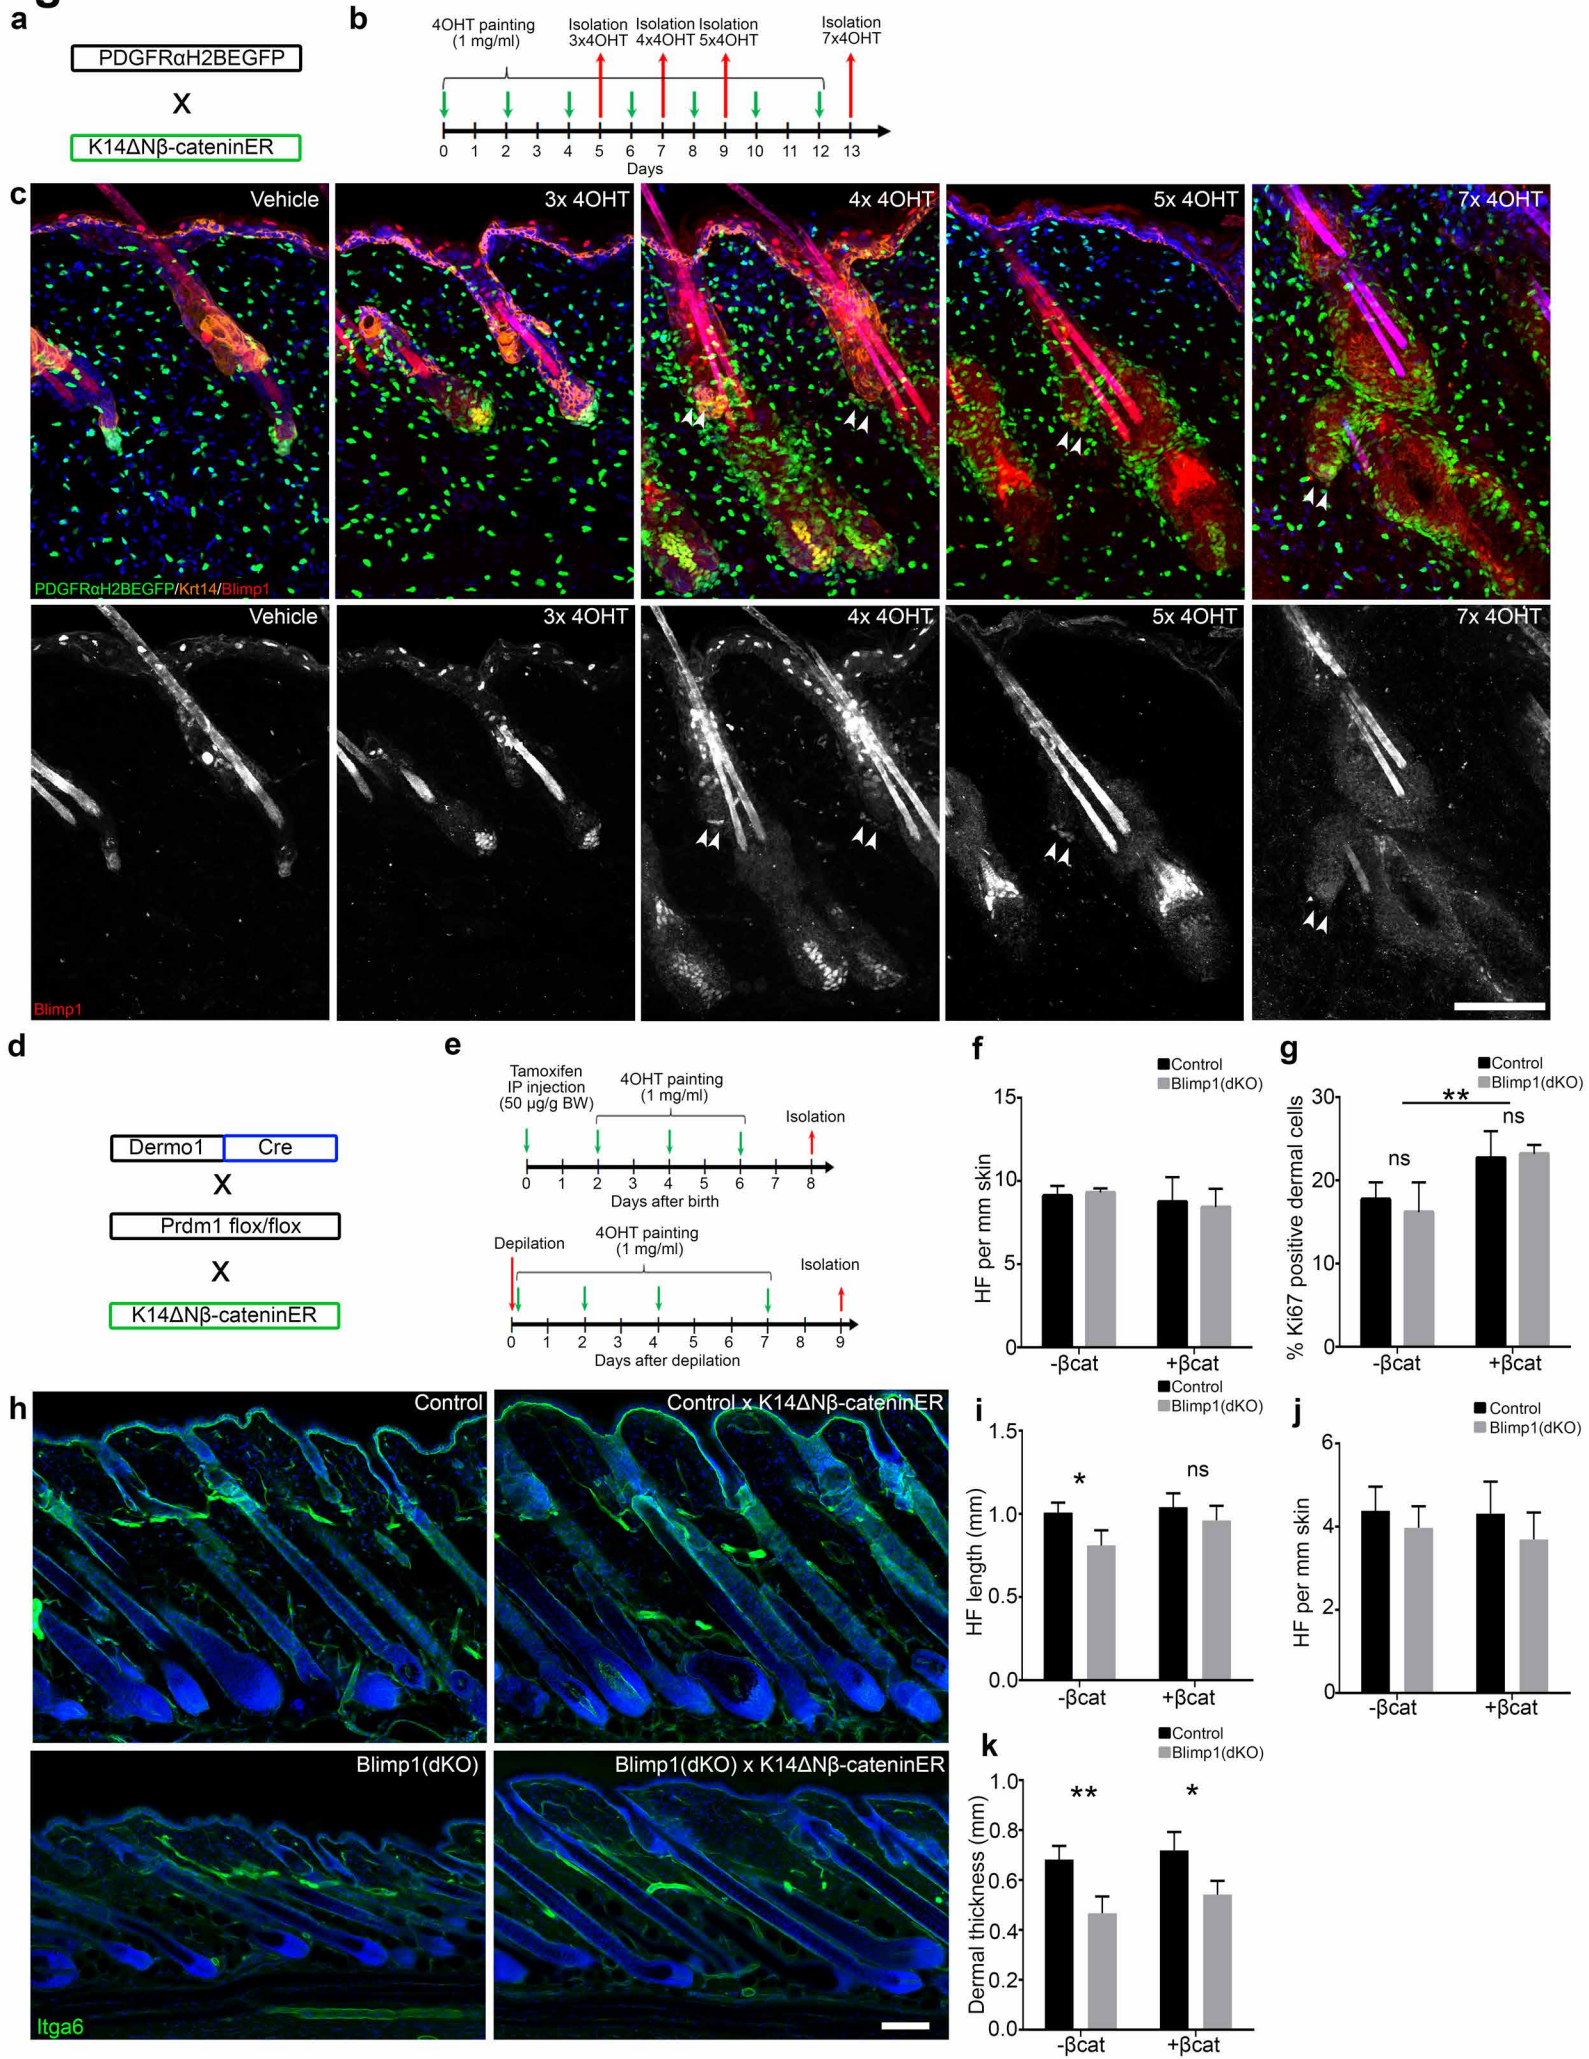

**Figure S6: Epidermal  $\beta$ -catenin overexpression induces Blimp1 expression during anagen and ectopic HF formation and overcomes hair growth defect in Blimp1(dKO) mice after depilation**

**(a,b)** Breeding strategy **(a)** and experimental design **(b)** for epidermal  $\beta$ -catenin activation in adult telogen mice. Note that only after four 4OHT treatments ectopic HFs are formed. **(c)** Immunofluorescence staining for Blimp1 (red) and Krt14 (orange) of K14 $\Delta$ N $\beta$ -cateninER x PDGFR $\alpha$ H2BEGFP back skin section (green) after indicated treatment. **(d,e)** Breeding strategy **(d)** and experimental design **(e)** for epidermal  $\beta$ -catenin activation during dermal maturation (upper panel) and after HF depilation (lower panel). **(f,g)** Quantification of HF density **(f)** and Ki67<sup>+</sup> dermal cells **(g)** at P10 after epidermal  $\beta$ -catenin activation during dermal maturation (n=3 whole mounts per mouse; n=4 Control, 4 Control x K14 $\Delta$ N $\beta$ -cateninER, 3 Blimp1(dKO), 6 Blimp1(dKO) x K14 $\Delta$ N $\beta$ -cateninER biological replicates). **(h-k)** Epidermal  $\beta$ -catenin overexpression in adult mice after HF depilation during anagen induction. Back skin sections from Control, Control with epidermal  $\beta$ -catenin, Blimp1(dKO) and Blimp1(dKO) with epidermal  $\beta$ -catenin were immunostained for Itga6 (green) 9 days after depilation **(h)**. Quantification of HF length **(i)**, HF density **(j)** and dermal thickness **(k)** 9 days after depilation (n=4 whole mounts per mouse; n=3 Control, 4 Control x K14 $\Delta$ N $\beta$ -cateninER, 3 Blimp1(dKO), 3 Blimp1(dKO) x K14 $\Delta$ N $\beta$ -cateninER biological replicates). Nuclei were labelled with DAPI (blue). Data shown are means  $\pm$ s.d. ns, not significant, \*P<0.05; \*\*P<0.005.  $\beta$ cat, 4OHT induced epidermal  $\beta$ -catenin. Scale bars, 100 $\mu$ m.

**Table S1: List of mice lines used in this study**

| <b>Mice strain</b>                | <b>Description</b>                                                                                                                                     | <b>References</b>                                                      |
|-----------------------------------|--------------------------------------------------------------------------------------------------------------------------------------------------------|------------------------------------------------------------------------|
| TopH2BeGFP                        | Wnt reporter: H2B-EGFP is expressed under control of multiple TCF sites                                                                                | Ferrer-Vaquero et al., 2010                                            |
| Blimp1meGFP                       | GFP is expressed under the control of Blimp1 transcriptional regulatory region                                                                         | Ohinata et al., 2005                                                   |
| Prdm1 flox/flox                   | Prdm1 Exons 6-8 are flanked by LoxP sites                                                                                                              | Shapiro-Shelef et al., 2003                                            |
| Dermo1Cre                         | Cre is expressed under control of Twist2 promoter. Dermo1Cre targets all dermal fibroblasts from E12.5 and is not expressed in the epidermis           | Šošić et al., 2003<br>Lichtenberger et al., 2016                       |
| PDGFR $\alpha$ H2BeGFP            | Dermal fibroblasts reporter: H2B-EGFP is expressed under control of PDGFR $\alpha$                                                                     | Hamilton et al., 2003<br>Collins et al., 2011<br>Driskell et al., 2013 |
| K14 $\Delta$ N $\beta$ -cateninER | Truncated $\beta$ -catenin is expressed under the Keratin 14 promoter and translocate to the nucleus upon tamoxifen injection/4OHT topical application | Lo Celso et al., 2004<br>Lichtenberger et al., 2016                    |

**Table S2: List of antibodies used in immunohistochemistry (IHC) and Flow cytometry (FC)**

| <b>Antigen</b> | <b>Conjugate</b> | <b>Supplier</b>      | <b>Reference</b> | <b>Application</b> |
|----------------|------------------|----------------------|------------------|--------------------|
| CD26           | PercP cy5.5      | eBioscience          | 45-0261          | FC                 |
| CD133          | APC              | eBioscience          | 17-1331          | FC                 |
| CD133          | PE               | eBioscience          | 12-1331          | FC                 |
| Ly-6A/E        | AF700            | eBioscience          | 56-5981          | FC                 |
| CD140a         | PE               | eBioscience          | 17-1401          | FC                 |
| Dlk1           | PE               | MBL Int.             | D187-5           | FC                 |
| CD45           | APC              | eBioscience          | 17-0451          | FC                 |
| CD31           | APC              | eBioscience          | 17-0311          | FC                 |
| CD324          | APC              | BioLegend            | 324107           | FC                 |
| Blimp1         | n/a              | eBioscience          | 14-5963-82       | IHC                |
| GFP            | n/a              | abcam                | ab13970          | IHC                |
| K14            | n/a              | Cambridge Bioscience | 906001           | IHC                |
| Ki67           | n/a              | abcam                | ab16667          | IHC                |
| Lef1           | n/a              | Cell Signaling       | 2230s            | IHC                |
| P-Cadherin     | n/a              | R&D                  | AF761            | IHC                |
| CD49f          | n/a              | BioLegend            | 313602           | IHC                |

| <b>Antigen</b> | <b>Host species</b> | <b>Species reactivity</b> | <b>Supplier</b> | <b>Reference</b> | <b>Application</b> |
|----------------|---------------------|---------------------------|-----------------|------------------|--------------------|
| AF 488         | Donkey              | Rabbit                    | ThermoFisher    | R37118           | IHC                |
| AF 555         | Donkey              | Rabbit                    | ThermoFisher    | A-31572          | IHC                |
| AF 647         | Chicken             | Rat                       | ThermoFisher    | A-21472          | IHC                |

**Table S3: List of growth factors used in this study**

| <b>Growth Factor</b> | <b>Concentration (ng/ml)</b> | <b>Supplier</b> | <b>Species of recombinant protein</b> | <b>Reference</b> | <b>Used on murine cells</b> | <b>Used on human cells</b> |
|----------------------|------------------------------|-----------------|---------------------------------------|------------------|-----------------------------|----------------------------|
| TGFβ1                | 10                           | PeptoTech       | Human                                 | 100-21 B         | •                           | •                          |
| TGFβ2                | 10                           | PeptoTech       | Human                                 | 100-35B          | •                           | •                          |
| BMP4                 | 100                          | PeptoTech       | Human                                 | 120-05ET         | •                           | •                          |
| SHH                  | 1                            | R&D             | Murine                                | 461-SH           | •                           | •                          |
| FGF2                 | 20                           | R&D             | Murine                                | 3139-FB          | •                           | •                          |
| EGF                  | 100                          | PeptoTech       | Murine                                | 315-09           | •                           | •                          |
| PDGF-BB              | 10                           | PeptoTech       | Murine                                | 315-18           | •                           | •                          |
| TNFα                 | 10                           | PeptoTech       | Murine                                | 315-01A          | •                           |                            |
| TNFα                 | 10                           | PeptoTech       | Human                                 | 300-01A          |                             | •                          |

**Table S4: Generation of pan-DP signature and panBlimp1 target genes**

This table consists of 3 tabs









|                           |                     |                 |                 |                    |                         |
|---------------------------|---------------------|-----------------|-----------------|--------------------|-------------------------|
| Gfra1                     | Dfna5               | Plagl2          | Arl2bp          | Vav3               | Phf3                    |
| Lrrk2                     | Pr17a2              | Efna2           | Map3k12         | Ahcy               | Ccr1                    |
| Heph                      | Amn                 | Plek            | Cstf1           | Plekho1            | Cacna2d1                |
| ENPP2                     | Pak3                | Pcbp3           | Naa10           | Meis2              | Ebf3                    |
| Hif3a                     | Ccl22               | Spag6           | Ahcy            | Angptl4            | Elavl1                  |
| Dnahc2                    | Igfbp6              | Cyp2j5          | Plekho1         | Dsn1               | 0910001A06Rik           |
| Fosb                      | Gng4                | Itgb5           | Meis2           | Nfxl1              | Sp5b1                   |
| Nol3                      | Tnmd                | Itgb5           | Pmp22           | Fam69b             | Pde3a                   |
| Ptplad2                   | Btd                 | Slc35a1         | Fam69b          | Pdgfrb             | Hsd17b7                 |
| Kif13b                    | Svs3a///Svs3b       | Rps6ka2         | Pdgfrb          | Zxdc               | Slc7a3                  |
| Gm11149                   | Tmem176b            | Rps6ka2         | Zxdc            | Cdk2ap2            | Amot                    |
| Thsd7a                    | Sncb                | Sart3           | Zxdc            | Lztf1              | Zscan18                 |
| FIGNL2                    | Iqcf3               | Zfp68           | Wfdc18          | Ube2l6             | Runx3                   |
| Trim9                     | Elt1d               | Fap             | Cdk2ap2         | Tmem218            | Camk2n1                 |
| Thrb                      | Kera                | Plac1           | Dusp10          | Galk1              | D7Bwg0826e              |
| A330021E22Rik             | Tfpt                | Fyn             | Csnk1e          | Gipc2              | Zic1                    |
| Amot                      | St6galnac4          | Ncald           | Galk1           | Kifap3             | Hoxd1                   |
| Olfm2                     | Nmt1                | Mpg             | Dnaja2          | Hbb-b1///Hbb-b2/// | 8430419K02Rik           |
| Samd14                    | Plvap               | Mpg             | Hbb-b1///Hbb-b2 | Dnajb9             | Syn2                    |
| Adam11                    | Crif2               | Gmppa           | Ube2k           | Kdelr2             | Agtr1b                  |
| Adrbk2                    | Adcy4               | Selenbp1        | Ube2k           | Sertad2            | Tenc1                   |
| Cacna1h                   | Hes1                | Gkap1           | Sod2            | Cldn2              | Rnf144a                 |
| Hmgcl1                    | Hey2                | B9d1            | Wwc2            | Ehd3               | Rora                    |
| Plscr1                    | Tcea2               | Per2            | Nt5c2           | Gpr180             | Skil                    |
| Emilin1                   | Rtkn2               | Camk1           | Sertad2         | Spata5             | Gprc5b                  |
| Stat5b                    | Gspt2               | Camk1           | Tmsb10          | Mmp13              | Hip1                    |
| Olfm3                     | Cyp2d10             | Apoa5           | Capn1           | Ccl6               | B4galt6 /// LOC675709   |
| Tsc22d3                   | Myh11               | Ier5            | Mmp11           | Fkbp11             | Zfp57                   |
| Mir143hg                  | Ccl5                | St6galnac2      | Ehd3            | Cd14               | 5830468K08Rik           |
| Dand5                     | Tgfb1i1             | Itih2           | Ehd3            | Eng                | Tmem166                 |
| Grik5                     | Dcx                 | Rac2            | Pzp             | Pdk4               | Gdnf                    |
| Magi2                     | Kcnj8               | Slc12a2         | Spata5          | Mal                | Tbx18                   |
| Armcx6                    | Tfap2c              | Limk1           | Capzb           | Tulp2              | Omd                     |
| Pcdhb13                   | Mtmr4               | Spa17           | Coq5            | Cyp4f16            | Igfbp3                  |
| PIEZO2                    | Myot                | Lefty1          | Coq5            | Nkd1               | LOC671878 /// Sms       |
| Kcnn3                     | Nr2f1               | Cd79b           | Fkbp11          | Itpr1              | Abca1                   |
| Gmpr                      | Mkrn3               | Galnt15         | Cd14            | Mmp23              | Cdc14b                  |
| Pcyt1b                    | Tlr4                | Aldh1a3         | Cdk9            | Mmp23              | Prkar1b                 |
| Fam149a                   | Tlr4                | Sspn            | Eng             | Lynx1              | BC043118                |
| Ssc5d                     | Zcchc14             | Cdkn1c          | Fam114a1        | H13                | Ets1                    |
| Cela1                     | Zcchc14             | Ndr3            | Mal             | Lrg1               | 4930420K17Rik           |
| Lrrn2                     | Hebp1               | Ndr3            | Nkd1            | Ifi47              | Tmod3                   |
| Gng8                      | Atg3                | Slc4a10         | Itpr1           | Mta1               | Ypel2                   |
| Ksr1                      | Gstt1               | Grb14           | Mmp23           | Mvd                | 5830468K08Rik           |
| Usp11                     | Ramp2               | Ptpro           | Mmp23           | Chrd               | Bcar1                   |
| Camk2n1                   | Plekkg2             | Opn3            | Mapkap1         | Speg               | LOC100040358 /// Zfp521 |
| Per3                      | Aif1                | Arhgap6         | H13             | Brinp1             | 6330403K07Rik           |
| Vcam1                     | Pfn2                | Syt3            | Plekha2         | Pvrl3              | Ntrk2                   |
| Appl2                     | Pfn2                | Cyp46a1         | Lrg1            | Btrc               | LOC545261               |
| 1810041L15Rik             | Omg                 | Gm9905          | Mta1            | Slc23a2            | Cdc216                  |
| Myd88                     | Rbfox2              | Hba-a1///Hba-a2 | Chrd            | Arl6               | Ccr1                    |
| Pcdhb3                    | Loxl3               | Laptm5          | Speg            | Rasa4              | 4832441B07Rik           |
| Soga3                     | Adamts8             | Pqbp1           | Cfb             | Epb4.2             | Flrt2                   |
| Frem1                     | Serpina1b           | Akap8l          | Brinp1          | Emc7               | Amy1                    |
| Izumo4                    | Ifit2               | Pygl            | Pvrl3           | Bloc1s6            | Tnn                     |
| Rgs6                      | Fxyd5               | Pkd2            | Btrc            | Sorbs1             | Spred1                  |
| Tceal3                    | Dpysl4              | Topors          | Anapc11         | Mfap2              | Al844685                |
| 4833422C13Rik             | Ppt2                | Lsp1            | Slc23a2         | Zfp61              | Spon1                   |
| Cpxm1                     | Cdhr1               | Nr0b1           | Slc23a2         | Gpc1               | Rgs6                    |
| Kcnq4                     | Tnfrsf11b           | Azgp1           | Arl6            | Slc7a7             | Hsf2                    |
| Igtp                      | Rlbp1               | Als2            | Rasa4           | Gas6               | Amot                    |
| Ncoa7                     | Rnf128              | Als2            | Ppp1r2          | F3                 | Ppm1a                   |
| Hdx                       | Agtpbp1             | Pla1a           | Peg3            | Nap1l5             | Pdgfra                  |
| Mir369,Mir410,Mir412,Mirg | Rab4a               | Sncg            | Mfap2           | Slc6a3             | Ubash3b                 |
| Cblb                      | Tnfsf12///Tnfsf12Ti | Zfml            | Gpc1            | Srgn               | Slc15a2                 |
| Fgfr1                     | Insl6               | Xpnp2           | Slc7a7          | Fmo1               | Slc5a3                  |
| Mmp17                     | Cog1                | Kcnb1///Pacsin2 | Gas6            | Cdr2               | Zfp462                  |
| Park2                     | Nucb2               | Serinc3         | Smim11          | Gpd2               | 5330433J24Rik           |
| Gria4                     | Wbscr27             | Tor1b           | Nap1l5          | Cd248              | Nid2                    |
| Kctd12b                   | Rnf112              | Aqp8            | Slc6a3          | Dnajc12            | Afap1l2                 |
| Shox2                     | Ftl1///Gm20746///   | Smc1a           | Srgn            | E2f5               | Rerg                    |
| Cdh11                     | Gpr124              | Gpx7            | Rnaseh2c        | Tacc3              | Maoa                    |
| Ssbp2                     | Apccd1              | Gm20738///Gm2   | Cd248           | Tgfb3              | Letm2                   |
| Nphp3                     | Mphosph8            | Ulk2            | Arid1a          | Ifitm2             | Prrx1                   |
| Rspo1                     | Cd97                | Ulk2            | Tgfb3           | Rgs5               | Jag1                    |
| Zfp641                    | Tspan32             | Spon2           | Ifitm2          | Apobec3            | Ccdc138                 |
| Igdcc4                    | Larp6               | Ccnc            | Cap1            | Shd                | Sema3g                  |
| Slc43a3                   | Adam19              | Fam181b         | Cap1            | Cp                 | LOC100044234 /// Nptx2  |
| Arhgef9                   | Tnfaip6             | Ctsz            | Rgs5            | Cp                 | C030033M12Rik /// Rsf1  |
| Gria3                     | Slc16a2             | Ctsz            | Apobec3         | Cp                 | Il17rd                  |
| Ncam1                     | Slc16a2             | Nenf            | Ibsp            | Cp                 | Snrpn /// Snurf         |
| 5430421F17Rik             | Islr                | Gstt2           | Shd             | Serpinf2           | Crispld1                |
| Mill2                     | Gng2                | 1810009A15Rik/  | Serpinf2        | Tgm2               | Grasp                   |
| Cacng7                    | Gng2                | Apobec2         | Tspan7          | Calb1              | Pitpnm3                 |
| Tmem100                   | Mfap5               | Gzma            | Plagl2          | Fbxo32             | Igfbp4                  |
| Meis1                     | Copz2               | Dfna5           | Plagl2          | Plek               | Per2                    |
| Brsk1                     | Pgf                 | Serpinc1        | Pcbp3           | Rab33a             | 1700021K14Rik           |
| Gm15713                   | Matn1               | Timm10b         | Ap3m2           | Cyp2j5             | Nhedc1                  |
| Inhba                     | Vnn1                | Amn             | Slc35a1         | Itgb5              | 6720401G13Rik           |
| Meg3,Mir1906-2,Mir770     | Grem2               | Pak3            | Rps6ka2         | Itgb5              | Jak2                    |
| Mdga2                     | Fgf13               | Nab2            | Flot2           | Hells              | Prrx2                   |
| Aplp1                     | Fgf13               | Igfbp6          | Sart3           | Rps6ka2            | Galnt7                  |
| Snrk                      | Nap1l3              | Gng4            | Fap             | Flot2              | Ntrk3                   |
| Sh3bp5                    | Socs2               | Gng4            | Fyn             | Sart3              | Tmtc1                   |
| Hs6st3                    | Grb2                | Abhd3           | Eif4ebp1        | Fap                | Sox11                   |
| Lanc13                    | Dpt                 | Ilf2            | Med7            | Fyn                | C77405                  |
| Bcl6                      | Rgl1                | Sst             | Ncald           | Eif4ebp1           | Acta2                   |
| Il16                      | Kdelr3              | Cpeb1           | Anapc1          | Mpg                | Trim24                  |
| Lrp3                      | Wasf1               | Fbxo31          | Mpg             | Mpg                | Crim2                   |
| Pyroxd2                   | Stambpl1            | Kpna4           | Mpg             | Mpg                | 1700065O13Rik           |
| Ccdc39                    | Svs6                | Tnmd            | Selenbp1        | Nup210             | AU022245                |
| Hoxc8                     |                     |                 |                 | Timeless           | Hip1                    |

|                                    |                     |                  |                 |                    |                 |
|------------------------------------|---------------------|------------------|-----------------|--------------------|-----------------|
| Zfp575                             | Tssk3               | Tssk1            | Ptges2          | Timeless           | A630033E08Rik   |
| 2010001M06Rik                      | Rtp4                | Ppp1r14d         | Tusc2           | Meox1              | Hck             |
| Lysmd2                             | Cbfa2t3             | Ngb              | Gkap1           | Cd28               | 4933439C10Rik   |
| MTHFR                              | Fgfr4               | Ngb              | B9d1            | Cd276              | BC031353        |
| NDNF                               | Col11a1             | Tmem176b         | Camk1           | Per2               | Fzd3            |
| Tril                               | Avpr1a              | Cml1             | Camk1           | Per2               | C1qtnf7         |
| Svep1                              | Avpr1a              | Exo1             | Calr            | Calr               | A330068G13Rik   |
| Heatr8                             | Slfm1               | C4bp             | Ier5            | Tmem37             | Nhedc1          |
| Spry2                              | Kcnj1               | Abcc5            | Ier5            | Ier5               | 2410025L10Rik   |
| Pabpc5                             | Astn1               | Inpp1            | Gadd45gip1      | Ier5               | Bnip2           |
| 4933407K13RIK                      | En1                 | Nap1l2           | Limk1           | St6galnac2         | Mina            |
| 6030419C18Rik                      | Spata6              | Neurod6          | Atp6v0a1        | Slc12a2            | Prelid2         |
| Tpst1                              | Spata6              | Ltbp3            | Sod3            | Slc12a2            | Epha3           |
| Iffo1                              | Cyp2c50             | Neurod4          | Spa17           | Slc22a4            | Bmp4            |
| Cpq                                | Abhd2               | Eltld1           | Lefty1          | Galnt15            | Ctbp2           |
| Maged2                             | Hspg2               | Ltbp2            | Aldh1a3         | Aldh1a3            | Slc6a6          |
| Scn4b                              | Actn3               | Apoc2            | Sspn            | Sspn               | Ctbp2           |
| Gtdc2                              | Adad1               | St6galnac4       | Cdkn1c          | Sspn               | Rora            |
| Pde3b                              | Calcr               | St6galnac4       | Pvalb           | Cdkn1c             | Tspan7          |
| Nsg1                               | Ptprz1              | B4galt2          | Tbrg4           | Lao1               | LOC545261       |
| Taf4b                              | Fech                | Nrp1             | Ndr3            | Pvalb              | Prkaa2          |
| A330076H08Rik,Mir344g              | S100a13             | Ppp1r14a         | Abhd12          | Elk3               | Riok2           |
| Efr3b                              | Slc38a3             | Plvap            | Grb14           | Ndr3               | Ephb6           |
| Letm2                              | Pcbd1               | Crif2            | Mmp24           | Rtn4ip1            | Ntrk3           |
| Nova1                              | Twist1              | Adcy4            | Kcna5           | Grb14              | Arhgef9         |
| Il17d                              | B3galnt1            | Hey2             | Drg2            | Ptpro              | Trpc1           |
| Shank2                             | Scn1b               | Tcea2            | Soat1           | Opn3               | Slc6a6          |
| Hey1                               | Tesc                | Gspt2            | Soat1           | Mmp24              | Nap1l3          |
| Hoxc4                              | Omd                 | Rbpj             | Gtf2f1          | Kcna5              | Gnaq            |
| Zkscan2                            | Psd3                | Tgfb1i1          | Arhgap6         | Fam20c             | Gprasp1         |
| Phf20l1                            | Gfpt2               | Dcx              | Otub1           | Soat1              | Pcdhb9          |
| Pcsk5                              | Tbx15               | Kcnj8            | Naglu           | Soat1              | Nfxl1           |
| Tmem132e                           | Trh                 | Tfap2c           | Syt3            | Soat1              | Eif2c3          |
| Ache                               | Timd2               | Kcne4            | Gm9905          | Arhgap6            | Eif2s2          |
| B020004J07Rik                      | Timd2               | Nr2f1            | Hba-a1///Hba-a2 | Hba-a1///Hba-a2    | Sobp            |
| Lrp1                               | Myoz2               | Tfcp2            | Got2            | Myh6               | Pctk2           |
| Hspb6                              | Fads3               | Tlr4             | Laptm5          | Akap8l             | C030026M15Rik   |
| Lypd1                              | Gbp8                | Tlr4             | Srsf9           | Pygl               | Kbtbd11         |
| Epha7                              | Ccdc109b            | Stx2             | Mbd3            | Coro1c             | Il17rd          |
| Nfkbie                             | Rxrg                | Tfap4            | Pygl            | Pkd2               | Dcun1d4         |
| Rps6ka5                            | Trpm5               | Zcchc14          | Pkd2            | Itga2b             | Etnk1           |
| Hoxc5                              | Grik5               | Hebp1            | Topors          | Amy1               | Npy1r           |
| Hck                                | Mapk8ip2            | Atg3             | Topors          | Pla1a              | Endod1          |
| Slit2                              | Mbl2                | Sp1              | Nr0b1           | Ccl11              | Agri            |
| Csf1                               | Tek                 | Gstt1            | Cyb5b           | Serinc3            | Zbtb11          |
| Penk                               | Fezf2               | Ramp2            | Pla1a           | Wwtr1              | 9630023C09Rik   |
| Stat5a                             | Ms4a8a              | Malat1           | Sncg            | Tor1b              | Utx             |
| C430049B03Rik,Mir322,Mir351,Mir503 | Cdh2                | Galnt10          | Rasgrp2         | Gpx7               | 6430550H21Rik   |
| Pde3a                              | Aqp5                | Galnt10          | Wwtr1           | Cldn5              | Tbx18           |
| Vvc2                               | Cyp2a12             | Plekkg2          | Wwtr1           | Cldn6              | 4921505C17Rik   |
| Hapln3                             | Eno2                | Aif1             | Mug1            | Spon2              | A830059I20Rik   |
| Ccnd3                              | Qprt                | Pfn2             | Gpx7            | Fam181b            | 4930589M24Rik   |
| Plcl2                              | Chrna1              | Pfn2             | Gm20738///Gm2   | Ctsz               | Vegfa           |
| Shc2                               | Echdc3              | Ggt5             | Zfp704          | Ctsz               | Ctso            |
| Pde8b                              | En2                 | Ceacam9          | Spon2           | Ctsz               | Zfp618          |
| PAGR1A                             | Ppp1r32             | Foxf2            | Ctsz            | Gstt2              | Cd1d1           |
| Gnao1                              | Foxd1               | Csn1s2b          | Ctsz            | Pdxp               | Actn1           |
| MRAS                               | []                  | Lims1            | Ctsz            | Gzma               | Jhdm1d          |
| Hdac4                              | Gfra3               | Apof             | Nenf            | Zp3r               | Tmed8           |
| Prrx2                              | Rhoj                | Rbfox2           | Gstt2           | Pri7a2             | Tef             |
| Prlr                               | Aqp2                | Rbfox2           | 1810009A15Rik/  | 1700001F09Rik///Gr | Slc5a3          |
| 1700104A03Rik                      | F5                  | Ddx25            | Brms1           | Amn                | Slc25a23        |
| Birc3                              | Bmp7                | Htr3a            | Dfna5           | Pdlim4             | Eif2c1          |
| Tbl2                               | Acsl4               | Loxl3            | Gm10015///Gm1   | Nab2               | Snrpn /// Snurf |
| Nlgn2                              | Zeb1                | Adamts8          | Serpinc1        | Igfbp6             | Clock           |
| Dcaf12l1                           | Habp4               | Bhlhe22          | Rap2b           | Ccl9               | Flrt2           |
| Usp13                              | Ift57               | Ezh1             | Ccl22           | Dact1              | Plekkg2         |
| Slc2a10                            | Nfil3               | Fxyd5            | Pdlim4          | Rad51ap1           | D030029J20Rik   |
| Srsf12                             | Hlx                 | Dpysl4           | Igfbp6          | Fam3c              | Arid4b          |
| Idua                               | St3gal1             | Dpysl4           | Dact1           | Pdlim7             | Mpp5            |
| Hoxc6                              | Gdf15               | Dpysl4           | Abhd3           | Cpeb1              | Ppm1a           |
| Magee1                             | Drd2                | Ppt2             | Ilf2            | Ghr                | Hdac6           |
| Matn2                              | Stac                | Zfp276           | Tspan1          | Fbxo31             | Trim47          |
| Thbs3                              | Cideb               | Nr5a1            | Tnmd            | Ada                | Arhgef9         |
| Hmcrn1                             | Akr1c14             | Rnf128           | Btd             | Eif4e3             | Clock           |
| Scara3                             | Cnp                 | Crem             | Asic2           | Tnmd               | Lrrc15          |
| Bmp3                               | Cebpa               | Chkb///ChkbCpt   | Ngb             | Btd                | Neo1            |
| Tmem47                             | Ms4a4d              | Pgpep1           | Tmem176b        | Svs3a///Svs3b      | 2810439F02Rik   |
| Trib2                              | Npy5r               | Agtpbp1          | Cml1            | Svs3a              | Tagln           |
| Fam171b                            | Zfpm2               | Gtf2ird2         | Bhlhe40         | Asic2              | Cmklr1          |
| BICC1                              | Corin               | Tnfsf12///Tnfsf1 | Inpp1           | Ngb                | Flrt2           |
| Gm9159                             | Fads2               | Nucb2            | Ltbp3           | Tmem176b           | Zfp612          |
| Mrc2                               | Rtn2                | Foxg1            | Eef1a2          | Paxbp1             | Psd2            |
| Cdh2                               | Nepr                | Wbscr27          | Kera            | Cml1               | 4930589M24Rik   |
| Gdf11                              | Cys1                | Rnf112           | Tfpt            | Cpd                | Manba           |
| Daam2                              | Pcp2                | Ftl1///Gm20746   | Ndufa10         | C4a///C4b          | Sox11           |
| Gpsm1                              | Stom                | Hist2h2aa2       | St6galnac4      | Bhlhe40            | Sox11           |
| Rian                               | Vstm2b              | Hist2h2aa2       | B4galt2         | Abcc5              | Zmym5           |
| Abl1                               | Tpmt                | Tnnc1            | Dnajc30         | Abcc5              | Krt27           |
| Dlg4                               | Hoxd9               | Gpr124           | Ppp1r14a        | Iqcf3              | Krt25           |
| Sat2                               | Slc22a13            | Apcdd1           | Ufd1l           | Eltld1             | Mcpt4           |
| Jdp2                               | Tlr2                | Cd97             | Plvap           | Eltld1             | Cma1            |
| Asph                               | Shank3              | Gpsm3            | Car4            | Apoc2              | Mrgprb1         |
| Smarca1                            | Cypt1///Cypt7///C   | Zfp275           | Smpx            | St6galnac4         | Pscdbp          |
| Arrb1                              | Gck                 | Larp6            | Adcy4           | B4galt2            | Sla             |
| Trps1                              | Sox4                | Adam19           | Chd3os          | Nrp1               | H2-Ea           |
| Fbln2                              | Nox4                | Rad9a            | Hes1            | Ppp1r14a           | Aqp3            |
| Tex15                              | Svep1               | Tpd52l1          | Hey2            | Plvap              | Rgs1            |
| Tns3                               | St8sia4             | Psg23            | Tcea2           | Smpx               | Ap1s3           |
| Efemp2                             | 1700012L04Rik///C   | Gm11397///Serp   | Rtkn2           | Crif2              | Serpinb1a       |
| Lrrtm4                             | Hipk3               | Tnfaip6          | Gspt2           | Adcy4              | Ckmt1           |
| Chrm2                              | Il4i1///Nup62-il4i1 | Slc16a2          | Mrpl10          | Hey2               | A030004J04Rik   |

|                                                                                                   |                   |               |                  |                      |                            |
|---------------------------------------------------------------------------------------------------|-------------------|---------------|------------------|----------------------|----------------------------|
| CRTC1                                                                                             | Fxyd7             | Slc16a2       | Cyp2d10          | Tcea2                | Tacstd2                    |
| Zfp945                                                                                            | Cd37              | Islr          | Ubfd1            | Gspt2                | Cpa3                       |
| Pcdhb16                                                                                           | Zfp37             | Gng2          | Tgfb1i1          | Cyp2d10              | S100a9                     |
| Slc8a3                                                                                            | Hrh1              | Gng2          | Kcnj8            | Adcy6                | Hdc                        |
| Lynx1                                                                                             | Icosl             | Mfap5         | Kcne4            | Samhd1               | H2-Aa                      |
| Ampd2                                                                                             | Tbxa2r            | Copz2         | Nr2f1            | Bcl3                 | Gpr65                      |
| Map2k6                                                                                            | Dtna              | Matn4         | Tlr4             | Tgfb1i1              | Krt14                      |
| Lama2                                                                                             | Cacna2d3          | Smarcd3       | Zcchc14          | Dcx                  | Ms4a2                      |
| Kdm1b                                                                                             | Elac1             | Nrip1         | Zcchc14          | Dcx                  | Il1rl1                     |
| Rbms3                                                                                             | Tex14             | Yes1          | Tceal8           | Kcnj8                | Serpnb1a                   |
| Hoxa9                                                                                             | Cdk14             | Pgf           | Hebp1            | Tfap2c               | Pscdbp                     |
| Igfbp5                                                                                            | Cdk14             | Matn1         | Dbp              | Myot                 | Krt15                      |
| Stk40                                                                                             | Sptbn1            | Pbbp          | Ndufap3          | Kcne4                | Tpsb2                      |
| Adam22                                                                                            | Rsu1              | Tekt2         | Gstt1            | Nr2f1                | Rgs5                       |
| Gsto2                                                                                             | Poc5              | Slc4a3        | Ramp2            | Tfcp2                | Dsg1a                      |
| Slc4a3                                                                                            | Cyhr1             | Grem2         | Mnt              | Tlr4                 | Ripk4                      |
| Slc22a21                                                                                          | Ift81             | Foxa1         | Ipo4///Tm9sf1    | Tlr4                 | Rgs5                       |
| Pcdhb17                                                                                           | Htra3             | Fgf13         | Plekkg2          | Zcchc14              | Krt28                      |
| Aff2                                                                                              | Flt1              | Nap1l3        | Pfn2             | Zcchc14              | Sla                        |
| Hoxd3                                                                                             | Invs              | Nudt4         | Pfn2             | Zcchc14              | Gfi1                       |
| Lpar4                                                                                             | Rfxank            | Socs2         | Omg              | Tceal8               | Krt1                       |
| Zfp36                                                                                             | Tinag             | Dpt           | Foxf2            | Hebp1                | H2-Aa                      |
| Dchs1                                                                                             | 1700028P14Rik     | Stk3          | Nfu1             | Ramp2                | Krt35                      |
| Srgap3                                                                                            | Klf7              | Pcm1          | Lims1            | Plekkg2              | Shh                        |
| Zfp334                                                                                            | Ss18              | Fzd2          | Rbfox2           | Sdf2l1               | Stfa1 /// Stfa3            |
| Ptch1                                                                                             | Gosr2             | Rgl1          | Gla              | Krt23                | 1110020A10Rik              |
| Cpne2                                                                                             | Fibin             | Isoc2b        | Apip             | Foxf2                | Krt14                      |
| Prdm5                                                                                             | Zfp423            | Kdelr3        | Slc12a7          | Csn1s2b              | BB144871                   |
| Stxbp1                                                                                            | Dhrs4             | Wasf1         | Loxl3            | Lims1                | Serpnb5                    |
| Abcd1                                                                                             | S100b             | Stambpl1      | Bhlhe22          | Gbp2                 | Il7r                       |
| Klhl14                                                                                            | Pde10a            | Defa-rs1      | Gm10349///Gm5    | Rbfox2               | Cyp11a1                    |
| Shd                                                                                               | Abcg5             | Cbfa2t3       | Vps72            | Rbfox2               | Tpsab1                     |
| Apc2                                                                                              | Six6              | Ccnh          | Zfp87            | Gla                  | Krt71                      |
| H6pd                                                                                              | Batf              | Kpna6         | Ifit2            | Padi2                | Dmkn                       |
| Spon1                                                                                             | Gng13             | Fgfr4         | Fxyd5            | Loxl3                | Pkp1                       |
| Frmf3                                                                                             | Vegfc             | Col11a1       | Dpysl4           | Adamts8              | Bnc1                       |
| Ston1                                                                                             | St6galnac5        | Klf1          | Dpysl4           | Apoc3                | Ripk4                      |
| Trim34a                                                                                           | Slc2a10           | Cdh15         | Fn3k             | Rad51                | Adh1                       |
| Dagla                                                                                             | Sim2              | Avpr1a        | Rbfox1           | Serpina1b            | S100a14                    |
| Ppox                                                                                              | Matn2             | Hoxd10        | Rnf128           | Vps72                | Cpz                        |
| Sfrp2                                                                                             | Wdr86             | Gpr162        | Eci1             | Ifit2                | Krt73                      |
| Sobp                                                                                              | Nkd2              | Kcnj1         | Pgpep1           | Fxyd5                | Sprr1a                     |
| St6gal2                                                                                           | Nkd2              | Kcnj1         | Agtpbbp1         | Dpysl4               | Cd74                       |
| Cep170                                                                                            | Clec14a           | Astn1         | Rab4a            | Ppt2                 | Gjb2                       |
| Pcdha1,Pcdha10,Pcdha11,Pcdha12,Pcdha2,Pcdha3,Pcdha4,Pcdha4-g,Pcdha5,Pcdha6,Pcdha7,Pcdha8,Pcdha9,F | Clec14a           | En1           | Tnfsf12///Tnfsf1 | Cdhr1                | Serpnb5                    |
| Clec14a                                                                                           | Gnb4              | Phox2a        | Insl6            | Rlbp1                | Krt5                       |
| Hs3st3a1                                                                                          | Gnb4              | Khdrbs1       | Cog1             | Agtpbbp1             | 2010205A11Rik /// EG628-   |
| Lsmp                                                                                              | Sell              | Spata6        | Foxg1            | Mtf1                 | 1600029D21Rik              |
| Cadm2                                                                                             | C3ar1             | Cyp2c50       | Rnf112           | Recql                | Epgn                       |
| Ranbp17                                                                                           | Fam19a5           | Mpdz          | Gas8             | Rab4a                | Irf6                       |
| Mov10                                                                                             | Fam19a5           | Ptx3          | Ftl1///Gm20746,  | Gtf2ird2             | Dsc3                       |
| Plekkg2                                                                                           | Pabpc2            | Hspg2         | Siva1            | Tnfsf12///Tnfsf12Tnl | Adipoq                     |
| Runx1t1                                                                                           | Ghdc              | Akr1c13       | Gpr124           | Dnmt3b               | Gata2                      |
| Hip1                                                                                              | Stc2              | Actn3         | Terf1            | Cog1                 | Rbm35a                     |
| Zic3                                                                                              | Pitx1             | Adad1         | Apccd1           | Nucb2                | Serpnb5                    |
| Tenc1                                                                                             | Igf1              | Cts6          | Apccd1           | Wbscr27              | Hdc                        |
| Masp1                                                                                             | Tph1              | Ptprz1        | Gbp3             | Rnf112               | Mpzl2                      |
| Npr2                                                                                              | Fthl17///Gm14458, | 2810428I15Rik | Cd97             | Zfp42                | Rgs5                       |
| Gm10400                                                                                           | Ppp1r2-ps9        | S100a13       | Zfp275           | Retnlb               | 1600029D21Rik              |
| Fam161a                                                                                           | Arg1              | Ngp           | Tspan32          | Pgam2                | Serpnb2                    |
| Inpp1                                                                                             | Zfp467            | Twist1        | Larp6            | Gpr124               | Actc1 /// LOC100048431     |
| Dfna5                                                                                             | Slc28a3           | B3galnt1      | Adam19           | Apccd1               | Ptprc                      |
| Bcl2                                                                                              | Slc28a3           | Tesc          | Rad9a            | Apccd1               | Fyb                        |
| Pdgfra                                                                                            | Lgals1            | Omd           | Pde8a            | Mphosph8             | AW551984                   |
| Gnl2                                                                                              | Ttc28             | Sit1          | Pr18a6           | Phf21a               | BC100530 /// Stfa1 /// Stf |
| Agphd1                                                                                            | Rp2h              | Gfpt2         | Tnfaip6          | Gbp3                 | Dpp4                       |
| Ptchd4                                                                                            | Cd93              | Tbx15         | Mkrn1            | Itga7                | Figf                       |
| Man1a                                                                                             | Unc5c             | Trh           | Mix              | Cd97                 | Trp63                      |
| Tram1l1                                                                                           | Defb4             | Trim69        | Fabp2            | Tspan32              | 5033414K04Rik              |
| STAT2                                                                                             | Ifi204            | Cd2           | Slc16a2          | Larp6                | Cdh1                       |
|                                                                                                   | Zbp1              | Fads3         | Slc16a2          | Adam19               | Col17a1                    |
|                                                                                                   | 1700010I14Rik     | Ccl25         | Rras             | Adam19               | Ccl11                      |
|                                                                                                   | Hspa1l            | Ccdc109b      | Islr             | Cav3                 | Serpnb5                    |
|                                                                                                   | Ghrh              | Rxrg          | Gng2             | Msc                  | Calm4                      |
|                                                                                                   | 2310057J18Rik///2 | Grik5         | Gng2             | Tnfaip6              | Mt4                        |
|                                                                                                   | Slc25a36          | Mapk8ip2      | Mfap5            | Sp7                  | Dsp                        |
|                                                                                                   | C920025E04Rik///1 | Tek           | Copz2            | Fabp2                | Figf                       |
|                                                                                                   | Ogn               | Fezf2         | Anapc7           | Slc16a2              | Dct                        |
|                                                                                                   | Ogn               | Cds2          | Ccdc91           | Slc16a2              | Ptgds                      |
|                                                                                                   | Nupr1             | Ms4a8a        | Rnf141           | Islr                 | Krt17                      |
|                                                                                                   | Nupr1             | Srp3k         | Smarcd3          | Gng2                 | EG628498 /// ENSMUSG0C     |
|                                                                                                   | Sgcb              | Bhlha15       | Yes1             | Gng2                 | Tpsb2                      |
|                                                                                                   | Prtn3             | R74862        | Pgf              | Mfap5                | Ror1                       |
|                                                                                                   | Spock1            | Sct           | Aspa             | Smarcd3              | Scel                       |
|                                                                                                   | Spock1            | 3110070M22Rik | Matn1            | Anxa11///Gm2260//    | Myb                        |
|                                                                                                   | Masp1             | Cdh2          | Pbbp             | Pgf                  | Perp                       |
|                                                                                                   | Lats2             | Aqp5          | Grem2            | Aspa                 | EG628498 /// ENSMUSG0C     |
|                                                                                                   | Gpc6              | Eno2          | Foxa1            | Matn1                | Ifi202b                    |
|                                                                                                   | Gpc6              | Slc30a4       | Fgf13            | Pbbp                 | Spint2                     |
|                                                                                                   | Camp              | Ap4m1         | Nap1l3           | Slc4a3               | Asprv1                     |
|                                                                                                   | Colec12           | Epc1          | Hspa9            | Calcl                | Krt79                      |
|                                                                                                   | Prom1             | Aox3          | Socs2            | Grem2                | Krt85 /// LOC100044179     |
|                                                                                                   | Col5a3            | Echdc3        | Dpt              | Ebf2                 | Chrdl1                     |
|                                                                                                   | Akap12            | En2           | Stk3             | Foxa1                | Syt12                      |
|                                                                                                   | Wnt6              | Sfxn4         | Stk3             | Fgf13                | Csta                       |
|                                                                                                   | 1700029F12Rik     | Foxd1         | Pcm1             | Fgf13                | Pof1b                      |
|                                                                                                   | Gabrb1            | []            | Dad1             | Kcne3                | Krtdap                     |
|                                                                                                   | Gp9               | Acrv1         | Fzd2             | Nap1l3               | Myog                       |
|                                                                                                   | Tpm2              | Gfra3         | Fzd2             | Socs2                | Prkcb1                     |
|                                                                                                   | Pde6b             | Nlrp5         | Rgl1             | Dpt                  | S100a3                     |
|                                                                                                   | Abcd2             | Rhoj          | Kdelr3           | Rgl1                 | Clca2                      |
|                                                                                                   | Abcb1a            | Ufm1          | Centp            | Kdelr3               | Cd53                       |

|               |                   |               |              |                           |
|---------------|-------------------|---------------|--------------|---------------------------|
| Abcb1a        | F5                | Wasf1         | Wasf1        | Rab27b                    |
| Cul2          | Bmp7              | Stambpl1      | Stambpl1     | Abcc9                     |
| []            | Acs14             | Cetn2         | Cga          | Trp63                     |
| []            | Bhmt2             | Cbfa2t3       | Opn1sw       | Dpp4                      |
| AA672641      | Spp2              | Traf3         | Rtp4         | Coro1a                    |
| Rpl27a        | Cldn15            | Top3a         | Cbfa2t3      | Myb                       |
| []            | Cadm3             | Col11a1       | Ccnh         | Plau                      |
| Ccdc12        | Cadm3             | Avpr1a        | Nrsn1        | LOC666466 /// Obox2       |
| Hdlbp         | Slc17a3           | Astn1         | Fgfr4        | Lum                       |
| Adcy9         | Zeb1              | En1           | Avpr1a       | Kit                       |
| Pkhd1         | Habp4             | Icam5         | Avpr1a       | Abca9                     |
| Eif3e         | Ift57             | Rab2a         | Sfn1         | Lpl                       |
| Arap3         | Nfil3             | Cyp2c50       | Astn1        | H2-Eb1                    |
| []            | Dio2              | Ino80b        | En1          | 8430420F16Rik             |
| Prpf19        | Hlx               | Rmdn1         | Clu          | Cd200r3                   |
| Krt72         | Ift74             | Abhd2         | Khdrbs1      | Adrb1                     |
| Gm2682        | St3gal1           | Mpdz          | Ube2h        | Astn2                     |
| []            | Nek3              | Hspg2         | Tspan13      | Fxyd3                     |
| []            | Gdf15             | Actn3         | Spata6       | H2-Ab1 /// LOC641240 ///  |
| []            | Txlnb             | Alg13         | Cyp2c50      | Nat8l                     |
| 2810449G22Rik | Zfp93             | Lin7b         | Rmdn1        | Krt26                     |
| []            | Stac              | Hnrnpc        | Abhd2        | Rgs18                     |
| D930048N14Rik | Nosip             | Inmt          | Mpdz         | Zcchc5                    |
| Tet1          | Cideb             | 2810428I15Rik | Hspg2        | Lpl                       |
| Hpgd          | Akr1c14           | Apoc4         | Actn3        | Sp6                       |
| Hpgd          | Cebpa             | Pcbd1         | Serpind1     | Rgs5                      |
| Fcrla         | Ms4a4d            | Twist1        | Adad1        | Ikzf1                     |
| []            | Lym5              | B3galnt1      | Calcr        | Slco4a1                   |
| Srxn1         | Bves              | Tbx15         | Ttc36        | Clec12b                   |
| C77144        | Klk1b5            | Trim69        | Rbms1        | Lgals7                    |
| Cphx3         | Rhag              | Nit2          | S100a13      | Ift202b                   |
| Deptor        | Wisp2             | Bpnt1         | Slc38a3      | Rgs4                      |
| Slc35a5       | Corin             | Timd2         | Mrps25       | Dapp1                     |
| Arhgef25      | Akap4             | Cpb2          | Twist1       | Stfa2l1                   |
| Creb3         | Gif               | Fads3         | H2-Q2        | Aoc2 /// Aoc3             |
| Gba2          | Fads2             | Gbp8          | B3galnt1     | Marveld3                  |
| []            | Csnk2a1           | Ccdc109b      | Scn1b        | Agtr1a                    |
| Zfp644        | Cyp2d22           | Grik5         | Tesc         | Clec4d                    |
| Rab3il1       | Cyp2d22           | Srpk3         | Omd          | Gucy1a3                   |
| Rab3il1       | Pcnx              | R74862        | Psd3         | 1190003J15Rik             |
| Xbp1          | Rtn2              | Fasl          | Gfpt2        | Car3                      |
| Aak1          | Slc5a1            | 3110070M22Rik | Adcy8        | Dsp                       |
| C80171        | Ugt8a             | Cdh2          | Tbx15        | 2200001I15Rik             |
| Slu7          | Cys1              | Aqp5          | Cyth3        | C130090K23Rik             |
| Maf1          | Cys1              | Arl8b         | Cd55         | Osr2                      |
| []            | Tmeff2            | Qprt          | Timd2        | Clca2                     |
| Mtfr1l        | Mpp3              | Foxd1         | Fads3        | Lypd3                     |
| []            | Pcp2              | []            | Gbp8         | Il1r2                     |
| Tktl1         | Pcp2              | Gfra3         | Ccl25        | Ucp2                      |
| Fzd3          | Sf3a1             | Nlrp5         | Ccdc109b     | Sox21                     |
| []            | Slk               | Csnk1d        | Rxrg         | Krt16                     |
| Zfp334        | Nr1h4             | Rhoj          | Trpm5        | Rgs18                     |
| Zfp334        | Ophn1             | Rpn2          | Grik5        | Odz2                      |
| AA517858      | Nlk               | Chid1         | Mapk8ip2     | Dsc1                      |
| Pttg1ip       | Alg14             | F5            | Tek          | Penk1                     |
| AA517023      | Vstm2b            | Bmp7          | Fezf2        | Vav3                      |
| Spsb1         | Pdgfc             | Cadm3         | Srpk3        | Kit                       |
| Igl1l         | Ptpn18            | Cadm3         | R74862       | Ctsg                      |
| []            | Hoxd9             | Zeb1          | Serpina5     | Tnxb                      |
| C76628        | Npy               | Habp4         | Cdh2         | Adh7                      |
| Tmem191c      | Ltb               | Ift57         | Cyp2a12      | Grhl2                     |
| []            | Shank3            | Nfil3         | Irgm1        | Gpr87                     |
| []            | Acvr2b            | Dio2          | Eno2         | Abcc9                     |
| []            | Ctsr              | Dio2          | Agxt         | Rassf9                    |
| []            | 2810417H13Rik     | Pcdhb22       | Arg2         | Cd200r2 /// Cd200r4 /// L |
| []            | Sox4              | Cysl1r1       | Ppp1r32      | Nfib                      |
| []            | Nox4              | St3gal1       | Abcb1b       | Eppk1                     |
| []            | Zfp260            | Gdf15         | Sfxn4        | Rgs7bp                    |
| []            | Fam174a           | Fbxo16        | Foxd1        | Tcrg-V3                   |
| []            | Svep1             | Tssk6         | []           | Gata2                     |
| Prss58        | Mlxipl            | Stac          | Gfra3        | Hopx                      |
| []            | 1700012L04Rik/    | Slc35g3       | Rhoj         | Krt10                     |
| Prss29        | Il4i1///Nup62-il4 | Skp2          | Rpn2         | Dlk1                      |
| []            | Fxyd7             | Bcl10         | F5           | Acpp                      |
| []            | Zfp37             | Akr1c14       | Bmp7         | Gstm2                     |
| []            | Hrh1              | Cebpa         | Spp2         | Slc39a8                   |
| AA414903      | Cacna2d3          | Ms4a4d        | Cldn15       | 4632413I24Rik             |
| []            | Cct6b             | F10           | Zeb1         | Nfib                      |
| []            | Elac1             | Baat          | Habp4        | DLx2                      |
| Clec4e        | Aire              | Bves          | Maff         | E130203B14Rik             |
| Lce1d         | 9530002B09Rik     | Crybb3        | Dio2         | Slc4a4                    |
| Slc12a8       | Rgs2              | Rhag          | Dio2         | Fgfbp1                    |
| Gbx2          | Cdk14             | Corin         | Hlx          | Grhl3                     |
| Asb12         | Cdk14             | Mcf2          | Pcdhb22      | Tacstd1                   |
| Lhx5          | Sptbn1            | Eno1///Eno1b  | St3gal1      | Kcne3                     |
| Ptgr          | Acad8             | Eno1          | Gdf15        | Tmcc3                     |
| Krtap13       | Tns1              | Fads2         | Stac         | Figf                      |
| Spesp1        | Ift81             | Cntnap4       | Skp2         | Pkp3                      |
| Csn2          | Jam2              | Rtn2          | Bcl10        | Lhx2                      |
| St8sia2       | Mettl6            | Ier5l         | Cideb        | Plek                      |
| Apobr         | Htra3             | Cys1          | Akr1c14      | Myb                       |
| Pard3         | Creb3l1           | Saa1          | Cnp          | Arhgap24                  |
| Ubl4b         | Flt1              | Apom          | Cebpa        | Adamts16                  |
| Sval1         | Heyl              | Ophn1         | Ms4a4d       | Cntfr                     |
| Ramp3         | Heyl              | Hoxd9         | Bak1         | Dsg2                      |
| Atp2b2        | T                 | Itgax         | Gtsf1l       | Mmp2                      |
| Slco1a4       | Invs              | F13b          | Cryba2       | Apoc1                     |
| Peg12         | Pdpn              | Tlr2          | Zfpm2        | Tmprss13                  |
| Slc7a11       | Atp2a1            | Shank3        | Corin        | ORF63                     |
| Sema3a        | Saa4              | 2810417H13Rik | Eno1///Eno1b | Gzma                      |
| Sema3a        | Chst5             | Sox4          | Eno1         | Cldn1                     |
| Pcdhb21       | Pdxdc1            | Sox4          | Fads2        | Esrrg                     |

|                   |                  |                   |                     |                             |
|-------------------|------------------|-------------------|---------------------|-----------------------------|
| Tcl1b4            | Sorbs3           | Sox4              | Csnk2a1             | Itgb2                       |
| Prdm1             | Cdh17            | Acy1              | Iigp1               | Nfia                        |
| Pcdhb3            | Ctla4            | Svep1             | Rtn2                | C1qtnf2                     |
| Cldn16            | Neu3             | Il4i1///Nup62-il4 | Ugt8a               | 2210023G05Rik               |
| 1700011A15Rik     | Epha8            | Fxyd7             | Cys1                | Grem1                       |
| Orm2              | Pth              | Zfp37             | Saa1                | Elmod1                      |
| Ppy               | Bpifa2           | Icosl             | Mpp3                | S100a8                      |
| Sult1e1           | Cyp2d9           | Tnfrsf11a         | Tnfsf11             | Mcoln3                      |
| Krtap5-2          | Fibin            | Cep131            | Timp3               | Gp49a /// Lilrb4            |
| Dvl3              | Fxyd2            | Vangl2            | Timp3               | Plch2                       |
| Il1rapl2          | Zfp423           | Xirp1             | Tdo2                | Dcn                         |
| Gm2083///Mup1//   | S100b            | Tbxa2r            | Stom                | Ndst3                       |
| 4933411G06Rik     | Pde10a           | Cacna2d3          | Vstm2b              | Ctnnd2 /// LOC100045979     |
| Vtn               | Pde10a           | Cct6b             | Hcst                | Sprr2f                      |
| Klk1b16           | Myog             | Elac1             | Mettl1              | Prss35                      |
| Stxbp1            | Abcg5            | 9530002B09Rik     | Pdgfc               | Krt77                       |
| Dkk2              | Hc               | Cdk14             | Hoxd9               | A430001F24Rik               |
| Tmem47            | Tac2             | Cdk14             | Npy                 | Adam33                      |
| a                 | Vegfc            | Rsu1              | Shank3              | Mmp2                        |
| Gpatch2           | St6galnac5       | Snrpb             | Cypt1///Cypt7///Cyp | Kif2c                       |
| Crybb2            | Ank1             | Adrm1             | Cd163               | 1190003J15Rik               |
| Chn1              | Stab2            | Poc5              | Smtnl1              | Coro1a                      |
| Alx3              | Ccl21a///Ccl21b/ | Usp48             | Gck                 | C2                          |
| Selp              | Csf3             | Ift81             | Serpine1            | 9330182L06Rik               |
| Shox2             | Cyp26a1          | Htra3             | Sox4                | Ovol1                       |
| Trpc7             | Slc2a10          | Heyl              | Sox4                | Ucp2                        |
| Insr              | Matn2            | Rfxank            | Sox4                | Cldn1                       |
| AK009121          | Tbc1d1           | Padi1             | Nox4                | Sorcs2                      |
| Lpar2             | Pias2            | Sorbs3            | Zfp260              | Mt2                         |
| Ptp4a2            | Wdr86            | Ctla4             | Zfp260              | Nckap11                     |
| Dnaja3            | Nkd2             | BC051019          | Svep1               | Rgs4                        |
| Bscl2             | Nkd2             | Klf7              | Fhl2                | Si                          |
| Sqrdl             | Clec14a          | Sorcs2            | St8sia4             | Vwa2                        |
| Zfhx3             | Clec14a          | Mrpl35            | 1700012L04Rik///Gr  | Bpil2                       |
| Ate1              | Gnb4             | Zmat5             | Il4i1///Nup62-il4i1 | Dlx3                        |
| Ucp3              | Gnb4             | Fibin             | Wfdc15b             | Dapp1                       |
| Lrrc6             | Clec2d           | Fxyd2             | Fxyd7               | H19                         |
| Doc2b             | Fam19a5          | Zfp423            | Zfp37               | Tyr                         |
| Doc2b             | Fam19a5          | Dhrs4             | Cxcl1               | St14                        |
| Sgce              | Pabpc2           | Ubqln1            | Hrh1                | Cd52                        |
| 4933415F23Rik     | Ghdc             | Pde10a            | Icosl               | F2r11                       |
| Fgf10             | Ggps1            | Abcg5             | Tbxa2r              | Ly6a                        |
| Csf2ra            | Ces1e            | Mns1              | Cacna2d3            | Tyr                         |
| Srcin1            | Msh4             | Batf              | Krt12               | Nfib                        |
| Hpn               | Igf1             | Gng13             | Helb                | Opcml                       |
| Cd247             | Nat8             | Rarg              | Tex14               | Rgs7bp                      |
| Tex15             | Zfp94            | Vegfc             | Cdk14               | Dsg2                        |
| 4921536K21Rik     | Fgr              | St6galnac5        | Cdk14               | Bcl2a1a /// Bcl2a1b /// Bcl |
| Cab39l            | Comp             | Ptf1a             | Eps15               | 2610301F02Rik               |
| Mzf1              | Sult2a2          | Gaa               | Mthfd2              | Mcoln3                      |
| Cntn3             | Il12b            | Slc2a10           | Mthfd2              | EG328264                    |
| Il25              | 1700102P08Rik    | Matn2             | Sptbn1              | Lrmp                        |
| Ppp3cc            | Olr1             | Gnai2             | Dazap1              | Ap2b1                       |
| Adat1             | Fthl17///Gm144!  | Pias2             | Pip4k2a             | Cxcl12                      |
| Fut7              | Ppp1r2-ps9       | Magt1             | Ccl12               | Zim1                        |
| 1700019G17Rik     | Dazl             | Gtl3              | Cyhr1               | Ikzf3                       |
| Dhx58             | Arg1             | Wdr86             | Ift81               | P4ha2                       |
| 4933400A11Rik     | Elf5             | Nkd2              | Jam2                | Twist2                      |
| Tas1r3            | Birc6            | Nkd2              | Htra3               | Tusc5                       |
| Tnfrsf17          | Zfp467           | Clec14a           | Flt1                | Nfia                        |
| Gm10256///Gm102   | Fank1            | Clec14a           | Fzd4                | Zfp179                      |
| Art2b             | Isg20            | Gnb4              | Heyl                | Ly6d                        |
| Ahrr              | Lgals1           | Gnb4              | Tnfrsf13c           | Fn1                         |
| Pcdha1///Pcdha10, | Mbl1             | Nudc              | Invs                | Tacstd1                     |
| Myl10             | Dlg4             | Fam19a5           | Pdpn                | Ptgs2                       |
| Hdac7             | Ttc28            | Fam19a5           | Atp2a1              | Grhl1 /// LOC100043996      |
| Vamp2             | Spag1            | Slco1a6           | Ccnt1               | Aspn                        |
| Vamp2             | Cd93             | Pabpc2            | Tinag               | C77370                      |
| Ntrk2             | Unc5c            | Krtap15           | Saa4                | Clec7a                      |
| Ntrk2             | Ifi204           | Ces1e             | F7                  | Nfib                        |
| Plekha3           | Clec10a          | Cnih3             | Lhx9                | Ncapg                       |
| Gm21540///Tmed2   | Tnf              | Igf1              | 1700028P14Rik       | Gm266                       |
| Gucy1b3           | 4632415L05Rik    | Zmynd19           | 1700080E11Rik       | Gm885                       |
| Gm4887///Twf1     | Kcnn1            | Irx4              | Klf7                | 1600029D21Rik               |
|                   | Sep-06           | 1700010I14Rik     | Fthl17///Gm144!     | Klf7                        |
| Nsd1              | Ghrh             | Atp6v1c1          | Klf7                | Gda                         |
| Sln               | 2310057J18Rik//  | Cd47              | Ss18                | Zfp750                      |
| Xbp1              | Zfr              | Lipc              | Gosr2               | Gas1                        |
| Tgfbr1            | Slc25a36         | Lgals1            | Atp6v1b1            | 4833423E24Rik               |
| Tgfbr1            | C920025E04Rik/,  | Mbl1              | Fibin               | Mmp23                       |
| St6galnac3        | Ogn              | Ttc28             | Zfp423              | Krtap3-2 /// Krtap3-3       |
| Il17ra            | Srr              | Rp2h              | Dhrs4               | Ereg                        |
| Vegfa             | Nupr1            | Unc5c             | S100b               | Hmga2-ps1                   |
| Ppap2c            | Nupr1            | Ifi204            | Pde10a              | 1100001H23Rik /// LOC10     |
| Mfge8             | Sgcb             | Ccr1              | Abcg5               | Htra3                       |
| Hs6st2            | Prtn3            | 4632415L05Rik     | S100a8              | Rab27b                      |
| Rgs5              | Spock1           | 4632415L05Rik     | Batf                | Ror1                        |
| Atrx              | Spock1           | Kcnn1             | Gng13               | Cobll1                      |
| Enc1              | Masp1            | Prss21            | Vegfc               | A630038E17Rik               |
| Arid5b            | 2810408M09Rik,   | Hspa1l            | St6galnac5          | Ifit2                       |
| Kif3b             | Gpc6             | Ghrh              | Ccl21a///Ccl21b///C | Tmem54                      |
| 4933411K20Rik     | Gpc6             | 2310057J18Rik//   | Cntfr               | Muc15                       |
| Hsd17b11          | Camp             | Nkain1            | Spam1               | Ccrl2                       |
| Aaed1             | Ltc4s            | Yae1d1            | Slc2a10             | Trim29                      |
| Ranbp17           | Colec12          | Ogn               | Tsk                 | Gpr109a                     |
| Acyp1             | St8sia1          | Ogn               | Matn2               | Loxl1                       |
| Gna12             | Prom1            | Nupr1             | Tbc1d1              | Plek                        |
| Mef2c             | Anks3            | Nupr1             | Gnai2               | Ppp1r14a                    |
| Mef2c             | Col5a3           | Sgcb              | Wdr86               | Gfra2                       |
| Npas2             | Akap12           | Prtn3             | Nkd2                | Pla2g2e /// Pla2g2f         |
| Kcnn4             | Wnt6             | Ftcd              | Nkd2                | Efemp1                      |
| Mrc2              | Gabbr1           | Spock1            | Clec14a             | Itih5                       |

|                 |               |                 |                    |                          |
|-----------------|---------------|-----------------|--------------------|--------------------------|
| Alg2            | Cxcl5         | Spock1          | Clec14a            | Abca9                    |
| Mllt1           | 1700037H04Rik | Dpep1           | Gnb4               | Ptgfr                    |
| Guca1a          | H2-DMb2       | 2810408M09Rik,  | Gnb4               | Irx4                     |
| Jak2            | Abcd2         | Gpc6            | Ehf                | Trpm1                    |
| Jak2            | Nfx1          | 2610002M06Rik,  | Ehf                | Samsn1                   |
| Phf2            | Abcb1a        | Camp            | Sell               | Lgr5                     |
| Gpc4            | Abcb1a        | Colec12         | Fam19a5            | S100a16                  |
| Trpc1           | Nkap          | St8sia1         | Fam19a5            | LOC100047619 /// Slc7a5  |
| Cml2            | Padi3         | Prom1           | Pabpc2             | Arhgap30                 |
| Nkx2-2          | Gm16343///Gm1 | Col5a3          | Ghdc               | C920025E04Rik /// H2-T23 |
| Cdk5r1          | Dnajc1        | Car5b           | Stc2               | 6330406115Rik            |
| Zfp111          | []            | Akap12          | Ripk1              | Esr1                     |
| Edn3            | AA517864      | Wnt6            | Ces1e              | Rnf43                    |
| Gnao1           | AA516738      | Gabrb1          | Igf1               | Nfia                     |
| Hcn2            | []            | Tpm2            | Comp               | Aspn                     |
| Abcg3           | Rpl27a        | Abcd2           | Il23a              | Aqp3                     |
| Plcb1           | []            | Abcb1a          | Nhlh1              | 5033414K04Rik            |
| Thap2           | Hdlbp         | Abcb1a          | Ppp1r2-ps9         | Plek                     |
| Mgat4c          | Cog4          | Nkap            | Fahd1              | Sox21                    |
| Ttyh2           | S100a1        | Aplf            | Arg1               | Lcp1                     |
| Mettl7a1        | Kif17         | []              | Stk39              | Plac8                    |
| Ccr2            | Kif17         | []              | Stk39              | Nrn1                     |
| Ptpn11          | Mark1         | AA516738        | Fank1              | Chst11 /// Phactr1       |
| Ilgav           | []            | Agap2           | Isg20              | Mmp12                    |
| Tro             | Prpf19        | LOC102638854    | Slc28a3            | Il18r1                   |
| Chrna4          | []            | 2610019E17Rik/, | Slc28a3            | Plxnc1                   |
| Plxna1          | []            | Hdlbp           | Lgals1             | Egfr                     |
| Pknnox1         | Tlr7          | Adcy9           | Slc7a12            | Thbs2                    |
| Ptptr           | []            | S100a1          | Dlg4               | Lama5                    |
| Pax9            | []            | Errfi1          | Ttc28              | Arg2                     |
| Slc39a9         | []            | Arap3           | Cd93               | Ptgs2                    |
| Zfp40           | 2810449G22Rik | Dlx1as          | Gsdmc///Gsdmc2     | Mpz12                    |
| Pigb            | 2810449G22Rik | []              | Unc5c              | AW551984                 |
| Lipg            | []            | 2810449G22Rik   | Ifi204             | Al661453                 |
| Ugcg            | []            | C77545          | Zbp1               | Il1b                     |
| Pik3ap1         | []            | Tet1            | Ccr1               | Sbsn                     |
| Hspb7           | C77545        | Hpgd            | Ccr1               | Oxtr                     |
| Cacna1c         | AA536748      | D15Erttd55e     | 4632415L05Rik      | Myh11                    |
| Lef1            | Tet1          | D15Erttd55e     | Col7a1             | LOC666466 /// Obox2      |
| Pcdh10          | Tet1          | C030018P15Rik   | Pttg1              | 9830134C10Rik            |
| Cttn            | Hpgd          | Srxn1           | 1700010114Rik      | Zbtb16                   |
| Ptgfrn          | Hpgd          | D4Erttd117e     | Hspa1l             | Lox                      |
| Qtrtd1          | Rnf20         | C80678          | Ghrh               | Spn                      |
| Axin2           | Tmed7         | Deptor          | 2310057J18Rik///23 | Laptm5                   |
| []              | []            | Slc35a5         | Mbp                | C230078M08Rik            |
| Lrat            | Lrig1         | Arhgef25        | Nkain1             | Ptgfr                    |
| Tex9            | D15Erttd55e   | Rab3il1         | Nkain1             | E2f1                     |
| Frk             | []            | Anapc16         | C920025E04Rik///H: | Ccl5                     |
| Mab2111         | Pdrg1         | Nsun5           | Ogn                | 4930570C03Rik            |
| Fxyd1           | C030018P15Rik | Xbp1            | Srr                | 2610018G03Rik            |
| Traf6           | D4Erttd117e   | Slu7            | Nupr1              | Ccnd2                    |
| Prlr            | Zfand3        | C78859          | Nupr1              | 4732474O15Rik            |
| Slc12a1         | C77144        | Mtfr1l          | Sgcb               | Tns4                     |
| Vipr2           | Deptor        | AA675344        | Prtn3              | Ccnd2                    |
| Xiap            | C77370        | Cd160           | Spock1             | D3Erttd258e              |
| Kcnmb1          | Slc35a5       | []              | Spock1             | LOC100044106 /// Plxnc1  |
| Pi15            | Slc35a5       | []              | Dpep1              | Cldn4                    |
| Msi1            | Arhgef25      | Fzd3            | Masp1              | Mlana                    |
| Pstpip2         | Map3k7        | D13Erttd205e    | Lats2              | Dmrt2                    |
| Elac1           | Rab3il1       | []              | Lats2              | Anpep                    |
| Ccr10           | Rab3il1       | Coprs           | Cep41              | Cpe /// LOC100046434     |
| Angpt11         | []            | Coprs           | Camp               | Sorl1                    |
| Hhip            | Nsun5         | Pttg1ip         | Colec12            | Loxl1                    |
| Arl10           | Xbp1          | AA517023        | St8sia1            | Nfia                     |
| Zfhx4           | Xbp1          | Spsb1           | Prom1              | Ehf                      |
| Grid2           | Aak1          | Tmem191c        | Col5a3             | Centb1 /// Tnk1          |
| Pcdhb14         | Aak1          | []              | Car5b              | Lrig1                    |
| Pcdhb14         | C80171        | Slc8a1          | Wnt6               | Mmp23                    |
| Wnt8b           | Slu7          | []              | Il3ra              | 9630041G16Rik            |
| Angpt1          | Chek1         | []              | Cd274              | Thbs1                    |
| Onecut1         | Fam73b        | Smarcd1         | Gp9                | Ahrr                     |
| Crb1            | []            | []              | Slc26a4            | 2310014G06Rik            |
| Lepre1          | Maf1          | Ccl6            | Daf2               | Ptgfr                    |
| Runx3           | Jmjd6         | []              | Tpm2               | Odz2                     |
| Zfp318          | Jmjd6         | 2610201A13Rik   | Pde6b              | Marveld2                 |
| Ugt2a1///Ugt2a2 | Mtfr1l        | 2610201A13Rik   | Abcd2              | Chmp4c /// LOC10004485-  |
| Egr3            | []            | Gpank1          | Slc22a27           | Dlx4                     |
| Rabgap1l        | Tktl1         | []              | Abcb1a             | Hist1h1e                 |
| Krtap4-2        | []            | Pitpnb          | Abcb1a             | Krt6a                    |
| Cep250          | []            | Clec4e          | Dnajc1             | Dnajc15                  |
| Kcns1           | []            | Slc12a8         | []                 | Slc35a2                  |
| Epha6           | []            | Adamts15        | AA516738           | Galnt1l                  |
| Gabrq           | Fgf4          | Gbx2            | Agap2              | Slc6a2                   |
| Hoxd3///Hoxd4   | Fzd3          | Cspp1           | AA672641           | Dock2                    |
| Zic4            | Zscan21       | Gdap10          | 2610019E17Rik///Ra | Rarres2                  |
| Fbxo4           | []            | Lhx5            | []                 | Centb1 /// LOC100045877  |
| Cdx4            | []            | Ptgfr           | Hdlbp              | Pde1b                    |
| Adrb3           | D13Erttd205e  | Lta             | Cog4               | Gata3                    |
| Grid1           | []            | Grk4            | Errfi1             | Gpc6 /// LOC100045283    |
| Hif3a           | Zfp334        | Sva             | Ksr1               | Areg                     |
| Evx2            | Zfp334        | Spesp1          | []                 | Fbln1                    |
| Cd46            | Coprs         | Sntb2           | Krt72              | Hlf                      |
| Ncam2           | Coprs         | Kif3a           | Gm2682             | Pde7b                    |
| Ncam2           | []            | St8sia2         | []                 | LOC640441 /// Thbs1      |
| Cx3cl1          | Tcta          | Slco1a1         | []                 | 6430704M03Rik            |
| H2afy2///H2afy3 | Pttg1ip       | Prss12          | []                 | Eln                      |
| Il5ra           | AA517023      | Zfp354a         | 2810449G22Rik      | Pycr1                    |
| Enah            | Slc6a6        | Pard3           | 2810449G22Rik      | Dlx4                     |
| Tmc1            | Spsb1         | Ramp3           | []                 | Tmtc2                    |
| Hapln1          | AA408954      | Peg12           | DXErttd223e        | Casp12 /// LOC100044205  |
| Sox17           | AA408954      | Tnfsf10         | Tet1               | Krtap17-1                |
| Msemb           | AA409749      | Sema3a          | Zc3h7a             | C2                       |

|                    |               |                |                   |                             |
|--------------------|---------------|----------------|-------------------|-----------------------------|
| Vcan               | AA511261      | Pcdhb21        | Hpgd              | Ptpn6                       |
| Enam               | Dntt          | Hypm           | Hpgd              | 1200016E24Rik               |
| Zfp59              | D11Ert326e    | Prdm1          | Fcrla             | Pcsk6                       |
| Scn3a              | Igll1         | Ager           | Mphosph9          | E2f2                        |
| Tmc2               | []            | Pcdhb3         | D15Ert55e         | Sfrp2                       |
| Vmn2r26            | []            | Rptn           | Gm12264           | Tmeff2                      |
| Nr5a1              | []            | Ppy            | C030018P15Rik     | Gpc6 /// LOC100045283       |
| Matk               | Slc8a1        | Rhox2a///Rhox2 | Tmem38b           | Igsf10                      |
| Fbxo17             | []            | Gm2083///Mup1  | C80678            | Klf14                       |
| Gpr132             | []            | 4933411G06Rik  | Tubb2a-ps2        | Cst7                        |
| Htr6               | AA414993      | Mtpn           | Slc35a5           | 2900076A13Rik               |
| Bmp10              | []            | Nap111         | Arhgef25          | Gylt1b                      |
| Vmn1r172           | []            | Stxbp1         | Creb3             | Ctsh                        |
| Pax5               | Smarcd1       | Dkk2           | Gba2              | Hist1h2bb /// Hist1h2bc //  |
| Uchl4              | Glb1l         | Tmem47         | Rab3il1           | Cited2                      |
| Lmx1b              | Tubg2         | a              | Wwc1              | Spint1                      |
| Olf1r74            | Ccl6          | Eral1          | Xbp1              | LOC665506                   |
| Ang3               | D2Ert63e      | Ccdc50         | Xbp1              | Ung                         |
| Efna5              | Prph          | Masp2          | C80171            | Typr1                       |
| Uts2               | []            | Magi2          | Slu7              | Il10ra                      |
| Defb3              | []            | Gucy1a3        | []                | Plxnc1                      |
| Defb5              | 2610201A13Rik | Chrdl2         | []                | Hs6st2                      |
| Epdr1              | []            | Rit1           | Jmjd6             | Ccrl1                       |
| Bcl6               | Tap1          | Rdh16          | Jmjd6             | S100a16                     |
| Bace1              | Prss58        | Chn1           | Mtfr1l            | Ddc                         |
| Map1b              | Col9a3        | Knop1          | AA675344          | Pde7b                       |
| Fgl2               | Prss29        | Alx3           | []                | Pilrb1                      |
| Fgl2               | []            | Selp           | Tktl1             | Ctsh                        |
| S100a3             | []            | Shox2          | []                | Esrrg                       |
| Nr3c1              | []            | Chrne          | []                | Rgs4                        |
| Trim44             | Rep15         | Gria3          | []                | Cdca5                       |
| Sh3bgrl            | Clec4e        | AK009121       | Vmn2r103///Vmn2r1 | Rab25                       |
| Mapk9              | Slc12a8       | Chad           | Fgf4              | Tmcc3                       |
| Sos1               | Dmc1          | Hoxd1          | []                | Phactr1                     |
| St3gal2            | Cspp1         | Cd209e         | Zfp334            | Klhl13                      |
| Elk1               | Cldn14        | Zfp493         | Zfp334            | Lhfp12                      |
| Mr1                | Bpifa1        | Tpo            | []                | Pvrl4                       |
| Med29              | Lhx5          | Rbm18          | AA517858          | Opcml                       |
| Pdgfra             | Ptgfr         | Prkacb         | AA517023          | Mt1                         |
| Pdgfra             | Lce1a2        | Aes            | Spsb1             | Gucy1a3                     |
| Serpina3m          | Grk4          | Dnaja3         | AA409749          | Tnfrsf18                    |
| Sh3bp5             | Ninj2         | Bscl2          | D7Ert183e         | Mgl1                        |
| Sh3bp5             | Dkk1          | Sqrdl          | Igll1             | Klhl13                      |
| Slc2a3             | Bik           | Zfhx3          | Igll1             | Mcm5                        |
| Mapk11             | Csn2          | Zfhx3          | []                | Elov17                      |
| Tbl2               | Sntb2         | Doc2b          | Tmem191c          | Ercc6l                      |
| Adcy3              | Sntb2         | 4932438H23Rik  | Gadd45b           | Ucp2                        |
| Dnaaf1             | Kif3a         | Sgce           | []                | Fxyd6                       |
| Add2               | St8sia2       | Fgf10          | []                | Sbsn                        |
| Mmp19              | Zfp354a       | Il2ra          | []                | Casp14                      |
| Papss2             | Gfi1b         | Dach1          | []                | Mmp19                       |
| Papss2             | Sval1         | Srcin1         | []                | Dsg2                        |
| Papss2             | Ramp3         | Pparg          | Ankzf1            | Lpxn                        |
| Igfbp4             | Atp2b2        | Tex15          | Glb1l             | Pam                         |
| Eif2ak2            | Peg12         | Tcp11          | Tubg2             | Cntfr                       |
| Foxp2              | Nr5a2         | Pmfbbp1        | []                | Mapre2                      |
| Zfp319             | Sema3a        | Mzf1           | 2610201A13Rik     | Chrdl1                      |
| Fli1               | Pcdhb21       | Lce1i          | 2610201A13Rik     | Hoxc13                      |
| Atp6v0a4           | Hypm          | Ppp3cc         | Samhd1            | Cdcp1                       |
| Zfand6             | Prdm1         | Adat1          | Prss58            | Sptlc3                      |
| Gjc3               | Pcdhb3        | 1110006O24Rik  | Prss29            | Fn1                         |
| Inhba              | Cldn16        | Gm10228        | Gpank1            | Slc4a4                      |
| Cbx2               | 1700011A15Rik | 5830411J07Rik  | []                | Ptprc                       |
| Akr1c20            | Orm2          | Tsc22d3        | []                | Stxbp6                      |
| Zbtb20             | Ppy           | Hdhd1a         | []                | Pstpip2                     |
| Gstm6              | Slc16a8       | Ahrr           | []                | Efna5                       |
| Ky                 | Sult1e1       | Hdac7          | Clec4e            | Ppl                         |
| Nfya               | Krtap5-2      | Gdi2           | Txndc8            | A130010J15Rik               |
| Bmx                | Crygs         | Ywhag          | Slc12a8           | LOC100045677 /// Mcm3       |
| Stat5b             | Gcm2          | Ywhaq          | Adamts15          | F3                          |
| Spn                | Il1rap12      | Vamp2          | Gbx2              | Ror1                        |
| LOC102643033       | Gm2083///Mup1 | Ntrk2          | Tmco5             | 4930562D21Rik               |
| Sema5b             | Muc1l         | Plekha3        | Gdap10            | Tmem40                      |
| Foxo4              | Cnnm3         | Plekha3        | Asb12             | Gm428                       |
| Hmx1               | Vtn           | Sufu           | Ptgfr             | Bnc2                        |
| Hist1h3b///Hist1h3 | Dab2          | B3gnt2         | Prss22            | Gpr177                      |
| Itgb1bp1           | Stxbp1        | Lanc12         | Lta               | Rbm35b                      |
| H2-T24             | Dkk2          | Zbtb14         | Grk4              | Angptl2                     |
| Siglec1            | Tmem47        | Gm21540///Tme  | Krtap13           | Ccr5                        |
| Pou3f4             | a             | Gm21540///Tme  | Spesp1            | Hmga2                       |
| Bdnf               | Ccdc50        | Gucy1b3        | Csn2              | Klk7                        |
| Slc5a3             | Ccdc50        | Gm4887///Twf1  | Sntb2             | Lipg                        |
| 2810408B13Rik      | Dcbld2        | Sep-06         | Gna14             | Tslp                        |
| Pdx1               | Dpf1          | Ywhab          | Prss12            | Dyrk3                       |
| Tpsb2              | Gucy1a3       | Acid           | Ubl4b             | Lad1                        |
| Hnf4g              | Crybb2        | Xbp1           | Gp49a///Lilrb4    | Hist1h4a /// Hist1h4b /// t |
| C5ar1              | Chrdl2        | Tgfbr1         | Ramp3             | Stard10                     |
| H2-Ob///LOC10263   | Chn1          | Rab18          | Atp2b2            | Cybb                        |
| Avpr1b             | Epha5         | Hk1            | Peg12             | Il2rb                       |
| B3galt1            | Selp          | St6galnac3     | Abcc9             | Tyrobp                      |
| Gnb5               | Shox2         | Il17ra         | Krt35             | B930041F14Rik               |
| Foxh1              | Chrne         | Mfge8          | Tnfsf10           | Hist1h2ab /// Hist1h2ac //  |
| Hand2              | Slurp1        | Usp9x          | Sema3a            | St6galnac3                  |
| Usp17lc///Usp17ld  | AK009121      | Timp2          | Sema3a            | Sirpa                       |
| Fgf7               | Prkd3         | St6gal1        | Syt2              | Pak6                        |
| []                 | Chad          | Hs6st2         | Otof              | LOC100038947 /// LOC66E     |
| Ccr5               | Prl6a1        | Rgs5           | Pcdhb21           | Vtn                         |
| P2ry4              | Hoxd1         | Rgs5           | Tcl1b4            | Dock10                      |
| Gira1              | Aicda         | Atrx           | Prdm1             | Ahr                         |
| Drd3               | Cftr          | Znrf1          | Ager              | Lamb3                       |
| Sstr4              | 4930429B21Rik | Son            | Pcdhb3            | Ahr                         |
| Ctsq               | Zfp493        | Add1           | Cldn16            | Ear2                        |



|                   |                 |               |                    |                          |
|-------------------|-----------------|---------------|--------------------|--------------------------|
| Nog               | Tsga13          | Add1          | Orm2               | Dscam                    |
| Ftl1///Gm20746/// | Cacng2          | Fancg         | Pcdhb19            | Ret                      |
| Lcn4              | Defa-rs2        | Hapln2        | Sult1e1            | LOC100047803 /// Ntsr1   |
| Flad1///Lenep     | Raet1a///Raet1b | Enc1          | Tac4               | AA407782                 |
| Il1rl1            | Mtag2           | Enc1          | Ripply3            | Gpr177                   |
| Ntrk3             | Rbm18           | Nacc1         | Il1rapl2           | Nbl1                     |
| Actg2             | Prkacb          | Adcy7         | Gm2083///Mup1///I  | Adamts14                 |
| Olfr544           | Ptp4a2          | Man1a2        | 4933411G06Rik      | Klk11                    |
| Magea6            | Aes             | Plxna3        | Vtn                | Spp2                     |
| Olfr672           | Csn1s1          | Angptl2       | Klk1b16            | Ppp2r2c                  |
| Tlm               | Dnaja3          | Mobp          | Stxbp1             | Chst12                   |
| Olfr68///Olfr69   | Bscl2           | Hsd17b11      | Dkk2               | Grhl2                    |
| Olfr71            | Jmy             | Srprb         | Tmem47             | Sgpp1                    |
| Vmn1r41           | Sqrdl           | Pitpnb        | a                  | Ehf                      |
| Olfr151///Olfr160 | Zfhx3           | Pole3         | Masp2              | Spint2                   |
| Olfr1509          | Zfhx3           | Ighmbp2       | Gpatch2            | Cap2                     |
| Vmn1r13           | Tgfb1           | Aaed1         | Crybb2             | E2f2                     |
| Vmn1r-ps8///Vmn1  | ltgb3bp         | Mef2c         | Chn1               | Nup210                   |
| Hist1h1e          | Doc2b           | Mef2c         | Aix3               | Rpl7                     |
| Sprr3             | Lce1a1          | Arhgef2       | Selp               | Dsg1b                    |
| H2-D4             | Cts8            | Mrc2          | Shox2              | Icos                     |
| Ferd3l            | Acox3           | Kif1a         | Chrne              | Il1f9                    |
| Magee1            | Sgce            | Jak2          | Insrr              | Chst2                    |
| Col5a2            | Fgf10           | Jak2          | AK009121           | Tuba4a                   |
| Tff2              | Il2ra           | Cyp7b1        | Stra8              | Gcet2                    |
| Rcn2              | Gpx5            | Nr4a3         | Aicda              | 4921521F21Rik            |
| Tcl1              | Clec7a          | Banf1         | Gpr143             | Csf2                     |
| Bnip3             | Folr4           | Banf1         | Nxf2               | Kif13a                   |
| Cdk20             | Csf2ra          | Banf1         | Zfp493             | Stxbp6                   |
| Mageh1            | Pparg           | Gpc4          | Tpo                | Ptgds2                   |
| Syt5              | Cd247           | Epb4.1l1      | Mtag2              | Pscdbp                   |
| Tnni3             | Tex15           | Zbtb33        | Csn1s1             | Txndc5                   |
| Extl2             | Tmlhe           | Trpc1         | 8430419L09Rik      | H2-Ab1 /// Rmcs2 /// Rmc |
| Fbln1             | Tmlhe           | Bhlhe41       | Bscl2              | Lrrc8e                   |
| Tbx2              | Cab39l          | Gm6910///Rybp | Sqrdl              | Tcfap2e                  |
| Arl2              | Cntn3           | Nkx2-2        | Sec61a2            | AU018091                 |
| Map6              | Lce1i           | Rtn4          | Tgfb1              | Ovol1                    |
| Pten              | Ppp3cc          | Cdk5r1        | Procr              | Hic1                     |
| Adamts5           | Gm10228         | Strbp         | Doc2b              | Map3k5                   |
| Rrad              | Dtx3            | Pvrl3         | Lce1a1             | Sirpa                    |
| Cr1l              | Chrnd           | Edn3          | Acox3              | Gfra2                    |
| Mxd4              | Klk4            | Atn1          | Sgce               | Thbs2                    |
| Rab3a             | Socs7           | Gnao1         | Fgf10              | Cd37                     |
| Ap3s1             | Dhx58           | Loxl4         | Il2ra              | Copz2                    |
| Nkain4            | Dhx58           | Hcn2          | Gpx5               | Gpc6 /// LOC100045283    |
| Rasgrf1           | Tsc22d3         | Atp11a        | Clec7a             | 4933417O08Rik            |
| Wnt5b             | Hdh1a           | Irf4          | Folr4              | Dsg2                     |
| Etv1///Gm5454     | Tas1r3          | Myt1l         | Csf2ra             | Rab3d                    |
| Igf2bp3           | Etos1           | Pbx3          | Csf2ra             | Fcer1g                   |
| Igf2bp3           | Trpd52l3        | Itgav         | Srcin1             | Tac1                     |
| Wdr54             | Gm10256///Gm1   | Nudt16        | Dao                | Cercam                   |
| Gm10058///Gm10    | 4933436l01Rik   | Abcc6         | Hpn                | Fermt3                   |
| Ppap2a            | Speer4f         | Ids           | Lbx2               | Itm2a                    |
| Ppap2a            | Otog            | Bco2          | Tex15              | Cdca8                    |
| Ly6h              | Pcdha1///Pcdha  | Slc4a4        | Tmlhe              | Al662270                 |
| Mmp16             | Npas1           | Rnf144a       | Tcp11              | Cd207                    |
| 1700020D05Rik     | Il13            | Cabp1         | Gabrr2             | 1810019J16Rik            |
| Vsig2             | Clec4d          | Ugcg          | Pmfbbp1            | C1s /// LOC100044326     |
| Pcdhb9            | Fgf16           | Dst           | Lce1i              | Ccnd2                    |
| Hfe               | Hdac7           | Spta1         | Ppp3cc             | Adh7                     |
| Sgca              | Vamp2           | Gabra1        | Gm10228            | Rprm                     |
| Plcz1             | Ntrk2           | Gabra1        | Dtx3               | Shmt1                    |
| Naalad2           | Plekha3         | Bmp5          | 5830411J07Rik      | LOC640441 /// Thbs1      |
| Prkd1             | Eln             | Pecam1        | 1700019G17Rik      | Arg2                     |
| Toporsl           | ltga9           | Cacna1c       | Sprr2d             | Dpp4                     |
| Zap70             | Gucy1b3         | Lef1          | Tsc22d3            | Chrdl1                   |
| Pmepa1            |                 | Sep-06 Rabep1 | Tas1r3             | Rarres2                  |
| Cacna1h           | Nsd1            | Mgmt          | Gm10256///Gm103    | Cit                      |
| Pnck              | Sln             | Pcdh10        | 4930433N12Rik      | Arhgap9                  |
| Ddr2              | Xbp1            | Cttn          | Ahrr               | Eln                      |
| Phka1             | Wnt7b           | Pla2g2f       | Pcdha1///Pcdha10// | Ccnd2                    |
| Bicd2             | Tgfb1           | Cend1         | Ntsr1              | Cd200r3                  |
| Zeb2              | St6galnac3      | Cend1         | Clec4d             | Tuba4a                   |
| Mapre1            | Vegfa           | Tgm3          | Myl10              | Creb5                    |
| Rad51d            | Ppap2c          | Tex9          | Hdac7              | A630033H20Rik            |
| Myt1              | Mfge8           | Frk           | Hdac7              | Sh3d19                   |
| Smpd3             | Cd151           | Clec5a        | Ntrk2              | Lgals12                  |
| Slc43a3           | St6gal1         | Fxyd1         | Ntrk2              | 5830405N20Rik            |
| Pafah1b2          | Srrm1           | S100a6        | Plekha3            | Vash1                    |
| Cacng1            | Rgs5            | Prlr          | Eln                | LOC100041195 /// LOC10C  |
| Cartpt            | Atrx            | Slc12a1       | ltga9              | Lbh /// LOC100048380     |
| Igfals            | Atrx            | Vipr2         | Gm21540///Tmed2    | 1100001G20Rik            |
| Fbn2              | Add1            | Pi15          | Gucy1b3            | Capns2                   |
| Neurog2           | Apc             | Zim1          | Gucy1b3            | Lama5                    |
| Agpat6            | Enc1            | Pstpip2       |                    | Sep-06 Svopl             |
| Trip4             | Slc25a15        | Ccr10         | Nsd1               | Dsc3                     |
| Col13a1           | Adcy7           | Sugct         | Sln                | Lbh                      |
| Hoxc4             | Polh            | Hhip          | Sez6               | Il13                     |
| Prg2              | 4933411K20Rik   | Arl10         | Xbp1               | Rassf5                   |
| Ctbp2             | Ankrd1          | Zfhx4         | Bcl2l1             | Gfra2                    |
| Pcdh18            | Cnot4           | Angpt1        | Wnt7b              | Btk                      |
| Pcdh18            | Cntrl           | Pgr           | Tgfb1              | Slc6a14                  |
| H2-Ea-ps          | Hsd17b11        | Lrp8          | Rab18              | Kbtbd10                  |
| Slc22a12          | Nrg3            | Lepre1        | St6galnac3         | Med12l                   |
| Fmo2              | Mef2c           | Nkx3-2        | Il17ra             | Slc35c2                  |
| Abcg2             | Mef2c           | Wnt2b         | Il17ra             | Gja1                     |
| Cbln3             | Magi3           | Stat5a        | Vegfa              | Mchr1                    |
| Bmp4              | Npas2           | Krtap4-2      | Ppap2c             | Camk2n2                  |
| Fgf3              | Mip             | Sp4           | Usp9x              | Ms4a4d                   |
| Tnfsf9            | Arhgef2         | Hoxd3///Hoxd4 | St6gal1            | Pde7b                    |
| Mc2r              | Arhgef2         | Zic4          | Mapk8              | Ccr5                     |
| Bcl2              | Mrc2            | Fbxo4         | Rgs5               | Hmga1 /// Hmga1-rs1      |

|                    |               |                  |                     |                         |
|--------------------|---------------|------------------|---------------------|-------------------------|
| Kif5c              | Lats2///Xpo4  | Syne1            | Rgs5                | Ppap2b                  |
| Hist1h4a///Hist1h4 | Alg2          | Pcdhb15          | Znrf1               | Stxbp2                  |
| Pcdhb4             | Snrpn///Snurf | Adrb3            | Asph                | Gfra2                   |
| Syt17              | Jak2          | Cntnap1          | Adcy7               | B930041F14Rik           |
| D1Pas1             | Phf2          | Ncam2            | Arid5b              | Tmed3                   |
| Rad23a             | Vhl           | Ncam2            | Arid5b              | Ccnd2                   |
| Agtrap             | Sertad3       | H2afy2///H2afy3  | Man1a2              | Cnnm1                   |
| Ar                 | Tcf23         | Rapgef4          | B3gnt5              | Cobl                    |
| Met                | Gpc4          | Zfy1///Zfy2      | Etv5                | LOC381765 /// LOC665506 |
| Bmf                | Trpc1         | Psg17            | Car6                | Espl1                   |
| Dgke               | Trpc1         | Cd1d2            | Rsad2               | Acpp                    |
| Spred2             | Stap1         | Tusc3            | Mobp                | Klc3                    |
| Pag1               | Ldb2          | Samt4            | Ranbp17             | Loh11cr2a               |
| Sec1               | Bmp2k         | Itpr2            | Gna12               | Mcpt-ps1                |
| Pcdhb6             | Gbp4///Gbp8   | Cdkn1a           | Mef2c               | Dock8                   |
| Gypa               | Cml2          | Krtap19-5        | Mef2c               | 4930570C03Rik           |
| Gjd2               | Strbp         | Agrp             | Kcnn4               | Cdh4                    |
| Tpm1               | Ryr2          | Vcan             | Mrc2                | Cdkn1c                  |
| Nsg1               | Zrsr2         | Zfp92            | Kif1a               | Il1rl1                  |
| Igfbp3             | Pvrl3         | Vmn1r171         | Dnase1l3            | 2310038H17Rik           |
| 6720475J19Rik      | Pvrl3         | Eya1             | Alg2                | Saa3                    |
| 6720475J19Rik      | Edn3          | Nr5a1            | Mllt1               | Nova1                   |
| Cmpk1              | Atn1          | Tpst1            | Snrpn///Snurf       | Cpne4                   |
| Gpm6b              | Gnao1         | Cyp3a16          | Jak2                | Lamc2                   |
| Incenp             | Hcn2          | Fbxo17           | Jak2                | Tgfb1                   |
| Col1a2             | Dsc2          | Lhx3             | Ptger4              | Crxos1                  |
| St6galnac6         | Myt1l         | Fcer1a           | Per3                | AA409316                |
| Aip                | Npcd///Nptxr  | Upk2             | Per3                | Cited2                  |
| Lipa               | Clec1b        | []               | Gpc4                | Pilra                   |
| Hes5               | Mettl7a1      | Egfbp2           | Slc7a10             | lfng                    |
| Dnajb11            | Ccr2          | Kcnab3           | Zbtb33              | Man2b1                  |
| Cfh                | Ccr2          | Efna5            | Trpc1               | Il7r                    |
| Sri                | Gabrb3        | Defb5            | Stap1               | Edar                    |
| Spred1             | Gopc          | Epdr1            | Ldb2                | Fzd5                    |
| Spred1             | Itga4         | Gsr              | Vamp3               | 9530053H05Rik           |
| Taf7               | Chrna4        | Set              | Mtdh                | Slc16a12                |
| Cetn1              | Chrna4        | Ppp2cb           | Nkx2-2              | Cdh3                    |
| Phc1               | Nudt16        | Ppp2cb           | Cdk5r1              | Rbm47                   |
| Cap2               | LOC102638292  | Bace1            | Ryr2                | Vapb                    |
| B4galt6            | Bche          | Ak4              | Pvrl3               | Gpr177                  |
| Nrgn               | Fip1l1        | Pip5k1b          | Pvrl3               | Mpl                     |
| Src                | Hnf1a         | Adat3///Scamp4   | Areg                | Krt28                   |
| Tgfb2              | Ptprt         | Il1rap           | Zfp386              | Vkorc1                  |
| Mpz                | Il6st         | Map1b            | Tial1               | Hopx                    |
| 1500015O10Rik      | Rnf144a       | Kcnk5            | Gnao1               | Mcm2                    |
| Coch               | Zfp40         | Fgl2             | Dsc2                | Tmem16j                 |
| Hyou1              | Ugcg          | Fgl2             | Cgnl1               | Tgfb1                   |
| Prx                | Socs4         | Clstn1           | Rfng                | Lif                     |
| Bbc3               | Gabra1        | Nr3c1            | Atp11a              | Sell                    |
| Pnn                | Pik3ap1       | Sh3bgrl          | Abcg3               | P2rx1                   |
| Rpl39l             | Atp4a         | Rab24            | Myt1l               | Gna14                   |
| Gdap1              | F2rl3         | Mrps23           | Mgat4c              | Plxna4                  |
| Pvrl3              | Cacna1c       | Elavl2           | Ttyh2               | 6720458F09Rik           |
| Sdcbp              | Lef1          | Sos1             | Higd1c///Mettl7a1// | Pcdh10                  |
| Ergic1             | Zic2          | Sos1             | Mettl7a1            | Col12a1                 |
| Sec23a             | Pcdh10        | Aplp2            | Ccr2                | Ebf2                    |
| Crispld1           | Cttt          | Aplp2            | Itga4               | B230120H23Rik           |
| Crispld1           | Lce1g         | Aplp2            | Ptpn11              | Ddah1                   |
| Cacna1g            | Mynn          | St3gal2          | Itgav               | Bace2                   |
| Laptm4a            | Egfl7         | St3gal2          | Nudt16              | Afap1                   |
| Nfatc4             | Extl3         | Elk1             | Ids                 | 2310010M24Rik           |
| Nfatc4             | Kcns2         | Eif2ak1          | Ttll3               | Nxph1                   |
| Agt                | Cend1         | Med29            | Bco2                | Egfr                    |
| Ugt2b38            | Pde7b         | Pdgfra           | Slc4a4              | Itm2a                   |
| Etv6               | Tex9          | Pdgfra           | Pknox1              | Fosl1                   |
| Timp4              | 4930549C01Rik | Anp32a           | Esr1                | Cxadr                   |
| Fbln2              | Mab21l1       | Sh3bp5           | Pax9                | Egfr                    |
| Ptgs1              | Fxyd1         | Sh3bp5           | Slc39a9             | Ace2                    |
| Pdia3              | S100a6        | Mapk11           | Btnl10              | 2610301F02Rik           |
| Zic3               | Zfp354b       | []               | Ugcg                | Tnfaip8                 |
| Ror2               | Insr          | Crp              | Bmp5                | 2310067E19Rik           |
| Gsta3              | Slc12a1       | Crkl             | Pik3ap1             | Vgll3                   |
| Slc46a2            | Vipr2         | L1cam            | F2rl3               | Cxcl14                  |
| Zic1               | Grin2d        | Adcy3            | Lef1                | Car13                   |
| Bicc1              | Pi15          | Nipa2            | Adarb2              | Fn3k                    |
| Sncaip             | Sema6a        | Mmp19            | Pcdh10              | Arhgap9                 |
| Brd2               | Elac1         | Hnf4a            | Cttt                | Trem1                   |
| Jam3               | Sugct         | Stc1             | Ptgfrn              | Osm                     |
| Tagln              | Rcan2         | Papss2           | Smyd1               | C030019I05Rik           |
| Nnat               | Hhip          | Igfbp4           | Hs3st3b1            | C86090                  |
| Iapp               | Slc5a7        | Igfbp4           | Map3k5              | Chchd6                  |
| Nid2               | Ptrf          | Hs1bp3           | Axin2               | Cmah                    |
| Aass               | Arl10         | Spry4            | []                  | Il1rn                   |
| Arid3b             | Zfhx4         | Fli1             | Prkg2               | Ccbe1                   |
| G6pc2              | Dnah5         | Ets1             | Tex9                | Cd3e                    |
| Stk32c             | Pcdhb14       | Dlx3             | Grk1                | Vgll3                   |
| Strn3              | Angpt1        | Tnfrsf22         | Frk                 | Ptgfr                   |
| Rbms2              | Flt4          | Gjc3             | Mab21l1             | Car3                    |
| Swap70             | Gpr110        | Tsc1             | Il1f5               | Minpp1                  |
| Zfp207             | Slc26a3       | Ndst1            | Fxyd1               | H2-Aa                   |
| Ggcx               | Onecut1       | Inhba            | Traf6               | Amigo1                  |
| Ifi44              | Ralgapa1      | Pex5             | Traf6               | Snhg7                   |
| Kcnc1              | Zfp108        | Zbtb20           | Col9a1              | Ptgfr                   |
| Gatm               | Samsn1        | Klrb1b           | Lyst                | Csf1                    |
| Abcg1              | Lrp8          | Bmx              | Kremen1             | Esr1                    |
| Ankrd36            | Mpl           | Stat5b           | Slc12a1             | Ndufb4                  |
| Igfbp7             | Lepre1        | Slc5a5           | Vipr2               | Irf4                    |
| Igfbp7             | Runx3         | Htr2b            | Grin2d              | Adi1                    |
| Zfpm1              | Stat5a        | Dhh              | Xiap                | Col25a1                 |
| Itm2a              | Cant1         | Mgat3            | Kcnmb1              |                         |
| Alpl               | Zfp318        | Foxo4            | []                  |                         |
| Lrrc8c             | Zfp318        | Hist1h3b///Hist1 | Msi1                |                         |

|                   |                 |                 |                   |
|-------------------|-----------------|-----------------|-------------------|
| Rasd1             | Ttbk2           | Sh3pxd2a        | Elac1             |
| Pcdhga1///Pcdhga1 | Rabgap1l        | Pou3f4          | Ccr10             |
| Cygb              | 2010106E10Rik   | Sema5a          | Rcan2             |
| Gpr146            | Acer2           | Bdnf            | Zfmx4             |
| Bmp2              | Olftr78         | Slc5a3          | Grid2             |
| Zdhhc3            | Sorcs1          | Mmp1a           | Pcdhb14           |
| Col1a1            | Naip5           | Ak1             | Wnt8b             |
| Tmem246           | Pde4a           | Htr5a           | Angpt1            |
| Fads1             | Kcnd1           | B3gnt3          | Slc26a3           |
| Aars              | Zic4            | Npffr2          | Prkcg             |
| Gpsm1             | Mef2b           | Hand2           | Onecut1           |
| Gpsm1             | Fbxo4           | Cyp2a4///Cyp2a4 | Ralgapa1          |
| Ak3               | Syne1           | Htr7            | Crb1              |
| Zwint             | Cd180           | Fgf7            | Jph2              |
| Bambi             | Pcdhb2          | Irs4            | Samsn1            |
| Igfbp4            | Epm2a           | Ccr5            | Lepre1            |
| Athl1             | T2              | Klf9            | Runx3             |
| Unc93b1           | Cd209c          | A030005K14Rik   | Stat5a            |
| Ddx41             | Serpina3c       | Sike1           | Ugt2a1///Ugt2a2   |
| Cxx1a///Cxx1b     | Pet2            | Nog             | Egr3              |
| Zfp503            | Grid1           | Ftl1///Gm20746  | Rabgap1l          |
| Rasl11b           | 4930524B15Rik   | Lcn4            | Prmp5             |
| Slc44a1           | Evx2            | Ifnb1           | Hpgds             |
| Gypc              | Cntnap1         | Neurog3         | Acer2             |
| D030056L22Rik     | Kcnj6           | G6pd2///G6pdx   | 2010204K13Rik     |
| Lamc1             | Ncam2           | Gja10           | Mixl1             |
| Celf2             | Ncam2           | Ntrk3           | Cep250            |
| Rnf187            | Fam184b         | Olftr155        | Epha6             |
| Tmem176a          | Shbg            | Fpr-rs3         | Txnrd1            |
| Aspscr1           | Ceacam2         | Magea6          | Dfna5             |
| Olfml2b           | H2afy2///H2afy3 | Olftr672        | Pde4a             |
| Pkig              | Myo1f           | Vmn1r40         | Hoxd3///Hoxd4     |
| Kcnab3            | Il5ra           | []              | Zic4              |
| C3                | Zfy1///Zfy2     | Vmn1r25         | Syne1             |
| Cers2             | Pcdhb1          | Vmn1r13         | Pcdhb2            |
| Ropn1l            | Hapln1          | Vmn1r15         | Pcdhb15           |
| Meis3             | Capn8           | Rab23           | Trim34a///Trim34b |
| Gdf10             | Tbc1d8b         | Hes3            | Ifi202b           |
| Gm3470///Rbpms2   | Cysltr2         | Defa4           | Adrb3             |
| Mfap4             | Cemip           | Magee1          | Serpina3c         |
| Arl6ip6           | Htr3b           | Col5a2          | Grid1             |
| Ginm1             | Psg18           | Ins1            | Ly6c1///Ly6c2     |
| Ginm1             | Adra1a          | Rcn2            | Hif3a             |
| Tspsy4            | Scn9a           | Tcl1            | Rap2a             |
| Hvcn1             | Fpr3            | Ppt1            | Cntnap1           |
| C1s1              | Hsd17b3         | Acss2           | Mrgprh            |
| Fgfr1             | []              | Acss2           | Ncam2             |
| Col4a2            | Cdkn1a          | Bnip2           | Ncam2             |
| Manbal            | Nrg4            | Cdk20           | Trim26            |
| Urm1              | Gm3417///Gm3417 | Mageh1          | Gsx2              |
| Oaf               | Clec4b1         | Aebp1           | Vgll1             |
| Tcf4              | Krtap21-1       | Fibp            | Kcnh3             |
| Gpx8              | Vcan            | Znrd1           | Tmc1              |
| Cend1             | Pkhd1l1         | Casq2           | Zfy1///Zfy2       |
| Jkamp             | Tex16           | Cyp51           | Hapln1            |
| Igf2r             | Vmn2r10         | Id2             | Tbc1d8b           |
| Lamb1             | Zfp92           | Extl2           | 1700082M22Rik     |
| Lamb1             | Sele            | Fbln1           | Ikzf2             |
| Kcnk13            | Vmn1r58         | Arl2            | Cd1d2             |
| Ptrf              | Pcdhb18         | Map6            | Scn9a             |
| Col6a3            | Eya1            | Pten            | Il17a             |
| Tmem98            | Tpst1           | Gamt            | []                |
| Fabp4             | St8sia5         | Mcg1038069///L  | Cdkn1a            |
| Ccdc80            | Matk            | Adamts5         | Msemb             |
| Ccdc80            | Fbxo17          | Nfic            | Cacna1e           |
| Tmem41a           | Kcnj5           | Atxn10          | Vcan              |
| Parm1             | Bmp10           | Rab3b           | Strc              |
| Asb8              | Adk             | Skiv2l          | Zfp59             |
| Meox2             | Homer1          | Rab3a           | Zfp92             |
| Meox2             | Olftr74         | Ap3s1           | Sele              |
| Fam65a            | Upk2            | Nkain4          | Vmn1r58           |
| Ces2c///Ces2d-ps  | Uevld           | Rasgrf1         | Arnt              |
| Ifitm1            | Kcnab3          | Wnt5b           | Vmn1r171          |
| Slc12a1           | Fgf11           | Ppp1r1a         | Ap4b1             |
| Aif1l             | Klrc3           | Etv1///Gm5454   | Eya1              |
| Dclk1             | Uts2            | Arpp19          | Nr5a1             |
| Dclk1             | Epdr1           | Ppap2a          | Matk              |
| Tmem55a           | Bcl6            | Ppap2a          | Fbxo17            |
| Esco1             | Ppp2cb          | Nos3            | Lhx3              |
| Tspan17           | Bace1           | Mmp16           | Bmp10             |
| Snx15             | Abca1           | 1700020D05Rik   | Vmn1r172          |
| Pcdha1///Pcdha10  | Golph3          | Pcdhb9          | Pax5              |
| Lpgat1            | Map1b           | Hfe             | Lmx1b             |
| Lpgat1            | Fgl2            | Slc7a2          | Etv2              |
| Ube2e2            | Fgl2            | Adipoq          | Upk2              |
| Ppapdc3           | S100a3          | Ptch2           | Ang3              |
| Mycbpap           | Nr3c1           | Serpib9b        | Fgf11             |
| Psmf1             | Nr3c1           | Naalad2         | Uts2              |
| Psmf1             | Sh3bgrl         | Prkd1           | Defb3             |
| Psmf1             | Sos1            | Crygb///Crygc   | Defb5             |
| Armxc3            | Sos1            | Ctr9            | Psap              |
| Rcn3              | St3gal2         | Ttyh1           | Bcl6              |
| Selm              | St3gal2         | Ttyh1           | Bace1             |
| Asrgl1            | St3gal2         | Pmepa1          | Twsg1             |
| Cbx6              | Tgs1            | Pmepa1          | Il1rap            |
| Spon1             | Tcf20           | Cacna1h         | Il1rap            |
| Csgalnact2        | Mrpl19          | Pnck            | Map1b             |
| Msrp2             | Pdgfra          | Acp1            | Kcnk5             |
| Abcg4             | Pdgfra          | Ap3s2           | Fgl2              |
| Mrps6             | Ccr9            | Pcdhb10         | Fgl2              |
| Tm6sf1            | Serpina3m       | Bbx             | Nr3c1             |
| Gprc5c            | Sh3bp5          | Phka1           | Pnlip             |

|          |                              |                  |                                         |
|----------|------------------------------|------------------|-----------------------------------------|
| Acaa1b   | Sh3bp5                       | Zeb2             | Trim44                                  |
| Lpcat1   | Tbl2                         | Zmynd10          | Sh3bgrl                                 |
| Phldb1   | Camk4                        | Chst2            | Rab24                                   |
| Phldb1   | Lhx1                         | Gipc1            | Rab24                                   |
| Camkk2   | Capn6                        | Syncrip          | St3gal2                                 |
| Camkk2   | Crkl                         | Smad6            | St3gal2                                 |
| Camkk2   | Nedd4                        | 1700088E04Rik    | St3gal2                                 |
| Cst8     | L1cam                        | Tlr3             | Mr1                                     |
| Angptl3  | Dnajb5                       | Slc43a3          | Pdgfra                                  |
| Txnrd1   | Gria2                        | Pafah1b2         | Pdgfra                                  |
| Txnrd1   | Mmp19                        | Pafah1b2         | Ccr9                                    |
| Zfp428   | Phex                         | Prep             | Serpina3m                               |
| Ugt3a1   | Kcnc3                        | Prrc2a           | Sh3bp5                                  |
| Atl3     | Hnf4a                        | Arf5             | Sh3bp5                                  |
| Oit1     | Papss2                       | Zfp191           | Tbl2                                    |
| Zfp768   | Papss2                       | Fbn2             | Camk4                                   |
| Dram1    | Igfbp4                       | Kcnd2            | Pcyt1a                                  |
| Mmd2     | Hs1bp3                       | Kcnd2            | Adcy3                                   |
| Oas1e    | Tfap2a                       | Agpat6           | Adcy3                                   |
| S100a4   | Mxd1                         | Rbp2             | Dnaaf1                                  |
| Nck1     | Cxcr5                        | Trip4            | Add2                                    |
| Zfyve27  | D730048I06Rik                | Col13a1          | Mmp19                                   |
| Pycr1    | Clec4a2                      | Hoxc4            | Mmp19                                   |
| Slc25a4  | Foxp2                        | Pcdhb12          | Kcnc3                                   |
| Slc25a4  | Spry4                        | Syt12            | Kcnc3                                   |
| Stac2    | Zfp319                       | Snrpd3           | Papss2                                  |
| Srgap3   | Fli1                         | Ctbp2            | Igfbp4                                  |
| Samd4    | Atp6v0a4                     | Rnf5             | Igfbp4                                  |
| Lmcd1    | Strn                         | Pcdh18           | Akr1c12                                 |
| Fgl1     | Dlx3                         | Pcdh18           | D730048I06Rik                           |
| Aoc1     | Tnfrsf22                     | Sfmbt1           | Crhr2                                   |
| Sumf1    | Sema7a                       | Slc22a12         | Spry4                                   |
| Gprc5b   | Gjc3                         | Bmp4             | Spry4                                   |
| Tceal1   | Cdh8                         | Tnfsf9           | Fli1                                    |
| Ift27    | Inhba                        | Mc2r             | Ets1                                    |
| Pdia5    | Mid1                         | Bcl2             | Cntf///Zfp91///Zfp91Cntf                |
| Acp2     | Ntn3                         | Galr2            | Tnfrsf22                                |
| Acp2     | Nodal                        | Kif5c            | Gjc3                                    |
| Slit2    | Nodal                        | Pcdhb4           | Ndst1                                   |
| Crtc2    | Zbtb20                       | Sapcd1           | Itgam                                   |
| Plekhf1  | Klrb1b                       | Zfp60            | Cdh5                                    |
| Fam26e   | Mc1r                         | Syt17            | Cdh8                                    |
| Cacfd1   | Cdx2                         | Rnf114           | Inhba                                   |
| Cacfd1   | Acot4                        | Srd5a2           | Ntn3                                    |
| Gca      | Acot4                        | Sprr2i           | Akr1c20                                 |
| Tmem38b  | Il7                          | Rad23a           | Pex5                                    |
| Runx2    | Ky                           | Agtrap           | Zbtb20                                  |
| Calml4   | Bmx                          | Ip6k1            | Il7                                     |
| Tmem150a | Mycl                         | Kat2a            | Ky                                      |
| Ccr5     | Mycl                         | Mme              | Nfya                                    |
| Slc15a2  | Stat5b                       | Cybb             | Pfkfb2                                  |
| Rasgrf1  | Aff2                         | Ar               | Cmpk2                                   |
| Ap5m1    | Eaf2                         | Alyref///Alyref2 | 4933434I20Rik                           |
| Galnt11  | Fcer2a                       | Art2a-ps         | Acvr1b                                  |
| Ms4a7    | Apc2                         | Mecom            | Opr1                                    |
| BC018242 | Mgat3                        | Ifna2            | Stat5b                                  |
| Rsph9    | Hist1h3b///Hist1             | Stt3a            | Stat5b                                  |
| Sez6l    | Clstn2                       | Stx6             | Erf                                     |
| Cdh22    | H2-T24                       | Ncbp2            | Aff2                                    |
| Cald1    | Siglec1                      | Ncbp2            | Sync                                    |
| Cald1    | Pou3f4                       | Tpm1             | Eaf2                                    |
| Cald1    | Sema5a                       | Hnrnpu           | Fcer2a                                  |
| Reep3    | Bdnf                         | Arf4             | Htr2b                                   |
| Reep3    | Slc5a3                       | Igfbp3           | LOC102643033                            |
| Reep3    | 2810408B13Rik                | Cdk5rap3         | Plau                                    |
| Pitx2    | Pdx1                         | Msmo1            | Csprs///Gm15433///Gm2666///Gm7609///LOC |
| Lama4    | Hnf4g                        | Der1             | Akap7                                   |
| Lama4    | Ak1                          | B3galt2          | Inhbe                                   |
| Tasp1    | B3galt1                      | Prickle4///Tomr  | Pla2g6                                  |
| Alg12    | B3gnt3                       | Gpm6b            | Hmx1                                    |
| Slain1   | Hand2                        | Paqr4            | Itgb1bp1                                |
| Ncmap    | Grin2b                       | Col1a2           | Clstn2                                  |
| Mef2c    | I54                          | Ube2d3           | Sh3pxd2a                                |
| Ptprd    | Klf12                        | St6galnac6       | Pou3f4                                  |
| Rab13    | Usp17lc///Usp17              | Impa1            | Sema5a                                  |
| Kdm5d    | Mc3r                         | Aip              | Slc5a3                                  |
| Kif12    | Hoxd13                       | Cwc15            | Fgf23                                   |
| Wipi1    | Fgf7                         | Lipa             | Tpsb2                                   |
| Bst2     | Mrvi1                        | Dnajb11          | Hnf4g                                   |
| Gdap1l1  | Irs4                         | Cfh              | Ak1                                     |
| Steap1   | Map3k2                       | Gnpnat1          | C5ar1                                   |
| BC021614 | []                           | Spred1           | B3galt1                                 |
| Pip5k1c  | Kcna4                        | Spred1           | Gnb5                                    |
| Car8     | Chrm3                        | Gpr137b///Gpr1   | Foxd3                                   |
| Upp2     | Msh3                         | Mta2             | Foxh1                                   |
| Purg     | Lhx6                         | Cd36             | Hand2                                   |
| Cyp3a25  | Klf9                         | Lgi1             | Grin2b                                  |
| Ppp1r42  | Mycs                         | Tiam2            | Ttc39d                                  |
| Odf4     | Foxb2                        | Tmem167          | []                                      |
| Glyctk   | Il6ra                        | Phc1             | Fgf7                                    |
| Tcte2    | Mmp1b                        | Spes2            | Pkdrej                                  |
| Tpm2     | Drd3                         | Mrpl49           | Kcna4                                   |
| Dnmt3l   | Gzmk                         | Cap2             | Ccr5                                    |
| Bpifb5   | Otp                          | Tctn2            | Klf9                                    |
| Ppp6r2   | Phxr2                        | B4galt6          | Phxr4                                   |
| Ppp6r2   | Xcr1                         | Cebpd            | Mmp1b                                   |
| Pbld1    | Mecom                        | Tgfb2            | Gja8                                    |
| Wasf3    | Krtap28-13                   | Mpz              | Gira1                                   |
| Ntrk3    | Ftl1///Gm20746,1500015O10Rik |                  | Drd3                                    |
| Ntrk3    | Ftl1///Gm20746,Minpp1        |                  | Sstr4                                   |
| Skp2     | Lcn4                         | Nedd4l           | Nkx2-9                                  |
| Gatad2b  | Igfbp5                       | Ints6            | Ctsq                                    |

|                 |                  |                 |                                                 |
|-----------------|------------------|-----------------|-------------------------------------------------|
| Tm6sf2          | []               | Slc34a1         | Pfdn5                                           |
| Zfp286          | Lbx1             | Stmn2           | Lcn4                                            |
| Zfp286          | Ntrk3            | Coch            | Flad1///Lenep                                   |
| Kcnc4           | Ifna11           | Hyou1           | Igfbp5                                          |
| Wars            | Cyp21a1          | Mest            | Clcn6                                           |
| Rnf183          | Gja3             | Tmem39a         | Gp1ba                                           |
| Ncam1           | Nkx2-1           | Myadm           | Il1rl1                                          |
| Ptpn5           | Npy6r            | Pnn             | Sf1                                             |
| Klk1b11         | Olfr544          | Entpd1          | Lbx1                                            |
| Acnat2          | Olfr672          | Rpl39l          | G6pd2///G6pdx                                   |
| Gbp7            | Tlm              | Pvrl3           | Gja10                                           |
| Golt1a          | Olfr17           | Sdcbp           | Ntrk3                                           |
| Rorb            | Olfr66           | Ergic1          | Actg2                                           |
| C1ql3           | Vmn1r50          | Ergic1          | Nkx2-1                                          |
| Sgip1           | Vmn1r44          | Orc4            | Pou4f3                                          |
| Sgip1           | Olfr151///Olfr16 | Cspg4           | Olfr544                                         |
| Lmbrd1          | Olfr1509         | Fzd8            | Olfr690                                         |
| Phospho2        | Vmn1r29          | Socs5           | Olfr68///Olfr69                                 |
| Lbh             | Tas2r105         | Crispld1        | Olfr49                                          |
| Slc22a29        | Vmn1r-ps8///Vnr  | Crispld1        | Olfr15                                          |
| 2210407C18Rik   | Spr3             | Lipt2           | Vmn1r41                                         |
| Krtap6-5        | H2-D4            | Sort1           | Olfr151///Olfr160                               |
| Theg            | Ifna4            | Cacna1g         | []                                              |
| Acot5           | Ferd3l           | Laptm4a         | Tas2r105                                        |
| Pear1           | Ear3             | Csnk1g2         | Rab23                                           |
| Pear1           | Defa4            | Nfatc4          | Ifna1///Ifna12///Ifna15///Ifna16///Ifna5///Ifna |
| Psmc3ip         | Magee1           | Nfatc4          | Ferd3l                                          |
| Crygn           | 2210010C04Rik    | Akr1cl          | Ear1///Ear12///Ear2///Ear3                      |
| Zcchc18         | Col5a2           | Ap1g1           | Magee1                                          |
| Rgs3            | Tff2             | Tsnax           | 2210010C04Rik                                   |
| Ncam2           | Rcn2             | Agt             | 2210010C04Rik                                   |
| Prima1          | Tcl1             | Gkn1            | Col5a2                                          |
| BC027072        | Acss2            | Fbln2           | Ins1                                            |
| Trim31          | Acss2            | Chtop           | Rcn2                                            |
| Col26a1         | Mageh1           | Asb4            | Tcl1                                            |
| Tmem116         | Pate4            | Pdia3           | Mad2l1                                          |
| Gm13271///Gm132 | Prph             | Zic3            | Acss2                                           |
| Cd8a            | Syt5             | Ror2            | Cdk20                                           |
| Srprb           | Cyp51            | Gsta3           | Mageh1                                          |
| Myef2           | Extl2            | Pck1            | Ctdspl                                          |
| Tdpoz1          | Ptprm            | Dapk3           | Aebp1                                           |
| Hgf             | Ropn1            | Rab11b          | Cyp51                                           |
| Adam26a         | Tbx2             | Hs3st1          | Extl2                                           |
| Cpsf4l          | Map6             | Slc35a5         | Fbln1                                           |
| Dnm3            | Zkscan3          | Knstrn          | Ptprm                                           |
| 2610034M16Rik   | Pten             | Cnnm2           | Tbx2                                            |
| Nlrp3           | Adamts5          | Zic1            | Rprm                                            |
| Slc1a1          | Rrad             | Bicc1           | Pten                                            |
| Glis1           | Fam129a          | Nfix            | Adamts5                                         |
| Wif1            | Mxd4             | Igdcc3          | Rrad                                            |
| Mef2a           | Myl4             | Sncaip          | Nfic                                            |
| Krtap16-3       | Lep              | Jam3            | Thbs2                                           |
| Msr1            | Rab3b            | Tagln           | Ampd3                                           |
| []              | Odf1             | Nnat            | Ap3s1                                           |
| Slc41a3         | Rab3a            | Sirt2           | Rasgrf1                                         |
| Oscar           | Ap3s1            | AW209491        | Serpib9                                         |
| Klra12          | Nkain4           | Nid2            | Wnt5b                                           |
| Il12a           | Rasgrf1          | Csk             | Etv1///Gm5454                                   |
| Churc1          | Wnt5b            | Aass            | Igf2bp3                                         |
| Grb10           | Etv1///Gm5454    | Ccer1           | Ly6h                                            |
| Plp1            | Igf2bp3          | Bcas3           | Mmp16                                           |
| []              | Ppap2a           | Strn3           | 1700020D05Rik                                   |
| Slu7            | Ppap2a           | Rbms2           | Vsig2                                           |
| Slu7            | Ly6h             | Swap70          | Calcb                                           |
| Mylk            | Mmp16            | Zfp207          | Pcdhb9                                          |
| Mark1           | 1700020D05Rik    | Ergic3          | Hfe                                             |
| Pik3r1          | Pcdhb9           | Slc1a4          | Slc7a2                                          |
| P2rx4           | Dok5             | Leprtl1         | Cntn6                                           |
| Prrx1           | Sh3bgr           | Dnajb3          | Sgca                                            |
| Prrx1           | Hfe              | Ggcx            | Ptch2                                           |
| Bin1            | Cryga            | Hsph1           | Plcz1                                           |
| Otc             | Plcz1            | Gatm            | Camk2d                                          |
| Plekha5         | Serpib9b         | Srd5a3          | Naalad2                                         |
| Plekha5         | Naalad2          | Fhl4            | Ctr9                                            |
| Lst1            | Prkd1            | Dmrt1           | Ctr9                                            |
| Pcdh10          | Ctr9             | Igfbp7          | Toporsl                                         |
| Epha3           | Irak1bp1         | Igfbp7          | Sptlc1                                          |
| Epha3           | Pmepa1           | Axl             | Ttyh1                                           |
| Galnt7          | Cacna1h          | Exosc10         | Zap70                                           |
| []              | Pnck             | Ednrb           | Pmepa1                                          |
| Mlph            | Stra6            | Itm2a           | Pmepa1                                          |
| Lamc3           | Mak              | Alpl            | Cacna1h                                         |
| Al317395        | Pcdhb10          | Lrrc8c          | Isl1                                            |
| Plcb1           | Ddr2             | Rasd1           | Stra6                                           |
| Tmem176a        | []               | Pcdhga1///Pcdhg | Speer4a                                         |
| Ncf1            | Bbx              | Cygb            | Inha                                            |
| Trim35          | Phka1            | Bmp2            | Ddr2                                            |
| Edil3           | Zeb2             | Aco1            | Tnfrsf21                                        |
| Epm2aip1        | Zmynd10          | Zdhhc3          | Phka1                                           |
| Nol6            | Tle1             | Pdia6           | Phka1                                           |
| Gypa            | Chst2            | Cdipt           | Bicd2                                           |
| Lepr            | Padi4            | Col1a1          | Zeb2                                            |
| Nmrk1           | Smad6            | Ttc30b          | Tle1                                            |
| Trim60          | 1700088E04Rik    | Ldoc1l          | Slc5a4b                                         |
| Slc39a14        | Slc43a3          | Usp1            | Bysl                                            |
| Rbpms           | Nppc             | Tmem246         | Tlr3                                            |
| Cdad1           | Prrc2a           | Fads1           | Slc43a3                                         |
| Cdad1           | Rims2            | Cmtr1           | Aldh1a2                                         |
| Klh20           | Cacng1           | Aars            | Ing3                                            |
| Rfxank          | Mutyh            | Gpsm1           | Cartpt                                          |
| Akr1b10         | Lipe             | Gpsm1           | Igfals                                          |
| Akr1b10         | Igfals           | Psm6            | Drd4                                            |

|                   |                |               |                                               |
|-------------------|----------------|---------------|-----------------------------------------------|
| B3gat1            | Drd4           | H1f0          | Kcnd2                                         |
| Tbx5              | Fbn2           | Pla2g15       | Kcnd2                                         |
| Nxn1              | Kcnd2          | Pgd           | Pabpn1                                        |
| Rgs3              | Agpat6         | Farsb         | Col13a1                                       |
| Enpp5             | Hmga2          | Dlst          | Gda                                           |
| BC025446          | Col13a1        | Abcb8         | Hoxc4                                         |
| Ppp2r5c           | Pcdhb12        | Ak3           | Kcnj12                                        |
| Cldn19            | Clk4           | Tpm1          | Bmpr1b                                        |
| Suv420h1          | Ctbp2          | Zwint         | Prg2                                          |
| Stxbp6            | Pcdh18         | Cnih1         | Capn9                                         |
| Impg1             | Pcdh18         | Snap47        | Sypl                                          |
| Pitpnm1           | Slc22a12       | Txndc5        | Clk4                                          |
| A730028G07Rik     | Ly86           | Bambi         | Ctbp2                                         |
| Tc2n              | Cbln3          | Igfbp4        | Pcdh18                                        |
| Fcrla             | Bmp4           | Igfbp4        | Pcdh18                                        |
| Usp12             | Gast           | Mettl13       | H2-Ea-ps                                      |
| Med21             | Tnfsf9         | Ath1          | Slc22a12                                      |
| Myocd             | Acot3          | Prkcdp        | Ly86                                          |
| Fabp4             | Mc2r           | Chchd6        | Fmo2                                          |
| Zfp287            | Icam4          | Nup133        | Abcg2                                         |
| Dtx1              | Fzd5           | Sf3a3         | Cbln3                                         |
| Eml6              | Bcl2           | Ddx41         | Bmp4                                          |
| Sorbs1            | Kif5c          | Cxx1a///Cxx1b | 1810009J06Rik///Gm2663                        |
| Limk1             | Hes7           | Noc4l         | Hrasls                                        |
| Slc26a7           | Ccr3           | Fam49b        | Tnfsf9                                        |
| Nek6              | Krtap5-4       | Gga1          | Mc2r                                          |
| Prlr              | Nat3           | Zfp503        | Bcl2                                          |
| Cacna2d1          | Rad23a         | Coa3          | Galr2                                         |
| Psen2             | Ip6k1          | Rnf41         | Hist1h4a///Hist1h4b///Hist1h4c///Hist1h4d///t |
| Lepr              | Nt5e           | Csdc2         | Hist1h4a///Hist1h4b///Hist1h4c///Hist1h4d///t |
| Lepr              | Mme            | Mphosph6      | Nos1                                          |
| Kcnab2            | Ar             | Rasl11b       | Pcdhb4                                        |
| Wnt9a             | Clip2          | Abcf2         | Fpr2                                          |
| Fbn1              | Esrrb          | Serpina3k     | Zfp60                                         |
| Itsn1             | Sgsh           | Gypc          | D1Pas1                                        |
| Sema6a            | Dmpk           | D030056L22Rik | Srd5a2                                        |
| Dnajc2            | Setd7          | Lamc1         | Agtrap                                        |
| Fgfr1             | Vipr1          | Telo2         | Mxd3                                          |
| Cep164            | Espn           | Celf2         | Cybb                                          |
| Spats2l           | Art2a-ps       | Hsbp1         | Ar                                            |
| Ifi44l            | Sec1           | Tmem176a      | Ntn1                                          |
| Atf5              | Sacs           | Aspscr1       | Met                                           |
| Xkr6              | Adra2a         | Hid1          | Pikfyve                                       |
| Mlx               | Sh2d1b1///Sh2d | Olfml2b       | Dgke                                          |
| Arntl2            | Stt3a          | Mlf2          | Pag1                                          |
| B4galt4           | Nsg1           | Slc35b2       | Setd7                                         |
| Gpm6b             | Igfbp3         | Hpx           | Vipr1                                         |
| Rad51d            | Dnmt3a         | C3            | Pim1                                          |
| Slc25a30          | B3galt2        | Cers2         | Sec1                                          |
| Speg              | Gpm6b          | Wdr26         | Syt7                                          |
| Ros1              | Col1a2         | Cd99l2        | Foxf1                                         |
| []                | St6galnac6     | Meis3         | Pcdhb6                                        |
| Myocd             | Rilpl2         | Abl1          | Gypa                                          |
| Masp1             | Lipa           | Pomk          | Hspe1-ps2///Hspe1-ps2                         |
| Dcun1d1           | Lipa           | Gdf10         | Adra2a                                        |
| Kcnma1            | Gtpbp4         | Gm3470///Rbpr | Hes2                                          |
| Nfatc2            | Cfh            | Mfap4         | Aplnr                                         |
| Kank2             | BC005537       | Dennd5a       | Prosc                                         |
| Slc6a5            | Sri            | Hint1         | Arf4                                          |
| Pign              | Gnpnat1        | Srsf7         | Arf4                                          |
| Oxtr              | Spred1         | Rora          | Nsg1                                          |
| Eomes             | Spred1         | Map7d1        | Igfbp3                                        |
| Ccar2             | Spred1         | C1s1          | Dnmt3a                                        |
| Tmpo              | Taf7           | Tmem5         | 6720475J19Rik                                 |
| Dbn1              | Tiam2          | Tmem242       | 6720475J19Rik                                 |
| Prpf6             | Gabarapl2      | Cyb5r1        | Snx9                                          |
| Serinc4           | Pspc1          | Fgfr1         | B3galt2                                       |
| Rgs16             | Cetn1          | Col4a2        | Gpm6b                                         |
| Tfap2a            | Phc1           | Tcf25         | Incenp                                        |
| Bcl2l1            | Ms4a1          | Btbd2         | Incenp                                        |
| Gem               | B4galt6        | Usp48         | Col1a2                                        |
| Trib3             | Inpp5e         | Manbal        | St6galnac6                                    |
| Kcnd3             | Inpp5e         | Rab1b         | Aip                                           |
| Cmklr1            | Itgb1bp2       | Tcta          | Thy1                                          |
| Cdc27             | Src            | Dcps          | Lipa                                          |
| Dio2              | Nktr           | Tbc1d13       | Lipa                                          |
| Fmr1              | Tgfb2          | Oaf           | Dnajb11                                       |
| Trim34a///Trim34b | Mpz            | Tcf4          | Cfh                                           |
| Hrh4              | Syt9           | Gpx8          | Spred1                                        |
| Slc19a2           | 1500015O10Rik  | Hnrnp1        | Spred1                                        |
| Rrbp1             | Polg           | Jkamp         | Spred1                                        |
| Prss44            | Ints6          | Glo1          | Cd36                                          |
| Park2             | Stmn2          | Igf2r         | Tnfrsf13b                                     |
| Klra21            | Stmn2          | Lamb1         | Cetn1                                         |
| Ackr4             | Coch           | Lamb1         | Tmem167                                       |
| Trdn              | Prx            | Ppp5c         | Phc1                                          |
| Gm21320///LOC10   | Add3           | Eya2          | B4galt6                                       |
| Cd209b            | Add3           | Ptrf          | Etv4                                          |
| []                | Hhex           | Col6a3        | Galnt1                                        |
| Mup5              | Pnn            | Tmem98        | Itgb1bp2                                      |
| Lat2              | Rpl39l         | Gdpd5         | Mpp1                                          |
| Cd209a            | Gdap1          | Sall4         | Cyp2c68                                       |
| Cacna2d2          | Pvrl3          | Tax1bp3       | Tgfb2                                         |
| Dusp15            | Cspg4          | Ccdc80        | 1500015O10Rik                                 |
| Igh-VJ558         | Barx1          | Ccdc80        | Stmn2                                         |
| Krtap19-4         | Sec23a         | Pigc          | Stmn2                                         |
| Tmem216           | Socs5          | Tmem41a       | Coch                                          |
| Ttc39c            | Crispld1       | Fam216a       | Hyou1                                         |
| Cmtm2a            | Crispld1       | Slc25a33      | Prx                                           |
| Kras              | Sort1          | Parm1         | Add3                                          |
| Bmp1              | Cacna1g        | Susd4         | Pde7a                                         |
| Mapre2            | Wnt7a          | Asb8          | Tmem39a                                       |

|                   |                      |                |                                            |
|-------------------|----------------------|----------------|--------------------------------------------|
| Mapre2            | Igfbpl1              | Meox2          | Rad18                                      |
| Pros1             | Nfatc4               | Meox2          | Hhex                                       |
| Umod              | Nfatc4               | Rwdd4a         | Myadm                                      |
| Pacrgl            | Akr1cl               | Arhgap9        | Rpl39l                                     |
| Pank3             | Ugt2b38              | Ifitm1         | Gdap1                                      |
| Gm8539///Zbtb8os  | Fbln2                | Lmf1           | Pvrl3                                      |
| Ifih1             | Rbm47                | Slc12a1        | Ergic1                                     |
| Lama2             | Smarcc1              | Aif1l          | Ergic1                                     |
| Dimt1             | Pdia3                | Gm5526///Gm85  | Crispld1                                   |
| Hapl1             | Zic3                 | Dclk1          | Crispld1                                   |
| Hapl1             | Adcyap1              | Dclk1          | Cacna1g                                    |
| Snx20             | Ror2                 | Haus7          | Laptm4a                                    |
| B4galt7           | Pck1                 | Apex2          | Nfatc4                                     |
| Maged2            | Hs3st1               | Esco1          | Nfatc4                                     |
| 6330416G13Rik     | Sema6c               | Tspan17        | Agt                                        |
| Pdgd              | Ptbp2                | Pcdha1///Pcdha | Ugt2b38                                    |
| Bcl2l11           |                      | Sep-02 Ube2m   | Yaf2                                       |
| Tead4             | Zic1                 | Lpgat1         | Kl                                         |
| Prepl             | Prkcb                | Lpgat1         | Timp4                                      |
| Col4a1            | Bicc1                | Ppapdc3        | Fbln2                                      |
| H2afy2            | Cript                | Psmf1          | Meig1                                      |
| Arf1              | Igdcc3               | Psmf1          | Ptgs1                                      |
| Tgfb2             | Sncaip               | Car11          | Gpr83                                      |
| Capns1            | Jam3                 | Rcn3           | Pdia3                                      |
| Ttl1              | Nnat                 | Selm           | Zic3                                       |
| Ddx3y             | Scn8a                | Asrgl1         | Plbd2                                      |
| Dhrs7             | Nid2                 | Dhx36          | Adcyap1                                    |
| Gpm6a             | Aass                 | Cbx6           | Ror2                                       |
| Plcl2             | Bcas3                | Ogfrl1         | Rhox5                                      |
| Rps6kl1           | G6pc2                | Spon1          | Slc46a2                                    |
| Tbp               | Strn3                | Tada1          | Zic1                                       |
| Klhl22            | Gap43                | Ino80e         | Prkcb                                      |
| Bfar              | Ptpn5                | Ubt1           | Bicc1                                      |
| Tifa              | Ifngr2               | Msr2           | Igdcc3                                     |
| Scppdh            | Kcnc1                | Mrps6          | Klhl10                                     |
| Chst15            | Nell2                | Gprc5c         | Sncaip                                     |
| Gnaz              | Prrt1                | Acaa1b         | Sox5                                       |
| P4ha1             | S1pr1                | Pcyt1a         | Jam3                                       |
| Zfp553            | Fhl4                 | Gprasp1        | Tagln                                      |
| Me2               | Col11a2              | Lpcat1         | Nnat                                       |
| Me2               | Igfbp7               | Ccdc58         | Iapp                                       |
| Add3              | Igfbp7               | Phldb1         | Gyk1                                       |
| Gnl2              | Napsa                | Camkk2         | Nid2                                       |
| Slc18a1           | Ednrb                | Camkk2         | Npm3///Npm3-ps1                            |
| []                | Nek6                 | Angpt13        | Arid3b                                     |
| Ttf1              | Atp8a1               | Txnrd1         | Bcas3                                      |
| Tlcd1             | Traf1                | Zfp428         | G6pc2                                      |
| Qpct              | Itm2a                | Flywch2        | Stk32c                                     |
| Ano10             | Alpl                 | Atl3           | Rbms2                                      |
| Sepn1             | Lrrc8c               | Utp6           | Armc12                                     |
| 9030624J02Rik     | Rasd1                | Dram1          | Swap70                                     |
| AU040320          | Cygb                 | S100a4         | Slc1a4                                     |
| Xylb              | Nr2e3                | Ppp1r8         | Ggcx                                       |
| Antxr2            | Gpr146               | Pycr1          | Ifi44                                      |
| Calm1///Calm2///C | Hrh2                 | Slc25a4        | Akr1b7                                     |
| Tdrd7             | Tmem68               | Polr3d         | Prrt1                                      |
| Cnn3              | Col1a1               | Polr3d         | Abcg1                                      |
| Des               | Dner                 | Tspan2         | Col11a2                                    |
| Donson            | Ldoc1l               | Ddx46          | Trpc4                                      |
| App2              | Fads1                | Ift22          | Ankrd36                                    |
| Ckap4             | Gpsm1                | Stac2          | Igfbp7                                     |
| Ampd2             | Gpsm1                | Srgap3         | Igfbp7                                     |
| Meg3              | Ak3                  | Samd4          | Axl                                        |
| Comm7             | Cnih1                | Ddx6           | Ednrb                                      |
| 6330403K07Rik     | Bambi                | Xrcc4          | Zfpm1                                      |
| Msl3l2            | Igfbp4               | Sumf1          | Lum                                        |
| Pex5              | Igfbp4               | Gprc5b         | Itm2a                                      |
| Rab8b             | Nup133               | Cst12          | Lrrc8c                                     |
|                   | Sep-08 Cxx1a///Cxx1b | Brca1          | Bin1                                       |
| Fmnl3             | Zfp503               | Tceal1         | Rasd1                                      |
| Sirt4             | Rasl11b              | Ift27          | Pcdhga1///Pcdhga10///Pcdhga11///Pcdhga12/, |
| Nov               | Wdr33                | Pdia5          | Cygb                                       |
| Nov               | Fam160b1             | Eva1a          | Gpr146                                     |
| Inhbb             | Gypc                 | Tspan15        | Bmp2                                       |
| RbmX              | Lamc1                | Acp2           | Galnt4                                     |
| Ncam1             | Apbb1                | Slit2          | Pdia6                                      |
| Ncam1             | Apbb1                | Fam222b        | Zdhhc14                                    |
| Chst14            | Celf2                | Cux1           | Col1a1                                     |
| Srxn1             | Pvr                  | Zfyve21        | Fads1                                      |
| Slc25a45          | Hsbp1                | Zfyve21        | Gpsm1                                      |
| Jmjd1c            | Tmem176a             | Exosc4         | Gpsm1                                      |
| Fndc3a            | Aspscr1              | Cacfd1         | Enoph1                                     |
| Mndal             | Olfml2b              | Cacfd1         | Pgd                                        |
| Dapk1             | Celf1                | L3hypdh        | Abcb8                                      |
| Ccdc93            | Hpx                  | Fam210b        | Ak3                                        |
| Medag             | 1110008P14Rik        | Gca            | Gm15455///Rbm10                            |
| Col6a2            | Cers2                | Ccdc136        | Bambi                                      |
| Parp16            | Palm                 | Tmem38b        | Ifitm3                                     |
| Uba7              | Meis3                | Runx2          | Igfbp4                                     |
| Gpr153            | B230219D22Rik        | Gm4024///Tmed  | Athl1                                      |
| Cubn              | Gdf10                | Gorasp2        | Unc93b1                                    |
| Fbxo2             | Gm3470///Rbpr        | Calml4         | Tor2a                                      |
| Nckap5l           | Mfap4                | Mis12          | Nup133                                     |
| Satb2             | Pagr1a               | Mapt           | Vopp1                                      |
| Scara3            | Dennd5a              | Tmem150a       | Cxx1a///Cxx1b                              |
| Phyhipl           | Ginm1                | Rrp36          | Hmgcs2                                     |
| Myh4              | Tspyl4               | Tmem192        | Gypc                                       |
| Htra3             | Rora                 | Ap5m1          | D030056L22Rik                              |
| Ace               | Fgfr1                | Creb3          | Celf2                                      |
| Slc39a14          | Col4a2               | Creb3          | Tmem176a                                   |
| Penk              | Manbal               | Sds            | Aspscr1                                    |
| Mdfic             | Tcta                 | Galnt11        | Olfml2b                                    |

|                     |                 |                   |                                            |
|---------------------|-----------------|-------------------|--------------------------------------------|
| Amph                | Oaf             | Serpina10         | Pkig                                       |
| Stard8              | Tcf4            | Fam115c           | Pdlim2                                     |
| Ap2b1               | Zfp868          | Rsph9             | Kcnab3                                     |
| Mapre3              | Gpx8            | Sez6l             | C3                                         |
| A630072M18Rik       | Igf2r           | Cdh22             | Cers2                                      |
| []                  | Lamb1           | Cald1             | Ropn1l                                     |
| Maz                 | Lamb1           | Cald1             | Meis3                                      |
| Metrn               | Rnf8            | Cald1             | Pomk                                       |
| Ttc19               | Eya2            | Reep3             | Gdf10                                      |
| Adamts10            | Col6a3          | Reep3             | Gm3470///Rbpm2                             |
| Plekha6             | Gprin1          | Reep3             | Mfap4                                      |
| Armcx4              | Sall4           | Pbp2              | Aqp9                                       |
| Col14a1             | Tmem38a         | 1700001O22Rik     | Pagr1a                                     |
| Ldlrad4             | Ccdc80          | Pitx2             | Dennd5a                                    |
| Ldlrad4             | Ccdc80          | Lama4             | Mcfcd1                                     |
| Npr2                | Pigc            | Lama4             | Hvcn1                                      |
| Mettl20             | Pigc            | Slain1            | Rora                                       |
| Cep112              | Tmem41a         | Glycam1           | C1s1                                       |
| Ifnz                | Smarca5         | Gas5              | Tmem242                                    |
| Acsm2               | Fundc1          | Cep68             | Fgfr1                                      |
| Dock6               | Meox2           | Mef2c             | Col4a2                                     |
| Ddx4                | Fam65a          | Trim34a           | Neil3                                      |
| Vcan                | Ces2c///Ces2d-p | Ptbp1             | Scgb1b27                                   |
| Vcan                | Arhgap9         | Ptprd             | Oaf                                        |
| Scn2a1              | Ifitm1          | Rab13             | Tcf4                                       |
| Malat1              | Slc12a1         | Gpr85             | Nek9                                       |
| Ddhd1               | Aif1l           | Gpr85             | Gpx8                                       |
| Sycp1               | Gm5526///Gm8    | Farsa             | Cend1                                      |
| Dnm3os///Mir214     | Dclk1           | Wipi1             | Pttg1                                      |
| Enpp3               | Dclk1           | Bst2              | Nme1                                       |
| Vps18               | Stat3           | Sec63             | Igf2r                                      |
| Ptgir               | Tmem55a         | Dnah8             | Igf2r                                      |
| Tmed7               | Igj             | Steap1            | Lamb1                                      |
| Akna                | Slc25a19        | Pip5k1c           | Lamb1                                      |
| 2810474O19Rik       | Esco1           | Zfp418            | Gm13770///Gm2573///Wdr83os                 |
| Aldh8a1             | Pcdha1///Pcdha  | Calcul1           | Kcnk13                                     |
| Slc30a2             | Lpgat1          | Uroc1             | Ptrf                                       |
| Sult1a1             | Lpgat1          | Klrc1             | Col6a3                                     |
| Zfp931              | Wfdc2           | Stx18             | Tmem98                                     |
| Dapk1               | Ube2e2          | Ephb2             | Rhbdf1                                     |
| Kdm7a               | Ppapdc3         | Mcts1             | Gale                                       |
| Hoxc6               | Uqcr10          | Tpm2              | Gpr371l                                    |
| Hoxc6               | Armcx3          | Ppp6r2            | Fabp4                                      |
| Fes                 | Gimap4          | Ntrk3             | Ccdc80                                     |
| Muc3                | Gimap4          | Ntrk3             | Ccdc80                                     |
| Hsd3b3              | Rcn3            | Zfp286            | Pigc                                       |
| Dscaml1             | Selm            | Zfp286            | Tmem41a                                    |
| F9                  | Asrgl1          | Slamf6            | Fam216a                                    |
| Slco1a5             | Asrgl1          | Ptcd1             | Ncln                                       |
| Cyb5rl              | Dhx36           | Zfp106            | Ptger4                                     |
| Galnt6              | Rufy3           | Rbp3              | Slc25a33                                   |
| Pip4k2b             | Cbx6            | Sorcs3            | Parm1                                      |
| Myo1b               | Lims2           | Rbbp6             | Mtftp1                                     |
| BC018473///BC018    | Ogfr1           | Ifi27l2b          | Meox2                                      |
| Bmp1                | Spon1           | Klhl36            | Meox2                                      |
| Atp1a2              | Ccpg1           | Ncam1             | Fam65a                                     |
| Pigu                | Csgalnact2      | Hsd3b2            | Ces2c///Ces2d-ps                           |
| Eml5                | Msrp2           | Ccdc166           | Ifitm1                                     |
| Ptprb               | Mrps6           | Tspan33           | Lmf1                                       |
| Itga8               | Pja2            | Trabd             | Slc12a1                                    |
| Scn7a               | Tm4sf5          | Rorb              | Dclk1                                      |
| Myh1                | Frs3            | Gzmn              | Dclk1                                      |
| Plekhs1             | Gprc5c          | Rho               | Haus7                                      |
| Bicd1               | Gprasp1         | Sgip1             | Pomt1                                      |
| Slc22a18            | Lpcat1          | Sgip1             | Tmem55a                                    |
| 4930535I16Rik       | Lpcat1          | Ska1              | Slc24a3                                    |
| Obsl1               | Phldb1          | Lmbrd1            | Tspan17                                    |
| Sobp                | Rapgef3         | Phospho2          | Oasl1                                      |
| Krtap16-3           | Rapgef3         | Ptpn2             | Pcdha1///Pcdha10///Pcdha11///Pcdha12///Pcc |
| []                  | Camkk2          | Ptpn2             | Lpgat1                                     |
| Rian                | Camkk2          | Ddx19b            | Ube2e2                                     |
| 8430419L09Rik       | Camkk2          | P2ry6             | Ppapdc3                                    |
| Tsix                | Cst8            | Ffar2             | Mycbpap                                    |
| Plekhh2             | Angptl3         | Gngt1             | Gimap4                                     |
| Cacna1h             | Txnrd1          | Dguok             | Gimap4                                     |
| Fut10               | Txnrd1          | Tmem258           | Car11                                      |
| Cul9                | Ugt3a1          | abParts///lgh///l | Rcn3                                       |
| Muc5b               | Zfp768          | Ptger3            | Selm                                       |
| Trbv13-2            | Cd177           | Mad11l            | Cbx6                                       |
| Ceacam1             | Ccdc12          | Dixdc1            | Cldn23                                     |
| Pappa               | Dram1           | Eri3              | Ogfr1l                                     |
| Nek4                | Mmd2            | Rap1gds1          | Spon1                                      |
| Runx1t1             | S100a4          | Pear1             | Mtap                                       |
| []                  | Car10           | Psmc3ip           | Msrp2                                      |
| Trav9d-3            | Pycr1           | Asph              | Abcg4                                      |
| []                  | Ece2            | Fbrs              | Mrps6                                      |
| BC025933            | Slc25a4         | Tsc22d3           | Tm4sf5                                     |
| Siglec1             | Slc25a4         | Crygn             | Trim6                                      |
| Sema3e              | Stac2           | Dtna              | Gprc5c                                     |
| Pcdha1///Pcdha10    | Farp2           | Zcchc18           | Acaa1b                                     |
| Ifnar2              | Srgap3          | Rgs3              | Gprasp1                                    |
| Gnrhr               | Caap1           | Dak               | lpo9                                       |
| Ceacam1             | Samd4           | Ncam2             | Phldb1                                     |
| Gdf11               | Lmcd1           | Prima1            | Phldb1                                     |
| Zfp148              | Ddx6            | Col26a1           | Camkk2                                     |
| Nfia                | Fgl1            | Zfp605            | Camkk2                                     |
| Dscaml1             | Sumf1           | Clmn              | Camkk2                                     |
| Lcn2                | Gprc5b          | Cyb5r3            | Arhgef7                                    |
| Eri3                | Hpd             | Plcb4             | Angptl3                                    |
| Camk2d              | Cst12           | Plcb4             | Txnrd1                                     |
| TCRB///Tcrb-J///Trl | Rev3l           | Zfp318            | Txnrd1                                     |
| Slc2a3              | Tceal1          | Myef2             | Flywch2                                    |



|                     |               |               |               |
|---------------------|---------------|---------------|---------------|
| Defb7               | Hmgcl         | Cyp2d13       | Atf3          |
| Defb10              | Pdia5         | Aqp4          | Oit1          |
| Fgfr4               | Eva1a         | Pbx1          | Atp6v0a2      |
| Defb8               | Tspan15       | Akr1c20       | B230354K17Rik |
| []                  | Slit2         | Dnm3          | Coa7          |
| LOC171588           | Plekhf1       | Clec4a2       | Grp           |
| Mfsd11              | Creb3l3       | Chrna2        | Tgds          |
| []                  | Cacfd1        | Nlrp3         | Cgref1        |
| []                  | Gca           | Slc1a1        | Mmd2          |
| Ercc6l2             | Ccdc136       | Glis1         | Oas1e         |
| Cebpb               | Runx2         | Wif1          | Nck1          |
| Igkv6-15            | Calml4        | Krtap19-3     | Zfyve27       |
| []                  | 1300017J02Rik | Oprm1         | 9430015G10Rik |
| Myh1                | Tmem150a      | Msr1          | Pycr1         |
| Col3a1              | Ccr5          | Guca1b        | Ece2          |
| Col3a1              | P2ry14        | Tgfb2         | Slc25a4       |
| Pold4               | Rasgrf1       | Klra12        | Slc25a4       |
| Gimap6              | Ap5m1         | Il12a         | Polr3d        |
| Vasn                | Creb3         | Grb10         | Stac2         |
| Tmem173             | Sds           | Fbxw11        | Srgap3        |
| Rhoq                | Galnt11       | Senp2         | Dnase1        |
| Stx17               | Ms4a7         | Smyd5         | Lmcd1         |
| Maml2               | Hip1          | Tox           | Fgl1          |
| Acyp2               | Rsph9         | Slu7          | Sumf1         |
| Dpyd                | Sez6l         | Slu7          | Gm4354        |
| Dpyd                | Cdh22         | Bmpr1a        | Gm4354        |
| Ccdc102a            | Cald1         | []            | Gprc5b        |
| Tgif2lx1///Tgif2lx2 | Cald1         | Mark1         | Ifi35         |
| Cdc73               | Cald1         | Mark1         | Camk1g        |
| Gm10436///Gm204     | Reep3         | Map2k7        | Pdia5         |
| Efcab14             | Reep3         | Pik3r1        | Tspan15       |
| Cmip                | Reep3         | Dhdds         | Acp2          |
| Spin4               | Reep3         | Rbm25         | Acp2          |
| Col16a1             | Dram2         | Prrx1         | Slit2         |
| Rufy2               | Gm13139       | Prrx1         | Cux1          |
| BC028528            | Wdr45         | Prrx1         | Mab21l1       |
| 6030458C11Rik       | Pitx2         | Znhit1        | Cacfd1        |
| Pitpnc1             | Adam5         | Bin1          | Gca           |
| Tshz2               | Enah          | Otc           | Tmem38b       |
| LOC100653389        | Lama4         | Trnt1         | Runx2         |
| Mchr1               | Lama4         | Pcdh10        | Calml4        |
| Gm568               | Cecr5         | Rest          | Tmem150a      |
| Wdr20               | Glycam1       | Anxa5         | Adig          |
| []                  | Rbks          | Asap1         | Rasgrf1       |
| Ankrd46             | Kcnma1        | Epha3         | Slc25a25      |
| Tmem158             | Mef2c         | Epha3         | Creb3         |
| Slitrk1             | Olah          | Gfra2         | Ms4a7         |
| Sh3bgrl             | Homer3        | []            | Hip1          |
| Manf                | Glyat         | Tnpo2         | BC018242      |
| Lingo1              | Ptprd         | Lamc3         | Rsph9         |
| Lman1               | Rab13         | Qk            | Sez6l         |
| Eef1d               | Gpr85         | Gm11787///Lyn | Cdh22         |
| Ap5s1               | Lrrc46        | Gatad1        | Cald1         |
| Eif1b               | Cipc          | Tmem176a      | Cald1         |
| 2210016F16Rik       | Wipi1         | Dusp3         | Cald1         |
| Ebf3                | Sec63         | Galnt2        | Oas1a         |
| Ppm1m               | Sec63         | Cux1          | Reep3         |
| Hba-a1///Hba-a2     | Igll1///Iglv1 | Epm2aip1      | Reep3         |
| Atraid              | Myo5c         | Lepr          | Reep3         |
| Rassf2              | Plin5         | Rbpms         | Reep3         |
| Lrrc8a///Phyhd1     | Steap1        | Krtap16-1     | Dram2         |
| Zcchc3              | Ahdc1         | Zic5          | 1700001O22Rik |
| Col14a1             | Ahdc1         | St3gal4       | Ccsap         |
| Spsb1               | Car8          | Btrc          | Pitx2         |
| Lphn1               | Rp1           | Cflar         | Tmem214       |
| Zswim7              | Upp2          | B3gat1        | Lama4         |
| Rarres2             | Purg          | Tbx5          | Lama4         |
| Ppfia4              | Zfp418        | Crebzf        | Slain1        |
| Ppfia4              | Emr4          | Abhd14a       | Ncmap         |
| Lysmd2              | Proser2       | Grm1          | Gas5          |
| Cand1               | Nr2c2         | Rgs3          | Cep68         |
| Ckmt2               | Ubxn2a        | Enpp5         | Mef2c         |
| Nfam1               | Tmem106a      | Homer1        | Ptprd         |
| Cd99                | Mboat2        | Akt1          | Slc29a4       |
| Parm1               | Dnmt3l        | Rnf146        | Kdm5d         |
| Rftn2               | Slc22a19      | Igfbp1        | Mtfmt         |
| Slc9a3r2            | Kcnj6         | Ppp2r5c       | Wipi1         |
| Slc9a3r2            | Ppp6r2        | Cldn19        | Gdap1l1       |
| Abcc3               | Zfp472        | Mxi1          | Dnah8         |
| Ptprd               | Prmt6         | 1500002F19Rik | Steap1        |
| Limd2               | Wasf3         | Mgat5         | BC021614      |
| Toporsos            | Fcrl1         | Stxbp6        | Pip5k1c       |
| Zbtb46              | Fcrl1         | Bcat2         | Ahdc1         |
| Sox17               | Arnt          | Diablo        | Ahdc1         |
| Cdad1               | Ntrk3         | A730028G07Rik | Tapbp1        |
| Saal1               | Gatad2b       | Nmnat1        | Rp1           |
| 5730408K05Rik///N   | Dnajc18       | C87436        | Ppp1r42       |
| Ikbip               | Zfp286        | Tc2n          | Odf4          |
| 2610524H06Rik       | Zfp286        | Olfm1         | Glyctk        |
| Rbpms               | Otor          | Pola2         | Glyctk        |
| Ercc8               | Gimap7        | Map3k7        | Sectm1a       |
| Calcoco2            | Ptcd1         | Mbd2          | Tcte2         |
| Ppap2b              | Zfp106        | Med21         | Ephb2         |
| Plscr1              | BC006965      | Myocd         | E430018J23Rik |
| Pet100              | Klhl36        | Fabp4         | Tpm2          |
| Wrnip1              | Oit3          | Zfp287        | Slc17a2       |
| Nudcd1              | Ncam1         | Dtx1          | Dnmt3l        |
| DXBay18///Gm146     | Rab3il1       | Sorbs1        | Lhx3          |
| Dtna                | Dnm2          | Slc26a7       | Ppp6r2        |
| Pvr                 | H2-Q10        | Edil3         | Ppp6r2        |
| Ahnak               | Rorb          | Zak           | Wasf3         |
| Nupl1               | Gngt1         | Prlr          | Arnt          |

|                   |                 |               |                                       |
|-------------------|-----------------|---------------|---------------------------------------|
| Cdc42ep5          | Adam15          | Psen2         | Ntrk3                                 |
| Ppp3cc            | Rho             | Kcnp2         | Ntrk3                                 |
| Tsnax             | Sgip1           | Gm10229       | Skp2                                  |
| Bcat1             | Sgip1           | Lepr          | Dnajc18                               |
| Tmod2             | Klk1b22///Klk1b | Lepr          | Zfp286                                |
| Grb10             | Lmbrd1          | Grtp1         | Zfp286                                |
| Cyp4f16///Cyp4f37 | Ptpn2           | Fbn1          | Otor                                  |
| Cyp4f16           | Ube3a           | []            | Rarres2                               |
| Aktip             | Lbh             | Nfkb2         | Slc44a3                               |
| Dqx1              | P2ry6           | Gnb1          | Sptbn4                                |
| Eif2ak3           | Scgb3a2         | Fgfr1         | Spire2                                |
| Glb1l             | Krtap6-5        | Cep164        | Rnf183                                |
| Sulf2             | Slc14a2         | Spats2l       | Ncam1                                 |
| St8sia4           | Dixdc1          | Ifi44l        | Ptpn5                                 |
| Abcb9             | Pear1           | 1810055G02Rik | Rab3il1                               |
| Pcdh18            | Pear1           | Atf5          | Gbp7                                  |
| Bcl2l2            | Asph            | Xkr6          | Golt1a                                |
| Sncaip            | Slit1           | Mlx           | Rorb                                  |
| Auh               | Tsc22d3         | Nt5c2         | Gngt1                                 |
| Cd99              | Crygn           | B4galt4       | Rho                                   |
| Vamp5             | Zfp189          | Hspb11        | Sgip1                                 |
| Armc6             | Zcchc18         | Ankmy2        | Sgip1                                 |
| Mvk               | Rgs3            | Fanci         | Klk1b22///Klk1b9                      |
| Pla2g7            | Zfp825          | Gpm6b         | Klhl25                                |
| Tcte2             | Naip1           | Klra16        | Tnfrsf19                              |
| 4933428G20Rik     | Ncam2           | Myocd         | P2ry6                                 |
| Habp4             | 4930432F04Rik   | Col5a3        | Slc22a29                              |
| Prss23os          | Carf            | Masp1         | Birc3                                 |
| Ube2s             | Dock7           | Eya3          | Tcf7l2                                |
| Morn3             | abParts///Ighm  | Kank2         | Wsb1                                  |
| Pdia6             | Rab43           | Slc7a2        | Slc14a2                               |
| Farsb             | Plcb4           | Epb4.1l3      | Mad1l1                                |
| Ubap2l            | Plcb4           | Tro           | Acot5                                 |
| Sqrdl             | Ccdc28a         | Plaa          | Pear1                                 |
| Scoc              | Zfp318          | Cdc7          | Pear1                                 |
| Psm11             | Zfp318          | Dbn1          | Kif1b                                 |
| Snca              | Myef2           | Prpf6         | Asph                                  |
| Pitpnc1           | Myef2           | Pde1c         | Tsc22d3                               |
| Fbxo3             | Srxn1           | Tfap2a        | Crygn                                 |
| Hoxd8             | Acsf2           | Cenpb         | Cr2                                   |
| Rragd             | B4galnt1        | Npy1r         | Dtna                                  |
| Fndc4             | Sox10           | Gem           | Zcchc18                               |
| Clec2h            | Erg             | Fmr1          | Rgs3                                  |
| Hspa9             | Dnajc19///Dnajc | Fert2         | Naip1                                 |
| Tmem263           | Herc1           | Ccdc106       | Ncam2                                 |
| Twf2              | Pbx1            | Tk2           | BC027072                              |
| Tmod2             | Ube4a           | Ubxn11        | Trim31                                |
| Wfdc1             | Adat1           | Asb18         | Dock7                                 |
| Parva             | Cpsf4l          | Tomm40        | Gm13271///Gm13272///Gm13275///Gm13276 |
| Mbtps1            | Dnm3            | []            | Ms4a4b                                |
| Jam2              | 2610034M16Rik   | Park2         | Cd8a                                  |
| Cxc5              | Slc1a1          | Ackr4         | Plcb4                                 |
| Synj2bp           | Klra21///Klra8  | Chpt1         | Kcnk3                                 |
| Cd164             | Lats2           | Cldn10        | Ccdc28a                               |
| Psen2             | Glis1           | Gipc3         | Srprb                                 |
| Gm15270           | []              | Stx3          | Myef2                                 |
| Lypd1             | Wif1            | Gm21320///LOC | Myef2                                 |
| Dpp3              | Gm20767         | Lats2         | Enpp3                                 |
| Lhx9              | Hif3a           | Stk16         | Riok1                                 |
| Uggt2             | Krtap16-3       | Lat2          | Hus1                                  |
| Ccdc97            | []              | Hax1          | Itgal                                 |
| Dtnbp1            | Msr1            | Dusp15        | Numb                                  |
| Gtf2i             | Guca1b          | Rev3l         | Dnajc19///Dnajc19-ps                  |
| Gmfb              | Oscar           | Igh-VJ558     | Tdpoz1                                |
| Kazn              | Tfap2d          | Plagl1        | Herc1                                 |
| Lig3              | Tgfb2           | Tmem161a      | Hgf                                   |
| Bnip2             | []              | Tmem161a      | Akr1c20                               |
| Mto1              | Ppap2a          | Tmem216       | Mfsd7b                                |
| Sdccag3           | Klra12          | Ttc39c        | Cpsf4l                                |
| Irak1bp1          | Il12a           | Cmtm2a        | Dnm3                                  |
| Cbx1              | Grb10           | Bmp1          | 2610034M16Rik                         |
| Hmgn3             | Mtmt2           | Polr2a        | Tprkb                                 |
| Ypel1             | Senp2           | Mapre2        | Rfx3                                  |
| Stk11ip           | Vps39           | Mapre2        | Slc1a1                                |
| Rgl3              | Tox             | Timm17a       | Gm20274                               |
| Emilin1           | Tox             | Pank3         | Glis1                                 |
| C1qtnf6           | Mtmt6           | Tmem203       | []                                    |
| LOC102636151      | Slu7            | Wdpcp         | Wif1                                  |
| Mus81             | Slu7            | Lama2         | Krtap16-3                             |
| C4bp-ps1          | Wdr13           | Atxn7         | Msr1                                  |
| Pde3a             | []              | Maged2        | []                                    |
|                   | Sep-06          | []            | Bre                                   |
| As3mt             | Mark1           | Bre           | Guca1b                                |
| Artn              | Map2k7          | 6330416G13Rik | Tgfb2                                 |
| Prdm5             | Pik3r1          | 6330416G13Rik | Cldn18                                |
| Cyp1b1            | Dhdds           | Bcl2l11       | Grb10                                 |
| Prrx1             | P2rx4           | Ntng1         | Senp2                                 |
| Tex13             | Prrx1           | Prepl         | []                                    |
| Eng               | Prrx1           | Prepl         | Slu7                                  |
| Sox5              | Prrx1           | Col4a1        | Mylk                                  |
| Tlcd2             | Znhit1          | H2afy2        | Pik3r1                                |
| Sntg1             | Bin1            | Far1          | Ogt                                   |
| Ost4              | Otc             | Far1          | Ogt                                   |
| Matk              | Plekha5         | Oxnad1        | Paip1                                 |
| Prrx2             | Plekha5         | Reep5         | Prrx1                                 |
| Sync              | Lst1            | Tgfb2         | Prrx1                                 |
| Spr               | Cdk12           | Vwa1          | Bin1                                  |
| Epha1             | Cdk12           | Capns1        | Plekha5                               |
| Bmp7              | Trnt1           | Neurod1       | Plekha5                               |
| AK3               | Pcdh10          | Atoh8         | Lst1                                  |
| Spn-ps            | Rest            | Thap7         | Tsc22d3                               |
| Pde10a            | Slamf1          | Ddx3y         | Trnt1                                 |
|                   |                 |               | Pcdh10                                |

|               |               |                |                                     |
|---------------|---------------|----------------|-------------------------------------|
| Nnmt          | Epha3         | Dhrs7          | Rest                                |
| Nup54         | Epha3         | Gpm6a          | Rest                                |
| Sec62         | Ahcyl1        | Rhbdd2         | Asap1                               |
| Prrg2         | Gfra2         | Nup35          | Epha3                               |
| Nkx2-4        | Emcn          | Pja1           | Epha3                               |
| []            | Lamc3         | Plcl2          | Ahcyl1                              |
| Tgm2          | Gm11787///Lyn | Rps6kl1        | Gfra2                               |
| Ttc7b         | Plcb1         | 0610037L13Rik  | Emcn                                |
| Edil3         | Tmem176a      | 0610037L13Rik  | Mlph                                |
| Epb4.1l2      | Slc5a8        | Tbp            | Tnpo2                               |
| Epb4.1l2      | Ncf1          | Hmbs           | Lamc3                               |
| Reep1         | Edil3         | Klhl22         | Qk                                  |
| Fli1          | Nol6          | Ubxn4          | Gm11787///Lyn                       |
| Timp2         | Ppp1r3c       | Bfar           | Plcb1                               |
| 2210016L21Rik | Cfhr2         | Tdp1           | Tmem176a                            |
| Ppp1r3c       | Lepr          | Kdm5c          | Crkl                                |
| Ldb3          | Rbpms         | Rnf121         | Ncf1                                |
| Sun2          | St3gal4       | Sccpdh         | Cux1                                |
| Sdhaf1        | Mapk8ip1      | Chst15         | Cux1                                |
| Zik1          | Btrc          | Lpin1          | H2-D1                               |
| Tufm          | []            | Gnaz           | Tgfbr3                              |
| Cdh5          | Akr1b10       | P4ha1          | Edil3                               |
| Rrnad1        | Cflar         | Gnpda2         | Epm2aip1                            |
| Fermt3        | Dpys          | Nrp2           | Gstm1                               |
| Fam117b       | B3gat1        | Trp53          | Nol6                                |
| Repin1        | Dnah8         | Usp11          | Gypa                                |
| Repin1        | Tbx5          | Endod1         | Lepr                                |
| Ubfd1         | Nxn1          | Sidt1          | Trim60                              |
| Lamtor1       | Abhd14a       | Scpep1         | Slc39a14                            |
| Tcf4          | Rgs3          | 0610010B08Rik/ | Rbpms                               |
| Tcf4          | Enpp5         | Olfm1          | Cdad1                               |
| Khdc1b        | Dhrs11        | Me2            | Cdad1                               |
| Fermt2        | Ero1lb        | Add3           | Klhl20                              |
| Fermt2        | Kcnj6         | Gnl2           | Zic5                                |
| Shmt2         | Nfam1         | Atf2           | St3gal4                             |
| []            | ligp1b        | Atf2           | Lpp                                 |
| Fam174b       | Ppp2r5c       | Gab3           | Mapk8ip1                            |
| Snhg11        | Ppp2r5c       | Uty            | Tprkb                               |
| Prkar1b       | Cldn19        | Crtac1         | []                                  |
| Coro2b        | Ankrd24       | Ttyh1          | Akr1b10                             |
| S100b         | Pld1          | Ppp2r2b        | Akr1b10                             |
| Fez2          | Suv420h1      | Qpct           | Cflar                               |
| Sfmbt2        | Stxbp6        | Tmem184c       | Dpys                                |
| Map3k14       | Pitpnm1       | Tmeff1         | B3gat1                              |
| AW112010      | Bcat2         | Mcm3           | Tbx5                                |
| Gbp7          | []            | Zc3hc1         | Tbx5                                |
| Rnf157        | Six4          | Ano10          | Abhd14a                             |
| Morc4         | Col4a4        | Flna           | Grm1                                |
| Samhd1        | Tmem167       | Sepn1          | Rgs3                                |
| Atcay         | Rorc          | Lrpap1         | Rnf17                               |
| Papss2        | Fmo4          | Antxr2         | Akt1                                |
| Aard          | Myocd         | Calm1///Calm2/ | Bak1                                |
| Rps6kc1       | Calcr1        | Tmco3          | Ppp2r5c                             |
| Tbca          | Zfp287        | Apbb2          | Ppp2r5c                             |
| Sema4d        | Slc8a1        | Cnn3           | Srgap3                              |
| Hsd17b11      | Zbtb7c        | Des            | Stxbp6                              |
| Ccm2          | Dtx1          | Abcf3          | Pitpnm1                             |
| Ctbp2         | Cfhr2         | Ckap4          | Six4                                |
| Ero1lb        | Sorbs1        | Ampd2          | Akr1d1                              |
| Coro2b        | Bbx           | 6330403K07Rik  | Nmnat1                              |
| Sema5a        | Slc26a7       | Msl3l2         | LOC101055731///LOC101055745///Sytl3 |
| Cacng5        | Shoc2         | Tyw1           | Fcrla                               |
| Pkig          | Nek6          | Dhx38          | Myocd                               |
| Hmgn3         | Amigo1        | Ssrp1          | Fabp4                               |
| Atp1a2        | Catsperg1     | Rusc2          | Calcr1                              |
| Hspb7         | Prlr          | Rusc2          | Dtx1                                |
| Tpcn1         | Plekha4       | Rab8b          | Cfhr2                               |
| Dnajc27       | Psen2         | Sep-08         | Eml6                                |
| Sacs          | Igk-V28       | Fmn13          | Sorbs1                              |
| Dhh           | Gm10229       | Eif4g3         | Gpam                                |
| Eif4ebp1      | Lepr          | Map2k6         | Limk1                               |
| Pi4ka         | Lepr          | Nov            | Slc26a7                             |
| Zfp787        | Zfp352        | Nov            | Edil3                               |
| Tmem27        | Zfp352        | Arhgef25       | Dusp26                              |
| Pitpnc1       | Gdf2          | Inhbb          | Nek6                                |
| Klhdc2        | Kcnab2        | Ncam1          | Prlr                                |
| Tvp23a        | Wnt9a         | Ncam1          | Cacna2d1                            |
| Elk3          | Ly6i          | Chst14         | Psen2                               |
| A230050P20Rik | Fhit          | Nudt10///Nudt1 | Lepr                                |
| Gjc2          | Mrgprf        | Ehmt2          | Lepr                                |
| N6amt2        | Fbn1          | Zfp191         | Wnt9a                               |
| Cox6b2        | Dnajc2        | Jmj1c          | Pnoc                                |
| 1110004E09Rik | Fgfr1         | Dnajc10        | Fbn1                                |
| Far1          | Armcx1        | Dnajc10        | []                                  |
| Psma6         | Ifi44l        | Lss            | Olfm3                               |
| Psma6         | Otx2          | Dapk1          | Itsn1                               |
| Lpgat1        | Atf5          | Rc3h2          | Nfkb2                               |
| Lpgat1        | Mlx           | Plcg2          | Amot                                |
| Fam105a       | Hspb11        | Nova1          | Fgfr1                               |
| Ndn           | Gpm6b         | Tsr2           | Cep164                              |
| Ndn           | Ifng          | Fbxw8          | Slc26a8                             |
| Vwf           | Slc17a9       | Col6a2         | Ifi44l                              |
| Rhoc          | Gcg           | Tpr            | []                                  |
| B3gnt9        | Klra16        | Parp16         | Ndufa12                             |
| Fcgr2b        | Ubc           | Rps9           | 1810055G02Rik                       |
| Bmp7          | Mcpt4         | Rdh10          | Atf5                                |
| Adora1        | Speg          | Sec24d         | Xkr6                                |
| Ptprd         | Mapk8ip3      | Gpr153         | Rad50                               |
| Rasgrf1       | Myocd         | 2310067B10Rik  | Gpm6b                               |
| Hs3st3a1      | Col5a3        | Klhl42         | Rad51d                              |
| Il17d         | Masp1         | Cubn           | Slc25a30                            |
| Snrpn///Snurf | Nfatc2        | Pcnxl4         | Tbata                               |

|                 |                 |                |                                        |
|-----------------|-----------------|----------------|----------------------------------------|
| Rnaseh2c        | Kank2           | Zfand3         | Il1f9                                  |
| Vimp            | Asah2           | Fbxo2          | Ubc                                    |
| Fgf14           | Oxtr            | Dennd4b        | Spep                                   |
| Cebpzoz         | Eomes           | Ptprz1         | []                                     |
| B4galt6         | Dmp1            | Scara3         | Masp1                                  |
| Fam169a         | Ubxn10          | Fth1           | Eya3                                   |
| Aplp1           | Pip5k1a         | Mtmr7          | Nfatc2                                 |
| Cd300a          | Ccar2           | Myh4           | Kank2                                  |
| Atp1a1          | Tro             | Htra3          | Wt1                                    |
| Tfb1m           | Tmpo            | Ace            | Oxtr                                   |
| Dpep1           | Dbn1            | Slc39a14       | Eomes                                  |
| Taok3           | Laptm5          | Penk           | Cdc7                                   |
| Meg3///Meg3     | Prpf6           | Amph           | Kcnq2                                  |
| Kalrn           | Nfat5           | Synpo          | Slc7a2                                 |
| Slc6a17         | Nfatc2          | Acacb          | Cdhr5                                  |
| Gm20559         | Capn3           | Adamts15       | Tro                                    |
| 2310075K07Rik   | Tfap2a          | Nt5dc3         | Tmpo                                   |
| Tcf7l1          | Xpr1            | Stard8         | Dbn1                                   |
| Tle2            | Pigq            | A630072M18Rik  | Nfat5                                  |
| []              | []              | []             | Rgs16                                  |
| Dpys            | []              | Maz            | Ptpr                                   |
| Vps53           | Cyp3a44         | 9530068E07Rik  | Tfap2a                                 |
| Zbtb12          | Cdc27           | Tmem259        | Xpr1                                   |
| Ran             | Cd247           | 5430421N21Rik  | Pigq                                   |
| 1110057K04Rik   | Wnt10b          | Fbxo4          | Gem                                    |
| 4932441J04Rik   | Gm10997         | Copg2os2       | Cmklr1                                 |
| Ceacam10        | Cd72            | Adamts10       | Moxd2                                  |
| Rab40b          | Kcnj9           | Bckdhb         | Gpr108                                 |
| Pag1            | Cd244///LOC677  | Ccdc85a        | Kcnq2                                  |
| Bola2           | Coro6           | Armcx4         | Dio2                                   |
| Hamp2           | Klra18          | Col14a1        | BC003331                               |
| B130024G19Rik   | Trdn            | Slc27a3        | Fert2                                  |
| Slc35a2         | Park2           | Ldlrad4        | Ccdc106                                |
| Rundc3a         | Klra21          | Ldlrad4        | Cyp2j13                                |
| Aldh9a1         | Rex2            | Npr2           | Asb18                                  |
| Nrep            | Mrgpra1         | BC022960       | Rrbp1                                  |
| Sorbs1          | Trdn            | Mettl20        | Klra18                                 |
| Cnn3            | Casp3           | Afg3l2         | Prss44                                 |
| Fam13c          | Mup5            | Krtap8-1       | Mitd1                                  |
| Pgd             | Klra7           | Mapkap1        | Park2                                  |
| Slc7a4          | Ighg            | Pfkfb1         | Klra21                                 |
| Wnt5a           | Il24            | Ifnz           | Rex2                                   |
| Ttll1           | Pdcd6ip         | B930041F14Rik  | Ackr4                                  |
| Cnn3            | Fgf5            | Ift122         | Trdn                                   |
| Impa1           | Dusp15          | Ddx4           | Cldn10                                 |
| Pkn1///Ptger1   | Bcl2l1          | Rel1           | Gm21320///LOC100048884///Mup1///Mup10/ |
| Il7             | Otos            | Dmrtb1         | Usf1                                   |
| Tmsb10          | Igkv4-72        | Suz12          | Mup5                                   |
| Gpsm1           | Krtap19-4       | Vcan           | Cd8b1                                  |
| Rab2b           | Parp3           | Vcan           | Cd209a                                 |
| Klf9            | Imp4            | Trim24         | []                                     |
| Wipf1           | Tmem216         | Rnf214         | BC005685                               |
| Wipf1           | Ttc39c          | Six1           | Dusp15                                 |
| Pdgfrb          | Cmtm2a          | Malat1         | Ighm                                   |
| Cct8            | Rbp4            | Slc38a10       | Opr1                                   |
| Rbm14           | Vit             | Slc38a10       | Plagl1                                 |
| Sntb2           | Bmp1            | Dnm3os///Mir21 | Tmem161a                               |
| Pfn2            | Mapre2          | Ptgir          | Glul                                   |
| Lyz1            | Mapre2          | Tmed7          | Glul                                   |
| Sh3bgrl         | Mau2            | Brat1          | Bmp1                                   |
| Pla2g1b         | Cpz             | A230046K03Rik  | Mapre2                                 |
| Rbm14           | Umod            | Tmem120b       | Mapre2                                 |
| Slc2a3          | Tm2d1           | Akna           | Pros1                                  |
| Api5            | Nefl            | Ighm           | Umod                                   |
| Phyhipl         | Pank3           | Cars           | Pacrgl                                 |
| Lats2           | Vamp7           | Slc30a2        | Tm2d1                                  |
| Igf2bp2         | Smc5            | Gtpbp6         | Smc5                                   |
| Gm15393///Gm15: | Smc5            | Clasp1         | Smc5                                   |
| Foxm1           | Wdpcp           | Dapk1          | Slc9a8                                 |
| Rbpms           | Ntm             | Kdm7a          | Uxs1                                   |
| Pcolce          | Lama2           | Hoxc6          | Catsper1                               |
| Gsn             | Dimt1           | Hoxc6          | Krt20                                  |
| Tmsb10          | Zfp790          | Fes            | Lama2                                  |
| Gabbr1          | Hapln1          | Abca8a         | Hapln1                                 |
| Mapk10          | Hapln1          | Hsd3b3         | Hapln1                                 |
| Ccdc88a         | Rad52           | Krt75          | Snx20                                  |
| Xbp1            | Upk1a           | Aldh1a3        | Maged2                                 |
| Prmt2           | Maged2          | Slco1a5        | Bre                                    |
| Lpp             | Asb9            | Mar-09         | Stard6                                 |
| D2hgdh          | Pdgfd           | []             | Kcnmb2                                 |
| Ctnna1          | Tbx4            | Pip4k2b        | Ntng1                                  |
| Tgm2            | Scn3b           | Prmt5          | Slc1a3                                 |
| F2r             | Cacng5          | Abcf1          | Col4a1                                 |
| Pttg1ip         | Frmd4b          | Ttn            | H2afy2                                 |
| Bscl2           | Bcl2l11         | Myo1b          | Rin2                                   |
| Ddx39b          | Cacng7          | Cpn2           | Far1                                   |
| Gtf2h4          | Ntng1           | Hspa5          | Arf1                                   |
| Fgd1            | Slc1a3          | Pigu           | Tgfbr2                                 |
| Scarb1          | Prepl           | Ppp3cb         | Capns1                                 |
| Pgd             | Col4a1          | Napb           | Neurod1                                |
| Slc52a2         | Zbed6///Zc3h11: | Usp12          | Gm17066///Rbm26                        |
| Creb3l2         | H2afy2          | Atp1a3         | Slc4a4                                 |
| Aldh9a1         | Far1            | Lrr1           | Dhrs7                                  |
| Igf1            | Far1            | Mphosph8       | Gpm6a                                  |
| Igfbp4          | Far1            | Epha7          | Rhbdd2                                 |
| Igfbp4          | Zfp281          | Obsl1          | Rps6kl1                                |
| []              | Tgfbr2          | Sobp           | 0610037L13Rik                          |
| []              | Rbm26           | Uba1y          | Tbp                                    |
| Sgcg            | Ttll1           | Clns1a         | Zfp52                                  |
| Gnl2            | Rhbdd2          | Kmt2d          | Rasa1                                  |
| Mmp16           | Pja1            | Atf2           | Rasa1                                  |
| Atf7            | Pja1            | Prkca          | Klhl22                                 |

|                    |                  |                   |                                         |
|--------------------|------------------|-------------------|-----------------------------------------|
| Rac1               | Plcl2            | Tpm3              | Bfar                                    |
| Glrx2              | Dlgap4           | Ift80             | Tdp1                                    |
| Cux1               | Rps6kl1          | Igk-V28///Igkv6-  | Tifa                                    |
| D1Pas1             | Tbp              | Rhbdl3            | Gfaf                                    |
| Pcbp3              | Zfp52            | Plekhh2           | Sccpdh                                  |
| Pitpnm1            | Rasa1            | Gm13583           | Olfm3                                   |
| C1qb               | Rasa1            | Cdh9              | Chst15                                  |
| Lrrtm1             | Klhl22           | Pappa             | Nrp2                                    |
| Tmem158            | Bfar             | Kif5a             | Klh5                                    |
| Fuca1              | Kifc2            | Runx1t1           | Usp11                                   |
| Zbed3              | Kdm5c            | Zyg11a            | Ttc14                                   |
| Aar2               | Tifa             | Tcrb-J            | 0610010B08Rik///Gm14295///Gm14305///Gm: |
| Armcx2             | Evi2a-evi2b///Ev | Clk4              | Igf1r                                   |
| Ndn                | Sccpdh           | Nfic              | Slc2a9                                  |
| Bgn                | Chst15           | Siglec1           | Me2                                     |
| Rarres2            | Gnaz             | Ifnar2            | Add3                                    |
| Lox                | Btg4             | Pou2f1            | Fbxo22                                  |
| Ergic1             | Gnpda2           | Nf2               | Slc37a1                                 |
| Bcl2a1a///Bcl2a1b/ | Nrp2             | Smyd1             | Crtac1                                  |
| Mrpl42             | Zmynd11          | Psg19             | Ppp2r2b                                 |
| AU040096           | Zmynd11          | Zfp148            | Qpct                                    |
| Grin1              | Trp53            | A230006K03Rik/    | Xiap                                    |
| 1110057K04Rik      | Usp11            | Gm4736///Gm8      | Six3                                    |
| Ap1s2              | Endod1           | Lcn2              | Trib2                                   |
| Spata6             | Endod1           | Igk               | Trib2                                   |
| Rmdn1              | Endod1           | Tcf3              | Myh8                                    |
| Gm9222             | Mri1             | Cftr              | Ano10                                   |
| Ptov1              | Sidt1            | Rabac1            | Flna                                    |
| Rbm5               | Scpep1           | Nespas            | Sepn1                                   |
| Hhip               | 0610010B08Rik/   | LOC171588         | Unk                                     |
| Ankrd54            | Olfm1            | Ctse              | 9030624J02Rik                           |
| Vim                | Zfp553           | []                | Antxr2                                  |
| Pex6               | Slc2a9           | Slco1b2           | Calm1///Calm2///Calm3                   |
| Zdhhc14            | Me2              | Zfp260            | Tmco3                                   |
| Pcsk5              | Snapin           | Cebpb             | Slc6a15                                 |
| Ikzf4              | Atf2             | abParts///Igkv6-  | Slc46a1                                 |
| Cdk16              | Tspan10          | Hbb-b2            | Apbb2                                   |
| Ccdc102a           | Gab3             | Col3a1            | Cnn3                                    |
| Slc22a6            | Fbxo22           | Col3a1            | Ets1                                    |
| Cnn3               | []               | Gimap6            | Ptdss2                                  |
| Pfdn5              | Ttf1             | Vasn              | Des                                     |
| Acly               | Ndrgr4           | Pip5kl1           | Des                                     |
| Zbtb20             | Tlcd1            | Phpt1             | Fam43a                                  |
| Gm13102///Prame    | Tmem184c         | 1110037F02Rik     | Ckap4                                   |
| Nos1               | Kctd14           | Ssbp3             | Galnt2                                  |
| Masp1              | Six3             | Rhoq              | Ampd2                                   |
| Masp1              | Tcf7l2           | Srpx2             | Meg3                                    |
| Pgd                | Trib2            | Pdxk              | Oaz2                                    |
| Lasp1              | Ano10            | Lymr2             | 6330403K07Rik                           |
| Aplnr              | Sepn1            | Acyp2             | Pex5                                    |
| Mmd2               | Map3k3           | Dpyd              | Trim47                                  |
| Arf2               | Lrpap1           | Dpyd              | Dhx38                                   |
| Ptpn1              | Antxr2           | B9d2              | Rusc2                                   |
| Slc4a7             | Slc6a15          | Pcgf1             | Ptprs                                   |
| Gbp6               | Slc46a1          | Ccdc102a          | Sep-08                                  |
| Edn3               | Slc46a1          | Zfp689            | Sep-08                                  |
| Cbfa2t3            | Cnn3             | Efcab14           | Fmnl3                                   |
| Pklr               | Fam131a          | Cmip              | Ddx26b                                  |
| Osbp16             | Donson           | Col16a1           | Atg2a                                   |
| Calc1              | App2             | Rab12             | Nov                                     |
| Dpysl3             | Ampd2            | Cpa5              | Nov                                     |
| Ergic1             | Meg3             | BC028528          | Arhgef25                                |
| Trp53              | Oaz2             | Thtpa             | Inhbb                                   |
| Eftud2             | 6330403K07Rik    | Timm9             | Rbmx                                    |
| Tnfaip2            | Msl3l2           | Rasip1            | Ncam1                                   |
| Heyl               | Ptprs            | Map1lc3b          | Ncam1                                   |
| Maea               | Sep-08           | Pitpnc1           | Chst14                                  |
| Sccpdh             | Tprn             | Onecut3           | Srxn1                                   |
| Fdft1              | Psme4            | Ap3s2             | Slc25a45                                |
| Fibp               | Fmnl3            | Nudt16l1          | Jmjd1c                                  |
| Rasgrp2            | Ahcyl1           | Cacna1d           | Fndc3a                                  |
| Rasgrp2            | Ddx26b           | Rian///Rian///Ri: | Mndal                                   |
| Ampd2              | Nov              | Arap1             | Galnt7                                  |
| Iqcf3              | Nov              | Slc44a2           | Dapk1                                   |
| Acyp1              | Arhgef25         | Tmem158           | Itgb1                                   |
| Ufm1               | Inhbb            | 1110057K04Rik     | Rc3h2                                   |
| Adcyap1r1          | Inhbb            | Slitrk1           | Ccdc93                                  |
| Wipi1              | Rbmx             | Sh3bgrl           | BC005512///F630007L15Rik///Gm6958       |
| Nynrin             | Ncam1            | Tmcc2             | Medag                                   |
| Polr3f             | Ncam1            | Vps11             | Nova1                                   |
| Ahi1               | Chst14           | Manf              | Col6a2                                  |
| D17Wsu92e          | Slc25a45         | Rab2b             | Parp16                                  |
| Cops5              | Zfp191           | Lingo1            | Rps9                                    |
| []                 | Jmjd1c           | Atxn7l3b          | Pacs2                                   |
| Enpp3              | Mndal            | Lman1             | Axin1                                   |
| Lasp1              | Lss              | Cd47              | Rdh10                                   |
| Mmp2               | Dapk1            | Strada            | Uba7                                    |
| Slc9a3r2           | Scrn3            | G6pc3             | Uba7                                    |
| Wnt5b              | Rc3h2            | Snrnp40           | Gpr153                                  |
| Meg3               | Medag            | Eif1b             | Flywch1                                 |
| Ppp2r4             | Nova1            | Polr2l///Usp50    | Fnbp1                                   |
| Slc13a3            | Col6a2           | Pdlim7            | Cubn                                    |
| Psmc1              | Parp16           | Arxes1///Arxes2   | Arsg                                    |
| Med1               | Rps9             | Scfd1             | Fbxo2                                   |
| Lyz1               | Axin1            | Ebf3              | Plk2                                    |
| Twf2               | Rdh10            | Ppm1m             | Car9                                    |
| Lats2              | Gpr153           | Hba-a1///Hba-a2   | Nckap5l                                 |
| Slc52a2            | Os9              | Atraid            | Satb2                                   |
| Rnaseh2c           | 2310067B10Rik    | Pdpdf             | Tsnaxip1                                |
| Lct                | Cubn             | Nub1              | Ptprz1                                  |
| Pramel7            | Xpr1             | Col14a1           | Scara3                                  |
| Fgf11              | Fbxo2            | Bola1             | Lgr6                                    |

|                  |                        |                        |                                                |
|------------------|------------------------|------------------------|------------------------------------------------|
| Abhd11os         | Satb2                  | Spsb1                  | Htra3                                          |
| Syt2             | Scara3                 | Lphn1                  | Ace                                            |
| D9Ert26e         | Phyhipl                | Rarres2                | Slc39a14                                       |
| Slco5a1          | Htra3                  | Basp1                  | Penk                                           |
| Cbfa2t3          | Ace                    | Chn2                   | Mdfic                                          |
| Zfp771           | Slc39a14               | Chn2                   | Amph                                           |
| D18Ert232e       | Penk                   | Ppfia4                 | Acacb                                          |
| C76132           | Mdfic                  | Ppfia4                 | Abi3bp                                         |
| Brwd3            | Amph                   | Atg7                   | Abi3bp                                         |
| Dpp4             | Synpo                  | Cox20                  | Adamts15                                       |
| D2Ert127e        | Stard8                 | Elavl4                 | Snx21                                          |
| Kalrn            | Pcmt2                  | Tha1                   | Stard8                                         |
| C78878           | []                     | Pgp                    | Snx19                                          |
| C79122           | Ssr4                   | Nfam1                  | Mapre3                                         |
| []               | Zfp612                 | Gata2                  | A630072M18Rik                                  |
| []               | Myh3                   | Cd99                   | Maz                                            |
| C79452           | Fbxo4                  | Ptch1                  | Sifn4                                          |
| []               | Lrrc58                 | Nolc1                  | Cenpn                                          |
| []               | Adamts10               | Rftn2                  | Zbtb3                                          |
| C77691           | Iqsec1                 | Hmg20a                 | Tmem259                                        |
| DXErt242e        | Plekha6                | Tril                   | Ttc19                                          |
| Habp2            | Ccdc85a                | Ankzf1///Glb1          | Mttr3                                          |
| []               | Armcx4                 | Ptprd                  | Lrp2                                           |
| Zc2hc1c          | Mrps33                 | Limd2                  | Adamts10                                       |
| []               | 0610010B08Rik/,Msl2    |                        | Plekha6                                        |
| C78532           | Krt33b                 | Toposors               | Armcx4                                         |
| []               | Ldlrad4                | Zbtb46                 | Col14a1                                        |
| Gm6211           | Npr2                   | Mtf1                   | Psma8                                          |
| []               | Mustn1                 | Cdad1                  | Ldlrad4                                        |
| D12Ert216e       | Cep112                 | 5730408K05Rik/,Ldlrad4 |                                                |
| D3Wsu167e        | lfnz                   | Lrrc51                 | Efemp1                                         |
| D8Wsu26e         | Acsm2                  | Ikbp                   | Npr2                                           |
| C77815           | Gabrg1                 | 2610524H06Rik          | Brd8                                           |
| C77137           | Robo1                  | Anxa6                  | Atr                                            |
| []               | Dock6                  | Qrs1                   | Myo15b                                         |
| D7Bwg0826e       | Vcan                   | Qk                     | Cep112                                         |
| Nucks1           | Vcan                   | Rhoh                   | Krtap8-1                                       |
| Auh              | Six1                   | Rbpms                  | Pfkfb1                                         |
| Egfl8            | Scn2a1                 | Eny2                   | lfnz                                           |
| Zfp398           | Malat1                 | Tcf7l2                 | Klhl11                                         |
| Mrpl38           | Ddhd1                  | 2610301B20Rik          | Svs5                                           |
| []               | Dnm3os///Mir21         | Ptgr2                  | Robo1                                          |
| Ttl              | Cd48                   | Plscr1                 | Dock6                                          |
| []               | Enpp3                  | Rae1                   | Ddx4                                           |
| C78441           | Ptgir                  | Cep112                 | Vcan                                           |
| D17892           | A230046K03Rik          | Trappc4                | Vcan                                           |
| Cdca3            | Wipi1                  | Pmpcb                  | Scn2a1                                         |
| Fam46c           | Akna                   | Rtn1                   | Malat1                                         |
| Tbc1d24          | 2810474O19Rik          | Dtna                   | Ddhd1                                          |
| Gnao1            | Slc30a2                | Arl2bp                 | Sycp1                                          |
| Tfpt             | Sult1a1                | Cyp2c65                | Auts2                                          |
| LOC102640476///R | Zfp931                 | Tlk2                   | Dnm3os///Mir214                                |
| Nmrk1            | Kdm7a                  | Grb10                  | Cd48                                           |
| []               | 4930507D05Rik          | Rwdd3                  | Ptgir                                          |
| Rln1             | Fes                    | Cyp4f16///Cyp4f        | Wipi1                                          |
| AA408251         | Nlrp6                  | Ppp1r42                | Ighm                                           |
| Colq             | Abca8a                 | Wdr77                  | Cars                                           |
| D4Ert58e         | Hsd3b3                 | Gusb                   | Slc30a2                                        |
| Necap1           | Actn1                  | Eif2ak3                | Sult1a1                                        |
| Gdf9             | Lrrc2                  | Glb1                   | Gm10439///Gm15080///Gm15085///Gm15093          |
| Gusb             | Lbx1                   | Sulf2                  | Zc3h12a                                        |
| Enpp2            | Polr2f                 | Abcb9                  | Zfp931                                         |
| Igf2             | Slco1a5                | Pcdh18                 | Ighm                                           |
| Vcam1            | Dleu2                  | Sncaip                 | Dapk1                                          |
| Pnliprp2         | Suco                   | Auh                    | Kdm7a                                          |
| Sfrp2            | []                     | Vamp5                  | 4930507D05Rik                                  |
| Sav1             | Pip4k2b                | Ctnnb1                 | Hoxc6                                          |
| Lasp1            | Myo1b                  | Erh///LOC10105         | Hoxc6                                          |
| Slc22a17         | []                     | Dbf4                   | []                                             |
| Pdhd             | Hoxc6                  | Mrpl38                 | Fes                                            |
| Syng3            | Cpn2                   | Pfkb                   | Abca8a                                         |
| Lox              | Pigu                   | Pibf1                  | Trmt10a                                        |
| Bcl7b            | Ppp3cb                 | Msh5                   | Hsd3b3                                         |
| Gpd1             | Fbxl3                  | Mbd1                   | Irx6                                           |
| Clmp             | Leap2                  | LOC102641923//Lrrc2    |                                                |
| Clmp             | Lmod1                  | Scoc                   | Igf2os                                         |
| Fstl1            | Birc6                  | Mrpl3                  | Muc4                                           |
| Klhl13           | Abcb7                  | Gm21540///Tme          | Lbx1                                           |
| Tspan4           | Zfp81                  | Htatsf1                | Polr2f                                         |
| Ebf1             | Adam4                  | Plscr3                 | Slco1a5                                        |
| Slc1a1           | Arsi                   | Rabl3                  | Eno1///Eno1b                                   |
| Cmtm3            | Baiap3                 | Pcmt1                  | Scml4                                          |
| Bgn              | Adora2a                | Tmem33                 | Nkx6-2                                         |
| Crabp1           | Myh1                   | Auh                    | Cyb5r1                                         |
| Adprh            | Plekhs1                | []                     | Galnt6                                         |
| Tmem30a          | Arhgap20               | Cuedc2                 | Slc25a51                                       |
| Ccng2            | Mphosph8               | Hspa8                  | Six2                                           |
| Mylpf            | Fgfr1op2               | Tom1                   | Pip4k2b                                        |
| Mmp14            | Obsl1                  | Slc9a3r2               | Myo1b                                          |
| Sparc            | Zfp125                 | Fndc4                  | BC018473///BC018473                            |
| My12             | Zfp369                 | Mga                    | Igk-V28///Igk///Igkj1///Igkv4-53///Igkv6-23/// |
| Lrmp             | Sobp                   | Twf2                   | Bmp1                                           |
| Wfs1             | Uba1y                  | Stx18                  | Hspa5                                          |
| Sema3b           | Scml4                  | Tmod2                  | Atp1a2                                         |
| Aspn             | Slc26a3                | Parva                  | Usp12                                          |
| Frzb             | Prkca                  | Mbtps1                 | Ptprb                                          |
| Gyg              | Diap2                  | Polr2m                 | Scn7a                                          |
| Pcolce           | Utrn                   | Lrrk2                  | Srsf2                                          |
| Serpini1         | Srpr                   | Iqgap1                 | Plekhs1                                        |
| Chkb             | Chic1                  | Jam2                   | Epha7                                          |
| Ripk3            | Fbxw14                 | Stk39                  | Slc22a18                                       |
| Irf8             | Igk-V28///Igkv6-:Cxxc5 |                        | Obsl1                                          |

|                  |                 |               |                                           |
|------------------|-----------------|---------------|-------------------------------------------|
| Hsd3b1           | Rian            | []            | Sobp                                      |
| Kcnip1           | Hic2            | Sh3kbp1       | Slc26a3                                   |
| Acvr1            | Fgf6            | Uggt2         | Krtap16-3                                 |
| Ehbp1l1          | Rictor          | Dtnbp1        | Gstz1                                     |
| Nid1             | Zfp28           | Rnf219        | Kmt2d                                     |
| Olfml3           | Clcn1           | Gtf2i         | Mylk2                                     |
| Chst12           | Gm9798          | Gmfb          | Diap2                                     |
| Ggt1             | Zfp697          | Il17b         | Abcc5                                     |
| Thbd             | Tsix            | Lig3          | []                                        |
| Prl8a9           | Plekhh2         | Slc7a13       | 8430419L09Rik                             |
| Acy3             | Cacna1h         | Smcp1         | Clcn1                                     |
| Sdc2             | Sox14           | Sdccag3       | Tsix                                      |
| Lbp              | Ghrhr           | Ctrl          | Plekhh2                                   |
| Prlr             | Defb9           | Irak1bp1      | Boll                                      |
| Fam13c           | Itga4           | Cbx1          | []                                        |
| Zfp346           | Gm13583         | Hmgn3         | Cacna1h                                   |
| Rsrc1            | Fut10           | Ypel1         | Sox14                                     |
| Col6a1           | Sh3tc1          | Sema3b        | Ghrhr                                     |
| Crtap            | []              | Rgl3          | Itga4                                     |
| Wisp1            | Tmed8           | Exosc10       | Cul9                                      |
| Rhoc             | Herc2           | Emilin1       | []                                        |
| Lpar1            | Il22//Il1t1f6   | C1qtnf6       | Herc2                                     |
| Nt5c2            | BC038268        | Phf19         | Muc5b                                     |
| Slc14a1          | Ceacam1         | Mus81         | Ptprj                                     |
| Fam114a1         | Pappa           | Mllt3         | Ceacam1                                   |
| Enpep            | Kcnh7           | As3mt         | Cd55//Daf2                                |
| Lrp1             | Runx1t1         | Dnm2          | Pappa                                     |
| Speg             | []              | Ap2a2         | Runx1t1                                   |
| Pvrl3            | Il1rapl2        | Arhgap31      | []                                        |
| Rnf25            | Synj2           | Artn          | Arhgef2                                   |
| Camk2b           | Tcrb-J          | Smu1          | Runx1                                     |
| Podxl            | Ctbs            | Prdm5         | []                                        |
| Kcnk1            | Tssc4           | Ccdc132       | BC025933                                  |
| Cxcr4            | Tcrb-J          | Sh3gl3        | Clk4                                      |
| Tle6             | Siglec1         | Pign          | Siglec1                                   |
| Cpa3             | Kdm6a           | Prrx1         | Cit                                       |
| Cp               | Vmn1r45         | Eng           | Kdm6a                                     |
| Rbp1             | Zim3            | Toe1          | Pcdha1//Pcdha10//Pcdha11//Pcdha12//Pcc    |
| Col15a1          | Tpte            | Fbxo9         | Ifnar2                                    |
| S100a9           | Ifnar2          | Sh3kbp1       | Gnrhr                                     |
| Il2rb            | Gnrhr           | Ackr1         | Pou2f1                                    |
| Mog              | Smyd1           | Tlcd2         | Fech                                      |
| Slc35b1          | Nt5c1b          | Ap5s1         | Six4                                      |
| Gm16340//Ifi203/ | Cd80            | 1700074P13Rik | Ceacam1                                   |
| Gadd45gip1       | Chrng           | Prrx2         | Smyd1                                     |
| Slc12a2          | Ehd2            | Bmp7          | Cd80                                      |
| Runx1t1          | Dscam1          | Kansl1        | Psg19                                     |
| Cd200            | Gm12606         | Ak3           | Chrng                                     |
| Aldh1a3          | Lcn2            | Rnf19b        | Nfia                                      |
| Sema6b           | Dnm1            | Sf3a3         | Dscam1                                    |
| Cyp2f2           | abParts//Ighm   | Ube4b         | Acta1                                     |
| Elk3             | Art5            | 4933429H19Rik | Lcn2                                      |
| Cyp11a1          | Gm7040//Prl2c:  | Cd80          | Igkv1-117                                 |
| Gne              | Defb15          | []            | Art5                                      |
| Wnt5a            | Rabac1          | Tgm2          | Itgb1                                     |
| Myh6             | Defb7           | Cdk5r1        | Defb10                                    |
| Kank3            | Fgfr4           | Ttc7b         | Fgfr4                                     |
| Cdo1             | Fgfr4           | Tcf7          | Defb13                                    |
| Ltbp1            | Defb8           | Edil3         | Nespas                                    |
| Evc              | Defb35          | Epb4.1l2      | []                                        |
| Hp               | Usmg2           | Epb4.1l2      | LOC171588                                 |
| Cpxm1            | []              | Glt25d1       | []                                        |
| Mrps34//Nme3     | Krtap19-1       | Reep1         | []                                        |
| Ppap2b           | []              | Fli1          | []                                        |
| C1qtnf1          | Tyms            | Etnk1         | []                                        |
| Cd302            | Ids             | Rpl41         | Copg2os2                                  |
| Twist2           | []              | Gns           | []                                        |
| F13a1            | []              | Fam21         | []                                        |
| Gng11            | []              | Inpp5a        | Abcd4                                     |
| Plip             | []              | Ap2s1         | Pou2f1                                    |
| Tnfrsf1b         | Slco1b2         | Pank3         | Tmem189                                   |
| Cxxc5            | []              | Pcbp4         | Cebpb                                     |
| S100g            | Zfp260          | Timp2         | abParts//Igh-VJ558//Ighm//Ighv1-53//Ighv1 |
| Nfat5            | Tuba-rs1        | Snhg1         | abParts//Ighv6-13//Ighv6-14               |
| Tfap2c           | Krtap6-3        | Snhg1         | LOC102633540                              |
| Acadl            | Igh-VJ558       | Pld4          | Myh1                                      |
| Myo1b            | Igkv4-73//Ighv4 | 2210016L21Rik | abParts//Ighm                             |
| Myo1b            | abParts//Ighv6- | Zfp213        | Col3a1                                    |
| Rom1             | LOC101055909//  | Srp68         | Col3a1                                    |
| Cyth1            | Hbb-b2          | Cd38          | Gimap6                                    |
| Slc16a3          | LOC102633540    | Ubn1          | Vasn                                      |
| Gla              | Myh1            | Ldb3          | Maml2                                     |
| Fndc4            | Ptafr           | Calr          | Pdxk                                      |
| Retnla           | Defa15          | Dusp9         | Acyp2                                     |
| Nes              | Col3a1          | Abat          | Dpyd                                      |
| Hexa             | Col3a1          | Peg3          | Dpyd                                      |
| Rhou             | Gimap6          | AU020206      | B9d2                                      |
| Rhou             | Vasn            | Spag7         | Zkscan14                                  |
| Hsd11b1          | Tmem173         | Zik1          | Pcgf1                                     |
| Rab4a            | Ssbp3           | Pla2g1b       | Abhd10                                    |
| Tdh              | Rhoq            | Dhps          | Ccdc102a                                  |
| Slc2a2           | Vma21           | Fam117b       | Tgif2lx1//Tgif2lx2                        |
| Apcdd1           | Acyp2           | Pdap1         | Cacna1d                                   |
| Fbp2             | Dpyd            | Repin1        | Gm10436//Gm2042//Oog1                     |
| Gjc1             | Dpyd            | Synpo         | Efcab14                                   |
| Ccdc127          | B9d2            | Mul1          | Cmip                                      |
| Ebf2             | Ltn1            | Zg16          | Csad                                      |
| Ebf2             | Aipl1           | Prune         | Col16a1                                   |
| Upk3a            | Abhd10          | Tcf4          | Rufy2                                     |
| Gpx3             | Ccdc102a        | Tcf4          | Cpa5                                      |
| Socs2            | Cmtm8           | Fermt2        | BC028528                                  |
| Zfp90            | Zfp689          | Fermt2        | Mar-01                                    |

|                       |                       |                                        |
|-----------------------|-----------------------|----------------------------------------|
| Selplg                | Gm10436///Gm2Tmem151b | Scfd1                                  |
| Cd1d1                 | Gm10436///Gm2Tomm70a  | Krtap13-1                              |
| Cd1d1                 | Efcab14               | Fam174b                                |
| Sox18                 | Csad                  | Snhg11                                 |
| Gna11                 | Spin4                 | Ift27                                  |
| Chst1                 | Col16a1               | U2af1l4                                |
| Mmp12                 | Usp45                 | Fntb                                   |
| Col11a1               | Usp45                 | Eif3h                                  |
| Nr2c1                 | Rufy2                 | Prkar1b                                |
| Akap2                 | Cpa5                  | Coro2b                                 |
| Gpr65                 | BC028528              | S100b                                  |
| Ccna1                 | Snappc5               | Fez2                                   |
| Pglyrp1               | Saal1                 | Sfmbt2                                 |
| Cd5l                  | Mar-01                | Kpnb1                                  |
| St3gal5               | Scfd1                 | Faf1                                   |
| Pap0lb                | Pknnox2               | Mxd4                                   |
| Slc22a21              | Obp2a                 | Rnf157                                 |
| Rrbp1                 | Pitpnc1               | Morc4                                  |
| Ebi3                  | Tshz2                 | Stbd1                                  |
| Mapk8ip2              | Adam34                | Col5a1                                 |
| Hic1                  | Zfp937                | Ldhd                                   |
| Gata1                 | Fsip1                 | Ttyh2                                  |
| Bhlha15               | Otoa                  | Aard                                   |
| Fasl                  | Gm568                 | Cita                                   |
| Psg16                 | Ap3s2                 | Tmem56                                 |
| Cdh2                  | Zmym1                 | Hip1                                   |
| Ndp                   | Rian///Rian///Ri      | Rps6kc1                                |
| Spp1                  | Klra1                 | Ptdss2                                 |
| Ufm1                  | Tmem163               | Hsd17b11                               |
| Syt11                 | Slitrk1               | Ncan                                   |
| F5                    | Klhl7                 | Extl3                                  |
| Cadm3                 | 2510009E07Rik         | Ctbp2                                  |
| Mettl21a              | Sh3bgrl               | Rusc1                                  |
| 1700029P11Rik         | Rab2b                 | Ctrc                                   |
| Gpx2                  | Dynlt1f               | Coro2b                                 |
| Ntng1                 | Lingo1                | Cacng5                                 |
| Pde1a                 | Lman1                 | Mllt1                                  |
| Lrp5                  | Eef1d                 | Hexdc                                  |
| Sesn3                 | Usp9x                 | Hmgn3                                  |
| 2310061J03Rik         | Prkd3                 | Evl                                    |
| Dbn1d1                | Akirin2               | Tpcn1                                  |
| Zfpm2                 | Dynlrb1               | Morn4                                  |
| Tenm3                 | Tceb2                 | Sacs                                   |
| Rspo1                 | Klf9                  | Eif4ebp1                               |
| 1600015110Rik         | Klf9                  | Pi4ka                                  |
| Zfp235                | Map4k2                | Zfp787                                 |
| Fhl5                  | Gm10340///Gm1Spock2   |                                        |
| Xlr4a///Xlr4b///Xlr4c | Pcnp                  | Pitpnc1                                |
| Mpp6                  | Pdlim7                | Klhdc2                                 |
| Osr1                  | Ift80                 | Zfp362                                 |
| M1ap                  | Arxes1///Arxes2       | Stx18                                  |
| Trex2                 | Ppm1m                 | Unc5b                                  |
| Dcn                   | Hba-a1///Hba-a2       | Stmn3                                  |
| Tmprss2               | Eif4g2                | Tvp23a                                 |
| Ces2a                 | Zcchc3                | Elk3                                   |
| Nicn1                 | Spsb1                 | Atp1b2                                 |
| Pacsin1               | Lphn1                 | A230050P20Rik                          |
| Adssl1                | Zswim7                | B3galt6                                |
| Zfp37                 | Rarres2               | Tmem141                                |
| Hsd17b1               | Ddx10                 | Cox6b2                                 |
| Aoc3                  | Basp1                 | Dgcr2                                  |
| Rpl3l                 | Chn2                  | Sod1                                   |
| Chst7                 | Ppfia4                | Far1                                   |
| Pde9a                 | Ppfia4                | Gm21596///Gm21596                      |
| Ift81                 | Mrpl41                | Lpgat1                                 |
| Jam2                  | Pnpla2                | Lpgat1                                 |
| Fbxo36                | Atg7                  | Ndufaf4                                |
| Pde1b                 | Lysmd2                | Zfp651                                 |
| Anxa10                | Rit1                  | Ces1d                                  |
| Fkbp1b                | Ckmt2                 | Fam105a                                |
| Car3                  | Elavl4                | Ndn                                    |
| LOC102643023///N      | Slc10a6               | Ndn                                    |
| Cst10                 | Nckap1l               | Vwf                                    |
| Ptges                 | Pgp                   | Rhoc                                   |
| Ptges                 | Nfam1                 | Slc22a8                                |
| Asb13                 | Gata2                 | Chpt1                                  |
| Rbp7                  | H13                   | Bcl2l11                                |
| Clec3b                | Parm1                 | B3gnt9                                 |
| St6galnac5            | Rftn2                 | Bmp7                                   |
| Pkd2l2                | Tril                  | Ost4                                   |
| Dlx1                  | Slc9a3r2              | Ptprd                                  |
| Kcnmb4                | Slc9a3r2              | Fhod3                                  |
| Gpr12                 | Smpd5                 | Pcid2                                  |
| Slc2a10               | Ankzf1///Glb1l        | Cela3b                                 |
| Mmp7                  | Ankzf1///Glb1l        | Rasgrf1                                |
| Hist3h2ba///Hist3h    | Ptprd                 | Rpl12                                  |
| Stc2                  | Limd2                 | Il17d                                  |
| Dazl                  | Toporsos              | Snrpn///Snurf                          |
| Il27ra                | Zbtb46                | Rnaseh2c                               |
| Serf1                 | Sox17                 | Ift27                                  |
| Ttc28                 | Cdad1                 | Cebpzoz                                |
| Unc5c                 | 5730408K05Rik/,       | B4galt6                                |
| Fmo3                  | lkbip                 | Fam169a                                |
| Gdpd3                 | Pus3                  | Actr10                                 |
| Pcdhb7                | 2610524H06Rik         | Zbtb45                                 |
| Trps1                 | Anxa6                 | Fancf                                  |
| Leprel2               | Klf17                 | Cdc42bpa                               |
| Chrng                 | Bcl2l14               | Aplp1                                  |
| Msh5                  | Rbpms                 | Son                                    |
| Fgf18                 | Nanog                 | Chpt1                                  |
| Cntn1                 | Eny2                  | Itsn1                                  |
| Klb                   | 2610301B20Rik         | Tfb1m                                  |
|                       |                       | Dppa4                                  |
|                       |                       | Gm15498                                |
|                       |                       | Gm568                                  |
|                       |                       | BC028777                               |
|                       |                       | Igf1os                                 |
|                       |                       | Gprc6a                                 |
|                       |                       | Slc8a2                                 |
|                       |                       | Rian///Rian///Rian                     |
|                       |                       | Klra1                                  |
|                       |                       | ]                                      |
|                       |                       | Slitrk1                                |
|                       |                       | Klhl7                                  |
|                       |                       | Sh3bgrl                                |
|                       |                       | Manf                                   |
|                       |                       | Rab2b                                  |
|                       |                       | Lingo1                                 |
|                       |                       | Eef1d                                  |
|                       |                       | Prpf39                                 |
|                       |                       | Strada                                 |
|                       |                       | Bex4                                   |
|                       |                       | Eif1b                                  |
|                       |                       | Klf9                                   |
|                       |                       | Klf9                                   |
|                       |                       | Gm10340///Gm10406///Gm2888///Gm2897/// |
|                       |                       | Pdlim7                                 |
|                       |                       | Ebf3                                   |
|                       |                       | Ppm1m                                  |
|                       |                       | Hba-a1///Hba-a2                        |
|                       |                       | 2810025M15Rik                          |
|                       |                       | Col14a1                                |
|                       |                       | Bola1                                  |
|                       |                       | Spsb1                                  |
|                       |                       | Lphn1                                  |
|                       |                       | Zswim7                                 |
|                       |                       | Snhg5                                  |
|                       |                       | Rarres2                                |
|                       |                       | Basp1                                  |
|                       |                       | Ppfia4                                 |
|                       |                       | Ppfia4                                 |
|                       |                       | Pnpla2                                 |
|                       |                       | Atg7                                   |
|                       |                       | Atg7                                   |
|                       |                       | Lysmd2                                 |
|                       |                       | Cand1                                  |
|                       |                       | Vip                                    |
|                       |                       | Maoa                                   |
|                       |                       | Prpf38b                                |
|                       |                       | Ckmt2                                  |
|                       |                       | Tha1                                   |
|                       |                       | Nfam1                                  |
|                       |                       | Acot6                                  |
|                       |                       | Gata2                                  |
|                       |                       | Hddc2                                  |
|                       |                       | Dck                                    |
|                       |                       | Parm1                                  |
|                       |                       | Rftn2                                  |
|                       |                       | Ammechr1                               |
|                       |                       | Rbm25                                  |
|                       |                       | Hmg20a                                 |
|                       |                       | Tril                                   |
|                       |                       | Parp6                                  |
|                       |                       | Slc9a3r2                               |
|                       |                       | Slc9a3r2                               |
|                       |                       | Smpd5                                  |
|                       |                       | Ankzf1///Glb1l                         |
|                       |                       | 2610005L07Rik                          |
|                       |                       | Ptprd                                  |
|                       |                       | Ggct                                   |
|                       |                       | Limd2                                  |
|                       |                       | Nsun4                                  |
|                       |                       | Gpcpd1                                 |
|                       |                       | Itih5                                  |
|                       |                       | Zbtb46                                 |
|                       |                       | Mtf1                                   |
|                       |                       | Sox17                                  |
|                       |                       | Saal1                                  |
|                       |                       | 5730408K05Rik///Mir5136                |
|                       |                       | lkbip                                  |
|                       |                       | Dph7                                   |
|                       |                       | Pus3                                   |
|                       |                       | 2610524H06Rik                          |
|                       |                       | Qrs1l                                  |
|                       |                       | Rbpms                                  |
|                       |                       | Nanog                                  |
|                       |                       | Tcf7l2                                 |
|                       |                       | 2610301B20Rik                          |
|                       |                       | Calcoco2                               |
|                       |                       | Ppap2b                                 |
|                       |                       | Plscr1                                 |
|                       |                       | Rae1                                   |
|                       |                       | Cldn25                                 |
|                       |                       | Dppa4                                  |



|                   |                  |               |                                         |
|-------------------|------------------|---------------|-----------------------------------------|
| Trhr              | Ptdss2           | Taok3         | Trappc4                                 |
| Alpk3             | Ppap2b           | Scrn2         | Wrrnip1                                 |
| Tpm2              | Plscr1           | Tln1          | 1810009N02Rik                           |
| Emid1             | Cep112           | Kalrn         | Patz1                                   |
| Mras              | Dppa4            | 2310075K07Rik | DXBay18///Gm14685///Gm5639///Gm5640///G |
| []                | Mgme1            | Tcf7l1        | 1700017B05Rik                           |
| Pagr1a            | Trappc4          | Tle2          | Dtna                                    |
| Mark1             | Dppa2            | Vps53         | Arl2bp                                  |
| Fkbp10            | Eqtn             | Chd4          | Srgap2                                  |
| Prpf19            | Patz1            | Ppp1r15b      | Zbp1                                    |
| LOC101055763      | B930003M22Rik    | Zbtb12        | Rimklb                                  |
| Gpr137b           | Dtna             | Apoa4         | Cabyr                                   |
| Tufm              | Eral1            | 4932441J04Rik | Cdc42ep5                                |
| Tmem38b           | Pvr              | Rab40b        | Bcat1                                   |
| Oxsm              | Ahnak            | Pag1          | Reep6                                   |
| Oxsm              | Ppp6r3           | B130024G19Rik | Tmod2                                   |
| Nr5a2             | Tbata            | Ltbp4         | Grb10                                   |
| D8ErtD738e        | Cebpz            | 1700019G17Rik | Cyp4f16///Cyp4f37                       |
| AA522020          | Tlk2             | Slc35e4       | Aktip                                   |
| Slc19a1           | Ppp3cc           | Meg3          | Dqx1                                    |
| AA517023          | Rbm4b            | Nrep          | Me1                                     |
| Spsb1             | Tsnax            | Sorbs1        | Gusb                                    |
| Dntt              | Tmod2            | Cnn3          | Scyl1                                   |
| C76628            | Grb10            | Fam13c        | Glb1l                                   |
| []                | Cyp4f16///Cyp4f  | Klf9          | Pcdh18                                  |
| Tmem191c          | Cyp4f16          | Pgd           | Vps9d1                                  |
| Tbc1d14           | Aktip            | Slc7a4        | Bcl2l2                                  |
| Gadd45b           | Cep70            | Sox11         | Sncaip                                  |
| []                | Aqr              | Wnt5a         | Phka2                                   |
| AA517650          | Rps15a-ps6       | Surf4         | Vamp5                                   |
| AA414993          | Dock5            | Cdc42ep4      | Ctnnb1                                  |
| Frat1             | Gusb             | Sep-06        | Dbf4                                    |
| Dmc1              | Scyl1            | Ttl1          | Zkscan5                                 |
| Fgf2              | Eif2ak3          | Cnn3          | Tpp2                                    |
| Ptgfr             | Ccl27a///Ccl27b/ | Ccdc71l       | Mvk                                     |
| Pr13c1            | Glb1l            | Impa1         | Msh3                                    |
| 1700091H14Rik///C | Pcdh18           | Pkn1///Ptger1 | Pla2g7                                  |
| Sprr2f            | Anxa10           | Arl14ep       | Zfp943                                  |
| Gna14             | Bcl2l2           | Gabra1        | 4931406G06Rik///4931406G06Rik           |
| Scube1            | Igfbp1b          | Tmsb10        | Tcte2                                   |
| Golt1b            | Cd99             | Laptm5        | Golph3                                  |
| Higd1b            | Vamp5            | Rasal2        | 4933428G20Rik                           |
| Il4               | Ctnnb1           | Gpsm1         | Ptk2                                    |
| Hoxc9             | Dbf4             | Rab2b         | Mbd1                                    |
| Tbx18             | Nt5c3b           | Klf9          | Mbd1                                    |
| Bmp8a             | Zkscan5          | Wipf1         | Habp4                                   |
| Prkg1             | Crem             | Wipf1         | Tpmt                                    |
| Tmem47            | Mrpl38           | Pdgfrb        | Ube2s                                   |
| DcblD2            | Brox             | Sntb2         | Aqr                                     |
| Acr               | []               | Pfn2          | Farsb                                   |
| Grin3b            | MsantD3          | Trim43a       | Sqrdl                                   |
| Map3k6            | Zfp943           | Pla2g1b       | Mrpl3                                   |
| Clec4f            | Cyb5r3           | Tacr3         | Eci2                                    |
| Selp              | 2810040C05Rik    | Slc2a3        | PsmD11                                  |
| Cd209g            | Tcte2            | Igf2bp2       | Snca                                    |
| 4933425L06Rik     | AnkrD24          | Snx30         | Dtd2                                    |
| Cpeb4             | Golph3           | Wwtr1         | Styx                                    |
| Ilk               | Tmc1             | Pcolce        | Fbxo3                                   |
| Zfhx3             | Ptk2             | Tmsb10        | Rragd                                   |
| Lce1h             | Mbd1             | Gabbr1        | Hspa8                                   |
| Park2             | Mbd1             | Cbl1          | Syt1                                    |
| Spock3            | Tpmt             | Brd2          | Slc9a3r2                                |
| Gabrd             | Farsb            | Ccdc88a       | Agbl3                                   |
| Il11              | Mrpl3            | Xbp1          | Mga                                     |
| Gimap1            | Rcbtb2           | Marcks1       | Nono                                    |
| Prss29            | Arid4b           | Zfp110        | Clec2h                                  |
| Cacna2d1          | Arid4b           | D2hgdh        | Tmem263                                 |
| Ctnnb1            | Pitpnc1          | Ctnna1        | Twf2                                    |
| Ubqln2            | Rabl3            | Tgm2          | Ppp1r18                                 |
| Gtpbp1            | Hoxd8            | Impad1        | Tmod2                                   |
| B3gnt2            | Tmem33           | F2r           | Wfdc1                                   |
| Sdc3              | Stk35            | Trmt1         | Scara5                                  |
| Itga9             | Tma16            | Cnp           | Parva                                   |
| Dctn4             | Auh              | Scarb1        | Mphosph10                               |
| Timp2             | []               | Pgd           | Lrrk2                                   |
| Arx               | Enah             | Creb3l2       | Iqgap1                                  |
| Hs6st2            | Hspa8            | Igf1          | Preld1                                  |
| Maged1            | Sdccag8          | Igfbp4        | Stk39                                   |
| Fmn2              | Slc9a3r2         | Igfbp4        | Hoxa10                                  |
| Adcy7             | Agbl3            | P4hb          | Gm9757                                  |
| Celf2             | Gm3579           | Gh            | []                                      |
| Nrk               | Fndc4            | Polg          | Lypd1                                   |
| Nrk               | []               | Gnl2          | Dpp3                                    |
| Cxx1c             | Nono             | Mmp16         | Uggt2                                   |
| Ighmbp2           | Clec2h           | Gpr85         | Dtnbp1                                  |
| Acyp1             | 2610042L04Rik/   | Dtnb          | Gdi2                                    |
| Gna12             | Tmem263          | Bach2         | Cntfr                                   |
| Renbp             | Med24            | Irs3          | Capzb                                   |
| Gnaq              | Cldn25           | Glrx2         | Gtf2i                                   |
| Tcf7l1            | Tmod2            | Exosc4        | Gtf2i                                   |
| Scn1a             | Wfdc1            | Pitpnm1       | Gmfb                                    |
| Scn1a             | Scara5           | Alkbh5        | Il17b                                   |
| Ryr2              | Fam45a           | Lrrtm1        | Ralgps2                                 |
| Pofut1            | Rpgrip1          | Cntnap2       | Kazn                                    |
| Ncs1              | Slc9b1           | Eml5          | Lig3                                    |
| Wrn               | Parva            | Zbed3         | Herc4                                   |
| Ascl1             | Mbtps1           | RbmX          | Proz                                    |
| Brdt              | Mbtps1           | ArmCX2        | P2ry12                                  |
| Cicnka            | Jam2             | Ndn           | Bnip2                                   |
| Gnas              | Preld1           | Zfp944        | Mto1                                    |
| Gys1              | Stk39            | Bgn           | Slc7a13                                 |
| Smyd1             | LOC100049077     | Btbd17        | Irak1bp1                                |

|                     |                |                      |                              |
|---------------------|----------------|----------------------|------------------------------|
| Elmo1               | Cxc5           | Rarres2              | Hmgn3                        |
| Bmp15               | Hoxa10         | Ergic1               | Ypel1                        |
| 4933417A18Rik       | Gm10817        | Mea1                 | Ypel1                        |
| Col4a3              | Gm17748///Ppih | Rapgef3              | Sema3b                       |
| Insr                | Cd164          | Grin1                | Itih4                        |
| Prlr                | Gm9757         | Tsr3                 | Slc6a9                       |
| Scamp5              | []             | Hsp90b1              | Tex9                         |
| Otud7a              | Lypd1          | Ptov1                | Rgl3                         |
| Lnx1                | Sh3kbp1        | Rbm5                 | Hmgcs2                       |
| Onecut1             | Dpp3           | Hhip                 | Emilin1                      |
| Stat5a              | Uggt2          | Vim                  | C1qtnf6                      |
| Chka                | Angel2         | Fdps                 | Phf19                        |
| Scn10a              | Kcnk10         | 2610002J02Rik        | Mus81                        |
| Pcdhb11             | Rnf219         | Flot2                | Pdss1                        |
| Rrh                 | Ica1           | Pmf1                 | Foxa3                        |
| Pde3a               | Tcrb-J         | Ankef1               | Pde3a                        |
| Hormad1             | Cntfr          | Fam109b              | Ldlr                         |
| Vax2                | Gtf2i          | Cdk16                | Sep-06                       |
| Zp1                 | []             | Ccdc102a             | As3mt                        |
| H2afy3              | Ipo5           | Cnn3                 | Hif1a                        |
| Astn2               | Lig3           | Ddx47                | Arhgap31                     |
| Pcdhb13             | Srgap1         | Lrrc20               | LOC102641289///Tbc1d14       |
| Angpt4              | Fmn2           | Zbtb20               | Artn                         |
| LOC100043315        | Tmem80         | Gm13102///Prar       | Neurog3                      |
| Arr3                | Bnip2          | Masp1                | Smu1                         |
| Il10                | Mto1           | Masp1                | Prdm5                        |
| Pcdhb8              | Pdzd9          | Zdhhc14              | Entpd7                       |
| Ptger3              | Ush2a          | Sfrp1                | Cyp1b1                       |
| Jdp2                | Irak1bp1       | Pgd                  | Sh3gl3                       |
| Ptdss2              | Cbx1           | Tnp1                 | Pcgf6                        |
| Prop1               | Sema3b         | Lasp1                | Prrx1                        |
| Epdr1               | Cyp2d13        | Fam227b              | Tex13                        |
| Nf2                 | Synj2          | Slc4a7               | Slc9b1                       |
| Abca1               | Rgl3           | Edn3                 | Eng                          |
| Slc22a5             | Emilin1        | Cbfa2t3              | AK010638///Gm14820///Gm14820 |
| Pde6a               | Angpt2         | Calc1                | Tlcd2                        |
| Cbx5                | C1qtnf6        | Trp53                | Ost4                         |
| Kdelc1              | Phf19          | Calm1///Calm2/,Prrx2 |                              |
| Il18bp              | Foxa3          | Spata5               | Sync                         |
| Ncam1               | Pde3a          | Tnfaip2              | Epha1                        |
| Ncam1               | Pigq           | Gmcl1                | Bmp7                         |
| Gfra1               | Neu2           | Maea                 | Fbxw2                        |
| Dnaaf1              | As3mt          | Fdft1                | Ak3                          |
| Nr1h3               | Ap2a2          | Rasgrp2              | Ms4a10                       |
| Socs1               | Arhgap31       | Rasgrp2              | Pde10a                       |
| Rilpl1              | Artn           | Ndn                  | Nnmt                         |
| Spock2              | Exosc1         | Ampd2                | Nup54                        |
| Pde6g               | Prdm5          | Tfpt                 | 4930507D05Rik                |
| Crhr2               | Dnaja3         | Zdhhc14              | 2900097C17Rik                |
| Cmpk2               | Entpd7         | Flywch2              | Adam1b                       |
| Vsx1                | Sh3gl3         | Nfat5                | Prrg2                        |
| Kiss1r              | Pign           | Ddx17                | Psmc7                        |
| Klrk1               | Prrx1          | Mark4                | []                           |
| Mthfr               | Ttc14          | Wipi1                | Nkx2-4                       |
| Cacna1a             | Eng            | Nynrin               | Mcm10                        |
| Hnf4g               | Sox5           | Ahi1                 | Tgm2                         |
| Cacng3              | Erc8           | Tsc22d1              | Mela                         |
| Cldn9               | Sh3kbp1        | H2-T10///H2-T2z      | Cdk5r1                       |
| B3galt5             | Ikbkb          | Pfkl                 | Cdk5r1                       |
| B3galt1             | Itgav          | []                   | Ttc7b                        |
| Plagl1              | 1700074P13Rik  | Lin7b                | Pi4k2a                       |
| Krtap12-1           | Prrx2          | []                   | Tcf7                         |
| Cma2///Mcpt9        | Sync           | Enpp3                | Edil3                        |
| Magea1///Magea2,Spr |                | Ddit4l               | Epb4.1l2                     |
| Ammecr1             | Epha1          | Mmp2                 | Epb4.1l2                     |
| Ifna1               | Bmp7           | Slc9a3r2             | Reep1                        |
| Col2a1              | Pdcl2          | Slc9a3r2             | Fli1                         |
| Bfsp1               | Nnmt           | Sf3b5                | Etnk1                        |
| Bdkrb1              | 4933429H19Rik  | Sumo3                | Rpl41                        |
| Olfr68///Olfr69     | Sec62          | Wnt5b                | Acsl4                        |
| Vmn1r53             | 2900097C17Rik  | Meg3                 | Mbp                          |
| Olfr1508            | Adam1b         | Ppp2r4               | Marveld1                     |
| Ifnab               | Mdn1           | Myadm                | Cdc37l1                      |
| Ifna5               | Nfatc4         | Vps9d1               | Sox4                         |
| Pdia4               | Elavl2         | Gpd1                 | Inpp5a                       |
| Col5a2              | Nacc1          | Qsox1                | Coq10a                       |
| Slc2a8              | Rptn           | Lats2                | Pld4                         |
| Vim                 | Tgm2           | Rnaseh2c             | 2210016L21Rik                |
| Myo10               | Pnlip          | Atg12                | Cry1                         |
| Ctsk                | Prss2          | Uhrf1bp1             | Trio                         |
| Spz1                | Ttc7b          | Myrf                 | S100ppb                      |
| Adamts5             | Tcf7           | Crxos                | Nisch                        |
| Nfic                | Edil3          | Slc8a1               | Rhbdd3                       |
| Dbh                 | Epb4.1l2       | Slco5a1              | Ube2o                        |
| Tagln3              | Epb4.1l2       | Cbfa2t3              | Ldb3                         |
| Etv1///Gm5454       | Reep1          | Zfp771               | Calr                         |
| Rgs17               | Fli1           | D18Ert232e           | Dusp9                        |
| Dusp2               | Etnk1          | Zfp518b              | Abat                         |
| Hfe                 | Etnk1          | C76132               | Atp2b2                       |
| Scg2                | Acsl4          | Dpp4                 | Spag5                        |
| Defa5///Gm10104/    | Gns            | C76554               | AU020206                     |
| Kcnj9               | Dab2ip         | C79242               | Tufm                         |
| Sh2b2               | Prss2          | Kalrn                | Cdh5                         |
| Fam126a             | 1190002N15Rik  | C78878               | Rrnad1                       |
| Tnfrsf21            | Gm6682///Tuba: | C79122               | Tle1                         |
| Sec16b              | Fam21          | Dhrs7b               | Cerk                         |
| Tbl1xr1             | Inpp5a         | []                   | Repin1                       |
| Pafah1b2            | Coq10a         | AA511254             | Mafg                         |
| Cdh11               | Pcbp4          | D15Ert30e            | Mthfr                        |
| Bmp6                | Timp2          | []                   | Atg9b                        |
| Ing3                | Pld4           | C80060               | Tcf4                         |
| Zfp191              | Ppp1r3c        | C77691               | Tcf4                         |

|                         |                 |                |                     |
|-------------------------|-----------------|----------------|---------------------|
| 3632451006Rik           | Cry1            | DXErt242e      | Mettl7a1///Mettl7a2 |
| Fut9                    | S100pbp         | Zc2hc1c        | Mettl7a1            |
| Reck                    | Ldb3            | C78532         | Khdc1b              |
| Trip4                   | Mobp            | []             | Ece1                |
| Saa1                    | Sun2            | []             | Fermt2              |
| Atoh7                   | Ppp4r2          | []             | Fermt2              |
| Adam21                  | Abat            | C78948         | Prss35              |
| Bcl2a1a///Bcl2a1b/Syt17 |                 | D7Bwg0826e     | Atpif1              |
| Lyz1                    | Peg3            | Arl5a          | Tmem151b            |
| Saa3                    | Zik1            | Maf            | Rrp12               |
| Hoxc5                   | Pla2g1b         | Auh            | Gba2                |
| Serpinh1                | Cdh5            | []             | Fam174b             |
| Col1a2                  | Fermt3          | []             | Snhg11              |
| Dclk1                   | Ccdc50          | C78441         | Eif3h               |
| Lipa                    | Pdap1           | D1Ert275e      | Eif3h               |
| Cfh                     | Repin1          | Npr3           | Prkar1b             |
| Gpr137b                 | Mafg            | Tbc1d24        | Coro2b              |
| Tmem167                 | Arf4            | LOC102640476// | Uqcr10              |
| Src                     | Mthfr           | Tm4sf1         | S100b               |
| Tgfb2                   | Rufy1           | []             | Fez2                |
| Tgfb2                   | Tcf4            | Rln1           | Sfmbt2              |
| Hdgfrp3                 | Tcf4            | AA408251       | Kpnb1               |
| Igfbp1                  | Khdc1b          | Ctr9           | Map3k14             |
| Tceal3///Tceal5///1     | Khdc1b          | D5Ert2102e     | AW112010            |
| Gadd45b                 | Fermt2          | Trim27         | Gbp7                |
| Cacng4                  | Fermt2          | Necap1         | Tgif2               |
| Gpc3                    | Ppp2r5c         | Uba1           | Spred2              |
| Meis1                   | Ndufs8          | Gusb           | Crybg3              |
| Xdh                     | []              | Slc19a1        | Rnf157              |
| Rnf151                  | Fam174b         | Pald1          | Samhd1              |
| Slc29a3                 | Ibtk            | Enpp2          | Arhgap39            |
| Ror1                    | Snhg11          | Igf2           | BC003331            |
| Hcn3                    | Ift27           | Sdc1           | Col5a1              |
| Bcl2l2                  | U2surp          | Rab7           | Mef2d               |
| Fhl4                    | Eif3h           | Spt1           | Plk3                |
| Trpc4                   | Prkar1b         | Ehd1           | Ldhb                |
| Syt13                   | Coro2b          | Cd24a          | Ttyh2               |
| Itm2a                   | Uqcr10          | Fkbp1a         | Papss2              |
| Zfp474                  | S100b           | Sfrp2          | Aard                |
| Pex5l                   | Fez2            | Lasp1          | Cpd                 |
| Aars                    | Sfmbt2          | Cox8a          | Hip1                |
| Ggt7                    | Kpnb1           | Lox            | Rps6kc1             |
| Esyt1                   | AW112010        | Ldhb           | []                  |
| Vash2                   | Rnf157          | Hmox1          | Slc38a10            |
| Aacs                    | Cox17           | Bcl7b          | Nrf1                |
| Fbln1                   | Aqp4            | Clmp           | Hsd17b11            |
| Pink1                   | Atcay           | Clmp           | Ctbp2               |
| Cyhr1                   | BC003331        | Surf4          | Hlf                 |
| Celf2                   | Dusp3           | Slc29a2        | Hlf                 |
| Lrrc49                  | Col5a1          | Fstl1          | Coro2b              |
| Nrros                   | Mef2d           | Klhl13         | Sema5a              |
| Aen                     | Ldhb            | C1qbp          | Cacng5              |
| Crabp2                  | Ttyh2           | Tspan4         | Pkig                |
| Scara5                  | Slc4a1          | Pold2          | Hmgn3               |
| Rerg                    | Papss2          | Plrg1          | Kctd12///Mir5130    |
| Jkamp                   | Wdr77           | Hsd17b10       | Slc25a4             |
| Pxk                     | Anp32a          | Ebf1           | Evl                 |
| Fabp4                   | Hip1            | Slc1a1         | Hspb7               |
| Frmd6                   | Sema4d          | Pcsk2          | Tpcn1               |
| Tram1l1                 | Hsd17b11        | Pycr2          | Dnajc27             |
| Ntmt1                   | Cldn3           | Cmtm3          | Sacs                |
| Aif1l                   | Lrrc8a          | Plin2          | Eif4ebp1            |
| Dclk1                   | Ddrgk1          | Smoc1          | Pi4ka               |
| Gm11787///Lyn           | Ctbp2           | Bgn            | Tmem27              |
| Abhd14b                 | Ero1lb          | Rnps1          | Pitpnc1             |
| Zfp521                  | Ids             | Crabp1         | Tvp23a              |
| Plac8                   | Sema5a          | Adam3          | Ugcg                |
| Spon1                   | Cacng5          | Pex19          | Elk3                |
| Tmem119                 | Vamp4           | Adprh          | Leng8               |
| Polr3gl                 | Foxo3           | Drg1           | Eomes               |
| Alg1                    | Hexdc           | Cfl1           | Sox3                |
| Comm5                   | Cox17           | Asl            | A230050P20Rik       |
| Ugt3a1                  | Kctd12///Mir513 | Rpn1           | N6amt2              |
| Aamdc                   | Mtdh            | Ccng2          | Irf3                |
| Dnajc24                 | Slc25a4         | Stx1a          | Cox6b2              |
| Pcsk5                   | 0610005C13Rik   | Dctn6          | Dgcr2               |
| Dhx58                   | Rab6b           | Lgals3bp       | 1110004E09Rik       |
| Slit2                   | Evl             | Mmp14          | Kif11               |
| Chodl                   | Phf2            | Pofut2         | Tti2                |
| Antxr1                  | Hspb7           | Sparc          | Psma6               |
| Gca                     | Tpcn1           | Sfrp1          | Psma6               |
| Thns12                  | Neo1            | Tln1           | Lpgat1              |
| Ifnar2                  | Morn4           | Eid1           | Fam105a             |
| Prr5                    | Dnajc27         | Wfs1           | Ndn                 |
| Plxnd1                  | Sacs            | Sema3b         | Ndn                 |
| Tmem53                  | Ccl27a          | Aspn           | Vwf                 |
| Cadps2                  | Pi4ka           | Frzb           | Mip                 |
| Ushbp1                  | Cela3b///Gm130  | Sardh          | B3gnt9              |
| Mef2c                   | Spock2          | Nbl1           | Fcgr2b              |
| Mef2c                   | Pitpnc1         | Asb6           | Bmp7                |
| Serpina1b               | Klhdc2          | Pcolce         | Adora1              |
| Tmem82                  | Unc5b           | Vps28          | Kctd17              |
| Steap1                  | Dnajc27         | Ripk3          | Ptprd               |
| Chil1                   | Tvp23a          | Irf8           | Phka1               |
| Krt84                   | Ugcg            | Acvr1          | Dab1                |
| Gm16340///Ifi203/       | Elk3            | Ehbp11         | Rasgrf1             |
| Zbtb20                  | Crebrf          | Nid1           | Hs3st3a1            |
| Ppp6r2                  | Tsr2            | Fbp1           | Herpud1             |
| Tulp1                   | Eomes           | Vars           | 2610528A11Rik       |
| Mmgt2                   | Sox3            | Olfml3         | Rpl12               |
| Sphk1                   | A230050P20Rik   | Chst12         | Abcc5               |
| Tmprss11d               | Gjc2            | Med20          | Il17d               |

|                    |                |                 |                                         |
|--------------------|----------------|-----------------|-----------------------------------------|
| A530016L24Rik      | BC023829       | Adck4           | Rnaseh2c                                |
| Amelx              | B3galt6        | Tspan6          | Fgf14                                   |
| Lmbrd1             | Irf3           | Slc16a7         | B4galt6                                 |
| Mrpl15             | Cox6b2         | Ptprcap         | Fam169a                                 |
| Rprd1a             | Far1           | Nphp1           | Csprs///Gm15433///Gm2666///Gm7609///LOC |
| Ighg               | Psm6           | Thbd            | Eif4e2                                  |
| Airn               | Lpgat1         | Ttc1            | Cdc42bpa                                |
| Armc1              | Lpgat1         | Rsrp1           | Aplp1                                   |
| Fam161a            | Pyhin1         | Acy3            | Son                                     |
| Alas2              | Pyhin1         | Klc1            | Elavl3                                  |
| Srxn1              | Ndufaf4        | Crat            | Cd300a                                  |
| Amelx              | Stau1          | Sdc2            | Gbp2                                    |
| Cant1              | Zfp651         | Rassf3          | Atp1a1                                  |
| Ednra              | Fam105a        | Lbp             | Atp1a1                                  |
| Fgf12              | Ndn            | Prlr            | Tfb1m                                   |
| Evc                | Ndn            | Fam13c          | Dpep1                                   |
| Cmtm7              | Vwf            | Bid             | Zc3h3                                   |
| Oprm1              | Rhoc           | Upp1            | LOC102643254///Rps6///Rps6-ps4          |
| Oscar              | Chpt1          | Mlec            | Taok3                                   |
| Prpf4b             | B3gnt9         | Rsrc1           | Gmppa                                   |
| Pik3r1             | Bmp7           | Gtf2h4          | Nav2                                    |
| Wbp1l              | Kctd17         | Col6a1          | Sugp2                                   |
| Znhit1             | Ptprd          | Crtap           | Meg3///Meg3                             |
| Apobec1            | Phka1          | Wisp1           | Kalrn                                   |
| Flt1               | Pcid2          | Wisp1           | Fcho1                                   |
| Lamc3              | Sephs2         | Bex1            | Slc6a17                                 |
| Slc20a2            | Cela3b         | Pygm            | Gm20559                                 |
| Pcdha1///Pcdha10   | Rasgrf1        | Rhoc            | E2f8                                    |
| Tpcn1              | Il17d          | Lpar1           | Mbp                                     |
| Ddx60              | Snrpn///Snurf  | Nampt           | Simc1                                   |
| Nfatc2ip           | Vimp           | Nt5c2           | Tle2                                    |
| F11                | Ift27          | Ccs             | Otud5                                   |
| Tfpi               | Fgf14          | Cd2bp2          | 1600014C10Rik                           |
| Tfpi               | B4galt6        | Spata5          | Pthr1                                   |
| Tom1l2             | Ctps2          | Wdr12           | 2700079J08Rik                           |
| Adam22             | Fancf          | Fam114a1        | Ppp1r15b                                |
| Suv420h1           | Cdc42bpa       | Enpep           | Zbtb12                                  |
| Scrn2              | Smarcb1        | Mtch2           | Rps10                                   |
| Btn1a1             | Aplp1          | Lrp1            | Tfap2c                                  |
| Nox4               | Chpt1          | Cacnb3          | 1700097N02Rik                           |
| Prlr               | Itsn1          | Speg            | Kdelc1                                  |
| Nebi               | Itsn1          | Arfgap2         | Ptgs1                                   |
| Lmn2               | Atp1a1         | Pvrl3           | Rab2a                                   |
| Prlr               | Dpep1          | Emc8            | Rps24                                   |
| Csn3               | Taok3          | Kcnk1           | Rab40b                                  |
| Notum              | Nlk            | Heph            | Pag1                                    |
| Trim30a            | Nav2           | G0s2            | Bola2                                   |
| Nxn2               | Mfsd4          | Cxcr4           | B130024G19Rik                           |
| Arhgap6            | Meg3///Meg3    | Rngtt           | Ltbp4                                   |
| AF366264           | Kalrn          | Gcdh            | Rundc3a                                 |
| Eda                | Al118078       | Lamtor1         | Gm10193///Zfp706                        |
| Sema6c             | Slc6a17        | Snapc2          | Ceacam11                                |
| Mx1                | Csn1s2a        | Sep-04          | Sorbs1                                  |
| Ubxn10             | 1110054M08Rik  | Ctsb            | Cnn3                                    |
| Sec14l1            | Ndr4           | Cp              | Fam13c                                  |
| Ace                | 2310075K07Rik  | Cp              | Klf9                                    |
| Fgfr1              | Tcf7l1         | Calb1           | Pgd                                     |
| Hyou1              | Tmem71         | Rangrf          | Ogt                                     |
| Nfat5              | Tle2           | Galns           | Sox11                                   |
| Rftn2              | D830044I16Rik  | Lor             | Wnt5a                                   |
| Mrgpra4            | []             | Plek            | Gm5451///Rpl9                           |
| Vrk2               | Rnf207         | Plek            | Cdc42ep4                                |
| H2-D1              | Dstyk          | Ap3m2           | Scyl1                                   |
| Srpx               | Vps53          | Rbp1            | Sep-06                                  |
| Fcgr2b             | Pdxdc1         | Col15a1         | Cnn3                                    |
| Tnfsf11            | Tfap2c         | Pml             | Snca                                    |
| Cabyr              | Ipo4           | Fyn             | Il7                                     |
| Igh-VJ558///Ighg// | Kdelc1         | Slc35b1         | Tacc3                                   |
| Vegfa              | Zfp260         | Gm16340///Ifi2C | Sfpq                                    |
| Loxl1              | Rps24          | Runx1t1         | Rasal2                                  |
| Casd1              | H1fx           | Cd200           | Gpsm1                                   |
| Irx1               | Map3k3         | Aldh1a3         | Rab2b                                   |
| Mapre2             | Pag1           | Cyp2f2          | Adcy3                                   |
| Mapre2             | []             | Elk3            | Adcy3                                   |
| Epha7              | Spry2          | Cyp11a1         | Klf9                                    |
| Ldb3               | Inpp4a         | Ptgis           | Wipf1                                   |
| Rbm14              | Lonp2          | Wnt5a           | Wipf1                                   |
| Calca              | 1700019G17Rik  | Ube2j1          | AK077428                                |
| Gm8539///Zbtb8os   | Riok2          | Angpt2          | Pdgrfb                                  |
| Vamp7              | Gm10193///Zfp7 | E2f6            | Rbm14                                   |
| Atp10a             | Gm10193///Zfp7 | Kank3           | Sntb2                                   |
| Igf1               | Hbb-y          | Cdo1            | Lyz1                                    |
| Baalc              | Clcc1          | Cxcl13          | Sh3bgrl                                 |
| Prkar1a            | Sorbs1         | Icam2           | Pla2g1b                                 |
| Col4a1             | Wnk1           | Ltbp1           | Rbm14                                   |
| Zbtb8a             | Cnn3           | Zhx1            | Skp2                                    |
| Thap7              | Klf9           | Evc             | Snd1                                    |
| Dcun1d1            | Luc7l2         | Hp              | Mapk8                                   |
| Zbed3              | Luc7l2         | Gtf2e2          | Slc2a3                                  |
| Chst15             | Arhgef40       | Cpxm1           | Api5                                    |
| Arl16              | Psm1           | Sep-15          | Phyhipl                                 |
| Igfbp5             | Psm1           | Mrps34///Nme3   | Timp2                                   |
| Pth2r              | Slc7a4         | Thop1           | Lats2                                   |
| Snrpb2             | Acp2           | Ppap2b          | Igf2bp2                                 |
| Tmem175            | Sox11          | C1qtnf1         | Gm15393///Gm15393                       |
| Slc6a1             | Wnt5a          | Cd302           | Wwtr1                                   |
| H6pd               | Ttll1          | Twist2          | Rbpms                                   |
| Chpf2              | Cnn3           | Gng11           | Pcolce                                  |
| Jade1              | Impa1          | Chd3os          | Gabbr1                                  |
| Meg3               | Il7            | Cxc5            | Ccdc88a                                 |
| Pde2a              | Doc2a          | S100g           | Xbp1                                    |
| Mndal              | Sfpq           | Coprs           | D2hgdh                                  |

|                      |                  |                  |                                            |
|----------------------|------------------|------------------|--------------------------------------------|
| Medag                | Tmsb10           | Klk6             | Dcun1d5                                    |
| Prickle1             | Pcm1             | Myo1b            | Clcf1                                      |
| Col6a2               | Cacnb4           | Myo1b            | Clcf1                                      |
| Nbea                 | Gpsm1            | Ina              | Ctnna1                                     |
| Mtmer9               | Atp7a            | Rom1             | Tgm2                                       |
| Cidec                | Rab2b            | Fndc4            | Exosc10                                    |
| Tenc1                | Gm15776///Gng    | Gm10349///Gm5    | Adrb2                                      |
| Cubn                 | Klf9             | Hexa             | F2r                                        |
| Zfand3               | Wipf1            | Ifnar1           | Uba7                                       |
| Farp1                | Wipf1            | Rnf128           | Xpa                                        |
| Tmem106b             | Nsmf             | Creml            | Aldh18a1                                   |
| Slit3                | Pdgfrb           | Hsd11b1          | Cela3b///LOC102641402                      |
| Lrp2                 | Pfn2             | Naga             | Aldh18a1                                   |
| Pvt1                 | Lyz1             | Eef1e1           | Krt13                                      |
| Iqsec1               | Sh3bgrl          | Josd2            | Coq3                                       |
| Mxra8                | Trim43a          | Rab4a            | Ddx39b                                     |
| Ccdc85a              | Becn1            | Pcbp4            | Gtf2h4                                     |
| Adamts7              | Rapgef3          | Pcbp4            | Scarb1                                     |
| Ldlrad4              | Pla2g1b          | Gli1             | Pgd                                        |
| Lmod2                | Snd1             | Sec22b           | Slc52a2                                    |
| Ifi204///Ifi205///M  | Slc2a3           | Apcdd1           | Creb3l2                                    |
| Ifi205///Mnda        | Prm1             | N6amt2           | Aldh9a1                                    |
| 2810459M11Rik        | Phyhipl          | Tex40            | Igf1                                       |
| Rai2                 | Zbed3            | Hdac2            | Igfbp4                                     |
| Zfp444               | Lats2            | Ces1d            | []                                         |
| Malat1               | Igf2bp2          | Ccdc91           | Trim12a                                    |
| Epha7                | Mrpl11           | Gjc1             | Clu                                        |
| Dnm3os///Mir214      | Foxm1            | Ccdc127          | P4hb                                       |
| Enpp3                | Tmx1             | Txnrd2           | Unc13a                                     |
| Wipi1                | Rbpms            | Pard6a           | []                                         |
| Spag4                | Pcolce           | Gpx3             | Serinc1                                    |
| Fes                  | Pdlim1           | Socs2            | Gm7040///Prl2c2///Prl2c3///Prl2c4///Prl2c5 |
| Igk-V28///Igkc///Igl | Tmsb10           | Dtymk            | Sgcg                                       |
| Heatr1               | Gabbr1           | Arih2            | []                                         |
| Pclo                 | Eif3m            | Zfp90            | []                                         |
| Lpar4                | Ccdc88a          | Cd1d1            | Polg                                       |
| Tfpi                 | Xbp1             | Cd1d1            | Gnl2                                       |
| Gm21451///Loxl2      | Nmd3             | Spic             | Mmp16                                      |
| Tnfsf12///Tnfsf12T   | Hnrnp1           | Sox18            | Gcnt2                                      |
| Atp8b2               | Clcf1            | Ostc             | Gpr85                                      |
| Atp11c               | Clcf1            | Chst1            | Aldh18a1                                   |
| Usp9y                | Tgm2             | Col11a1          | B3galt2                                    |
| Sox5                 | Cela3b///LOC102  | Sigirr           | Snhg1                                      |
| Cd247                | Cnp              | Akap2            | Cux1                                       |
| Epb4.112             | Pttg1ip          | Pdlim3           | Clu                                        |
| []                   | Bscl2            | Pdc              | D1Pas1                                     |
| Ofa                  | Ovca2            | St3gal5          | Rad23a                                     |
| []                   | Coq3             | Slc22a21         | Exosc4                                     |
| []                   | Ddx39b           | Hic1             | Pitpnm1                                    |
| Rprd1b               | Fgd1             | Rnf138rt1        | C1qb                                       |
| Gm9780///Plac9a/     | Scarb1           | Cdh2             | Alkbh5                                     |
| Adamts4              | Slc52a2          | Actrt2           | Omt2a                                      |
| Ssbp1                | Igf1             | Ndp              | Lrrtm1                                     |
| Pcbd2                | Igfbp4           | Spp1             | Cpeb3                                      |
| Lrrtm1               | Igfbp4           | F5               | Igfbp7                                     |
| 3110007F17Rik        | Gdap1            | Mettl21a         | Mtch2                                      |
| Myl1                 | Rnpc3            | Gpx2             | Zbed3                                      |
| Ap1s2                | Unc13a           | Ntng1            | Bace2                                      |
| Svop                 | Lrrfip1          | Cnp              | Rbmx                                       |
| Tmcc2                | []               | Pde1a            | Armcx2                                     |
| Rab2b                | Sp4              | Slc7a13          | Ndn                                        |
| Myl9                 | Xiap             | Sesn3            | Map4                                       |
| Prpf39               | []               | F10              | Bche                                       |
| Rps4l                | []               | Zfpm2            | Bgn                                        |
| Lepre1               | Fubp1            | Tenm3            | Btbd17                                     |
| Creld2               | Phf20l1          | Rspo1            | Rarres2                                    |
| Hba-a1///Hba-a2      | Gnl2             | Gm13363///Ptp4   | Lox                                        |
| Glipr2               | Gnl2             | Fads2            | Ergic1                                     |
| Il6st                | Mmp16            | Sostdc1          | D530037H12Rik                              |
| Pou6f1               | Zbtb14           | Ccdc34           | Mrpl42                                     |
| Ppfa4                | Ywhaq            | Osr1             | Dnm2                                       |
| Med12l               | Gpr85            | Pax1             | Rnf114                                     |
| Prkce                | B3galt2          | Dcn              | Xpr1                                       |
| Rian                 | Atf7             | Dnajc3           | 1110057K04Rik                              |
| Pgp                  | AU021092         | Nicn1            | Gja1                                       |
| Pitpnc1              | Rac1             | Adssl1           | Ap1s2                                      |
| Pitpnc1              | Cux1             | Hsd17b1          | Rmdn1                                      |
| Rftn2                | Anxa2            | Chst7            | Hsp90b1                                    |
| Slc9a3r2             | Fmod             | Pde9a            | Gm9222                                     |
| Cntn1                | A230046K03Rik    | Jam2             | Ptov1                                      |
| Taf1d                | Pcbp3            | Dscam            | Ybx1                                       |
| Prpf31               | Pitpnm1          | Pde1b            | Gm5481///Gm6109///Gm6570///Gm7429///Rf     |
| Batf3                | Omt2a            | Med9             | Mrpl11                                     |
| Col22a1              | Eif4ebp2         | Ptges            | Hhip                                       |
| Polr3e               | Lrrtm1           | Ptges            | Vim                                        |
| Plscr1               | Foxh1            | Bst1             | Zdhhc14                                    |
| Oasl2                | Igfbp7           | Foxi1            | Coq10a                                     |
| Wbscr25              | Il10ra           | Asb13            | 2610002J02Rik                              |
| Eqtn                 | Zbed3            | Rbp7             | Flot2                                      |
| Pgm1                 | Pofut2           | Clec3b           | Ankef1                                     |
| Ankrd33b             | Bace2            | Gm20737///Gm2    | Hist1h1c                                   |
| Khdrbs3              | Armcx2           | St6galnac5       | Tram1                                      |
| Slamf7               | Ndn              | Gpr12            | Pcsk5                                      |
| Far1                 | []               | Mok              | Ikzf4                                      |
| Cd99                 | Bgn              | Slc2a10          | Ccdc102a                                   |
| Rad23a               | Rarres2          | Mmp7             | Slc22a6                                    |
| Mbd1                 | Lox              | Hist3h2ba///Hist | Cnn3                                       |
| Serpinf1             | Ergic1           | Stc2             | Pfdn5                                      |
| Ndst3                | Bcl2a1a///Bcl2a1 | Mbd4             | Slc13a3                                    |
| BC051212             | D530037H12Rik    | Reg3a            | Pttg1                                      |
| Ergic2               | Zfp787           | Gzmm             | Rbm39                                      |
| Pi16                 | Rnf114           | Kpna1            | Rilpl1                                     |

|               |                 |                |                                        |
|---------------|-----------------|----------------|----------------------------------------|
| Zbed3         | Grin1           | Zfp467         | Zbtb20                                 |
| Gadd45g       |                 | Sep-07 Qpctl   | Inpp5k                                 |
| 1700120B22Rik | Rmdn1           | Gadd45a        | Gm13102///Pramel4                      |
| Ptfr          | Gm9222          | Ttc28          | Nos1                                   |
| Slc37a3       | Rbm5            | Cd93           | Arhgef40                               |
| Ptgfr         | Mrpl11          | Unc5c          | []                                     |
| Gm9706        | Hhip            | Eda            | Tor2a                                  |
| Cdk14         | Ankrd54         | Gdpd3          | Fancf                                  |
| Erc612        | Vim             | Trps1          | Masp1                                  |
| Lig3          | Fdps            | Leprel2        | Masp1                                  |
| Fmo2          | Coq10a          | Tmem100        | Tnni2                                  |
| Ubxn8         | Rhbdd2          | Znrf4          | Gm9840///Rbx1                          |
| Zfp142        | Pcsk5           | Pbx1           | Pgd                                    |
| Prmt3         | Cited4          | Kcnh2          | Lasp1                                  |
| Chpf          | Tpp2            | Fgf18          | Lasp1                                  |
| Lmo2          | lkzf4           | Efnb2          | Fam227b                                |
| Cxxc1         | AA545190        | Myo1c          | Bace2                                  |
| Slc9b1        | Cdk16           | Nkain1         | Gja1                                   |
| 4921524J17Rik | Ccdc102a        | Msx2           | Aplnr                                  |
| Stk31         | 0610037L13Rik   | Krtap1-5       | Mmd2                                   |
| Ccnc          | Cnn3            | Cntn1          | Arf2                                   |
| C330007P06Rik | Pfdn5           | Cyp2g1         | Ptpn1                                  |
| Erc8          | Pfdn5           | Alpk3          | Slc4a7                                 |
| lkbkb         | App             | Cdc42          | Gbp6                                   |
| Gpa33         | App             | Tpm2           | Trim8                                  |
| Cyba          | Fam120b         | H2-DMb1///H2-[ | Edn3                                   |
| Kcnp1         | Rilp1           | Emid1          | Fnbp4                                  |
| Tspan12       | Zbtb20          | Pcdhb20        | Cbfa2t3                                |
| Dpysl3        | Khdrbs1         | Nkap           | Pklr                                   |
| Cpa2          | 5830428H23Rik   | Tcf15          | Osblp6                                 |
| Iffo1         | Chd4            | []             | Irf3                                   |
| Iffo1         | Masp1           | C79490         | C80068                                 |
| Tmem229b      | Masp1           | []             | Thyn1                                  |
| Etnk1         | Clps            | Hdlbp          | Dpysl3                                 |
| Thra          | Gm9840///Rbx1   | Pagr1a         | []                                     |
| Timp2         | Bace2           | Adcy9          | []                                     |
| Pten          | Slc4a7          | Mark1          | Slc20a1                                |
| Dusp9         | Gm12942///Zmy   | Fkbp10         | Calm1///Calm2///Calm3                  |
| Ficd          | Csn1s2a         | C920021L13Rik/ | Eftud2                                 |
| []            | Edn3            | []             | Arg2                                   |
| Apddd1        | Cbfa2t3         | Cct3           | Spata5                                 |
| Rpl35         | []              | Tufm           | Cldn1                                  |
| Pkdcc         | Trim30d         | Ccnb1///Gm559: | Tnfaip2                                |
| Slc52a2       | Osblp6          | Tubb2a-ps2     | Irak1                                  |
| Upk3b         | Adam15          | Nr5a2          | Hdgfrp2                                |
| Amot          | Dpysl3          | 4930453N24Rik  | Tmem206                                |
| Ngfr          | Mtch2           | []             | Fdft1                                  |
| Gm561         | Spata5          | Spsb1          | Gm3362///Gm6177///Gm8112///Gm8137///Gr |
| Rnf157        | lp6k1           | Ssx2ip         | Rasgrp2                                |
| Atcay         | Tnfaip2         | []             | Rasgrp2                                |
| Ntn1          | Heyl            | Tmem191c       | Ampd2                                  |
| Slc25a4       | Map3k12         | []             | Tgm2                                   |
| Ahsg          | Sccpdh          | Tap1           | Gja1                                   |
| Ckb           | Hdgfrp2         | Fgf2           | Gja1                                   |
| Atp1a2        | Hdgfrp2         | Acan           | Pitpnm1                                |
| Nlgn2         | Fdft1           | Ptgfr          | Flywch2                                |
| Ppp2r3d       | Fdft1           | Sntb2          | Gmppb                                  |
| Pitpnc1       | []              | St8sia2        | Ddx17                                  |
| Cml2          | Gm3362///Gm6177 | Slc1a1         | Adcyap1r1                              |
| Rprd2         | Rasgrp2         | Ephb4          | Wipi1                                  |
| Rgs16         | Rasgrp2         | Scube1         | Nynrin                                 |
| Fcgr2b        | Ndn             | Nr0b2          | A930012016Rik                          |
| Masp1         | Ampd2           | Golt1b         | Tsc22d1                                |
| Bai1          | Pim3            | Il4            | Gm4120///Gm4983///Gm9292///LOC1010558z |
| Dnd1          | Cds2            | Hoxc9          | []                                     |
| Cp            | Fkbp1a          | Vpreb1         | []                                     |
| Fam131b       | Fmod            | Atp6v0a2       | Rhox4b                                 |
|               | Sep-04          | Pitpnm1        | []                                     |
| Lgals1        | Pm20d1          | Prkg1          | Enpp3                                  |
| D430019H16Rik | Flywch2         | Efcab2         | Lasp1                                  |
| Adcy2         | lqc3            | Tmem47         | Osblp9                                 |
| Gpr133        | Nfat5           | Timm9          | Mmp2                                   |
| 3110057O12Rik | Prl3d1///Prl3d2 | Galc           | Slc9a3r2                               |
| Syne1         | Ddx17           | Map3k6         | Dmtf1                                  |
| Col1a1        | Recql           | Selp           | Meg3                                   |
| Cnn3          | Zfp3612         | Pitx3          | Slc13a3                                |
| Csn1s2a       | Wipi1           | Csnk1d         | Med1                                   |
| C1qtnf1       | Ahi1            | Tsen15         | Bpifb1                                 |
| Hoxa9         | Cdc73           | Ilk            | Lyz1                                   |
| Tspan17       | []              | Zfhx3          | Slc52a2                                |
| Sec62         | Cops5           | Cacna1f        | Lct                                    |
| Mterfd3       | Tnrc6a          | Fgf14          | A1506816                               |
| Mtcp1         | []              | Lce1h          | []                                     |
| Gm1976        | Gpr137b///Gpr1  | Krtap9-3       | Zfp865                                 |
| Taok3         | Enpp3           | Mcpt8          | Pramel7                                |
| Ndn           | Lasp1           | Spock3         | Fgf11                                  |
| Vasn          | Gm5595          | Il11           | Ttc39b                                 |
| Scarb1        | Ddit4l          | Nqo2           | Slc8a1                                 |
| LnX1          | Flii            | Gimap1         | Abhd11os                               |
| Gprin1        | Mmp2            | 4933421I07Rik  | Syt2                                   |
| Tspan31       | Grsf1           | Cacna2d1       | D9Ertd26e                              |
| Pomc          | Slc9a3r2        | Ctnnb1         | Slc5a1                                 |
| Nanos1        | Slc9a3r2        | Ubqln2         | Cbfa2t3                                |
| Lrrtm1        | Sumo3           | Gtpbp1         | Cbfa2t3                                |
| Rspo2         | Prm1            | B3gnt2         | Eif2s2                                 |
| Slc2a3        | Meg3            | Sdc3           | D18Ertd232e                            |
| Tgm2          | Slc13a3         | Itga9          | C76132                                 |
| Chpt1         | Myadm           | Dctn4          | Dpp4                                   |
| Adrb3         | Nsmf            | Usp9x          | Erlin1                                 |
| Chrna3        | Bpifb1          | Timp2          | C530030P08Rik                          |
| Rbpms         | Herpud2         | Tmem59         | Dpf3                                   |
| Ceacam11      | Lyz1            | Hs6st2         | []                                     |

|                   |                 |               |                        |
|-------------------|-----------------|---------------|------------------------|
| Adamts4           | Twf2            | Idh2          | D9ErtD306e             |
| Matn2             | Lats2           | Hira          | C79242                 |
| Xpa               | A230046K03Rik   | Apc           | []                     |
| Marcks            | Slc52a2         | Enc1          | Kalrn                  |
| Dtna              | Ceacam11        | Maged1        | C78878                 |
| BC089491          | Nsmce4a         | Fmn2          | C79122                 |
| Rnf112            | Gm21596///Gm    | Fmn2          | []                     |
| Tsc22d1           | Lct             | Adcy7         | []                     |
| Itgb5             | Myrf            | Baz1b         | D8ErtD67e              |
| []                | D13ErtD608e///L | Celf2         | C79130                 |
| Acsm2             | Pramel7         | Nrk           | C77691                 |
| Itgb5             | Fgf11           | Nrk           | DXErtD242e             |
| Fgf17             | 2310010J17Rik   | Cxx1c         | C1galt1c1              |
| Ap1s2             | Slc9b2          | Etv5          | []                     |
| Rbm5              | Abhd11os        | Angptl2       | Zc2hc1c                |
| Notch4            | H2afj           | Nolc1         | []                     |
| Slc52a2           | Psmc11          | Srprb         | []                     |
| Vim               | Syt2            | Ighmbp2       | D8ErtD107e             |
| Pex6              | Slco5a1         | Ranbp17       | Eif2d                  |
| Adcy7             | Cbfa2t3         | Gna12         | []                     |
| Lasp1             | Cbfa2t3         | Hoga1         | Gm6211                 |
| Gsn               | D18ErtD232e     | Evl           | D8Wsu26e               |
| Arhgap6           | Dpp4            | Renbp         | C77815                 |
| Shroom1           | C76554          | Gas2          | C77137                 |
| Limd2             | Arhgap29        | Gnaq          | []                     |
| Dner              | D2ErtD127e      | Supt20        | Dcpp3                  |
| Cnn3              | D9ErtD306e      | Tcf7l1        | Arl5a                  |
| Ubxn10            | C79242          | Scn1a         | Fancm                  |
| Zic4              | C77609          | Ptprg         | Maf                    |
| C1ra///C1rb       | C78878          | Xpr1          | Auh                    |
| Mical1            | Dhrs7b          | Cd38          | Egfl8                  |
| Ccdc53            | []              | Gopc          | Mrpl38                 |
| Ewsr1             | AA511254        | Wrn           | Rpp30                  |
| Atxn10            | []              | Brdt          | A1596198               |
| Zfp574            | C79709          | Cux2          | C78441                 |
| Trim30a///Trim30d | []              | Sh2b3         | D1ErtD75e              |
| Osbpl6            | C80060          | Gnas          | D17892                 |
| Tcf15             | []              | Zfp106        | Sash1                  |
| Prokr1            | C79130          | Hcn1          | A430104N18Rik///Mir142 |
| 1700097N02Rik     | C77691          | Mynn          | Ubap2l                 |
| Gsn               | DXErtD242e      | Fgf22         | Taok3                  |
| Nnt               | []              | Pde7b         | Npr3                   |
| Wipi1             | Habp2           | Ccl28         | Tbc1d24                |
| Eya4              | []              | Apaf1         | Tbx3                   |
| Acta2             | Sbf2            | Col4a3        | LOC102640359           |
| Marcks            | Zc2hc1c         | Prlr          | Tfpt                   |
| LOC102640192      | Irs2            | Rsph6a        | LOC102640476///Rnf2    |
| Wwp2              | C78532          | Otud7a        | []                     |
| Wrap53            | E230006M18Rik   | Lnx1          | B4galt3                |
| Ezr               | Nucks1          | Cer1          | Fndc7                  |
| Serpinh1          | Nucks1          | Stat5a        | Bub3                   |
| Armxc2            | D8ErtD107e      | Smad9         | []                     |
| Cog1///LOC102641  | D7ErtD187e      | Pde3a         | Image:619641           |
| Gpm6a             | AA407107        | Il6           | AA408251               |
| Ergic3            | []              | Vax2          | Ctr9                   |
| Rasal3            | Gli2            | 4930591A17Rik | Necap1                 |
| She               | D3Wsu167e       | H2afy3        | Klk1                   |
| Akap17b           | C80425          | Zfp354c       | Serinc1                |
| []                | D8Wsu26e        | 5730493B19Rik | Kitl                   |
| LOC102641785///T  | []              | LOC100043315  | Gusb                   |
| []                | BC053393        | Vmn1r187///Vm | Rit2                   |
| []                | Arl5a           | Ptger3        | Enpp2                  |
| Naalad2           | Neu1            | Jdp2          | Tnfrsf19               |
| AI450241          | Maf             | Ptdss2        | Igf2                   |
| C80360            | Zfyve16         | []            | Vcam1                  |
| Tmem109           | Auh             | Msn           | Siah2                  |
| Iqgap2            | Egfl8           | Epdr1         | Ehd1                   |
| Sema7a            | C76614          | Nf2           | Hn1                    |
| Cdr2l             | Gm11944         | Bace1         | Herpud1                |
| Nxph1             | Zfp398          | Pip5k1b       | Pnliprp2               |
| Usp42             | Ttl             | Mrpl19        | Sfrp2                  |
| AA517562          | []              | St3gal3       | Sav1                   |
| Thyn1             | Mcm9            | Anp32a        | Slc22a17               |
| Aldh7a1           | A1596198        | Slc48a1       | Syngn3                 |
| Adprh             | 1110008P14Rik   | Stag1         | Lox                    |
| Sfrp1             | []              | Capn6         | Mbtps1                 |
| Osbpl1a           | D1ErtD75e       | Pcyt1a        | Clmp                   |
| Itpr1             | Cdca3           | Ncam1         | Clmp                   |
| Fbn1              | 2610001J05Rik   | Ncam1         | Slc29a2                |
| Pkd1              | Ankhd1          | Gfra1         | Fstl1                  |
| Prl7d1            | Vps13c          | Socs1         | Uchl1                  |
| Guca2b            | C76336          | Rilpl1        | Klhl13                 |
| St3gal5           | Fam46c          | Rcan3         | Tspan4                 |
| Zfp105            | []              | Spock2        | Cela2a                 |
| Cmtm7             | Tbc1d24         | Cbl           | Crmp1                  |
| 1700094J05Rik     | Tbx3            | Sppl2a        | Mmp9                   |
| Itga9             | LOC102640359    | Crhr2         | Ebf1                   |
| Timp2             | Gnao1           | Ptpn12        | Slc1a1                 |
| Nrg3              | Inca1           | Sox3          | Ick                    |
| Akt3              | Rnf2            | Itga2         | Pcsk2                  |
| Fut8              | Nmrk1           | Dpysl2        | Cmtm3                  |
| Chst3             | Ing4            | Foxn1         | Akr1b3///Gm6644        |
| B4galt6           | Huwe1           | Chst11        | Bgn                    |
| Anxa3             | Mipol1          | Rab17         | Crabp1                 |
| Sh3kbp1           | Sema6d          | H1f0          | Actn2                  |
| Esam              | Stk11           | Tlx1          | Cpq                    |
| Armxc3            | AA408251        | Pvt1          | Cfl1                   |
| Dnm1              | C76533          | Klra15        | Rpn1                   |
| Hspa12b           | []              | Defb2         | Stx1a                  |
| Ccdc117           | C78228          | Tex13         | Fscn1                  |
| Psip1             | Necap1          | Vmn1r51       | Lgals3bp               |
| Arhgef10l         | Ctps2           | Cd19          | Pofut2                 |

|               |               |                 |                               |
|---------------|---------------|-----------------|-------------------------------|
| Gabrg1        | Bpgm          | Bfsp1           | Sparc                         |
| Fbln7         | Gusb          | Akp3            | 4632428N05Rik                 |
| Zdhhc1        | Enpp2         | Cyp11b2         | Sema3b                        |
| Obsl1         | Igf2          | Olfr68//Olfr69  | Aspn                          |
| Tmem160       | Lcp1          | Olfr1508        | Frzb                          |
| Pde4dip       | Vcam1         | Vmn1r46         | Pcolce                        |
| Arrb1         | Fkbp1a        | Ifnab           | Irf1                          |
| 2700089E24Rik | Pnliprp2      | Col5a2          | Chkb                          |
| Ednra         | Sfrp2         | Qtrt1           | Ripk3                         |
| Trim46        | Syng3         | Rhoa            | Irf8                          |
| Ints8         | Cox8a         | Aebp1           | Hsd3b1                        |
|               | Sep-11 Lox    | Gm3837//Pdcd!   | Acvr1                         |
| Fastk         | Ldhb          | Vim             | Kcnab1                        |
| Atox1         | Gm2a          | Gng10           | Nid1                          |
| Traf4         | Clmp          | Ctsk            | Olfml3                        |
| S1pr3         | Clmp          | Adamts5         | Chst12                        |
| Cckbr         | Fstl1         | Rgs7            | Slc39a8                       |
| U90926        | Klhl13        | Nfic            | Lrrfip1                       |
| Klhdc2        | Tspan4        | Dbh             | Tead2                         |
| Col9a3        | Cela2a        | Atrip//Trex1    | Sars2                         |
| Mc5r          | Reg3b         | Col9a2          | Thbd                          |
| Erc2          | Mmp9          | Itgb2           | Prl8a9                        |
| Slc35c2       | Ebf1          | Rag1            | Sirpa                         |
| Limd2         | Tuba3a//Tuba3 | Zfp143          | Acy3                          |
| A630038E17Rik | Rab6a         | Tagln3          | Klc1                          |
|               | Cmtm3         | Etv1//Gm5454    | Sdc2                          |
|               | Smoc1         | Prss3           | Lbp                           |
|               | Bgn           | Dusp2           | Prlr                          |
|               | Crabp1        | Slc7a2          | Fam13c                        |
|               | Adprh         | Jarid2          | Bid                           |
|               | Cpq           | Sh2b2           | Upp1                          |
|               | Tmem30a       | Fam126a         | 1700071K01Rik//Phb            |
|               | Vapa          | Hs2st1          | Prl4a1                        |
|               | Dnajc7        | Hs2st1          | Gtf2h4                        |
|               | Dctn6         | Tnfrsf21        | Crtap                         |
|               | Tm9sf3        | Sec16b          | Wisp1                         |
|               | Slpi          | Pno1            | Bex1                          |
|               | Wap           | Syncrip         | Pygm                          |
|               | Sparc         | Keap1           | Rhoc                          |
|               | Eid1          | Pafah1b2        | Lsm4                          |
|               | 4632428N05Rik | Cdh11           | Hipk2                         |
|               | Hps1          | Bmp6            | Psmb10                        |
|               | Wfs1          | 3632451O06Rik   | Fam114a1                      |
|               | Aspn          | Fut9            | Enpep                         |
|               | Tmed4         | Mos             | Pole                          |
|               | Frzb          | Fabp7           | Lrp1                          |
|               | Sardh         | Reck            | Mvd                           |
|               | Asb6          | Rhpn1           | Speg                          |
|               | Pcolce        | Prss28          | Irak1                         |
|               | Serpini1      | Kat2b           | Pvrl3                         |
|               | Irf8          | Ptch1           | Rnf25                         |
|               | Top2b         | Nrep            | Camk2b                        |
|               | Ehbp11        | Serpinh1        | Podxl                         |
|               | Nid1          | Ncbp2           | Kcnk1                         |
|               | Olfml3        | Col1a2          | G0s2                          |
|               | Chst12        | Fancc           | Cxcr4                         |
|               | Lrrfip1       | Dclk1           | BC094435//Ccrn4//Cog6//Sgip1  |
|               | Serpina6      | Calm1//Calm2/,  | Cish                          |
|               | Efh1          | Hgsnat          | Tle6                          |
|               | Ptprcap       | Cfh             | Sep-04                        |
|               | Tead2         | Cd36            | Cpa3                          |
|               | Thbd          | Cd36            | Cp                            |
|               | Rsrp1         | Ap2m1           | Cp                            |
|               | Acy3          | Cox16           | Lor                           |
|               | Sdc2          | Brd3            | Fbxo32                        |
|               | Rassf3        | Tmem167         | Plek                          |
|               | Lbp           | Eif4e           | Rbp1                          |
|               | Prlr          | Ppib            | Col15a1                       |
|               | Prl4a1        | B4galt6         | S100a9                        |
|               | Zfp346        | Src             | Fyn                           |
|               | Col6a1        | Aptx            | Gjb1                          |
|               | Crtap         | Tgfb2           | Mog                           |
|               | Wisp1         | Tgfb2           | Slc35b1                       |
|               | Mmp17         | Hdgfrp3         | Gm16340//Ifi203//LOC100862473 |
|               | Msx1          | Prkca           | Gadd45gip1                    |
|               | Pygm          | LOC102642893//  | Txndc11                       |
|               | Rhoc          | Sqstm1          | Runx1t1                       |
|               | Lpar1         | Tceal3//Tceal5/ | Aldh1a3                       |
|               | Nampt         | Ptplad2         | Sema6b                        |
|               | Dvl2          | Pccb            | Cyp2f2                        |
|               | Fcgr3         | Gadd45b         | Elk3                          |
|               | Hipk2         | Cacng4          | Eps8l3                        |
|               | Spata5        | Gpc3            | Rtn4ip1                       |
|               | Slc14a1       | Aco2            | Cyp11a1                       |
|               | Fam114a1      | Slc29a3         | Usf1                          |
|               | Enpep         | Ergic3          | Gne                           |
|               | Lrp1          | Ctsf            | Wnt5a                         |
|               | Speg          | Lrp6            | Angpt2                        |
|               | Irak1         | Arl1            | E2f6                          |
|               | Pvrl3         | Ftsj3           | Cdo1                          |
|               | Rnf25         | Baiap2          | Serinc3                       |
|               | Fam118a       | Ptpn9           | Rassf1                        |
|               | Prkci         | Nop9            | Icam2                         |
|               | G0s2          | Bcap31          | Ltbp1                         |
|               | Cxcr4         | Scyl1           | Evc                           |
|               | Hba-x         | 1700018B24Rik   | Hp                            |
|               | Tle6          | Stxbp4          | Dock7                         |
|               | Cp            | Sgta            | Ncor2                         |
|               | Snai1         | Gdi1            | Akr1b8                        |
|               | Plek          | Aars            | Ctnna2                        |
|               | Plek          | Esyt1           | Cpxm1                         |
|               | Col15a1       | Vash2           | Sep-15                        |



|               |                 |                     |
|---------------|-----------------|---------------------|
| Fyn           | Tut1            | Ppap2b              |
| Mog           | Fbln1           | C1qtnf1             |
| Runx1t1       | Polr1d          | Csf1                |
| Cd200         | Vopp1           | Mafg                |
| Aldh1a3       | Eif2b2          | Cd302               |
| Sema6b        | Cyhr1           | Twist2              |
| Elk3          | Celf2           | F13a1               |
| Wnt5a         | Hsbp1           | Gng11               |
| Pdk2          | Ccdc101         | Nrp1                |
| Vil1          | Arhgdia         | Slc50a1             |
| Pfpl          | Spcs3           | Car4                |
| Cdo1          | Mavs            | Il1r1               |
| Rpp25         | Nt5c3b          | Cadps               |
| Serinc3       | Sf3b5           | S100g               |
| Rgn           | Aen             | Nfat5               |
| Mug-ps1///Mug | Zswim1          | Gria1               |
| Icam2         | Crabp2          | Tfap2c              |
| Ltbp1         | Scara5          | Ghrl                |
| Evc           | Prrc1           | Acadl               |
| Dlx2          | Immp1l          | Myo1b               |
| Hp            | Scamp5          | Myo1b               |
| Dock7         | Rerg            | Ina                 |
| Cpxm1         | Jkamp           | Rom1                |
| Fam3c         | Lamb1           | Slc16a3             |
| Mrps34///Nme3 | Ppp5c           | Gla                 |
| Ppap2b        | Zfp422          | Fndc4               |
| C1qtnf1       | Fabp4           | Retnla              |
| Mafg          | Tram1l1         | Nes                 |
| Cd302         | Dusp18          | Rnf128              |
| Twist2        | Erc1            | Crem                |
| Kcnn2         | Arpp21          | Hsd11b1             |
| F13a1         | Zscan12         | Naga                |
| B4galt2       | Arap3           | Rab4a               |
| Gng11         | Fus             | Cog1///LOC102641618 |
| Nrp1          | Aif1l           | Gli1                |
| Cxxc5         | Dclk1           | Slc2a2              |
| Plscr2        | Map1lc3a        | Apccd1              |
| Tfap2c        | Nabp2           | St3gal6             |
| Ghrl          | Rrp9            | Fbp2                |
| Acadl         | Cby1            | Gjc1                |
| Myo1b         | Cmb1            | Poli                |
| Myo1b         | Zfp521          | Ebf2                |
| Gla           | Spon1           | Gpx3                |
| Fndc4         | Tmem119         | Socs2               |
| Nes           | Mtap            | Rhob                |
| Hexa          | Mtap            | Rgl1                |
| Rhou          | Ino80e          | Zfp90               |
| Rhou          | Lpcat1          | Cd1d1               |
| Syn2          | Cops6           | Cd1d1               |
| Klkb1         | Cops6           | Spic                |
| 4930544G11Rik | Ccdc107         | Sox18               |
| Crem          | Zfyve19         | Nudcd2              |
| Hsd11b1       | Aamdc           | Chst1               |
| Ctcf          | Kdm8            | Mmp12               |
| Hac1          | Cuta            | Col11a1             |
| Tlr1          | Pcsk5           | Nr2c1               |
| Pcbp4         | Nop16           | Akap2               |
| Kel           | Brca1           | Piwil2              |
| Gli1          | Spsb4           | Ccna1               |
| Apccd1        | Egfl7           | Midn                |
| Myl7          | Egfl7           | Cd5l                |
| Tex40         | Slit2           | St3gal5             |
| Mfap5         | Chodl           | Slco1a5             |
| Gjc1          | Antxr1          | Slc22a21            |
| Ebf2          | Pcdh20          | Cox8b               |
| Ebf2          | Ifnar2          | Rrbp1               |
| Sh2d2a        | Prr5            | Ebi3                |
| Gpx3          | Mtg2            | Trpm5               |
| Socs2         | Ears2           | Hic1                |
| Stk3          | Cryz1l          | Psg16               |
| Pcm1          | Plxnd1          | Rnf138rt1           |
| Zfp90         | Zfp940          | Cdh2                |
| Selplg        | Syn1            | Clcn2               |
| Cd1d1         | Csnk1a1         | Ndp                 |
| Cd1d1         | Cadps2          | Spp1                |
| Opn1sw        | Mef2c           | Syt11               |
| Sox18         | Mef2c           | Gfpt1               |
| Chst1         | Serpina1b       | F5                  |
| Mmp12         | Steap1          | Gpx2                |
| Col11a1       | Mpi             | Esm1                |
| Akap2         | Ggact           | Ntng1               |
| Gpr65         | Gm16340///Ifi2C | Casp12              |
| Wfdc12        | Nr2c2           | Pde1a               |
| St3gal5       | Fam92a          | Sesn3               |
| Igf2bp1       | Zbtb20          | Zfpm2               |
| Slc22a21      | Ppp6r2          | Tenm3               |
| Trpm5         | Tulp1           | Rspo1               |
| Mapk8ip2      | Mmgt2           | Gm13363///Ptp4a1    |
| Sh3gl2        | Cplx4           | Fads2               |
| Bhlha15       | Snx6            | 1600015110Rik       |
| Psg16         | Rtbdn           | Ly75                |
| Hrg           | Acvrl1          | Fhl5                |
| Cdh2          | Psg-ps1         | Timp3               |
| Ndp           | Slc1a2          | Tdo2                |
| Smc1b         | Airn            | Mpp6                |
| Spp1          | Cebpg           | Osr1                |
| Pbx2          | Rab4b           | Pdgfc               |
| Ufm1          | Slc24a1         | M1ap                |
| Syt11         | Ap4s1           | Pax1                |
| Mecp2         | Slc12a5         | Csf2rb2             |
| Gfpt1         | Drap1           | Aurkc               |
| F5            | Arxes1///Arxes2 | Dcn                 |

|                  |                  |                                       |
|------------------|------------------|---------------------------------------|
| Cadm3            | Ednra            | Tmprss2                               |
| 1700029P11Rik    | Fgf12            | Sox4                                  |
| Ccl19///Gm1240   | Gpx4             | Pipox                                 |
| Gpx2             | Cmtm7            | Ces2a                                 |
| Tescl            | Scgb2b20///Scgt  | Kdr                                   |
| Ntng1            | Oprm1            | Pacsin1                               |
| Skp2             | Mafb             | Slc6a12                               |
| Pde1a            | Mtmr6            | Adssl1                                |
| Sesn3            | Slu7             | Tal1                                  |
| Hsf2             | Pik3r1           | Gpatch4                               |
| Dbndd1           | Znhit1           | Zfp37                                 |
| Tenm3            | Atg12            | Aoc3                                  |
| Cyp4f15          | Flt1             | Chst7                                 |
| Tubg2            | Lamc3            | Pde9a                                 |
| Rspo1            | Hmgcr            | Jam2                                  |
| Serpina1b///Serf | Pcdha1///Pcdha   | Pde1b                                 |
| Gm13363///Ptp4   | Ddx60            | Trpc6                                 |
| Ly75             | Ryk              | Klf7                                  |
| Pdzd3            | Tfpi             | Cst10                                 |
| Fhl5             | Tfpi             | Ptges                                 |
| Anapc16          | Pja1             | Ptges                                 |
| 2210409E12Rik    | Klhl24           | Foxi1                                 |
| Osr1             | Tom1l2           | Rbp7                                  |
| Pdgfc            | Ccdc25           | Klk1b8                                |
| Zrsr1            | Gcc2             | Kcnq1                                 |
| Csf2rb2          | Vegfb            | Clec3b                                |
| Tbx21            | Rwdd3            | Gm20737///Gm20772///Gm20773///Gm20777 |
| Mmp8             | Zfp451           | St6galnac5                            |
| Sox4             | Diras1           | Pkd2l2                                |
| Pipox            | Sp100            | Dlx1                                  |
| Ces2a            | Btn1a1           | Kcnmb4                                |
| Pacsin1          | Copz1            | Cd40                                  |
| Adssl1           | Nox4             | Slc2a10                               |
| 4931417E11Rik    | Sptbn1           | Mmp7                                  |
| Tal1             | Osbpl6           | Stc2                                  |
| Gpatch4          | Cklf             | Mbd4                                  |
| Zfp37            | Ncor2            | Il12b                                 |
| Ankrd61          | Notum            | Dazl                                  |
| Il1b             | Arhgap6          | Kpna1                                 |
| C1qc             | Lsm2             | Il27ra                                |
| Chst7            | Speg             | Ssbp4                                 |
| Pde9a            | Kif13a           | Gadd45a                               |
| Ift81            | Gtf2ird1         | Ttc28                                 |
| Jam2             | Fgfr1            | Unc5c                                 |
| Sult1c2          | Hyou1            | Fmo3                                  |
| Zfp53            | Trim15           | Gdpd3                                 |
| Fzd4             | Rftn2            | Pcdhb7                                |
| Kcne2            | Mrgpra4          | Figf                                  |
| Fkbp1b           | Vrk2             | Trps1                                 |
| Trpc6            | Srpx             | Leprel2                               |
| Mme1l            | Ppm1a            | Msh5                                  |
| Klf7             | Igkv5-39         | 1700010114Rik                         |
| Decr1            | abParts///Igkv14 | Zscan5b                               |
| Gp2              | Prok2            | Zfr                                   |
| Foxi1            | Mrap             | Fetub                                 |
| Rbp7             | Glcci1           | Krtap1-5                              |
| Reln             | Uba5             | 1700001G17Rik                         |
| Clec3b           | Cmtm1///Cmtm     | Cntn1                                 |
| Gm20737///Gm     | Loxl1            | Thpo                                  |
| St6galnac5       | Arrb2            | Trhr                                  |
| Pkd2l2           | Mapre2           | Tpm2                                  |
| Kcnmb4           | Mapre2           | Pcdhb20                               |
| Slc2a10          | Epha7            | Il1rap                                |
| Mmp7             | Taf11            | Nkap                                  |
| Gm10094///Sap    | Gm8539///Zbtb8   | Mras                                  |
| Stc2             | Vamp7            | Casp4                                 |
| Tssk2            | Igf1             | LOC102638039                          |
| Il12b            | Ldb1             | []                                    |
| Gzmm             | Col4a1           | C79490                                |
| Kpna1            | Zfp281           | Acp1                                  |
| Il27ra           | Ppp1cc           | Pagr1a                                |
| Grk5             | Rnf11            | []                                    |
| Gadd45a          | Vstm2a           | Fkbp10                                |
| Ttc28            | Dcun1d1          | C920021L13Rik///C920021L13Rik         |
| Cd93             | Zbed3            | Tlr7                                  |
| Unc5c            | Copb2            | Cct3                                  |
| Pcdhb7           | Arl16            | LOC101055763                          |
| Trps1            | Igfbp5           | Nudcd1///Nudcd1                       |
| Leprel2          | Zfp160           | []                                    |
| Chrng            | H6pd             | C77545                                |
| Sycp3            | Ets1             | AA536748                              |
| Kcnn1            | Grwd1            | Mphosph9                              |
| Gcnt1            | Sreb2            | []                                    |
| 1700010114Rik    | Meg3             | Tufm                                  |
| Kcnh2            | Ipo8             | Tufm                                  |
| Fgf18            | Prcp             | Tmem38b                               |
| Tle3             | Prcp             | C80678                                |
| Nkapl            | Swsap1           | Tubb2a-ps2                            |
| Cntn1            | Pde2a            | Oxsm                                  |
| Tpsg1            | Prdm4            | Arhgef25                              |
| Tktl1            | Ccdc117          | Arhgef25                              |
| Klrb1b///Klrb1c  | Ccser2           | Etf1                                  |
| Trhr             | []               | Nr5a2                                 |
| Gstp1            | Dnajc10          | []                                    |
| Emid1            | Col6a2           | Fgf4                                  |
| Pcdhb20          | Nbea             | AA522020                              |
| Nkap             | Slc35f4          | AA517023                              |
| Mras             | Tenc1            | Spsb1                                 |
| LOC102638039     | Cubn             | []                                    |
| []               | Zfand3           | D7Ert183e                             |
| Gm3716           | Farp1            | []                                    |
| []               | Rassf8           | []                                    |

|                |                 |               |
|----------------|-----------------|---------------|
| Hdlbp          | Ptprz1          | Tmem191c      |
| Pagr1a         | Msi1            | Gadd45b       |
| Sel1l2         | Slit3           | AA414993      |
| Mark1          | Rmdn1           | []            |
| Fkbp10         | 2810002D19Rik   | Prph          |
| Prpf19         | Spryd3          | []            |
| Trav12n-1      | Pvt1            | []            |
| []             | Iqsec1          | Frat1         |
| Gpr137b        | Mxra8           | Ssbp2         |
| []             | Zfp395          | Abcb11        |
| Tmem38b        | Itsn1           | Dmc1          |
| Arhgef25       | Adamts7         | Dach2         |
| Arhgef25       | Zfp518b         | Fgf2          |
| Map3k7         | Echs1           | Ptgfr         |
| C80171         | B3gnt1          | Prl3c1        |
| Nr5a2          | 2810459M11Rik   | Tctex1d1      |
| Atp6v1e1       | Rd3             | Sntb2         |
| []             | Rai2            | Gna14         |
| 4930453N24Rik  | Rabl6           | Scube1        |
| []             | Malat1          | Golt1b        |
| []             | Epha7           | Higd1b        |
| []             | Creb3l2         | Il4           |
| Fzd3           | Dnm3os///Mir21  | Sema3a        |
| AA522020       | Wipi1           | Hoxc9         |
| AA517023       | Cars            | Tbx18         |
| Spsb1          | Rgs6            | Bmp8a         |
| AA511261       | Hoxa11os        | Prkg1         |
| D11Ert326e     | Fes             | Casr          |
| AA589418       | Hoxc8           | Tmem47        |
| Ssx2ip         | Actn1           | MIph          |
| C76628         | Lpar4           | Grin3b        |
| AA517650       | Abcf1           | Map3k6        |
| AA517650       | Tfpi            | Selp          |
| []             | Ccdc167         | 4933425L06Rik |
| Zfp30          | Bean1           | Prg3          |
| Abcb4          | Prkab1          | Tsen15        |
| Dmc1           | Erbp3           | 8430419L09Rik |
| Prg4           | Gm11767         | Ilk           |
| Fgf2           | Dlx6            | Sec61a2       |
| Ptgfr          | Fanca           | Prss30        |
| Tctex1d1       | Xylt2           | Lce1h         |
| Spr2f          | P2rx4           | Capn12        |
| Spesp1         | Ceacam1         | Cd209f        |
| Crisp3         | Tcf3            | Spock3        |
| Scube1         | []              | Il11          |
| Nr0b2          | Galm            | Samt3         |
| Higd1b         | Zfp688          | Gimap1        |
| Il4            | Ptk7            | Vamp5         |
| Sema3a         | Gm9780///Plac9  | Cacna2d1      |
| Hoxc9          | Adamts4         | Cng1          |
| Tbx18          | AI413582        | Ubqln2        |
| Bmp8a          | Taf6l           | Gtpbp1        |
| Ly96           | 1190005I06Rik   | Gtpbp1        |
| Prkg1          | Ltn1            | B3gnt2        |
| 1700008F21Rik/ | Ssbp1           | Sdc3          |
| Casr           | Cdk5rap2        | Itga9         |
| Tmem47         | Lrrtm1          | Tub           |
| Epas1          | Senp6           | Arx           |
| Dcbld2         | Bag5            | Tmem59        |
| MIph           | Enpp4           | Hs6st2        |
| Map3k6         | Trim62          | Hira          |
| Selp           | Tmem158         | Asph          |
| 2210418O10Rik  | Zdhhc2          | Maged1        |
| Lag3           | Zdhhc2          | Fmn2          |
| Cd209g         | Ap1s2           | Fmn2          |
| Cd70           | Ttc27           | Adcy7         |
| Zfhx3          | Tmcc2           | Celf2         |
| Lce1h          | Rab2b           | Nrk           |
| Nptx2          | Myf9            | Cxx1c         |
| Capn12         | Luc7l           | Etv5          |
| Spock3         | Rps4l           | Srprb         |
| Gabrd          | Ebf3            | Acyp1         |
| Il11           | Lepre1          | Gna12         |
| Samt3          | Crel2           | Hoga1         |
| 2310034C09Rik  | Hba-a1///Hba-a2 | Adam10        |
| Prss29         | Rrbp1           | Renbp         |
| Vamp5          | Txn2            | Gas2          |
| Cacna2d1       | Prmt1           | Scn1a         |
| Ctnnb1         | Pigk            | Scn1a         |
| Cx3cr1         | Lphn1           | Ryr2          |
| Cx3cr1         | Cnep1r1         | Abcg3         |
| Ubqln2         | Cad             | Pla2r1        |
| B3gnt2         | Lpin2           | Mcoln3        |
| Itga9          | Il6st           | Hmmr          |
| Slco2a1        | Med12l          | Ikbkg         |
| Usp9x          | Prkce           | Ids           |
| Timp2          | Gtl3            | Ptprt         |
| Hs6st2         | Pgp             | Ern1          |
| Atrx           | Tpi1            | Brdt          |
| Kif2a          | Pitpnc1         | Sh2b3         |
| Vsnl1          | Cntn1           | Tef           |
| Enc1           | Sec31a          | Gnas          |
| Maged1         | Msl2            | Zfp106        |
| Fmn2           | Rgs8            | Sox13         |
| Adcy7          | Snapp3          | Hcn1          |
| Ubr1           | Obox1///Obox2   | Gys1          |
| Celf2          | Slc25a39        | Proz          |
| Kif3b          | Wdsub1          | Grin1         |
| Kif3b          | Gkn2            | Smyd1         |
| 4933411K20Rik  | Ptgr2           | Dlc1          |
| Nrk            | Plscr1          | Elmo1         |
| Cxx1c          | Smpd4           | Hoxd3///Hoxd4 |

|                  |                  |               |
|------------------|------------------|---------------|
| Etv5             | Rai1             | Bmp15         |
| Angptl2          | 2700089E24Rik    | Pcdhb16       |
| Nolc1            | Dhx30            | Spdef         |
| Hoga1            | Rpusd1           | 4933417A18Rik |
| Tcerg1           | Ppp2r2a          | Klk1b4        |
| Magi3            | Pgm1             | Apaf1         |
| Renbp            | Anapc5           | Prlr          |
| Abcc2            | Khdrbs3          | Xiap          |
| Gas2             | Tex9             | Dnase2b       |
| Gnaq             | Abhd12           | Fut2          |
| Tcf7l1           | Ttc39b           | Otud7a        |
| Tnnt3            | Chst4            | Ln timer      |
| Scn1a            | Rab28            | Stat5a        |
| Scn1a            | Timm10b          | Pcdhb5        |
| Ryr2             | Dynlt1a///Dynlt1 | Chka          |
| Atp2a3           | Far1             | Scn10a        |
| Gata5            | Wdr33            | Tlr8          |
| Loxl4            | Tmem216          | Pcdhb11       |
| Fzd3             | Pter             | Il1rl2        |
| Pla2r1           | Hbs1l            | Rrh           |
| Ankef1           | Thoc7            | Atp7b         |
| Gopc             | Rnf41            | Pde3a         |
| Itga4            | Derl3            | Npr3          |
| Rem1             | Nphp1            | Hormad1       |
| lkbkg            | Serpinf1         | Il6           |
| Dpf3             | Pitpnc1          | Vax2          |
| Ascl1            | Fam110a          | Klrc2         |
| Slc4a4           | Ndst3            | Astn2         |
| Gzme             | BC051212         | Grid2ip       |
| Ngfr             | Ergic2           | Cdh20         |
| Cux2             | Nsa2             | Dqx1          |
| Clcnka           | Pi16             | Pcdhb13       |
| Gnas             | Zbed3            | LOC100043315  |
| Gys1             | Hnrnpab          | Arr3          |
| Csf2rb///Csf2rb2 | Gadd45g          | Gata2         |
| Proz             | Zbtb46           | Il21          |
| Grin1            | Slc25a26         | Setd1a        |
| Smyd1            | Ptrf             | Clcnkb        |
| Hoxd3///Hoxd4    | Ptger3           | Ptger3        |
| Pde7b            | Ssb              | Syt10         |
| Rcvrn            | Sdccag8          | Jdp2          |
| Ccl28            | Cdk14            | Mtnr1a        |
| Ccl28            | Med1             | Ptdss2        |
| Spdef            | Lig3             | Arl4d         |
| 4933417A18Rik    | Stxbp4           | Prop1         |
| Klk1b4           | Ubxn8            | Figla         |
| Insr             | Exosc10          | Kcnp4         |
| Prlr             | Chpf             | Tshb          |
| Rsph6a           | Rgs3             | Tapbp         |
| Otud7a           | Rnf138           | Msn           |
| Ln timer         | Ddhd1            | Bcl6          |
| Onecut1          | Slx1b            | Bace1         |
| Arhgap31         | Lmo2             | Abca1         |
| Cer1             | Pdss1            | Slc22a5       |
| Pcdhb5           | Cxxc1            | St3gal3       |
| Chka             | Kif2a            | Serhl         |
| Scn10a           | Jmjd6            | Kdelc1        |
| Vmn2r-ps54       | Mterfd1          | Chrna6        |
| Tacr3            | Pcgf6            | Ncam1         |
| Tbata            | 4921524J17Rik    | Nr1h3         |
| Atp7b            | Ccnc             | Socs1         |
| Pde3a            | Pla2r1           | Stc1          |
| Uba1y            | Clpb             | Rilpl1        |
| Mageb3           | Eri2             | Rcan3         |
| Chrna7           | Cyba             | Spock2        |
| Gabbr1           | []               | Pde6g         |
| 4930470P17Rik    | Tspan12          | Il21r         |
| Vax2             | Ttr              | Cbl           |
| 4930591A17Rik    | Dpysl3           | Ncoa2         |
| H2afy3           | C86187           | Sppl2a        |
| Dqx1             | Iffo1            | Crhr2         |
| 4931432E15Rik    | Gtf2a1           | Smad3         |
| Setd1a           | Tmem229b         | Cnr2          |
| Nek8             | Etnk1            | Grk6          |
| Pcdhb8           | Rpl41            | Vsx1          |
| Ptger3           | Chchd7           | Sall1         |
| Jdp2             | Zranb2           | Cngb3         |
| Mtnr1a           | Spata13          | Musk          |
| Trhr2            | Timp2            | Ntn4          |
| Figla            | Hdc              | Kcnj11        |
| Pspn             | Dusp9            | Tal2          |
| Epdr1            | Aamp             | Hnf4g         |
| Abca1            | Tsc22d1          | Cldn9         |
| Golph3           | Rbbp4            | Tlx1          |
| Slc22a5          | []               | Plagl1        |
| Map1b            | Serinc1          | Krtap12-1     |
| Anp32a           | Pkdcc            | Mid2          |
| Pde6a            | Rbbp4            | Ammecr1       |
| Yipf4            | Amot             | Elk4          |
| Chrna6           | Cds2             | Mgst3         |
| Chrna6           | Lpp              | Ifna1         |
| Capn6            | Rarb             | Col2a1        |
| Mrc1             | Pbx4             | Rbm14         |
| Rbpjl            | Gm561            | Bdkrb1        |
| Ncam1            | Psma5            | Olfr749       |
| Gfra1            | Ublcp1           | Vmn1r53       |
| Nr1h3            | Ntn1             | Olfr1508      |
| Hnf4a            | Ambra1           | Hist1h1t      |
| Stc1             | H2-Ke6           | Ifnab         |
| Rilpl1           | Nhsl2            | Ifna5         |
| Rcan3            | Srr              | Pdia4         |
| Pde6g            | Slc25a4          | Col5a2        |

|                   |                  |                                       |
|-------------------|------------------|---------------------------------------|
| Akr1c12///Akr1c   | Angptl2          | Slc2a8                                |
| Cbl               | Vtn              | Qtrt1                                 |
| Ncoa2             | Ckb              | Rhoa                                  |
| Serpib9c          | Atp1a2           | Alpl2                                 |
| Pitx2             | Nlgn2            | Aebp1                                 |
| Sox3              | Syt11            | Vim                                   |
| Sall1             | Ppp2r3d          | Cyp51                                 |
| Kcna7             | Maneal           | Gng10                                 |
| Kiss1r            | Pitpnc1          | Ctsk                                  |
| Ceacam1           | Mrps11           | Spz1                                  |
| Mthfr             | Rgs16            | Pten                                  |
| Chst11            | Coro1a           | Adamts5                               |
| Cacna1a           | Gm13889          | Rgs7                                  |
| Zscan2            | Leprel4          | Thbs2                                 |
| Rab17             | Cp               | Dbh                                   |
| Tal2              |                  | Sep-04 Tagln3                         |
| Tlx1              | Lgals1           | Etv1///Gm5454                         |
| Plagl1            | D430019H16Rik    | Dusp2                                 |
| Cma2///Mcpt9      | Adcy2            | Hfe                                   |
| Krtap5-1          | Ap2a2            | Slc7a2                                |
| Magea1///Mage     | Syne1            | Kcnj9                                 |
| Usp17lc///Usp17   | Col1a1           | Adamts1                               |
| Htr1f             | Mfsd4            | Sh2b2                                 |
| Klra15            | Mrs2             | Fam126a                               |
| Hoxd12            | Ddx49            | Tnfrsf21                              |
| Tex13             | Cnn3             | Sec16b                                |
| Mgst3             | Eif4ebp2         | Polr3k                                |
| Ifna1             | C1qtnf1          | Zppb                                  |
| Col2a1            | Hoxa9            | Cyct                                  |
| Bfsp1             | Tspan17          | Cdh11                                 |
| Cyp11b2           | Mterfd3          | Rims2                                 |
| Chrm4             | Taok3            | Zfp191                                |
| Galr3///Gcat      | Ndn              | 3632451O06Rik                         |
| Fpr3              | Olfm1            | Fut9                                  |
| Bdkrb1            | Arhgef40         | Kcnd2                                 |
| Olfr67            | Vasn             | Agpat6                                |
| Olfr749           | Scarb1           | Reck                                  |
| Ifna15///Ifna6/// | Lnx1             | Trip4                                 |
| Magea4            | Gm6277           | 4930550L24Rik                         |
| Vmn1r10///Vmn     | Pomc             | Adcyap1r1                             |
| Vmn1r53           | Lrrtm1           | Adam21                                |
| Vmn1r14           | Rspo2            | Tlx3                                  |
| Olfr140           | Kcnk1            | Fpr1                                  |
| Pnmt              | Tgm2             | Bcl2a1a///Bcl2a1b///Bcl2a1c///Bcl2a1d |
| Orm3              | Chpt1            | Lyz1                                  |
| Ifnab             | 2610507B11Rik    | Ptch1                                 |
| Col5a2            | Adrb3            | Saa3                                  |
| Aebp1             | Gpaa1            | Serpinh1                              |
| Vim               | Adamts4          | F2r                                   |
| Gng10             | Zmiz1            | Col1a2                                |
| Myo10             | Gjc2             | Fancc                                 |
| Ctsk              | Vgll4            | Rad54l                                |
| Spz1              | Ddx18            | Dclk1                                 |
| Pten              | Xpa              | Cfh                                   |
| Adamts5           | Marcks           | Cd36                                  |
| Dbh               | Fmod             | Cd36                                  |
| Col9a2            | Elmo2            | Tmem167                               |
| Tagln3            | Rnf112           | Cap2                                  |
| Etv1///Gm5454     | Zic5             | B4galt6                               |
| Igf2bp3           | AK213652         | Src                                   |
| Rgs17             | Calr             | Tgfb2                                 |
| Ahr               | Mela             | Tgfb2                                 |
| Dusp2             | Rbm5             | Dnase1l2                              |
| Selenbp1          | Slc52a2          | Entpd1                                |
| Hfe               | Neto1            | Prkca                                 |
| Scg2              | Vim              | Nrl                                   |
| Cyp1a2            | Obox2            | Pln                                   |
| Sh2b2             | Adcy7            | Tm4sf1                                |
| Fam126a           | Ptpla            | Tceal3///Tceal5///Tceal6              |
| Sec16b            | Pofut1           | Gadd45b                               |
| Nr4a2             | Sf3b2            | Cacng4                                |
| Zppb              | Shroom1          | Gpc3                                  |
| Cdh11             | Limd2            | Dnajb7                                |
| Cntnap2           | Cnn3             | Meis1                                 |
| Bmp6              | Ubxn10           | Xdh                                   |
| 3632451O06Rik     | Ppargc1a         | Rnf151                                |
| Hmga2             | Rcbtb1           | Ifrd2                                 |
| Reck              | C1ra///C1rb      | Hcn3                                  |
| Trip4             | Rab3il1          | Akr1c21                               |
| Rhpn1             | Mela             | Trpc4                                 |
| Tg                | Zfp574           | Scyl1                                 |
| Avp               | Wdr33            | Zfp474                                |
| Cbx1              | Trim30a///Trim3  | Stxbp4                                |
| Adam21            | Osbpl6           | Ggt7                                  |
| Bcl2a1a///Bcl2a1  | Dapk3            | Esyt1                                 |
| Capn15            | Eras             | Vash2                                 |
| Lyz1              | Tcf15            | Nup133                                |
| Hoxc5             | Nnt              | Aacs                                  |
| Serpinh1          | Ndn              | Fbln1                                 |
| F2r               | AU018829///Gm    | Vopp1                                 |
| Arvcf             | Chst11///Phactr: | Calb2                                 |
| Col1a2            | Eif4ebp2         | Celf2                                 |
| Dclk1             | Bsg              | Aen                                   |
| Mrps24            | Wipi1            | Crabp2                                |
| Lipa              | Sarnp            | Scara5                                |
| Cfh               | Ubqln2           | Scamp5                                |
| Gpr137b           | 4930414L22Rik    | Rerg                                  |
| Cd36              | Eya4             | Jkamp                                 |
| Cox16             | Serpinh1         | Lamb1                                 |
| Tmem167           | Armxc2           | Rnpep                                 |
| Cap2              | Gpm6a            | Pxk                                   |
| B4galt6           | Ergic3           | Fabp4                                 |

|                  |               |                                           |
|------------------|---------------|-------------------------------------------|
| Tgfb2            | Zfp14         | Frmd6                                     |
| Tgfb2            | Rasal3        | Tram11                                    |
| Hdgfrp3          | C80360        | Pdzd11                                    |
| Pnn              | C76472        | Ntmt1                                     |
| Gdap1            | Iqgap2        | Aif1                                      |
| Cspg4            | Sema7a        | Dclk1                                     |
| Nrl              | Cdr2l         | Rrp9                                      |
| Smc3             | Ggnbp2        | Ctsl                                      |
| Yme1l1           | Bub3          | Gm11787///Lyn                             |
| Sqstm1           | Mir425        | Abhd14b                                   |
| Tm4sf1           | AA517562      | Tmed1                                     |
| Tceal3///Tceal5/ | Cacna1a       | Inpp5b                                    |
| Cacng4           | Thyn1         | Zfp521                                    |
| Adprm            | Aldh7a1       | Acrbp                                     |
| Tdgf1            | Slbp          | Nisch                                     |
| Gpc3             | Lasp1         | Spon1                                     |
| Meis1            | Sfrp1         | Tmem119                                   |
| 1700019N19Rik    | Itpr1         | Mtap                                      |
| Cnnm2            | Grasp         | Ino80e                                    |
| Rnf151           | Fbn1          | Deptor                                    |
| Nol11            | Usp39         | Pnpla7                                    |
| Ror1             | Pkd1          | Polr3gl                                   |
| Lrp6             | Pcp4          | Alg1                                      |
| Hcn3             | Polr1a        | Ccdc107                                   |
| Arl1             | Snx2          | Mrap                                      |
| Bcl2l2           | Trap1a        | Chuk                                      |
| Rock2            | Stag3         | Dpp6                                      |
| Syt13            | Guca2b        | Pcsk5                                     |
| Orm1             | St3gal5       | Nop16                                     |
| Zfp474           | Sostdc1       | 1810011O10Rik                             |
| Pex5l            | Zfp105        | Brca1                                     |
| Stxbp4           | Cmtm7         | Spsb4                                     |
| Txndc5           | Gtf2i         | Dhx58                                     |
| Vash2            | Grap2         | Egfl7                                     |
| Tbc1d22a         | Itga9         | Slit2                                     |
| Nup133           | Timp2         | Cux1                                      |
| Fbln1            | Lpin2         | Chodl                                     |
| Pink1            | Smarca1       | Antxr1                                    |
| Cyhr1            | Il6st         | Gca                                       |
| Celf2            | Nphs2         | Thns12                                    |
| Vldlr            | Nr3c1         | Ahctf1                                    |
| Hsbp1            | Akt3          | Ifnar2                                    |
| Lrrc49           | Ict1          | Prr5                                      |
| Nrros            | Tal2          | Ears2                                     |
| Spcs3            | Pik3ca        | Plxnd1                                    |
| Crabp2           | B4galt6       | Tmem53                                    |
| Tmx1             | Tm9sf2        | Ccsap                                     |
| Scara5           | Sh3kbp1       | Csnk1a1                                   |
| Prrc1            | Mad2l2        | Cadps2                                    |
| Scamp5           | Asrgl1        | Ushbp1                                    |
| Cend1            | Rtfdc1        | Mef2c                                     |
| Rerg             | Dnm1          | Mef2c                                     |
| Jkamp            | Hspa12b       | Serpina1b                                 |
| Lamb1            | Gnao1         | Glyat                                     |
| Zfp422           | Slc1a1        | Steap1                                    |
| Pxk              | Eny2          | Chil1                                     |
| Fabp4            | Nudcd3        | Mpi                                       |
| Tram11l          | Ccdc117       | Ssbp2                                     |
| Dusp18           | Fbln7         | Krt84                                     |
| Fus              | Zdhhc1        | Art5                                      |
| Aif1l            | Obsl1         | Uroc1                                     |
| 1810043G02Rik    | Lincpint      | Gm16340///Ifi203///LOC100862473///LOC102f |
| Dclk1            | 2700089E24Rik | Zbtb20                                    |
| Tmod2            | Ednra         | Mmgt2                                     |
| Lgalsl           | Nabp1         | Cplx4                                     |
| Vcam1            | Cdc23         | Ces3a///Ces3b                             |
| Gm11787///Lyn    | Trim46        | A530016L24Rik                             |
| Cmb1             |               | Sep-11 Klk1b21                            |
| Abhd14b          | Trim16        | Amelx                                     |
| Zfp521           | Prpf19        | Psg-ps1                                   |
| Acrbp            | Yars          | []                                        |
| Nisch            | Ap1g1         | Slc1a2                                    |
| Spon1            | Ilf3          | Ankrd33                                   |
| Tmem119          | Klhdc2        | Armc1                                     |
| Acer2            | Ehmt2         | Cebpg                                     |
| Lpcat1           | Dnajc21       | Rab4b                                     |
| Polr3gl          | Tspyl1        | Fam161a                                   |
| Ccdc107          | Mtch1         | Slc12a5                                   |
| Ugt3a1           | Soat2         | Alas2                                     |
| Utp6             | Mc5r          | Srxn1                                     |
| Chuk             | Ap2a1         | BC089597                                  |
| Gemin8           | Ercc2         | Amelx                                     |
| Pcsk5            | Rock1         | Ednra                                     |
| Slit2            | Slc35c2       | Fgf12                                     |
| Clec2h           | A630038E17Rik | Evc                                       |
| Chodl            |               | Cmtm7                                     |
| Ccdc104          |               | Slc41a3                                   |
| Gca              |               | Mafb                                      |
| Pcdh20           |               | Mafb                                      |
| Ifnar2           |               | Mtmr6                                     |
| Mfap3            |               | Pik3r1                                    |
| Mtg2             |               | Ogt                                       |
| Cntln            |               | Atg12                                     |
| Plxnd1           |               | Irak4                                     |
| Tmem53           |               | Apobec1                                   |
| Zfp940           |               | Flt1                                      |
| Syn1             |               | Lamc3                                     |
| Luc7l3           |               | Hmgcr                                     |
| Cadps2           |               | Ncf1                                      |
| Ushbp1           |               | Ddx60                                     |
| Mef2c            |               | Crtc3                                     |
| Mef2c            |               | Nfatc2ip                                  |

|                               |          |
|-------------------------------|----------|
| Usp43                         | Tfpi     |
| Glyat                         | Tfpi     |
| Fbxw2                         | Klhl24   |
| Sgtb                          | Tom1l2   |
| Steap1                        | Adam22   |
| Ssbp2                         | Diras1   |
| Fbxo21                        | Scrn2    |
| Upp2                          | Nox4     |
| Art5                          | Acs14    |
| Uroc1                         | Nf2      |
| Zfp810                        | Ap3b2    |
| Gm16340///lfi203///LOC1008624 | Pde7a    |
| Fam92a                        | Ncor2    |
| Bcl9                          | Lmn2b    |
| Zbtb20                        | Prlr     |
| Ttr                           | Csn3     |
| Ppp6r2                        | Fktn     |
| Cplx4                         | Notum    |
| Pax4                          | Trim30a  |
| Dyx1c1                        | Arhgap6  |
| Tspan33                       | Kcnj6    |
| Cxcl17                        | Brd4     |
| Hrnr                          | Ghr      |
| Amelx                         | Eda      |
| Ces4a                         | []       |
| Psg-ps1                       | Dysf     |
| Golph3l                       | Magi1    |
| Lmbrd1                        | Scn8a    |
| []                            | Adam33   |
| Lbh                           | Mx1      |
| Ighg                          | Ubxn10   |
| Gngt1                         | Sec14l1  |
| Airn                          | Prpf4b   |
| Slc22a29///Slc22a30           | Cd6      |
| Ankrd33                       | Ace      |
| Prol1                         | Fgfr1    |
| Armc1                         | Cct3     |
| Rsrc2                         | Nfat5    |
| Kif1b                         | Rftn2    |
| Fam161a                       | Edn1     |
| Zfp825                        | Rad18    |
| Clmn                          | H2-D1    |
| Trim3                         | Srpx     |
| Slc12a5                       | Fcgr2b   |
| Alas2                         | Tnfsf11  |
| Arxes1///Arxes2               | Smr2     |
| Cant1                         | Il1f10   |
| Ednra                         | Vegfa    |
| Fgf12                         | Parp3    |
| Cmtm7                         | Uba5     |
| Gabra6                        | Loxl1    |
| Slc41a3                       | Mapre2   |
| Oscar                         | Mapre2   |
| Wnt9b                         | Epha7    |
| Prpf4b                        | Ldb3     |
| Dbn1                          | Nfe2     |
| Pik3r1                        | Rbm14    |
| Ddit4l                        | Calca    |
| Flt1                          | Uxs1     |
| []                            | Atp10a   |
| Lamc3                         | Igf1     |
| Hmgcr                         | Cypr1    |
| Ncf1                          | Col4a1   |
| Kifap3                        | Vstm2a   |
| Tfpi                          | Epsti1   |
| Tfpi                          | Zbed3    |
| Klhl24                        | Chst15   |
| Tom1l2                        | Arl16    |
| Ccdc25                        | Igf1r    |
| Vegfb                         | Rab23    |
| Phip                          | Plk4     |
| Suv420h1                      | Rrp1b    |
| Nox4                          | Fbxo22   |
| Nf2                           | Pth2r    |
| Prlr                          | Tmem175  |
| Fktn                          | Slc6a1   |
| Notum                         | H6pd     |
| Arhgap6                       | Ets1     |
| Jmy                           | Chpf2    |
| Speg                          | Meg3     |
| Dysf                          | Prcp     |
| Kl                            | Pde2a    |
| Magi1                         | Lmna     |
| Scn8a                         | Ccdc117  |
| Sema6c                        | Dnajc10  |
| Kynu                          | Mndal    |
| Prpf4b                        | Galnt7   |
| Ace                           | Tmem191c |
| Fgfr1                         | Medag    |
| Cct3                          | Prickle1 |
| Trim15                        | Col6a2   |
| Nfat5                         | Nbea     |
| Lman1l                        | Cidec    |
| Rftn2                         | Tenc1    |
| Rad18                         | Cubn     |
| Glra4                         | Arsg     |
| Sntb1                         | Cfp      |
| Srpx                          | Rassf8   |
| Fcgr2b                        | Ptprz1   |
| []                            | Msi1     |
| Vegfa                         | Pmepa1   |
| Mia2                          | Rmdn1    |

|                          |                                       |
|--------------------------|---------------------------------------|
| Parp3                    | Kif11                                 |
| Loxl1                    | Mxra8                                 |
| Casd1                    | 4930427A07Rik                         |
| Irx1                     | Adamts7                               |
| Mapre2                   | Zfp518b                               |
| Mapre2                   | Ldlrad4                               |
| Epha7                    | Lmod2                                 |
| Ldb3                     | Ifi204///Ifi205///Mnda///Mndal        |
| Nfe2                     | Brd8                                  |
| Dlat                     | 2810459M11Rik                         |
| Chrna3                   | Rai2                                  |
| Atp10a                   | Trim16                                |
| Igf1                     | Csgalnact1                            |
| Cyyr1                    | Zfp444                                |
| Baalc                    | Malat1                                |
| Col4a1                   | Epha7                                 |
| Zfp281                   | Dnm3os///Mir214                       |
| Vstm2a                   | Enpp3                                 |
| Pja1                     | Wipi1                                 |
| Chst15                   | Akna                                  |
| Vimp                     | Pice1                                 |
| Arl16                    | Erdr1                                 |
| Igf1r                    | Spag4                                 |
| Mtrr                     | Gpr31b                                |
| Fyb                      | Fes                                   |
| Fbxo22                   | Il6ra                                 |
| Slc6a1                   | Pclo                                  |
| H6pd                     | Tfpi                                  |
| Lrpap1                   | Gm21451///Loxl2                       |
| Chpf2                    | Tnfsf12///Tnfsf12Tnfsf13              |
| Srebf2                   | Slc41a2                               |
| Meg3                     | Myof                                  |
| Pde2a                    | Myh1                                  |
| Ccdc117                  | []                                    |
| []                       | Gm11767                               |
| Mndal                    | Atp11c                                |
| Tmem191c                 | Smok3a///Smok3b///Smok3c              |
| Medag                    | Cd247                                 |
| Nova1                    | Itgb1                                 |
| Col6a2                   | []                                    |
| Nbea                     | Kdm5d                                 |
| Cidec                    | LOC102632747                          |
| Tenc1                    | Ercc6l2                               |
| Cubn                     | []                                    |
| Arsg                     | Rprd1b                                |
| Cfp                      | Zfp688                                |
| Farp1                    | Ptk7                                  |
| Rassf8                   | Gm9780///Plac9a///Plac9b              |
| Msi1                     | Adamts4                               |
| Snx19                    | Ai413582                              |
| Slit3                    | Agbl3                                 |
| Atp1a2                   | Lrrtm1                                |
| Dmgdh                    | Rufy2                                 |
| 2810002D19Rik            | Aak1                                  |
| Hoxb9                    | Enpp4                                 |
| Zfp82                    | Mbd3l2                                |
| Iqsec1                   | Myl1                                  |
| Mxra8                    | Ap1s2                                 |
| Mfsd8                    | Klhl7                                 |
| 4930427A07Rik            | Svop                                  |
| Itsn1                    | Ttc27                                 |
| Adamts7                  | Rab2b                                 |
| Zfp518b                  | Myl9                                  |
| Apbb2                    | Snrnp40                               |
| Ldlrad4                  | Klf9                                  |
| Ifi205///Mnda            | Rps4l                                 |
| Rai2                     | Gm10340///Gm10409///Gm16525///Gm2897/ |
| Magi1                    | Trak1                                 |
| Malat1                   | Ebf3                                  |
| Epha7                    | Lepre1                                |
| Dnm3os///Mir214          | Hba-a1///Hba-a2                       |
| Enpp3                    | Rrbp1                                 |
| Wipi1                    | Pigk                                  |
| Akna                     | Lphn1                                 |
| Hoxa11os                 | Lpin2                                 |
| Wtap                     | Il6st                                 |
| Gpr31b                   | Ppfia4                                |
| Fes                      | Pcp4l1                                |
| Hoxc8                    | Pgp                                   |
| Peak1                    | 2810408M09Rik                         |
| Il6ra                    | Pitpnc1                               |
| Tfpi                     | Pitpnc1                               |
| Gm21451///Loxl2          | Rftn2                                 |
| Ccdc167                  | Ube2c                                 |
| Tnfsf12///Tnfsf12Tnfsf13 | Krtap3-2///Krtap3-3                   |
| Napb                     | Tril                                  |
| Ercc6l2                  | Cntn1                                 |
| Ankrd26                  | Prpf31                                |
| Prr15                    | Rgs8                                  |
| Alpk2                    | Batf3                                 |
| Copg2os2                 | Snapc3                                |
| Ap2a2                    | Col22a1                               |
| Gm11767                  | Obox1///Obox2                         |
| Cyp2c38                  | Polr3e                                |
| Lamc2                    | Plscr1                                |
| Ptms                     | Smpd4                                 |
| Usp9y                    | Oasl2                                 |
| Pax7                     | Rai1                                  |
| Sox5                     | Dhx30                                 |
| Nf1                      | Pgm1                                  |
| Pax6                     | Ankrd33b                              |
| P2rx4                    | Anapc5                                |



|                          |                        |
|--------------------------|------------------------|
| Ceacam1                  | Khdrbs3                |
| Igk-V1///Igkv9-120       | Fndc1                  |
| Defb11                   | Angptl4                |
| Gm1549                   | Gnas                   |
| Ofa                      | Csnk2a1                |
| Slco1b2                  | Slamf7                 |
| []                       | Far1                   |
| Iscu                     | LOC102643054           |
| Rprd1b                   | Fem1a                  |
| Ptk7                     | Stx8                   |
| Gm9780///Plac9a///Plac9b | Serpinf1               |
| Tceb1                    | Ccnl2                  |
| Adamts4                  | Pitpnc1                |
| AI413582                 | Dtl                    |
| 1700001C19Rik            | Fam110a                |
| Agbl3                    | Ndst3                  |
| Lrrtm1                   | BC051212               |
| Senp6                    | Hspa9                  |
| Rufy2                    | Pi16                   |
| Dnm1l                    | Pabpc1                 |
| Enpp4                    | Zbed3                  |
| 3110007F17Rik            | Gadd45g                |
| Ndufa13///Yjefn3         | Zbtb46                 |
| Klra1///Klra22           | Rdh14                  |
| Ap1s2                    | Xk                     |
| Klhl7                    | 1700120B22Rik          |
| Tmcc2                    | Ptrf                   |
| Rab2b                    | Ptgfr                  |
| Rab2b                    | Gm9706                 |
| Myl9                     | Mrps5                  |
| Pnpt1                    | Cdk14                  |
| Prpf39                   | Pfn3                   |
| Luc7l                    | Med1                   |
| Rps4l                    | Fam122a                |
| Lepre1                   | Ercc6l2                |
| Creld2                   | Lig3                   |
| Hba-a1///Hba-a2          | Stxbp4                 |
| Rrbp1                    | Cenpo                  |
| Gm6793///Hnrnpa3         | Fmo2                   |
| Pigk                     | Ubxn8                  |
| Lphn1                    | Zfp142                 |
| Lpin2                    | Prmt3                  |
| Il6st                    | Ephb2                  |
| Pou6f1                   | Chpf                   |
| Ppfia4                   | Ppp6r3                 |
| Med12l                   | Flt1                   |
| Znhit3                   | Ddhd1                  |
| Scaf11                   | Lmo2                   |
| Rian                     | Pdss1                  |
| Galc                     | Cxhc1                  |
| Pitpnc1                  | Mknk1                  |
| Pitpnc1                  | Pcgf6                  |
| Rftn2                    | Stk31                  |
| Cntn1                    | Ccnc                   |
| Fam166a                  | Pla2g2d                |
| Tspo2                    | Clpb                   |
| Rgs8                     | Ercc8                  |
| Batf3                    | Ikbkb                  |
| Col22a1                  | Dnajc2                 |
| 3110079O15Rik            | Rpgrip1                |
| Obox1///Obox2            | Cyba                   |
| Surf2                    | Nfatc4                 |
| Ptdss2                   | Kcnip1                 |
| Plscr1                   | Dpysl3                 |
| 2700089E24Rik            | Cpa2                   |
| Dhx30                    | Iffo1                  |
| Wbscr25                  | Iffo1                  |
| Eqtn                     | Tmem229b               |
| Ankrd33b                 | Etnk1                  |
| Anapc5                   | Rpl41                  |
| Khdrbs3                  | Mbp                    |
| Fndc1                    | Zranb2                 |
| Tex9                     | Fez1                   |
| Sh2b2                    | Snhg1                  |
| Csnk2a1                  | Rhbdd3                 |
| Timm10b                  | Pten                   |
| Rps6                     | Map1s                  |
| Abhd15                   | Dusp9                  |
| Ppp2r3c                  | Aamp                   |
| Lta4h                    | Ficd                   |
| Far1                     | []                     |
| Hba-a1                   | Serinc1                |
| Hbs1l                    | Apccd1                 |
| Rad23a                   | Rpl35                  |
| Rnf41                    | Pkdcc                  |
| Obp1a                    | Clu                    |
| Derl3                    | Mettl7a1               |
| Cep55                    | Phldb2                 |
| Serpinf1                 | Slc9a8                 |
| Angel2                   | Slc52a2                |
| Pitpnc1                  | Upk3b                  |
| Ccdc34///LOC102632005    | Zbtb46                 |
| Ndst3                    | Amot                   |
| BC051212                 | Cds2                   |
| Orc4                     | 6330509M05Rik///Slc9a7 |
| BC065403                 | Ngfr                   |
| 1110035H17Rik            | Tbcel                  |
| Eed                      | Psma5                  |
| Pi16                     | Atcay                  |
| Zbed3                    | Slc5a2                 |
| Gadd45g                  | Ckap4                  |
| Zbtb46                   | Nhsl2                  |

|                             |                                        |
|-----------------------------|----------------------------------------|
| 1700120B22Rik               | Slc25a4                                |
| Tiam1                       | Ckb                                    |
| Ptrf                        | Nlgn2                                  |
| Eif2ak1                     | Syt11                                  |
| Gm9817                      | Myzap                                  |
| Ptgfr                       | Rps24                                  |
| Sdccag8                     | Pitpnc1                                |
| Xrcc2                       | Mrps11                                 |
| Igf2bp3                     | Ldhd                                   |
| Pfn3                        | Rprd2                                  |
| Fam122a                     | Rgs16                                  |
| Lig3                        | BC094435                               |
| Ide                         | Fcgr2b                                 |
| Cenpo                       | A4galt                                 |
| Cts3                        | Bai1                                   |
| Fmo2                        | Cp                                     |
| Zfp142                      | Fam131b                                |
| Prmt3                       | Sep-04                                 |
| Chpf                        | Lgals1                                 |
| Flt1                        | Acadsb                                 |
| Pibf1                       | D430019H16Rik                          |
| Thumpr3                     | Cyp2c54                                |
| Ddhd1                       | Adcy2                                  |
| Lmo2                        | Gpr133                                 |
| Cxxc1                       | Lasp1                                  |
| Ccnc                        | Pigr                                   |
| Grk4                        | Syne1                                  |
| Ercc8                       | Col1a1                                 |
| Kif2c                       | Cnn3                                   |
| Eri2                        | Csn1s2a                                |
| Gpa33                       | Gm20559                                |
| Cyba                        | C1qtnf1                                |
| Cbx3///Gm5792///Gm6901///Gm | Cklf                                   |
| Adam1b                      | Tspan17                                |
| Nfatc4                      | Tardbp                                 |
| Cd80                        | Tial1                                  |
| Tspan12                     | Gm1976                                 |
| Ttr                         | Taok3                                  |
| Dpysl3                      | Vprbp                                  |
| Cpa2                        | Abcc8                                  |
| Iffo1                       | Gtpbp8                                 |
| Iffo1                       | Ndn                                    |
| Etnk1                       | 4922502D21Rik                          |
| Fez1                        | Eif3l                                  |
| Timp2                       | Vasn                                   |
| Sec62                       | Scarb1                                 |
| Pten                        | Lnx1                                   |
| Map1s                       | Pomc                                   |
| C230052112Rik               | Txn1                                   |
| Ficd                        | Nanos1                                 |
| []                          | Lrrtm1                                 |
| Serinc1                     | Rspo2                                  |
| Apcdd1                      | Mvb12a                                 |
| Pkdcc                       | Slc2a3                                 |
| Slc9a8                      | Socs3                                  |
| Slc52a2                     | Tgm2                                   |
| Rbbp4                       | Chpt1                                  |
| Zbtb46                      | Adrb3                                  |
| Amot                        | Chrna3                                 |
| Cds2                        | Rbpms                                  |
| Fam189b                     | Atp1b1                                 |
| Gm561                       | Ceacam11                               |
| Pasma5                      | Adamts4                                |
| Rprd1a                      | Klk1                                   |
| Ntn1                        | Matn2                                  |
| Gabbr1                      | Sec61a1                                |
| Nhs12                       | Gjc2                                   |
| Mia3                        | Ddx18                                  |
| Slc25a4                     | Xpa                                    |
| Akr1d1                      | Arf3                                   |
| Ckb                         | Preb                                   |
| Nlgn2                       | Polr1a                                 |
| Akap9                       | Elmo2                                  |
| Syt11                       | BC089491                               |
| Ahi1                        | Rnf112                                 |
| Pitpnc1                     | Kifc5b                                 |
| Cml2                        | []                                     |
| Mrps11                      | Calr                                   |
| Rprd2                       | Mela                                   |
| 1110004E09Rik               | Svs2                                   |
| Wdr33                       | Acsm2                                  |
| Pigx                        | Gm13889                                |
| Fcgr2b                      | Socs3                                  |
| A4galt                      | Mbp                                    |
| Masp1                       | Ap1s2                                  |
| Bai1                        | Gm5481///Gm6109///Gm6570///Gm7429///Rf |
| Sep-04                      | Vim                                    |
| Lgals1                      | Adcy7                                  |
| D430019H16Rik               | Lasp1                                  |
| Adcy2                       | Acbd3                                  |
| Gpr133                      | Gas1                                   |
| Fam21                       | Cep68                                  |
| 3110057012Rik               | Arhgap6                                |
| Elavl3                      | Klf9                                   |
| Hnrnp3                      | Shroom1                                |
| Syne1                       | Limd2                                  |
| Col1a1                      | Dner                                   |
| Ighv14-2                    | Cnn3                                   |
| Mfsd4                       | Zic4                                   |
| Mrs2                        | Zfp64                                  |
| Cps1                        | C1ra///C1rb                            |
| Serinc3                     | Mical1                                 |

| <b>Magnúsdóttir et al</b> | <b>Doody et al</b> | <b>Shaffer et al</b> | <b>Mould et al</b> |
|---------------------------|--------------------|----------------------|--------------------|
| Tcea1                     | CXorf42            | FCRL5                | U6                 |
| Tcea1                     | NR3C1              | BCL11A               | Tcea1              |
| Tcea1                     | TAPBP              | HLA-DMB              | Vcpip1             |
| Tcea1                     | NFIX               | IL10                 | Sgk3               |
| Rgs20                     | C14orf43           | HLA-DPA1             | Slco5a1            |
| Rgs20                     | RBCK1              | CD53                 | SNORA17            |
| Rgs20                     | ADAMTS6            | PRKCB1               | Il17a              |
| Rgs20                     | BTN3A3             | CD68                 | Mcm3               |
| Rrs1                      | FOXP1              | PMAIP1               | U6                 |
| Adhfe1                    | GLI3               | LMO2                 | Ptpn18             |
| Rrs1                      | INPPL1             | CTSB                 | 4632411B12Rik      |
| Adhfe1                    | KLHDC9             | CD27                 | Zap70              |
| Vcpip1                    | LOC644974          | CXCL10               | Vwa3b              |
| AK006607                  | MRPS23             | SYK                  | Inpp4a             |
| Vcpip1                    | PTPN18             | CCL5                 | Wdr75              |
| AK006607                  | RPL10A             | AKT2                 | Stat1              |
| Sgk3                      | SP100              | IL16                 | Stat1              |
| Sgk3                      | SP110              | PTPN6                | Stat1              |
| Sgk3                      | ZSCAN2             | TNFAIP3              | Inpp1              |
| Cops5                     | TLN1               | FCER1G               | Rftn2              |
| Cops5                     | C22orf32           | GCET2                | Plcl1              |
| Cspp1                     | APOL3              | CR2                  | Nbeal1             |
| Cspp1                     | C14orf181          | ACTB                 | Rpl17-ps1          |
| Cspp1                     | CCDC28B            | HLA-DMA              | Nrp2               |
| Cspp1                     | CWF19L1            | MYBL1                | Nrp2               |
| A830018L16Rik             | IFIT2              | TXNIP                | AC167197.1         |
| A830018L16Rik             | SPC25              | MYO1E                | Gm216              |
| Sulf1                     | ZHX1               | TLR10                | Vil1               |
| Slco5a1                   | ORC4L              | HLA-DOA              | Ttll4              |
| Slco5a1                   | TRIM34             | AFF3                 | Stk11ip            |
| Slco5a1                   | LRRc41             | AIM2                 | SNORA17            |
| Slco5a1                   | TNRC6B             | CD24                 | Irs1               |
| Slco5a1                   | SLC25A22           | CD37                 | Pid1               |
| Slco5a1                   | PSMB8              | GSTP1                | Sp110              |
| AK015384                  | STAT6              | VNN2                 | Rpl30-ps6          |
| Rpl7                      | LMO2               | IRF8                 | Alpl2              |
| Rdh10                     | PSMB10             | hCG_1998957///HLA-   | Eif4e2             |
| Tceb1                     | PVRIG              | SREBF2               | Gigyf2             |
| Tceb1                     | RBM25              | MGLL                 | D130058E05Rik      |
| Tmem70                    | RNASEL             | KPNB1                | Scly               |
| Tceb1                     | TRIM44             | AICDA                | Stk25              |
| Tceb1                     | BCAT1              | ISG20                | Gm3608             |
| Tmem70                    | PXMP4              | EIF4EBP1             | Gm10193            |
| Tceb1                     | C2CD2              | PAG1///PRDX1         | U6                 |
| Tceb1                     | KIF18A             | CSK                  | Zcchc2             |
| Tmem70                    | NDUFA5             | SLC2A5               | Slc35f5            |
| Jph1                      | ELL3               | FCRL4                | Gpr39              |
| Tcfap2d                   | NUB1               | BCL6                 | Ccnt2              |
| Tcfap2d                   | RPS6               | LYN                  | Rassf5             |
| Efhc1                     | TNFRSF10B          | SPIB                 | Elk4               |
| 4921533L14Rik             | FAM123B            | IFI16                | Sox13              |
| 4921533L14Rik             | ACSS2              | SP140                | SNORA32            |
| 4921533L14Rik             | EHD1               | BCL2A1               | Zc3h11a            |
| Col19a1                   | FCRL4              | CD69                 | Gm3834             |
| Col19a1                   | IL28A              | BLNK                 | Cacna1s            |
| Bai3                      | NEGR1              | ARPC2                | 5730559C18Rik      |
| Bai3                      | OR6K2              | PCSK4///SUB1///IFRC  | AC125186.1         |
| B230209C24Rik             | C11orf67           | RGS18///RGS13        | SNORA17            |
| Bpag1                     | RALY               | DNMT1                | 5S_rRNA            |
| Bpag1                     | PIK3CA             | MYO1B                | Cfhr1              |
| Bpag1                     | TMEM179B           | CDC123               | Trove2             |
| Bpag1                     | AMY1A              | RB1                  | Fam5c              |
| Dst                       | ATF3               | CAMK1                | U6                 |
| Bpag1                     | PSMA4              | PEA15                | Rgl1               |
| Bpag1                     | YWHAH              | CIITA                | Smg7               |
| Bpag1                     | KRT85              | CHKA                 | Smg7               |
| Dst                       | PEX12              | PSMB9                | Glul               |
| Ptpn18                    | ASB8               | TUBB                 | Gm9530             |
| Ptpn18                    | DUSP10             | FTL                  | Tor1aip1           |
| AK082264                  | MAN1C1             | PCDHGC3              | Fam20b             |
| Arid5a                    | DYNC1I2            | PARP1                | Gas5               |
| Arid5a                    | HDGF2              | POU2F2               | Prdx6              |
| 4632411B12Rik             | BTN3A2             | GOT2                 | Al848100           |
| 4632411B12Rik             | ITGB7              | NAPSB                | Prrc2c             |
| 1700024G10Rik             | UBR2               | OAS1                 | Brp44              |
| 1700024G10Rik             | RNF219             | PA2G4                | Gpa33              |
| Tsga10                    | TPD52L1            | YWHAQ                | Uck2               |
| Tsga10                    | FAM129C            | FTH1                 | Uap1               |
| Tsga10                    | HIRIP3             | WIPF1                | Uap1               |
| Tsga10                    | HMBOX1             | FCRLA                | Uap1               |
| Tsga10                    | CIITA              | IGLC2                | U1                 |
| AK039030                  | TMEM79             | PTDSS1               | 1700009P17Rik      |
| Lipt1                     | EPHA4              | RHOH                 | B4galt3            |
| Npas2                     | RLIM               | MTHFD2               | Ncstn              |
| Map4k4                    | AIM2               | ITGB7                | Dcaf8              |
| Map4k4                    | CLEC4A             | ATP2A3               | Apcs               |
| Il1r1                     | C10orf4            | PTPRC                | U2                 |
| Il1r1                     | KIAA1680           | PCDHB16///ME1        | Sdccag8            |
| BC058417                  | CHM                | CCL4                 | Gm17407            |
| BC059892                  | ZFP36L1            | FLII///FLI1          | 4930527J03Rik      |
| AK019154                  | CUEDC1             | SLC25A37///MSC       | Efcab2             |
| AK048630                  | ALG10              | TMSB4X               | Gm15480            |
| Pou3f3                    | WDR5               | IGJ                  | Scppdh             |
| AK053590                  | MYL6               | ID3                  | Adck3              |
| AK019154                  | RFX5               | CCL3                 | Acbd3              |
| AK048630                  | ANGEL2             | BNIP3L               | Cnih4              |
| AK011913                  | HEATR1             | DAXX                 | 5S_rRNA            |
| AK019154                  | HNRNPk             | ZFP36L2              | Srp9               |
| AK048630                  | KCNH8              | BCL7A                | Degs1              |
| AK011913                  | MTHFS              | TACC3                | Tlr5               |
| AK019154                  | NME7               | DUSP12///DUSP1       | Dusp10             |
| AK048630                  | TSLP               | C6orf108             | Dusp10             |
| AK011913                  | MCFD2              | ID2                  | Mosc2              |
| Tpp2                      | WIBG               | MCM7                 | Mosc2              |
| Tpp2                      | CCNB1IP1           | BIRC4                | Mir194-1           |
| 1700029F09Rik             | SART3              | GADD45B              | Gpatch2            |
| 1700029F09Rik             | TBC1D22B           | ACTL6A               | AC124613.1         |
| Kdelc1                    | TMEM69             | XRCC5                | Atf3               |
| Kdelc1                    | SMPD3              | EBF1                 | Traf5              |
| Bivm                      | OSBPL3             | ST3GAL1              | U5                 |
| Bivm                      | BCAP31             | HLA-DRA              | 7SK                |
| Bivm                      | CYB5B              | PLEK                 | A130010J15Rik      |
| Col5a2                    | HIST2H2BF          | GMPS                 | 7SK                |
| Col5a2                    | PPFIBP2            | ACTG2                | AC109145.1         |
| AK133153                  | TMEM39A            | TLR1                 | Frm4a              |
| TMEFF2                    | FBXO16             | KLF10                | Optn               |
| Tmeff2                    | HAS3               | MARK2                | Upf2               |
| Stat1                     | INTS8              | XRCC6                | Gm13218            |
| Stat1                     | TAGLN3             | STAT6                | Prkcq              |
| Stat1                     | DCC                | CDK2                 | Il2ra              |
| Stat1                     | BRIP1              | CLPP                 | Fam23a             |
| Stat1                     | TMF1               | IL8                  | Mrc1               |
| Stat1                     | FAM82A2            | PAK3///CDKN1A        | Cacnb2             |
| Stat1                     | GJA8               | ISG15                | Gm13313            |
| Stat1                     | RFX1               | ICAM1                | Gm13334            |
| Stat1                     | SH3BP5L            | TRIP10               | Gm20539            |
| Stat1                     | EML2               | ST6GAL1              | Etl4               |
| Hspd1                     | MGAT2              | ANP32A               | Etl4               |
| Hspe1                     | SMS                | FYN                  | Arhgap21           |
| Plcl1                     | HIGD1A             | NOL5A                | Arhgap21           |
| 1110034B05Rik             | SSR2               | CDC37                | Gm13380            |
| 1110034B05Rik             | MORN2              | VEGFA                | Yme111             |
| 9430016H08Rik             | PIGR               | HSPA1B///HSPA1A      | AL732528.1         |
| Ppil3                     | AGK                | MAP2K1               | E130003G02Rik      |
| Ppil3                     | MEIS1              | GSK3A                | Fbxw5              |
| Ppil3                     | ADCK4              | DDIT3                | Lcn14              |
| Ppil3                     | KRT10              | RAP1B                | Gm13553            |
| Nif311                    | C10orf26           | PBEF1                | Qsox2              |
| Nif311                    | CCDC19             | SIAH2                | Vav2               |
| Nif311                    | CCL4               | IFITM1               | AA645442           |
| Trak2                     | CCL4L1#CCL4L2      | LRMP                 | Vav2               |
| PAPK-A                    | CCL4L1#CCL4L2      | GPR18                | Gfi1b              |
| Als2cr2                   | SDR39U3            | HLA-DQA1             | Gm13394            |
| Als2cr2                   | ELMOD3             | PLK1                 | 1700101E01Rik      |
| PAPK-A                    | NFE2L2             | IFITM2               | Gm13402            |
| PAPK-A                    | TECPR1             | MMP1                 | Gm14471            |
| Fzd7                      | OCIAD2             | MMP2                 | Ier5l              |
| Fzd7                      | ANKRD17            | DUT                  | Gm14486            |

|               |                   |                    |               |
|---------------|-------------------|--------------------|---------------|
| Sumo1         | SPATA4            | S100A4             | Fubp3         |
| Nol5          | HMGN4             | SLC25A21///ODC1    | Lamc3         |
| Bmpr2         | GGTLC1            | RAD23B             | Prrc2b        |
| Bmpr2         |                   | Sep-07 TOX4///LCP1 | Fam102a       |
| Nbeal1        | IVNS1ABP          | LCK                | Stxbp1        |
| Nbeal1        | LDB1              | PHKG2              | Fam129b       |
| Pard3b        | CMTM3             | BCKDHA             | 9430024E24Rik |
| Pard3b        | MTMR11            | CD74               | Mapkap1       |
| Nrp2          | ATXN7L2           | ADSS               | Phf19         |
| Nrp2          | INHBC             | TUBG1              | Gm13446       |
| Nrp2          | FANCF             | SOX4               | Zbtb6         |
| Nrp2          | RIOK2             | CDC20              | Lhx2          |
| Nrp2          | BCAN              | DLEU2              | Wdr38         |
| Nrp2          | ELA3A             | CD19               | Gm16523       |
| A430093A21Rik | PCDH18            | CD97               | U7            |
| AK017924      | POM121L1P         | NTHL1              | 1700019E08Rik |
| Klf7          | FLJ39739          | CD22               | Rnd3          |
| Klf7          | KIAA1712          | IL13RA2            | Rbm43         |
| Klf7          | LYRM7             | CD180              | Nmi           |
| Creb1         | UQCRC2            | MS4A2///MS4A1      | Gm13540       |
| Ikzf2         | ELMOD3            | IGKC               | Nr4a2         |
| Ikzf2         | SNRPF             | PSMB10             | Acvr1c        |
| AK084284      | PTPN6             | NFKBIA             | Ifih1         |
| AK084284      | GAL3ST4           | ITGAL              | Gca           |
|               | Mar-04 MVP        | IFNGR1             | Grb14         |
| Ankar         | SLC7A11           | TCF7L1///TCF3      | Mettl8        |
| Rpl37a        | QRSL1             | EBI3               | Itga6         |
| Rufy4         | GLT8D1            | IGHG3              | 8430437L04Rik |
| Slc11a1       | NRAS              | MCM7///MCM2        | Gm13666       |
| Ctdsp1        | MAGI2             | CYFIP2             | Gm13667       |
| CS444436      | TIPRL             | CD83               | AL772404.1    |
| mmu-mir-26b   | CALM2             | C5                 | Gm13699       |
| mKIAA0236     | ZNF385A           | CCL2               | Ctnnd1        |
| Zfp142        | LINS1             | CDKN2C             | Ube2l6        |
| Zfp142        | DLX4              | PRKDC              | Prg2          |
| Zfp142        | FOXS1             | PMS2L5             | Olfr1010      |
| Bcs1l         | RBBP5             | CKS1B              | Sfp1          |
| Bcs1l         | FUS               | IKZF1              | Ambra1        |
| Stk36         | ACSS1             | PKMYT1             | Ambra1        |
| Stk36         | HIST2H3A#HIST2H3C | MAP3K11            | Gm13802       |
| mKIAA0236     | HIST2H3A#HIST2H3C | PPP5C              | Cd82          |
| Zfp142        | KBTBD4            | MYBL2              | Cd82          |
| Zfp142        | MYC               | DHFR               | Gm13818       |
| Zfp142        | RNF13             | FCGR2C///FCGR2B    | Gm13889       |
| Bcs1l         | MAGEA1            | RPS6KA1            | Lrrc4c        |
| Bcs1l         | NUP107            | PCNA               | Cd44          |
| Stk36         | ZMAT3             | UCP2               | Hipk3         |
| Stk36         | SF3B14            | CD79A              | Pax6          |
| Prkag3        | RABIF             | PMP22///SP110      | Lgr4          |
| Prkag3        | RIC8A             | DEK                | Gm13930       |
| Prkag3        | RNF5P1            | GNAI2              | Scg5          |
| Wnt6          | ALS2              | TNFSF9             | 7SK           |
| Wnt10a        | C3orf25           | GNB1               | Fam82a2       |
| Fev           | MORN4             | TAF6               | Spint1        |
| Fev           | PBX2              | SCARB1             | Spint1        |
| Fev           | PRKRIR            | GNAS               | Ino80         |
| Fev           | SH2B3             | GLYAT///CAT        | Gm14383       |
| Fev           | TMEM205           | POLR1A///RPA1      | Itпка         |
| Nhej1         | C7orf59           | PSMB8              | Gm13998       |
| Slc23a3       | HIST1H2BK         | TANK               | Mga           |
| 1810031K17Rik | CYP1A1            | CXXC1///SPP1       | Snap23        |
| 1810031K17Rik | BBS9              | HADH               | Frmf5         |
| 1810031K17Rik | DEDD              | EIF2S2             | Frmf5         |
| 1810031K17Rik | GNAT1             | AURKA              | Frmf5         |
| BC038286      | GPR84             | POLD1///CDC2       | Frmf5         |
| BC038286      | RGS3              | GNB2               | Gatm          |
| Glb1l         | NUDT9             | POLD2              | Hdc           |
| Glb1l         | RGS3              | CTSS               | Gm14010       |
| Tuba4a        | ILF2              | IRF3               | Gm14006       |
| AK080399      | MGST2             | NOL3///MYC         | Spef1         |
| Dnajb10       | DHX35             | CORO1A             | Lamr1-ps1     |
| Dnajb10       | HSPA4L            | VPREB3             | Slc23a2       |
| Dnajb10       | DLL3              | HIST2H2AA3         | Fermt1        |
| AK039780      | RTDR1             | PAX5               | Tmx4          |
| Speg          | BUD31             | SH3KBP1            | Sec23b        |
| Speg          | C15orf57          | LDHA               | Dtd1          |
| Speg          | RAB3IL1           | EXOSC5             | Plk1s1        |
| Speg          | SPANXN5           | RASSF7             | Gm14129       |
| Accn4         | MFAP4             | C6orf32            | Fkbp1a        |
| Pax3          | ATN1              | ALOX5              | Tcf15         |
| Pax3          | TNPO3             | POU2AF1            | Rbck1         |
| Pax3          | ATP6V0D1          | BTK                | Trib3         |
| Pax3          | BLVRA             | STAP1              | Gm14472       |
| Pax3          | C10orf2           | SHC1               | BC029722      |
| Pax3          | SPANXE            | CD52               | Ndrf3         |
| Ap1s3         | CENPH             | ZFP36L1            | Bicap         |
| Trip12        | LYSMD1            | TRAF1              | Rprd1b        |
| Trip12        | PARP8             | CD44               | Tgm2          |
| Trip12        | C1QC              | CD86               | Tox2          |
| Fbxo36        | ALG9              | PRIM1              | Ttpal         |
| A630001G21Rik | MYO1B             | LGMN               | Pkig          |
| A630001G21Rik | THADA             | IGLL1              | Pkig          |
| A630001G21Rik | ZSCAN5A           | RPL21              | Pltp          |
| Cab39         | S100A6            | MCM4               | Gm11462       |
| Cab39         | ZDHHC4            | CKS2               | Ncoa3         |
| Cab39         | ATF6              | INPP5D             | Sulf2         |
| Itm2c         | ELA3B             | LGALS1             | Kcnb1         |
| B3gnt7        | PHB               | E2F1               | Gm17544       |
| Ptma          | UTP18             | DDR1               | AL589870.1    |
| Pde6d         | XAB2              | BLR1               | A530013C23Rik |
| Cops7b        | C6orf222          | FCER2              | Gm14260       |
| 6430706D22Rik | BMS1              | RNASEH2A///JUNB    | Bcas1         |
| A730008H23Rik | ELOVL1            | HLA-DPB1           | Ppp4r1l-ps    |
| A730008H23Rik | PKD1L1            | NPM1               | Gm14337       |
| 6430706D22Rik | UFM1              | SPI1               | Npepl1        |
| A730008H23Rik | CDK2AP2           | FCGRT              | BC066135      |
| A730008H23Rik | WDR54             | ARHGDI8            | Ogfr          |
| Centg2        | HNRNPA1L2         | TRAF5              | Mrps28        |
| AK036422      | CLIP4             |                    | Snx16         |
| Gbx2          | RARRES3           |                    | Car3          |
| Sned1         | TWF2              |                    | Cypt12        |
| Hdlbp         | C7orf55           |                    | Cyp7b1        |
|               | Sep-02 ZNF597     |                    | Armcl         |
| Pign          | GOLGA9P           |                    | Cp            |
| Pig-n         | GRINL1A           |                    | Slc2a2        |
| Pign          | C16orf71          |                    | Sec62         |
| 2310035C23Rik | NUCB1             |                    | 4930429B21Rik |
| 2310035C23Rik | SHMT2             |                    | Gm12532       |
| 2310035C23Rik | PRUNE             |                    | Fgf2          |
| Clasp1        | WFDC5             |                    | U1            |
| Clasp1        | ADAMTS13          |                    | Gm16508       |
| Clasp1        | POFUT1            |                    | Phf17         |
| Clasp1        | KCNQ1             |                    | Maml3         |
| Dbi           | NEU1              |                    | Eif2a         |
| Dbi           | OR56B4            |                    | RP23-445D13.2 |
| 3110009E18Rik | EEF1G             |                    | Schip1        |
| 3110009E18Rik | CSF1              |                    | Ppm1l         |
| En1           | LYSMD4            |                    | Gm17213       |
| Ddx18         | EVI5L             |                    | Pdcd10        |
| Ddx18         | AP3S2             |                    | Rapgef2       |
| Slc35f5       | DPCR1             |                    | Fbxw7         |
| Mgat5         | SMG7              |                    | Prrc          |
| Mgat5         | IGFN1             |                    | Crabp2        |
| Mgat5         | ALDH1B1           |                    | AW047730      |
| Mgat5         | C17orf63          |                    | Slc25a4a      |
| AK013506      | ZNF516            |                    | Sema4a        |
| Ccnt2         | LMCD1             |                    | Rusc1         |
| Ccnt2         | CCDC127           |                    | Adam15        |
| Ccnt2         |                   |                    | Adar          |
| Lct           |                   |                    | Ube2q1        |
| Pfkfb2        |                   |                    | Creb3l4       |
| Pfkfb2        |                   |                    | Dennd4b       |
| Pfkfb2        |                   |                    | Gm6097        |
| Pfkfb2        |                   |                    | BC021767      |
| Yod1          |                   |                    | Cdc42se1      |
| AA986860      |                   |                    | Mcl1          |
| Dyrk3         |                   |                    | Bcl9          |
| Lgtn          |                   |                    | Gm17608       |
| Lgtn          |                   |                    | Gm5544        |

Lgtn  
Lgtn  
Lgtn  
Srgap2  
Srgap2  
Srgap2  
2700049P18Rik  
Slc45a3  
Slc45a3  
Slc45a3  
Slc45a3  
Elk4  
Elk4  
Elk4  
Pctk3  
Lemd1  
Lemd1  
mmu-mir-135b  
Nuak2  
AK155877  
Nfasc  
Nfasc  
Nfasc  
Snrpe  
Zc3h11a  
Zc3h11a  
Zc3h11a  
Zc3h11a  
Zc3h11a  
Atp2b4  
Chit1  
Adora1  
Adora1  
Adipor1  
Adipor1  
Rabif  
Csrp1  
Csrp1  
Cacna1s  
5730559C18Rik  
5730559C18Rik  
5730559C18Rik  
5730559C18Rik  
Nek7  
Nek7  
Nek7  
Nek7  
Dennd1b  
Dennd1b  
AK019844  
Cdc73  
Trove2  
Uchl5  
AK144829  
Ptgs2  
Ivns1abp  
Ivns1abp  
1200016B10Rik  
1190005F20Rik  
1190005F20Rik  
1190005F20Rik  
1190005F20Rik  
1190005F20Rik  
1200016B10Rik  
1190005F20Rik  
1190005F20Rik  
1190005F20Rik  
1190005F20Rik  
1190005F20Rik  
1190005F20Rik  
Rgl1  
Rgl1  
Smg7  
Smg7  
Smg7  
Smg7  
Nmnat2  
Lamc1  
Npl  
Rgs16  
Rnasel  
Rnasel  
Rnasel  
Rnasel  
AK044033  
Glul  
AK029591  
Ier5  
Mr1  
Mr1  
Stx6  
Stx6  
Lhx4  
Lhx4  
Tor1aip1  
Lap1B  
Tor1aip2  
Ifrg15  
Ifrg15  
Ifrg15  
Tor1aip2  
Tor1aip2  
Tor1aip1  
Lap1B  
Tor1aip2  
Ifrg15  
Ifrg15  
Ifrg15  
Tor1aip2  
Tor1aip2  
Soat1  
Soat1  
Ralgps2  
Rasal2  
Rasal2  
Rasal2  
2810025M15Rik  
Sec16b  
Sec16b  
Sec16b  
Rfwd2  
Rabgap1l  
Rabgap1l  
Dars2  
Dars2  
Cenpl  
Cenpl  
Dars2  
Dars2  
Cenpl  
Cenpl  
Klhl20  
Klhl20  
Klhl20  
Klhl20  
Ankrd45  
AI848100  
AK135878  
Bat2d  
Bat2d  
Bat2d

Trim45  
Cd101  
Atp1a1  
Ngf  
U1  
Gm5546  
U6  
Wnt2b  
Dennd2d  
4933421E11Rik  
Csf1  
Ampd2  
1700010K24Rik  
Vav3  
Cdc14a  
Cdc14a  
Ccgc76  
snoCD11  
U6  
A530020G20Rik  
Gm4609  
Mir760  
Fnbp1l  
7SK  
Larp7  
Pla2g12a  
D630013G24Rik  
Gbp2  
Sh3glb1  
Clca5  
Ddah1  
Fam73a  
Usp33  
AI606473  
Depdc1a  
Wls  
Vmn1r-ps2  
Lyn  
snoU54  
Gm11803  
Tox  
Chd7  
2310030N02Rik  
Esrp1  
Rad54b  
Calb1  
Nbn  
U6  
U6  
RNaseP\_nuc  
Ndufaf4  
Bach2  
Casp8ap2  
Mob3b  
Gm12369  
U7  
Gm12397  
Gm12397  
Kif24  
Tpm2  
Creb3  
Glipr2  
Gne  
AL772376.2  
Mcart1  
5830415F09Rik  
5830415F09Rik  
Nr4a3  
Stx17  
Invs  
Amd-ps4  
Gm12466  
Txn1  
Gm12579  
AI314180  
E130308A19Rik  
Tnfsf15  
Gm11229  
Gm11256  
Gm12913  
Gm11411  
Nfib  
Ttc39b  
U6  
Dennd4c  
Gm12646  
Gm12597  
Ifna13  
4930553M12Rik  
Gm12639  
Gm17636  
BC042782  
Cyp2j13  
Gm12676  
Gm12676  
Gm12852  
Gm12681  
Slc35d1  
Acot11  
Ssbp3  
Gm12786  
Gm12743  
Zfyve9  
Tal1  
Lrrc41  
Mast2  
Ptch2  
Rnf220  
Ptpf  
Ybx1  
Edn2  
Sf3a3  
Gnl2  
Zc3h12a  
Rnf19b  
Lck  
Tinagl1  
Serinc2  
Ythdf2  
Gm13033  
Wdtdc1  
Gm12974  
Slc30a2  
Syf2  
Id3  
Tcea3  
Zfp46  
6030445D17Rik  
Gm13003  
Hspg2  
Alpl  
Ece1  
Eif4g3  
Kif17  
Kif17  
D4Ertd22e  
Ddi2  
4930455G09Rik  
Gm10565  
Gm13062  
Prdm2  
U1  
Dhrs3  
Gm13229  
Gm13207  
Gm13201  
Gm13203  
Gm17029  
Clstn1

Bat2d  
Atp1b1  
lqwd1  
AK008044  
Brp44  
BC056189  
C030014K22Rik  
Uck2  
Fcgr3  
Fcgr3  
Fcgr3  
1700009P17Rik  
Pcp4l1  
Pcp4l1  
Nr1i3  
Nr1i3  
Fcer1g  
Ndufs2  
Adamts4  
Adamts4  
B4galt3  
Ppox  
Usp21  
Usp21  
Dedd  
Dedd  
Pfdn2  
Dedd  
Dedd  
Pfdn2  
Dedd  
Dedd  
Pfdn2  
Nit1  
Nit1  
Pfdn2  
Arhgap30  
mFLJ00267  
Usf1  
Usf1  
Usf1  
Usf1  
AK085275  
F11r  
AK085275  
F11r  
Refbp2  
Vangl2  
Wdr42a  
Wdr42a  
Wdr42a  
Wdr42a  
Wdr42a  
Wdr42a  
Igsf8  
Atp1a2  
Atp1a2  
Igsf8  
AK017125  
Vsig8  
Vsig8  
Cadm3  
Cadm3  
Cadm3  
Rgs7  
Cep170  
Sdccag8  
Sdccag8  
Sdccag8  
Sdccag8  
Zfp238  
Zfp238  
Zfp238  
AK082514  
Zfp238  
Zfp238  
Zfp238  
AK082514  
Adss  
Adss  
EG545391  
EG545391  
Efcab2  
Ahctf1  
Itpkb  
H3f3a  
H3f3b  
Lefty2  
Pycr2  
Pycr2  
Tmem63a  
Tmem63a  
Cnih3  
Lbr  
Enah  
Enah  
lars2  
lars2  
lars2  
Bpnt1  
lars2  
lars2  
lars2  
Bpnt1  
lars2  
lars2  
Bpnt1  
Eprs  
Eprs  
Eprs  
Eprs  
Tgfb2  
Tgfb2  
Rrp15  
AK020767  
Ptpn14  
Ptpn14  
Ptpn14  
Ptpn14  
Ptpn14  
Ptpn14  
Ptpn14  
Prox1  
Prox1  
AK142161  
Prox1  
Prox1  
AK142161  
Prox1  
Prox1  
AK142161  
Prox1  
Prox1  
AK142161  
Tatdn3  
Tatdn3  
Nsl1  
Nsl1  
Atf3  
Atf3  
AK021325  
Ppp2r5a  
Ppp2r5a  
Lpgat1  
Lpgat1  
Lpgat1  
Rcor3

Gpr157  
Rere  
Gm16079  
Espn  
Arhgef16  
Ski  
Ski  
5830444B04Rik  
Dvl1  
1700015F17Rik  
Gm15459  
Gm9758  
Pmpcb  
Dnajc2  
5031425E22Rik  
Srpk2  
Gm9836  
Accn3  
Smarcd3  
Nub1  
1500035N22Rik  
Gm5551  
Rnf32  
Ppm1g  
AC114613.1  
Gm15613  
Whsc1  
2310079F23Rik  
Cno  
Cyt11  
4930421P07Rik  
Gm5292  
Prom1  
Med28  
Gm19031  
Ppargc1a  
Sel1l3  
Gm15975  
Tbc1d1  
Tbc1d1  
Tbc1d1  
Klhl5  
1110003E01Rik  
Slc30a9  
Atp8a1  
Gm15477  
Lrrc66  
Lrrc66  
1700094C10Rik  
Usp46  
Gm2199  
Ugt2b5  
Ugt2b38  
Mob1b  
Dck  
7SK  
Cxcl1  
Sowahb  
2010109A12Rik  
Kat2b-ps  
A930011G23Rik  
Tmem150c  
Gbp11  
Gm16834  
Lrrc8b  
Tgfbr3  
Gm9727  
Pde6b  
Myo18b  
Tmem211  
Oasl2  
Pxn  
Hrk  
AC111115.1  
Sdsl  
Ddx54  
Oas3  
Oas1b  
Pptc7  
P2rx4  
Kdm2b  
U2  
Vps37b  
Scarb1  
Ubc  
Tmem132c  
Abhd11  
Bcl7b  
Rhbdd2  
Tmem120a  
Srcrb4d  
Rasa4  
Emid2  
Plod3  
Ephb4  
Zkscan1  
Heatr2  
Adap1  
Iqce  
Foxk1  
Gm15708  
Gm15708  
Bud31  
Usp12  
Pan3  
n-R5s179  
Usp11  
Stard13  
Slc25a13  
Col28a1  
Nxph1  
Gm15529  
Capza2  
Gm16854  
SNORA17  
Fscn3  
2210408F21Rik  
B230378P21Rik  
Gm13860  
Tmem140  
Slc13a4  
AC157101.1  
Tbxas1  
U6  
Slc37a3  
Rab19  
Mrps33  
Clcn1  
U6  
Cul1  
Ezh2  
2410003K15Rik  
AC158667.1  
Mpp6  
Gm15051  
Jazf1  
Gm15527  
Vmn1r6  
Lancl2  
Gng12  
Igkv1-135  
Igkv2-112  
Igkv10-95  
Gm11065  
Kdm3a  
Kdm3a  
Usp39  
Mat2a  
Sema4f

|               |               |
|---------------|---------------|
| Rcor3         | Atp6v1b1      |
| AK142593      | Gm5138        |
| Rcor3         | Kbtbd12       |
| Rcor3         | Txnrd3        |
| AK142593      | lqsec1        |
| Hhat          | lqsec1        |
| Hhat          | 4930471M09Rik |
| AK006895      | Slc6a6        |
| AK145301      | Prickle2      |
| Irf6          | Frmd4b        |
| Irf6          | Frmd4b        |
| Irf6          | Foxp1         |
| A130010J15Rik | Foxp1         |
| A130010J15Rik | Foxp1         |
| Crry          | Gm6565        |
| Crry          | Ppp4r2        |
| Crry          | Crbn          |
| Crry          | ltpr1         |
| Akap12        | Gm16433       |
| Pcmt1         | n-R5s165      |
| Pcmt1         | Il17re        |
| Pcmt1         | Irak2         |
| AK030763      | AC147047.1    |
| Lats1         | Rassf4        |
| Lats1         | Cxcl12        |
| BC013529      | Zfp239        |
| BC013529      | Adipor2       |
| BC013529      | Kdm5a         |
| AK165776      | Cecr6         |
| Ppil4         | Gm15856       |
| Ppil4         | Usp18         |
| Ust           | Rimklb        |
| Sash1         | Lpcat3        |
| SASH1         | Atn1          |
| Samd5         | Chd4          |
| AK139890      | Tapbp1        |
| Utrn          | Cd9           |
| Utrn          | Gm16303       |
| Utrn          | U6            |
| AK045519      | Gm4968        |
| 4930519B02Rik | 7SK           |
| Ltv1          | Gm10069       |
| Pex3          | Clec2h        |
| Pex3          | Klr1b1f       |
| Pex3          | Gm15854       |
| Deadc1        | Magohb        |
| Hivep2        | Magohb        |
| Hivep2        | Styk1         |
| Hivep2        | Bcl2l14       |
| Hivep2        | Crebl2        |
| Hivep2        | Art4          |
| Hivep2        | Pyroxd1       |
| Hivep2        | Bcat1         |
| Hivep2        | Rps25-ps1     |
| 3110003A17Rik | Tuba3b        |
| 3110003A17Rik | Stk38l        |
| Reps1         | Tmtc1         |
| AK041760      | 4833442J19Rik |
| 5730409E15Rik | U1            |
| Nhsl1         | Ptprh         |
| 5730409E15Rik | Hspbp1        |
| Nhsl1         | U2af2         |
| Nhsl1         | U6            |
| AK043723      | Zfp773        |
| Pde7b         | Clcn4-2       |
| Pde7b         | Sult2a5       |
| Ahi1          | Obox3         |
| Ahi-1         | Meis3         |
| Ahi-1         | Ccdc9         |
| AK041716      | Bbc3          |
| Sgk           | Qpctl         |
| Sgk           | Ppp1r37       |
| Sgk           | Pvrl2         |
| Sgk           | Ceacam16      |
| Sgk           | B9d2          |
| Sgk           | Map3k10       |
| AK053193      | Fbxo27        |
| Raet1e        | Rinl          |
| Raet1a        | Lgals4        |
| Raet1e        | Actn4         |
| Raet1c        | Gm17440       |
| Eya4          | Hspb6         |
| Eya4          | Hamp          |
| Moxd1         | Gm5058        |
| Epb4.1l2      | AC173478.1    |
| L3mbtl3       | Gm12780       |
| L3mbtl3       | Slc7a9        |
| L3mbtl3       | Nudt19        |
| L3mbtl3       | U6            |
| L3mbtl3       | Gm9244        |
| Ptprk         | Gm10351       |
| Ptprk         | Shank1        |
| Ptprk         | Nr1h2         |
| Ptprk         | Pnkp          |
| Ptprk         | Prrg2         |
| Ncoa7         | Flt3l         |
| Ncoa7         | Bcat2         |
| 2700019D07Rik | Bcat2         |
| 2700019D07Rik | Gm16047       |
| 2700019D07Rik | Tsg101        |
| Hs3st5        | Csrp3         |
| Marcks        | E2f8          |
| AK017779      | Nav2          |
| AK040320      | Dbx1          |
| Fyn           | U6            |
| Fyn           | Igf1r         |
| AK164126      | Gm10294       |
| Sez4          | Klhl25        |
| Rev3l         | Mir7-2        |
| AI317395      | Plin1         |
| Bxdc1         | Pex11a        |
| Bxdc1         | Cib1          |
| Gtf3c6        | Gm15880       |
| Gtf3c6        | Zfp592        |
| Amd2          | Homer2        |
| Gpr6          | 1700026D08Rik |
| Foxo3a        | Dlg2          |
| Foxo3a        | Gm16053       |
| Foxo3a        | AC149605.1    |
| Fkhr2         | Aqp11         |
| Foxo3a        | Pak1          |
| Foxo3a        | B3gnt6        |
| Fkhr2         | Uvrag         |
| AK035573      | Uvrag         |
| Sec63         | Slco2b1       |
| AK122525      | Mrpl48        |
| Cd24a         | Art2a-ps      |
| AK158018      | Art2b         |
| AK158018      | Il18bp        |
| Prdm1         | Trim21        |
| Prdm1         | Trim34a       |
| Prdm1         | Fxc1          |
| Prep          | Olfr497       |
| Grik2         | Olfr512       |
| Grik2         | Gm9105        |
| Grik2         | Nrip3         |
| Grik2         | Gm10087       |
| Grik2         | Mrv1          |
| Grik2         | Mical2        |
| Slc35f1       | Mical2        |
| BC062185      | Parva         |
| Mcm9          | AC103388.1    |
| Asf1a         | Insc          |
| Man1a         | SNORA17       |
| Man1a         | Sox6          |
| Man1a         | U6            |
| Man1a         | Acm5          |
| AK138755      | Gm15774       |
| D630037F22Rik | Gm14389       |

Sh3md4  
Sh3md4  
P4ha1  
Cbara1  
Cbara1  
Cbara1  
Cbara1  
Ddit4  
Ddit4  
Ddit4  
D10Ertd641e  
Ascc1  
Ascc1  
Ascc1  
Ascc1  
Pcbd1  
Sgpl1  
Sgpl1  
Sgpl1  
Sgpl1  
Nodal  
AK085995  
Lrrc20  
AK006239  
Sar1a  
Tysnd1  
Col13a1  
Col13a1  
Col13a1  
Ddx21  
Ccar1  
Ccar1  
Ccar1  
Hnrph3  
Hnrph3  
AK156477  
3110049J23Rik  
AK018967  
Herc4  
Herc4  
Herc4  
Sirt1  
Sirt1  
Ctnna3  
Ctnna3  
Ctnna3  
Lrrtm3  
Lrrtm3  
AK079018  
Reep3  
Reep3  
mKIAA1380  
Nrbf2  
Arid5b  
Arid5b  
Arid5b  
Arid5b  
AK029407  
Zwint  
Zwint  
Zwint  
1110038D17Rik  
1110038D17Rik  
1110038D17Rik  
1110038D17Rik  
1110038D17Rik  
Snrpd3  
Cabin1  
Prmt2  
S100b  
Prmt2  
S100b  
Prmt2  
S100b  
Pcnt  
2610028H24Rik  
A130042E20Rik  
Mcm3ap  
Mcm3ap  
Lss  
Col18a1  
Pttg1ip  
Sumo3  
Sumo3  
Ube2g2  
Pfk1  
Icosl  
Ppap2c  
Ppap2c  
Ppap2c  
Ppap2c  
Shc2  
Gm1157  
Bsg  
Hcn2  
Rnf126  
Fstl3  
FLRG  
Prss1  
Palm  
Palm  
9130017N09Rik  
9130017N09Rik  
9130017N09Rik  
Med16  
Med16  
C030046I01Rik  
Kiss1r  
Arid3a  
Arid3a  
mFLJ00277  
ORF61  
Cnn2  
Abca7  
Abca7  
mFLJ00277  
ORF61  
Cnn2  
Abca7  
Abca7  
Abca7  
Abca7  
Dos  
Dos  
Atp5d  
Midn  
Midn  
Cirbp  
1600002K03Rik  
Efna2  
Cirbp  
1600002K03Rik  
Efna2  
Adamts15  
Adamts15  
6330514A18Rik  
Mex3d  
Mbd3  
Mbd3  
Mbd3  
Btdb2  
Btdb2  
Mknk2  
Mknk2  
Ap3d1  
Dot1l  
Dot1  
Ap3d1  
Dot1l

Tnrc6a  
Arhgap17  
Aqp8  
Spns1  
Mvp  
Qprt  
Fbxl19  
Fus  
Bag3  
Ctbp2  
Mki67  
Ppp2r2d  
Bnip3  
Inpp5a  
1190003J15Rik  
Slc25a22  
Pnpla2  
Krtap5-5  
Mir3105  
Fgf4  
Fgf15  
Ccnd1  
Tpcn2  
Ccl25  
Efnb2  
Tnfsf13b  
3930402G23Rik  
9530052E02Rik  
Mcf2l  
Rasa3  
4932443I19Rik  
Fbxo25  
SNORA70  
Defa-ps17  
Tpte  
Adam5  
Plekha2  
Whsc1l1  
1700024N20Rik  
Snord13  
Fut10  
Leprotl1  
Tmem66  
Tusc3  
Cyp4v3  
Tlr3  
Tlr3  
Cdkn2aip  
Psd3  
Gm15716  
Lzts1  
Lzts1  
Hapl4  
Slc25a42  
B3gnt3  
SNORA50  
Nr3c2  
4933431K23Rik  
U6  
Zfp827  
Elmod2  
Ptger1  
Gpt2  
SNORA17  
N4bp1  
Cyld  
9330175E14Rik  
Arl2bp  
Ccl22  
4930513N10Rik  
U6  
Car7  
Pdp2  
Psmb10  
Gm10073  
Has3  
C630050I24Rik  
Mir140  
4922502B01Rik  
Ap1g1  
Calb2  
Glg1  
Mlkl  
Wdr59  
Osgin1  
Taf1c  
Kcng4  
4632415K11Rik  
Gse1  
Irf8  
Fbxo31  
Jph3  
Slc7a5  
Car5a  
Gm17709  
Zfpm1  
Rab4a  
Gm16983  
Cwf19l2  
Arhgap42  
Mre11a  
Heph1  
BC017612  
1810064F22Rik  
Gm10180  
Glb1l3  
Jam3  
Dcps  
Stt3a  
Vwa5a  
Tmem225  
Zfp202  
1700110K17Rik  
Gramd1b  
Gramd1b  
D230004N17Rik  
Pvrl1  
C030014I23Rik  
C030014I23Rik  
C030014I23Rik  
Atp5l  
Ppp2r1b  
Pou2af1  
Kdelc2  
Tnfaip8l3  
Gldn  
Psm4  
Chrn4  
Pstpip1  
Scamp2  
Nptn  
Gm7589  
AC113291.1  
Pias1  
Smad3  
Megf11  
Spg21  
Spg21  
Zfp609  
Zfp609  
Dapk2  
Tpm1  
Vps13c  
Gcnt3  
Myo1e  
Myo1e  
Myzap  
U6  
Mns1



Dot1  
Dot1l  
Plekhj1  
Plekhj1  
Sf3a2  
Amh  
Lmnb2  
Lmnb2  
Gadd45b  
Lmnb2  
Gadd45b  
Gng7  
Gng7  
Sirt6  
Sirt6  
Ankrd24  
mKIAA1981  
mKIAA1981  
Ankrd24  
Mif1  
Glt8d2  
Hcfc2  
Rfx4  
Rfx4  
Rfx4  
Btbd11  
Bpil2  
Fbxo7  
Fbxo7  
Syn3  
Syn3  
Syn3  
Syn3  
Hsp90b1  
BC030307  
BC030307  
BC030307  
BC030307  
Nt5dc3  
Nt5dc3  
Nt5dc3  
Nt5dc3  
Ascl1  
Ascl1  
Ccdc53  
Ccdc53  
Arl1  
Utp20  
Pctk2  
Pctk2  
mmu-mir-1931  
Lta4h  
Lta4h  
Metap2  
Metap2  
Metap2  
AK029692  
Plxnc1  
AK202794  
Nudt4  
mmu-mir-3058  
Btg1  
Atp2b1  
Atp2b1  
Tmtc3  
Tmtc3  
Alx1  
Tmtc2  
Tmtc2  
8430416H19Rik  
8430416H19Rik  
Pawr  
Pawr  
Tmem19  
Tmem19  
Tmem19  
Tmem19  
Thap2  
Ccdc131  
Lgr5  
Lgr5  
Lgr5  
Ptprb  
Gm239  
Frs2  
Frs2  
Cpsf6  
Cpsf6  
Cpsf6  
Cpm  
Dyrk2  
Cand1  
Cand1  
Grip1  
Grip1  
Grip1  
Grip1  
Helb  
Hmga2  
Hmga2  
Hmga2  
Hmga2  
Msrb3  
Gns  
Gns  
AK081796  
Ppm1h  
Ppm1h  
Ppm1h  
Ppm1h  
Ppm1h  
AI851790  
Tsfm  
Tsfm  
Tsfm  
Mettl1  
Mettl1  
Cyp27b1  
  
Tspan31  
Centg1  
C78409  
D10Ertd610e  
D10Ertd610e  
Dtx3  
Dtx3  
Dtx3  
Deltex3  
AK077682  
Pip4k2c  
Mbd6  
Mbd6  
Ddit3  
Gli1  
Gli1  
Gli1  
Gli1  
Gli1  
Lrp1  
Lrp1  
Lrp1  
Stat6  
Stat6  
Nab2  
Nab2  
BC030440  
BC030440  
Kiaa0286

Mar-09

Rfx7  
U6  
n-R5s86  
Tmod3  
Gsta1  
Myo6  
U6  
Bckdhh  
Me1  
Snx14  
Plscr2  
Cep70  
1600029I14Rik  
Msl2  
7SK  
Cpne4  
Rpl29  
Parp3  
Gm9917  
Dag1  
Qars  
Nckipsd  
Shisa5  
Setd2  
Nbeal2  
Ccdc12  
Ccrl2  
7SK  
Clasp2  
Cnot10  
Gm16142  
Eomes  
7SK  
Higd1a  
Sacm1l  
Esr1  
Esr1  
U1  
Sf3b5  
Gm16234  
Olig3  
Gm6846  
E030030I06Rik  
H60b  
Epb4.1l2  
Zufsp  
Zufsp  
Cep57l1  
Cep57l1  
Scml4  
Gm16546  
Gm10812  
Prdm1  
Hace1  
SNORA25  
Mcm9  
Man1a  
Ccdc109a  
Col13a1  
Hk1  
Tet1  
Mypn  
1700120B22Rik  
Dnajc12  
Ctnna3  
Ccdc6  
Gm4798  
1110038D17Rik  
Slc5a4b  
Adarb1  
Aire  
Icosl  
Pdxk  
Ppap2c  
9130017N09Rik  
Sbno2  
Gadd45b  
Gm3828  
Ncln  
Gna11  
Txnrd1  
Gm6721  
Syn3  
Syn3  
Nr1h4  
Tmcc3  
Tmcc3  
5S\_rRNA  
Eea1  
U6  
Osbp18  
Cnot2  
Gm239  
Grip1  
9230105E05Rik  
Msrb3  
Gns  
Tbk1  
Tbk1  
Ppm1h  
Ppm1h  
Lrig3  
Agap2  
Lrp1  
Stat6  
Erbb3  
Rdh5  
Olfr782  
AC132266.1  
Gm12592  
Lif  
Gm11958  
Ascc2  
Ap1b1  
Kremen1  
SNORA17  
Gm12019  
Bcl11a  
Bcl11a  
Bcl11a  
Gm12107  
Cpeb4  
Stk10  
Gm10462  
Rars  
Rnf145  
Gnb2l1  
Mapk9  
Mgat4b  
Mir804  
Agxt2l2  
Cdkl3  
Ppp2ca  
Gm12225  
Fnip1  
Fnip1  
Tnip1  
Sparc  
Gm12243  
Irgm2  
2210407C18Rik  
Gm12714  
Rasd1  
Pemt  
Rai1  
Tom1l2  
Top3a  
Aldh3a1

|               |               |
|---------------|---------------|
| TIP5          | 2810001G20Rik |
| Baz2a         | Zkscan6       |
| Baz2a         | 9130409J20Rik |
| Baz2a         | Ccdc42        |
| Baz2a         | U6            |
| Rbms2         | 2310047M10Rik |
| Rbms2         | Chd3          |
| Gls2          | Chd3          |
| Rbms2         | Kdm6b         |
| Rbms2         | Plscr3        |
| Gls2          | Cldn7         |
| Gls2          | Xaf1          |
| Rbms2         | Trpv3         |
| Rbms2         | Aspa          |
| Gls2          | Olfr404-ps1   |
| Gls2          | Mnt           |
| Myl6          | Slc6a4        |
| Myl6          | Ssh2          |
| Myl6b         | Spag5         |
| AK040027      | Gm11201       |
| Mbc2          | Rab11fip4     |
| Mbc2          | 1110002N22Rik |
| Zc3h10        | 4930507D10Rik |
| Rpl41         | Spaca3        |
| Rpl41         | Gm11426       |
| Zc3h10        | Slfm2         |
| Rpl41         | RP23-381B19.7 |
| Rpl41         | Synrg         |
| Zc3h10        | Gm11437       |
| Rpl41         | Bcas3         |
| Rpl41         | Gm11477       |
| Pa2g4         | Med13         |
| Zc3h10        | 5S_rRNA       |
| Rpl41         | Cltc          |
| Rpl41         | Cltc          |
| Pa2g4         | Trim37        |
| Erbp3         | Mtmr4         |
| Rps26         | U6atac        |
| Rps26         | 7SK           |
| Ikzf4         | Mmd           |
| Ikzf4         | SNORA17       |
| AK047988      | Tob1          |
| AK206637      | Ankrd40       |
| Rab5b         | Phb           |
| Rab5b         | Mir10a        |
| Rab5b         | Gm11525       |
| Si            | Tbkbp1        |
| Rab5b         | Arhgap23      |
| Rab5b         | Erbp2         |
| Rab5b         | Nr1d1         |
| Cdk2          | Krt20         |
| Cdk2          | 2300003K06Rik |
| Si            | Gm11566       |
| Rab5b         | Krt15         |
| Rab5b         | Cnp           |
| Rab5b         | Rab5c         |
| Cdk2          | Stat3         |
| Cdk2          | Stat3         |
| Si            | Ifi35         |
| Dgka          | Tmem106a      |
| Wibg          | Atxn7l3       |
| Wibg          | Grn           |
| Dgka          | Gm11627       |
| Wibg          | Gjc1          |
| Wibg          | Fam187a       |
| 1110012D08Rik | 4933400C05Rik |
| 1110012D08Rik | Gm11648       |
| Ormdl2        | Nsf           |
| 1110005A23Rik | Nsf           |
| 1110005A23Rik | Gm11672       |
| Patz1         | Gm11707       |
| mazr          | Gm11649       |
| Patz1         | Abca8a        |
| Patz1         | Kcnj2         |
| Patz1         | Cdc42ep4      |
| AK177174      | Cdc42ep4      |
| Pik3ip1       | Gm11692       |
| Pik3ip1       | Nat9          |
| Hgfl          | Mir3968       |
| Slc35e4       | Slc16a5       |
| Tcn2          | Myo15b        |
| Tcn2          | H3f3b         |
| Tcn2          | Gm11744       |
| Tcn2          | Tmc6          |
| Pes1          | Socs3         |
| Gal3st1       | Gm11761       |
| 1700020C11Rik | Aatk          |
| Sec14l2       | Aatk          |
| Lif           | P4hb          |
| Lif           | Lrrc45        |
| Lif           | Gm11774       |
| Lif           | Sectm1b       |
| Zmat5         | Gm11792       |
| Zmat5         | Dnmt3a        |
| Nipsnap1      | Dnajc27       |
| Nefh          | Ncoa1         |
| Ap1b1         | 5S_rRNA       |
| Gas2l1        | AC122860.1    |
| Gas2l1        | Wdr35         |
| Gas2l1        | Osr1          |
| Ewsr1         | 1700034J04Rik |
| Ewsr1         | 2410018L13Rik |
| Ewsr1         | Rsad2         |
| Rhbdd3        | Sntg2         |
| Rhbdd3        | Fam110c       |
| Kremen1       | 2010109K11Rik |
| Znrf3         | Gdap10        |
| Znrf3         | Snx13         |
| Ankrd48       | Agmo          |
| Ankrd36       | Scin          |
| Ankrd36       | Zfp277        |
| Ankrd36       | U6            |
| Polm          | Mbip          |
| Ddx56         | C87198        |
| Ddx56         | Gm17529       |
| Tmed4         | Ctage5        |
| Ogdh          | Psma3         |
| Ogdh          | RP23-113F14.3 |
| Ogdh          | Trmt5         |
| AK009365      | Tmem30b       |
| Purb          | Gm11042       |
| AK009365      | Spnb1         |
| Purb          | Fntb          |
| Tbrg4         | Max           |
| Tbrg4         | Atp6v1d       |
| Upp1          | Gm17194       |
| Upp1          | Zfp361l       |
| Upp1          | C130039O16Rik |
| Upp1          | C130039O16Rik |
| Upp1          | Abcd4         |
| Upp1          | Ltbp2         |
| Figl1         | Dlst          |
| Figl1         | Fam164c       |
| Figl1         | 0610007P14Rik |
| Figl1         | U6            |
| Figl1         | Pomt2         |
| Ddc           | Gm2022        |
| Ddc           | Ston2         |
| Ddc           | 3300002A11Rik |
| Sec61g        | Foxn3         |
| Sec61g        | Foxn3         |
| Egfr          | Gm17043       |
| Egfr          | Clmn          |
| Ppp3r1        | 4831426I19Rik |
| Ppp3r1        | Setd3         |
| Spred-2       | Ccdc85c       |
| Spred2        | Evl           |
| Actr2         | Dio3          |
|               | Ppp2r5c       |

|               |               |
|---------------|---------------|
| Actr2         | Cdc42bpb      |
| Slc1a4        | 1200009I06Rik |
| Aftph         | Tnfaip2       |
| Aftph         | Akt1          |
| Aftph         | 4930427A07Rik |
| Otx1          | Ighv6-6       |
| Otx1          | Cdca7l        |
| Ehbp1         | Sp4           |
| Ehbp1         | Sp8           |
| Ehbp1         | Gm17177       |
| Ehbp1         | BC016423      |
| Ehbp1         | Asb13         |
| Ehbp1         | Gm9742        |
| Ehbp1         | Gm17294       |
| Ehbp1         | Ggps1         |
| B3gnt2        | U6            |
| B3gnt2        | Arid4b        |
| B3gnt2        | U1            |
| 4930430E16Rik | Olfr1361      |
| 4930430E16Rik | Olfr1359      |
| 4930430E16Rik | Hist1h2bl     |
| AK149094      | Gm11274       |
| Usp34         | Hist1h4n      |
| Pex13         | Zfp184        |
| Ccdc139       | Gm11291       |
| Ccdc139       | Gm11292       |
| Ccdc139       | Hist1h4d      |
| Pex13         | Hfe           |
| Ccdc139       | Lrrc16a       |
| Ccdc139       | Pr13d3        |
| Ccdc139       | 2610307P16Rik |
| Pex13         | Gm11370       |
| Ccdc139       | Hus1b         |
| Ccdc139       | Gm5447        |
| Ccdc139       | Foxq1         |
| Pap0lg        | Serpinb9      |
| Pap0lg        | Serpinb6a     |
| Bcl11a        | Psmg4         |
| Bcl11a        | Cdyl          |
| Bcl11a        | Nedd9         |
| Bcl11a        | Ccdc90a       |
| Bcl11a        | C030044B11Rik |
| Bcl11a        | 1110007C09Rik |
| Bcl11a        | Susd3         |
| Bcl11a        | Nxn12         |
| Bcl11a        | S1pr3         |
| Bcl11a        | Cks2          |
| Bcl11a        | Gadd45g       |
| Bcl11a        | Syk           |
| Bcl11a        | Sfxn1         |
| Bcl11a        | Gm6344        |
| Bcl11a        | Fgfr4         |
| Bcl11a        | Rgs14         |
| Bcl11a        | Golm1         |
| Bcl11a        | Fbp1          |
| Bcl11a        | Zfp748        |
| Bcl11a        | Irx4          |
| Bcl11a        | Slc12a7       |
| Bcl11a        | Gm10126       |
| Bcl11a        | Pdcd6         |
| Bcl11a        | Erap1         |
| Smek2         | Mctp1         |
| Smek2         | Rasa1         |
| Smek2         | U6            |
| A430106J12Rik | Jmy           |
| Ccdc88a       | Lhfp12        |
| Rps27a        | F2r11         |
| RP23-92B18.7  | AC137692.1    |
| Rtn4          | Gcnt4         |
| Rtn4          | Tnpo1         |
| C230094A16Rik | Gm807         |
| Stc2          | Ptcd2         |
| Stc2          | Naip3         |
| Cpeb4         | AC165159.1    |
| Cpeb4         | Mast4         |
| Cpeb4         | Adamts6       |
| Cpeb4         | Adamts6       |
| Cpeb4         | Gm2822        |
| Cpeb4         | Plk2          |
| Ubt2          | Gm6320        |
| Ubt2          | 4833420G17Rik |
| 1700007I06Rik | Gm3460        |
| Stk10         | Gm6356        |
| mKIAA4026     | Pxk           |
| Fgf18         | Oit1          |
| Npm1          | Olfr721-ps1   |
| Npm1          | Nr1d2         |
| Npm1          | Nkiras1       |
| Fgf18         | Gm2244        |
| Npm1          | SNORA70       |
| Npm1          | Comtd1        |
| Npm1          | Zmiz1         |
| Ranbp17       | SNORA71       |
| Ranbp17       | Arf4          |
| Kcnip1        | Sh3bp5        |
| Kcnip1        | 3425401B19Rik |
| Kcnip1        | Anxa8         |
| Kcnip1        | SNORA17       |
| Od2           | 9230112D13Rik |
| ten-m2        | n-R5s46       |
| Gabrb2        | Mat1a         |
| Gabrb2        | Gm2959        |
| mmu-mir-146a  | Ear-ps12      |
| Ccnjl         | Gm17184       |
| Ccnjl         | Ptger2        |
| Ttc1          | Gm7206        |
| Rnf145        | Mapk1ip1l     |
| Rnf145        | Peli2         |
| Rnf145        | Olfr741       |
| Rnf145        | Olfr1507      |
| Lsm11         | Abhd4         |
| Gnb2l1        | Cebpe         |
| Trim41        | Psme1         |
| Trim7         | Psme2         |
| Trim7         | Ltb4r1        |
| Trim41        | Sdr39u1       |
| Trim7         | Gzmb          |
| Trim7         | Parp4         |
| AK029860      | Spata13       |
| AK029860      | Wdfy2         |
| Btnl9         | Fdft1         |
| Zfp62         | Xkr6          |
| Zfp62         | Msra          |
| Zfp62         | Hmbox1        |
| Zfp62         | Pbk           |
| Zfp62         | Gm10233       |
| Btnl9         | Rhobtb2       |
| Zfp62         | Bmp1          |
| Zfp62         | Dok2          |
| Zfp62         | Fndc3a        |
| Zfp62         | Lrch1         |
| Zfp62         | Slc25a30      |
| Flt4          | Nufip1        |
| Cnot6         | Nufip1        |
| Cnot6         | Tsc22d1       |
| Gfpt2         | AC124745.1    |
| Mapk9         | Elf1          |
| Jnk2          | SNORA17       |
| Mapk9         | Mzt1          |
| Mapk9         | Dis3          |
| Sqstm1        | Klf5          |
| Mgat4b        | U2            |
| AK157916      | Commd6        |
| Sqstm1        | Lmo7          |
| Mgat4b        | Spry2         |
| AK157916      | 1110020G09Rik |
| Sqstm1        | Mtmr12        |
| Mgat4b        | Pdzd2         |
| AK157916      | Cdh6          |

Mgat4b  
AK157916  
Canx  
Canx  
Hnrph1  
Hnrph1  
Hnrph1  
mmu-mir-804  
Rufy1  
9630041N07Rik  
BC021919  
Grm6  
Grm6  
Grm6  
Hnrpab  
Hnrpab  
Nola2  
Rmnd5b  
D930048N14Rik  
Rmnd5b  
D930048N14Rik  
0610009B22Rik  
Phf15  
Phf15  
Phf15  
Cdkn2aipnl  
Ube2b  
Cdkl3  
Cdkl3  
Cdkl3  
Cdkl3  
Cdkl3  
Cdkl3  
Skp1a  
AK202663  
Vdac1  
Fstl4  
Hspa4  
Hspa4  
AK038627  
Zcchc10  
Zcchc10  
Irf1  
Irf1  
Irf1  
Tnip1  
Tnip1  
Tnip1  
Tnip1  
Atox1  
G3BP  
G3bp1  
AK007998  
Sap30l  
Cnot8  
Cnot8  
Cnot8  
Cnot8  
Zfp692  
Zfp692  
Zfp672  
Zfp672  
Zfp672  
Sh3bp5l  
Sh3bp5l  
Sh3bp5l  
Sh3bp5l  
Sh3bp5l  
Sh3bp5l  
Zfp672  
Zfp672  
Zfp672  
Sh3bp5l  
Sh3bp5l  
Sh3bp5l  
Sh3bp5l  
Sh3bp5l  
Sh3bp5l  
1810065E05Rik  
Zfp39  
Butr1  
Butr1  
Rnf187  
Hist3h2ba  
Hist3h2a  
Trim17  
Trim17  
Rnf187  
Hist3h2bb  
Hist3h2a  
Trim17  
Trim17  
Wnt3a  
Wnt9a  
Wnt3a  
Wnt9a  
Wnt3a  
Wnt9a  
Wnt3a  
Wnt9a  
1110031B06Rik  
Jmjd4  
Jmjd4  
1110031B06Rik  
Jmjd4  
Jmjd4  
BC050078  
Zkscan17  
Zfp496  
Zkscan17  
Zkscan17  
BC099591  
AK163429  
AK030920  
Flcn  
Flcn  
AK144909  
Pemt  
Pemt  
Rai1  
Lgl1  
Lgl1  
Top3a  
Top3a  
Top3a  
Smcr8  
Shmt1  
Shmt1  
Dhrs7b  
Dhrs7b  
Tmem11  
AK140192  
Aldh3a2  
Mapk7  
Mapk7  
Mapk7

Cdh18  
5S\_rRNA  
Gm10384  
Gm10384  
Oxr1  
U2  
Mtbp  
Sqle  
Myc  
Pvt1  
Fam49b  
Adcy8  
Eif2c2  
Slc45a4  
Slc45a4  
4930572J05Rik  
Ly6a  
1110038F14Rik  
Apol11a  
Apol11b  
Apol7e  
U6  
Kctd17  
Lgals2  
Cbx6  
SNORA17  
Fam83f  
Gm17025  
Gm8444  
1500032L24Rik  
Cyp2d26  
Gm17401  
Cpne8  
4933438A12Rik  
Lrrk2  
Adamts20  
Pus7l  
Twf1  
AC113178.1  
Slc38a2  
SNORA17  
4930578M01Rik  
Troap  
Lima1  
RP24-73K9.3  
Cela1  
Galnt6  
Acvr1l  
Krt8  
Krt8  
Krt18  
Atf7  
Hoxc6  
Cbx5  
Pde1b  
Nudt16l1  
Abat  
Ciita  
Ciita  
Socs1  
Gm11172  
Gm4262  
Cpped1  
Bfar  
Mapk1  
Rimbp3  
Trmt2a  
Tbx1  
Abcc5  
Vps8  
Gm17439  
Igf2bp2  
Tra2b  
Snord2  
Il1rap  
Lsg1  
Gm15742  
Apod  
Osta  
Muc4  
Kalrn  
Hspbap1  
Parp14  
Gm10237  
Parp9  
U6  
Cd86  
Cd86  
Hgd  
Nr1i2  
Cox17  
Cox17  
Arhgap31  
Gm15803  
4932412D23Rik  
Gramd1c  
Slc35a5  
U6  
Cd47  
Cblb  
Senp7  
Tfg  
Gpr128  
2610528E23Rik  
Gpr15  
Pros1  
Cggbp1  
AC163694.1  
Robo1  
Usp25  
Rwdd2b  
Bach1  
2310061N02Rik  
Krtap20-2  
Donson  
Cryz1l  
Mir802  
Cbr1  
2310043M15Rik  
Ttc3  
Dyrk1a  
Lca5l  
Pcp4  
Prdm15  
5730437N04Rik  
Ppp1r2-ps6  
Dynlt1a  
Tmem181b-ps  
Unc93a  
U6  
Tcte2  
Gm7358  
Prdm9  
Prdm9  
Zfp97  
Vmn2r90  
Vmn2r-ps118  
Fpr-rs3  
Zfp160  
Zfp943  
Zfp758  
Vmn2r-ps131  
Zscan10  
1520401A03Rik  
E4f1  
Hagl  
Axin1  
Bak1  
Hmga1

|                    |               |
|--------------------|---------------|
| Mapk7              | E230001N04Rik |
| BC058096           | Brpf3         |
| B9d1               | Srsf3         |
| Ncor1              | Srsf3         |
| Ncor1              | Ftsjd2        |
| Ncor1              | Dnahc8        |
| Ncor1              | Slc37a1       |
| Ncor1              | Gm17276       |
| Ncor1              | Ephx3         |
| Ncor1              | Brd4          |
| Ncor1              | Cyp4f16       |
| Ncor1              | Cyp4f16       |
| Ncor1              | Cyp4f16       |
| Ncor1              | Cyp4f40       |
| Pigl               | Gm4461        |
| Prr6               | Rps28         |
| Ubb                | Tapbp         |
| AK010427           | Rxb           |
| AK157519           | Psmb9         |
| BC046404           | Psmb8         |
| BC046404           | Tap2          |
| BC046404           | Btnl5         |
| AK005754           | Btnl6         |
| BC046404           | Btnl7         |
| BC046404           | Btnl7         |
| BC046404           | Notch4        |
| BC025076           | Gm11131       |
| BC025076           | Cchr1         |
| BC025076           | Gm20443       |
| BC046404           | H2-T24        |
| BC046404           | H2-T23        |
| BC025076           | H2-BI         |
| BC025076           | Gm6659        |
| BC025076           | H2-T3         |
| Cdrt4              | Gm8835        |
| Cdrt4              | Trim26        |
| Pmp22              | Trim31        |
| Pmp22              | Pgk2          |
| Hs3st3b1           | Cd2ap         |
| Hs3st3b1           | Tdrd6         |
| Hs3st3b1           | Enpp4         |
| Elac2              | Aars2         |
| AU040829           | Hsp90ab1      |
| OTTMUSP00000006088 | Mrpl14        |
| AU040829           | Gm16862       |
| OTTMUSP00000006088 | Ppp2r5d       |
| Zkscan6            | Guca1a        |
| Gm879              | 1700001C19Rik |
| Ntn1               | Ccnd3         |
| Ntn1               | Sult1c2       |
| Arhgef15           | Pot1b         |
| Arhgef15           | Hdgfrp2       |
| Arhgef15           | Vav1          |
| 1500010J02Rik      | U1            |
| 1500010J02Rik      | 4930405022Rik |
| Aurkb              | Man2a1        |
| 1500010J02Rik      | 1110012J17Rik |
| 1500010J02Rik      | RP23-349B16.3 |
| Aurkb              | Ypel5         |
| 1500010J02Rik      | Lclat1        |
| 1500010J02Rik      | Birc6         |
| Aurkb              | Gm17538       |
| Aurkb              | Prkd3         |
| 2310047M10Rik      | Atl2          |
| Aurkb              | U6            |
| 2310047M10Rik      | Prkce         |
| Aurkb              | Mcf2          |
| 2310047M10Rik      | 1700011E24Rik |
| Aurkb              | Calm2         |
| 2310047M10Rik      | Msh2          |
| Aurkb              | U6            |
| 2310047M10Rik      | Gm6741        |
| 2310047M10Rik      | U6            |
| Tmem107            | 7SK           |
| Tmem107            | Usp14         |
| Tmem107            | Ss18          |
| Tmem107            | Dsg1a         |
| Tmem107            | Rit2          |
| Tmem107            | Sap130        |
| Vamp2              | Epb4.1l4a     |
| Tmem107            | Srp19         |
| Tmem107            | n-R5s24       |
| Vamp2              | Ctnna1        |
| Tmem107            | Ankhd1        |
| Tmem107            | Taf7          |
| Vamp2              | AC134576.1    |
| Tmem107            | Arhgap26      |
| Tmem107            | Gm15333       |
| Vamp2              | Preli2        |
| Vamp2              | Sh3rf2        |
| Per1               | 4933407I08Rik |
| Per1               | Spinkl        |
| Per1               | Sema6a        |
| Per1               | Dmxl1         |
| Per1               | Tnfaip8       |
| Per1               | Hsd17b4       |
| Per1               | Zfp608        |
| Per1               | Gramd3        |
| Hes7               | BC023105      |
| Aloxe3             | AC116595.1    |
| Hes7               | Ppargc1b      |
| Aloxe3             | Ppargc1b      |
| Hes7               | Atp8b1        |
| Aloxe3             | U6            |
| Hes7               | Lman1         |
| Aloxe3             | Gm15958       |
| Cyb5d1             | 7SK           |
| Tmem88             | Mro           |
| Jmjd3              | Myo5b         |
| Jmjd3              | Atp5a1        |
| Cyb5d1             | Cyb5          |
| Tmem88             | Cyb5          |
| Jmjd3              | Ndufs8        |
| Jmjd3              | Unc93b1       |
| Jmjd3              | BC021614      |
| Cyb5d1             | Pitpnm1       |
| Tmem88             | Ssh3          |
| Jmjd3              | Syt12         |
| Jmjd3              | Yif1a         |
| Jmjd3              | Sf3b2         |
| Cyb5d1             | Snx32         |
| Tmem88             | Map3k11       |
| Jmjd3              | Gpha2         |
| Jmjd3              | Ccdc88b       |
| Jmjd3              | Ms4a12        |
| Cyb5d1             | Olf1420       |
| Tmem88             | Osbp          |
| Jmjd3              | Dtx4          |
| Jmjd3              | Fam111a       |
| Jmjd3              | Gm8250        |
| Cyb5d1             | Pip5k1b       |
| Tmem88             | Gm10053       |
| Jmjd3              | Cd274         |
| Jmjd3              | Il33          |
| Jmjd3              | U1            |
| Tmem88             | Sgms1         |
| Jmjd3              | Pten          |
| Jmjd3              | Gm7237        |
| Jmjd3              | Gm7237        |
| Tmem88             | AC157912.1    |
| Jmjd3              | Ifit1         |
| Jmjd3              | Hectd2        |
| Jmjd3              | Cpeb3         |
| Jmjd3              | Cpeb3         |
| Jmjd3              | Cyp2c67       |
| Jmjd3              | Pdlim1        |
| Dnahc2             | Aldh18a1      |
| Jmjd3              | Entpd1        |
| Jmjd3              | Lcor          |

Jmjd3  
Dnahc2  
Jmjd3  
Dnahc2  
Dnahc2  
Dnahc2  
Efnb3  
Wdr79  
Wdr79  
p53  
Trp53  
Trp53  
Wdr79  
Atp1b2  
Atp1b2  
Sat2  
Sat2  
Sat2  
Atp1b2  
Sat2  
Sat2  
Sat2  
Shbg  
Fxr2  
Mpdu1  
Supl15h  
Cd68  
mmu-mir-1934  
Polr2a  
Amac1  
Zbtb4  
Zbtb4  
Zbtb4  
Polr2a  
Amac1  
Zbtb4  
Zbtb4  
Zbtb4  
Zbtb4  
Polr2a  
Amac1  
Zbtb4  
Zbtb4  
Zbtb4  
Polr2a  
Amac1  
Zbtb4  
Zbtb4  
Zbtb4  
Polr2a  
Amac1  
Zbtb4  
Zbtb4  
Zbtb4  
Chrn1  
Tmem102  
Chrn1  
Fgf11  
Tmem102  
Tmem102  
Tnk1  
Tnk1  
Kctd11  
Centb1  
Centb1  
2810408A11Rik  
0610025P10Rik  
Gps2  
Gps2  
2810408A11Rik  
Eif5a  
Eif5a  
Eif5a  
Ybx2  
2810408A11Rik  
Eif5a  
Eif5a  
Eif5a  
Ybx2  
2810408A11Rik  
Eif5a  
Eif5a  
Eif5a  
Ybx2  
Eif5a  
Eif5a  
Eif5a  
Ybx2  
Msy2  
GLUT4  
Slc2a4  
Slc2a4  
Cldn7  
Rai12  
Rai12  
Rai12  
Dullard  
Gabarap  
Phf23  
Phf23  
Phf23  
Dvl2  
Dvl2  
Dvl2  
Rai12  
Rai12  
Rai12  
Gabarap  
Phf23  
Phf23  
Phf23  
Dvl2  
Dvl2  
Dvl2  
mmu-mir-324  
Rai12  
Rai12  
Rai12  
Phf23  
Phf23  
Phf23  
Dvl2  
Dvl2  
Dvl2  
mmu-mir-324  
Acadvl  
Dlg4  
Slc16a13  
Bcl6b  
mmu-mir-497  
mmu-mir-195  
D11Bwg0434e  
D11Bwg0434e  
0610010K14Rik  
D11Bwg0434e  
Alox12  
Alox12  
D11Bwg0434e  
D11Bwg0434e  
0610010K14Rik

Pgam1  
Avpi1  
SNORA17  
Abcc2  
Dnmbp  
Erlin1  
Scd3  
Sufu  
Trim8  
Cnm2  
Col17a1  
Acsl5  
Tcf7l2  
Casp7  
Nhlrc2  
B230217O12Rik  
Trub1  
1700011F14Rik  
Pnliprp1  
Gm6020  
Gripap1  
Gata1  
Gm14502  
Gm14458  
Gm5755  
Gm6923  
Gm4732  
Dock11  
AL451076.1  
6030498E09Rik  
Xiap  
9530027J09Rik  
7SK  
Gm14612  
Gpc4  
Gm7851  
U6  
Gm14594  
Gm14625  
Nsdhl  
Mageb18  
Gm14780  
Fam123b  
1700010D01Rik  
Gm14933  
Gm14808  
Gm14876  
Gm14886  
Gm6429  
Gm14940  
Vmn2r121  
Gm14983  
Prps1  
Trpc5  
Amot  
AL808014.1  
Gm15101  
Itih5l-ps  
Shroom2  
Phex  
Gm6568  
Sh3kbp1  
U6  
U6  
Tmsb4x  
Mid1

D11Bwg0434e  
Alox12  
Alox12  
D11Bwg0434e  
D11Bwg0434e  
0610010K14Rik  
D11Bwg0434e  
Alox12  
Alox12  
Alox12e  
Tm4sf5  
C730027E14Rik  
Psm6  
MINK  
Mink1  
MINK  
Mink1  
Slc25a11  
Pfn1  
ENO3  
Eno3  
Eno3  
Slc25a11  
Pfn1  
ENO3  
Eno3  
Eno3  
Pfn1  
Spag7  
Camta2  
mKIAA0909  
Camta2  
Spag7  
Camta2  
mKIAA0909  
Camta2  
Al842396  
Al842396  
Kif1c  
Kif1c  
Camta2  
mKIAA0909  
Camta2  
Al842396  
Al842396  
Kif1c  
Kif1c  
AK039373  
Zfp3  
AK039373  
Zfp3  
Rabep1  
Rabep1  
4933427D14Rik  
mKIAA0753  
4933427D14Rik  
4933427D14Rik  
Med31  
AK043242  
Ube2g1  
Ube2g1  
Ankhzn  
Ankfy1  
1200014J11Rik  
1200014J11Rik  
1200014J11Rik  
Tmem93  
Tax1bp3  
Tax1bp3  
Trpv3  
Garnl4  
mKIAA1039  
Garnl4  
mKIAA1039  
Garnl4  
mKIAA1039  
Pafah1b1  
Pafah1b1  
Pafah1b1  
AK039862  
Pafah1b1  
Pafah1b1  
Pafah1b1  
AK039862  
Pafah1b1  
Pafah1b1  
Pafah1b1  
AK039862  
Smg6  
BC127131  
BC127131  
Hic1  
Hic1  
AK006051  
mmu-mir-212  
mmu-mir-132  
Ovca2  
Dph1  
Rtn4r1  
Ovca2  
Dph1  
Rtn4r1  
Rtn4r1  
Myo1c  
Myo1c  
Myo1c  
Myo1c  
Glod4  
2310047D13Rik  
2310047D13Rik  
Dbil5  
Glod4  
2310047D13Rik  
2310047D13Rik  
Dbil5  
Glod4  
AK198984  
Gemin4  
Gemin4  
Dbil5  
Nxn  
Nxn  
Nxn  
Timm22  
Nxn  
Nxn  
Timm22  
Blmh  
Efcab5  
Ssh2  
mSSH-2L  
Ssh2  
Ssh2  
mSSH-2L  
Ssh2  
Ankrd13b  
Ankrd13b  
RP23-81E16.2-005  
Ankrd13b  
Git1  
Ankrd13b  
Ankrd13b  
RP23-81E16.2-005  
Ankrd13b  
Git1  
Ankrd13b  
RP23-81E16.2-005  
Ankrd13b  
Git1

Trp53i13  
1300007F04Rik  
AK040172  
Trp53i13  
1300007F04Rik  
AK040172  
Taok1  
Taok1  
Nufip2  
Myo18a  
Myo18a  
Myo18a  
Myo18a  
Pipox  
Sez6  
Sez6  
BC128327  
Phf12  
Phf12  
Phf12  
BC128327  
Phf12  
Phf12  
Phf12  
Dhrs13  
Dhrs13  
Flot2  
Flot2  
Eral1  
BC017647  
BC017647  
Eral1  
BC017647  
BC017647  
Eral1  
BC017647  
BC017647  
BC017647  
BC017647  
BC017647  
Traf4  
traf4  
Nek8  
Tlcd1  
Tlcd1  
Tlcd1  
Rab34  
4933404M19Rik  
Nek8  
Rpl23a  
Rab34  
4933404M19Rik  
Nek8  
Rpl23a  
Rab34  
4933404M19Rik  
Nek8  
Rpl23a  
4933404M19Rik  
Supt6h  
Sdf2  
2610507B11Rik  
Supt6h  
Sdf2  
2610507B11Rik  
Supt6h  
2610507B11Rik  
Supt6h  
2610507B11Rik  
Supt6h  
AK161406  
Spag5  
Nlk  
Nlk  
Nlk  
Nlk  
Ksr1  
Ksr1  
Ksr1  
NF1  
Nf1  
NF1  
Nf1  
mmu-mir-193  
mmu-mir-193  
mmu-mir-193  
mmu-mir-193  
mmu-mir-365-2  
Suz12  
Suz12  
Crlf3  
Cytor4  
Atad5  
Atad5  
1110002N22Rik  
1110002N22Rik  
Centa2  
Centa2  
Rhot1  
BC055823  
Rhbd13  
VRHO  
Rhbd13  
VRHO  
Rhbd13  
VRHO  
Psm11  
Psm11  
Psm11  
Tmem98  
Accn1  
Accn1  
Cct6b  
Cc16  
Lig3  
Lig3  
Lig3  
Lig3  
Cct6b  
Cc16  
Lig3  
Lig3  
Lig3  
Lig3  
Nle1  
Unc45b  
Unc45b  
Unc45b  
Slfn2  
AK135766  
AK166453  
Ap2b1  
Ap2b1  
Ap2b1  
Pex12  
Pex12  
Pex12  
Ap2b1  
Ap2b1  
Ap2b1  
Mmp28  
Mmp28  
Taf15  
Taf15  
110001G20Rik  
Heatr6  
Heatr6  
Hnf1b



Hnf1b  
Hnf1b  
Hnf1b  
Ddx52  
Acaca  
OTTMUSG00000000997  
Acaca  
Acaca  
Acaca  
Aatf  
Aatf  
Lhx1  
AK018772  
Aatf  
Aatf  
Lhx1  
AK018772  
Aatf  
Aatf  
Lhx1  
AK018772  
Ggnbp2  
Ggnbp2  
Ggnbp2  
DIF-3  
Myohd1  
Myohd1  
Myohd1  
Ggnbp2  
Ggnbp2  
Ggnbp2  
DIF-3  
Pigw  
Pigw  
Myohd1  
Myohd1  
Myohd1  
RP23-391K14.2-001  
Ggnbp2  
Ggnbp2  
Ggnbp2  
DIF-3  
Pigw  
Pigw  
Myohd1  
Myohd1  
Myohd1  
RP23-391K14.2-001  
Ppm1d  
Ppm1d  
Bcas3  
Bcas3  
Bcas3  
Bcas3  
Bcas3  
Bcas3  
Bcas3  
Bcas3  
AK085522  
AK011568  
Tbx2  
AK085522  
AK011568  
Tbx2  
AK085522  
AK011568  
Tbx2  
AK085522  
AK011568  
Tbx2  
Brip1  
4632419I22Rik  
4632419I22Rik  
4632419I22Rik  
Ints2  
Ints2  
Med13  
Med13  
0610013E23Rik  
0610013E23Rik  
RP23-467J12.2-001  
Rps6kb1  
Rps6kb1  
AK165329  
Tubd1  
Tubd1  
Tubd1  
RP23-467J12.2-001  
Rps6kb1  
Rps6kb1  
AK165329  
Tubd1  
Tubd1  
Tubd1  
Tmem49  
Tmem49  
ni-2  
Ptrh2  
Cltc  
Cltc  
Prr11  
1110001A07Rik  
1110001A07Rik  
1110001A07Rik  
Trim37  
mmu-mir-301a  
Prr11  
1110001A07Rik  
1110001A07Rik  
1110001A07Rik  
Trim37  
mmu-mir-301a  
Prr11  
AK040752  
Trim37  
Ppm1e  
Rad51c  
Tex14

Sep-04  
Sep-04

Mtmr4  
Mtmr4  
Hsf5  
Rnf43  
Rnf43  
Rnf43  
AK043747  
mKIAA0612  
Bzrap1  
Bzrap1  
mKIAA0612  
Olfr462  
Olfr463  
Dynll2  
Dynll2  
Sfrs1  
AK040276  
Vezf1  
AK040276  
Vezf1  
AK040276  
Vezf1  
Cuedc1  
Cuedc1  
Cuedc1  
Cuedc1  
Cuedc1  
Cuedc1  
Cuedc1  
Cuedc1

Cuedc1  
Mrps23  
Mrps23  
Msi2  
Msi2  
Msi2  
AK002838  
Akap1  
Akap1  
Akap1  
Akap1  
Akap1  
Akap1  
Dgke  
AK044435  
AK039819  
Gm525  
Nog  
Nog  
Hlf  
Hlf  
Hlf  
Hlf  
Hlf  
Hlf  
Hlf  
Stxbp4  
Stxbp4  
Stxbp4  
Cox11  
Stxbp4  
Stxbp4  
Stxbp4  
Cox11  
Nme2  
Nme2  
Nme2  
Nme2  
Nme1  
Nme2  
Nme2  
Nme1  
JSAP2  
JSAP2  
Spag9  
Spag9  
JSAP2  
JSAP2  
Spag9  
Spag9  
Spag9  
Tob1  
3300001P08Rik  
3300001P08Rik  
Ankrd40  
Ankrd40  
3300001P08Rik  
3300001P08Rik  
Ankrd40  
Ankrd40  
Cacna1g  
Cacna1g  
Spata20  
Epn3  
Mycbpap  
Mycbpap  
Mycbpap  
Mycbpap  
Lrrc59  
Eme1  
Mrpl27  
Col1a1  
Col1a1  
Col1a1  
Sgca  
Sgca  
Ppp1r9b  
Ppp1r9b  
Sgca  
Sgca  
Ppp1r9b  
Ppp1r9b  
Samd14  
Itga3  
Itga3  
Itga3  
Dlx3  
AK139229  
Tac4  
5730593F17Rik  
Slc35b1  
Phb  
Phb  
AK027957  
Zfp652  
Zfp652  
Phospho1  
Gngt2  
Gngt2  
Zfp652  
Phospho1  
Gngt2  
Gngt2  
B4galnt2  
B4galnt2  
Igf2bp1  
Gip  
Igf2bp1  
Gip  
Igf2bp1  
Gip  
Igf2bp1  
Gip  
Igf2bp1  
Gip  
Igf2bp1  
Gip  
Snf8  
Ube2z  
Ube2z  
Atp5g1  
Atp5g1  
Atp5g1  
Ube2z  
Atp5g1  
Atp5g1  
Atp5g1  
AK078566  
mmu-mir-196a-1  
AK078566  
mmu-mir-196a-1  
AK078566  
Hoxb9  
Hoxb9  
mmu-mir-196a-1  
Hoxb8  
Hoxb8  
Hoxb7  
Hoxb6  
Hoxb8  
Hoxb8  
Hoxb7  
Hoxb6  
Hoxb5  
Hoxb8  
Hoxb8  
Hoxb7



Pcgf2  
Pcgf2  
Psmb3  
Psmb3  
Rpl23  
Rpl23  
Lasp1  
Rpl23  
Rpl23  
Lasp1  
Rpl23  
Rpl23  
Lasp1  
B230217C12Rik  
B230217C12Rik  
B230217C12Rik  
Fbxo47  
Plxdc1  
Arl5c  
Cacnb1  
Cacnb1  
Cacnb1  
Rpl19  
Rpl19  
Cacnb1  
Cacnb1  
Cacnb1  
Rpl19  
Rpl19  
Cacnb1  
Cacnb1  
Cacnb1  
Rpl19  
Rpl19  
Stac2  
Stac2  
Fbxl20  
Fbxl20  
Fbxl20  
Med1  
Med1  
Med1  
Crks  
Crks  
mKIAA0904  
mKIAA0904  
mKIAA0904  
AK047916  
Neurod2  
Ppp1r1b  
Ppp1r1b  
Ppp1r1b  
Stard3  
Perld1  
Erb2  
Perld1  
Erb2  
Perld1  
Erb2  
1810046J19Rik  
Ormdl3  
Thrap4  
Med24  
Med24  
Thrap4  
Thra  
Thra  
Thra  
Thra  
Nr1d1  
4121402D02Rik  
4121402D02Rik  
4121402D02Rik  
4121402D02Rik  
Nr1d1  
4121402D02Rik  
4121402D02Rik  
4121402D02Rik  
4121402D02Rik  
Wipf2  
Wipf2  
Rara  
Rara  
Rara  
Rara  
Rara  
Gjc1  
Top2a  
Top2a  
Top2a  
Top2a  
Igfbp4  
Top2a  
Igfbp4  
Top2a  
Igfbp4  
Smarce1  
Smarce1  
Krt28  
Krt10  
Eif1  
Gast  
Jup  
Fkbp10  
Jup  
Fkbp10  
Jup  
Fkbp10  
Jup  
1110036O03Rik  
Fkbp10  
Cnp  
Cnp  
Cnp  
AK053109  
Dhx58  
D11lgp2  
Gcn5l2  
Gcn5l2  
Gcn5l2  
Rab5c  
Rab5c  
Stat5b  
Stat5a  
Stat5a  
Stat5A  
Stat3  
Stat3  
Stat3  
Ptrf  
Ptrf  
Ptrf  
Hsd17b1  
Coasy  
Coasy  
Mlx  
Mlx  
1300010M03Rik  
Tubg1  
tubg1  
Plekh3  
Plekh3  
Plekh3  
Cntnap1  
Plekh3  
Plekh3  
Ccr10  
Cntnap1



Wnt3  
Wnt3  
Nsf  
AK160502  
Nsf  
Crhr1  
Mapt  
Mapt  
1700081L11Rik  
1700081L11Rik  
1700081L11Rik  
1700081L11Rik  
1700081L11Rik  
1700081L11Rik  
1700081L11Rik  
Cdc27  
Cdc27  
Myl4  
Tlk2  
1700052K11Rik  
Tlk2  
Tlk2  
Mrc2  
Mrc2  
Tanc2  
Tanc2  
Tanc2  
Wdr68  
Wdr68  
AK019365  
Map3k3  
2610019A05Rik  
asp4  
Ftsj3  
Psmc5  
Ftsj3  
Smarcd2  
Smarcd2  
Tcam1  
Ftsj3  
Smarcd2  
Smarcd2  
Tcam1  
Icam2  
Ern1  
ire1 alpha  
Ern1  
Tex2  
Tex2  
Tex2  
Tex2  
Polg2  
MtPolB  
MtPolB  
Ddx5  
Ddx5  
Ddx5  
Ddx5  
BC058545  
Ccdc45  
mmu-mir-3064  
Polg2  
MtPolB  
MtPolB  
Ddx5  
Ddx5  
Ddx5  
Ddx5  
BC058545  
Ccdc45  
mmu-mir-3064  
Smurf2  
Smurf2  
1810010H24Rik  
1810010H24Rik  
Bptf  
Bptf  
Pitpnc1  
Pitpnc1  
Pitpnc1  
Pitpnc1  
Pitpnc1  
Pitpnc1  
Pitpnc1  
M-rdgB beta  
Psmd12  
Pitpnc1  
Pitpnc1  
Pitpnc1  
M-rdgB beta  
Psmd12  
AK049282  
AK043804  
Helz  
Helz  
Cacng4  
AK048292  
Prkca  
Prkca  
Prkca  
BC027814  
Gna13  
Gna13  
Slc16a6  
Slc16a6  
Arsg  
Arsg  
Slc16a6  
Slc16a6  
Arsg  
Arsg  
Abca5  
Abca5  
Abca5  
abca5  
abca5  
Kcnj2  
BC006965  
Sox9  
AK138212  
AK015526  
AK011682  
AK031204  
Slc39a11  
Slc39a11  
Slc39a11  
Slc39a11  
Slc39a11  
Slc39a11  
D11Wsu99e  
D11Wsu99e  
D11Wsu47e  
D11Wsu47e  
D11Wsu47e  
D11Wsu99e  
D11Wsu99e  
D11Wsu47e  
D11Wsu47e  
D11Wsu47e  
D11Wsu47e  
AK053334  
Ttyh2  
Dnaic2  
Dnaic2  
Dnaic2  
1500005I02Rik  
1500005I02Rik  
1500005I02Rik  
Gpr142  
Gprc5c

Gprc5c  
Gprc5c  
Gprc5c  
Gprc5c  
Gprc5c  
Gprc5c  
Gprc5c  
Rab37  
C630004H02Rik  
Cdr2l  
Atp5h  
Kctd2  
Atp5h  
Kctd2  
Atp5h  
Kctd2  
4933422H20Rik  
Slc16a5  
Slc16a5  
Slc16a5  
Armc7  
Grb2  
Grb2  
Grb2  
2310067B10Rik  
2310067B10Rik  
2310067B10Rik  
mKIAA0195  
Caskin2  
Tsen54  
Tsen54  
Tsen54  
Llgl2  
Caskin2  
Tsen54  
Tsen54  
Tsen54  
Llgl2  
Caskin2  
Llgl2  
Myo15b  
Myo15b  
Myo15b  
Galk1  
Unk  
Galk1  
Unk  
Galk1  
Unk  
muspaox  
Acox1  
Acox1  
2310004N24Rik  
Cdk3  
Srp68  
Galr2  
Exoc7  
Exoc7  
Rnf157  
AK011693  
Rnf157  
AK011693  
Prpsap1  
Prpsap1  
AK009121  
Sphk1  
Sphk1  
Sphk1  
Sphk1  
SPHK1a  
Sphk1  
Cygb  
Prcd  
Prcd  
1810032O08Rik  
1810032O08Rik  
Cygb  
Prcd  
Prcd  
1810032O08Rik  
1810032O08Rik  
Cygb  
1810032O08Rik  
1810032O08Rik  
Cygb  
1810032O08Rik  
1810032O08Rik  
Cygb  
1810032O08Rik  
1810032O08Rik  
mKIAA0585  
Jmjd6  
Ptdsr  
Sfrs2  
Sfrs2  
Mfsd11  
AK007898  
ET  
Mfsd11  
ET  
Mgat5b

Sep-09  
Sep-09

Tmc6  
Tmc6  
Tmc6  
Tmc6  
Tmc6  
Tmc6  
Tmc8  
Tmc8  
AK020081  
Tmc6  
Tmc6  
AK020081  
Clast2  
Syngr2  
Clast2  
Clast2  
Syngr2  
Clast2  
Afmid  
Afmid  
Clast2  
Tk1  
Afmid  
Afmid  
Clast2

Tk1  
Afmid  
Afmid  
Afmid  
Clast2  
Tk1  
Afmid  
Afmid  
Afmid  
Birc5  
Socs3  
Pgs1  
mKIAA3028  
mKIAA3028  
mKIAA3028  
mKIAA3028  
Timp2  
Ddc8  
Ddc8  
Timp2  
D11Bwg0517e  
D11Bwg0517e  
Cbx8  
Cbx8  
Cbx8  
Cbx8  
Cbx8  
AK149260  
Tbc1d16  
Card14  
Nptx1  
Raptor  
4932417H02Rik  
4932417H02Rik  
4932417H02Rik  
4932417H02Rik  
AK077811  
Baiap2  
Baiap2  
Baiap2  
AK077811  
Baiap2  
Baiap2  
Baiap2  
Aatk  
mKIAA0641  
Aatk  
Azi1  
1810073N04Rik  
1810073N04Rik  
1810073N04Rik  
1810073N04Rik  
AK084828  
Bahcc1  
Bahcc1  
AK084828  
Bahcc1  
Bahcc1  
AK084828  
Bahcc1  
Actg1  
AK005967  
Fscn2  
AK217863  
Actg1  
AK005967  
Fscn2  
AK217863  
2310003H01Rik  
2310003H01Rik  
2310003H01Rik  
Nploc4  
P4hb  
Stra13  
Lrrc45  
Rac3  
Stra13  
Dcxr  
Dcxr  
Cbr2  
AK195902  
Gps1  
Gps1  
Gps1  
Gps1  
Gps1  
Rfng  
radical-fringe  
Dus1l  
Dus1l  
Fasn  
Fasn  
Ccdc57  
Slc16a3  
Slc16a3  
Cd7  
Tex19  
Uts2r  
1110031I02Rik  
Tbcd  
AK031200  
AK035515  
Asxl2  
Ncoa1  
Fkbp1b  
FKBP1b-B  
BC068281  
BC068281  
BC068281  
Ubx4  
Ubx4  
Atad2b  
Atad2b  
mKIAA1921  
BC065777  
Pum2  
Pum2  
Pum2  
Laptm4a  
AK006240  
Osr1  
Kcns3  
5830483C08Rik  
Smc6  
Smc6  
Mycn  
Mycn  
Ddx1  
Ddx1  
4933425L03Rik  
Greb1  
E2f6  
E2f6  
Atp6v1c2  
Atp6v1c2  
Atp6c2  
Odc1  
Adam17  
Rrm2  
Id2  
Colec11



Rps7  
Rnaseh1  
Rnh1  
mKIAA0230  
mKIAA0230  
Pxdn  
Cbl1  
Cbl1  
Prkar2b  
Prkar2b  
4930504H06Rik  
Tspan13  
Etv1  
Etv1  
Nrcam  
Nrcam  
Nrcam  
Nova1  
Nova1  
Foxg1  
AK042354  
AK019435  
AK043991  
6030408C04Rik  
Strn3  
Ap4s1  
Ap4s1  
Heatr5a  
D930036F22Rik  
Arhgap5  
AK006587  
Npas3  
cbp146  
Ppp2r3c  
G5pr  
1110008L16Rik  
1110008L16Rik  
BC064451  
Titf1  
Titf1  
Sdccag1  
Sdccag1  
Sdccag1  
Arf6  
Pasma3  
AK015004  
AK035085  
Six1  
Six4  
Six4  
Mnat1  
Mnat1  
Six4  
Six4  
Mnat1  
Mnat1  
Six4  
Six4  
Mnat1  
Mnat1  
Tmem30b  
2600001A11Rik  
Sgpp1  
Sgpp1  
Nua  
Syne2  
Nua  
Syne2  
Nua  
Syne2  
Nua  
Syne2  
Esr2  
Esr2  
Tex21  
Tex21  
Zbtb25  
Zbtb25  
Zbtb1  
Zbtb1  
Hspa2  
AK133227  
Plekhg3  
Plekhg3  
Plekhg3  
Rab15  
Fntb  
Max  
Max  
Gphn  
Pals1  
Mpp5  
Mpp5  
Atp6v1d  
Eif2s1  
Plek2  
6330442E10Rik  
6330442E10Rik  
Zfyve26  
Zfyve26  
Rad51l1  
Rad51l1  
Rad51l1  
Synj2bp  
1810020G14Rik  
Synj2bp  
Arip2  
Synj2bp  
Pcnx  
Sipa1l1  
Sipa1l1  
Sipa1l1  
Sipa1l1  
Dpf3  
Dpf3  
Numb  
Acot2  
Dnalc1  
C130039O16Rik  
C130039O16Rik  
C130039O16Rik  
C130039O16Rik  
C130039O16Rik  
Zadh1  
Zadh1  
Zfp410  
Zfp410  
Zfp410  
Zfp410  
Zfp410  
Apa1  
9830169C18Rik  
9830169C18Rik  
Coq6  
Coq6  
Entpd5  
Entpd5  
2900006K08Rik

Rnf113a2  
Entpd5  
Entpd5  
2900006K08Rik  
Rnf113a2  
Aldh6a1  
Lin52  
Abcd4  
Abcd4  
Abcd4  
Abcd4  
Abcd4  
Abcd4  
7420416P09Rik  
Npc2  
Ltbp2  
Rps6kl1  
Rps6kl1  
Nek9  
Fos  
Jundm2  
Jundm2  
Tgfb3  
1700019E19Rik  
6430527G18Rik  
6430527G18Rik  
mKIAA1737  
2310044G17Rik  
2310044G17Rik  
Tmed8  
Al413782  
Al413782  
Al413782  
Ahsa1  
Nrxn3  
Gtf2a1  
Gtf2a1  
AK053772  
AK131831  
Calm1  
Calm1  
Rps6ka5  
Rps6ka5  
Rps6ka5  
Rps6ka5  
Tc2n  
Tc2n  
Tc2n  
Itpk1  
Moap1  
Moap1  
5730410I19Rik  
5730410I19Rik  
Moap1  
Moap1  
5730410I19Rik  
5730410I19Rik  
Btbd7  
Btbd7  
Btbd7  
Asb2  
Otub2  
8430415E04Rik  
Clmn  
mKIAA1188  
Clmn  
mKIAA1188  
Bdkrb2  
Bdkrb2  
Bdkrb1  
Papola  
Bcl11b  
Setd3  
Setd3  
Ccnk  
Ppp2r5c  
mKIAA0044  
Rage  
MOK  
AK015341  
AK013356  
Rage  
MOK  
AK013356  
Rcor1  
Amn  
Amn  
AK039023  
1200009I06Rik  
1200009I06Rik  
1200009I06Rik  
Klc1  
Klc1  
Klc1  
Klc1  
Kif26a  
BC115444  
AW555464  
AW555464  
AW555464  
Crip1  
4930427A07Rik  
Wdr60  
Wdr60  
Wdr60  
D430033N04Rik  
D12Ert551e  
D12Ert551e  
D12Ert551e  
Wdr60  
Wdr60  
Wdr60  
D430033N04Rik  
D12Ert551e  
D12Ert551e  
D12Ert551e  
Ragef5  
Dnahc11  
Sp8  
Sp8  
Sp8  
Sp8  
Sp8  
Sp8  
Itgb8  
Itgb8

Itgb8  
Gdi2  
AK164218  
Gdi2  
AK164218  
BC016423  
mKIAA2006  
Wdr37  
Wdr37  
Wdr37  
Wdr37  
AK016837  
Idi1  
Zmynd11  
Zmynd11  
Ryr2  
Gli3  
Gli3  
Gli3  
Gli3  
Gli3  
Gli3  
AK045681  
AK078363  
Inhba  
Cdc2l5  
Cdc2l5  
Cdc2l5  
Zscan12  
Zscan12  
Zscan12  
DQ686689  
DQ702757  
AK132930  
Hist1h2ai  
Hist1h3h  
Hist1h2bm  
Hist1h4k  
Hist1h2bn  
mmu-mir-1983  
Zfp184  
Prss16  
Prss16  
Prss16  
Hist1h2bk  
Hist1h2bj  
Hist1h2ah  
Hist1h4i  
Hist1h2ag  
Hist1h2bj  
Hist1h2ah  
Hist1h4i  
Hist1h2ag  
Zfp322a  
Zfp322a  
Zfp322a  
Abt1  
Abt1  
Abt1  
AK040430  
AK040430  
AK040430  
AK040430  
Btn1a1  
Btn1a1  
Btn1a1  
Btn1a1  
Hist1h2bh  
Hist1h4f  
Hist1h1d  
Hist1h2bg  
Hist1h2ae  
Hist1h2bf  
Hist1h2be  
Hist1h1c  
Hist1h2bb  
Hist1h2ab  
Hist1h3b  
Hist1h4b  
Hist1h3c  
AK016178  
Hist1h4a  
Hist1h3a  
Hist1h1a  
Scgn  
Scgn  
Them2  
AK140178  
Ttrap  
Ttrap  
D130043K22Rik  
Sox4  
Sox4  
Sox4  
Cdkal1  
Cdkal1  
Cdkal1  
Exoc2  
Exoc2  
EG432743  
BC070417  
AK009887  
Prpf4b  
Prpf4b  
Prpf4b  
Prpf4b  
Prpf4b  
Prpf4b  
Prpf4b  
Prpf4b  
Prpf4b  
Nrn1  
Nrn1  
Tcfap2a  
Tcfap2a  
Tcfap2a  
Tcfap2a  
Tcfap2a  
Tcfap2a  
Tcfap2a  
AK017409  
Tcfap2a  
Tcfap2a  
Tcfap2a  
Tcfap2a  
Tcfap2a  
Tcfap2a  
Tcfap2a  
AK017409  
Gcnt2  
Gcnt2  
Gcnt2  
Gcnt2  
Nedd9  
Nedd9  
AK132865  
Nedd9  
Nedd9  
AK132865  
Sirt5  
Sirt5  
Ccdc90a  
Ccdc90a  
Atxn1  
Gm1574  
Nup153  
Kif13a  
Dek  
Rnf144b  
AK034282

AK034282  
AK039372  
Id4  
AK034282  
AK039372  
Id4  
Barx1  
Cenpp  
Cenpp  
Nol8  
Nol8  
Shc3  
Gadd45g  
Gadd45g  
Auh  
Sptlc1  
AK006343  
AK030238  
BC100495  
DQ711560  
DQ689104  
DQ558020  
DQ712497  
DQ549198  
DQ703302  
DQ699684  
DQ553546  
Uimc1  
Rxrip110  
Zfp346  
Zfp346  
Zfp346  
Lman2  
Lman2  
Rgs14  
Rgs14  
Pdlim7  
Pdlim7  
Pdlim7  
Pdlim7  
Neurog1  
Smad5  
Smad5  
Smad5  
Smad5  
Trpc7  
5133401N09Rik  
Gkap1  
Gkap1  
AK015814  
Zcchc6  
Zcchc6  
Zcchc6  
Gas1  
2010111I01Rik  
2010111I01Rik  
apo  
apo  
apo  
2010111I01Rik  
2010111I01Rik  
apo  
apo  
apo  
Ptch1  
PTCH  
PTCH  
Ptch1  
PTCH  
PTCH  
2410141K09Rik  
Zfp817  
Zfp87  
Zfp817  
Zfp87  
Zfp817  
Zfp87  
Adcy2  
Arts1  
Arts1  
AK018847  
Eil2  
mKIAA1376  
Arrdc3  
mKIAA1376  
Gpr98  
Gpr98  
Gpr98  
Gpr98  
AK144545  
Cetn3  
AK053270  
Tmem161b  
Vcan  
Cspg2  
Vcan  
Vcan  
Cspg2  
AK040967  
AK087351  
Vcan  
Cspg2  
Vcan  
Cspg2  
AK040967  
AK087351  
AK043659  
AK047727  
6430502M16Rik  
6430502M16Rik  
Zfyve16  
Papd4  
Papd4  
Lhfp12  
F2rl1  
Iqgap2  
Sv2c  
AK157788  
Rgnef  
mKIAA1998  
Utp15  
Ankra2  
Ankra2  
Ankra2  
Ankra2  
Ankra2  
Foxd1  
Ptcd2  
Mrps27  
Mtap1b  
Mtap1b  
AK135852  
Gtf2h2  
Gtf2h2  
Gtf2h2  
Gtf2h2  
Gtf2h2  
Erbp2ip  
Erbp2ip  
2410002O22Rik  
2410002O22Rik  
Trim23  
Trim23  
2410002O22Rik  
2410002O22Rik  
Trim23  
Trim23  
Sdccag10  
3110031B13Rik

Kif2a  
Kif2a  
AK043130  
AK136919  
Zswim6  
2810008M24Rik  
2810008M24Rik  
Depdc1b  
Depdc1b  
Pde4d  
Pde4d  
Pde4d  
Pde4d  
GPBP  
Gpbp1  
Mier3  
Mier3  
Mier3  
Mier3  
Map3k1  
Fst  
Fst  
Itga2  
Isl1  
isl1-beta  
Parp8  
Parp8  
Parp8  
Parp8  
Dnase1l3  
Abhd6  
Abhd6  
4930452B06Rik  
4930452B06Rik  
4930452B06Rik  
4930452B06Rik  
AK015458  
AK132658  
AK006409  
Slc4a7  
Slc4a7  
Slc4a7  
Slc4a7  
Lrrc3b  
Lrrc3b  
AK080648  
Top2b  
Top2b  
Rpl15  
Nkiras1  
Ube2e1  
Ube2e2  
2700060E02Rik  
Ecd  
AA536717  
AA536717  
AA536717  
Anxa7  
Anxa7  
Anxa7  
Anxa7  
AK018074  
2310021P13Rik  
2310021P13Rik  
2310021P13Rik  
Vdac2  
AK079754  
Zfp503  
Kcnma1  
Kcnma1  
Slo  
Kcnma1  
Dlg5  
AK086741  
AK047978  
Zmiz1  
Zmiz1  
AK086741  
AK047978  
Zmiz1  
Zmiz1  
AK086741  
AK047978  
Zmiz1  
Zmiz1  
Zmiz1  
Zmiz1  
Zmiz1  
AK076950  
Arf4  
E430028B21Rik  
AK044563  
Wnt5a  
Wnt5a  
Prkcd  
Prkcd  
Prkcd  
Prkcd  
Prkcd  
Sh3bp5  
Sh3bp5  
Sh3bp5  
Sh3bp5  
Mettl6  
Mettl6  
Eaf1  
Timm23  
Parg  
Parg  
Parg  
Parg  
Ogdhl  
Prrxl1  
AK041587  
Anxa8  
Wapal  
Gnpnat1  
Bmp4  
Cnih  
Samd4  
Samd4  
C130032J12Rik  
C130032J12Rik  
Peli2  
Otx2  
Otx2  
Otx2  
AK042665  
Otx2  
Otx2  
Otx2  
AK042665  
AK042665  
Ttc5  
Osgep  
Apex1  
Mett11d1  
Mett11d1  
Slc39a2  
Slc39a2  
Zfp219  
Zfp219  
Zfp219  
Zfp219  
G630016D24Rik  
Zfp219  
Zfp219  
Zfp219

G630016D24Rik  
Supt16h  
AK146690  
Chd8  
Supt16h  
AK146690  
Chd8  
Rab2b  
Rab2b  
Rab2B  
mKIAA0737  
Tox4  
Tox4  
Mettl3  
Mettl3  
Sall2  
Sall2  
Sall2  
Sall2  
Slc7a7  
Slc7a7  
Mrpl52  
Mrpl52  
Mrpl52  
Mrpl52  
Lrp10  
Rem2  
D14Erttd500e  
Jub  
Jub  
Jub  
Jub  
Cdh24  
Acin1  
Acin1  
Acin1  
Cdh24  
Acin1  
Acin1  
Acin1  
Acin1  
Acin1  
Slc7a8  
Lat2  
Homez  
Homez  
Bcl2l2  
Homez  
Bcl2l2  
Bcl2l2  
Pabpn1  
Pabpn1  
Pabpn1  
Slc22a17  
mboct  
Slc22a17  
Il25  
Slc22a17  
mboct  
Slc22a17  
Efs  
Il25  
Cmtm5  
Cmtm5  
Ngdn  
Thtpa  
Zfhx2  
Zfhx2  
Thtpa  
Thtpa  
Zfhx2  
Thtpa  
Ap1g2  
G2ad  
Ap1g2  
G2ad  
Ap1g2  
G2ad  
Ap1g2  
G2ad  
Jph4  
Jph4  
Jph4  
Jph4  
Ap1g2  
G2ad  
Ap1g2  
G2ad  
Jph4  
Jph4  
Jph4  
Jph4  
Ap1g2  
G2ad  
Ap1g2  
G2ad  
Jph4  
Jph4  
Jph4  
Jph4  
1500005A01Rik  
1500005A01Rik  
Psme2  
Psme2  
Rnf31  
Rnf31  
Isgf3g  
Isgf3g  
Isgf3g  
1810034K20Rik  
Nedd8  
Gmpr2  
Gmpr2  
Nedd8  
Tinf2  
Pspc1  
Pspc1  
Gjb2  
Xpo4  
mKIAA1721  
Xpo4  
mKIAA1721  
Lats2  
F630043A04Rik  
Mrp63  
Fgf9  
Fgf9  
Setdb2  
Setdb2  
Cab39l  
Cab39l  
Cab39l

Setdb2  
Setdb2  
Cab39l  
Cab39l  
Cab39l  
Setdb2  
Setdb2  
Cab39l  
Cab39l  
Cab39l  
Cdadc1  
Cdadc1  
Cdadc1  
Tmem46  
Tmem46  
mFLJ00298  
Spata13  
Spata13  
mFLJ00298  
Spata13  
Spata13  
Tnfrsf19  
Tnfrsf19  
Tnfrsf19  
Tnfrsf19  
Tnfrsf19  
AF380425  
AK134888  
AK080165  
AK143097  
AK033134  
AK029956  
mmu-mir-16-1  
mmu-mir-15a  
AK134888  
AK080165  
AK139063  
AK134888  
AK080165  
AK139063  
AK134888  
AK080165  
AK139063  
Ints6  
Ints6  
Ints6  
Ints6  
Ints6  
AK016511  
Ints6  
Ints6  
Ints6  
Ints6  
Ints6  
AK016511  
Ctsb  
Fdft1  
Fdft1  
Neil2  
Neil2  
AK044422  
mmu-mir-124-1  
mmu-mir-3078  
AK044422  
mmu-mir-124-1  
mmu-mir-3078  
Extl3  
Zfp395  
Zfp395  
Zfp395  
Zfp395  
Pbk  
Ebf2  
Ebf2  
Nefl  
Nefm  
AK162870  
Rhobtb2  
Rhobtb2  
Rhobtb2  
Rhobtb2  
Rhobtb2  
Rhobtb2  
1700081D17Rik  
1700081D17Rik  
Egr3  
Egr3  
Egr3  
Egr3  
Egr3  
Egr3  
Egr3  
Egr3  
Bin3  
Rai16  
Gfra2  
Klf5  
Klf5  
Gpc6  
Gpc6  
EG328479  
Zic5  
Zic2  
Fbxo4  
AW549877  
AW549877  
AK041537  
Card6  
Rpl37  
Dab2  
Dab2  
Dab2  
Nipbl  
Nipbl  
Nipbl  
1110020G09Rik  
1110020G09Rik  
1110020G09Rik  
1110020G09Rik  
1110020G09Rik  
1110020G09Rik  
Npr3  
Npr3  
Npr3  
BC028532  
Npr3  
Npr3  
Npr3  
BC028532  
Zfr  
Golp3  
Golp3  
Pdzd2  
Pdzd2  
Pdzd2  
Pdzd2  
Pdzd2  
6030458C11Rik  
6030458C11Rik  
Rnasen  
Rnasen  
Rnasen  
AK048368  
Cdh10  
Cdh10  
Myo10  
Myo10  
myo 10

Myo10  
Trio  
Trio  
Mar-06  
Sema5a  
Sema5a  
Sema5a  
Sema5a  
Sema5a  
Sema5a  
Mtdh  
Mtdh  
Mtdh  
Hrsp12  
Pop1  
Osr2  
Osr2  
Osr2  
Osr2  
Ywhaz  
Ywhaz  
Ywhaz  
Grhl2  
Ubr5  
Azin1  
Azin1  
Fzd6  
Fzd6  
Rims2  
Oxr1  
Oxr1  
Rspo2  
Rspo2  
Rspo2  
Nudcd1  
Nudcd1  
Nudcd1  
Eny2  
Eny2  
Csmc3  
Csmc3  
Eif3h  
D530033C11Rik  
Ext1  
Sntb1  
Has2  
NR\_002874  
Zhx2  
Derl1  
Wdr67  
Wdr67  
Wdr67  
Mtss1  
mKIAA0429  
Trib1  
Trib1  
Myc  
Myc  
Myc  
Myc  
Myc  
Myc  
Ddef1  
Adcy8  
Adcy8  
Lrrc6  
St3gal1  
AK169958  
1810044A24Rik  
1810044A24Rik  
1810044A24Rik  
1810044A24Rik  
Arc  
Exosc4  
Gpaa1  
Gpaa1  
Cyc1  
Cyc1  
Cyhr1  
Chrp  
Chrp  
Cyhr1  
Kifc2  
Kifc2  
Ppp1r16a  
Ppp1r16a  
Commd5  
Rpl8  
Rbm9  
Myh9  
Myh9  
Myh9  
Ean57  
1700061J05Rik  
Tst  
Mpst  
Mpst  
Ean57  
1700061J05Rik  
Tst  
Mpst  
Mpst  
Kctd17  
C1qtnf6  
C1qtnf6  
Sstr3  
Mfng  
Card10  
Card10  
Gga1  
AK131739  
Lgals1  
Nol12  
Triobp  
Triobp  
Micall1  
Micall1  
Micall1  
Slc16a8  
Baiap2l2  
Baiap2l2  
Pla2g6  
Pla2g6  
Pla2g6  
Maff  
Kcnj4  
Kdelr3  
4933432B09Rik  
4933432B09Rik  
Tomm22  
Cbx7  
Cbx7  
Tnrc6b  
Tnrc6b  
Tnrc6b  
Tnrc6b  
Tnrc6b  
Tnrc6b  
Mkl1  
Mkl1  
Mkl1  
St13  
St13  
Xpnpep3  
Xpnpep3  
Ep300  
Ep300  
Ep300



Rangap1  
Rangap1  
mKIAA1835  
Zc3h7b  
Zc3h7b  
Rangap1  
Rangap1  
mKIAA1835  
Zc3h7b  
Zc3h7b  
Tob2  
AK044623  
Aco2  
Tob2  
AK044623  
Aco2  
Tob2  
AK044623  
Aco2  
D15Wsu75e  
Xrcc6  
Xrcc6  
Tcf20  
Poldip3  
Poldip3  
Phf21b  
Phf21b  
Celsr1  
Celsr1  
Cerk  
Tubgcp6  
Hdac10  
Mapk12  
Mapk12  
Mapk12  
Mapk12  
Plxnb2  
1700027J05Rik  
1700027J05Rik  
Saps2  
Saps2  
Saps2  
1700027J05Rik  
Saps2  
Saps2  
Saps2  
1700027J05Rik  
Saps2  
Saps2  
Saps2  
Mapk8ip2  
Slc2a13  
Lrrk2  
Prickle1  
Prickle1  
Prickle1  
Prickle1  
Nell2  
Nell2  
Tmem16f  
AK163711  
1700124K17Rik  
Slc38a1  
Slc38a1  
Slc38a1  
Slc38a1  
Slc38a1  
Slc38a1  
Slc38a2  
mKIAA1382  
BC038822  
BC038822  
Rapgef3  
4930570C03Rik  
4930570C03Rik  
Col2a1  
Senp1  
Senp1  
Senp1  
Pfk  
Pfk  
Ccnt1  
Ccnt1  
AK140384  
4930415O20Rik  
Cacnb3  
Cacnb3  
Cacnb3  
Cacnb3  
Cacnb3  
Cacnb3  
Ddx23  
Ddx23  
Ddx23  
Rnd1  
Arf3  
5830427D03Rik  
Ddn  
AK157795  
Ddn  
AK157795  
AK140390  
BC012717  
Rheb1  
Dhh  
Lmbr1l  
Tuba1b  
Tuba1b  
Tuba1a  
Tuba1b  
Tuba1a  
Tuba1b  
Tuba1a  
Tuba1a  
AK016307  
Tuba1c  
Prph  
Prph  
Troap  
Troap  
Troap  
Troap  
Troap  
Troap  
C1ql4  
2810451A06Rik  
C1ql4  
2810451A06Rik  
Spats2  
Spats2  
Spats2  
Kcnh3  
Kcnh3  
Mcrcs1  
Mcrcs1  
MSP58  
Lima1  
Gm920  
Larp4  
D330037H05Rik  
Larp4  
Larp4  
Gm920  
Larp4  
D330037H05Rik  
Larp4  
Larp4  
AI317237  
AI317237

AI317237  
Nramp2  
Tcfcp2  
Tcfcp2  
Tcfcp2  
Tcfcp2  
Tcfcp2  
Tcfcp2  
Tcfcp2  
BC004728  
BC004728  
Scn8a  
Ankrd33  
Krt18  
Itgb7  
Rarg  
Rarg  
Rarg  
Rarg  
Esp1  
Aaas  
Aaas  
Aaas  
Aaas  
Sp7  
Sp7  
Sp7  
Sp7  
Sp1  
Sp1  
hnRNP X  
Pcbp2  
Pcbp2  
Pcbp2  
hnRNP X  
Pcbp2  
Pcbp2  
hnRNP X  
Atf7  
Atp5g2  
Atp5g2  
AK035706  
Hoxc11  
Hoxc10  
mmu-mir-196a-2  
AK035706  
Hoxc10  
Hoxc9  
mmu-mir-196a-2  
Hoxc9  
Hoxc8  
Hoxc6  
Hoxc5  
Hoxc4  
Hoxc4  
mmu-mir-615  
Cbx5  
Cbx5  
Cbx5  
AK084270  
Hnrnpa1  
Nfe2  
AK207593  
Gpr84  
Zfp385  
Zfp385  
Crebbp  
NR\_003628  
Crebbp  
NR\_003628  
Glis2  
Magmas  
Coro7  
Vasn  
5730403B10Rik  
5730403B10Rik  
AK153988  
Mgrn1  
mKIAA0544  
Mgrn1  
3930401K13Rik  
3930401K13Rik  
3930401K13Rik  
Ubn1  
Ubn1  
Ubn1  
3930401K13Rik  
3930401K13Rik  
3930401K13Rik  
Ubn1  
Ubn1  
Ubn1  
Grin2a  
AK086290  
2700045P11Rik  
AK049860  
BC030884  
Ntan1  
2410018G20Rik  
2410018G20Rik  
Igl1  
AK137552  
Vpreb1  
mTOP3beta  
Top3b  
Top3b  
Top3b  
Top3b  
mTOP3beta  
mTOP3beta  
Igl1  
AK137552  
Vpreb1  
mTOP3beta  
Top3b  
Top3b  
Top3b  
Top3b  
mTOP3beta  
mTOP3beta  
Ppm1f  
Ppm1f  
Ube2l3  
ubcM4  
Gm603  
Pi4ka

Pik4ca  
Snap29  
4930451C15Rik  
4930451C15Rik  
P2rxl1  
P2rxl1  
Gnb1l  
Wdvcf  
Wdvcf  
Gnb1l  
Tbx1  
Tbx1  
Mrpl40  
Hira  
Hira  
Parl  
Parl  
Ap2m1  
Abcf3  
Abcf3  
Ap2m1  
Abcf3  
Abcf3  
Abcf3  
Abcf3  
Alg3  
Alg3  
Ece2  
Camk2n2  
Ece2  
Ece2  
Ece2  
Ece2  
Clcn2  
Polr2h  
Chrd  
Chrd  
Chrd  
AK043964  
AK043964  
2510009E07Rik  
2510009E07Rik  
Sfrs10  
Etv5  
Eif4a2  
Rfc4  
Rfc4  
Rfc4  
Adipoq  
B630019A10Rik  
St6gal1  
Bcl6  
Il1rap  
Il1rap  
Il1rap  
Il1rap  
Fgf12  
Fgf12  
Hes1  
Centb2  
Mfi2  
Fbxo45  
Wdr53  
Rnf168  
mmu-mir-1946a  
Pcyt1a  
Pcyt1a  
Tfrc  
Tfrc  
Tfrc  
Tnk2  
Tnk2  
Tnk2  
Tnk2  
Iqcg  
Rpl35a  
Rpl35a  
Rpl35a  
Lmln  
Osbpl11  
Osbpl11  
AK160141  
Zfp148  
Zfp148  
AK160141  
Zfp148  
Zfp148  
Itgb5  
Kalrn  
Sema5b  
Dirc2  
Hspbap1  
Hspbap1  
Dirc2  
Hspbap1  
Hspbap1  
Dirc2  
Hspbap1  
Hspbap1  
Eaf2  
Eaf2  
Traits  
Iqcb1  
Iqcb1  
4932425124Rik  
4932425124Rik  
Cox17  
Popdc2  
Pla1a  
Adprh  
AK086460  
Cd80  
Cd80  
4930455C21Rik  
Lsamp  
Lsamp  
Lsamp  
Atp6v1a  
Atp6v1a  
Nat13  
Gm608  
Sidt1  
AK047199  
Ccdc52  
Ccdc52  
Slc35a5  
Atg3  
Atg3  
Phldb2  
Phldb2  
Phldb2  
Cd47  
Cd47  
Bbx

Bbx  
Bbx  
Bbx  
Bbx  
Hbp2  
Bbx  
Bbx  
Bbx  
Bbx  
Bbx  
Hbp2  
AK144852  
Alcam  
Pcnp  
Pcnp  
Rg9mtd1  
Senp7  
Senp7  
mKIAA1707  
Senp7  
Senp7  
Senp7  
Senp7  
mKIAA1707  
Senp7  
Senp7  
Senp7  
Gpr15  
Cldnd1  
Cldnd1  
Epha3  
Epha3  
Cggbp1  
Cggbp1  
Robo1  
Robo1  
Robo1  
Nrip1  
Nrip1  
AK144299  
AK012955  
mmu-mir-125b-2  
App  
Tiam1  
Tiam1  
Tiam1  
Tiam1  
Tiam1  
Tiam1  
Sod1  
Sod1  
Sfrs15  
Sfrs15  
Hunk  
1110004E09Rik  
AK005956  
Synj1  
4932438H23Rik  
Gart  
Gart  
Son  
Son  
Son  
Donson  
AK038992  
Cryz1  
Cryz1  
AK045951  
Rcan1  
Rcan1  
Runx1  
Runx1  
Runx1  
Runx1  
Runx1  
Runx1  
Runx1  
Runx1  
Runx1  
Dopey2  
Dopey2  
mKIAA0933  
AK009785  
Ripply3  
Ripply3  
Brwd1  
Brwd1  
Brwd1  
4921526F01Rik  
4921526F01Rik  
Arid1b  
Arid1b  
Arid1b  
Arid1b  
Arid1b  
5730437N04Rik  
5730437N04Rik  
5730437N04Rik  
AK163710  
2210038L17Rik  
2210038L17Rik  
Tulp4  
AK163710  
2210038L17Rik  
2210038L17Rik  
Tulp4  
AK139523  
AK139523  
Mrpl18  
AK163149  
Tcp1  
AK139523  
AK139523  
Mrpl18  
AK163149  
Tcp1  
Wdr27  
AK004434  
Wdr27  
1600012H06Rik  
Phf10  
Phf10  
Wdr27  
AK004434  
Wdr27  
Phf10  
Phf10  
9030025P20Rik  
9030025P20Rik  
9030025P20Rik  
9030025P20Rik  
AK145347  
Dll1  
Dll1  
4932442K08Rik  
Psmb1  
Tbp  
Tbp  
Pdc2  
Chd1  
Chd1  
Rgmb  
Rgmb  
Lnpep  
Lnpep  
Lnpep  
AK137492  
Lnpep  
Lnpep  
Lnpep

AK137492  
4930546H06Rik  
4930546H06Rik  
mmu-mir-99b  
mmu-let-7e  
mmu-mir-125a  
V1rf5  
Zfp160  
Zfp160  
Zfp160  
Zfp51  
Zfp51  
Zfp51  
AK008833  
Zfp13  
Zfp13  
Zscan10  
Zscan10  
Zfp206  
Zscan10  
Zfp206  
Zfp13  
Zfp13  
Zscan10  
Zscan10  
Zfp206  
Zscan10  
Zfp206  
1520401A03Rik  
Pkmyt1  
Myt1  
Myt1  
AK037113  
Abca17  
Abca3  
Abca3  
Abca3  
Abca3  
AK038021  
AK084778  
Rnps1  
Dci  
AK038021  
AK084778  
Rnps1  
Dci  
AK014798  
Gbl  
Gbl  
Caskin1  
Caskin1  
Slc9a3r2  
Slc9a3r2  
Zfp598  
Syng3  
Gfer  
Tb13  
Rps2  
Rps2  
NR\_002897  
Fahd1  
Hagh  
Cacna1h  
Axin1  
Axin1  
Dusp1  
Nkx2-5  
Nkx2-5  
Cuta  
Cuta  
DQ716012  
Zbtb9  
Bak1  
Ggnbp1  
Bak1  
Itr3  
Itr3  
Itr3  
2900010M23Rik  
Lemd2  
Hmga1  
Hmga1  
Hmga1  
Hmga1  
D17Wsu92e  
D17Wsu92e  
D17Wsu92e  
D17Wsu92e  
F830021D11Rik  
Tcp11  
Tcp11  
Scube3  
Scube3  
Scube3  
Tead3  
Tead3  
Tead3  
Fkbp5  
AK146407  
AK162363  
4930511111Rik  
Slc26a8  
Mapk14  
Mapk14  
Pxt1  
Kctd20  
Kctd20  
Kctd20  
Stk38  
Stk38  
Sfrs3  
AK144811  
Cdkn1a  
Cdkn1a  
AK156427  
1300018I05Rik  
AK156427  
1300018I05Rik  
AK156427  
1300018I05Rik  
Glo1  
Dnahc8  
Dnahc8  
Dnahc8  
Glp1r  
Rsph1  
Slc37a1  
Slc37a1  
Pde9a  
Pde9a  
Hsf2bp  
Rrp1b  
Rrp1b  
Cyp4f16  
Cyp4f16  
Cyp4f16  
Cyp4f16  
Cyp4f13  
6030422M01Rik  
Zfp472  
C920016K16Rik  
BC057593  
Zfp422-rs1  
Adamts10  
Adamts10  
Adamts10  
Myo1f  
Hnrpm  
Hnrpm

mKIAA4193

Mar-02  
Mar-02  
Mar-02  
Mar-02  
Mar-02

Rab11b  
Angptl4  
Kifc1  
Kifc1  
BC033916  
Daxx  
Daxx  
Kifc1  
Kifc1  
AK136742  
Daxx  
Daxx  
Zbtb22  
Tapbp  
Kifc1  
Kifc1  
AK136742  
Daxx  
Daxx  
Zbtb22  
Tapbp  
Rgl2  
AK136742  
Zbtb22  
AK140218  
Tapbp  
Rgl2  
AK140218  
Tapbp  
Rgl2  
Wdr46  
AK140218  
Tapbp  
Rgl2  
Wdr46  
Ring1  
H2-Ke6  
H2-Ke6  
Slc39a7  
Rxb  
Rxb  
Col11a2  
Col11a2  
Col11a2  
mmu-mir-219-1  
AK136114  
Brd2  
Brd2  
Brd2  
Brd2  
H2-DMA  
Brd2  
Brd2  
Brd2  
Brd2  
H2-DMA  
H2-DMA  
Psm9  
Tap1  
Tap1  
Psm8  
Tap2  
Psm9  
Tap2  
Hspa1a  
Lsm2  
Lsm2  
SmX5  
SmX5  
Vars  
Vars  
Hspa1a  
Lsm2  
Lsm2  
SmX5  
SmX5  
Vars  
Vars  
D17H6S56E-5  
D17H6S56E-5  
AK088743  
Vars  
Vars  
D17H6S56E-3  
D17H6S56E-3  
Msh5  
Msh5  
Msh5  
Msh5  
Clic1  
Ddah2  
NR\_001462  
Ly6g6c  
Ly6g6c  
Msh5  
Msh5  
Msh5  
Msh5  
Clic1  
Ddah2  
NR\_001462  
Ly6g6c  
Ly6g6c  
Msh5  
Msh5  
Msh5  
Msh5  
Clic1  
Ddah2  
NR\_001462  
Ly6g6c  
Ly6g6c  
Bat2  
Bat2  
Nfkbil1  
BC025190  
Atp6v1g2  
Bat1a  
Bat1a  
Bat1a  
Bat1a  
Bat1a  
Bat1a  
Nfkbil1  
BC025190  
Atp6v1g2  
Bat1a  
Bat1a  
Bat1a  
Bat1a  
Bat1a  
Bat1a  
Bat1a  
Nfkbil1  
Bat1a  
Bat1a  
Bat1a  
Bat1a  
Bat1a  
Nfkbil1  
Bat1a  
Bat1a

Bat1a  
Bat1a  
Bat1a  
Tcf19  
Cchcr1  
Psors1c2  
Dpcr1  
AK087178  
Vars2  
Vars2  
Gtf2h4  
Ddr1  
Nep  
Ddr1  
Ddr1  
Ddr1  
Ddr1  
Abcf1  
Gna-rs1  
mmu-mir-877  
Abcf1  
Prr3  
Prr3  
CAT56  
Gna-rs1  
BC055918  
mmu-mir-877  
Prr3  
Prr3  
CAT56  
BC055918  
Rpp21  
CAT60  
Trim39  
Trim39  
Trim39  
Trim39  
Trim39  
Trim26  
Trim26  
Trim26  
Trim26  
Ppp1r11  
1700022C21Rik  
1700022C21Rik  
Mog  
Gabbr1  
Gabbr1  
GABA-B-R  
Gabbr1  
Gabbr1  
Gabbr1  
GABA-B-R  
Gabbr1  
Gabbr1  
Cd2ap  
Aars2  
Aarsl  
Tcte1  
Hsp90ab1  
Hsp90ab1  
Tmem63b  
Mrpl14  
Vegfa  
Vegfa  
Vegf  
Vegfa  
Vegfa  
Vegf  
Polh  
Xpo5  
Xpo5  
Tjap1  
Tjap1  
Dlk2  
Dlk2  
Abcc10  
Abcc10  
Abcc10  
Zfp318  
Zfp318  
AK144536  
BC048355  
Parc  
Parc  
Parc  
Srf  
Klhdc3  
Ppp2r5d  
Ppp2r5d  
Pex6  
Gnmt  
Tnrc5  
Ptcra  
Rpl7l1  
Rpl7l1  
Ubr2  
Ubr2  
Ubr2  
Ubr2  
Trerf1  
Trerf1  
Trerf1  
1700001C19Rik  
Al661453  
Ccnd3  
Ccnd3  
Ccnd3  
Med20  
Med20  
Med20  
Usp49  
Ccnd3  
Ccnd3  
Ccnd3  
Med20  
Med20  
Med20  
Usp49  
Ccnd3  
Ccnd3  
Ccnd3  
Med20  
Med20  
Med20  
Usp49  
Bysl  
Med20  
Usp49  
Usp49  
AK043085  
Trem3  
Trem14  
Trem3  
Trem14  
Plcl2  
Kcnh8  
Pcaf  
Pcaf  
Sgo1  
Sgo1  
Pot1b  
Pot1b  
BC031441  
BC031441  
Ebi3  
Ccdc94  
Shd

BC031441  
BC031441  
Ccdc94  
Shd  
Ticam1  
Ticam1  
Ticam1  
Ticam1  
M6prbp1  
Uhrf1  
Uhrf1  
M6prbp1  
Arrdc5  
Uhrf1  
Uhrf1  
M6prbp1  
Arrdc5  
Uhrf1  
Uhrf1  
2410015M20Rik  
Qil1  
Rpl36  
AK014981  
Ranbp3  
Ranbp3  
Ranbp3  
Khsrp  
Slc25a41  
Dennd1c  
Dennd1c  
Tubb4  
AK154177  
AK047366  
Tnfsf9  
C3  
Gpr108  
Trip10  
Gpr108  
Trip10  
Vav1  
Vav1  
Vav1  
Efna5  
Vapa  
Vapa  
Ralbp1  
Ralbp1  
Ralbp1  
AK079730  
Ralbp1  
Ralbp1  
Ralbp1  
AK079730  
Ddx11  
1110012J17Rik  
Arhgap28  
Tgif1  
Tgif1  
Tgif1  
Mylc2b  
Mylc2b  
2900073G15Rik  
Myom1  
Myom1  
mKIAA0650  
Alk  
2810410M20Rik  
2810410M20Rik  
2810410M20Rik  
Birc6  
Birc6  
Strn  
Prkcn  
Prkcn  
Prkcn  
Prkcn  
Prkcn  
Prkcn  
Prkcn  
Prkcn  
Prkcn  
Qpct  
Arl6ip2  
Arl6ip2  
Arl6ip2  
Sos1  
Sos1  
Sos1  
Sos1  
Map4k3  
Map4k3  
Cox7a2l  
Mta3  
Mta3  
Mta3  
Mta3  
Haa0  
Haa0  
AK036982  
Haa0  
Haa0  
AK036982  
Thada  
Thada  
Plekhh2  
Plekhh2  
AK003841  
AK011222  
Ppm1b  
Ppm1b  
Ppm1b  
Ppm1b  
Ppm1b  
AK003841  
AK011222  
Ppm1b  
Ppm1b  
Ppm1b  
Ppm1b  
Ppm1b  
1700106N22Rik  
1700106N22Rik  
AY589789  
AY589791  
AK053722  
AY590888  
Six3  
BC065087  
Six3  
Srbd1  
1700011E24Rik  
Calm2  
1700011E24Rik  
Calm2  
Fbxo11  
Fbxo11  
Nrxn1  
Nrxn1  
mKIAA0578  
mKIAA0578  
AK139280  
2610044O15Rik  
2610044O15Rik  
AK143926  
Cul2  
Cul2  
mKIAA4106  
Cul2  
Cul2  
mKIAA4106



Bambi  
Bambi  
Fzd8  
Rock1  
Rock1  
AK220484  
AK220484  
Abhd3  
Mib1  
Mib1  
Rbbp8  
Rbbp8  
Rbbp8  
Rbbp8  
Lama3B  
lama3  
2810439F02Rik  
Osopl1a  
Osopl1a  
Osopl1a  
Osopl1a  
Osopl1a  
Orp1  
Zfp521  
Zfp521  
AK012135  
Gm944  
Gm944  
Nol4  
Nol4  
Mapre2  
Mapre2  
Mapre2  
AK088734  
AK088914  
Zfp191  
Zfp191  
2700062C07Rik  
BC021395  
Bruno4  
Bruno4  
Bruno4  
Bruno4  
Bruno4  
Bruno4  
Slc25a46  
Slc25a46  
Sap130  
Sap130  
Sap130  
Sap130  
Sap130  
Sap130  
Sap130  
Sap130  
Wdr33  
Wdr33  
wdc146  
Wdr33  
Wdr33  
Wdr33  
AK043919  
Bin1  
Wdr36  
Wdr36  
Wdr36  
Wdr36  
D0H4S114  
D0H4S114  
Epb4.1l4a  
Epb4.1l4a  
Epb4.1l4a  
Epb4.1l4a  
Brd8  
Brd8  
Brd8  
Kif20a  
BC094408  
AK216043  
Jmjd1b  
Jmjd1b  
Jmjd1b  
Jmjd1b  
Reep2  
Reep2  
Etf1  
Etf1  
Hspa9  
AK088959  
AK080350  
Matr3  
Matr3  
mmu-mir-1949  
AK088959  
AK080350  
Matr3  
Matr3  
mmu-mir-1949  
2010001M09Rik  
5133400G04Rik  
5133400G04Rik  
Pura  
Pura  
0610010O12Rik  
0610010O12Rik  
0610010O12Rik  
0610010O12Rik  
Hbegf  
Hbegf  
Slc4a9  
Slc4a9  
Cd14  
Tmco6  
Tmco6  
Tmco6  
Ik  
Cd14  
Ndufa2  
Ik  
Wdr55  
Pcdha4  
Slc25a2  
Taf7  
AK149307  
Pcdhga1  
Diap1  
Diap1  
Pcdh1  
Pcdh1  
AK050707  
AK039796  
0610009O20Rik  
0610009O20Rik  
0610009O20Rik  
Lars  
Lars  
Rbm27  
Pou4f3  
Kcnn2  
Kcnn2  
Kcnn2  
Kcnn2  
Trim36  
Fem1c  
Fem1c  
Fem1c  
Sema6a

Sema6a  
Sema6a  
Sema6a  
Sema6a  
Sema6a  
Tnfaip8  
AK021048  
AK043286  
AK046742  
Tnfaip8  
Sncaip  
Sncaip  
Sncaip  
Sncaip  
Snx24  
Snx24  
Prdm6  
Csnk1g3  
Zfp608  
mKIAA1281  
Zfp608  
Zfp608  
Zfp608  
mKIAA1281  
Zfp608  
AK155149  
AK163160  
Zfp608  
mKIAA1281  
Zfp608  
AK155149  
AK163160  
Megf10  
Megf10  
Slc12a2  
Rbm22  
Rbm22  
Camk2a  
Camk2a  
Csnk1a1  
Csnk1a1  
Csnk1a1  
Csnk1a1  
Csnk1a1  
Csnk1a1  
Csnk1a1  
Afap1l1  
Txnl1  
Txnl1  
Wdr7  
Wdr7  
Wdr7  
Wdr7  
Wdr7  
BC048666  
St8sia3  
St8sia3  
Onecut2  
Onecut2  
Onecut2  
Nedd4l  
Sec11c  
Impa2  
AK078979  
Seh1l  
Seh1l  
AK016077  
AK078979  
Seh1l  
Seh1l  
AK016077  
AK016077  
AK158414  
AK016077  
AK158414  
Tcf4  
Mapk4  
Mapk4  
AK036329  
Myo5b  
Myo5b  
Lipg  
Lipg  
Rpl17  
BC031181  
BC031181  
Smad7  
Smad7  
Smad7  
Ccgc5  
Ccgc5  
Atp5a1  
Pstpip2  
Pstpip2  
Pstpip2  
Setbp1  
Nfatc1  
Nfatc1  
Nfatc1  
Sall3  
Sall3  
Sall3  
AK015395  
Zfp516  
Zfp516  
Tshz1  
Tshz1  
Zadh2  
Zfp407  
B230399E16Rik  
Cpt1a  
Suv420h1  
Suv420h1  
Suv420h1  
Suv420h1  
Suv420h1  
Chka  
Chka  
Chka  
Chka  
Chka  
Chka  
Chka  
Chka  
Chka  
Aldh3b1  
Unc93b1  
Unc93b1  
Unc93b1  
Aip  
Aip  
Cabp4  
Gpr152  
Coro1b  
AK184225

Ptprcap  
Cabp4  
Coro1b  
Ptprcap  
Rad9  
Rad9  
Clcf1  
Clcf1  
Pold4  
Pold4  
Pold4  
Pold4  
Ssh3  
mSSH-3L  
Ankrd13d  
Fbxl11  
Fbxl11  
Rhod  
Rhod  
Syt12  
Gm960  
Spcb3  
Spcb3  
Rbm14  
Rbm4  
Rbm4b  
Rbm4  
Rbm4b  
Rbm14  
Rbm4  
Rbm4b  
Rbm4  
Rbm4b  
Rbm14  
Rbm14  
Npas4  
Pacs1  
Pacs1  
Pacs1  
Sf3b2  
Sf3b2  
Sf3b2  
Gal3st3  
Mus81  
Mus81  
Cfl1  
Ehbp1l1  
Ehbp1l1  
Mtvr2  
C184  
Sssca1  
Sssca1  
Ltbp3  
Ltbp3  
Ltbp-3  
Ehbp1l1  
Ehbp1l1  
Mtvr2  
C184  
Sssca1  
Sssca1  
Ltbp3  
Ltbp3  
Ltbp-3  
AK019083  
AK019083  
AK019083  
AK019083  
Tigd3  
Tigd3  
Gja10  
Dpf2  
Dpf2  
Dpf2  
Tigd3  
Tigd3  
Gja10  
Dpf2  
Dpf2  
Dpf2  
Tm7sf2  
Tm7sf2  
Tm7sf2  
1110014N23Rik  
1110014N23Rik  
1110014N23Rik  
Zfp1  
Cdca5  
Cdca5  
BC049760  
Ppp2r5b  
Atg2a  
Atg2a  
mKIAA0404  
AK149321  
Ehd1  
AK149321  
Ehd1  
Nrxn2  
Rps6ka4  
Ccgc88b  
Stip1  
Stip1  
MacroD1  
Cox8a  
Nat11  
Nat11  
Nat11  
Mark2  
Mark2  
AI846148  
AI846148  
AK018996  
Rtn3  
AK043844  
5730596K20Rik  
Rtn3  
AK043844  
5730596K20Rik  
Rtn3  
5730596K20Rik  
Mta2  
Tut1  
Tut1  
Eef1g  
Tut1  
Eef1g  
Ahnak  
Ahnak  
Rab3il1  
Rab3il1  
Rab3il1  
Fads2  
Fads2  
Dagla  
Nsddr

Syt7  
0610038F07Rik  
0610038F07Rik  
5730453116Rik  
5730453116Rik  
5730453116Rik  
5730453116Rik  
Tmem138  
Tmem138  
Cybasc3  
Cybasc3  
Cybasc3  
Cybasc3  
Tmem132a  
Tmem132a  
Tmem109  
Tmem132a  
Tmem132a  
Tmem109  
Prpf19  
Stx3  
Stx3  
AK044380  
Zfp91-cntf  
Zfp91  
Lpxn  
Psat1  
Psat1  
Psat1  
Vps13a  
Vps13a  
Foxb2  
Foxb2  
Rorb  
Rorb  
Gda  
Gda  
AK019124  
Klf9  
mmu-mir-1192  
AK019124  
Klf9  
mmu-mir-1192  
AK019124  
Klf9  
mmu-mir-1192  
Tjp2  
Pip5k1b  
2900009I07Rik  
Pip5k1b  
2900009I07Rik  
Pip5k1b  
Dmrt3  
Smarca2  
Smarca2  
Smarca2  
Rfx3  
Rfx3  
Rfx3  
Jak2  
Ermp1  
Ermp1  
Kiaa1815  
ENSMUSG00000048936  
Prkg1  
Prkg1  
Asah2  
Asah2  
Asah2  
Asah2  
Minpp1  
Minpp1  
Pten  
Pten  
Pten  
Pten  
Pcgf5  
Pcgf5  
Pcgf5  
Hectd2  
Hectd2  
Hectd2  
Hectd2  
Hectd2  
Hectd2  
Tnks2  
Tnks2  
Tnks2  
Kif11  
Exoc6  
Fer1l3  
Fer1l3  
AK153534  
Cep55  
Cep55  
Cep55  
Cyp2c69  
Pdlim1  
Clim1  
Sorbs1  
Sorbs1  
Sorbs1  
Tm9sf3  
Tm9sf3  
Arhgap19  
Mms19  
Mms19  
Mms19  
Mms19  
Ubt1d1  
BC023055  
BC023055  
Pi4k2a  
Pi4k2a  
Avpi1  
Marveld1  
LOC545291  
Nkx2-3  
Nkx2-3  
Dnmbp  
Dnmbp  
AK076939  
Cwf19l1  
Cwf19l1  
Scd2  
Scd2  
Scd1  
Scd1  
Wnt8b  
Sec31b  
Ndufb8  
Ndufb8  
Hif1an  
Hif1an  
Pax2  
Pax2  
Pax2  
Pax2  
mKIAA4123  
Btrc  
Btrc  
mKIAA4123  
Btrc  
Btrc  
mKIAA4123  
Btrc  
Btrc  
Poll  
5330431N19Rik



Cacnb2  
Plxdc2  
Nebl  
AK044329  
AK045818  
AK044329  
AK045818  
AK044329  
Mllt10  
Mllt10  
AK044329  
2810030E01Rik  
Mllt10  
Mllt10  
mAF10  
Mllt10  
Mllt10  
AK044329  
2810030E01Rik  
Mllt10  
Mllt10  
mAF10  
Mllt10  
Mllt10  
Bmi1  
Bmi1  
BC061194  
Arhgap21  
Arhgap21  
Arhgap21  
4933434I06Rik  
Thns1  
Thns1  
Gad2  
Gad2  
Gad2  
Gad2  
Gad2  
Gad2  
Acbd5  
Acbd5  
Mastl  
Mastl  
Yme11  
Yme11  
Mastl  
Mastl  
Yme11  
Yme11  
Ehmt1  
Ehmt1  
glp  
Ehmt1  
Ehmt1  
glp  
Wdr85  
Wdr85  
Pnpla7  
Pnpla7  
Pnpla7  
Nrarp  
Traf2  
Traf2  
Edf1  
B230208H17Rik  
B230208H17Rik  
B230208H17Rik  
4921530D09Rik  
AK039020  
Tmem141  
Tmem141  
Bmyc  
Sec16a  
Sec16a  
Sec16a  
AK075572  
Notch1  
Notch1  
Agpat2  
Agpat2  
Agpat2  
AK011283  
AK030770  
Wdr5  
Vav2  
BC094334  
Wdr5  
Vav2  
BC094334  
Wdr5  
Vav2  
BC094334  
BC050122  
Barhl1  
Barhl1  
1700101E01Rik  
Ttf1  
Urm1  
Spna2  
Wdr34  
AK031561  
Set  
Set  
Pkn3  
Pkn3  
Pkn3  
Dolpp1  
Ier5l  
Ier5l  
mmu-mir-3089  
mmu-mir-3089  
mmu-mir-3089  
Tor1a  
BC005624  
Usp20  
Usp20  
Gpr107  
Gpr107  
Fubp3  
Fubp3  
Fibcd1  
A130092J06Rik  
A130092J06Rik  
Ppapdc3  
5830434P21Rik  
mKIAA0515  
5830434P21Rik  
mKIAA0515  
5830434P21Rik  
mKIAA0515  
mKIAA0515  
C230093N12Rik  
C230093N12Rik  
Stxbp1  
Stxbp1  
Stxbp1  
9130404D14Rik  
Lrsam1  
Lrsam1  
Rpl12  
Pbx3  
Mapkap1  
Mapkap1  
Mapkap1  
Gapvd1  
Gapvd1  
Hspa5  
Hspa5  
Rabepk

Rabepk  
AK019757  
Pdcl  
Pdcl  
Rc3h2  
Zbtb6  
Zbtb6  
Zbtb26  
Zbtb26  
Rabgap1  
Rabgap1  
Zbtb6  
Zbtb26  
Zbtb26  
Rabgap1  
Rabgap1  
Rabgap1  
Rabgap1  
Rabgap1  
Strbp  
Gpr21  
Strbp  
Strbp  
Strbp  
Strbp  
Crb2  
Crb2  
Lhx2  
Lhx2  
Lhx2  
Lhx2  
Psmb7  
Psmb7  
Nr5a1  
Nr5a1  
ELP  
Nr6a1  
Olfml2a  
Nr6a1  
Olfml2a  
Nr6a1  
Olfml2a  
Lrp1b  
Lrp1b  
Lrp1b  
Lrp1b  
Gtdc1  
Orc4l  
MuORC4  
Orc4l  
Mbd5  
Kif5c  
Rnd3  
Rnd3  
Rnd3  
Rnd3  
Stam2  
Stam2  
Stam2  
Prpf40a  
Prpf40a  
FBP11  
Arl6ip6  
Arl6ip6  
Nr4a2  
Nr4a2  
BC062650  
Pkp4  
Pkp4  
Tanc1  
Tanc1  
Tanc1  
Tanc1  
Baz2b  
Baz2b  
Baz2b  
Baz2b  
AK166079

Mar-07  
Mar-07

Tank  
Tank  
Tank  
Ifih1  
Ifih1  
Ifih1  
Gca  
Fign  
Stk39  
Stk39  
4930578N16Rik  
Phospho2  
Phospho2  
Phospho2  
Klhl23  
Mettl5  
Mettl5  
Zfp650  
Zfp650  
Zfp650  
Dync1i2  
Dncic2  
Dync1i2  
Itga6  
Itga6  
Cdca7  
Ola1  
Chrna1  
Atf2  
Atf2  
Atf2  
Atf2  
Hoxd10  
BC060302  
Hoxd9  
Hoxd8  
Hoxd3  
Hoxd3  
AK144266  
Hoxd1  
Hnrpa3  
Hnrpa3  
Agps  
Agps  
Zfp533  
Ssfa2  
Ssfa2  
Ssfa2  
Itgav  
Itgav  
Itgav  
Itgav  
Ctnnd1  
Ctnnd1  
Ctnnd1  
Ctnnd1  
Zdhhc5  
Clp1  
Ypel4  
Clp1  
mmu-mir-130a  
P2rx3  
AK019679  
Ssrp1  
Ssrp1  
Tnks1bp1  
mKIAA1741  
BC027685  
Agtrl1

Ptprj  
Nup160  
Gtl-13  
Nup160  
Nup160  
Gtl-13  
Nup160  
Gtl-13  
Nup160  
Nup160  
Gtl-13  
Nup160  
Gtl-13  
Nup160  
Gtl-13  
Nup160  
Gtl-13  
Mtch2  
Mtch2  
Mtch2  
Mtch2  
Mtch2  
Mtch2  
Mtch2  
Mtch2  
Mtch2  
AK020549  
Slc39a13  
Madd  
mKIAA0358  
Madd  
Madd  
Nr1h3  
Nr1h3  
Nr1h3  
Acp2  
1110051M20Rik  
1110051M20Rik  
Lrp4  
Lrp4  
Lrp4  
Lrp4  
mKIAA0097  
Ckap5  
mKIAA0097  
Ckap5  
F2  
Zfp408  
Arhgap1  
Arhgap1  
F2  
Zfp408  
Arhgap1  
Arhgap1  
D2Ert391e  
D030051N19Rik  
D030051N19Rik  
D030051N19Rik  
D030051N19Rik  
D030051N19Rik  
D030051N19Rik  
AK039132  
Phf21a  
Phf21a  
mmu-mir-1955  
Phf21a  
Phf21a  
mmu-mir-1955  
Phf21a  
Phf21a  
mmu-mir-1955  
Phf21a  
Phf21a  
mmu-mir-1955  
Phf21a  
Phf21a  
Gylt1b  
Gylt1b  
Gylt1b  
Gylt1b  
Pex16  
Pex16  
1700029115Rik  
Trp53i11  
C230071H18Rik  
Ext2  
Ext2  
Ext2  
AK140370  
AK089118  
mmu-mir-670  
Lrrc4c  
Lrrc4c  
B230118H07Rik  
B230118H07Rik  
B230118H07Rik  
Rag2  
Traf6  
Traf6  
2600010E01Rik  
Trim44  
Pdhx  
Pdhx  
Apip  
Caprin1  
Caprin1  
Caprin1  
Hipk3  
Prrg4  
Prrg4  
AK165089  
Wt1  
Wt1  
NR\_002867  
Pax6  
AK044354  
AK080416  
Pax6  
AK047243  
Pax6  
Pax6  
Dph4  
AK163667  
BC048594  
Mpped2  
BC020182  
Mpped2  
Bdnf  
Bdnf  
Bdnf  
Bdnf  
Bdnf  
Bdnf  
Bdnf  
Agpat7  
Agpat7  
Aven  
Scg5  
Arhgap11a  
Arhgap11a  
AK135429  
BC052040  
Meis2  
Mrg1  
Mrg1  
Meis2  
meis2a  
AK144367  
AK144485



Meis2  
Mrg1  
Mrg1  
Meis2  
meis2a  
AK012325  
AK144367  
AK144485  
Meis2  
Mrg1  
Mrg1  
Meis2  
meis2a  
AK012325  
AK144367  
AK144485  
Bmf  
Bmf  
AK145129  
Plcb2  
Plcb2  
BC026434  
D2Ertd750e  
Bahd1  
Rad51  
Rad51  
Rad51  
Rad51  
1200015F23Rik  
Gchfr  
OTTMUSG00000015762  
Ppp1r14d  
Spint1  
Spint1  
Rhov  
Vps18  
Vps18  
Vps18  
Rhov  
Vps18  
Vps18  
Vps18  
Vps18  
AK039958  
Dll4  
Inoc1  
Inoc1  
Exdl1  
Sid470  
1500003O03Rik  
Exdl1  
Sid470  
1500003O03Rik  
Ndufaf1  
Ndufaf1  
cbp82  
Itpka  
Itpka  
Mga  
Ehd4  
Tmem87a  
Tmem87a  
Tmem87a  
mFLJ00088  
Ganc  
Ganc  
Capn3  
Ganc  
Ttbk2  
Ttbk2  
AK015969  
AK006022  
Trp53bp1  
Trp53bp1  
Trp53bp1  
53BP1  
Mtap1a  
Catsper2  
Catsper2  
Catsper2  
Pdia3  
Catsper2  
Catsper2  
Catsper2  
Pdia3  
Eil3  
Serf2  
2310003F16Rik  
Eil3  
Serf2  
LOC574418  
2310003F16Rik  
Mfap1a  
Wdr76  
Wdr76  
Mageb3  
Ctdspl2  
Ctdspl2  
Ctdspl2  
Mageb3  
Ctdspl2  
Ctdspl2  
Ctdspl2  
Eif3j  
Eif3j  
Shf  
AK016335  
Pldn  
pa  
Shc4  
Shc4  
Trpm7  
ChaK  
2010106G01Rik  
Ap4e1  
Blvra  
Blvra  
Blvra  
Adra2b  
Kcnip3  
DREAM/calsenilin/KCHIP3  
Kcnip3  
DREAM/calsenilin/KCHIP3  
Kcnip3  
DREAM/calsenilin/KCHIP3  
Prom2  
Nphp1  
BC048556  
Acox1  
Snrpb  
Tmc2  
Idh3b  
Ebf4  
O/E-4S  
Ebf4  
O/E-4S  
Adra1d  
AK019738  
Prnp  
Prnd  
Slc23a2  
Slc23a2  
Slc23a2  
Slc23a2  
Chgb  
Trmt6  
Trm6  
Mcm8  
Pak7  
Pak7

Jag1  
Snx5  
Snx5  
8430406107Rik  
8430406107Rik  
Rbbp9  
Sec23b  
Sec23b  
Gm561  
Dtd1  
Dtd1  
Dtd1  
Insm1  
Gm114  
Xrn2  
Xrn2  
Xrn2  
Xrn2  
Xrn2  
Xrn2  
Xrn2  
Cst3  
Snph  
Snph  
Psmf1  
Psmf1  
Psmf1  
Psmf1  
AK006186  
Tcf15  
Rbck1  
Rbck1  
AY512942  
Rbck1  
Rbck1  
Trib3  
AY512942  
Sox12  
Zcchc3  
6820408C15Rik  
6820408C15Rik  
AK006531  
Hm13  
H13  
H13  
Mcts2  
Id1  
Cox4i2  
Cox4i2  
Cox4i2  
Cox4i2  
Cox4i2  
Cox4i2  
Bcl2l1  
Bcl2l1  
Bcl2l1  
Bcl2l1  
Bcl2l1  
Tpx2  
Tpx2  
Bcl2l1  
Bcl2l1  
Bcl2l1  
Bcl2l1  
Bcl2l1  
Tpx2  
Tpx2  
Fkh18  
Pdr1  
Xkr7  
Tspyl3  
Plagl2  
Plagl2  
Pofut1  
Pofut1  
Pofut1  
AK010870  
Asxl1  
8430427H17Rik  
8430427H17Rik  
8430427H17Rik  
8430427H17Rik  
8430427H17Rik  
Commd7  
Commd7  
Commd7  
Dnmt3b  
Commd7  
Commd7  
Commd7  
Dnmt3b  
Cdk5rap1  
Cdk5rap1  
Apba2bp  
1700003F12Rik  
Pxmp4  
AK145231  
Zfp341  
Raly  
Raly  
Raly  
Raly  
Ggtl3  
Ggtl3  
Acss2  
Acss2  
Acss2  
Acss2  
AK158030  
Eif6  
AK158030  
Eif6  
Uqcc  
Uqcc  
Uqcc  
Uqcc  
mKIAA0338  
mKIAA0338  
Epb4.1l1  
Epb4.1l1  
Dlgap4  
AK015092  
Dlgap4  
Dlgap4  
Rbl1  
Rbl1  
Rbl1  
AK012418  
4922505G16Rik  
Rpn2  
Ghrh  
Ghrh  
Manbal  
Blcap  
2610036D13Rik  
2610036D13Rik  
Zhx3  
Zhx3  
Lpin3  
Lpin3  
Rp23-297j14.5  
3230401D17Rik  
Gdap1l1  
Gdap1l1  
Gdap1l1  
Serinc3  
Pkig  
Pkig  
AK043662  
Wfdc2

AK015392  
F730014I05Rik  
BC060988  
Zfp335  
AK141411  
Slc12a5  
Cdh22  
Slc13a3  
Slc13a3  
Slc2a10  
Prkcbp1  
Prkcbp1  
Prkcbp1  
Prkcbp1  
mKIAA1125  
mKIAA1125  
Sulf2  
Sulf2  
Sulf2  
Sulf2  
Arfgef2  
Cse1l  
Stau1  
AK041781  
Ddx27  
Ddx27  
Kcnb1  
Kcnb1  
AY672066  
AK003793  
NHE8  
Slc9a8  
Slc9a8  
Ube2v1  
Ptpn1  
2310033K02Rik  
AK009597  
AK027991  
Adnp  
Adnp  
Adnp  
Adnp  
Tshz2  
Tshz2  
Cyp24a1  
Pfdn4  
Pfdn4  
Dok5  
Tcfap2c  
Tcfap2c  
Tcfap2c  
Tcfap2c  
AK006546  
AK006104  
AK029171  
AK164611  
AK080176  
AK161459  
AK170078  
AK046224  
Stx16  
Stx16  
Taf4a  
AK014955  
Psm7  
Ss18l1  
Gtpbp5  
BC066135  
BC066135  
Ythdf1  
Birc7  
Arfrp1  
Arfrp1  
Zgpat  
Zgpat  
Lime1  
Lime1  
AK082896  
Polr3k  
Polr3k  
AK012506  
Zfhx4  
Tpd52  
Aadacl1  
Evi1  
evi-1  
Evi1  
Evi1  
Evi1  
Evi1  
AK145113  
Evi1  
evi-1  
Evi1  
Evi1  
Evi1  
Evi1  
AK145113  
Evi1  
evi-1  
Evi1  
Evi1  
Evi1  
AK145113  
Evi1  
Mds1  
Arpm1  
Mynn  
Phc3  
Phc3  
Phc3  
Prkci  
Skil  
Skil  
Usp13  
Pex2  
Pex2  
Pex2  
AK029638  
AK153849  
Nudt6  
Nudt6  
Nudt6  
Spata5  
Fat4  
Fat4  
AK078307  
3110057012Rik  
3110057012Rik  
3110057012Rik  
AK012035  
Pcdh10  
Pcdh10  
Pcdh10  
Elf2  
Elf2  
Elf2  
Elf2  
ELF2  
AK017883  
Elf2  
Elf2  
Elf2  
ELF2  
AK042136  
Setd7  
AK017144  
Setd7

AK017144  
Setd7  
AK017144  
AK145396  
AK145396  
Foxo1  
Lhfp  
Dclk1  
Dclk1  
Dclk1  
Dclk1  
Nbea  
Lyst2  
D3Ucla1  
Eif2a  
Eif2a  
Eif2a  
Siah2  
AK016388  
Med12l  
Med12l  
Med12l  
4631416L12Rik  
Mme  
Mme  
Mme  
Mme  
AK144610  
Schip1  
Schip1  
Schip1  
Schip1  
Schip1  
Kpna4  
BC062821  
Ppm1l  
Etfdh  
Etfdh  
Etfdh  
Etfdh  
4930579G24Rik  
Tmem144  
Tmem144  
Pdgfc  
Pdgfc  
Mtap9  
Mtap9  
Mtap9  
Mtap9  
Mtap9  
Mtap9  
Mtap9  
AK137033  
Trim2  
Trim2  
Trim2  
Trim2  
Trim2  
Trim2  
Arfip1  
Arfip1  
Tigd4  
Arfip1  
Fbxw6  
SH3d19  
Lrba  
Lba  
Lrba  
Lrba  
Lrba  
Lrba  
Lrba  
Lrba  
Mab21l2  
Lrba  
Lrba  
Lrba  
Mab21l2  
Lrba  
Lrba  
Lrba  
Mab21l2  
Kirrel  
Kirrel  
Kirrel  
Kirrel  
Kirrel  
Kirrel  
Kirrel  
PE1  
Etv3  
PE1  
Nes  
Bcan  
Bcan  
Mef2d  
Mef2d  
AK007191  
AK008852  
AK141565  
AK140632  
mmu-mir-3093  
AK141565  
AK140632  
mmu-mir-3093  
mmu-mir-9-1  
1700021C14Rik  
1700021C14Rik  
Cct3  
Cct3  
Cct3  
Tmem79  
Tmem79  
Smg5  
Smg5  
Lmna  
Lmna  
Lmna  
Arhgef2  
Arhgef2  
Arhgef2  
Arhgef2  
Arhgef2  
mKIAA0651  
Arhgef2  
Arhgef2  
Arhgef2  
Arhgef2  
Arhgef2  
Arhgef2  
mKIAA0651  
Arhgef2  
Arhgef2  
Arhgef2  
Arhgef2  
Arhgef2  
mKIAA0651  
AK078352

2810403A07Rik  
2810403A07Rik  
2810403A07Rik  
AK078352  
2810403A07Rik  
2810403A07Rik  
2810403A07Rik  
AK078352  
2810403A07Rik  
2810403A07Rik  
2810403A07Rik  
Dap3  
Ash1l  
Ash1l  
Hcn3  
AK177718  
Clk2  
Clk2  
Scamp3  
Gba  
Thbs3  
Mtx1  
Thbs3  
Muc1  
Krtcap2  
mmu-mir-92b  
Efna3  
AK140090  
AK132440  
Efna4  
AK132440  
Adam15  
Adam15  
Adam15  
Dcst1  
Zbtb7b  
Zbtb7b  
Zbtb7b  
AK161599  
AK136654  
AK053703  
Flad1  
Flad1  
Flad1  
Lenep  
Cks1b  
Shc1  
Shc1  
Pygo2  
Pygo2  
Pygo2  
Pbxip1  
AK053703  
Flad1  
Flad1  
Flad1  
Lenep  
Cks1b  
Shc1  
Shc1  
Pygo2  
Pygo2  
Pygo2  
Pbxip1  
AK053703  
Flad1  
Flad1  
Flad1  
Lenep  
Cks1b  
Shc1  
Shc1  
Pygo2  
Pygo2  
Pygo2  
Pbxip1  
AK053703  
Flad1  
Flad1  
Flad1  
Lenep  
Cks1b  
Shc1  
Shc1  
Pygo2  
Pygo2  
Pygo2  
Pbxip1  
AK053703  
Flad1  
Flad1  
Flad1  
Lenep  
Cks1b  
Shc1  
Shc1  
Pygo2  
Pygo2  
Pygo2  
Pbxip1  
AK053703  
Flad1  
Flad1  
Flad1  
Lenep  
Cks1b  
Shc1  
Shc1  
Pygo2  
Pygo2  
Pygo2  
Pbxip1  
AK053703  
Flad1  
Flad1  
Flad1  
Lenep  
Cks1b  
Shc1  
Shc1  
Pygo2  
Pygo2  
Pygo2  
Pbxip1  
AK053703  
Flad1  
Flad1  
Flad1  
Lenep  
Cks1b  
Shc1  
Shc1  
Pygo2  
Pygo2  
Pygo2  
Pbxip1  
Pmvk  
Pmvk  
Il6ra  
Atp8b2  
Atp8b2  
Hax1  
Ubp2l  
Ubp2l  
Ubp2l  
Ubp2l  
Tpm3  
Tpm3  
Tpm3  
Tpm3  
Tpm3

Tpm3  
Tpm3  
Tpm3  
Tpm3  
Tpm3  
Tpm3  
Tpm3  
Rps27  
Rab13  
Rab13  
Jtb  
Rps27  
Jtb  
Slc39a1  
Creb3l4  
Creb3l4  
Creb3l4  
Slc39a1  
Crtc2  
Crtc2  
Crtc2  
Dennd4b  
Dennd4b  
Dennd4b  
Creb3l4  
Creb3l4  
Creb3l4  
Slc39a1  
Crtc2  
Crtc2  
Crtc2  
Dennd4b  
Dennd4b  
Dennd4b  
Dennd4b  
Creb3l4  
Creb3l4  
Creb3l4  
Slc39a1  
Crtc2  
Crtc2  
Crtc2  
Dennd4b  
Dennd4b  
Dennd4b  
Gatad2b  
Npr1  
Ilf2  
Ilf2  
Ilf2  
Pogz  
Pogz  
Rfx5  
Rfx5  
Rfx5  
Rfx5  
Pi4kb  
AK042619  
AK042619  
Zfp687  
mKIAA1441  
Pip5k1a  
Pip5k1a  
Vps72  
Tmod4  
Tmod4  
Gabpb2  
Gabpb2  
AK020406  
Mllt11  
Cdc42se1  
Cdc42se1  
Gabpb2  
Gabpb2  
AK020406  
Mllt11  
Cdc42se1  
Cdc42se1  
Gabpb2  
Gabpb2  
AK020406  
Mllt11  
Cdc42se1  
Cdc42se1  
Gabpb2  
Gabpb2  
Mllt11  
Cdc42se1  
Cdc42se1  
Gabpb2  
Gabpb2  
Mllt11  
Cdc42se1  
Cdc42se1  
Prune  
4930504E06Rik  
4930504E06Rik  
4930504E06Rik  
4930504E06Rik  
4930504E06Rik  
Anxa9  
Anxa9  
AK144859  
Lass2  
Lass2  
Arnt  
Arnt  
Arnt  
Ctss  
Hormad1  
Hormad1  
Golp3l  
Golp3l  
Adamtsl4  
4930535B03Rik  
4930535B03Rik  
4930535B03Rik  
mKIAA0460  
Prpf3  
Prpf3  
Mrps21  
Mrps21  
AK044447  
BC028528  
BC028528  
Car14  
Car14  
BC028528  
BC028528  
Car14  
Car14  
BC028528  
BC028528  
Car14  
Car14  
Anp32e  
AK028005  
AK028005  
Otud7b  
Otud7b  
Otud7b  
Otud7b  
Hist2h4  
Hist2h3b

Hist2h2bb  
Hist2h4  
Hist2h3b  
Hist2h2bb  
Fcgr1  
Fcgr1  
AK135774  
AK135774  
AK145360  
AK135774  
AK145360  
AK135774  
AK145360  
AK135774  
AK145360  
AK135774  
AK145360  
BC107364  
AK143784  
Txnip  
AK052161  
AK143784  
Txnip  
AK052161  
AK143784  
AK052161  
Polr3gl  
Ankrd34  
AK032024  
NR\_003619  
Rbm8a  
Pex11b  
Pex11b  
Pex11b  
Pex11b  
Itga10  
Itga10  
Ankrd35  
Ankrd35  
Ankrd35  
Ankrd35  
Pias3  
Pias3  
Pias3  
Pias3  
Pias3  
Pias3  
Zfp364  
Gpr89  
Gpr89  
Acp6  
Acp6  
Bcl9  
Bcl9  
AK145276  
Chd1l  
Chd1l  
Fmo5  
Fmo5  
Fmo5  
Pde4dip  
Pde4dip  
Pde4dip  
Tbx15  
Ttf2  
Ttf2  
Slc22a15  
Slc22a15  
Csde1  
Csde1  
mKIAA0885  
Syt6  
Syt6  
Syt6  
Syt6  
Syt6  
Olfml3  
Olfml3  
AK031871  
Rsb1  
Rsb1  
Magi3  
Magi3  
Lrig2  
Lrig2  
7530404M11Rik  
Ppm1j  
Rhoc  
Mov10  
Mov10  
Mov10  
AK048523  
Wnt2b  
Rbm15  
Csf1  
Csf1  
Csf1  
Csf1  
Gstm1  
Gnai3  
Cyb561d1  
Cyb561d1  
Atxn7l2  
Syp12  
Cyb561d1  
Cyb561d1  
Atxn7l2  
Syp12  
Cyb561d1  
Cyb561d1  
Atxn7l2  
Syp12  
AK005839  
Psma5  
AK005839  
Psma5  
mKIAA0893  
Wdr47  
Gpsm2  
AK164420  
Stxbp3a  
Stxbp3a  
Prpf38b  
Prpf38b  
Vav3  
Vav3  
Ntng1  
Ntng1  
netrin-G1  
Ntng1  
Ntng1  
Ntng1  
AK053689  
Prmt6  
Prmt6  
Prmt6  
Prmt6  
Olfm3  
Slc30a7  
Extl2  
Extl2  
Slc30a7  
Extl2  
Extl2  
Cdc14a  
Cdc14a  
Rtcd1  
Rtcd1  
Dbt  
Snx7  
Arhgap29

Arhgap29  
Arhgap29  
Arhgap29  
Arhgap29  
Bcar3  
AK152002  
Pde5a  
Pde5a  
BC096391  
BC025067  
Camk2d  
Camk2d  
Camk2d  
mKIAA4163  
Camk2d  
Camk2d  
Ank2  
Ank2  
Ank2  
Ank2  
Neurog2  
Neurog2  
Pitx2  
Pitx2  
Pitx2  
Pitx2  
Pitx2  
Pitx2  
Pitx2  
Pitx2  
Elovl6  
FAE  
Elovl6  
Pla2g12a  
Pla2g12a  
Lef1  
BC051212  
Lef1  
Lef1  
Lef1  
Scye1  
A630047E20Rik  
A630047E20Rik  
Ppa2  
Ppa2  
Cisd2  
Cisd2  
AK015999  
Ube2d3  
Ube2d3  
Ube2d3  
Ube2d3  
Nfkb1  
Nfkb1  
H2afz  
Dnajib14  
Dnajib14  
Mttp  
Mttp  
Rg9mtd2  
Rnmtd2  
Rg9mtd2  
Unc5c  
Unc5c  
Unc5c  
Gbp1  
Gbp3  
Gbp3  
Gbp3  
Pkn2  
Pkn2  
Pkn2  
AK035466  
Lmo4  
Hs2st1

Sep-15

Clca5  
Clca5  
Odf2l  
Odf2l  
Cyr61  
Wdr63  
Mcoln3  
Mcoln3  
Mcoln2  
Mcoln2  
Edg7  
Bxdc5  
Bxdc5  
Lphn2  
Lphn2  
Lphn2  
Lphn2  
Semcap2  
Gipc2  
Dnajib4  
Dnajib4  
AK077587  
Fubp1  
Fubp1  
Fubp1  
Fubp1  
Fubp1  
Fubp1  
Lhx8  
AK142074  
Gpr177  
Gpr177  
Gpr177  
Gpr177  
Gpr177  
Gpr177  
Plekhh2  
AK080292  
Ccne2  
Ccne2  
Rbm35a  
Rbm35a  
Rbm35a  
Ppm2c  
Ppm2c  
AK007255  
AK005538  
Runx1t1  
Cbfa2t1h  
Runx1t1  
Cbfa2t1h  
Tmem55a  
Tmem55a  
mt3-mmp  
Mmp16  
mt3-mmp  
Mmp16  
Fam77D  
E130310K16Rik  
E130310K16Rik  
Fam77D



E130310K16Rik  
E130310K16Rik  
Prdm13  
DQ722851  
AK081407  
AK083021  
AK031964  
BC060111  
AK031964  
BC060111  
AK077040  
Coq3  
6230409E13Rik  
6230409E13Rik  
AK039117  
Pou3f2  
AK039117  
Pou3f2  
AK039117  
Pou3f2  
AK039117  
Pou3f2  
Fut9  
Epha7  
Epha7  
Epha7  
Map3k7  
Gja10  
Casp8ap2  
Casp8ap2  
Gja10  
Casp8ap2  
Casp8ap2  
Lym2  
Rragd  
Rragd  
Mobkl2b  
Mobkl2b  
Aptx  
AK139295  
Dnaja1  
B4galt1  
AK142614  
Bag1  
Chmp5  
Chmp5  
Nol6  
Ube2r2  
Ubap2  
Ubap2  
Wdr40a  
Cntfr  
Cntfr  
Cntfr  
2810432D09Rik  
Dctn3  
Arid3c  
Vcp  
Pigo  
Pigo  
Pigo  
Stoml2  
B230312A22Rik  
B230312A22Rik  
B230312A22Rik  
B230312A22Rik  
AK043958  
Stoml2  
B230312A22Rik  
B230312A22Rik  
B230312A22Rik  
B230312A22Rik  
AK043958  
Unc13b  
Unc13b  
Rusc2  
Rusc2  
mKIAA0375  
4833436C18Rik  
Tesk1  
Sit1  
NR\_001460  
LOC622404  
Car9  
Tln1  
mKIAA1027  
Creb3  
1110029E03Rik  
1110029E03Rik  
Gne  
Gne  
Gne  
Gne  
Gne  
Gne  
Zcchc7  
D4Wsu132e  
Zbtb5  
Zbtb5  
Polr1e  
Fbxo10  
Fbxo10  
Tdrd7  
Tdrd7  
Tdrd7  
BC057893  
BC057893  
AU014645  
AU014645  
AU014645  
BC057893  
BC057893  
AU014645  
AU014645  
AU014645  
Foxe1  
5830415F09Rik  
5830415F09Rik  
Trim14  
Trim14  
Trim14  
BC038520  
Nr4a3  
Nr4a3  
Nr4a3  
BC038520  
Nr4a3  
Nr4a3  
Nr4a3  
BC038520  
Nr4a3  
Nr4a3  
Nr4a3  
BC038520  
Nr4a3  
Nr4a3  
Nr4a3  
mKIAA4116  
mKIAA4116  
Rnf20  
Rnf20  
mKIAA1973  
mKIAA1973  
Abca1  
Slc44a1  
Slc44a1  
Zfp462  
Zfp462  
Akap2

Rod1  
Hsd12  
Hsd12  
Hsd12  
Hsd12  
1110054005Rik  
1110054005Rik  
Cdc26  
Cdc26  
Cdc26  
Cdc26  
Fkbp15  
Slc31a1  
Cdc26  
Cdc26  
Cdc26  
Cdc26  
Fkbp15  
Slc31a1  
Cdc26  
Cdc26  
Prpf4  
Hdhd3  
Alad  
Alad  
4933430117Rik  
Akna  
Akna  
Akna  
Whrn  
Whrn  
Jmjd2c  
Jmjd2c  
D4Bwg0951e  
Nfib  
Zdhhc21  
Gramp3  
Psp1  
Psp1  
Psp1  
4930473A06Rik  
4930473A06Rik  
AK029637  
4930473A06Rik  
4930473A06Rik  
AK029637  
Bnc2  
Bnc2  
Bnc2  
6230416J20Rik  
Dennd4c  
C87499  
Cdkn2a  
Cdkn2a  
AK148321  
Cdkn2a  
Cdkn2a  
AK148321  
Elavl2  
Elavl2  
Elavl2  
Elavl2  
Elavl2  
Elavl2  
Elavl2  
Elavl2  
Plaa  
Plaa  
Ift74  
E130114P18Rik  
Nfia  
E130114P18Rik  
Nfia  
AK047309  
Nfia  
Nfia  
Nfia  
Dock7  
Dock7  
Foxd3  
Cachd1  
Cachd1  
Cachd1  
Cachd1  
AK021368  
AK002929  
mmu-mir-101a  
SGIP1alpha  
Sgip1  
Dab1  
Ppap2b  
Pcsk9  
Ttc4  
Ttc4  
Ttc4  
AK134749  
Ssbp3  
Ssbp3  
Ssbp3  
Ssbp3  
Ssbp3  
Ssbp3  
AK164829  
Glis1  
AK164829  
Glis1  
Lrp8  
Lrp8  
Lrp8  
Lrp8  
Lrp8  
Lrp8  
Magoh  
0610037L13Rik

0610037L13Rik  
0610037L13Rik  
Scp2  
Zyg11a  
Zyg11b  
Zyg11b  
Zcchc11  
Zcchc11  
Zcchc11  
Prpf38a  
2410002M20Rik  
Orc1l  
Orc1l  
Prpf38a  
2410002M20Rik  
Orc1l  
Orc1l  
Prpf38a  
2410002M20Rik  
Orc1l  
Orc1l  
Nrd1  
AK138781  
Nrd1  
mmu-mir-761  
Osbp19  
AK019375  
Dmrta2  
4931433A01Rik  
4931433A01Rik  
2310026E23Rik  
OTTMUSG00000008561  
AK048089  
AK078937  
Foxd2  
AK048089  
AK078937  
Tal1  
Tal1  
Tal1  
Nsun4  
Uqcrh  
Lrrc41  
Lrrc41  
Rad54l  
Rad54l  
Rad54l  
Rad54l  
AK010894  
Pik3r3  
Pik3r3  
Pik3r3  
Ipp  
Akr1a4  
Akr1a4  
AK131819  
Prdx1  
AK131819  
Prdx1  
Mmachc  
0610037D15Rik  
0610037D15Rik  
Tesk2  
Mmachc  
Tesk2  
Mmachc  
Tesk2  
Ptch2  
9530048O09Rik  
9530048O09Rik  
4833401D15Rik  
4931406I20Rik  
Dmap1  
Slc6a9  
St3gal3  
St3gal3  
Ptpf  
Ptpf  
Med8  
Elov1  
Elov1  
Elov1  
Elov1  
Elov1  
AA415398  
Foxj3  
Foxj3  
Foxj3  
Kcnq4  
Ppie  
Nt5c1a  
Macf  
Macf  
Macf1  
Macf  
Macf  
Macf  
Macf  
Rragc  
AK160260  
Pou3f1  
Pou3f1  
Pou3f1  
Utp11l  
Fhl3  
Sf3a3  
Sf3a3  
AK134673  
Dnali1  
Snip1  
2310005N01Rik  
2310005N01Rik  
Stk40  
Stk40  
Thrap3  
Thrap3  
Thrap3  
Mtap7d1  
Mtap7d1  
Mtap7d1  
Trappc3  
Mtap7d1  
Mtap7d1  
Mtap7d1  
Trappc3  
Mtap7d1  
Mtap7d1  
Mtap7d1  
Trappc3  
Eif2c3  
Eif2c3  
Eif2c3  
Eif2c1  
Clspn  
Clspn  
Clspn

Tcfap2e  
Ncdn  
Ncdn  
AU040320  
AU040320  
AU040320  
AU040320  
AU040320  
AU040320  
AK019743  
Ibrdc3  
Rnf19b  
Hpcap  
Hpcap  
Hpcap  
Fndc5  
Hpcap  
Hpcap  
Hpcap  
Fndc5  
2410081M15Rik  
AK049295  
Tssk3  
Marcks1  
Marcks1  
Hdac1  
Hdac1  
Hdac1  
Lck  
Lck  
Lck  
Lck  
Hdac1  
Lck  
Lck  
Lck  
Lck  
Eif3i  
Eif3s2  
Iqcc  
Ccdc28b  
Ccdc28b  
AK031278  
Ccdc28b  
Khdrbs1  
Khdrbs1  
Khdrbs1  
Ptp4a2  
Ptp4a2  
Ptp4a2  
Ptp4a2  
Ptp4a2  
Ptp4a2  
AK005651  
AK005651  
AK005651  
Col16a1  
Col16a1  
Fabp3  
Pum1  
Pum1  
Pum1  
Laptm5  
Laptm5  
Laptm5  
Sfrs4  
Sfrs4  
Sfrs4  
Sfrs4  
Sfrs4  
Sfrs4  
Epb4.1  
Epb4.1  
Epb4.1  
Epb4.1  
Gmeb1  
Gmeb1  
Taf12  
Gmeb1  
Gmeb1  
NR\_002865  
Taf12  
Phactr4  
Med18  
Sesn2  
AK155592  
Sesn2  
AK155592  
Atpif1  
Dnajc8  
Eya3  
Ppp1r8  
Stx12  
Stx12  
Fgr  
Ahdc1  
Ahdc1  
Ahdc1  
Ahdc1  
Ahdc1  
Ahdc1  
Ahdc1  
Ahdc1  
D4Ertd196e  
Wdtd1  
Wdtd1  
Wdtd1  
Slc9a1  
2300002D11Rik  
Arid1a  
Dhdds  
Dhdds  
Lin28  
Extl1  
Extl1  
Pafah2  
Pafah2  
Pafah2  
Pafah2  
Pafah2  
Pafah2  
Ldlrap1  
Ldlrap1  
Rhd  
Rhd  
Rhd  
Rhd  
Tmem50a  
Tmem50a  
D4Wsu53e  
D4Wsu53e  
Syf2  
Tmem50a  
Tmem50a  
D4Wsu53e  
D4Wsu53e  
Syf2  
Syf2  
Clic4  
Clic4

Clic4  
Srrm1  
Srrm1  
Srrm1  
Npal3  
Npal3  
4930555121Rik  
4930555121Rik  
Grhl3  
nssr 1  
Fusip1  
Fusip1  
Fusip1  
nssr 1  
Pnrc2  
Hmgcl  
Gale  
Gale  
Lypla2  
Lypla2  
Lypla2  
Lypla2  
1110049F12Rik  
ld3  
ld3  
ld3  
ld3  
E2f2  
Tcea3  
Zfp46  
Ephb2  
Ephb2  
Ephb2  
Ephb2  
Ephb2  
Ephb2  
Ephb2  
C1qb  
C1qc  
C1qa  
Cdc42  
Cdc42  
Cdc42  
Hspg2  
Ldlrad2  
Usp48  
Usp48  
Usp48  
Usp48  
Sh2d5  
MmKIF17  
Kif17  
Kif17  
MmKIF17  
Sh2d5  
MmKIF17  
Kif17  
Kif17  
MmKIF17  
Camk2n1  
Camk2n1  
Tmco4  
Htr6  
Htr6  
Nbl1  
Pax7  
Pax7  
Rcc2  
Rcc2  
BC005803  
Padi1  
D4Ertd22e  
Fbxo42  
D4Ertd22e  
Fbxo42  
Arhgef19  
Clcnka  
Clcnka  
BC047062  
Clcnkb  
Hspb7  
Gm694  
Zbtb17  
Spen  
Spen  
Spen  
AK148126  
Spen  
Spen  
Spen  
AK148126  
Spen  
Spen  
Spen  
AK148126  
Spen  
Spen  
Spen  
AK148126  
Fblim1  
Fblim1  
AK131719  
Fblim1  
Fblim1  
AK131719  
Fblim1  
Fblim1  
Tmem82  
AK131719  
Tmem82  
Slc25a34  
Fblim1  
Fblim1  
Tmem82  
Tmem82  
Slc25a34  
Ddi2  
Tmem51  
AK154034  
AK158244  
9030409G11Rik  
9030409G11Rik  
mKIAA1026  
9030409G11Rik  
AK018156  
Pramef12  
2610109H07Rik  
Mad2l2  
Mad2l2  
Fbxo6  
Fbxo6  
Fbxo6  
Fbxo44  
Fbxo44  
Fbxo44  
Fbxo44  
Fbxo2  
Tardbp  
Tardbp  
Gm572  
Casz1  
Casz1  
Casz1  
Casz1  
Casz1  
Pex14  
Pex14  
Kif1b  
Kif1b

Ube4b  
Ube4b  
Clstn1  
D4Ert429e  
Spsb1  
H6pd  
H6pd  
Rere  
Thap3  
Phf13  
Phf13  
Klhl21  
Tnfrsf25  
Espn  
Espn  
Espn  
Espn  
Espn  
Prdm16  
5930403L14Rik  
AK083203  
Vwa1  
A230069A22Rik  
AK054201  
Mrpl20  
Dvl1  
Dvl1  
mKIAA4029  
Dvl1  
Cpsf3l  
Ttll10  
Ttll10  
Cdk6  
Cdk6  
mKIAA1386  
Ankib1  
Ankib1  
mKIAA1386  
Akap9  
Akap9  
Akap9  
Akap9  
Fzd1  
Pftk1  
Pftk1  
Pftk1  
Pftk1  
Steap2  
Steap2  
Steap2  
Rundc3b  
Dmtf1  
Dmtf1  
Dmtf1  
Dmtf1  
AK037159  
Sema3a  
Sema3a  
Sema3a  
Gnai1  
AK046351  
Ptpn12  
Fbxl13  
Fbxl13  
Armc10  
Armc10  
Dnajc2  
Dnajc2  
Dnajc2  
Dnajc2  
Psmc2  
Reln  
Reln  
Reln  
Srpk2  
Srpk2  
Srpk2  
Srpk2  
Srpk2  
Srpk2  
Kcnh2  
Nos3  
Gbx1  
Abcf2  
2010209O12Rik  
AK012891  
mmu-mir-671  
Abcf2  
2010209O12Rik  
AK012891  
mmu-mir-671  
Abcf2  
2010209O12Rik  
AK012891  
mmu-mir-671  
Smarcd3  
Smarcd3  
Nub1  
Rheb  
Mll3  
mKIAA1506  
Mll3  
AK149295  
Gm443  
Dpp6  
Dpp6  
Dpp6  
Dpp6  
Dpp6  
Dpp6  
Dpp6  
9630008K15Rik  
Cnpy1  
AK039125  
AK132123  
Gm444  
AK132123  
Gm444  
Hadha  
Hadha  
Hadhb  
Hadhb  
mmu-mir-1960  
Hadha  
Hadha  
Hadhb  
Hadhb  
mmu-mir-1960  
Hadha  
Hadha  
Hadhb  
Hadhb  
mmu-mir-1960  
D5Wsu178e  
mKIAA1724  
D5Wsu178e  
mKIAA1724  
4930471M23Rik  
Cenpa

Cenp-a  
Dpysl5  
Dpysl5  
Crmp5  
Agbl5  
9430057019Rik  
Agbl5  
Agbl5  
Agbl5  
Agbl5  
Agbl5  
2310016E02Rik  
Emilin1  
Emilin1  
Khk  
2310016E02Rik  
Emilin1  
Emilin1  
Khk  
Slc30a3  
Slc30a3  
Dnajc5g  
Slc30a3  
Slc30a3  
Dnajc5g  
Trim54  
Ucn  
Gtf3c2  
Gtf3c2  
Gtf3c2  
Gtf3c2  
Snx17  
Gtf3c2  
Gtf3c2  
Gtf3c2  
Gtf3c2  
Eif2b4  
Eif2b4  
Snx17  
Gtf3c2  
Gtf3c2  
Gtf3c2  
Eif2b4  
Eif2b4  
Snx17  
Fosl2  
Fosl2  
Yes1  
Yes1  
Pisd  
Ywhah  
Ctbp1  
Ctbp1  
CtBP1  
Slbp  
Slbp  
Tmem129  
Tmem129  
Tacc3  
Tacc3  
Tacc3  
Nol14  
Grk4  
Grk4  
Nol14  
Grk4  
Grk4  
Sorcs2  
Sorcs2  
AK144870  
Grpel1  
Msx1  
Stx18  
Stx18  
Drd5  
Wdr1  
Wdr1  
Hs3st1  
Hs3st1  
Rab28  
Rab28  
A230054D04Rik  
A230054D04Rik  
AK017756  
AK136254  
Gpr125  
Dhx15  
Dhx15  
AK163067  
AK050940  
AK079034  
Anapc4  
Rbpj  
Rbpj  
Rbpj  
Rbpj  
Stim2  
AK039574  
Pcdh7  
Pcdh7  
Pgm1  
Tbc1d1  
mKIAA1108  
Tbc1d1  
Klf3  
Klf3  
Klf3  
Klf3  
Klf3  
Klf3  
Klf3  
Klf3  
Pds5a  
AK006245  
B3bp  
B3bp  
Limch1  
Limch1  
mKIAA1102  
Limch1  
Phox2b  
Phox2b  
Tmem33  
Tmem33  
Tmem33  
Tmem33  
Atp8a1  
Gabbr1  
Tec  
Tec  
Tec  
Dcun1d4  
Dcun1d4  
Pdgfra  
Pdgfra  
Pdgfra  
Pdgfra  
Pdgfra  
Pdgfra  
Epha5  
Epha5  
Epha5  
Epha5  
Epha5  
Cenpc1  
Cenpc1

Cenpc1  
stap-1  
stap-1  
Stap1  
Rufy3  
Rufy3  
Rufy3  
Rufy3  
Cox18  
Ankrd17  
Ankrd17  
1110019K23Rik  
Cdkl2  
Cdkl2  
Cdkl2  
Nup54  
Nup54  
Scarb2  
Ankrd56

Sep-11  
Sep-11  
Sep-11  
Sep-11  
Sep-11  
Sep-11  
Sep-11  
Sep-11

Ccni  
Ccni  
Cnot6l  
Cnot6l  
Cnot6l  
Prdm8  
Bmp3  
Bmp3  
Hnrpd  
Hnrpd  
Hnrpd  
Hnrpd  
Enoph1  
Enoph1  
Hnrpd  
Hnrpd  
Hnrpd  
Enoph1  
Enoph1  
Al461788  
Lin54  
mKIAA2037  
Al461788  
Cops4  
Cops4  
Ccdc98  
Ccdc98  
AK133807  
A230097K15Rik  
A230097K15Rik  
Nkx6-1  
Nkx6-1  
Arhgap24  
Arhgap24  
Arhgap24  
Ptpn13  
Ptpn13  
Ptpn13  
Aff1  
Aff1  
Aff1  
Aff1  
Aff1  
Nudt9  
Dspp  
Dspp  
Barhl2  
Cdc7  
Cdc7  
Tgfbr3  
Tgfbr3  
Tgfbr3  
Tgfbr3  
Brdt  
Fsg3  
Glmn  
Rpap2  
Rpap2  
Rpap2  
Mtf2  
Mtf2  
Mtf2  
Mtf2  
Tmed5  
Tmed5  
Ccdc18  
Ccdc18  
Tmed5  
Tmed5  
Ccdc18  
Ccdc18  
Tmed5  
Tmed5  
Ccdc18  
Ccdc18  
Tmed5  
Tmed5  
Ccdc18  
Ccdc18  
Atp5k  
AK142681  
Gtpbp6  
A830023I12Rik  
A830023I12Rik  
Tpst2  
Tpst2  
Myo18b  
AK085912  
AK085912  
Adrbk2  
Adrbk2  
Gm854  
Wscd2  
Wscd2  
Foxn4  
BC057022  
Sppl3  
Sppl3  
Pop5  
Pop5  
Rnf10  
Rnf10  
Coq5  
Coq5  
Dynll1  
Dynll1  
Dynll1  
Sfrs9  
Msi1  
Msi1  
Sirt4  
Sirt4  
Pxn  
Ccdc60  
Hspb8  
1500001A10Rik  
1500001A10Rik  
AK050700  
Wsb2  
Wsb2  
Wsb2



Wsb2  
Ksr2  
Nos1  
Nos1  
Fbxw8  
Fbxw8  
Hrk  
Fbxw8  
Fbxw8  
Hrk  
Thrap2  
Med13l  
Med13l  
Thrap2  
Med13l  
Med13l  
Med13l  
Tbx3  
Tbx3  
Tbx3  
Tbx3  
Rbm19  
Lhx5  
Lhx5  
1110008J03Rik  
Ddx54  
Acad10  
Acad10  
Brap  
Brap  
Atxn2  
Sh2b3  
A230106M15Rik  
Cutl2  
Ppp1cc  
Ppp1cc  
Rad9b  
Rad9b  
Vps29  
Atpbd1c  
Anapc7  
Anapc7  
Cdv1R  
Ifft81  
Cdv1R  
Ifft81  
Fbxl10  
Fbxl10  
Fbxl10  
mKIAA3014  
AK079939  
Tmem120b  
Rhof  
Rhof  
Setd1b  
Setd1b  
Rhof  
Rhof  
Setd1b  
Setd1b  
Rhof  
Rhof  
Setd1b  
Setd1b  
Psmc9  
AK030281  
Bcl7a  
Bcl7a  
Bcl7a  
Bcl7a  
Vps33a  
Zcchc8  
Zcchc8  
Rsrc2  
Rsrc2  
Rsrc2  
Rsrc2  
Rsrc2  
Kntc1  
Mphosph9  
Mphosph9  
Mphosph9  
Mphosph9  
2810006K23Rik  
2810006K23Rik  
BC003324  
6330548G22Rik  
Ccdc92  
Zfp664  
Ubc  
Ubc  
Ubb  
Ubc  
Ubb  
AK183279  
Ubb  
AK004727  
Ubc  
Ubc  
Ubb  
Ubc  
Ubb  
AK183279  
Ubb  
AK004727  
Caln1  
Caln1  
Caln1  
Wbscr17  
Wbscr17  
mpp-GalNAc-T17(O6)  
Auts2  
Auts2  
Wbscr16  
Gtf2ird2  
Gtf2ird2  
Gtf2ird2  
Ncf1  
Ncf1  
Ncf1  
Gtf2i  
Gtf2i  
Gtf2i  
Gtf2i  
Diws1t  
Gtf2ird1  
Gtf2ird1  
Gtf2ird1  
Gtf2ird1  
Gtf2ird1  
Eif4h  
Eif4h  
Limk1  
Limk1  
Limk1  
Mlxipl  
Mlxipl  
BCL7B  
Bcl7b  
Baz1b  
Baz1b  
Baz1b  
Baz1b  
Hip1  
Por  
Srcrb4d  
Srcrb4d  
Srcrb4d

Zp3  
1200011022Rik  
1200011022Rik  
Alkbh4  
Alkbh4  
Cutl1  
Cutl1  
Cutl1  
Cutl1  
Cux/CDP(1B1)  
Cutl1  
Cutl1  
Cutl1  
Cutl1  
Cux/CDP(1B1)  
Emid2  
Emid2  
Emid2  
Fis1  
Cldn15  
Znhit1  
Znhit1  
Plod3  
Plod3  
mmu-mir-702  
Trim56  
Trim56  
Ache  
Ache  
Ache  
Ache  
2700038N03Rik  
Ars2  
Ars2  
Ars2  
Trip6  
Slc12a9  
Ars2  
Ars2  
Trip6  
Slc12a9  
Slc12a9  
Slc12a8  
Ephb4  
Ephb4  
Slc12a9  
Slc12a8  
Ephb4  
Ephb4  
Epo  
Gnb2  
Pop7  
mKIAA4110  
Perq1  
Hrbl  
Hrbl  
Hrbl  
BC028660  
6430598A04Rik  
6430598A04Rik  
6430598A04Rik  
Tsc22d4  
Tsc22d4  
Tsc22d4  
Mepce  
Zcwpw1  
Zfp113  
COPS6  
Cops6  
COPS6  
Ap4m1  
Pdgfa  
1110007L15Rik  
1110007L15Rik  
Centa1  
Mad111  
Mad1  
Grifin  
Lfng  
Lfng  
Zfp469  
Ocm  
Smurf1  
Rpl21  
Rpl21  
Ras11a  
Ras11a  
Lnx2  
Rpo1-3  
Rpo1-3  
Gsx1  
AK008755  
Pdx1  
Cdx2  
Cdx2  
Prhoxnb  
AK038337  
Pan3  
Pan3  
AK082086  
Uspl1  
Uspl1  
Uspl1  
Fry  
BC037393  
Pds5b  
AK021342  
AK006454  
Ppp1r9a  
Ppp1r9a  
Neurabin  
Ppp1r9a  
Ppp1r9a  
AK139424  
Nxph1  
Nxph1  
Nxph1  
Nxph1  
Nxph1  
Ndufa4  
Phf14  
Phf14  
AK173072  
Tmem168  
2610001J05Rik  
AK003812  
AK143417  
Tes  
Met  
Met  
St7  
St7  
St7  
Fam4a2  
Fam4a2  
St7  
Fam4a2  
Kcnd2  
Tspan12  
AK040992  
Cadps2  
Cadps2  
Grm8  
Grm8  
Grm8A  
Zfp800  
Zfp800  
AK052319

Impdh1  
Impdh1  
Calu  
Tnpo3  
Tnpo3  
Tnpo3  
Tnpo3  
Tspan33  
4631427C17Rik  
4631427C17Rik  
4631427C17Rik  
4631427C17Rik  
4631427C17Rik  
4631427C17Rik  
mmu-mir-182  
mmu-mir-96  
mmu-mir-183  
Zc3hc1  
Zc3hc1  
2410127E18Rik  
Chchd3  
Chchd3  
4921528H16Rik  
4921528H16Rik  
4921528H16Rik  
4921528H16Rik  
Cnot4  
Cnot4  
Cnot4  
Cnot4  
Cnot4  
Mtpn  
Dgki  
Dgki  
Zc3hav1  
Zc3hav1  
AK167137  
BC099561  
D130059P03Rik  
D130059P03Rik  
BC099561  
D130059P03Rik  
D130059P03Rik  
BC099561  
D130059P03Rik  
D130059P03Rik  
Luc7l2  
Luc7l2  
Luc7l2  
AK015545  
Luc7l2  
Luc7l2  
Luc7l2  
Luc7l2  
Klrg2  
Hipk2  
Tbxas1  
Tbxas1  
Tbxas1  
Tbxas1  
Mrps33  
Agk  
Agk  
Agk  
E330009J07Rik  
E330009J07Rik  
Wee2  
AK008907  
Arhgef5  
Arhgef5  
AK008907  
Arhgef5  
Arhgef5  
NR\_002841  
Atp6v0e2  
Lrrc61  
Lrrc61  
Lrrc61  
Lrrc61  
Lrrc61  
Lrrc61  
Igf2bp3  
mimp3  
Igf2bp3  
mimp3  
Igf2bp3  
mimp3  
Igf2bp3  
mimp3  
Igf2bp3  
mimp3  
Tra2a  
AK076606  
Hnrnpa2b1  
Hnrnpa2b1  
Hnrnpa2b1  
hnRNP A2/B1  
Cbx3  
Hoxa1  
Hoxa1  
Hoxa2  
Hoxa3  
Hoxa3  
AK142386  
AK039882  
AK146012  
Hoxa1  
Hoxa1  
Hoxa2  
Hoxa3  
Hoxa3  
AK039882  
AK146012  
Hoxa3  
Hoxa3  
AK146012  
Hoxa4  
AK012572  
Hoxa5  
Hoxa9  
Hoxa10  
Hoxa11  
U20367  
U20366  
U20369  
AK133929  
mmu-mir-196b  
AK031498  
Evx1  
AK031498  
Evx1  
Jazf1  
AK035031  
9430076C15Rik  
Creb5  
Creb5  
AK035031  
9430076C15Rik  
Creb5  
Creb5  
Cpvl  
Chn2  
Chn2  
AK020588  
Pigy  
Pigy  
Lancl2  
Grid2

Grid2  
Grid2  
Atoh1  
A930038C07Rik  
Serbp1  
Serbp1  
Serbp1  
abParts  
abParts  
Eif2ak3  
Eif2ak3  
Rmnd5a  
Jmjd1a  
Jmjd1a  
Jmjd1a  
Jmjd1a  
St3gal5  
Vamp5  
Vamp8  
Tcf3  
Tcf3  
Tcf3  
Sucla1  
Suclg1  
Ctnna2  
Ctnna2  
Lrrtm1  
Lrrtm1  
Lrrtm1  
Hk2  
D6Mm5e  
D6Mm5e  
Dok1  
Dok1  
Loxl3  
Loxl3  
Htra2  
Htra2  
Htra2  
Htra2  
Aup1  
Aup1  
Dqx1  
Dqx1  
Dqx1  
Htra2  
Htra2  
Htra2  
Htra2  
Tlx2  
PMUR10F  
Pcgf1  
Pcgf1  
Lbx2  
Ccdc142  
Ccdc142  
Mrpl53  
Gcs1  
mmu-mir-3470a  
Wbp1  
Znhit4  
Rtkn  
Rtkn  
Rtkn  
1700003E16Rik  
1700003E16Rik  
NR\_002871  
NR\_002873  
AK044313  
AY589788  
Vax2  
Paip2b  
AK144571  
Cyp26b1  
Cyp26b1  
mKIAA0919  
Sec15l2  
Sec15l2  
Emx1  
Pcyox1  
Tia1  
Tia1  
Tia1  
C87436  
AK052590  
AK079912  
Pcbp1  
BC029726  
AK005503  
AK079912  
Pcbp1  
BC029726  
AK005503  
BC029726  
AK005503  
Anxa4  
Nfu1  
Rpn1  
AK157963  
AK157963  
Wnt7a  
Wnt7a  
Tmem43  
Chchd4  
Tmem43  
Xpc  
Lsm3  
Xpc  
Lsm3  
Slc6a6  
Slc6a6  
Slc6a6  
Slc6a6  
C130022K22Rik  
C130022K22Rik  
C130022K22Rik  
C130022K22Rik  
Fgd5  
Fgd5  
Nr2c2  
Nr2c2  
Zfyve20  
Trh  
Prickle2  
Prickle2  
Prickle2  
Prickle2  
Prickle2  
AK007436  
AK044653  
AK044242  
Magi1  
Magi1  
Magi1  
Magi1  
Magi1  
Magi1  
Magi1  
Magi1

Magi1  
Magi1  
Magi1  
Magi1  
Magi1  
Lrig1  
Lrig1  
Suclg2  
Suclg2  
Suclg2  
C130034118Rik  
Frmd4b  
Frmd4b  
Frmd4b  
Frmd4b  
Frmd4b  
Frmd4b  
Frmd4b  
GOBLIN  
Mitf  
Mitf  
Mitf  
Mitf  
Mitf  
Foxp1  
Foxp1  
Foxp1  
Foxp1  
Foxp1a  
AK051887  
AK051887  
AK051887  
Prok2  
Prok2  
Rybp  
Shq1  
Glt8d4  
Ppp4r2  
Ppp4r2  
Ppp4r2  
Ppp4r2  
Pdzrn3  
Semcap3  
Pdzrn3  
Semcap3  
Pdzrn3  
Semcap3  
Chl1  
Chl1  
Chl1  
Chl1  
Cntn4  
Cntn4  
Cntn4  
Cntn4  
Lrrn1  
Lrrn1  
Itpr1  
Itpr1  
Itpr1  
Itpr1  
AK039720  
AK042445  
Bhlhb2  
AK039720  
AK042445  
Bhlhb2  
Arl8b  
Grm7  
Grm7  
Srgap3  
Srgap3  
Srgap3  
Srgap3  
Thumpd3  
Thumpd3  
AK021028  
U83175  
U83174  
mKIAA1757  
Setd5  
mKIAA1757  
Setd5  
Setd5  
mKIAA1757  
Cpne9  
Brpf1  
Brpf1  
Brpf1  
Brpf1  
Brpf1  
Brpf1  
Brpf1  
AK016007  
Brpf1  
Ogg1  
Camk1  
Camk1  
Arpc4  
Tada3l  
Tada3l  
Tada3l  
Arpc4  
Ttl3  
Ttl3  
Ttl3  
Cidec  
Cidec  
Jagn1  
Jagn1  
Jagn1  
Il17re  
Prprt3  
Prprt3  
Prprt3  
Tmem111  
AK164779  
Fancd2  
Fancd2  
4931417G12Rik  
6720456B07Rik  
Vhlh  
Slc6a1  
Slc6a1  
Slc6a1  
Slc6a1  
Slc6a1

Slc6a1  
Hrh1  
Hrh1  
Vgll4  
Vgll4  
Vgll4  
Vgll4  
Vgll4  
AK076253  
AK078466  
Vgll4  
Vgll4  
AK078466  
Pparg  
Raf1  
Raf1  
Raf1  
Raf1  
Raf1  
Raf1  
Rpl32  
BC060267  
Mbd4  
Mbd4  
Ift122  
mFLJ00025  
H1foo  
Plxnd1  
Plxnd1  
Plxnd1  
Tmcc1  
Tmcc1  
Tmcc1  
D6Wsu116e  
D6Wsu116e  
D6Wsu116e

Mar-08  
Mar-08

Rassf4  
Rassf4  
Rassf4  
Cxcl12  
Cxcl12  
Cxcl12  
Cxcl12  
AK006540  
AK006540  
AK006540  
AK006540  
AK006540  
Hnrpf  
Hnrpf  
AK180911  
Rasgef1a  
Bms1  
Bms1  
Bms1  
Cacna1c  
Cacna1c  
Adipor2  
Adipor2  
Adipor2  
Adipor2  
Adipor2  
Adipor2  
Adipor2  
Wnt5b  
Wnt5b  
Wnt5b  
Wnt5b  
Wnt5b  
Fbxl14  
Wnt5b  
Wnt5b  
Fbxl14  
Wnt5b  
Wnt5b  
Wnt5b  
Wnt5b  
Fbxl14  
Wnt5b  
Wnt5b  
Fbxl14  
Wnt5b  
Erc1  
Erc1  
Erc1  
Wnk1  
Wnk1  
Wnk1  
Wnk1  
mmu-mir-706  
Ninj2  
B4galnt3  
Ccdc77  
Ccdc77  
Ccdc77  
Ccdc77  
Jarid1a  
Jarid1a  
Ccdc77  
Ccdc77  
Ccdc77  
Jarid1a  
Jarid1a  
Cecr6  
Cecr5  
AK006942  
AK137536  
AK137536  
AK137536  
Atp6v1e1  
Bcl2l13  
Bcl2l13  
Pex26  
Tuba8  
Usp18  
Usp18  
M6pr  
M6pr  
Phc1  
mKIAA1238  
4933426K21Rik  
4933426K21Rik  
4933426K21Rik  
Apobec1  
Apobec1  
Slc2a3  
Foxj2  
Clstn3  
AK213543  
Clstn3  
AK213543  
C1s

C1s  
Mboat5  
Ptpn6  
Ptpn6  
Ptpn6  
Grcc10  
Atn1  
Grcc10  
Atn1  
Atn1  
Ptpn6  
Ptpn6  
Ptpn6  
Grcc10  
Atn1  
Grcc10  
Atn1  
Atn1  
Ptpn6  
Ptpn6  
Grcc10  
Atn1  
Grcc10  
Atn1  
Atn1  
Ptpn6  
Ptpn6  
Grcc10  
Atn1  
Grcc10  
Atn1  
Atn1  
Atn1  
Atn1  
Atn1  
Atn1  
Eno2  
Lrrc23  
Spsb2  
Spsb2  
Spsb2  
Spsb2  
Spsb2  
Spsb2  
Tpi1  
Tpi1  
Cdca3  
Tpi1  
Usp5  
Cdca3  
Usp5  
Gnb3  
Leprel2  
Gnb3  
Leprel2  
Gnb3  
Leprel2  
Gpr162  
Gnb3  
Leprel2  
Gpr162  
Leprel2  
Gpr162  
Cd4  
Leprel2  
Gpr162  
Cd4  
Cd4  
Cd4  
Cd4  
Lag3  
A230083G16Rik  
Cd4  
Cd4  
Cd4  
Lag3  
A230083G16Rik  
Lag3  
Ptms  
A230083G16Rik  
Mlf2  
Mlf2  
Mlf2  
Chd4  
mKIAA4075  
Chd4  
Chd4  
mKIAA4075  
Nol1  
A930037G23Rik  
Gapdh  
Gapdh  
Ncapd2  
Ncapd2  
AK013380  
bMRP64  
Mrpl51  
mmu-mir-3098  
Vamp1  
mVAMP-1  
AK080173  
mVAMP-1  
Tapbp1  
AK080173  
Cd27  
mVAMP-1  
Tapbp1  
AK080173  
Cd27  
Ltbr  
Scnn1a  
Tnfrsf1a  
Tnfrsf1a  
Tnfrsf1a  
Plekhg6  
Cd9  
AK046349  
Cd9  
AK046349  
Ntf3  
Ntf3  
Kcna1  
Kcna1  
Ndufa9  
Akap3  
Dyrk4





Plekha5  
Aebp2  
Aebp2  
Aebp2  
Aebp2  
Pde3a  
Pde3a  
AK043509  
Ldhd  
Kcnj8  
Bcat1  
Bcat1  
Las1  
Casc1  
Las1  
Lym5  
Kras  
AK008222  
Bhlhb3  
Bhlhb3  
Bhlhb3  
Itpr2  
TIPR  
TIPR  
TIPR  
Itpr2  
TIPR  
TIPR  
TIPR  
4933424B01Rik  
Fgfr1op2  
Tm7sf3  
Med21  
Stk38l  
Arntl2  
Ppfbp1  
EG545893  
Klhdc5  
Ccdc91  
Ergic2  
Ergic2  
AK005757  
Ipo8  
Ipo8  
Ipo8  
Ipo8  
Caprin2  
Caprin2  
Caprin2  
Caprin2  
Tera  
Tera  
AK087382  
Tera  
Tera  
AK087382  
Tera  
Tera  
AK087382  
D030011O10Rik  
D030011O10Rik  
4833442J19Rik  
4833442J19Rik  
2810474O19Rik  
2810474O19Rik  
AK134400  
mmu-mir-290  
mmu-mir-291a  
mmu-mir-292  
mmu-mir-291b  
mmu-mir-293  
mmu-mir-294  
mmu-mir-295  
Prkcc  
Rdh13  
Rdh13  
Eps8R1  
Eps8l1  
Eps8l1  
Rdh13  
Rdh13  
Eps8R1  
Eps8l1  
Eps8l1  
Eps8R1  
Eps8l1  
Eps8l1  
1500019G21Rik  
Brsk1  
Brsk1  
BC022651  
BC022651  
Suv420h2  
Suv420h2  
Suv420h2  
Il11  
BC126955  
2210411K11Rik  
Rpl28  
Isoc2b  
AK080857  
Ccdc106  
Ccdc106  
Ccdc106  
U2af2  
U2af2  
U2af2  
Epn1  
Zfp787  
Zfp787  
Zfp444  
Zfp444  
Zfp444  
6430701C03Rik  
6430701C03Rik  
6430701C03Rik  
Zfp329  
Zfp329  
2810007J24Rik  
2810007J24Rik  
Sepw1  
Gltscr2  
Gltscr2  
Gltscr2  
Ehd2  
Ehd2  
Gltscr1  
Slc8a2  
Mrg2  
Bbc3  
Bbc3  
Sae1  
Sae1  
BC057627  
Sae1  
Sae1  
BC057627  
Grf1  
Strn4  
Prkd2  
Prkd2  
Prkd2  
Prkd2  
Prkd2  
Calm3  
Pglyrp1  
Dmpk  
Dmpk

Six5  
mmu-mir-3100  
Vasp  
Vasp  
Nspl1  
Rtn2  
Rtn2  
Fosb  
Fosb  
Mark4  
Exoc3l2  
BC024868  
Gemin7  
Zfp296  
Zfp296  
Relb  
Clptm1  
Clptm1  
Apoc2  
Apoc4  
Apoc1  
Apoc1  
Apoe  
Apoe  
Tomm40  
Tomm40  
Tomm40  
Apoe  
Apoe  
Tomm40  
Tomm40  
Tomm40  
Tom40  
Pvrl2  
Pvrl2  
Pvrl2  
Bcam  
Bcam  
Cblc  
Cblc  
Cblc  
Cblc  
Cblc  
Cblc  
Bcl3  
Bcl3  
Zfp93  
Zfp93  
Cd79a  
mFLJ00369  
Arhgef1  
Arhgef1  
Arhgef1  
Pou2f2  
Pou2f2  
Dedd2  
Dedd2  
Flame-3  
Zfp526  
9130221H12Rik  
Cic  
Cic  
Cic  
mKIAA0306  
Cic  
Cic  
Cic  
mKIAA0306  
Pafah1b3  
Pafah1b3  
Tmem145  
Megf8  
Tmem91  
Tmem91  
Tmem91  
Tmem91  
B9d2  
B9d2  
Tgfb1  
Ccdc97  
Hnrpul1  
Hnrpul1  
Hnrpul1  
Axl  
Axl  
Axl  
Cyp2s1  
Cyp2s1  
Cyp2s1  
Axl  
Axl  
Cyp2s1  
Cyp2s1  
Cyp2s1  
Ltbp4  
Ltbp4  
Ltbp4  
AK008665  
AK191411  
Sertad1  
Prx  
2310022A10Rik  
2310022A10Rik  
2310022A10Rik  
Akt2  
Zfp60  
Zfp607  
1700049G17Rik  
1700049G17Rik  
1700049G17Rik  
AK076358  
Supt5h  
Supt5h  
Supt5h  
Supt5h  
Rps16  
Supt5h  
Supt5h  
Zfp36  
Med29  
Paf1  
Samd4b  
Samd4b  
Gmfg  
Gmfg  
Gmfg  
Lrfn1  
Hnrnpl  
Hnrnpl  
Ech1  
Actn4  
Eif3k  
Eif3s12  
Eif3k  
Map4k1  
Map4k1  
Map4k1  
A230107C01Rik  
A230107C01Rik  
Neud4  
Sipa1l3  
Sipa1l3  
Sipa1l3  
Sipa1l3  
Sipa1l3  
mKIAA0545  
Zfp82  
Zfp566  
Zfp260

0610010E21Rik  
Nphs1  
Nphs1  
Prodh2  
Gapdhs  
BC053749  
BC053749  
Lin37  
U2af1l4  
Tmem149  
U2af26  
Tmem149  
Hamp2  
AK218399  
AK154275  
Usf2  
Usf2  
Lsr  
Tmem162  
Tmem162  
2410004F06Rik  
Nudt19  
AK081136  
Vstm2b  
AK081136  
Vstm2b  
AK081136  
Vstm2b  
Lim2  
Nkg7  
Cldnd2  
BC112410  
BC112410  
AK078290  
AK082624  
AK082624  
AK082624  
AK005784  
AK005784  
AK005784  
Syt3  
Lrrc4b  
Mybpc2  
Spib  
Pold1  
AK184603  
Zfp473  
Zfp473  
Zfp473  
Zfp473  
Vrk3  
Zfp473  
Zfp473  
Zfp473  
Zfp473  
Vrk3  
Atf5  
Atf5  
Nup62  
Il4i1  
Il4i1  
Il4i1  
Prr12  
Prrg2  
Prrg2  
Nosip  
AK219239  
Rps11  
NR\_000004  
Rpl13a  
Rpl13a  
NR\_000003  
NR\_001277  
Flt3l  
Flt3l  
Flt3l  
Pih1d1  
Pih1d1  
Cd37  
Cd37  
Cd37  
Cd37  
Snrp70  
Snrp70  
Kcna7  
Ntf5  
Snrp70  
Snrp70  
Kcna7  
Ntf5  
Lhb  
Bax  
Bax  
Dhdh  
Tulp2  
Tulp2  
Tulp2  
Tulp2  
Nucb1  
Nucb1  
Nucb1  
Tulp2  
Tulp2  
Tulp2  
Tulp2  
Plekha4  
Plekha4  
Nucb1  
Nucb1  
Nucb1  
Myd116  
Myd116  
Plekha4  
Plekha4  
Plekha4  
Nucb1  
Nucb1  
Nucb1  
Myd116  
Myd116  
Plekha4  
Plekha4  
Plekha4  
Nucb1  
Nucb1  
Nucb1  
Myd116  
Myd116  
Plekha4  
Plekha4  
Plekha4  
Sec1  
Car11  
Dbp  
Rpl18  
EG545963  
Lmtk3  
Lmtk3  
Grin2d  
Kdelr1  
Erd2.1  
Sergef  
Spty2d1  
Spty2d1  
Dbx1  
Gas2  
Gas2  
Gas2  
Gas2

Herc2  
rjs  
Herc2  
rjs  
Gabrg3  
Gabrg3  
Gabbr3  
Gabbr3  
Snrpn  
6030441H18Rik  
6030441H18Rik  
Mcee  
Adamts17  
Adamts17  
Lrrc28  
Lrrc28  
Lrrc28  
Lrrc28  
Ttc23  
Ttc23  
AK049871  
Nr2f2  
Nr2f2  
AK045070  
BC070425  
Nr2f2  
Nr2f2  
AK045070  
BC070425  
DQ694834  
DQ703064  
DQ720410  
DQ716740  
DQ542042  
DQ707380  
DQ568730  
DQ686988  
DQ551845  
DQ564514  
DQ555568  
DQ693555  
AK043101  
Rgma  
Rgma  
Rgma  
Rgma  
Chd2  
Chd2  
Chd2  
Klhl25  
Klhl25  
Klhl25  
Klhl25  
Klhl25  
Klhl25  
Ntrk3  
Ntrk3  
Ntrk3  
Ntrk3  
Ntrk3  
Ntrk3  
Isg20l1  
Isg20l1  
mmu-mir-7a-2  
Rlbp1  
Rlbp1  
BC025462  
Fanci  
Fanci  
Polg  
Pol gamma  
AK032343  
AK047441  
mmu-mir-9-3  
Plin  
Plin  
Plin  
Plin  
Pex11a  
EG626359  
EG626359  
Zfp710  
Znf710  
Zfp710  
Zfp710  
Znf710  
Zfp710  
Sema4b  
Sema4b  
Sema4b  
mKIAA1745  
Cib1  
D330012F22Rik  
Ttl13  
Ttl13  
Ttl13  
Ttl13  
lqgap1  
AK006397  
lqgap1  
lqgap1  
lqgap1  
lqgap1  
lqgap1  
lqgap1  
lqgap1  
Wdr73  
Wdr73  
Wdr73  
Sec11a  
sid2895  
Fsd2  
Whdc1  
mKIAA1971  
Fsd2  
Whdc1  
mKIAA1971  
Hdgfrp3  
Hdgfrp3  
Hdgfrp3  
Eftud1  
Eftud1  
Eftud1  
Eftud1  
AK076849  
Rkhd3  
AK076849  
Rkhd3  
Mesdc1  
Mesdc2  
Rab38  
Dlg2  
Dlg2  
Pcf11  
Pcf11  
mKIAA0824  
Pcf11  
4632434111Rik  
Prpc  
Prpc  
Alg8  
1810020D17Rik  
Rsf1  
Rsf1  
Phca  
2210018M11Rik  
2210018M11Rik  
2210018M11Rik  
Wnt11

Wnt11  
Wnt11  
Uvrag  
Uvrag  
Uvrag  
Dgat2  
Gdpd5  
Neu3  
Pold3  
Pgm211  
Pgm211  
Pgm211  
Pgm211  
Pgm211  
Pgm211  
Ppme1  
AU020772  
AU020772  
AU020772  
Ppme1  
AU020772  
AU020772  
AU020772  
AU020772  
Ppme1  
AU020772  
AU020772  
AU020772  
AK040808  
Ucp2  
AK171117  
Chchd8  
Mrpl48  
Mrpl48  
Mrpl48  
Rab6  
B930006L02Rik  
B930006L02Rik  
Arhgef17  
mKIAA0769  
Fchsd2  
Atg16l2  
Atg16l2  
Stard10  
Stard10  
Stard10  
Inpp1  
Inpp1  
Inpp1  
Inpp1  
AK148373  
Il18bp  
Il18bp  
Rnf121  
Rnf121  
Rnf121  
Rnf121  
Trpc2  
Trp2  
Trpc2  
Trpc2  
Trpc2  
Rnf121  
Rnf121  
Trpc2  
Trp2  
Trpc2  
Trpc2  
Trpc2  
Rrm1  
Rrm1  
Trim21  
Olfir550  
AK136817  
Mrpl17  
Mrpl17  
Nrip3  
Nrip3  
Rab6ip1  
AK005418  
Zfp143  
mKIAA1766  
Sbf2  
Sbf2  
Sbf2  
Adm  
Usp47  
Usp47  
Usp47  
Tead1  
4632411J06Rik  
Mlstd2  
Mlstd2  
Rras2  
Pasma1  
Pasma1  
AK016693  
AK016630  
Pde3b  
Sox6  
Sox6  
Sox6  
Sox6  
Sox6  
Sox6  
Sox6  
Sox6  
BC048672  
1110004F10Rik  
1110004F10Rik  
Exod1  
2610020H08Rik  
Dcun1d3  
Dcun1d3  
Lym1  
Lym1  
Lym1  
Dcun1d3  
Dcun1d3  
Lym1  
Lym1  
Lym1  
4930408O21Rik  
AK034016  
AK018490  
BC030336  
4930408O21Rik  
AK034016  
AK018490  
BC030336  
Cog7  
Cog7  
Cacng3  
AK140221  
Atp2a1  
Psmbeta  
Sh2b1  
Sh2bpsm1  
Sh2b1  
Sh2bpsm1  
Tufm  
Tufm  
Sult1a1  
Sult1a1  
Giyd2  
Bola2  
Mapk3  
Mapk3  
Gdpd3  
Ypel3

Ppp4c  
Fam57b  
Taok2  
mKIAA0881  
1110032O16Rik  
1110032O16Rik  
Taok2  
mKIAA0881  
1110032O16Rik  
1110032O16Rik  
Mvp  
2900092E17Rik  
1500031I19Rik  
1500031I19Rik  
Cd2bp2  
Cd2bp2  
Cd2bp2  
mKIAA1178  
Tbc1d10b  
Mylpf  
Cd2bp2  
Cd2bp2  
Cd2bp2  
mKIAA1178  
Tbc1d10b  
Mylpf

Sep-01

Zfp553  
Zfp553  
Zfp553  
Zfp553  
Zfp771  
Zfp553  
2410015N17Rik  
Zfp553  
Zfp768  
Zfp553  
Zfp689  
AK041042  
AK045290  
Bcl7c  
Bcl7c  
Ctf1  
mmu-mir-762  
Bcl7c  
Bcl7c  
Ctf1  
Fbxl19  
Fbxl19  
Fbxl19  
Fbxl19  
Fbxl19  
Fbxl19  
Zfp668  
Zfp646  
Zfp646  
Prss8  
Prss8  
Prss36  
Prss36  
Prss36  
Prss36  
Fus  
Fus  
Fus  
Fus  
Fus  
AK134717  
AK079777  
Fus  
Fus  
Fus  
AK134717  
AK079777  
Fus  
Fus  
Fus  
AK134717  
AK079777  
9130023H24Rik  
Tgfb1i1  
Tgfb1i1  
Tgfb1i1  
Slc5a2  
Rgs10  
Tial1  
Fgfr2  
Fgfr2  
Fgfr2  
Fgfr2  
Tacc2  
Tacc2  
Tacc2  
Tacc2  
Plekha1  
Plekha1  
Plekha1  
Plekha1  
Cuzd1  
1700007K09Rik  
1700063I17Rik  
1700063I17Rik  
Hmx2  
Bub3  
Hmx2  
Bub3  
Hmx2  
Bub3  
4631426J05Rik  
4631426J05Rik  
4631426J05Rik  
4631426J05Rik  
Oat  
2010208K18Rik  
C430003P19Rik  
C430003P19Rik  
C430003P19Rik  
mKIAA0157  
AK158854  
2010208K18Rik  
C430003P19Rik  
C430003P19Rik  
C430003P19Rik  
mKIAA0157  
AK158854  
AK005115  
Zranb1  
Zranb1  
Ctbp2  
Ebf3  
Ebf3  
Tcerg1l  
Lrrc27  
Pwwp2  
Lrrc27  
Pwwp2  
Pwwp2  
Pwwp2  
Msx3  
Tmem16j  
Tmem16j  
Ptdss2  
Ptdss2  
Tmem16j  
Tmem16j  
Ptdss2  
Ptdss2  
Rnh1  
Rnh1

Rnh1  
Chid1  
2700078K21Rik  
Mob2  
2700078K21Rik  
Mob2  
Igf2  
Igf2  
NR\_002855  
mmu-mir-483  
Phlda2  
Cars  
Shank2  
Ccnd1  
AK007416  
Tpcn2  
Arhgef18  
Arhgef18  
AK019114  
Trappc5  
AK019114  
Trappc5  
B130050I23Rik  
B130050I23Rik  
B130050I23Rik  
B130050I23Rik  
B130050I23Rik  
Lrrc8e  
Map2k7  
Map2k7  
MKK7  
Map2k7  
Map2k7  
Snapc2  
BC003267  
AK082314  
Efnb2  
AK007249  
Efnb2  
AK007249  
Tmem28  
Rab20  
BC030398  
0710008K08Rik  
0710008K08Rik  
Rab20  
BC030398  
0710008K08Rik  
0710008K08Rik  
Ankrd10  
Ankrd10  
Arhgef7  
Arhgef7  
Arhgef7  
EG434280  
Lamp1  
Dlgap2  
Dlgap2  
6820431F20Rik  
6820431F20Rik  
6820431F20Rik  
LOC436177  
5330429B09Rik  
Ap3m2  
Ank1  
Ank1  
Agpat6  
Tsarg7  
Agpat6  
Tsarg7  
Sfrp1  
Tacc1  
Tacc1  
Tacc1  
Fgfr1  
Fgfr1  
Rab11fip1  
AK040272  
Rab11fip1  
Got1l1  
Got1l1  
Rbm13  
Fut10  
Fut10  
Nrg1  
Nrg1  
Nrg1  
Nrg1  
Nrg1  
Ppp2cb  
Rbpms  
Rbpms  
Dusp4  
Dusp4  
Tnks  
Cldn23  
AK076961  
Sgcz  
Tusc3  
Tusc3  
Fat1  
Fat1  
Fat1  
Helt  
Helt  
Helt  
Ing2  
AK083994  
AK029624  
AK032387  
Vegfc  
BC088983  
Fbxo8  
Fbxo8  
Sap30  
AK141659  
AK019137  
2700029M09Rik  
Clcn3  
Clcn3  
CLCN3  
CLCN3  
CLCN3  
Clcn3  
CLCN3  
Clcn3  
CLCN3  
Nek1  
Nek1  
Nek1  
Nek1  
Clcn3  
CLCN3  
CLCN3  
Nek1  
Nek1  
Nek1

1810029B16Rik  
Psd3  
Psd3  
Psd3  
Slc18a1  
Slc18a1  
Slc18a1  
Atp6v1b2  
Atp6v1b2  
Atp6v1b2  
AK203140  
AK076396  
Gatad2a  
mKIAA0892  
9130404D08Rik  
9130404D08Rik  
Sf4  
Sf4  
Sf4  
Hapln4  
Rfxank  
Mef2b  
Mef2b  
Tmem161a  
Armc6  
Armc6  
Sfrs14  
Sfrs14  
Sfrs14  
Sfrs14  
Sfrs14  
Comp  
Klhl26  
Klhl26  
Klhl26  
Crlf1  
Klhl26  
Klhl26  
Klhl26  
Tmem59l  
Crlf1  
CRLM3  
Ssbp4  
Ssbp4  
Lrrc25  
Ssbp4  
Ssbp4  
Lrrc25  
Ssbp4  
Ssbp4  
Lrrc25  
Jund1  
Jund1  
AK010542  
Kcnn1  
Kcnn1  
Kcnn1  
2410004L22Rik  
Myo9b  
Myo9b  
Myo9b  
Myo9b  
Mrpl34  
1500034J01Rik  
Unc13a  
Unc13a  
Unc13a  
Jak3  
Jak3  
Jak3  
Jak3  
Ins13  
Zfp617  
s11-6  
Tpm4  
Tpm4  
Rab8A  
Rab8a  
Nwd1  
Nwd1  
Nwd1  
Nwd1  
Large  
Hmox1  
Mcm5  
Mcm5  
Mcm5  
Mcm5  
AK162930  
Nr3c2  
Rbmxrt  
Rbmxrt  
P7  
Slc10a7  
Slc10a7  
D630040G17Rik  
Smad1  
Smad1  
Otud4  
Otud4  
Hhip  
Gab1  
Pkn1  
Pkn1  
Ddx39  
AK157878  
Asf1b  
Prkaca  
AK008705  
4432412L15Rik  
mmu-mir-1199  
Rfx1  
Rfx1  
Rfx1  
mmu-mir-709



Cacna1a  
BC048761  
Cacna1a  
AK037841  
Ier2  
AK037841  
Ier2  
AK037841  
Ier2  
AK037841  
Nfix  
Nfix  
AK168184  
Nfix  
Nfix  
Nfix  
Nfix  
Dand5  
SP1  
Gadd45gip1  
Rad23a  
Rad23a  
Rad23a  
AK007237  
SP1  
Rad23a  
Rad23a  
Rad23a  
Calr  
AK007237  
Farsa  
Farsla  
Farsa  
Mast1  
Mast1  
Mast1  
Rtbdn  
Rtbdn  
Rtbdn  
Rnaseh2a  
Rnaseh2a  
Prdx2  
Prdx2  
Rnaseh2a  
Rnaseh2a  
Prdx2  
Prdx2  
Rnaseh2a  
Rnaseh2a  
Prdx2  
Prdx2  
Rnaseh2a  
Rnaseh2a  
Prdx2  
Prdx2  
AK006748  
Junb  
Hook2  
Hook2  
Rnaseh2a  
Rnaseh2a  
Prdx2  
AK006748  
Junb  
Hook2  
Hook2  
Rnaseh2a  
Rnaseh2a  
AK006748  
Junb  
Hook2  
Hook2  
Junb  
Hook2  
Hook2  
Vps35  
Orc6l  
Orc6  
Nkd1  
Cylid  
Cylid  
Sall1  
Sall1  
Chd9  
Nudt21  
mKIAA1612  
Ogfod1  
Mt2  
Mt1  
Mt1  
Mt1  
Mt1  
Cpne2  
Cpne2  
2310065K24Rik  
2310065K24Rik  
Rspry1  
Rspry1  
Rspry1  
2310065K24Rik  
2310065K24Rik  
Rspry1  
Rspry1  
Rspry1  
Gtl3  
Gtl3  
mKIAA1180  
Ndrgr4  
Setd6  
Setd6  
Setd6  
mmu-mir-1186b  
Cdh8  
Cdh8  
Cdh8  
A330008L17Rik  
AK042807  
Cdh5  
Tk2  
Cklf  
Cklf  
CKLF6  
Cklf  
Cmtm4  
Cbfb  
Lrrc29  
Lrrc29  
Hspc171  
mmu-mir-328  
Agrp  
2310066E14Rik  
mmu-mir-1966  
Agrp  
AK086852  
AK080383  
Ctcf  
Ctrl  
Psmb10  
Lcat  
Slc12a4  
Slc12a4  
AK139607  
Has3  
Has3  
Has3  
Has3  
Cog8  
AK209600  
Cog8  
Nip7

Nfat5  
Nfat5  
Nfat5  
Nfat5  
Nfat5  
Nfat5  
Nfat5  
Nfat5  
Psmc7  
AK158379  
Zfx3  
Zfx3  
mKIAA0174  
2400003C14Rik  
2400003C14Rik  
4930566A11Rik  
4930566A11Rik  
4930566A11Rik  
4930566A11Rik  
Ap1g1  
Ap1g1  
Ddx19b  
Ddx19b  
Aars  
Ddx19b  
Ddx19b  
Aars  
Mrcl  
AK020517  
AK053982  
AK020517  
AK053982  
Glg1  
Rfwd3  
Rfwd3  
Fa2h  
Fa2h  
Wdr59  
Znrf1  
Znrf1  
Wdr59  
Znrf1  
Znrf1  
Bcar1  
Bcar1  
Bcar1  
p130Cas  
Bcar1  
Bcar1  
p130Cas  
Tmem170  
Tmem170  
4932417116Rik  
Gabarapl2  
Adat1  
Adat1  
Kars  
Terf2ip  
Terf2ip  
Adat1  
Adat1  
Kars  
Terf2ip  
Terf2ip  
Adat1  
Adat1  
Kars  
Terf2ip  
Terf2ip  
4632415K11Rik  
mKIAA1609  
Cotl1  
Gse1  
Gse1  
Gse1  
Gse1  
Gse1  
Mthfsd  
Mthfsd  
Foxc2  
Mthfsd  
Mthfsd  
Foxc2  
Foxl1  
Mthfsd  
Mthfsd  
Foxc2  
Foxl1  
Zfpm1  
Trhr2  
5830416A07Rik  
5830416A07Rik  
Cbfa2t3h  
Cbfa2t3h  
Ankrd11  
Ankrd11  
Fanca  
Fanca  
Fanca  
Fanca  
Fanca  
Spire2  
Fanca  
Fanca  
Fanca  
Fanca  
Spire2  
Spire2  
Tubb3  
AK193394  
Afg3l1  
Afg3l1  
Dbn1d1  
Dbn1d1  
Gas8  
Gas8  
Rhou  
Taf5l  
Taf5l  
AK122209  
mmu-mir-1967  
Ttc13  
Ttc13  
Ttc13  
Arv1  
Arv1  
Disc1  
Disc1  
Kcnk1  
1810063B05Rik  
Pard3  
Pard3  
Pard3  
Pard3  
Pard3  
Pard3  
Pard3  
Nrp1  
Nrp1  
Nrp1  
Nrp1  
Nrp1  
Itgb1  
Ccdc7  
8430410K20Rik  
8430410K20Rik  
Tmem123  
Tmem123  
Birc2

Yap1  
Yap1  
Mtmr2  
Mtmr2  
Cep57  
Cep57  
Cep57  
Cep57  
2810485105Rik  
Fam76b  
Cep57  
Cep57  
Cep57  
Cep57  
2810485105Rik  
Fam76b  
Amot1  
Amot1  
Amot1  
Amot1  
Panx1  
mKIAA4237  
Zfp426  
Zfp426  
Zfp426  
mKIAA4237  
Zfp426  
Zfp426  
Zfp426  
mKIAA4237  
Zfp426  
Zfp426  
Zfp426  
mKIAA4237  
Zfp426  
Zfp426  
Zfp426  
Fbxl12  
Fbxl12  
Fbxl12  
Ubl5  
Pin1  
Olfm2  
Olfm2  
Dnmt1  
Edg5  
Edg5  
MRPL4  
Mrpl4  
Edg5  
MRPL4  
Mrpl4  
MRPL4  
Mrpl4  
H1f0  
Icam1  
H1f0  
Icam1  
Icam4  
Icam4  
Icam5  
Icam1  
Icam4  
Icam4  
Icam5  
Cdc37  
Pde4a  
Pde4a  
Pde4a  
Pde4a  
Keap1  
Keap1  
Keap1  
Keap1  
Keap1  
Keap1  
Keap1  
Keap1  
Keap1  
Edg8  
Ilf3  
Ilf3  
Ilf3  
Rab3d  
BC010787  
2510048L02Rik  
2510048L02Rik  
2510048L02Rik  
BC018242  
BC018242  
Elavl3  
Elavl3  
Elavl3  
Zfp653  
AK154427  
AK016276  
Acp5  
Acp5  
Acp5  
Pigyl  
9530015107Rik  
Bmper  
Tbx20  
Tbx20  
Tbx20

Sep-07

mKIAA4020  
Glb1l3  
Ncapd3  
Ncapd3  
mKIAA0056  
Hnt  
Hnt  
Hnt  
Hnt  
Barx2  
Kcnj1  
Ets1  
St3gal4  
AK019824  
Cdon  
Cdon  
Stt3a  
AK018988  
Pknox2  
Pknox2  
PREP2  
Pknox2  
Pknox2  
PREP2  
Slc37a2  
AF060570  
Vsig2  
Nrgn  
Nrgn  
Zfp202  
Znf202  
Gramd1b  
Gramd1b  
AK089373  
Hspa8  
Arhgef12  
Arhgef12  
Arhgef12  
Pou2f3  
Pvrl1  
Pvrl1  
AK087650  
Thy1

Rnf26  
Rnf26  
Mcam  
Tmem24  
Tmem24  
Dpagt1  
Dpagt1  
H2afx  
Tmem24  
Tmem24  
Dpagt1  
Dpagt1  
H2afx  
Hmbs  
Hmbs  
Vps11  
Vps11  
Vps11  
Hyou1  
Hyou1  
Trappc4  
Trappc4  
Rps25  
Rps25  
AK078316  
Bcl9l  
Bcl9l  
AK078316  
Bcl9l  
Bcl9l  
Phldb1  
Phldb1  
Phldb1  
Phldb1  
Arcn1  
Arcn1  
1500035H01Rik  
1500035H01Rik  
Mll1  
Mll1  
Mpzl2  
Mpzl3  
Mpzl3  
Cep164  
Cep164  
Bace  
Bace1  
Bace  
Cep164  
Cep164  
Bace  
Bace1  
Bace  
Pafah1b2  
AK011326  
BC033915  
Zfp259  
Bud13  
Bud13  
sgigsf  
Cadm1  
Cadm1  
Cadm1  
sgigsf  
Cadm1  
Cadm1  
Cadm1  
sgigsf  
Cadm1  
Cadm1  
Cadm1  
sgigsf  
Cadm1  
Cadm1  
Cadm1  
Rexo2  
Rexo2  
EG434402  
Zbtb16  
Zbtb16  
Zbtb16  
Tmprss5  
Drd2  
Dlat  
Dixdc1  
Dixdc1  
Dixdc1  
Dixdc1  
Dixdc1  
2310030G06Rik  
Cryab  
Cryab  
Cryab  
Ppp2r1b  
Ppp2r1b  
4833427G06Rik  
Btg4  
if5  
Btg4  
4833427G06Rik  
Btg4  
if5  
Btg4  
mKIAA1726  
AI593442  
AI593442  
Wdr61  
Wdr61  
C630028N24Rik  
C630028N24Rik  
AY074887  
Pasma4  
Etf  
Isl2  
Sgk269  
C230081A13Rik  
Hmg20a  
Hmg20a  
Hmg20a  
Hmg20a  
Hmg20a  
Sgk269  
C230081A13Rik  
Hmg20a  
Hmg20a  
Hmg20a  
Hmg20a  
Hmg20a  
Sh3px3  
Imp3  
Sh3px3  
Imp3  
Snupn  
Snupn  
Ptpn9  
AK143982  
AK162906  
AK012238  
Sin3a  
Sin3a  
Sin3a  
AK143982  
AK162906  
AK012238  
Sin3a  
Sin3a  
Sin3a  
AK077427  
AK010793

Man2c1  
Man2c1  
Man2c1  
Man2c1  
AK077427  
AK010793  
Man2c1  
Man2c1  
Man2c1  
Man2c1  
2310046O06Rik  
2310046O06Rik  
Mpi  
Scamp2  
Arid3b  
Arid3b  
Arid3b  
Arid3b  
Ccdc33  
4930535E21Rik  
Stra6  
4930535E21Rik  
4930535E21Rik  
Stra6  
Stra6  
Ccdc33  
4930535E21Rik  
Stra6  
4930535E21Rik  
4930535E21Rik  
Stra6  
Stra6  
Pml  
Pml  
Pml  
Stoml1  
Stoml1  
Nptn  
Nptn  
Nptn  
Hcn4  
Adpgk  
Adpgk  
Adpgk  
Adpgk  
Senp8  
AK048681  
AK168746  
Nr2e3  
Pnr  
Pnr  
Kif23  
Kif23  
Kif23  
Kif23  
Glce  
AK043361  
Anp32a  
AK028224  
Anp32a  
AK028224  
Anp32a  
AK028224  
Fem1b  
Cln6  
Pias1  
Lbxcor1  
Lbxcor1  
Lbxcor1  
Zwilch  
Rpl4  
Snapc5  
Map2k1  
Tipin  
Dis3l  
Dis3l  
Dis3l  
AV340375  
Megf11  
Megf11  
Megf11  
Ptplad1  
Dpp8  
Dpp8  
Ptplad1  
Dpp8  
Dpp8  
Nope  
Punc  
Punc  
Punc  
Rbpms2  
Rbpms2  
Rbpms2  
Rbpms2  
Zfp609  
Trip4  
Trip4  
2810417H13Rik  
Trip4  
Trip4  
2810417H13Rik  
Herc1  
Herc1  
Herc1  
Herc1  
Fbxl22  
Rab8b  
Rab8b  
Perq1  
Tpm1  
Tpm1  
Tpm1  
Rora  
Rora  
Foxb1  
AK045913  
Foxb1  
AK045913  
Myo1e  
Myo1e  
Myo1e  
Met  
Met  
Met  
Sltm  
Sltm  
B230380D07Rik  
B230380D07Rik  
B230380D07Rik  
Adam10  
Grinl1a  
Grinl1a  
Tcf12  
Tcf12  
Tcf12  
Rfxdc2  
Rfxdc2  
Prtg  
Dyx1c1  
Onecut1  
Onecut1  
Onecut1  
BC031353  
BC031353  
BC031353  
Gnb5  
AK134928  
Gnb5

Gnb5  
Leo1  
Elov15  
Fbxo9  
Fbxo9  
Fbxo9  
Fbxo9  
Ick  
Ick  
Ick  
Gsta4  
Cd109  
Cd109  
Cox7a2  
Phip  
Phip  
Phip  
Phip  
Phip  
Phip  
Phip  
Phip  
Lca5  
Lca5  
Lca5  
AK076672  
Ttk  
Ttk  
mKIAA1417  
Ibtk  
mKIAA1417  
Ibtk  
Ibtk  
mKIAA1417  
Ibtk  
AK162386  
Tpbg  
Tpbg  
Tpbg  
Tbx18  
Snx14  
Snx14  
Snx14  
Rasgrf1  
Rasgrf1  
Rasgrf1  
Adamts7  
Adamts7  
Adamts7  
Adamts7  
Zic4  
Zic4  
Zic4  
Zic1  
Zic1  
Zic4  
Zic4  
Zic4  
Zic4  
Zic4  
Zic4  
Zic1  
Zic1  
Zic4  
Zic4  
Zic4  
Zic4  
Zic4  
Zic4  
Zic4  
Zic1  
Zic1  
Zic4  
Zic4  
Zic4  
Zic4  
Zic4  
Zic1  
Zic1  
Zic4  
Zic4  
Zic4  
Zic4  
Zic4  
Zic4  
Zic4  
Zic1  
Zic1  
Zic4  
Zic4  
Zic4  
PIScr1  
PIScr1  
2610101N10Rik  
2610101N10Rik  
2610101N10Rik  
2610101N10Rik  
AI427122  
AK006889  
1700065D16Rik  
AK141900  
Atr  
AK142244  
Tfdp2  
Tfdp2  
Tfdp2  
Slc25a36  
NR\_003248  
Foxl2  
Faim  
Faim  
Cep70  
Cep70  
Cep70  
Cep70  
Stag1  
Stag1  
Stag1  
Stag1  
Stag1  
Stag1  
3222402P14Rik  
3222402P14Rik  
3222402P14Rik  
Ephb1  
Ephb1  
Ephb1  
Ephb1  
Cep63  
Cep63  
D9Mgc48e  
Anapc13  
Anapc13  
AK147911  
Nek11  
Nek11  
Nek11  
Aste1  
Aste1  
Aste1  
Atp2c1  
Atp2c1  
Atp2c1  
AK051019  
CS444466

mmu-mir-135a-1  
Alas1  
Alas1  
Dusp7  
Rpl29  
Rpl29  
Rpl29  
Rpl29  
Abhd14b  
Rbm15b  
Armet  
Armet  
Mapkapk3  
Mapkapk3  
Mapkapk3  
Mapkapk3  
Cish  
Tmem115  
Tusc4  
Zmynd10  
Rassf1  
Cyb561d2  
Cyb561d2  
Rassf1  
Tusc2  
Hyal2  
Hyal2  
AK044848  
Hyal2  
Hyal2  
Hyal1  
Hyal1  
Hyal1  
Nat6  
Nat6  
Hyal3  
Ifrd2  
Rbm6  
D330022A01Rik  
Ube1l  
D330022A01Rik  
6230427J02Rik  
D330022A01Rik  
1700021K14Rik  
Ihpk1  
AK197603  
Ihpk1  
Ihpk1  
Ip6k1  
Dag1  
Dag1  
Dag1  
Klhdc8b  
Klhdc8b  
Lamb2  
Usp19  
Usp19  
Usp19  
Usp19  
Usp19  
Qars  
Qars  
Qars  
Qrich1  
Qrich1  
Qrich1  
Qars  
Qars  
Qars  
Qrich1  
Qrich1  
Qrich1  
Impdh2  
4733401H18Rik  
Dalrd3  
mmu-mir-191  
mmu-mir-425  
Prkar2a  
Scotin  
Scotin  
Scotin  
Scotin  
6620401K05Rik  
6620401K05Rik  
Ccdc72  
Ccdc51  
Ccdc51  
Plxnb1  
6620401K05Rik  
6620401K05Rik  
Ccdc72  
Ccdc51  
Ccdc51  
Plxnb1  
Ccdc72  
Plxnb1  
Ccdc72  
Plxnb1  
Cdc25a  
Cdc25a  
Cdc25a  
Cdc25a  
Mtap4  
Mtap4  
Mtap4  
Mtap4  
Mtap4  
Klh18  
Kif9  
Kif9  
Kif9  
Kif9  
Ccdc12  
Ccdc12  
Ccdc12  
Tessp2  
Rtp3  
Mlh1  
Mlh1  
Lba1  
Ubp1  
Trim71  
Cnot10  
Dync1li1  
Dync1li1  
Cmtm7  
Cmtm7  
Lnv  
Cmtm8  
AK161079  
Stt3b  
AK013480  
Azi2  
Azi2  
AZ2  
Eomes  
Eomes  
Eomes  
Oxsr1  
Acaa1a  
Slc25a38  
Slc25a38  
Rpsa  
Rpsa  
NR\_002902  
Slc25a38  
Slc25a38  
Rpsa





| pan Blimp1 target genes | pan DP lineage signature genes      | intersection pan Blimp1 target genes with pan DP lineage signature genes |
|-------------------------|-------------------------------------|--------------------------------------------------------------------------|
| 0610007P14Rik           | 0610005C13Rik                       | 0610037L13Rik                                                            |
| 0610009B22Rik           | 0610010B08Rik//Gm14295//Gm14305     | 1100001G20Rik                                                            |
| 0610009O20Rik           | 0610010B08Rik//Gm14308//Gm14325     | 1100004E09Rik                                                            |
| 0610010E21Rik           | 0610037L13Rik                       | 1190003J15Rik                                                            |
| 0610010K14Rik           | 0610040J01Rik                       | 1700001C19Rik                                                            |
| 0610010O12Rik           | 0910001A06Rik                       | 1700021K14Rik                                                            |
| 0610013E23Rik           | 1100001G20Rik                       | 1700120B22Rik                                                            |
| 0610025P10Rik           | 1100001H23Rik /// LOC100045163      | 1810032O08Rik                                                            |
| 0610037D15Rik           | 1110003F05Rik                       | 2210407C18Rik                                                            |
| 0610037L13Rik           | 1110004E09Rik                       | 2310067B10Rik                                                            |
| 0610038F07Rik           | 1110006O24Rik                       | 2410015M20Rik                                                            |
| 0710008K08Rik           | 1110008P14Rik                       | 2510009E07Rik                                                            |
| 1100001G20Rik           | 1110002A01Rik                       | 2610001J05Rik                                                            |
| 1110001A07Rik           | 1110035H17Rik                       | 2610507B11Rik                                                            |
| 1110002N22Rik           | 1110037F02Rik                       | 2810025M15Rik                                                            |
| 1110003E01Rik           | 1110054M08Rik                       | 2810417H13Rik                                                            |
| 1110004E09Rik           | 1110057K04Rik                       | 2810439F02Rik                                                            |
| 1110004F10Rik           | 1110059E24Rik                       | 2810474O19Rik                                                            |
| 1110005A23Rik           | 1110064A23Rik                       | 3110057O12Rik                                                            |
| 1110007C09Rik           | 1190002N15Rik                       | 4930427A07Rik                                                            |
| 1110007L15Rik           | 1190003J15Rik                       | 4930429B21Rik                                                            |
| 1110008J03Rik           | 1190005I06Rik                       | 4930430E16Rik                                                            |
| 1110008L16Rik           | 1200016E24Rik                       | 4930570C03Rik                                                            |
| 1110012D08Rik           | 1300017J02Rik                       | 4932438H23Rik                                                            |
| 1110012J17Rik           | 1500002F19Rik                       | 4933428G20Rik                                                            |
| 1110014N23Rik           | 1500015O10Rik                       | 6030458C11Rik                                                            |
| 1110019K23Rik           | 1600014C10Rik                       | 9030409G11Rik                                                            |
| 1110020G09Rik           | 1600015I10Rik                       | A130010J15Rik                                                            |
| 1110029E03Rik           | 1600029D21Rik                       | AI317395                                                                 |
| 1110031B06Rik           | 1700001C19Rik                       | AI661453                                                                 |
| 1110031I02Rik           | 1700001F09Rik//Gm10375//Gm10377     | AK009121                                                                 |
| 1110032O16Rik           | 1700001G17Rik                       | AU040320                                                                 |
| 1110034B05Rik           | 1700001O22Rik                       | Aars                                                                     |
| 1110036O03Rik           | 1700008F21Rik//Zfp821               | Aatk                                                                     |
| 1110038D17Rik           | 1700010I14Rik                       | Abat                                                                     |
| 1110038F14Rik           | 1700011A15Rik                       | Abca1                                                                    |
| 1110049F12Rik           | 1700012L04Rik//Gm14474//Gm14475     | Abca8a                                                                   |
| 1110051M20Rik           | 1700017B05Rik                       | Abcb7                                                                    |
| 1110054O05Rik           | 1700018B24Rik                       | Abcc10                                                                   |
| 1190003J15Rik           | 1700019D03Rik                       | Abcc2                                                                    |
| 1190005F20Rik           | 1700019G17Rik                       | Abcc5                                                                    |
| 1200009I06Rik           | 1700019N19Rik                       | Abcd4                                                                    |
| 1200011O22Rik           | 1700020D05Rik                       | Abcf1                                                                    |
| 1200014J11Rik           | 1700021K14Rik                       | Abcf2                                                                    |
| 1200015F23Rik           | 1700028P14Rik                       | Abcf3                                                                    |
| 1200016B10Rik           | 1700029F12Rik                       | Abhd14b                                                                  |
| 1300007F04Rik           | 1700029H14Rik                       | Abhd3                                                                    |
| 1300010M03Rik           | 1700029P11Rik                       | Acbd3                                                                    |
| 1300018I05Rik           | 1700037H04Rik                       | Ache                                                                     |
| 1500001A10Rik           | 1700065O13Rik                       | Acin1                                                                    |
| 1500003O03Rik           | 1700067P10Rik                       | Aco2                                                                     |
| 1500005A01Rik           | 1700071K01Rik//Phb                  | Acot11                                                                   |
| 1500005I02Rik           | 1700073E17Rik                       | Acp2                                                                     |
| 1500010J02Rik           | 1700074P13Rik                       | Accs2                                                                    |
| 1500019G21Rik           | 1700080E11Rik                       | Acvrl1                                                                   |
| 1500031I19Rik           | 1700082M22Rik                       | Adam10                                                                   |
| 1500032L24Rik           | 1700088E04Rik                       | Adam15                                                                   |
| 1500034J01Rik           | 1700091H14Rik//Gm8068               | Adam5                                                                    |
| 1500035H01Rik           | 1700094J05Rik                       | Adamts10                                                                 |
| 1500035N22Rik           | 1700097N02Rik                       | Adamts20                                                                 |
| 1520401A03Rik           | 1700102P08Rik                       | Adamts4                                                                  |
| 1600002K03Rik           | 1700104A03Rik                       | Adamts7                                                                  |
| 1600012H06Rik           | 1700120B22Rik                       | Adamtsl4                                                                 |
| 1600029J14Rik           | 1700123K08Rik                       | Adamtsl5                                                                 |
| 1700001C19Rik           | 1810009A15Rik//LOC102308570         | Adat1                                                                    |
| 1700003E16Rik           | 1810009J06Rik//Gm2663               | Adck3                                                                    |
| 1700003F12Rik           | 1810009N02Rik                       | Adcy2                                                                    |
| 1700006E09Rik           | 1810011O10Rik                       | Adcy8                                                                    |
| 1700007I06Rik           | 1810019J16Rik                       | Adipoq                                                                   |
| 1700007K09Rik           | 1810032O08Rik                       | Adm                                                                      |
| 1700009P17Rik           | 1810041L15Rik                       | Adora1                                                                   |
| 1700010D01Rik           | 1810043G02Rik                       | Adpgk                                                                    |
| 1700010K24Rik           | 1810044D09Rik                       | Adprh                                                                    |
| 1700011E24Rik           | 1810055G02Rik                       | Adrkb2                                                                   |
| 1700011F14Rik           | 2010001M06Rik                       | Aftph                                                                    |
| 1700015F17Rik           | 2010012O05Rik                       | Agap2                                                                    |
| 1700019E08Rik           | 2010106E10Rik                       | Agbl5                                                                    |
| 1700019E19Rik           | 2010204K13Rik                       | Agpat6                                                                   |
| 1700020C11Rik           | 2010205A11Rik /// EG628498 /// ENSM | Agrp                                                                     |
| 1700021C14Rik           | 2200001I15Rik                       | Ahctf1                                                                   |
| 1700021K14Rik           | 2210010C04Rik                       | Ahdc1                                                                    |
| 1700022C21Rik           | 2210016F16Rik                       | Ahl1                                                                     |
| 1700023F06Rik           | 2210016L21Rik                       | Ahnak                                                                    |
| 1700024G10Rik           | 2210023G05Rik                       | Aip                                                                      |
| 1700024N20Rik           | 2210407C18Rik                       | Aire                                                                     |
| 1700026D08Rik           | 2210409E12Rik                       | Akap12                                                                   |
| 1700027J05Rik           | 2210418O10Rik                       | Akap2                                                                    |
| 1700029F09Rik           | 2310005E10Rik                       | Akap9                                                                    |
| 1700029I15Rik           | 2310010J17Rik                       | Akna                                                                     |
| 1700034J04Rik           | 2310010M24Rik                       | Akt1                                                                     |
| 1700049G17Rik           | 2310014G06Rik                       | Alas1                                                                    |
| 1700052K11Rik           | 2310031A07Rik                       | Alcam                                                                    |
| 1700061J05Rik           | 2310034C09Rik                       | Aldh18a1                                                                 |
| 1700063I17Rik           | 2310038H17Rik                       | Alg3                                                                     |
| 1700065D16Rik           | 2310039H08Rik                       | Alk                                                                      |
| 1700081D17Rik           | 2310057J18Rik//2310065H11Rik        | Alox12                                                                   |
| 1700081L11Rik           | 2310061J03Rik                       | Alpl                                                                     |
| 1700094C10Rik           | 2310067B10Rik                       | Alplp2                                                                   |
| 1700101E01Rik           | 2310067E19Rik                       | Ambra1                                                                   |
| 1700106N22Rik           | 2310075K07Rik                       | Amh                                                                      |
| 1700110K17Rik           | 2410015M20Rik                       | Amn                                                                      |
| 1700113I22Rik           | 2410025L10Rik                       | Amot                                                                     |
| 1700120B22Rik           | 2410133F24Rik//Man2c1os             | Ampd2                                                                    |
| 1700124K17Rik           | 2510009E07Rik                       | Anapc7                                                                   |
| 1810010H24Rik           | 2610001J05Rik                       | Angpt4                                                                   |
| 1810020D17Rik           | 2610002J02Rik                       | Ank1                                                                     |
| 1810020G14Rik           | 2610002M06Rik//Chmp1b               | Ankhd1                                                                   |
| 1810029B16Rik           | 2610005L07Rik                       | Ankrd17                                                                  |
| 1810031K17Rik           | 2610018G03Rik                       | Ankrd24                                                                  |
| 1810032O08Rik           | 2610019E17Rik//Rab26os              | Ankrd33                                                                  |
| 1810034K20Rik           | 2610034M16Rik                       | Ankrd36                                                                  |
| 1810044A24Rik           | 2610042L04Rik//4930555G01Rik//D85   | Anp32a                                                                   |
| 1810046J19Rik           | 2610201A13Rik                       | Anp32e                                                                   |
| 1810063B05Rik           | 2610301B20Rik                       | Anxa8                                                                    |
| 1810064F22Rik           | 2610301F02Rik                       | Anxa9                                                                    |
| 1810065E05Rik           | 2610507B11Rik                       | Ap1g1                                                                    |
| 1810073N04Rik           | 2610524H06Rik                       | Ap1s3                                                                    |
| 2010001M09Rik           | 2610528A11Rik                       | Ap2b1                                                                    |
| 2010106G01Rik           | 2700046A07Rik                       | Ap2m1                                                                    |
| 2010109A12Rik           | 2700079J08Rik                       | Ap3m2                                                                    |
| 2010109K11Rik           | 2700089E24Rik                       | Ap4m1                                                                    |
| 2010111I01Rik           | 2810002D19Rik                       | Ap4s1                                                                    |
| 2010208K18Rik           | 2810025M15Rik                       | Apjp                                                                     |
| 2010209O12Rik           | 2810040C05Rik                       | Apobec1                                                                  |
| 2210018M11Rik           | 2810408B13Rik                       | Apoc1                                                                    |
| 2210038L17Rik           | 2810408M09Rik                       | Apoc2                                                                    |
| 2210407C18Rik           | 2810408M09Rik//Trp53rk              | Apoc4                                                                    |
| 2210408F21Rik           | 2810417H13Rik                       | Apod                                                                     |
| 2210411K11Rik           | 2810428I15Rik                       | App                                                                      |
| 2300002D11Rik           | 2810439F02Rik                       | Aptx                                                                     |
| 2300003K06Rik           | 2810449G22Rik                       | Aqp8                                                                     |
| 2310003F16Rik           | 2810459M11Rik                       | Arf3                                                                     |
| 2310003H01Rik           | 2810474O19Rik                       | Arf4                                                                     |
| 2310004N24Rik           | 2900054C01Rik                       | Arf6                                                                     |
| 2310005N01Rik           | 2900076A13Rik                       | Arhgap24                                                                 |
| 2310016E02Rik           | 2900078E11Rik /// Cadm2             | Arhgap29                                                                 |
| 2310021P13Rik           | 2900097C17Rik                       | Arhgap30                                                                 |
| 2310022A10Rik           | 3021401C12Rik                       | Arhgap31                                                                 |
| 2310026E23Rik           | 3110007F17Rik                       | Arhgef16                                                                 |
| 2310030G06Rik           | 3110057O12Rik                       | Arhgef2                                                                  |
| 2310030N02Rik           | 3110057O12Rik//Gm2011               | Arhgef7                                                                  |
| 2310033K02Rik           | 3110070M22Rik                       | Arid1a                                                                   |
| 2310035C23Rik           | 3110079O15Rik                       | Arid3b                                                                   |
| 2310043M15Rik           | 3632451O06Rik                       | Arid4b                                                                   |
| 2310044G17Rik           | 4632413I24Rik                       | Arid5b                                                                   |
| 2310046O06Rik           | 4632415L05Rik                       | Arl1                                                                     |
| 2310047D13Rik           | 4632428N05Rik                       | Arl2bp                                                                   |
| 2310047M10Rik           | 4732474O15Rik                       | Arl4d                                                                    |

|               |                                    |               |
|---------------|------------------------------------|---------------|
| 2310061N02Rik | 4832441B07Rik                      | Arl6ip6       |
| 2310065K24Rik | 4833422C13Rik                      | Arl8b         |
| 2310066E14Rik | 4833423E24Rik                      | Armc1         |
| 2310067B10Rik | 4833439L19Rik                      | Armc6         |
| 2310079F23Rik | 4921505C17Rik                      | Arnt          |
| 2400003C14Rik | 4921511H03Rik                      | Arntl2        |
| 2410002M20Rik | 4921521F21Rik                      | Arpc4         |
| 2410002O22Rik | 4921524J17Rik                      | Arrdc3        |
| 2410003K15Rik | 4921530L21Rik                      | Arsg          |
| 2410004F06Rik | 4921536K21Rik                      | Art2a-ps      |
| 2410004L22Rik | 4922502D21Rik                      | Art2b         |
| 2410015M20Rik | 4930413G21Rik                      | Asah2         |
| 2410015N17Rik | 4930414L22Rik                      | Asb13         |
| 2410018G20Rik | 4930420K17Rik                      | Ascc2         |
| 2410018L13Rik | 4930427A07Rik                      | Ascl1         |
| 2410081M15Rik | 4930429B21Rik                      | Asf1a         |
| 2410127E18Rik | 4930430E16Rik                      | Aspa          |
| 2410141K09Rik | 4930432F04Rik                      | Atf2          |
| 2510009E07Rik | 4930433N12Rik                      | Atf5          |
| 2510048L02Rik | 4930447C04Rik                      | Atf7          |
| 2600001A11Rik | 4930449I24Rik///Gm3402///Gm6309/// | Atg2a         |
| 2600010E01Rik | 4930453N24Rik                      | Atg3          |
| 2610001J05Rik | 4930470P17Rik                      | Atn1          |
| 2610019A05Rik | 4930483J18Rik                      | Atox1         |
| 2610020H08Rik | 4930500M09Rik///4930500M09Rik//UI  | Atp1a1        |
| 2610028H24Rik | 4930507D05Rik                      | Atp1a2        |
| 2610029G23Rik | 4930524B15Rik                      | Atp1b1        |
| 2610036D13Rik | 4930535I16Rik                      | Atp1b2        |
| 2610044O15Rik | 4930544G11Rik                      | Atp2a1        |
| 2610101N10Rik | 4930549C01Rik                      | Atp6v1b1      |
| 2610109H07Rik | 4930550L24Rik                      | Atp6v1e1      |
| 2610307P16Rik | 4930562D21Rik                      | Atp6v1g2      |
| 2610507B11Rik | 4930570C03Rik                      | Atp8a1        |
| 2610528E23Rik | 4930589M24Rik                      | Atp8b2        |
| 2700019D07Rik | 4930591A17Rik                      | Atpif1        |
| 2700029M09Rik | 4931406G06Rik///4931406G06Rik      | Atr           |
| 2700038N03Rik | 4931406H21Rik                      | Auh           |
| 2700045P11Rik | 4931417E11Rik                      | Aup1          |
| 2700049P18Rik | 4931432E15Rik                      | Auts2         |
| 2700060E02Rik | 4932438H23Rik                      | Axin1         |
| 2700062C07Rik | 4932441J04Rik                      | Axl           |
| 2700078E11Rik | 4933400A11Rik                      | Azin1         |
| 2700078K21Rik | 4933407K13Rik                      | B230118H07Rik |
| 2810001G20Rik | 4933411G06Rik                      | B230217C12Rik |
| 2810006K23Rik | 4933411K20Rik                      | B3gnt2        |
| 2810007J24Rik | 4933415F23Rik                      | B3gnt3        |
| 2810008M24Rik | 4933417A18Rik                      | B4galnt2      |
| 2810025M15Rik | 4933417O08Rik                      | B4galnt3      |
| 2810030E01Rik | 4933421I07Rik                      | B9d1          |
| 2810403A07Rik | 4933424G05Rik                      | B9d2          |
| 2810408A11Rik | 4933425L06Rik                      | BC005624      |
| 2810410M20Rik | 4933428G20Rik                      | BC006965      |
| 2810417H13Rik | 4933429H19Rik                      | BC018242      |
| 2810432D09Rik | 4933434I20Rik                      | BC021614      |
| 2810439F02Rik | 4933436I01Rik                      | BC028528      |
| 2810451A06Rik | 4933439C10Rik                      | BC031181      |
| 2810474O19Rik | 5031439G07Rik                      | BC031353      |
| 2810485I05Rik | 5033414K04Rik                      | BC051212      |
| 2900006K08Rik | 5330433J24Rik                      | Bace1         |
| 2900009I07Rik | 5430417L22Rik                      | Bach2         |
| 2900010M23Rik | 5430421F17Rik                      | Bai3          |
| 2900073G15Rik | 5430421N21Rik                      | Baiap2        |
| 2900092E17Rik | 5730408K05Rik//Mir5136             | Bak1          |
| 3110003A17Rik | 5730493B19Rik                      | Bambi         |
| 3110009E18Rik | 5830405N20Rik                      | Barx1         |
| 3110031B13Rik | 5830411I07Rik                      | Baz1b         |
| 3110049J23Rik | 5830428H23Rik                      | Bbc3          |
| 3110057O12Rik | 5830468K08Rik                      | Bbx           |
| 3222402P14Rik | 6030419C18Rik                      | Bcan          |
| 3230401D17Rik | 6030442H21Rik                      | Bcar1         |
| 3300001P08Rik | 6030458C11Rik                      | Bcas3         |
| 3300002A11Rik | 6330403K07Rik                      | Bcat1         |
| 3425401B19Rik | 6330406I15Rik                      | Bcat2         |
| 3930401K13Rik | 6330416G13Rik                      | Bckdhh        |
| 3930402G23Rik | 6330509M05Rik//SIc9a7              | Bcl11a        |
| 4121402D02Rik | 6430548M08Rik                      | Bcl2l1        |
| 4432412L15Rik | 6430550H21Rik                      | Bcl2l14       |
| 4631416L12Rik | 6430573F11Rik                      | Bcl2l2        |
| 4631426J05Rik | 6430704M03Rik                      | Bcl3          |
| 4631427C17Rik | 6720401G13Rik                      | Bcl6          |
| 4632411B12Rik | 6720418B01Rik                      | Bcl7b         |
| 4632411J06Rik | 6720458F09Rik                      | Bcl9          |
| 4632415K11Rik | 6720475J19Rik                      | Bdkrb1        |
| 4632419I22Rik | 8430419K02Rik                      | Bdnf          |
| 4632434I11Rik | 8430419L09Rik                      | Bfar          |
| 4733401H18Rik | 8430420F16Rik                      | Bin1          |
| 4831426I19Rik | 9030409G11Rik                      | Birc6         |
| 4833401D15Rik | 9030624J02Rik                      | Bmf           |
| 4833420G17Rik | 9130004C02Rik                      | Bmi1          |
| 4833427G06Rik | 9230009I02Rik                      | Bmp1          |
| 4833436C18Rik | 9230115E21Rik                      | Bmp3          |
| 4833442J19Rik | 9330159F19Rik                      | Bmp4          |
| 4921526F01Rik | 9330182L06Rik                      | Bnc2          |
| 4921528H16Rik | 9430015G10Rik                      | Bnip3         |
| 4921530D09Rik | 9530002B09Rik                      | Bola2         |
| 4921533L14Rik | 9530053H05Rik                      | Bpil2         |
| 4922502B01Rik | 9530068E07Rik                      | Bpnt1         |
| 4922505G16Rik | 9630023C09Rik                      | Bptf          |
| 4930405O22Rik | 9630027E11 /// Grik3               | Brap          |
| 4930408O21Rik | 9630041G16Rik                      | Brcs1         |
| 4930415O20Rik | 9830134C10Rik                      | Brd2          |
| 4930421P07Rik | A                                  | Brd4          |
| 4930427A07Rik | A030004J04Rik                      | Brd8          |
| 4930429B21Rik | A030005K14Rik                      | Brdt          |
| 4930430E16Rik | A130010J15Rik                      | Brsk1         |
| 4930451C15Rik | A230006K03Rik//LOC102633679        | Brwd1         |
| 4930452B06Rik | A230046K03Rik                      | Bsg           |
| 4930455C21Rik | A230050P20Rik                      | Btbd2         |
| 4930455G09Rik | A2m                                | Btg4          |
| 4930471M09Rik | A330021E22Rik                      | Btn1a1        |
| 4930471M23Rik | A330068G13Rik                      | Btrc          |
| 4930473A06Rik | A330076H08Rik                      | Bub3          |
| 4930504E06Rik | A330076H08Rik,Mir344g              | Bud31         |
| 4930504H06Rik | A430001F24Rik                      | Bysl          |
| 4930507D10Rik | A430104N18Rik//Mir142              | C1galt1c1     |
| 4930511I11Rik | A4galnt                            | C1qb          |
| 4930513N10Rik | A530016L24Rik                      | C1qc          |
| 4930519B02Rik | A630005I04Rik                      | C1qtnf6       |
| 4930527J03Rik | A630033E08Rik                      | C3            |
| 4930535B03Rik | A630033H20Rik                      | C87436        |
| 4930535E21Rik | A630038E17Rik                      | Cab39l        |
| 4930546H06Rik | A630072M18Rik                      | Cabp4         |
| 4930553M12Rik | A730028G07Rik                      | Cacna1a       |
| 4930555I21Rik | A730034C02//Map2                   | Cacna1c       |
| 4930566A11Rik | A730054J21Rik                      | Cacna1g       |
| 4930570C03Rik | A730082K24Rik                      | Cacna1h       |
| 4930572J05Rik | A830059I20Rik                      | Cacnb2        |
| 4930578M01Rik | A930012O16Rik                      | Cacnb3        |
| 4930578N16Rik | AA407107                           | Cacng3        |
| 4930579G24Rik | AA407331                           | Cacng4        |
| 4931406I20Rik | AA407782                           | Cadm3         |
| 4931417G12Rik | AA408251                           | Cadps2        |
| 4931433A01Rik | AA408954                           | Calb1         |
| 4932412D23Rik | AA409316                           | Calb2         |
| 4932417H02Rik | AA409749                           | Caln1         |
| 4932417I16Rik | AA414903                           | Calr          |
| 4932425I24Rik | AA414993                           | Calu          |
| 4932438H23Rik | AA416453                           | Camk1         |
| 4932442K08Rik | AA511254                           | Camk2d        |
| 4932443I19Rik | AA511261                           | Camk2n1       |
| 4933400C05Rik | AA516738                           | Camk2n2       |
| 4933404M19Rik | AA517023                           | Cand1         |
| 4933407I08Rik | AA517562                           | Canx          |
| 4933413G19Rik | AA517650                           | Capn3         |
| 4933421E11Rik | AA517841                           | Caprin1       |
| 4933422H20Rik | AA517858                           | Car11         |
| 4933424B01Rik | AA517864                           | Car3          |
| 4933425L03Rik | AA522020                           | Car9          |
| 4933426K21Rik | AA536748                           | Cars          |

|               |                                   |          |
|---------------|-----------------------------------|----------|
| 4933427D14Rik | AA545190                          | Cblb     |
| 4933428G20Rik | AA589418                          | Cblc     |
| 4933430I17Rik | AA672641                          | Cbl11    |
| 4933431K23Rik | AA675344                          | Cbx1     |
| 4933432B09Rik | AB041806                          | Cbx3     |
| 4933434I06Rik | AF366264                          | Cbx5     |
| 4933438A12Rik | AI118078                          | Cbx6     |
| 4933439F11Rik | AI317395                          | Ccdc106  |
| 5031425E22Rik | AI413582                          | Ccdc12   |
| 5133400G04Rik | AI450241                          | Ccdc53   |
| 5133401N09Rik | AI503316///Hnrnpu                 | Ccdc88a  |
| 5330429B09Rik | AI504432                          | Ccdc91   |
| 5330431N19Rik | AI506816                          | Ccdc97   |
| 53BP1         | AI596198                          | Ccl22    |
| 5730403B10Rik | AI646383                          | Ccl25    |
| 5730409E15Rik | AI661453                          | Ccnd2    |
| 5730410I19Rik | AI662270                          | Ccnd3    |
| 5730437N04Rik | AI844685                          | Ccnt1    |
| 5730442P18Rik | AK009121                          | Ccr10    |
| 5730453I16Rik | AK010638///Gm14820///Gm14820      | Ccr9     |
| 5730559C18Rik | AK077428                          | Ccrl2    |
| 5730593F17Rik | AK138291                          | Cct3     |
| 5730596K20Rik | AK201917///Vdac1                  | Cct6b    |
| 5830415F09Rik | AK213652                          | Cd14     |
| 5830416A07Rik | ASAP3                             | Cd24a    |
| 5830427D03Rik | AU016916                          | Cd27a    |
| 5830434P21Rik | AU018091                          | Cd2bp2   |
| 5830444B04Rik | AU018829///Gm16367///Gm3139///Grr | Cd37     |
| 5830483C08Rik | AU020206                          | Cd47     |
| 5930403L14Rik | AU021092                          | Cd80     |
| 5930416I19Rik | AU022245                          | Cdad1    |
| 5S_rRNA       | AU040096                          | Cdc27    |
| 6030408C04Rik | AU040320                          | Cdc37    |
| 6030422M01Rik | AW049604                          | Cdc42    |
| 6030441H18Rik | AW112010                          | Cdc42ep4 |
| 6030445D17Rik | AW121567                          | Cdc7     |
| 6030458C11Rik | AW209491                          | Cdc73    |
| 6030498E09Rik | AW551984                          | Cdca3    |
| 6230409E13Rik | Aacs                              | Cdca5    |
| 6230416J20Rik | Aaed1                             | Cdh10    |
| 6230427J02Rik | Aak1                              | Cdh18    |
| 6330442E10Rik | Aamdc                             | Cdh22    |
| 6330514A18Rik | Aamp                              | Cdh5     |
| 6330548G22Rik | Aanat                             | Cdh8     |
| 6330577E15Rik | Aar2                              | Cdk5rap3 |
| 6430502M16Rik | Aard                              | Cdkl2    |
| 6430527G18Rik | Aars                              | Cdkn1a   |
| 6430598A04Rik | Aass                              | Cdkn2a   |
| 6430701C03Rik | Aatk                              | Cdr2l    |
| 6430706D22Rik | Abat                              | Cdx2     |
| 6620401K05Rik | Abca1                             | Cecr5    |
| 6720456B07Rik | Abca8a                            | Cela1    |
| 6820408C15Rik | Abca9                             | Cep164   |
| 6820431F20Rik | Abcb10                            | Cep170   |
| 7420416P09Rik | Abcb11                            | Cep55    |
| 7530404M11Rik | Abcb1a                            | Cep5711  |
| 7SK           | Abcb1b                            | Cep70    |
| 8430406I07Rik | Abcb4                             | Cerk     |
| 8430410K20Rik | Abcb6                             | Cfl1     |
| 8430415E04Rik | Abcb7                             | Chchd3   |
| 8430416H19Rik | Abcb8                             | Chd4     |
| 8430427H17Rik | Abcb9                             | Chgb     |
| 8430437L04Rik | Abcc10                            | Chid1    |
| 9030025P20Rik | Abcc2                             | Chka     |
| 9030409G11Rik | Abcc3                             | Chn2     |
| 9130017N09Rik | Abcc5                             | Chrd     |
| 9130023H24Rik | Abcc6                             | Chrna1   |
| 9130221H12Rik | Abcc8                             | Chrn4    |
| 9130404D08Rik | Abcc9                             | Cic      |
| 9130404D14Rik | Abcd1                             | Cidec    |
| 9130409J20Rik | Abcd2                             | Cirbp    |
| 9230105E05Rik | Abcd4                             | Cish     |
| 9230112D13Rik | Abce1                             | Clif     |
| 9330175E14Rik | Abcf1                             | Clasp1   |
| 9430016H08Rik | Abcf2                             | Clcf1    |
| 9430024E24Rik | Abcf3                             | Clcn1    |
| 9430057O19Rik | Abcg1                             | Clcn2    |
| 9430076C15Rik | Abcg2                             | Clcn3    |
| 9530015I07Rik | Abcg3                             | Clcn4-2  |
| 9530027J09Rik | Abcg4                             | Clcnka   |
| 9530048O09Rik | Abcg5                             | Clcnkb   |
| 9530052E02Rik | Abhd10                            | Cldn15   |
| 9630008K15Rik | Abhd11os                          | Cldn23   |
| 9630033F20Rik | Abhd12                            | Clec2h   |
| 9630041N07Rik | Abhd14a                           | Clmn     |
| 9830169C18Rik | Abhd14b                           | Clstr1   |
| A130010J15Rik | Abhd15                            | Clstr3   |
| A130042E20Rik | Abhd16a                           | Cmtm7    |
| A130092J06Rik | Abhd2                             | Cmtm8    |
| A230054D04Rik | Abhd3                             | Cnih3    |
| A230069A22Rik | Abhd8                             | Cnn2     |
| A230083G16Rik | Abi3bp                            | Cnnm2    |
| A230097K15Rik | Abl1                              | Cnot2    |
| A230106M15Rik | Acaa1a///Acaa1b                   | Cnot4    |
| A230107C01Rik | Acaa1b                            | Cnot6l   |
| A330008L17Rik | Acacb                             | Cnp      |
| A430093A21Rik | Acad8                             | Cntfr    |
| A430106J12Rik | Acadl                             | Cntn4    |
| A530013C23Rik | Acadsb                            | Cntnap1  |
| A530020G20Rik | Acan                              | Col11a2  |
| A630001G21Rik | Acbd3                             | Col13a1  |
| A630007B06Rik | Acd                               | Col16a1  |
| A630047E20Rik | Ace                               | Col17a1  |
| A730008H23Rik | Ace2                              | Col19a1  |
| A830018L16Rik | Acer2                             | Col1a1   |
| A830023I12Rik | Ache                              | Col2a1   |
| A930011G23Rik | Acin1                             | Col5a2   |
| A930037G23Rik | Ackr1                             | Comm45   |
| A930038C07Rik | Ackr4                             | Comm47   |
| AA415398      | Acly                              | Comp     |
| AA536717      | Acnat2                            | Comtd1   |
| AA645442      | Aco1                              | Cops5    |
| AA986860      | Aco2                              | Cops6    |
| AC103388.1    | Acot11                            | Coq3     |
| AC109145.1    | Acot3                             | Coq5     |
| AC111115.1    | Acot4                             | Cotl1    |
| AC113178.1    | Acot5                             | Cox17    |
| AC113291.1    | Acot6                             | Cox8a    |
| AC114613.1    | Acox2                             | Cp       |
| AC116595.1    | Acox3                             | Cpeb3    |
| AC122860.1    | Acp1                              | Cpeb4    |
| AC124613.1    | Acp2                              | Cpne2    |
| AC124745.1    | Acpp                              | Cpne4    |
| AC125186.1    | Acr                               | Crabp2   |
| AC132266.1    | Acrbp                             | Creb1    |
| AC134576.1    | Acrv1                             | Creb3    |
| AC137692.1    | Acsf2                             | Creb5    |
| AC147047.1    | Acsf4                             | Crhr1    |
| AC149605.1    | Acsf6                             | Crtc2    |
| AC157101.1    | Acsm2                             | Cryab    |
| AC157912.1    | Acss1                             | Cryz11   |
| AC158667.1    | Acss2                             | Csf1     |
| AC163694.1    | Acss3                             | Csnk1a1  |
| AC165159.1    | Acta1                             | Cspp1    |
| AC167197.1    | Acta2                             | Csrp3    |
| AC173478.1    | Actb                              | Ctbp2    |
| ACSS1         | Actc1                             | Ctcf     |
| ACSS2         | Actc1 /// LOC100048431            | Ctnna1   |
| ACTB          | Actg2                             | Ctnna2   |
| ACTG2         | Actn1                             | Ctrl     |
| ACTL6A        | Actn2                             | Ctsb     |
| ADAMTS13      | Actn3                             | Cuedc1   |
| ADAMTS6       | Actr10                            | Cuedc2   |
| ADCK4         | Actr1a                            | Cul2     |
| ADSS          | Actrt1                            | Cuta     |
| AF060570      | Actrt2                            | Cxcl1    |
| AF380425      | Acvr1                             | Cxcl12   |
| AFF3          | Acvr1b                            | Cygb     |
| AGK           | Acvr2b                            | Cyhr1    |

|          |                   |               |
|----------|-------------------|---------------|
| AI314180 | Acvrl1            | Cyp2j13       |
| AI317237 | Acy1              | Cyp4f16       |
| AI317395 | Acy3              | Cyp4v3        |
| AI413782 | Acyp1             | Cyp7b1        |
| AI427122 | Acyp2             | Cyr61         |
| AI450540 | Ada               | D030011O10Rik |
| AI461788 | Adad1             | D17Wsu92e     |
| AI593442 | Adam10            | D930048N14Rik |
| AI606473 | Adam11            | Dab1          |
| AI661453 | Adam12            | Dab2          |
| AI842396 | Adam15            | Dagla         |
| AI846148 | Adam18            | Dand5         |
| AI848100 | Adam19            | Dbndd1        |
| AI851790 | Adam1a            | Dbp           |
| AICDA    | Adam1b            | Dcakd         |
| AIM2     | Adam21            | Dck           |
| AK002838 | Adam22            | Dclk1         |
| AK002860 | Adam26a           | Dcps          |
| AK002929 | Adam28            | Dcun1d4       |
| AK003793 | Adam3             | Ddah1         |
| AK003812 | Adam33            | Ddah2         |
| AK003841 | Adam34            | Ddc           |
| AK004434 | Adam4             | Ddit3         |
| AK004727 | Adam5             | Ddr1          |
| AK005115 | Adam7             | Ddx18         |
| AK005418 | Adam8             | Ddx19b        |
| AK005503 | Adamts1           | Ddx39         |
| AK005538 | Adamts10          | Dennd4b       |
| AK005651 | Adamts15          | Derl1         |
| AK005754 | Adamts16          | Dgka          |
| AK005757 | Adamts20          | Dgke          |
| AK005784 | Adamts4           | Dhdds         |
| AK005839 | Adamts5           | Dhh           |
| AK005956 | Adamts7           | Dhrs7b        |
| AK005967 | Adamts8           | Dhx58         |
| AK006022 | Adamtsl4          | Dixdc1        |
| AK006051 | Adamtsl5          | Dlat          |
| AK006104 | Adarb2            | Dlg2          |
| AK006186 | Adat1             | Dlg4          |
| AK006239 | Adat3///Scamp4    | Dlgap4        |
| AK006240 | Adck3             | Dlst          |
| AK006245 | Adck4             | Dlx3          |
| AK006343 | Adcy2             | Dmpk          |
| AK006397 | Adcy3             | Dmtf1         |
| AK006409 | Adcy4             | Dnahc2        |
| AK006454 | Adcy6             | Dnaja1        |
| AK006531 | Adcy7             | Dnajc12       |
| AK006540 | Adcy8             | Dnajc2        |
| AK006546 | Adcy9             | Dnajc27       |
| AK006587 | Adcyap1           | Dnali1        |
| AK006607 | Adcyap1r1         | Dnase1l3      |
| AK006748 | Add1              | Dnmt3a        |
| AK006889 | Add2              | Dnmt3b        |
| AK006895 | Add3              | Dock7         |
| AK006942 | Adh1              | Dok1          |
| AK007191 | Adh7              | Dok5          |
| AK007237 | Adi1              | Donson        |
| AK007249 | Adig              | Dpf3          |
| AK007255 | Adipoq            | Dpp6          |
| AK007416 | Adk               | Dqx1          |
| AK007436 | Adm               | Drd2          |
| AK007898 | Adora1            | Dsg1a         |
| AK007998 | Adora2a           | Dst           |
| AK008044 | Adpgk             | Dtx3          |
| AK008222 | Adprh             | Dusp10        |
| AK008665 | Adprm             | Dusp3         |
| AK008705 | Adra1a            | Dvl2          |
| AK008755 | Adra2a            | Dyrk3         |
| AK008833 | Adrb1             | Dyx1c1        |
| AK008852 | Adrb2             | E2f2          |
| AK008907 | Adrb3             | E2f6          |
| AK009121 | Adrbk2            | E2f8          |
| AK009365 | Adrm1             | Eaf2          |
| AK009597 | Adssl1            | Ebf2          |
| AK009785 | Aebp1             | Ebf3          |
| AK009887 | Aen               | Ebi3          |
| AK010427 | Aes               | Ece1          |
| AK010542 | Afap1             | Ece2          |
| AK010793 | Afap1l2           | Efcab2        |
| AK010870 | Aff2              | Efna2         |
| AK010894 | Aff4              | Efna5         |
| AK011222 | Afg3l2            | Efnb2         |
| AK011283 | Afm               | Efnb3         |
| AK011326 | Afp               | Eftud2        |
| AK011568 | Aftph             | Egfr          |
| AK011682 | Agap2             | Egr3          |
| AK011693 | Agbl3             | Ehbp1l1       |
| AK011913 | Agbl5             | Ehd1          |
| AK012035 | Ager              | Ehd2          |
| AK012135 | Ago2              | Eif2ak3       |
| AK012238 | Agpat6            | Eif2c1        |
| AK012325 | Agphd1            | Eif2c3        |
| AK012387 | Agrn              | Eif3h         |
| AK012418 | Agrp              | Eif4e2        |
| AK012506 | Agt               | Eif4g3        |
| AK012572 | Agtpbp1           | Elavl2        |
| AK012891 | Agtr1a            | Elavl3        |
| AK012955 | Agtr1b            | Elk4          |
| AK013356 | Agtr2             | Elov16        |
| AK013380 | Agtrap            | Emilin1       |
| AK013480 | Agxt              | En1           |
| AK013506 | Ahctf1            | Enah          |
| AK014798 | Ahcy              | Eno2          |
| AK014955 | Ahcyl1            | Enoph1        |
| AK014981 | Ahdc1             | Enpp4         |
| AK015004 | Ahi1              | Entpd1        |
| AK015092 | Ahnak             | Eny2          |
| AK015341 | Ahr               | Eomes         |
| AK015384 | Ahrr              | Epb4.1l1      |
| AK015392 | Ahsa2             | Epb4.1l2      |
| AK015395 | Ahsg              | Epb4.1l4a     |
| AK015458 | Aicda             | Epha3         |
| AK015526 | Aida              | Epha5         |
| AK015545 | Aif1              | Epha7         |
| AK015814 | Aif1l             | Ephb1         |
| AK015969 | Aim1              | Ephb2         |
| AK015999 | Aim2              | Ephb4         |
| AK016007 | Aip               | Eral1         |
| AK016077 | Aipl1             | Erbb3         |
| AK016178 | Aire              | Erc1          |
| AK016185 | Airn              | Ergic2        |
| AK016276 | Ajap1             | Erlin1        |
| AK016307 | Ajuba             | Ern1          |
| AK016335 | Ak1               | Espl1         |
| AK016388 | Ak3               | Espn          |
| AK016511 | Ak4               | Esr1          |
| AK016630 | Akap10            | Esr2          |
| AK016693 | Akap12            | Esrp1         |
| AK016837 | Akap17b           | Etf1          |
| AK017125 | Akap2             | Ets1          |
| AK017144 | Akap4             | Etv3          |
| AK017409 | Akap7             | Etv4          |
| AK017459 | Akap8             | Etv5          |
| AK017500 | Akap8l            | Etv6          |
| AK017756 | Akap9             | Evl           |
| AK017779 | Akirin2           | Ewsr1         |
| AK017883 | Akna              | Exosc4        |
| AK017924 | Akp3              | Extl2         |
| AK018074 | Akr1b10           | Extl3         |
| AK018156 | Akr1b3///Gm6644   | Eya3          |
| AK018490 | Akr1b7            | Eya4          |
| AK018772 | Akr1b8            | Ezh1          |
| AK018847 | Akr1c12           | F11r          |
| AK018967 | Akr1c12///Akr1c13 | F2rl1         |
| AK018988 | Akr1c13           | Fa2h          |
| AK018996 | Akr1c14           | Fabp3         |
| AK019053 | Akr1c18           | Fads2         |
| AK019083 | Akr1c20           | Fahd1         |
| AK019114 | Akr1c21           | Fam110c       |

|          |                                  |            |
|----------|----------------------------------|------------|
| AK019124 | Akr1cl                           | Fam111a    |
| AK019137 | Akr1d1                           | Fam20b     |
| AK019154 | Akr7a5                           | Fam49b     |
| AK019365 | Akt1                             | Fam83f     |
| AK019375 | Akt3                             | Fanca      |
| AK019435 | Aktip                            | Fanci      |
| AK019679 | Alas1                            | Farsa      |
| AK019738 | Alas2                            | Fasn       |
| AK019743 | Alcam                            | Fbp1       |
| AK019757 | Aldh18a1                         | Fbxl15     |
| AK019824 | Aldh1a1                          | Fbxo2      |
| AK019844 | Aldh1a2                          | Fbxo27     |
| AK020081 | Aldh1a3                          | Fbxo31     |
| AK020309 | Aldh1b1                          | Fbxo36     |
| AK020388 | Aldh7a1                          | Fbxo4      |
| AK020406 | Aldh8a1                          | Fbxo6      |
| AK020517 | Aldh9a1                          | Fbxo9      |
| AK020549 | Alg1                             | Fbxw7      |
| AK020588 | Alg12                            | Fbxw8      |
| AK020767 | Alg13                            | Fcer1g     |
| AK021028 | Alg14                            | Fcgr1      |
| AK021048 | Alg2                             | Fcgr3      |
| AK021325 | Alg3                             | Fdft1      |
| AK021342 | Alk                              | Fgf11      |
| AK021368 | Alkbh5                           | Fgf12      |
| AK027957 | Alox12                           | Fgf18      |
| AK027991 | Alox15                           | Fgf2       |
| AK028005 | Alpk2                            | Fgf23      |
| AK028224 | Alpk3                            | Fgf4       |
| AK029171 | Alpl                             | Fgfr1      |
| AK029407 | Alppl2                           | Fgfr1op2   |
| AK029443 | Als2                             | Fgfr2      |
| AK029591 | Alx3                             | Fgfr4      |
| AK029605 | Alx4                             | Fgr        |
| AK029624 | Alyref                           | Fign       |
| AK029637 | Alyref///Alyref2                 | Fis1       |
| AK029638 | Ambp                             | Fkbp10     |
| AK029692 | Ambra1                           | Fkbp1a     |
| AK029860 | Amelx                            | Fkbp1b     |
| AK029950 | Amh                              | Fkbp5      |
| AK029956 | Amigo1                           | Ficn       |
| AK030238 | Ammecr1                          | Flot2      |
| AK030281 | Ammecr1l                         | Flt4       |
| AK030763 | Amn                              | Fndc3a     |
| AK030770 | Amot                             | Fntb       |
| AK030920 | Ampd2                            | Fosb       |
| AK031200 | Ampd3                            | Fosl2      |
| AK031204 | Amph                             | Foxb2      |
| AK031278 | Amy1                             | Foxc2      |
| AK031498 | Amy2a1///Amy2a2///Amy2a3///Amy2a | Foxd1      |
| AK031561 | Anapc1                           | Foxd3      |
| AK031871 | Anapc11                          | Foxg1      |
| AK031964 | Anapc16                          | Foxk1      |
| AK032024 | Anapc5                           | Foxm1      |
| AK032343 | Anapc7                           | Foxo1      |
| AK032387 | Ang3                             | Foxo4      |
| AK033134 | Angel2                           | Fpr-rs3    |
| AK034016 | Angpt1                           | Frmf4b     |
| AK034282 | Angpt2                           | Ftsj3      |
| AK035031 | Angpt4                           | Fubp1      |
| AK035085 | Angptl1                          | Fus        |
| AK035466 | Angptl2                          | Fut10      |
| AK035515 | Angptl3                          | Fut9       |
| AK035525 | Angptl4                          | Fxr2       |
| AK035573 | Ank1                             | Fyn        |
| AK035706 | Ankef1                           | Fzd6       |
| AK036329 | Ankhd1                           | Fzd7       |
| AK036422 | Ankmy2                           | Fzd8       |
| AK036982 | Ankrd1                           | G6pc       |
| AK037113 | Ankrd17                          | Gabarap    |
| AK037159 | Ankrd24                          | Gabarapl2  |
| AK037841 | Ankrd26                          | Gabbr1     |
| AK038021 | Ankrd28                          | Gabbrb1    |
| AK038337 | Ankrd33                          | Gabbrb3    |
| AK038627 | Ankrd33b                         | Gad2       |
| AK038992 | Ankrd36                          | Gadd45b    |
| AK039020 | Ankrd46                          | Gadd45g    |
| AK039023 | Ankrd54                          | Gadd45gip1 |
| AK039030 | Ankrd6                           | Gale       |
| AK039117 | Ankrd61                          | Galk1      |
| AK039125 | Anks3                            | Galnt6     |
| AK039132 | Anks6                            | Galr2      |
| AK039372 | Ankzf1                           | Gapdh      |
| AK039373 | Ankzf1///Glb1l                   | Gas1       |
| AK039574 | Ano1                             | Gas2       |
| AK039720 | Ano10                            | Gas5       |
| AK039780 | Ano5                             | Gas8       |
| AK039796 | Anp32a                           | Gast       |
| AK039819 | Anp32e                           | Gata1      |
| AK039862 | Anpep                            | Gata3      |
| AK039882 | Antxr1                           | Gatad2b    |
| AK039958 | Antxr2                           | Gatm       |
| AK040027 | Anxa10                           | Gbf1       |
| AK040172 | Anxa11///Gm2260///Gm2274         | Gbp2       |
| AK040197 | Anxa2                            | Gbp3       |
| AK040272 | Anxa3                            | Gbx2       |
| AK040276 | Anxa5                            | Gca        |
| AK040320 | Anxa6                            | Gcnt2      |
| AK040430 | Anxa8                            | Gda        |
| AK040752 | Anxa9                            | Gdap10     |
| AK040808 | Aoc1                             | Gdap11     |
| AK040967 | Aoc2 /// Aoc3                    | Gdi2       |
| AK040992 | Aoc3                             | Gdpd3      |
| AK041042 | Aof1                             | Gdpd5      |
| AK041537 | Aox3                             | Gfi1b      |
| AK041587 | Aox4                             | Gfpt2      |
| AK041716 | Ap1g1                            | Gfra2      |
| AK041760 | Ap1m1                            | Gga1       |
| AK041781 | Ap1s2                            | Ggnbp2     |
| AK042136 | Ap1s3                            | Ggps1      |
| AK042354 | Ap2a1                            | Ghrh       |
| AK042445 | Ap2a2                            | Gipc2      |
| AK042619 | Ap2b1                            | Gja10      |
| AK042665 | Ap2m1                            | Gjb2       |
| AK042807 | Ap2s1                            | Gjc1       |
| AK043085 | Ap3b2                            | Gkap1      |
| AK043101 | Ap3m1                            | Glb1l      |
| AK043130 | Ap3m2                            | Gldn       |
| AK043242 | Ap3s1                            | Gli1       |
| AK043286 | Ap3s2                            | Gli3       |
| AK043361 | Ap4b1                            | Glipr2     |
| AK043509 | Ap4m1                            | Glis1      |
| AK043659 | Ap4s1                            | Glis2      |
| AK043662 | Ap5m1                            | Glo1       |
| AK043723 | Ap5s1                            | Glul       |
| AK043747 | Apaf1                            | Gm11437    |
| AK043766 | Apba3                            | Gm13889    |
| AK043804 | Apbb1                            | Gm561      |
| AK043844 | Apbb2                            | Gna11      |
| AK043919 | Apc                              | Gnb5       |
| AK043958 | Apc2                             | Gne        |
| AK043964 | Apcdd1                           | Gnl2       |
| AK043991 | Apex2                            | Gnpnat1    |
| AK043994 | Api5                             | Gns        |
| AK044033 | Apip                             | Golm1      |
| AK044242 | Apif                             | Golph3     |
| AK044313 | Apln                             | Golph3l    |
| AK044329 | Aplnr                            | Gpa33      |
| AK044354 | Aplp1                            | Gpaa1      |
| AK044380 | Aplp2                            | Gpatch2    |
| AK044422 | Apoa4                            | Gpc4       |
| AK044435 | Apoa5                            | Gpc6       |
| AK044447 | Apobec1                          | Gpr108     |
| AK044563 | Apobec2                          | Gpr162     |
| AK044623 | Apobec3                          | Gpr177     |
| AK044653 | Apobr                            | Gprc5c     |
| AK044848 | Apoc1                            | Gps1       |
| AK045070 | Apoc2                            | Gpt2       |
| AK045290 | Apoc3                            | Grb14      |

|          |                 |           |
|----------|-----------------|-----------|
| AK045519 | Apoc4           | Grb2      |
| AK045643 | Apod            | Gccc10    |
| AK045681 | Apof            | Grhl2     |
| AK045818 | Apoh            | Grhl3     |
| AK045913 | Apom            | Grid2     |
| AK045951 | App             | Grin2d    |
| AK046224 | Appl2           | Grk4      |
| AK046349 | Aptx            | Grk5      |
| AK046351 | Aqp1            | Grm8      |
| AK046742 | Aqp2            | Gsta4     |
| AK047199 | Aqp3            | Gstm1     |
| AK047243 | Aqp4            | Gtf2a1    |
| AK047309 | Aqp5            | Gtf2h4    |
| AK047366 | Aqp8            | Gtf2i     |
| AK047441 | Aqp9            | Gtf2ird1  |
| AK047727 | Aqr             | Gtf2ird2  |
| AK047916 | Ar              | Gtl3      |
| AK047978 | Arap1           | Gtpbp6    |
| AK047988 | Arap2           | Guca1a    |
| AK048089 | Arap3           | Gylt11b   |
| AK048292 | Areg            | Gzmb      |
| AK048368 | Arf1            | H13       |
| AK048523 | Arf2            | H1f0      |
| AK048630 | Arf3            | H1foo     |
| AK048681 | Arf4            | H2-Ke6    |
| AK049282 | Arf5            | H2-T24    |
| AK049295 | Arf6            | H2afj     |
| AK049860 | Arfgap2         | H6pd      |
| AK049871 | Arg1            | Hamp2     |
| AK050700 | Arg2            | Hax1      |
| AK050707 | Arhgap10        | Hcn2      |
| AK050940 | Arhgap20        | Hcn3      |
| AK051019 | Arhgap24        | Hdc       |
| AK051887 | Arhgap29        | Hdgfrp2   |
| AK052161 | Arhgap30        | Hdgfrp3   |
| AK052319 | Arhgap31        | Hdlbp     |
| AK052590 | Arhgap39        | Heatr2    |
| AK053109 | Arhgap6         | Helb      |
| AK053193 | Arhgap9         | Herc1     |
| AK053270 | Arhgdia         | Herc2     |
| AK053334 | Arhgef10l       | Herc4     |
| AK053590 | Arhgef16        | Hes1      |
| AK053689 | Arhgef2         | Hes7      |
| AK053703 | Arhgef25        | Hfe       |
| AK053722 | Arhgef28        | Hhip      |
| AK053772 | Arhgef40        | Hic1      |
| AK053982 | Arhgef7         | Higd1b    |
| AK054201 | Arhgef9         | Hip1      |
| AK075572 | Arid1a          | Hipk2     |
| AK076253 | Arid3b          | Hipk3     |
| AK076358 | Arid4b          | Hira      |
| AK076396 | Arid5b          | Hist1h1c  |
| AK076606 | Arih2           | Hk1       |
| AK076672 | Arl1            | Hlf       |
| AK076687 | Arl10           | Hmbs      |
| AK076849 | Arl14ep         | Hmg20a    |
| AK076939 | Arl16           | Hmga2     |
| AK076950 | Arl2            | Hmgcl     |
| AK076961 | Arl2bp          | Hmox1     |
| AK077040 | Arl4c           | Hnrnpa1   |
| AK077427 | Arl4d           | Hnrnpa2b1 |
| AK077587 | Arl5a           | Hnrnpl    |
| AK077682 | Arl6            | Hook2     |
| AK077811 | Arl6ip6         | Hormad1   |
| AK078290 | Arl8b           | Hoxa10    |
| AK078307 | Armc1           | Hoxa2     |
| AK078316 | Armc12          | Hoxa9     |
| AK078352 | Armc6           | Hoxb9     |
| AK078363 | Armcx1          | Hoxc4     |
| AK078466 | Armcx2          | Hoxc5     |
| AK078566 | Armcx3          | Hoxc6     |
| AK078937 | Armcx4          | Hoxc8     |
| AK078979 | Armcx6          | Hoxc9     |
| AK079018 | Arnt            | Hoxd1     |
| AK079034 | Arntl           | Hoxd10    |
| AK079730 | Arntl2          | Hoxd3     |
| AK079754 | Arpc1b///Gm5637 | Hoxd8     |
| AK079777 | Arpc4           | Hoxd9     |
| AK079912 | Arpp19          | Hrh1      |
| AK079939 | Arpp21          | Hs2st1    |
| AK080165 | Arr3            | Hs3st1    |
| AK080173 | Arrb1           | Hs3st3b1  |
| AK080176 | Arrb2           | Hsd17b1   |
| AK080292 | Arrdc3          | Hsp90b1   |
| AK080296 | Arsg            | Hspa4     |
| AK080350 | Arsi            | Hspa5     |
| AK080383 | Arsj            | Hspa8     |
| AK080399 | Art2a-ps        | Hspa9     |
| AK080416 | Art2b           | Hspb6     |
| AK080648 | Art5            | Hspb7     |
| AK080857 | Artn            | Hspg2     |
| AK081136 | Arvcf           | Htr6      |
| AK081407 | Arx             | Htra2     |
| AK081796 | Arxes1///Arxes2 | Hyou1     |
| AK082086 | As3mt           | lbtck     |
| AK082264 | Asah2           | Icam2     |
| AK082314 | Asap1           | Icam4     |
| AK082514 | Asb10           | Icam5     |
| AK082624 | Asb11           | Ick       |
| AK082896 | Asb12           | Icosl     |
| AK083021 | Asb13           | Id2       |
| AK083203 | Asb15           | Idi1      |
| AK083994 | Asb17           | Ier5      |
| AK084270 | Asb18           | Ier5l     |
| AK084284 | Asb4            | Ifi35     |
| AK084778 | Asb5            | Ifih1     |
| AK084828 | Asb6            | Ifrd2     |
| AK085125 | Asb7            | Ift122    |
| AK085275 | Asb8            | Ift74     |
| AK085522 | Asb9            | Ift81     |
| AK085912 | Ascc2           | Igf1r     |
| AK085995 | Ascl1           | Igf2      |
| AK086164 | Asf1a           | Igf2bp1   |
| AK086290 | Asgr1           | Igf2bp2   |
| AK086460 | Asic2           | Igf2bp3   |
| AK086741 | Asl             | Igfbp4    |
| AK086852 | Aspa            | Igl1      |
| AK087178 | Asph            | Igsf8     |
| AK087351 | Aspn            | Ikzf2     |
| AK087382 | Asprv1          | Ikzf4     |
| AK087650 | Aspscr1         | Il11      |
| AK088734 | Asrgl1          | Il15ra    |
| AK088743 | Ass1///Gm5424   | Il17a     |
| AK088914 | Astn1           | Il17re    |
| AK088959 | Astn2           | Il18bp    |
| AK089118 | Asz1            | Il1r1     |
| AK089373 | Atad3a          | Il1rap    |
| AK122209 | Atcay           | Il25      |
| AK122525 | Ate1            | Il2ra     |
| AK131719 | Atf2            | Il6ra     |
| AK131739 | Atf5            | Ilf2      |
| AK131819 | Atf6b           | Ilf3      |
| AK131831 | Atf7            | Inhba     |
| AK132123 | Atf7ip2         | Ino80     |
| AK132440 | Atg101          | Inpp1     |
| AK132462 | Atg12           | Inpp4a    |
| AK132658 | Atg2a           | Inpp5a    |
| AK132865 | Atg3            | Ints6     |
| AK132930 | Atg5            | Invs      |
| AK133153 | Atg7            | Ip6k1     |
| AK133227 | Atg9b           | Ipo8      |
| AK133807 | Athl1           | Iqcb1     |
| AK133929 | Ati3            | Iqgap1    |
| AK134400 | Atn1            | Iqgap2    |
| AK134673 | Atoh1           | Iqsec1    |
| AK134717 | Atoh8           | Irf1      |
| AK134749 | Atox1           | Irf6      |
| AK134888 | Atp10a          | Irf8      |
| AK134928 | Atp11a          | Irx4      |

|          |                                   |          |
|----------|-----------------------------------|----------|
| AK135254 | Atp11c                            | Isl1     |
| AK135429 | Atp1a1                            | Isoc2b   |
| AK135766 | Atp1a2                            | Itga2    |
| AK135774 | Atp1a3                            | Itgav    |
| AK135852 | Atp1b1                            | Itgb1    |
| AK135878 | Atp1b2                            | Itgb5    |
| AK136114 | Atp2a1                            | Itm2c    |
| AK136254 | Atp2a3                            | Itpr1    |
| AK136654 | Atp2b2                            | Itpr2    |
| AK136742 | Atp4a                             | Jag1     |
| AK136817 | Atp6v0a1                          | Jak2     |
| AK136919 | Atp6v0a2                          | Jam3     |
| AK137033 | Atp6v0a4                          | Jmjd6    |
| AK137492 | Atp6v1b1                          | Jmy      |
| AK137536 | Atp6v1c1                          | Jph3     |
| AK137552 | Atp6v1e1                          | Junb     |
| AK138212 | Atp6v1g1                          | Kalrn    |
| AK138755 | Atp6v1g2                          | Kcna7    |
| AK138781 | Atp7a                             | Kcnb1    |
| AK139063 | Atp7b                             | Kcnd2    |
| AK139229 | Atp8a1                            | Kcnh2    |
| AK139280 | Atp8b2                            | Kcnh3    |
| AK139295 | Atpif1                            | Kcnp1    |
| AK139424 | Atr                               | Kcnj1    |
| AK139523 | Atraid                            | Kcnj2    |
| AK139607 | Atrip///Trex1                     | Kcnj8    |
| AK139890 | Atrx                              | Kcnk1    |
| AK140090 | Atxn10                            | Kcnma1   |
| AK140178 | Atxn7                             | Kcnn1    |
| AK140192 | Atxn7l3b                          | Kcnn2    |
| AK140218 | Auh                               | Kcnq4    |
| AK140221 | Aup1                              | Kctd17   |
| AK140370 | Aurka                             | Kdelc1   |
| AK140384 | Aurkc                             | Kdelr3   |
| AK140390 | Auts2                             | Keap1    |
| AK140632 | Avp                               | Khdrbs1  |
| AK141411 | Avpr1a                            | Kif11    |
| AK141565 | Avpr1b                            | Kif13a   |
| AK141659 | Axin1                             | Kif17    |
| AK141900 | Axin2                             | Kif1b    |
| AK142074 | Axl                               | Kif1c    |
| AK142161 | Azgp1                             | Kif2a    |
| AK142244 | Azin1                             | Kif5c    |
| AK142386 | B020004J07Rik                     | Kifc2    |
| AK142593 | B130024G19Rik                     | Kiss1r   |
| AK142614 | B230118H07Rik                     | Klc1     |
| AK142681 | B230120H23Rik                     | Klf7     |
| AK143097 | B230215L15Rik                     | Klf9     |
| AK143417 | B230217C12Rik                     | Klhl20   |
| AK143784 | B230219D22Rik                     | Klhl25   |
| AK143926 | B230354K17Rik                     | Klh5     |
| AK143982 | B3galnt1                          | Klrb1b   |
| AK144266 | B3galt1                           | Kpna4    |
| AK144299 | B3galt2                           | Kpnb1    |
| AK144330 | B3galt5                           | Kras     |
| AK144367 | B3galt6                           | Kremen1  |
| AK144485 | B3gat1                            | Krt10    |
| AK144536 | B3gnt1                            | Krt15    |
| AK144545 | B3gnt2                            | Krt20    |
| AK144571 | B3gnt3                            | Krt28    |
| AK144610 | B3gnt4                            | Krt8     |
| AK144811 | B3gnt5                            | Krtcap2  |
| AK144829 | B3gnt9                            | Ksr1     |
| AK144852 | B4galnt1                          | Lag3     |
| AK144859 | B4galnt2                          | Lamb2    |
| AK144870 | B4galt2                           | Lamc1    |
| AK144909 | B4galt3                           | Lamc3    |
| AK145113 | B4galt4                           | Lancl2   |
| AK145129 | B4galt6                           | Laptm4a  |
| AK145231 | B4galt6 /// LOC675709             | Laptm5   |
| AK145276 | B4galt7                           | Lasp1    |
| AK145301 | B930003M22Rik                     | Lat2     |
| AK145347 | B930041F14Rik                     | Lats2    |
| AK145360 | B9d1                              | Lbx2     |
| AK145396 | B9d2                              | Lcat     |
| AK146012 | BB144871                          | Lct      |
| AK146407 | BC003331                          | Ldb1     |
| AK146690 | BC005512///F630007L15Rik///Gm6958 | Ldhb     |
| AK147911 | BC005537                          | Lef1     |
| AK148126 | BC005561                          | Leprel2  |
| AK148321 | BC005624                          | Leprotl1 |
| AK148373 | BC005685                          | Lfng     |
| AK149094 | BC006965                          | Lgals1   |
| AK149260 | BC016548                          | Lgals2   |
| AK149295 | BC016579                          | Lgr5     |
| AK149307 | BC017158                          | Lhfp12   |
| AK149321 | BC018242                          | Lhx1     |
| AK149987 | BC018473///BC018473               | Lhx2     |
| AK152002 | BC021614                          | Lhx5     |
| AK153534 | BC022687                          | Lif      |
| AK153849 | BC022960                          | Lig3     |
| AK153988 | BC023829                          | Limd1    |
| AK154034 | BC025446                          | Limk1    |
| AK154177 | BC025933                          | Lipg     |
| AK154275 | BC027072                          | Lman1    |
| AK154427 | BC028528                          | Lmna     |
| AK155149 | BC028777                          | Lmnb2    |
| AK155239 | BC031181                          | Loxl3    |
| AK155592 | BC031353                          | Lpgat1   |
| AK155877 | BC038268                          | Lpin3    |
| AK156427 | BC043118                          | Lpxn     |
| AK156477 | BC051019                          | Lrba     |
| AK157237 | BC051142                          | Lrig1    |
| AK157519 | BC051212                          | Lrp1     |
| AK157788 | BC053393                          | Lrp1b    |
| AK157795 | BC065403                          | Lrp8     |
| AK157878 | BC089491                          | Lrrc20   |
| AK157916 | BC089597                          | Lrrc46   |
| AK157963 | BC094435                          | Lrrc59   |
| AK158018 | BC094435///Ccrn4///Cog6///Sgip1   | Lrrc6    |
| AK158030 | BC100451                          | Lrrc8e   |
| AK158244 | BC100530 /// Stfa1 /// Stfa3      | Lrrk2    |
| AK158379 | BICC1                             | Lrrn1    |
| AK158414 | Baalc                             | Lrrtm1   |
| AK158854 | Baat                              | Lrrtm3   |
| AK160141 | Bace1                             | Lsamp    |
| AK160260 | Bace2                             | Lsm2     |
| AK160502 | Bach2                             | Lss      |
| AK161079 | Bad                               | Lta4h    |
| AK161406 | Bag5                              | Ltb4r1   |
| AK161459 | Bai1                              | Ltbp2    |
| AK161599 | Bai2                              | Ltbp3    |
| AK162363 | Bai3                              | Ltbp4    |
| AK162386 | Baiap2                            | Luc7l2   |
| AK162870 | Baiap2l1                          | Ly6a     |
| AK162906 | Baiap3                            | Lyrn2    |
| AK162930 | Bak1                              | Lyrn5    |
| AK163067 | Bambi                             | Mab21l2  |
| AK163149 | Banf1                             | Mad1l1   |
| AK163160 | Barx1                             | Mad2l2   |
| AK163429 | Basp1                             | Madd     |
| AK163667 | Batf                              | Maff     |
| AK163710 | Batf3                             | Mageb3   |
| AK163711 | Baz1b                             | Magi1    |
| AK164126 | Bbc3                              | Magi3    |
| AK164218 | Bbip1                             | Man1a    |
| AK164420 | Bbx                               | Manbal   |
| AK164611 | Bcan                              | Map2k7   |
| AK164650 | Bcap31                            | Map3k14  |
| AK164779 | Bcar1                             | Map3k3   |
| AK164829 | Bcas3                             | Map3k7   |
| AK165089 | Bcat1                             | Map4k1   |
| AK165329 | Bcat2                             | Mapk14   |
| AK165776 | Bche                              | Mapk8ip2 |
| AK166079 | Bckdhb                            | Mapk9    |
| AK166453 | Bcl10                             | Mapkap1  |
| AK167137 | Bcl11a                            | Mapre2   |
| AK168184 | Bcl2                              | Mapt     |
| AK168746 | Bcl2a1a /// Bcl2a1b /// Bcl2a1d   |          |

|            |                                       |          |
|------------|---------------------------------------|----------|
| AK169958   | Bcl2a1a///Bcl2a1b///Bcl2a1c///Bcl2a1d | Marcks   |
| AK170078   | Bcl2a1a///Bcl2a1b///Bcl2a1d           | Marcks11 |
| AK171117   | Bcl2l1                                | Mark2    |
| AK173072   | Bcl2l10                               | Mark4    |
| AK177174   | Bcl2l11                               | Marveld1 |
| AK177718   | Bcl2l14                               | Mast1    |
| AK178562   | Bcl2l2                                | Mastl    |
| AK180911   | Bcl3                                  | Mat1a    |
| AK183279   | Bcl6                                  | Mat2a    |
| AK184225   | Bcl7b                                 | Mbd3     |
| AK184603   | Bcl9                                  | Mbd4     |
| AK187594   | Bco2                                  | Mcam     |
| AK188991   | Bdh2                                  | Mcfd2    |
| AK191411   | Bdkrb1                                | Mcm3     |
| AK193394   | Bdnf                                  | Mcm5     |
| AK194920   | Bean1                                 | Mcm9     |
| AK195902   | Becn1                                 | Mcoln3   |
| AK197603   | Bex1                                  | Mcts1    |
| AK198984   | Bex4                                  | Me1      |
| AK202663   | Bex6                                  | Med1     |
| AK202794   | Bfar                                  | Med12l   |
| AK203140   | Bfsp1                                 | Med20    |
| AK204799   | Bgn                                   | Med21    |
| AK206637   | Bhlha15                               | Med24    |
| AK207593   | Bhlhe22                               | Med29    |
| AK209600   | Bhlhe40                               | Mef2b    |
| AK213543   | Bhlhe41                               | Mef2d    |
| AK216043   | Bhmt2                                 | Meis2    |
| AK217863   | Bicc1                                 | Meis3    |
| AK218399   | Bicd1                                 | Mesdc1   |
| AK219239   | Bicd2                                 | Mesdc2   |
| AK220484   | Bid                                   | Met      |
| AKT2       | Bik                                   | Mettl1   |
| AL451076.1 | Bin1                                  | Mettl6   |
| AL589870.1 | Birc3                                 | Mfi2     |
| AL732528.1 | Birc6                                 | Mfng     |
| AL772376.2 | Bloc1s6                               | Mfsd11   |
| AL772404.1 | Bmf                                   | Mga      |
| AL808014.1 | Bmi1                                  | Mgat5    |
| ALDH1B1    | Bmp1                                  | Mical2   |
| ALG10      | Bmp10                                 | Mid1     |
| ALG9       | Bmp15                                 | Midn     |
| ALOX5      | Bmp2                                  | Minpp1   |
| ALS2       | Bmp2k                                 | Mif2     |
| AM295304   | Bmp3                                  | Milt10   |
| AMY1A      | Bmp4                                  | Milt11   |
| ANGEL2     | Bmp5                                  | Mix      |
| ANKRD17    | Bmp6                                  | Mxipl    |
| ANP32A     | Bmp7                                  | Mme      |
| AP3S2      | Bmp8a                                 | Mmp16    |
| APOL3      | Bmpr1a                                | Mns1     |
| ARHGDI8    | Bmpr1b                                | Mnt      |
| ARPC2      | Bmx                                   | Mog      |
| ASB8       | Bnc1                                  | Mov10    |
| ATF3       | Bnc2                                  | Moxd1    |
| ATF6       | Bnip2                                 | Mphosph9 |
| ATN1       | Bnip3                                 | Mpi      |
| ATP2A3     | Bnipl                                 | Mpp5     |
| ATP6V0D1   | Boc                                   | Mpp6     |
| ATXN7L2    | Bola1                                 | Mpped2   |
| AU014645   | Bola2                                 | Mpzl2    |
| AU020772   | Boll                                  | Mr1      |
| AU040320   | Bpgm                                  | Mrc1     |
| AU040829   | Bpifa1                                | Mrc2     |
| AURKA      | Bpifa2                                | Mrpl10   |
| AV340375   | Bpifb1                                | Mrpl27   |
| AW047730   | Bpifb5                                | Mrpl34   |
| AW549877   | Bpil2                                 | Mrpl45   |
| AW555464   | Bpnt1                                 | Mrpl51   |
| AY074887   | Bptf                                  | Mrps23   |
| AY512942   | Brap                                  | Mrps33   |
| AY589788   | Brat1                                 | Mrv1     |
| AY589789   | Brca1                                 | Msh2     |
| AY589791   | Brcc3                                 | Msh5     |
| AY590888   | Brd2                                  | Msi1     |
| AY672066   | Brd3                                  | Msl2     |
| AZ2        | Brd4                                  | Msx1     |
| Aaas       | Brd8                                  | Msx3     |
| Aadacl1    | Brdt                                  | Mt1      |
| Aars       | Bre                                   | Mt2      |
| Aars2      | Brinp1                                | Mta2     |
| Aarsl      | Brms1                                 | Mta3     |
| Aatf       | Brox                                  | Mtch2    |
| Aatk       | Brsk1                                 | Mtdh     |
| Abat       | Brwd1                                 | Mtmr2    |
| Abca1      | Brwd3                                 | Mtmr4    |
| Abca17     | Bscl2                                 | Mtpn     |
| Abca3      | Bsg                                   | Muc4     |
| Abca5      | Bst1                                  | Mus81    |
| Abca7      | Bst2                                  | Mxi1     |
| Abca8a     | Btbd1                                 | Myc      |
| Abcb7      | Btbd17                                | Mycbpap  |
| Abcc10     | Btbd2                                 | Mycn     |
| Abcc2      | Btd                                   | Myl4     |
| Abcc5      | Btg4                                  | Mylpf    |
| Abcd4      | Btk                                   | Mynn     |
| Abcf1      | Btn1a1                                | Myo10    |
| Abcf2      | Btnl10                                | Myo15b   |
| Abcf3      | Btrc                                  | Myo1c    |
| Abhd11     | Bub1                                  | Myo1f    |
| Abhd14b    | Bub3                                  | Myo6     |
| Abhd3      | Bud31                                 | Myt1     |
| Abhd4      | Bves                                  | Myzap    |
| Abhd6      | Bysl                                  | Nab2     |
| Abt1       | C030003D03Rik                         | Nav2     |
| Acaa1a     | C030018P15Rik                         | Nbea     |
| Acaca      | C030019I05Rik                         | Nbl1     |
| Acad10     | C030026M15Rik                         | Ncdn     |
| Acadvl     | C030033M12Rik /// Rsf1                | Ncf1     |
| Acbd3      | C030044C12Rik                         | Ncln     |
| Acbd4      | C130026I21Rik///LOC102634528          | Ncoa3    |
| Acbd5      | C130026I21Rik///LOC102638047          | Ncoa7    |
| Accn1      | C130090K23Rik                         | Ndr3     |
| Accn3      | C1d                                   | Ndr4     |
| Accn4      | C1gal1c1                              | Ndufa2   |
| Ache       | C1qb                                  | Ndufa9   |
| Acin1      | C1qbp                                 | Ndufaf4  |
| Aco2       | C1qc                                  | Ndufs8   |
| Acot11     | C1ql3                                 | Nebi     |
| Acot2      | C1qtnf1                               | Nedd4l   |
| Acox1      | C1qtnf2                               | Nedd9    |
| Acox1      | C1qtnf4                               | Nefh     |
| Acp2       | C1qtnf5///Mfrp                        | Nefl     |
| Acp5       | C1qtnf6                               | Nek8     |
| Acp6       | C1qtnf7                               | Nek9     |
| Acsi5      | C1ra                                  | Nell2    |
| Acsm5      | C1ra///C1rb                           | Nes      |
| Accs2      | C1s /// LOC100044326                  | Neu3     |
| Actg1      | C1s1                                  | Neurog2  |
| Actn4      | C2                                    | Nf1      |
| Actr2      | C230052I12Rik                         | Nfat5    |
| Acvr1c     | C230078M08Rik                         | Nfe2     |
| Acvrl1     | C2cd2l                                | Nfia     |
| Adam10     | C3                                    | Nfib     |
| Adam15     | C330006A16Rik                         | Nfix     |
| Adam17     | C330007P06Rik                         | Nfkb2    |
| Adam5      | C330027C09Rik                         | Nfu1     |
| Adamts10   | C3ar1                                 | Ninj2    |
| Adamts17   | C430049B03Rik,Mir322,Mir351,Mir503    | Nkd1     |
| Adamts20   | C4a///C4b                             | Nle1     |
| Adamts4    | C4bp                                  | Nlk      |
| Adamts6    | C4bp-ps1                              | Nlme1    |
| Adamts7    | C530030P08Rik                         | Nme2     |
| Adamts4    | C5ar1                                 | Nmt1     |
| Adamts5    | C76132                                | Nodal    |
| Adap1      | C76336                                | Nog      |
| Adar       | C76472                                | Nol6     |
| Adarb1     | C76533                                | Nos1     |
| Adat1      | C76554                                | Nos3     |



|           |                                    |          |
|-----------|------------------------------------|----------|
| Adck3     | C76614                             | Nosip    |
| Adcy2     | C76628                             | Notch4   |
| Adcy8     | C77027                             | Nova1    |
| Adhfe1    | C77137                             | Npas2    |
| Adipoq    | C77144                             | Npas3    |
| Adipor1   | C77370                             | Npas4    |
| Adipor2   | C77405                             | Npepps   |
| Adm       | C77545                             | Nphp1    |
| Adnp      | C77609                             | Nphs1    |
| Adora1    | C77681                             | Npr3     |
| Adpgk     | C77691                             | Nr1d1    |
| Adprh     | C77815                             | Nr1d2    |
| Adra1d    | C78228                             | Nr1h3    |
| Adra2b    | C78441                             | Nr1h4    |
| Adrbk2    | C78444                             | Nr1i3    |
| Adss      | C78513                             | Nr2c2    |
| Aebp2     | C78532                             | Nr2e3    |
| Afap111   | C78651                             | Nr2f2    |
| Aff1      | C78859                             | Nr3c2    |
| Afg3l1    | C78878                             | Nr4a2    |
| Afmid     | C78891                             | Nr4a3    |
| Aftph     | C78948                             | Nr5a1    |
| Agap2     | C79122                             | Nrgn     |
| Agbl5     | C79130                             | Nrip1    |
| Agk       | C79242                             | Nrn1     |
| Agmo      | C79246                             | Nrp1     |
| Agpat2    | C79329                             | Nrp2     |
| Agpat6    | C79452                             | Nrxn1    |
| Agpat7    | C79468                             | Nsdhl    |
| Agps      | C79490                             | Nsun4    |
| Agrp      | C79562                             | Nt5dc3   |
| Agtrl1    | C79709                             | Ntn1     |
| Agxt2l2   | C80060                             | Ntng1    |
| Ahctf1    | C80068                             | Ntrk3    |
| Ahdc1     | C80171                             | Nub1     |
| Ahi-1     | C80256                             | Nudcd1   |
| Ahi1      | C80360                             | Nudt16l1 |
| Ahnak     | C80425                             | Nudt4    |
| Ahsa1     | C80678                             | Numb     |
| Aip       | C80993                             | Nup54    |
| Aire      | C81600                             | Nup62    |
| Akap1     | C86090                             | Nwd1     |
| Akap12    | C86187                             | Nxn      |
| Akap2     | C87436                             | Nxn12    |
| Akap3     | C920021L13Rik//C920021L13Rik       | Nxph1    |
| Akap9     | C920025E04Rik /// H2-T23           | Oasl2    |
| Akna      | C920025E04Rik///H2-T23///LOC102641 | Oat      |
| Akr1a4    | CRTC1                              | Obox3    |
| Akt1      | CSN1S1                             | Odc1     |
| Akt2      | Caap1                              | Odz2     |
| Alad      | Cab39l                             | Oit1     |
| Alas1     | Cabp1                              | Ola1     |
| Alcam     | Cabp2                              | Olfm2    |
| Aldh18a1  | Cabp4                              | Olfm3    |
| Aldh3a1   | Cabyr                              | Olfml3   |
| Aldh3a2   | Cacfd1                             | Olig3    |
| Aldh3b1   | Cacna1a                            | Onecut1  |
| Aldh6a1   | Cacna1b                            | Osbpl1a  |
| Alg3      | Cacna1c                            | Osbpl9   |
| Alg8      | Cacna1d                            | Osr1     |
| Alk       | Cacna1e                            | Osr2     |
| Alkbh4    | Cacna1f                            | Otud4    |
| Alox12    | Cacna1g                            | Otud7b   |
| Alox12e   | Cacna1h                            | Otx2     |
| Aloxe3    | Cacna2d1                           | Ovca2    |
| Alpl      | Cacna2d2                           | P2rx4    |
| Alppl2    | Cacna2d3                           | P4ha1    |
| Als2cr2   | Cacnb2                             | P4hb     |
| Alx1      | Cacnb3                             | Pabpn1   |
| Amac1     | Cacnb4                             | Padi1    |
| Ambra1    | Cacng1                             | Pafah1b2 |
| Amd-ps4   | Cacng2                             | Pafah1b3 |
| Amd2      | Cacng3                             | Pak1     |
| Amh       | Cacng4                             | Palm     |
| Amn       | Cacng5                             | Pard3    |
| Amot      | Cacng7                             | Parp3    |
| Amotl1    | Cacul1                             | Parp9    |
| Ampd2     | Cad                                | Parva    |
| Anapc13   | Cadm2                              | Patz1    |
| Anapc4    | Cadm3                              | Pax3     |
| Anapc7    | Cadps                              | Pax6     |
| Angptl4   | Cadps2                             | Pax7     |
| Ank1      | Calb1                              | Pbx3     |
| Ank2      | Calb2                              | Pbxip1   |
| Ankar     | Calca                              | Pcbd1    |
| Ankyf1    | Calcb                              | Pcdh10   |
| Ankhd1    | Calcoco2                           | Pcgf1    |
| Ankhzn    | Calcr                              | Pcgf2    |
| Ankib1    | Calcr1                             | Pcgf6    |
| Ankra2    | Cald1                              | Pcmt1    |
| Ankrd10   | Calm1///Calm2///Calm3              | Pcnp     |
| Ankrd11   | Calm4                              | Pcnx     |
| Ankrd13b  | Calm4                              | Pcp4     |
| Ankrd13d  | Caln1                              | Pcp4l1   |
| Ankrd17   | Calr                               | Pctk2    |
| Ankrd24   | Calu                               | Pcyt1a   |
| Ankrd33   | Camk1                              | Pde1b    |
| Ankrd34   | Camk1g                             | Pde3a    |
| Ankrd35   | Camk2b                             | Pde3b    |
| Ankrd36   | Camk2d                             | Pde4a    |
| Ankrd40   | Camk2n1                            | Pde4dip  |
| Ankrd45   | Camk2n2                            | Pde6b    |
| Ankrd48   | Camk4                              | Pde6d    |
| Ankrd56   | Camkk2                             | Pde7b    |
| Anp32a    | Camp                               | Pde9a    |
| Anp32e    | Camsap1                            | Pdgfc    |
| Anxa4     | Cand1                              | Pdgfra   |
| Anxa7     | Cant1                              | Pdia3    |
| Anxa8     | Canx                               | Pdlim1   |
| Anxa9     | Cap1                               | Pdlim7   |
| Ap1b1     | Cap2                               | Pdrg1    |
| Ap1g1     | Capn1                              | Pdx1     |
| Ap1g2     | Capn10                             | Pdxk     |
| Ap1s3     | Capn12                             | Pdzrn3   |
| Ap2b1     | Capn15                             | Pemt     |
| Ap2m1     | Capn3                              | Pex13    |
| Ap3d1     | Capn6                              | Pex16    |
| Ap3m2     | Capn8                              | Pex6     |
| Ap4e1     | Capn9                              | Pfkfb2   |
| Ap4m1     | Capns1                             | Pfkl     |
| Ap4s1     | Capns2                             | Pgk2     |
| Apa1      | Caprin1                            | Pglyrp1  |
| Apba2bp   | Capzb                              | Pgm1     |
| Apcs      | Car1                               | Pgm2l1   |
| Apex1     | Car10                              | Phc1     |
| Apip      | Car11                              | Phex     |
| Apobec1   | Car13                              | Phf19    |
| Apoc1     | Car3                               | Phf21a   |
| Apoc2     | Car4                               | Phip     |
| Apoc4     | Car5b                              | Phldb1   |
| Apod      | Car6                               | Phldb2   |
| Apoe      | Car8                               | Phospho2 |
| Apol11a   | Car9                               | Pi4k2a   |
| Apol11b   | Carf                               | Pi4ka    |
| Apol7e    | Carhsp1                            | Pign     |
| App       | Cars                               | Pip4k2c  |
| Aptx      | Cartpt                             | Pip5k1a  |
| Aqp11     | Casd1                              | Pip5k1b  |
| Aqp8      | Casp12                             | Pipox    |
| Arc       | Casp12 /// LOC100044205            | Pitpnc1  |
| Arcn1     | Casp14                             | Pitpnm1  |
| Arf3      | Casp3                              | Pitx2    |
| Arf4      | Casp4                              | Pitx3    |
| Arf6      | Casq2                              | Pkig     |
| Arfgef2   | Casr                               | Pkmyt1   |
| Arfip1    | Catsper1                           | Pknox2   |
| Arfrp1    | Catsperg1                          | Pla1a    |
| Arhgap1   | Cav2                               | Pla2g12a |
| Arhgap11a | Cav3                               | Pla2g6   |

|               |                                      |           |
|---------------|--------------------------------------|-----------|
| Arhgap17      | Cbfa2t3                              | Plaa      |
| Arhgap19      | Cbl                                  | Plagl2    |
| Arhgap21      | Cblb                                 | Plcb2     |
| Arhgap23      | Cblc                                 | Plcl2     |
| Arhgap24      | Cbll1                                | Plek2     |
| Arhgap26      | Cbln1 /// LOC100046314               | Plekha2   |
| Arhgap27      | Cbln3                                | Plekha4   |
| Arhgap28      | Cbs                                  | Plekha5   |
| Arhgap29      | Cbx1                                 | Plekhh2   |
| Arhgap30      | Cbx2                                 | Plk2      |
| Arhgap31      | Cbx3                                 | Plod3     |
| Arhgap42      | Cbx3///Gm5792///Gm6901///Gm6917      | Plscr1    |
| Arhgap5       | Cbx5                                 | Plscr2    |
| Arhgef1       | Cbx6                                 | Plscr3    |
| Arhgef12      | Cby1                                 | Plxnc1    |
| Arhgef15      | Ccar2                                | Plxnd1    |
| Arhgef16      | Ccbe1                                | Pml       |
| Arhgef17      | Ccdc101                              | Pmp22     |
| Arhgef18      | Ccdc102a                             | Pmpcb     |
| Arhgef19      | Ccdc104                              | Pnlijprp1 |
| Arhgef2       | Ccdc106                              | Pnpla2    |
| Arhgef5       | Ccdc107                              | Pnpla7    |
| Arhgef7       | Ccdc109b                             | Pofut1    |
| Arid1a        | Ccdc114                              | Pold4     |
| Arid1b        | Ccdc117                              | Polg      |
| Arid3a        | Ccdc12                               | Polh      |
| Arid3b        | Ccdc120                              | Polr2a    |
| Arid3c        | Ccdc127                              | Polr3gl   |
| Arid4b        | Ccdc132                              | Polr3k    |
| Arid5a        | Ccdc136                              | Pop5      |
| Arid5b        | Ccdc138                              | Por       |
| Arip2         | Ccdc166                              | Pou2af1   |
| Arl1          | Ccdc167                              | Pou4f3    |
| Arl2bp        | Ccdc175                              | Ppap2b    |
| Arl3          | Ccdc25                               | Ppap2c    |
| Arl4d         | Ccdc28a                              | Ppapdc3   |
| Arl5c         | Ccdc34                               | Pparg     |
| Arl6ip2       | Ccdc34///LOC102632005                | Ppargc1a  |
| Arl6ip6       | Ccdc39                               | Ppm1g     |
| Arl8b         | Ccdc50                               | Ppox      |
| Armc1         | Ccdc53                               | Ppp1cc    |
| Armc10        | Ccdc58                               | Ppp1r14d  |
| Armc6         | Ccdc71l                              | Ppp1r1b   |
| Armc7         | Ccdc80                               | Ppp1r8    |
| Armet         | Ccdc85a                              | Ppp2cb    |
| Arnt          | Ccdc86                               | Ppp2r3c   |
| Arntl2        | Ccdc88a                              | Ppp2r5b   |
| Arpc4         | Ccdc91                               | Ppp2r5c   |
| Arpm1         | Ccdc93                               | Ppp4r2    |
| Arrdc3        | Ccdc97                               | Pprc1     |
| Arrdc5        | Ccer1                                | Prcp      |
| Ars2          | Cckar                                | Prdm1     |
| Arsg          | Cckbr                                | Prdx3     |
| Art2a-ps      | Ccl11                                | Prelid2   |
| Art2b         | Ccl12                                | Prep      |
| Art4          | Ccl19///Gm12407///Gm13309///Gm202    | Prg2      |
| Arts1         | Ccl21a///Ccl21b///Ccl21c///Gm10591// | Prickle1  |
| Arv1          | Ccl22                                | Prkca     |
| Asah2         | Ccl25                                | Prkce     |
| Asb13         | Ccl27a                               | Prkci     |
| Asb2          | Ccl27a///Ccl27b///Gm13306///Gm2506   | Prkd3     |
| Ascc1         | Ccl28                                | Prkg1     |
| Ascc2         | Ccl5                                 | Prmt2     |
| Ascl1         | Ccl6                                 | Prmt6     |
| Asf1a         | Ccl9                                 | Prok2     |
| Asf1b         | Ccm2                                 | Prom1     |
| Ash1l         | Ccna1                                | Pros1     |
| Aspa          | Ccnb1///Gm5593                       | Prpf19    |
| Aste1         | Ccnb3                                | Prpf38b   |
| Asxl1         | Ccnc                                 | Prpf4b    |
| Asxl2         | Ccnd2                                | Prph      |
| Atad2b        | Ccnd3                                | Prrg2     |
| Atad4         | Ccne1                                | Prtg      |
| Atad5         | Ccng1                                | Prune     |
| Atf2          | Ccng2                                | Prx       |
| Atf3          | Ccnh                                 | Psd3      |
| Atf5          | Ccni2                                | Psip1     |
| Atf7          | Ccnt1                                | Psma1     |
| Atg16l2       | Ccp1                                 | Psma5     |
| Atg2a         | Ccr1                                 | Psemb10   |
| Atg3          | Ccr10                                | Psemb7    |
| Atl2          | Ccr2                                 | Psmc5     |
| Atn1          | Ccr3                                 | Psmd11    |
| Atoh1         | Ccr5                                 | Psmd7     |
| Atox1         | Ccr9                                 | Psmf1     |
| Atp1a1        | Ccr11                                | Pspc1     |
| Atp1a2        | Ccr12                                | Pstpip2   |
| Atp1b1        | Ccs                                  | Ptch1     |
| Atp1b2        | Ccsap                                | Ptch2     |
| Atp2a1        | Ccser2                               | Ptdss2    |
| Atp2b1        | Cct3                                 | Pten      |
| Atp2b4        | Cct4                                 | Ptgs2     |
| Atp2c1        | Cct6b                                | Ptms      |
| Atp5a1        | Cct8                                 | Ptp4a2    |
| Atp5d         | Cd14                                 | Ptpn1     |
| Atp5g1        | Cd151                                | Ptpn12    |
| Atp5g2        | Cd160                                | Ptpn18    |
| Atp5h         | Cd163                                | Ptpn6     |
| Atp5k         | Cd164                                | Ptpn9     |
| Atp5l         | Cd177                                | Ptprb     |
| Atp6c2        | Cd180                                | Ptprcap   |
| Atp6v0e2      | Cd19                                 | Ptprj     |
| Atp6v1a       | Cd1d1                                | Ptprk     |
| Atp6v1b1      | Cd1d2                                | Ptrf      |
| Atp6v1b2      | Cd2                                  | Pttg1ip   |
| Atp6v1c2      | Cd200                                | Pura      |
| Atp6v1d       | Cd200r2 /// Cd200r4 /// LOC100044182 | Pvt1      |
| Atp6v1e1      | Cd200r3                              | Pxk       |
| Atp6v1g2      | Cd207                                | Pycr2     |
| Atp8a1        | Cd209a                               | Qpct      |
| Atp8b1        | Cd209b                               | Qpctl     |
| Atp8b2        | Cd209c                               | Qprt      |
| Atpbd1c       | Cd209e                               | Rab11b    |
| Atpif1        | Cd209f                               | Rab13     |
| Atr           | Cd209g                               | Rab28     |
| Atxn1         | Cd244///LOC677008                    | Rab2b     |
| Atxn2         | Cd247                                | Rab34     |
| Atxn7l2       | Cd248                                | Rab3d     |
| Atxn7l3       | Cd24a                                | Rab3il1   |
| Auh           | Cd274                                | Rab4a     |
| Aup1          | Cd276                                | Rab8b     |
| Aurkb         | Cd28                                 | Rabep1    |
| Auts2         | Cd2bp2                               | Rabgap1   |
| Aven          | Cd300a                               | Rabgap1l  |
| Avpi1         | Cd300ld                              | Rad23a    |
| Axin1         | Cd302                                | Rad51     |
| Axl           | Cd320                                | Rad51ap1  |
| Azi1          | Cd34                                 | Rad54l    |
| Azi2          | Cd36                                 | Raf1      |
| Azin1         | Cd37                                 | Rai1      |
| B130050l23Rik | Cd38                                 | Ralgps2   |
| B230118H07Rik | Cd3e                                 | Raly      |
| B230208H17Rik | Cd40                                 | Ramp2     |
| B230209C24Rik | Cd40lg                               | Ranbp17   |
| B230217C12Rik | Cd46                                 | Rapgef3   |
| B230217O12Rik | Cd47                                 | Rarg      |
| B230312A22Rik | Cd48                                 | Rasa1     |
| B230378P21Rik | Cd52                                 | Rasa3     |
| B230380D07Rik | Cd53                                 | Rasa4     |
| B230399E16Rik | Cd55                                 | Rasal2    |
| B3bp          | Cd55///Daf2                          | Rasd1     |
| B3gnt2        | Cd5l                                 | Rasgrf1   |
| B3gnt3        | Cd6                                  | Rassf1    |
| B3gnt6        | Cd70                                 | Rassf5    |
| B3gnt7        | Cd72                                 | Rbm14     |
| B4galnt2      | Cd74                                 | Rbm35a    |
| B4galnt3      | Cd79b                                | Rbm4b     |
| B4galt1       | Cd80                                 | Rbm6      |
| B4galt3       | Cd81                                 | Rbms2     |

|               |                                     |          |
|---------------|-------------------------------------|----------|
| B630019A10Rik | Cd83                                | Rbpj     |
| B930006L02Rik | Cd84                                | Rbpms    |
| B9d1          | Cd8a                                | Rc3h2    |
| B9d2          | Cd8b1                               | Rcan1    |
| BBS9          | Cd93                                | Rdh10    |
| BC003267      | Cd97                                | Reep3    |
| BC003324      | Cd99                                | Reln     |
| BC004728      | Cd99l2                              | Rerg     |
| BC005624      | Cdadcl1                             | Rev3l    |
| BC005803      | Cdc14b                              | Rfng     |
| BC006965      | Cdc23                               | Rftn2    |
| BC010787      | Cdc25c                              | Rfx3     |
| BC012717      | Cdc27                               | Rfxank   |
| BC013529      | Cdc2l6                              | Rgl1     |
| BC016423      | Cdc37                               | Rgref    |
| BC017612      | Cdc37l1                             | Rgs10    |
| BC017647      | Cdc42                               | Rgs16    |
| BC018242      | Cdc42bpa                            | Rgs7     |
| BC019699      | Cdc42ep4                            | Rhbdd2   |
| BC020182      | Cdc42ep5                            | Rhbdd3   |
| BC021395      | Cdc7                                | Rhbdl3   |
| BC021614      | Cdc73                               | Rhd      |
| BC021767      | Cdca3                               | Rhoc     |
| BC021919      | Cdca5                               | Rhou     |
| BC022651      | Cdca8                               | Rimklb   |
| BC023055      | Cdcp1                               | Rims2    |
| BC023105      | Cdh1                                | Ripply3  |
| BC024868      | Cdh10                               | Rit2     |
| BC025067      | Cdh11                               | Rlbp1    |
| BC025076      | Cdh12                               | Rnasel   |
| BC025190      | Cdh15                               | Rnd3     |
| BC025462      | Cdh17                               | Rnf10    |
| BC026434      | Cdh18                               | Rnf121   |
| BC027389      | Cdh2                                | Rnf144b  |
| BC027685      | Cdh2 /// LOC100044363               | Rnf157   |
| BC027814      | Cdh20                               | Rnf187   |
| BC028528      | Cdh22                               | Rnf19b   |
| BC028532      | Cdh23                               | Rnf20    |
| BC028660      | Cdh3                                | Rnf43    |
| BC029722      | Cdh4                                | Rnps1    |
| BC029726      | Cdh5                                | Robo1    |
| BC030307      | Cdh8                                | Rock1    |
| BC030336      | Cdh9                                | Rora     |
| BC030398      | Cdhr1                               | Rorb     |
| BC030440      | Cdhr5                               | Rpl12    |
| BC030867      | Cdipt                               | Rpl18    |
| BC030884      | Cdk12                               | Rpl37a   |
| BC031181      | Cdk14                               | Rpl41    |
| BC031353      | Cdk16                               | Rpl7     |
| BC031441      | Cdk18                               | Rpn1     |
| BC033915      | Cdk20                               | Rpn2     |
| BC033916      | Cdk2ap1                             | Rprd1b   |
| BC037393      | Cdk2ap2                             | Rps27    |
| BC038286      | Cdk5                                | Rps6ka5  |
| BC038520      | Cdk5r1                              | Rps6kl1  |
| BC038822      | Cdk5rap2                            | Rpsa     |
| BC040803      | Cdk5rap3                            | Rragd    |
| BC042782      | Cdk9                                | Rrp1b    |
| BC046404      | Cdkl2                               | Rrs1     |
| BC047062      | Cdkn1a                              | Rsad2    |
| BC048355      | Cdkn1c                              | Rsph1    |
| BC048556      | Cdkn2a                              | Rspo2    |
| BC048585      | Cdo1                                | Rsrc2    |
| BC048594      | Cdcpf1                              | Rtbdn    |
| BC048666      | Cdr2                                | Rtn2     |
| BC048672      | Cdr2l                               | Rtn3     |
| BC048761      | Cds2                                | Rtn4     |
| BC049760      | Cdx2                                | Rtp3     |
| BC050078      | Cdx4                                | Rufy1    |
| BC050122      | Ceacam1                             | Rufy3    |
| BC051212      | Ceacam1 /// Ceacam2                 | Rundc3a  |
| BC052040      | Ceacam10                            | Runx1    |
| BC053749      | Ceacam11                            | Runx1t1  |
| BC055463      | Ceacam12                            | Rusc1    |
| BC055823      | Ceacam2                             | Rusc2    |
| BC055918      | Ceacam9                             | Ryr2     |
| BC056189      | Cebpa                               | S100b    |
| BC057022      | Cebpb                               | S1pr3    |
| BC057593      | Cebpd                               | Sall1    |
| BC057627      | Cebpg                               | Sall2    |
| BC057893      | Cebpz                               | Samd14   |
| BC058096      | Cebpzoz                             | Samd4    |
| BC058417      | Cecr5                               | Sar1a    |
| BC058545      | Cel                                 | Sash1    |
| BC059892      | Cela1                               | Sat2     |
| BC060111      | Cela2a                              | Sbf2     |
| BC060267      | Cela3b                              | Scamp3   |
| BC060302      | Cela3b /// Gm13011 /// LOC102641402 | Scarb1   |
| BC060988      | Cela3b /// LOC102641402             | Scppdh   |
| BC061194      | Celf1                               | Scd1     |
| BC062185      | Celf2                               | Scd2     |
| BC062650      | Celsr3                              | Scd3     |
| BC062821      | Cemip                               | Scml4    |
| BC063749      | Cend1                               | Scn8a    |
| BC064451      | Cenpb                               | Scrn2    |
| BC065087      | Cenph                               | Scube3   |
| BC065777      | Cenpn                               | Sdccag8  |
| BC066135      | Cenpo                               | Sec1     |
| BC068281      | Centb1 /// LOC100045877             | Sec16b   |
| BC070417      | Centb1 /// Tnk1                     | Sec62    |
| BC070425      | Cep112                              | Sec63    |
| BC076616      | Cep131                              | Seh1     |
| BC080769      | Cep164                              | Sel1l3   |
| BC088983      | Cep170                              | Sema3a   |
| BC091771      | Cep250                              | Sema4a   |
| BC094334      | Cep350                              | Sema5a   |
| BC094408      | Cep41                               | Sema5b   |
| BC096391      | Cep55                               | Sema6a   |
| BC099561      | Cep57l1                             |          |
| BC099591      | Cep68                               | Sep-02   |
| BC100495      | Cep70                               | Sep-04   |
| BC107364      | Cep89                               | Sep-07   |
| BC112410      | Cer1                                | Sep-11   |
| BC115444      | Cercam                              | Sep-15   |
| BC126955      | Cerk                                | Sepw1    |
| BC127131      | Cers1 /// Gdf1                      | Serinc3  |
| BC128327      | Cers2                               | Serpib9  |
| BCAN          | Ces1c                               | Set      |
| BCAP31        | Ces1d                               | Setd7    |
| BCAT1         | Ces1e                               | Sez6     |
| BCKDHA        | Ces1g                               | Sf3a3    |
| BCL11A        | Ces2a                               | Sf3b2    |
| BCL2A1        | Ces2c /// Ces2d-ps                  | Sf3b5    |
| BCL6          | Ces2e                               | Sfmbt2   |
| BCL7A         | Ces3a /// Ces3b                     | Sfrp1    |
| BCL7B         | Ces4a                               | Sfxn1    |
| BIRC4         | Cetn1                               | Sgca     |
| BLNK          | Cetn2                               | Sgip1    |
| BLR1          | Cfb                                 | Sgk3     |
| BLVRA         | Cfd                                 | Sgol1    |
| BMS1          | Cfdp1                               | Sgpl1    |
| BNIP3L        | Cfh                                 | Sgpp1    |
| BRIP1         | Cfhr2                               | Sh2b3    |
| BTK           | Cfl1                                | Sh3bp5   |
| BTN3A2        | Cflar                               | Sh3kbp1  |
| BTN3A3        | Cfp                                 | Sh3pxd2a |
| BUD31         | Cftr                                | Shank2   |
| Bace          | Cga                                 | Shbg     |
| Bace1         | Cgnl1                               | Shc1     |
| Bach1         | Cgref1                              | Shc2     |
| Bach2         | Chad                                | Shc3     |
| Bag1          | Chchd3                              | Shd      |
| Bag3          | Chchd6                              | Shmt1    |
| Bahcc1        | Chchd7                              | Shoc2    |
| Bahd1         | Chd3os                              | Si       |
| Bai3          | Chd4                                | Siah2    |
| Baiap2        | Chk1                                | Sidt1    |
| Baiap2l2      | Chgb                                | Sirt4    |
| Bak1          | Chic1                               | Sit1     |
|               |                                     | Six1     |

|               |                          |          |
|---------------|--------------------------|----------|
| Bambi         | Chid1                    | Six3     |
| Barhl1        | Chil1                    | Six4     |
| Barhl2        | Chil3                    | Skil     |
| Barx1         | Chil3///Chil4            | Slbp     |
| Barx2         | Chka                     | Slc12a2  |
| Bat1a         | Chkb                     | Slc12a5  |
| Bat2          | Chkb///ChkbCpt1b///Cpt1b | Slc12a7  |
| Bat2d         | Chmp4c                   | Slc12a8  |
| Bax           | Chmp4c /// LOC100044854  | Slc13a3  |
| Baz1b         | Chn1                     | Slc16a3  |
| Baz2a         | Chn2                     | Slc16a8  |
| Baz2b         | Chodl                    | Slc18a1  |
| Bbc3          | Chpf                     | Slc1a4   |
| Bbx           | Chpf2                    | Slc22a17 |
| Bcam          | Chpt1                    | Slc23a2  |
| Bcan          | Chrd                     | Slc25a30 |
| Bcar1         | Chrdl1                   | Slc25a36 |
| Bcar3         | Chrdl2                   | Slc25a39 |
| Bcas1         | Chrm2                    | Slc26a8  |
| Bcas3         | Chrm3                    | Slc2a10  |
| Bcat1         | Chrm4                    | Slc2a2   |
| Bcat2         | Chrna1                   | Slc2a3   |
| Bckdhh        | Chrna2                   | Slc2a4   |
| Bcl11a        | Chrna3                   | Slc30a2  |
| Bcl11b        | Chrna4                   | Slc30a3  |
| Bcl2l1        | Chrna5                   | Slc30a9  |
| Bcl2l13       | Chrna6                   | Slc35a5  |
| Bcl2l14       | Chrna7                   | Slc35b1  |
| Bcl2l2        | Chrn3                    | Slc35e4  |
| Bcl3          | Chrn4                    | Slc37a1  |
| Bcl6          | Chrnd                    | Slc37a3  |
| Bcl6b         | Chrne                    | Slc39a7  |
| Bcl7a         | Chrng                    | Slc44a1  |
| Bcl7b         | Chst1                    | Slc4a1   |
| Bcl7c         | Chst10                   | Slc4a7   |
| Bcl9          | Chst11                   | Slc5a2   |
| Bcl9l         | Chst11 /// Phactr1       | Slc5a4b  |
| Bcs1l         | Chst11///Phactr1         | Slc6a1   |
| Bdkrb1        | Chst12                   | Slc6a6   |
| Bdkrb2        | Chst14                   | Slc6a9   |
| Bdnf          | Chst15                   | Slc7a5   |
| Bfar          | Chst2                    | Slc7a7   |
| Bhlhb2        | Chst3                    | Slc8a2   |
| Bhlhb3        | Chst4                    | Slc9a3r2 |
| Bin1          | Chst5                    | Slc9a8   |
| Bin3          | Chst7                    | Slco5a1  |
| Birc2         | Chst8                    | Slk      |
| Birc4         | Chsy3                    | Smad3    |
| Birc5         | Chtop                    | Smarcd3  |
| Birc6         | Chuk                     | Smg5     |
| Birc7         | Churc1                   | Snap23   |
| Bivm          | Cic                      | Snap29   |
| Bicap         | Cideb                    | Snapc2   |
| Blmh          | Cidec                    | Snapc5   |
| Blvra         | Cipc                     | Sncaip   |
| Bmf           | Cirbp                    | Sned1    |
| Bmi1          | Cisd1                    | Snrpb    |
| Bmp1          | Cish                     | Snrpd3   |
| Bmp3          | Cit                      | Sntb1    |
| Bmp4          | Cited2                   | Snx5     |
| Bmper         | Cited4                   | Soat1    |
| Bmpr2         | Ciz1                     | Socs1    |
| Bms1          | Ckap4                    | Socs3    |
| Bmyc          | Ckb                      | Sod1     |
| Bnc2          | Cklf                     | Son      |
| Bnip3         | Ckmt1                    | Sorbs1   |
| Bola2         | Ckmt2                    | Sorcs2   |
| Bpag1         | Clasp1                   | Sos1     |
| Bpil2         | Clca2                    | Sox13    |
| Bpnt1         | Clca3                    | Sox4     |
| Bptf          | Clcc1                    | Sp1      |
| Brap          | Clcf1                    | Sp110    |
| Brca1         | Clcn1                    | Sp4      |
| Brd2          | Clcn2                    | Sp6      |
| Brd4          | Clcn3                    | Sp7      |
| Brd8          | Clcn4-2                  | Spag5    |
| Brdt          | Clcn6                    | Spag7    |
| Brip1         | Clcnka                   | Sparc    |
| Brp44         | Clcnkb                   | Spata13  |
| Brpf1         | Cldn1                    | Spata5   |
| Brpf3         | Cldn10                   | Speg     |
| Brsk1         | Cldn11                   | Sphk1    |
| Brunol4       | Cldn14                   | Spin4    |
| Brwd1         | Cldn15                   | Spint1   |
| Bsg           | Cldn16                   | Spire2   |
| Btbd11        | Cldn18                   | Spred2   |
| Btbd2         | Cldn19                   | Spry2    |
| Btbd7         | Cldn2                    | Spsb1    |
| Btg1          | Cldn23                   | Sptlc1   |
| Btg4          | Cldn25                   | Sqle     |
| Btn1a1        | Cldn26                   | Sqstm1   |
| Btn5          | Cldn3                    | Srgap2   |
| Btn6          | Cldn4                    | Srgap3   |
| Btn7          | Cldn5                    | Srp68    |
| Btn9          | Cldn6                    | Srrm1    |
| Btrc          | Cldn9                    | Srsf3    |
| Bub3          | Clec10a                  | Ss18     |
| Bud13         | Clec12b                  | Ssbp3    |
| Bud31         | Clec14a                  | Ssbp4    |
| Butr1         | Clec1b                   | Ssrp1    |
| Bxdc1         | Clec2d                   | Sstr3    |
| Bxdc5         | Clec2h                   | St3gal1  |
| Bysl          | Clec3b                   | St3gal3  |
| Bzrap1        | Clec4a2                  | St3gal4  |
| C030014I23Rik | Clec4b1                  | St3gal5  |
| C030014K22Rik | Clec4d                   | St6gal1  |
| C030044B11Rik | Clec4e                   | Stac2    |
| C030046I01Rik | Clec4f                   | Stag1    |
| C10orf2       | Clec4g                   | Stam2    |
| C10orf26      | Clec5a                   | Stap1    |
| C10orf4       | Clec7a                   | Stard10  |
| C11orf67      | Clgn                     | Stat3    |
| C130022K22Rik | Clic5                    | Stat5a   |
| C130032J12Rik | Clip2                    | Stat5b   |
| C130034I18Rik | Clip4                    | Stau1    |
| C130039O16Rik | Clk4                     | Stc2     |
| C14orf181     | Clmn                     | Steap2   |
| C14orf43      | Clmp                     | Stip1    |
| C15orf57      | Clns1a                   | Stk11ip  |
| C16orf71      | Clock                    | Stk25    |
| C17orf63      | Clpb                     | Stk39    |
| C184          | Clps                     | Stk40    |
| C1QC          | Clstn1                   | Stra13   |
| C1galt1c1     | Clstn2                   | Stra6    |
| C1qa          | Clstn3                   | Strbp    |
| C1qb          | Clta                     | Strn     |
| C1qc          | Clu                      | Strn3    |
| C1ql4         | Clvs1                    | Stt3a    |
| C1qtnf6       | Cma1                     | Stx17    |
| C1s           | Cma2///Mcpt9             | Stx18    |
| C22orf32      | Cmah                     | Stx3     |
| C230071H18Rik | Cmb1                     | Stx6     |
| C230081A13Rik | Cmip                     | Stxbp1   |
| C230093N12Rik | Cmklr1                   | Stxbp3a  |
| C230094A16Rik | Cml1                     | Stxbp4   |
| C2CD2         | Cml2                     | Sufu     |
| C3            | Cml5                     | Sulf1    |
| C3orf25       | Cmpk1                    | Sulf2    |
| C430003P19Rik | Cmpk2                    | Sult1a1  |
| C5            | Cmtm1///Cmtm2a           | Sult1c2  |
| C630004H02Rik | Cmtm2a                   | Sumo3    |
| C630028N24Rik | Cmtm3                    | Suv420h1 |
| C630050I24Rik | Cmtm7                    | Suz12    |
| C6orf108      | Cmtm8                    | Syk      |
| C6orf222      | Cmtr1                    | Syng3    |
| C6orf32       | Cnbd2                    | Synj2bp  |
| C730027E14Rik | Cnep1r1                  | Sypl2    |
| C78409        | Cngb1                    | Syt12    |
| C7orf55       | Cngb3                    | Syt3     |

|               |                          |          |
|---------------|--------------------------|----------|
| C7orf59       | Cnih1                    | Syt6     |
| C87198        | Cnih3                    | Syt7     |
| C87436        | Cnn2                     | Tac4     |
| C87499        | Cnn3                     | Tacc3    |
| C920016K16Rik | Cnm1                     | Taf7     |
| CALM2         | Cnm2                     | Tal1     |
| CAMK1         | Cnm3                     | Tanc1    |
| CAT56         | Cnot2                    | Tap1     |
| CAT60         | Cnot4                    | Tapbp    |
| CCDC127       | Cnot6l                   | Tapbp1   |
| CCDC19        | Cnp                      | Tardbp   |
| CCDC28B       | Cnp2                     | Tax1bp3  |
| CCL2          | Cnp3                     | Tbc1d1   |
| CCL3          | Cnr2                     | Tbkbp1   |
| CCL4          | Cntd1                    | Tbl3     |
| CCL4L1#CCL4L2 | Cntf///Zfp91///Zfp91Cntf | Tbp      |
| CCL5          | Cntfr                    | Tbrg4    |
| CCNB1IP1      | Cntln                    | Tbx15    |
| CD180         | Cntn1                    | Tbx18    |
| CD19          | Cntn2                    | Tbx2     |
| CD22          | Cntn3                    | Tbx20    |
| CD24          | Cntn4                    | Tbx21    |
| CD27          | Cntn6                    | Tbx3     |
| CD37          | Cntnap1                  | Tbxas1   |
| CD44          | Cntnap2                  | Tc2n     |
| CD52          | Cntnap4                  | Tceal8   |
| CD53          | Cntrl                    | Tceb1    |
| CD68          | Coa3                     | Tcf15    |
| CD69          | Coa5                     | Tcf20    |
| CD74          | Coa7                     | Tcf3     |
| CD79A         | Cobl                     | Tcf4     |
| CD83          | Cobl1                    | Tcf7l2   |
| CD86          | Coch                     | Tcfap2c  |
| CD97          | Cog1                     | Tcfap2e  |
| CDC123        | Cog1///LOC102641618      | Tcp11    |
| CDC20         | Cog4                     | Tcte2    |
| CDC37         | Coil                     | Tdrd7    |
| CDK2          | Col11a1                  | Tead1    |
| CDK2AP2       | Col11a2                  | Tead4    |
| CDKN2C        | Col12a1                  | Tesk1    |
| CENPH         | Col13a1                  | Tesk2    |
| CHKA          | Col14a1                  | Tet1     |
| CHM           | Col15a1                  | Tex14    |
| CIITA         | Col16a1                  | Tfrc     |
| CKLF6         | Col17a1                  | Tgfb1    |
| CKS1B         | Col19a1                  | Tgfb1i1  |
| CKS2          | Col1a1                   | Tgfb2    |
| CLCN3         | Col1a2                   | Tgfb3    |
| CLEC4A        | Col22a1                  | Tgibr3   |
| CLIP4         | Col23a1                  | Tgm2     |
| CLPP          | Col25a1                  | Thap2    |
| CMTM3         | Col26a1                  | Thbs3    |
| COPS6         | Col2a1                   | Thra     |
| CORO1A        | Col3a1                   | Thtpa    |
| CR2           | Col4a1                   | Thumpd3  |
| CRLM3         | Col4a2                   | Thy1     |
| CS444436      | Col4a3                   | Tia1     |
| CS444466      | Col4a4                   | Tial1    |
| CSF1          | Col5a1                   | Tiam1    |
| CSK           | Col5a2                   | Timp2    |
| CTSB          | Col5a3                   | Tinagl1  |
| CTSS          | Col6a1                   | Tk2      |
| CUEDC1        | Col6a2                   | Tlcd1    |
| CWF19L1       | Col6a3                   | Tlk2     |
| CXCL10        | Col7a1                   | Tln1     |
| CXXC1///SPP1  | Col8a2                   | Tlr3     |
| CXorf42       | Col9a1                   | Tm4sf5   |
| CYB5B         | Col9a2                   | Tm7sf3   |
| CYFIP2        | Col9a3                   | Tm9sf3   |
| CYP1A1        | Colec12                  | Tmc2     |
| Cab39         | Colq                     | Tmcc3    |
| Cab39l        | Comm5                    | Tmed4    |
| Cabin1        | Comm7                    | Tmed5    |
| Cabp4         | Comp                     | Tmed8    |
| Cachd1        | Comt                     | Tmeff2   |
| Cacna1a       | Comtd1                   | Tmem106a |
| Cacna1c       | Copb2                    | Tmem109  |
| Cacna1g       | Copg1                    | Tmem120b |
| Cacna1h       | Copg2os2                 | Tmem129  |
| Cacna1s       | Coprs                    | Tmem132a |
| Cacnb1        | Cops5                    | Tmem141  |
| Cacnb2        | Cops6                    | Tmem161a |
| Cacnb3        | Copz1                    | Tmem16j  |
| Cacng3        | Copz2                    | Tmem30b  |
| Cacng4        | Coq10a                   | Tmem33   |
| Cadm1         | Coq3                     | Tmem55a  |
| Cadm3         | Coq5                     | Tmem82   |
| Cadps2        | Corin                    | Tmem98   |
| Calb1         | Coro1a                   | Tmod3    |
| Calb2         | Coro1c                   | Tmpo     |
| Calm1         | Coro2b                   | Tmprss5  |
| Calm2         | Coro6                    | Tmtc1    |
| Calm3         | Cotl1                    | Tmtc2    |
| Caln1         | Cox15                    | Tnfaip2  |
| Calr          | Cox16                    | Tnfaip8  |
| Calu          | Cox17                    | Tnfrsf19 |
| Camk1         | Cox20                    | Tnfsf13b |
| Camk1d        | Cox5b                    | Tnfsf9   |
| Camk2a        | Cox6b2                   | Tnks2    |
| Camk2d        | Cox7c                    | Tnrc6a   |
| Camk2n1       | Cox8a                    | Tnrc6b   |
| Camk2n2       | Cox8b                    | Tom1l2   |
| Camta2        | Cp                       | Tomm40   |
| Cand1         | Cpa2                     | Top2b    |
| Canx          | Cpa3                     | Top3a    |
| Capn3         | Cpa5                     | Top3b    |
| Caprin1       | Cpb2                     | Tox      |
| Caprin2       | Cpd                      | Tpd52    |
| Capza2        | Cpe /// LOC100046434     | Tpi1     |
| Car11         | Cpeb1                    | Tpm1     |
| Car14         | Cpeb3                    | Tpm2     |
| Car3          | Cpeb4                    | Tpm3     |
| Car5a         | Cphx1///Cphx2///Cphx3    | Tpp2     |
| Car7          | Cphx3                    | Tpst2    |
| Car9          | Cplx4                    | Tpte     |
| Card10        | Cpn1                     | Traf4    |
| Card14        | Cpn2                     | Traf6    |
| Card6         | Cpne2                    | Trak1    |
| Cars          | Cpne4                    | Trappc3  |
| Casc1         | Cpq                      | Trappc4  |
| Caskin1       | Cps1                     | Trem3    |
| Caskin2       | Cpsf3                    | Trh      |
| Casp7         | Cpsf4l                   | Trhr2    |
| Casp8ap2      | Cpxm1                    | Trib3    |
| Casz1         | Cpz                      | Trim2    |
| Catsper2      | Cr1l                     | Trim26   |
| Cbara1        | Cr2                      | Trim31   |
| Cbfa2t1h      | Crabp1                   | Trim34a  |
| Cbfa2t3h      | Crabp2                   | Trim44   |
| Cbfb          | Crat                     | Trim7    |
| Cblb          | Crb1                     | Trim8    |
| Cblc          | Creb1                    | Trio     |
| Cbl1          | Creb3                    | Trip4    |
| Cbr1          | Creb3l1                  | Trp53    |
| Cbr2          | Creb3l2                  | Trp53bp1 |
| Cbx1          | Creb3l3                  | Trpc7    |
| Cbx3          | Creb5                    | Trpm7    |
| Cbx5          | Crebrf                   | Tsc22d1  |
| Cbx6          | Crebzf                   | Tshz2    |
| Cbx7          | Creld1                   | Tspan12  |
| Cbx8          | Creld2                   | Tspan13  |
| Ccar1         | Crem                     | Tspan31  |
| Ccdc103       | Crhr1                    | Tspan33  |
| Ccdc106       | Crhr2                    | Tssk3    |
| Ccdc109a      | Crim2                    | Tst      |
| Ccdc12        | Cript                    | Ttbk2    |
| Ccdc131       | Crisp1                   | Ttc1     |
| Ccdc139       | Crisp2                   | Ttc3     |
| Ccdc142       | Crisp3                   | Ttc39b   |

|            |                                   |         |
|------------|-----------------------------------|---------|
| Ccdc16     | Crispld1                          | Ttf1    |
| Ccdc18     | Crk                               | Ttk     |
| Ccdc28b    | Crkl                              | Ttll3   |
| Ccdc33     | Crif2                             | Ttyh2   |
| Ccdc42     | Crmp1                             | Tuba4a  |
| Ccdc45     | Crp                               | Tuba8   |
| Ccdc5      | Crtac1                            | Tubb3   |
| Ccdc51     | Crtap                             | Tufm    |
| Ccdc52     | Crtc2                             | Tulp2   |
| Ccdc53     | Crtc3                             | Tulp3   |
| Ccdc57     | Crx                               | Tusc2   |
| Ccdc6      | Crxos                             | Tusc3   |
| Ccdc60     | Crxos1                            | Tut1    |
| Ccdc7      | Cry1                              | Txnip   |
| Ccdc72     | Cryab                             | Txnl1   |
| Ccdc76     | Cryba1                            | Txnrd1  |
| Ccdc77     | Cryba2                            | U2af114 |
| Ccdc85c    | Cryba4                            | Ubap2l  |
| Ccdc88a    | Crybb1                            | Ubc     |
| Ccdc88b    | Crybb2                            | Ube2d3  |
| Ccdc9      | Crybb3                            | Ube2e2  |
| Ccdc90a    | Crybg3                            | Ube2g2  |
| Ccdc91     | Cryga                             | Ube2l6  |
| Ccdc92     | Crygb                             | Ube2v1  |
| Ccdc94     | Crygb///Crygc                     | Ube4b   |
| Ccdc97     | Crygd                             | Ubn1    |
| Ccdc98     | Crygn                             | Ubqln2  |
| Cchcr1     | Crygs                             | Ubttd1  |
| Ccl22      | Cryl1                             | Ucp2    |
| Ccl25      | Crym                              | Ugt2b38 |
| Ccnd1      | Cryz11                            | Unc13a  |
| Ccnd2      | Csad                              | Unc5c   |
| Ccnd3      | Csdc2                             | Unc93b1 |
| Ccne2      | Csf1                              | Unk     |
| Ccni       | Csf2                              | Upp1    |
| Ccnjl      | Csf2ra                            | Urm1    |
| Ccnk       | Csf2rb///Csf2rb2                  | Usf1    |
| Ccnt1      | Csf2rb2                           | Usp12   |
| Ccnt2      | Csf3                              | Usp13   |
| Ccr10      | Csf3r                             | Usp39   |
| Ccr9       | Csgalnact1                        | Usp48   |
| Ccrl2      | Csgalnact2                        | Utrn    |
| Cct3       | Csk                               | Vamp2   |
| Cct6b      | Csn1s1                            | Vamp5   |
| Cd101      | Csn1s2a                           | Vangl2  |
| Cd109      | Csn1s2b                           | Vapa    |
| Cd14       | Csn2                              | Vars    |
| Cd24a      | Csn3                              | Vasn    |
| Cd27       | Csnk1a1                           | Vav3    |
| Cd274      | Csnk1d                            | Vax2    |
| Cd2ap      | Csnk1e                            | Vcan    |
| Cd2bp2     | Csnk1g2                           | Vcp     |
| Cd37       | Csnk2a1                           | Vegfa   |
| Cd4        | Csnk2a2                           | Vegfc   |
| Cd44       | Csnk2b                            | Vgll4   |
| Cd47       | Cspg4                             | Vil1    |
| Cd68       | Cspp1                             | Vpreb1  |
| Cd7        | Csprs///Gm15433///Gm2666///Gm7605 | Vps11   |
| Cd79a      | Csprs///Gm15433///Gm2666///Gm7605 | Vps13c  |
| Cd80       | Csrnp3                            | Vps18   |
| Cd82       | Csrp3                             | Vps25   |
| Cd86       | Cst10                             | Vps35   |
| Cd9        | Cst12                             | Vps72   |
| Cdadc1     | Cst7                              | Vsig2   |
| Cdc123     | Cst8                              | Vstm2b  |
| Cdc14a     | Csta                              | Vwa1    |
| Cdc25a     | Cstf1                             | Vwa5a   |
| Cdc26      | Ctbp2                             | Wdr33   |
| Cdc27      | Ctbs                              | Wdr75   |
| Cdc2l5     | Ctc1                              | Wfdc2   |
| Cdc37      | Ctcf                              | Wnk1    |
| Cdc42      | Ctdspl                            | Wnk4    |
| Cdc42bpb   | Ctla4                             | Wnt10a  |
| Cdc42ep4   | Ctnna1                            | Wnt2b   |
| Cdc42se1   | Ctnna2                            | Wnt5a   |
| Cdc7       | Ctnnb1                            | Wnt5b   |
| Cdc73      | Ctnnd2 /// LOC100045979           | Wnt6    |
| Cdca3      | Ctps2                             | Wnt7a   |
| Cdca5      | Ctr9                              | Wnt8b   |
| Cdca7      | Ctrc                              | Wnt9a   |
| Cdca7l     | Ctrl                              | Wnt9b   |
| Cdh10      | Cts3                              | Wt1     |
| Cdh18      | Cts6                              | Xiap    |
| Cdh22      | Cts8                              | Xkr6    |
| Cdh24      | Ctsb                              | Ybx1    |
| Cdh5       | Ctse                              | Ybx2    |
| Cdh6       | Ctsf                              | Yes1    |
| Cdh8       | Ctsg                              | Yme1l1  |
| Cdk2       | Ctsh                              | Ythdf1  |
| Cdk3       | Ctsj                              | Ywhaz   |
| Cdk5rap1   | Ctsk                              | Zap70   |
| Cdk5rap3   | Ctsl                              | Zbtb16  |
| Cdk6       | Ctsm                              | Zc3h12a |
| Cdkal1     | Ctso                              | Zc3hc1  |
| Cdkl2      | Ctsq                              | Zcchc3  |
| Cdkl3      | Ctsr                              | Zfhx3   |
| Cdkn1a     | Ctsz                              | Zfhx4   |
| Cdkn1b     | Cttn                              | Zfp142  |
| Cdkn2a     | Cubn                              | Zfp143  |
| Cdkn2aip   | Cuedc1                            | Zfp148  |
| Cdkn2aipnl | Cuedc2                            | Zfp160  |
| Cdon       | Cul2                              | Zfp191  |
| Cdr2l      | Cul7                              | Zfp202  |
| Cdrt4      | Cul9                              | Zfp239  |
| Cdv1R      | Cuta                              | Zfp260  |
| Cdx2       | Cux1                              | Zfp277  |
| Cdyl       | Cux2                              | Zfp318  |
| Ceacam16   | Cwc15                             | Zfp346  |
| Cebpe      | Cwh43                             | Zfp36   |
| Cecr5      | Cx3cl1                            | Zfp36l1 |
| Cecr6      | Cx3cr1                            | Zfp395  |
| Cela1      | Cxadr                             | Zfp444  |
| Celsr1     | Cxcl1                             | Zfp462  |
| Cenp-a     | Cxcl12                            | Zfp472  |
| Cenpa      | Cxcl13                            | Zfp503  |
| Cenpc1     | Cxcl14                            | Zfp521  |
| Cenpl      | Cxcl16                            | Zfp553  |
| Cenpp      | Cxcl17                            | Zfp60   |
| Centa1     | Cxcl2                             | Zfp689  |
| Centa2     | Cxcl5                             | Zfp768  |
| Centb1     | Cxcr2                             | Zfp771  |
| Centb2     | Cxcr4                             | Zfp787  |
| Centg1     | Cxcr5                             | Zfp82   |
| Centg2     | Cxx1a///Cxx1b                     | Zfp87   |
| Cep164     | Cxx1c                             | Zfp93   |
| Cep170     | Cxxc1                             | Zfp943  |
| Cep55      | Cxxc5                             | Zfpm1   |
| Cep57      | Cyb5b                             | Zfr     |
| Cep57l1    | Cyb5r1                            | Zfyve16 |
| Cep63      | Cyb5r3                            | Zic1    |
| Cep70      | Cyb5rl                            | Zic2    |
| Cerk       | Cyba                              | Zic4    |
| Cetn3      | Cybb                              | Zic5    |
| Cfhr1      | Cyct                              | Zmat5   |
| Cfl1       | Cygb                              | Zmi2    |
| Cggbp1     | Cyhr1                             | Zmynd10 |
| ChaK       | Cyp11a1                           | Zmynd11 |
| Chchd3     | Cyp11b2                           | Znhit1  |
| Chchd4     | Cyp1a2                            | Znrf1   |
| Chchd8     | Cyp1b1                            | Zscan12 |
| Chd1       | Cyp21a1                           | Zwint   |
| Chd1l      | Cyp26a1                           | Zyg11a  |
| Chd2       | Cyp2a12                           |         |
| Chd3       | Cyp2a4///Cyp2a5                   |         |
| Chd4       | Cyp2c37                           |         |
| Chd7       | Cyp2c38                           |         |
| Chd8       | Cyp2c50                           |         |
| Chd9       | Cyp2c54                           |         |
| Chgb       | Cyp2c65                           |         |

|         |                                              |
|---------|----------------------------------------------|
| Chid1   | Cyp2c68                                      |
| Chit1   | Cyp2d10                                      |
| Chka    | Cyp2d13                                      |
| Chl1    | Cyp2d22                                      |
| Chmp5   | Cyp2d9                                       |
| Chn2    | Cyp2e1                                       |
| Chrd    | Cyp2f2                                       |
| Chrna1  | Cyp2g1                                       |
| Chrn1   | Cyp2j13                                      |
| Chrn4   | Cyp2j5                                       |
| Chrp    | Cyp3a11                                      |
| Cib1    | Cyp3a16                                      |
| Cic     | Cyp3a25                                      |
| Cidec   | Cyp3a44                                      |
| Ciita   | Cyp4a1                                       |
| Cirbp   | Cyp4f15                                      |
| Cisd2   | Cyp4f16                                      |
| Cish    | Cyp4f16///Cyp4f37                            |
| Ckap5   | Cyp4v3                                       |
| Cklf    | Cyp51                                        |
| Cks1b   | Cyp7b1                                       |
| Cks2    | Cyp8b1                                       |
| Clasp1  | Cypt1///Cypt7///Cypt8                        |
| Clasp2  | Cyr61                                        |
| Clast2  | Cys1                                         |
| Clca5   | Cysltr1                                      |
| Clcf1   | Cysltr2                                      |
| Clcn1   | Cyth1                                        |
| Clcn2   | Cyth3                                        |
| Clcn3   | Cyyr1                                        |
| Clcn4-2 | D030011010Rik                                |
| Clcnka  | D030029J20Rik                                |
| Clcnkb  | D030056L22Rik                                |
| Cldn15  | D11Ert326e                                   |
| Cldn23  | D12Ert123e                                   |
| Cldn7   | D12Ert216e                                   |
| Cldnd1  | D13Ert205e                                   |
| Cldnd2  | D13Ert608e///LOC102631530                    |
| Clec2h  | D15Ert30e                                    |
| Clic1   | D15Ert55e                                    |
| Clic4   | D17892                                       |
| Clim1   | D17Wsu104e                                   |
| Clk2    | D17Wsu92e                                    |
| Climn   | D18Ert232e                                   |
| Cln6    | D1Ert259e                                    |
| Clp1    | D1Ert622e                                    |
| Clptm1  | D1Ert75e                                     |
| Clspn   | D1Pas1                                       |
| Clstn1  | D2Ert127e                                    |
| Clstn3  | D2Ert63e                                     |
| Cltc    | D2Ert93e                                     |
| Cmtm4   | D2hgdh                                       |
| Cmtm5   | D3Bwg0562e                                   |
| Cmtm7   | D3Ert246e                                    |
| Cmtm8   | D3Ert258e                                    |
| Cnbp2   | D3Wsu167e                                    |
| Cnih    | D430019H16Rik                                |
| Cnih3   | D4Ert117e                                    |
| Cnih4   | D4Ert58e                                     |
| Cnn2    | D530037H12Rik                                |
| Cnnm2   | D5Ert102e                                    |
| Cno     | D730048I06Rik                                |
| Cnot10  | D7Bwg0826e                                   |
| Cnot2   | D7Ert143e///Mir295                           |
| Cnot4   | D7Ert183e                                    |
| Cnot6   | D7Ert187e                                    |
| Cnot6l  | D7Ert715e                                    |
| Cnot8   | D830044I16Rik                                |
| Cnp     | D8Ert107e                                    |
| Cnpy1   | D8Ert67e                                     |
| Cntfr   | D8Ert738e                                    |
| Cntn4   | D8Wsu26e                                     |
| Cntnap1 | D930015E06Rik                                |
| Coasy   | D930048N14Rik                                |
| Cog7    | D9Ert26e                                     |
| Cog8    | D9Ert306e                                    |
| Col11a2 | D9Ert356e                                    |
| Col13a1 | DDX26B                                       |
| Col16a1 | DIO2                                         |
| Col17a1 | DXBay18///Gm14685///Gm5639///Gm5640///Gm5936 |
| Col18a1 | DXErt223e                                    |
| Col19a1 | DXErt242e                                    |
| Col1a1  | Daam2                                        |
| Col28a1 | Dab1                                         |
| Col2a1  | Dab2                                         |
| Col4a5  | Dab2ip                                       |
| Col4a6  | Dach1                                        |
| Col5a2  | Dach2                                        |
| Colec11 | Dact1                                        |
| Commd5  | Dad1                                         |
| Commd6  | Daf2                                         |
| Commd7  | Dagla                                        |
| Comp    | Dak                                          |
| Comtd1  | Dand5                                        |
| Cops4   | Dao                                          |
| Cops5   | Dapk1                                        |
| Cops6   | Dapk3                                        |
| Cops7b  | Dapp1                                        |
| Coq3    | Dazap1                                       |
| Coq5    | Dazl                                         |
| Coq6    | Dbf4                                         |
| Coro1b  | Dbh                                          |
| Coro7   | Dbn1                                         |
| Cot11   | Dbn1dd1                                      |
| Cox11   | Dbp                                          |
| Cox17   | Dcaf12l1                                     |
| Cox18   | Dcakd                                        |
| Cox4i2  | Dcbld2                                       |
| Cox7a2  | Dcc                                          |
| Cox7a2l | Dchs1                                        |
| Cox8a   | Dck                                          |
| Cp      | Dclk1                                        |
| Cpeb3   | Dcn                                          |
| Cpeb4   | Dcp1a                                        |
| Cpm     | Dcpp1///Dcpp2///Dcpp3                        |
| Cpne2   | Dcpp3                                        |
| Cpne4   | Dcps                                         |
| Cpne8   | Dct                                          |
| Cpne9   | Dctn4                                        |
| Cpped1  | Dctn6                                        |
| Cpsf3l  | Dcun1d1                                      |
| Cpsf6   | Dcun1d4                                      |
| Cpt1a   | Dcun1d5                                      |
| Cpvl    | Dcx                                          |
| Crabp2  | Dda1                                         |
| Crb2    | Ddah1                                        |
| Crbn    | Ddah2                                        |
| Creb1   | Ddc                                          |
| Creb3   | Ddhd1                                        |
| Creb3l4 | Ddit3                                        |
| Creb5   | Ddit4l                                       |
| Crebbp  | Ddo                                          |
| Crebl2  | Ddost                                        |
| Crhr1   | Ddr1                                         |
| Crip1   | Ddr2                                         |
| Crkrs   | Ddrgk1                                       |
| Crif1   | Ddt                                          |
| Crif3   | Ddx10                                        |
| Crmp5   | Ddx17                                        |
| Crry    | Ddx18                                        |
| Crtc2   | Ddx19b                                       |
| Cryab   | Ddx20                                        |
| Cryz1   | Ddx25                                        |
| Csda    | Ddx26b                                       |
| Csde1   | Ddx39                                        |
| Cse1l   | Ddx39b                                       |
| Csf1    | Ddx3x                                        |
| Csmd3   | Ddx3y                                        |
| Csnk1a1 | Ddx4                                         |

|               |                                  |
|---------------|----------------------------------|
| Csnk1g3       | Ddx41                            |
| Cspg2         | Ddx46                            |
| Cspp1         | Ddx47                            |
| Csrp1         | Ddx49                            |
| Csrp3         | Ddx6                             |
| Cst3          | Ddx60                            |
| CtBP1         | Decr1                            |
| Ctage5        | Defa-rs1                         |
| Ctbp1         | Defa-rs2                         |
| Ctbp2         | Defa-rs7                         |
| Ctcf          | Defa1///Defa24///Defa6///Gm15284 |
| Ctdsp1        | Defa15                           |
| Ctdspl2       | Defa3                            |
| Ctf1          | Defa4                            |
| Ctnna1        | Defa5///Gm10104///Gm15315        |
| Ctnna2        | Defb10                           |
| Ctnna3        | Defb11                           |
| Ctnnd1        | Defb13                           |
| Ctrl          | Defb15                           |
| Ctsb          | Defb2                            |
| Ctss          | Defb3                            |
| Cuedc1        | Defb35                           |
| Cuedc2        | Defb4                            |
| Cul1          | Defb5                            |
| Cul2          | Defb7                            |
| Cul4b         | Defb8                            |
| Cuta          | Defb9                            |
| Cutl1         | Dennd4b                          |
| Cutl2         | Dennd5a                          |
| Cux/CDP(1B1)  | Depdc2                           |
| Cuzd1         | Deptor                           |
| Cwf19l1       | Derl1                            |
| Cwf19l2       | Derl3                            |
| Cxcl1         | Des                              |
| Cxcl12        | Desi2                            |
| Cyb5          | Dfna5                            |
| Cyb561d1      | Dgat1                            |
| Cyb561d2      | Dgcr14                           |
| Cyb5d1        | Dgcr2                            |
| Cybas3        | Dgka                             |
| Cyc1          | Dgke                             |
| Cygb          | Dgkh                             |
| Cyhr1         | Dguok                            |
| Cyld          | Dhcr24                           |
| Cyp24a1       | Dhdds                            |
| Cyp26b1       | Dhh                              |
| Cyp27b1       | Dhps                             |
| Cyp2c67       | Dhrs11                           |
| Cyp2c69       | Dhrs4                            |
| Cyp2d26       | Dhrs7                            |
| Cyp2j13       | Dhrs7b                           |
| Cyp2s1        | Dhx30                            |
| Cyp4f13       | Dhx32                            |
| Cyp4f16       | Dhx36                            |
| Cyp4f40       | Dhx38                            |
| Cyp4v3        | Dhx58                            |
| Cyp7b1        | Diablo                           |
| Cypt12        | Diap2                            |
| Cyr61         | Dimt1                            |
| Cytl1         | Dio1                             |
| Cytor4        | Dio2                             |
| D030011O10Rik | Diras1                           |
| D030051N19Rik | Dixdc1                           |
| D0H4S114      | Dkk1                             |
| D10Ert610e    | Dkk2                             |
| D10Ert641e    | Dkk4                             |
| D11Bwg0434e   | Dlat                             |
| D11Bwg0517e   | Dlc1                             |
| D11Wsu47e     | Dleu2                            |
| D11Wsu99e     | Dlg2                             |
| D11lgp2       | Dlg3                             |
| D12Ert551e    | Dlg4                             |
| D130043K22Rik | Dlgap4                           |
| D130058E05Rik | Dlk1                             |
| D130059P03Rik | Dll3                             |
| D14Ert500e    | Dlst                             |
| D15Wsu75e     | Dlx1                             |
| D17H6S56E-3   | Dlx1as                           |
| D17H6S56E-5   | Dlx2                             |
| D17Wsu92e     | Dlx3                             |
| D19Ert652e    | Dlx4                             |
| D230004N17Rik | Dlx6                             |
| D2Ert391e     | Dmc1                             |
| D2Ert750e     | Dmgdh                            |
| D330012F22Rik | Dmkn                             |
| D330022A01Rik | Dmp1                             |
| D330037H05Rik | Dmpk                             |
| D3Ucla1       | Dmrt1                            |
| D430033N04Rik | Dmrt2                            |
| D4Bwg0951e    | Dmrtb1                           |
| D4Ert196e     | Dmtf1                            |
| D4Ert22e      | Dmtn                             |
| D4Ert429e     | Dmxl2                            |
| D4Wsu132e     | Dnaaf1                           |
| D4Wsu53e      | Dnah1                            |
| D530033C11Rik | Dnah5                            |
| D5Wsu178e     | Dnah8                            |
| D630013G24Rik | Dnahc2                           |
| D630037F22Rik | Dnaja1                           |
| D630040G17Rik | Dnaja2                           |
| D6Mm5e        | Dnaja3                           |
| D6Wsu116e     | Dnajib11                         |
| D6Wsu163e     | Dnajib3                          |
| D930036F22Rik | Dnajib5                          |
| D930048N14Rik | Dnajib7                          |
| D9Mgc48e      | Dnajib9                          |
| DAXX          | Dnajc1                           |
| DCC           | Dnajc10                          |
| DDIT3         | Dnajc12                          |
| DDR1          | Dnajc15                          |
| DEDD          | Dnajc17                          |
| DEK           | Dnajc18                          |
| DHFR          | Dnajc19///Dnajc19-ps             |
| DHX35         | Dnajc2                           |
| DIF-3         | Dnajc21                          |
| DLEU2         | Dnajc24                          |
| DLL3          | Dnajc27                          |
| DLX4          | Dnajc3                           |
| DNMT1         | Dnajc30                          |
| DPCR1         | Dnajc7                           |
| DQ542042      | Dnali1                           |
| DQ549198      | Dnase1                           |
| DQ551845      | Dnase1l2                         |
| DQ553546      | Dnase1l3                         |
| DQ555568      | Dnase2a                          |
| DQ558020      | Dnase2b                          |
| DQ564514      | Dnd1                             |
| DQ568730      | Dner                             |
| DQ568996      | Dnm1                             |
| DQ686689      | Dnm1l                            |
| DQ686988      | Dnm2                             |
| DQ687171      | Dnm3                             |
| DQ689104      | Dnm3os///Mir214                  |
| DQ689702      | Dnmt3a                           |
| DQ693555      | Dnmt3b                           |
| DQ694834      | Dnmt3l                           |
| DQ697726      | Dntt                             |
| DQ699684      | Doc2a                            |
| DQ701953      | Doc2b                            |
| DQ702757      | Dock10                           |
| DQ703064      | Dock2                            |
| DQ703302      | Dock5                            |
| DQ704526      | Dock6                            |
| DQ704729      | Dock7                            |
| DQ707380      | Dock8                            |
| DQ711509      | Dok1                             |
| DQ711560      | Dok5                             |
| DQ712497      | Dok6                             |
| DQ716012      | Donson                           |



|                         |                                                                                         |
|-------------------------|-----------------------------------------------------------------------------------------|
| DQ716032                | Dpep1                                                                                   |
| DQ716740                | Dpf1                                                                                    |
| DQ720410                | Dpf3                                                                                    |
| DQ722851                | Dph7                                                                                    |
| DQ726464                | Dpp3                                                                                    |
| DREAM/calsenilin/KChIP3 | Dpp4                                                                                    |
| DUSP10                  | Dpp6                                                                                    |
| DUSP12///DUSP1          | Dppa2                                                                                   |
| DUT                     | Dppa4                                                                                   |
| DYNC1I2                 | Dpt                                                                                     |
| Dab1                    | Dpyd                                                                                    |
| Dab2                    | Dpys                                                                                    |
| Dag1                    | Dpysl2                                                                                  |
| Dagla                   | Dpysl3                                                                                  |
| Dalrd3                  | Dpysl4                                                                                  |
| Dand5                   | Dqx1                                                                                    |
| Dap3                    | Dram1                                                                                   |
| Dapk2                   | Dram2                                                                                   |
| Dars2                   | Drap1                                                                                   |
| Daxx                    | Draxin                                                                                  |
| Dbi                     | Drd2                                                                                    |
| Dbil5                   | Drd3                                                                                    |
| Dbndd1                  | Drd4                                                                                    |
| Dbp                     | Drg1                                                                                    |
| Dbt                     | Drg2                                                                                    |
| Dbx1                    | Dsc1                                                                                    |
| Dcaf8                   | Dsc2                                                                                    |
| Dcakd                   | Dsc3                                                                                    |
| Dci                     | Dscam                                                                                   |
| Dck                     | Dscaml1                                                                                 |
| Dclk1                   | Dsg1a                                                                                   |
| Dcps                    | Dsg1b                                                                                   |
| Dcst1                   | Dsg2                                                                                    |
| Dctn3                   | Dsn1                                                                                    |
| Dcun1d3                 | Dsp                                                                                     |
| Dcun1d4                 | Dst                                                                                     |
| Dcxr                    | Dstyk                                                                                   |
| Ddah1                   | Dtd2                                                                                    |
| Ddah2                   | Dtl                                                                                     |
| Ddc                     | Dtna                                                                                    |
| Ddc8                    | Dtnb                                                                                    |
| Ddef1                   | Dtnbp1                                                                                  |
| Ddi2                    | Dtx1                                                                                    |
| Ddit3                   | Dtx3                                                                                    |
| Ddit4                   | Dtymk                                                                                   |
| Ddn                     | Dusp10                                                                                  |
| Ddr1                    | Dusp12///Gm26620                                                                        |
| Ddx1                    | Dusp15                                                                                  |
| Ddx11                   | Dusp18                                                                                  |
| Ddx18                   | Dusp19                                                                                  |
| Ddx19b                  | Dusp2                                                                                   |
| Ddx21                   | Dusp26                                                                                  |
| Ddx23                   | Dusp3                                                                                   |
| Ddx27                   | Dusp9                                                                                   |
| Ddx39                   | Dut                                                                                     |
| Ddx5                    | Dvl2                                                                                    |
| Ddx52                   | Dvl3                                                                                    |
| Ddx54                   | Dync1i1                                                                                 |
| Ddx56                   | Dynlrb1                                                                                 |
| Deadc1                  | Dynlt1a///Dynlt1b///Dynlt1c///Dynlt1f                                                   |
| Dedd                    | Dynlt1a///Dynlt1c///Dynlt1f                                                             |
| Dedd2                   | Dynlt1f                                                                                 |
| Defa-ps17               | Dyrk3                                                                                   |
| Degs1                   | Dysf                                                                                    |
| Dek                     | Dyx1c1                                                                                  |
| Deltex3                 | E130203B14Rik                                                                           |
| Dennd1b                 | E230006M18Rik                                                                           |
| Dennd1c                 | E2f1                                                                                    |
| Dennd2d                 | E2f2                                                                                    |
| Dennd4b                 | E2f5                                                                                    |
| Dennd4c                 | E2f6                                                                                    |
| Depdc1a                 | E2f8                                                                                    |
| Depdc1b                 | E430018J23Rik                                                                           |
| Der1                    | EG328264                                                                                |
| Dgat2                   | EG545758 /// Slc10a4                                                                    |
| Dgka                    | EG628498 /// ENSMUSG00000076577 /// Iqk-C /// Iqk-V28 /// LOC100046552 /// LOC100047628 |
| Dgke                    | ENPP2                                                                                   |
| Dgki                    | Eaf2                                                                                    |
| Dhdds                   | Ear1///Ear12///Ear2///Ear3                                                              |
| Dhdh                    | Ear2                                                                                    |
| Dhh                     | Ear3                                                                                    |
| Dhrs13                  | Ears2                                                                                   |
| Dhrs3                   | Ebf1                                                                                    |
| Dhrs7b                  | Ebf2                                                                                    |
| Dhtkd1                  | Ebf3                                                                                    |
| Dhx15                   | Ebi3                                                                                    |
| Dhx58                   | Ece1                                                                                    |
| Diap1                   | Ece2                                                                                    |
| Dio3                    | Ecel1                                                                                   |
| Dirc2                   | Echdc3                                                                                  |
| Dis3                    | Echs1                                                                                   |
| Dis3l                   | Eci1                                                                                    |
| Disc1                   | Eci2                                                                                    |
| Diws1t                  | Eda                                                                                     |
| Dixdc1                  | Edar                                                                                    |
| Dlat                    | Edf1///Gm11964                                                                          |
| Dlg2                    | Edil3                                                                                   |
| Dlg4                    | Edn1                                                                                    |
| Dlg5                    | Edn3                                                                                    |
| Dlgap2                  | Ednra                                                                                   |
| Dlgap4                  | Ednrb                                                                                   |
| Dlk2                    | Eed                                                                                     |
| Dll1                    | Eef1a2                                                                                  |
| Dll4                    | Eef1d                                                                                   |
| Dlst                    | Eef1e1                                                                                  |
| Dlx3                    | Eefsec                                                                                  |
| Dmap1                   | Efcab14                                                                                 |
| Dmpk                    | Efcab2                                                                                  |
| Dmrt3                   | Efcc1                                                                                   |
| Dmrta2                  | Efemp1                                                                                  |
| Dmtf1                   | Efemp2                                                                                  |
| Dmxl1                   | Efhd1                                                                                   |
| Dnahc11                 | Efna2                                                                                   |
| Dnahc2                  | Efna5                                                                                   |
| Dnahc8                  | Efnb2                                                                                   |
| Dnaic2                  | Efnb3                                                                                   |
| Dnaja1                  | Efr3a                                                                                   |
| Dnajib10                | Efr3b                                                                                   |
| Dnajib14                | Eftud2                                                                                  |
| Dnajib4                 | Egfbp2                                                                                  |
| Dnajc12                 | Egfl7                                                                                   |
| Dnajc2                  | Egfl8                                                                                   |
| Dnajc27                 | Egfr                                                                                    |
| Dnajc5g                 | Egr3                                                                                    |
| Dnajc8                  | Ehbp111                                                                                 |
| Dnalc1                  | Ehd1                                                                                    |
| Dnali1                  | Ehd2                                                                                    |
| Dnase1l3                | Ehd3                                                                                    |
| Dncic2                  | Ehf                                                                                     |
| Dnmbp                   | Ehmt2                                                                                   |
| Dnmt1                   | Eid1                                                                                    |
| Dnmt3a                  | Eif1a                                                                                   |
| Dnmt3b                  | Eif1b                                                                                   |
| Dock11                  | Eif2ak1                                                                                 |
| Dock7                   | Eif2ak2                                                                                 |
| Dok1                    | Eif2ak3                                                                                 |
| Dok2                    | Eif2ak4                                                                                 |
| Dok5                    | Eif2b2                                                                                  |
| Dolpp1                  | Eif2c1                                                                                  |
| Donson                  | Eif2c3                                                                                  |
| Dopey2                  | Eif2d                                                                                   |
| Dos                     | Eif2s2                                                                                  |
| Dot1                    | Eif2s3y                                                                                 |
| Dot1l                   | Eif3a                                                                                   |
| Dpagt1                  | Eif3e                                                                                   |
| Dpcr1                   | Eif3h                                                                                   |
| Dpf2                    | Eif3l                                                                                   |
| Dpf3                    | Eif3m                                                                                   |
| Dph1                    | Eif4e                                                                                   |

|                    |                     |
|--------------------|---------------------|
| Dph4               | Eif4e2              |
| Dpp6               | Eif4e3              |
| Dpp8               | Eif4ebp1            |
| Dpysl5             | Eif4ebp2            |
| Dqx1               | Eif4enif1           |
| Drd2               | Eif4g1              |
| Drd5               | Eif4g2              |
| Dsg1a              | Eif4g3              |
| Dspp               | Eif5b               |
| Dst                | Elac1               |
| Dtd1               | Elavl1              |
| Dtx3               | Elavl2              |
| Dtx4               | Elavl3              |
| Dullard            | Elavl4              |
| Dus1l              | Elf5                |
| Dusp1              | Elk1                |
| Dusp10             | Elk3                |
| Dusp16             | Elk4                |
| Dusp3              | Elmo1               |
| Dusp4              | Elmo2               |
| Dusp5              | Elmo3               |
| Dusp7              | Elmod1              |
| Dvl1               | Eln                 |
| Dvl2               | Elovl2              |
| Dync1i2            | Elovl4              |
| Dync1li1           | Elovl6              |
| Dynll1             | Elovl7              |
| Dynll2             | Elp2                |
| Dynlt1a            | Elttd1              |
| Dyrk1a             | Emc2                |
| Dyrk2              | Emc7                |
| Dyrk3              | Emc8                |
| Dyrk4              | Emcn                |
| Dyx1c1             | Emid1               |
| E030030I06Rik      | Emilin1             |
| E130003G02Rik      | Eml5                |
| E130114P18Rik      | Eml6                |
| E130308A19Rik      | Emp3                |
| E130310K16Rik      | Emr4                |
| E230001N04Rik      | En1                 |
| E2F1               | En2                 |
| E2f2               | Enah                |
| E2f6               | Enam                |
| E2f8               | Enc1                |
| E330009J07Rik      | Endod1              |
| E330021D16Rik      | Endog               |
| E430028B21Rik      | Eng                 |
| E4f1               | Eno1                |
| EBF1               | Eno1///Eno1b        |
| EBl3               | Eno2                |
| EEF1G              | Enoph1              |
| EG328479           | Enpep               |
| EG432743           | Enpp2               |
| EG434280           | Enpp3               |
| EG434402           | Enpp4               |
| EG545391           | Enpp5               |
| EG545893           | Entpd1              |
| EG545963           | Entpd7              |
| EG626359           | Env                 |
| EHD1               | Eny2                |
| EIF2S2             | Eomes               |
| EIF4EBP1           | Epas1               |
| ELA3A              | Epb4.1l1            |
| ELA3B              | Epb4.1l2            |
| ELF2               | Epb4.1l3            |
| ELL3               | Epb4.1l4a           |
| ELMOD3             | Epb4.2              |
| ELOVL1             | Epc1                |
| ELP                | Epdr1               |
| EML2               | Epgn                |
| ENO3               | Epha1               |
| ENSMUSG00000048936 | Epha3               |
| EPHA4              | Epha4               |
| ET                 | Epha5               |
| EVISL              | Epha6               |
| EXOSC5             | Epha7               |
| Eaf1               | Epha8               |
| Eaf2               | Ephb1               |
| Ean57              | Ephb2               |
| Ear-ps12           | Ephb4               |
| Ebf2               | Ephb6               |
| Ebf3               | Ephx2               |
| Ebf4               | Epm2a               |
| Ebi3               | Epm2aip1            |
| Ecd                | Epor                |
| Ece1               | Eppk1               |
| Ece2               | Eps15               |
| Ech1               | Eps8l3              |
| Edf1               | Epsti1              |
| Edg5               | Epx                 |
| Edg7               | Epyc                |
| Edg8               | Eqtn                |
| Edn2               | Eral1               |
| Eea1               | Eras                |
| Eef1g              | Erb3                |
| Efcab2             | Erc1                |
| Efcab5             | Erc2                |
| Efhc1              | Ercc1               |
| Efna2              | Ercc2               |
| Efna3              | Ercc6l              |
| Efna4              | Ercc6l2             |
| Efna5              | Ercc8               |
| Efnb2              | Erdr1               |
| Efnb3              | Ereg                |
| Efs                | Erf                 |
| Eftud1             | Erg                 |
| Eftud2             | Ergic1              |
| Egfr               | Ergic2              |
| Egr3               | Ergic3              |
| Ehbp1              | Erh///LOC101056061  |
| Ehbp1l1            | Eri2                |
| Ehd1               | Eri3                |
| Ehd2               | Erlin1              |
| Ehd4               | Ern1                |
| Ehmt1              | Ero1                |
| Eif1               | Ero1lb              |
| Eif2a              | Errfi1              |
| Eif2ak3            | Esam                |
| Eif2b4             | Esco1               |
| Eif2c1             | Esm1                |
| Eif2c2             | Espl1               |
| Eif2c3             | Espn                |
| Eif2s1             | Esr1                |
| Eif3h              | Esr2                |
| Eif3i              | Esrp1               |
| Eif3j              | Esrrb               |
| Eif3k              | Esrrg               |
| Eif3s12            | Esx1                |
| Eif3s2             | Esyt1               |
| Eif4a2             | Etf1                |
| Eif4e2             | Etnk1               |
| Eif4g3             | Etos1               |
| Eif4h              | Ets1                |
| Eif5a              | Etv1///Gm5454       |
| Eif6               | Etv2                |
| Elac2              | Etv3                |
| Elavl2             | Etv4                |
| Elavl3             | Etv5                |
| Elf1               | Etv6                |
| Elf2               | Eva1a               |
| Elk4               | Evc                 |
| ElI2               | Evi2a-evi2b///Evi2b |
| ElI3               | Evl                 |
| Elmod2             | Evx2                |
| Elov1              | Ewsr1               |
| Elov5              | Exo1                |
| Elov6              | Exoc6///Sh3glb1     |
| Eme1               | Exosc1              |
| Emid2              | Exosc10             |

|                 |                |
|-----------------|----------------|
| Emilin1         | Exosc4         |
| Emx1            | Extl2          |
| En1             | Extl3          |
| Enah            | Eya1           |
| Eno2            | Eya2           |
| Eno3            | Eya3           |
| Enoph1          | Eya4           |
| Enpp4           | Ezh1           |
| Entpd1          | Ezr            |
| Entpd5          | F10            |
| Eny2            | F11            |
| Eomes           | F11r           |
| Ep300           | F13a1          |
| Epb4.1          | F13b           |
| Epb4.1l1        | F2r            |
| Epb4.1l2        | F2rl1          |
| Epb4.1l4a       | F2rl3          |
| Epha3           | F3             |
| Epha5           | F5             |
| Epha7           | F630111L10Rik  |
| Ephb1           | F7             |
| Ephb2           | F9             |
| Ephb4           | FAM198A        |
| Ephx3           | FGF7           |
| Epn1            | FIGNL2         |
| Epn3            | Fa2h           |
| Epo             | Fabp1          |
| Eprs            | Fabp2          |
| Eps8R1          | Fabp3          |
| Eps8l1          | Fabp4          |
| Eral1           | Fabp5          |
| Erap1           | Fabp7          |
| Erb2            | Fabp9          |
| Erb2ip          | Fads1          |
| Erb3            | Fads2          |
| Erc1            | Fads3          |
| Erd2.1          | Faf1           |
| Ergic2          | Fahd1          |
| Erlin1          | Fam101b        |
| Ermp1           | Fam104a        |
| Ern1            | Fam105a        |
| Espl1           | Fam109b        |
| Espn            | Fam110a        |
| Esr1            | Fam110c        |
| Esr2            | Fam111a        |
| Esrp1           | Fam114a1       |
| Etf1            | Fam115c        |
| Etf2            | Fam117b        |
| Etf3            | Fam118a        |
| Etf4            | Fam120a        |
| Ets1            | Fam120b        |
| Etv1            | Fam122a        |
| Etv3            | Fam126a        |
| Etv4            | Fam129a        |
| Etv5            | Fam131a        |
| Etv6            | Fam131b        |
| Evi1            | Fam133b        |
| Evl             | Fam13c         |
| Evx1            | Fam149a        |
| Ewsr1           | Fam160b1       |
| Exdl1           | Fam161a        |
| Exoc2           | Fam166a        |
| Exoc3l2         | Fam169a        |
| Exoc6           | Fam171b        |
| Exoc7           | Fam174a        |
| Exod1           | Fam174b        |
| Exosc4          | Fam181b        |
| Ext1            | Fam184b        |
| Ext2            | Fam189b        |
| Extl1           | Fam196b        |
| Extl2           | Fam198b        |
| Extl3           | Fam19a5        |
| Eya3            | Fam20b         |
| Eya4            | Fam20c         |
| Ezh1            | Fam21          |
| Ezh2            | Fam210b        |
| F11r            | Fam213a        |
| F2              | Fam216a        |
| F2rl1           | Fam222b        |
| F630043A04Rik   | Fam227b        |
| F730014I05Rik   | Fam26e         |
| F830021D11Rik   | Fam3c          |
| FAE             | Fam43a         |
| FAM123B         | Fam45a         |
| FAM129C         | Fam46c         |
| FAM82A2         | Fam49b         |
| FANCF           | Fam64a         |
| FBP11           | Fam65a         |
| FBXO16          | Fam65b         |
| FCER1G          | Fam65c         |
| FCER2           | Fam69b         |
| FCGR2C///FCGR2B | Fam73b         |
| FCGRT           | Fam83f         |
| FCRL4           | Fam83g         |
| FCRL5           | Fam83h         |
| FCRLA           | Fam86          |
| FKBP1b-B        | Fam89b///Ssca1 |
| FLII///FLI1     | Fam92a         |
| FLJ39739        | Fam96a         |
| FLRG            | Fanca          |
| FOXP1           | Fancc          |
| FOXS1           | Fancc          |
| FTH1            | Fancg          |
| FTL             | Fanci          |
| FUS             | Fancm          |
| FYN             | Fank1          |
| Fa2h            | Fap            |
| Fabp3           | Far1           |
| Fads2           | Farp1          |
| Fahd1           | Farp2          |
| Faim            | Farsa          |
| Fam102a         | Farsb          |
| Fam110c         | Fas            |
| Fam111a         | Fasl           |
| Fam123b         | Fasn           |
| Fam129b         | Fastk          |
| Fam164c         | Fastkd2        |
| Fam187a         | Fbln1          |
| Fam20b          | Fbln2          |
| Fam23a          | Fbln5          |
| Fam49b          | Fbln7          |
| Fam4a2          | Fbn1           |
| Fam57b          | Fbn2           |
| Fam5c           | Fbp1           |
| Fam73a          | Fbp2           |
| Fam76b          | Fbrs           |
| Fam77D          | Fbxl15         |
| Fam82a2         | Fbxl3          |
| Fam83f          | Fbxo16         |
| Fanca           | Fbxo17         |
| Fancc2          | Fbxo2          |
| Fanci           | Fbxo21         |
| Farsa           | Fbxo22         |
| Farsla          | Fbxo27         |
| Fasn            | Fbxo3          |
| Fat1            | Fbxo31         |
| Fat4            | Fbxo32         |
| Fblim1          | Fbxo33         |
| Fbp1            | Fbxo36         |
| Fbxl10          | Fbxo4          |
| Fbxl11          | Fbxo6          |
| Fbxl12          | Fbxo9          |
| Fbxl13          | Fbxw11         |
| Fbxl14          | Fbxw14         |
| Fbxl15          | Fbxw2          |
| Fbxl19          | Fbxw7          |
| Fbxl20          | Fbxw8          |
| Fbxl22          | Fcer1a         |
| Fbxo10          | Fcer1g         |

|               |                                                                 |
|---------------|-----------------------------------------------------------------|
| Fbxo11        | Fcer2a                                                          |
| Fbxo2         | Fcgr1                                                           |
| Fbxo25        | Fcgr2b                                                          |
| Fbxo27        | Fcgr3                                                           |
| Fbxo31        | Fcgr4                                                           |
| Fbxo36        | Fcgrt                                                           |
| Fbxo4         | Fcho1                                                           |
| Fbxo42        | Fcrl1                                                           |
| Fbxo44        | Fcrla                                                           |
| Fbxo45        | Fdft1                                                           |
| Fbxo47        | Fdps                                                            |
| Fbxo6         | Fech                                                            |
| Fbxo7         | Fem1a                                                           |
| Fbxo8         | Ferd3l                                                          |
| Fbxo9         | Fermt2                                                          |
| Fbxw4         | Fermt3                                                          |
| Fbxw5         | Fert2                                                           |
| Fbxw6         | Fes                                                             |
| Fbxw7         | Fetub                                                           |
| Fbxw8         | Fez1                                                            |
| Fcer1g        | Fez2                                                            |
| Fcgr1         | Fezf2                                                           |
| Fcgr3         | Ffar2                                                           |
| Fchsd2        | Fgd1                                                            |
| Fdft1         | Fgd6                                                            |
| Fem1b         | Fgf10                                                           |
| Fem1c         | Fgf11                                                           |
| Fer1l3        | Fgf12                                                           |
| Fermt1        | Fgf13                                                           |
| Fev           | Fgf14                                                           |
| Fgd5          | Fgf16                                                           |
| Fgf11         | Fgf17                                                           |
| Fgf12         | Fgf18                                                           |
| Fgf15         | Fgf2                                                            |
| Fgf18         | Fgf22                                                           |
| Fgf2          | Fgf23                                                           |
| Fgf23         | Fgf3                                                            |
| Fgf4          | Fgf4                                                            |
| Fgf8          | Fgf5                                                            |
| Fgf9          | Fgf6                                                            |
| Fgfr1         | Fgf7                                                            |
| Fgfr1op2      | Fgfbp1                                                          |
| Fgfr2         | Fgfr1                                                           |
| Fgfr4         | Fgfr1op2                                                        |
| Fgr           | Fgfr2                                                           |
| Fhl3          | Fgfr4                                                           |
| Fibcd1        | Fgfr1l                                                          |
| Fign          | Fgl1                                                            |
| Fignl1        | Fgl2                                                            |
| Fis1          | Fgr                                                             |
| Fkbp10        | Fhit                                                            |
| Fkbp15        | Fhl2                                                            |
| Fkbp1a        | Fhl4                                                            |
| Fkbp1b        | Fhl5                                                            |
| Fkbp4         | Fhod3                                                           |
| Fkbp5         | Fibin                                                           |
| Fkhl18        | Fibp                                                            |
| Fkhr2         | Ficd                                                            |
| Flad1         | Figf                                                            |
| Flame-3       | Figla                                                           |
| Ficn          | Fign                                                            |
| Flot2         | Fip1l1                                                          |
| Flt3l         | Fis1                                                            |
| Flt4          | Fkbp10                                                          |
| Fmnl1         | Fkbp11                                                          |
| Fmo5          | Fkbp1a                                                          |
| Fnbp1l        | Fkbp1b                                                          |
| Fndc3a        | Fkbp4///LOC102642559                                            |
| Fndc5         | Fkbp5                                                           |
| Fnip1         | Fkbp7                                                           |
| Fntb          | Fktn                                                            |
| Fos           | Flad1///Lenep                                                   |
| Fosb          | Ficn                                                            |
| Fosl2         | Fli1                                                            |
| Foxb1         | Flii                                                            |
| Foxb2         | Flna                                                            |
| Foxc2         | Flot2                                                           |
| Foxd1         | Flrt2                                                           |
| Foxd2         | Flt1                                                            |
| Foxd3         | Flt3                                                            |
| Foxe1         | Flt4                                                            |
| Foxg1         | Flywch1                                                         |
| Foxj2         | Flywch2                                                         |
| Foxj3         | Fmn2                                                            |
| Foxk1         | Fmnl3                                                           |
| Foxl1         | Fmo1                                                            |
| Foxl2         | Fmo2                                                            |
| Foxm1         | Fmo3                                                            |
| Foxn3         | Fmo4                                                            |
| Foxn4         | Fmod                                                            |
| Foxo1         | Fmr1                                                            |
| Foxo3a        | Fmr1nb                                                          |
| Foxo4         | Fn1                                                             |
| Foxp1         | Fn3k                                                            |
| Foxp1a        | Fnbp1                                                           |
| Foxq1         | Fnbp4                                                           |
| Fpr-rs3       | Fndc1                                                           |
| Frmd4a        | Fndc3a                                                          |
| Frmd4b        | Fndc4                                                           |
| Frmd5         | Fndc7                                                           |
| Frs2          | Fntb                                                            |
| Fry           | Folr4                                                           |
| Fscn2         | Fosb                                                            |
| Fscn3         | Fosl1                                                           |
| Fsd2          | Fosl2                                                           |
| Fsrg3         | Foxa1                                                           |
| Fst           | Foxa3                                                           |
| Fstl3         | Foxb2                                                           |
| Fstl4         | Foxc2                                                           |
| Ftsj3         | Foxd1                                                           |
| Ftsjd2        | Foxd3                                                           |
| Fubp1         | Foxf1                                                           |
| Fubp3         | Foxf2                                                           |
| Fus           | Foxg1                                                           |
| Fusip1        | Foxh1                                                           |
| Fut10         | Foxi1                                                           |
| Fut9          | Foxj1                                                           |
| Fxc1          | Foxk1                                                           |
| Fxr2          | Foxk2                                                           |
| Fyn           | Foxm1                                                           |
| Fzd1          | Foxn1                                                           |
| Fzd6          | Foxo1                                                           |
| Fzd7          | Foxo3                                                           |
| Fzd8          | Foxo4                                                           |
| G2ad          | Foxp2                                                           |
| G3BP          | Fpr-rs3                                                         |
| G3bp1         | Fpr1                                                            |
| G5pr          | Fpr2                                                            |
| G630016D24Rik | Fpr3                                                            |
| G6pc          | Frat1                                                           |
| GABA-B-R      | Frem1                                                           |
| GADD45B       | Frk                                                             |
| GAL3ST4       | Frmd3                                                           |
| GCET2         | Frmd4b                                                          |
| GGTLC1        | Frmd6                                                           |
| GJA8          | Frmpd4                                                          |
| GLI3          | Frs3                                                            |
| GLT8D1        | Frzb                                                            |
| GLUT4         | Fscn1                                                           |
| GLYAT///CAT   | Fsip1                                                           |
| GMPS          | Fstl1                                                           |
| GNAI2         | Ftcd                                                            |
| GNAS          | Fth1                                                            |
| GNAT1         | Fthl17///Gm14458///Gm14499///Gm14511///Gm5634                   |
| GNB1          | Ftl1///Gm20746///LOC100862446                                   |
| GNB2          | Ftl1///Gm20746///LOC100862446///Mir692-1///Mir692-2b///Mir692-3 |
| GOBLIN        | Ftsj3                                                           |
| GOLGA9P       | Fubp1                                                           |
| GOT2          | Fuca1                                                           |

|            |                |
|------------|----------------|
| GPBP       | Fundc1         |
| GPR18      | Fundc2         |
| GPR84      | Fus            |
| GRINL1A    | Fut10          |
| GSK3A      | Fut2           |
| GSTP1      | Fut7           |
| Gab1       | Fut8           |
| Gabarap    | Fut9           |
| Gabarapl2  | Fv1            |
| Gabbr1     | Fxr2           |
| Gabpb2     | Fxyd1          |
| Gabrb1     | Fxyd2          |
| Gabrb2     | Fxyd3          |
| Gabrb3     | Fxyd5          |
| Gabrg3     | Fxyd6          |
| Gad2       | Fxyd7          |
| Gadd45b    | Fyb            |
| Gadd45g    | Fyn            |
| Gadd45gip1 | Fzd2           |
| Gal3st1    | Fzd3           |
| Gal3st3    | Fzd4           |
| Gale       | Fzd5           |
| Galk1      | Fzd6           |
| Galnt6     | Fzd7           |
| Galr2      | Fzd8           |
| Ganc       | G0s2           |
| Gapdh      | G6pc           |
| Gapdhs     | G6pc2          |
| Gapvd1     | G6pc3          |
| Garnl4     | G6pd2///G6pdx  |
| Gart       | GLIS3          |
| Gas1       | GPR98          |
| Gas2       | Gaa            |
| Gas2l1     | Gab3           |
| Gas5       | Gabarap        |
| Gas8       | Gabarapl1      |
| Gast       | Gabarapl2      |
| Gata1      | Gabbr1         |
| Gata3      | Gabra1         |
| Gatad2a    | Gabra2         |
| Gatad2b    | Gabra6         |
| Gatm       | Gabrb1         |
| Gba        | Gabrb3         |
| Gbf1       | Gabrd          |
| Gbl        | Gabre          |
| Gbp1       | Gabrg1         |
| Gbp11      | Gabrq          |
| Gbp2       | Gabbr1         |
| Gbp3       | Gabbr2         |
| Gbx1       | Gad2           |
| Gbx2       | Gadd45a        |
| Gca        | Gadd45b        |
| Gchfr      | Gadd45g        |
| Gcn5l2     | Gadd45gip1     |
| Gcnt2      | Gal            |
| Gcnt3      | Galc           |
| Gcnt4      | Gale           |
| Gcs1       | Galk1          |
| Gda        | Galm           |
| Gdap10     | Galns          |
| Gdap1l1    | Galnt1         |
| Gdi2       | Galnt10        |
| Gdpd3      | Galnt11        |
| Gdpd5      | Galnt13        |
| Gemin4     | Galnt16        |
| Gemin7     | Galnt2         |
| Gene ID    | Galnt4         |
| Gfer       | Galnt6         |
| Gfi1b      | Galnt7         |
| Gfpt2      | Galntl1        |
| Gfra2      | Galntl5        |
| Gga1       | Galr2          |
| Ggnbp1     | Galr3///Gcat   |
| Ggnbp2     | Gamt           |
| Ggps1      | Ganab          |
| Ggtl3      | Gap43          |
| Ghrh       | Gapdh          |
| Gigyf2     | Gareml         |
| Gip        | Gas1           |
| Gipc2      | Gas2           |
| Git1       | Gas5           |
| Giyd2      | Gas5///Snord47 |
| Gja10      | Gas6           |
| Gja7       | Gas8           |
| Gjb2       | Gast           |
| Gjc1       | Gata1          |
| Gkap1      | Gata2          |
| Glb1l      | Gata3          |
| Glb1l3     | Gata5          |
| Glce       | Gatad1         |
| Gldn       | Gatad2b        |
| Glg1       | Gatm           |
| Gli1       | Gatsl2         |
| Gli3       | Gba2           |
| Glipr2     | Gbas           |
| Glis1      | Gbf1           |
| Glis2      | Gbgt1          |
| Glmn       | Gbp2           |
| Glo1       | Gbp3           |
| Glod4      | Gbp4///Gbp8    |
| Glp1r      | Gbp6           |
| Gls2       | Gbp7           |
| Glt8d2     | Gbp8           |
| Glt8d4     | Gbx2           |
| Gltscr1    | Gca            |
| Gltscr2    | Gcap8          |
| Glul       | Gcc2           |
| Gm10053    | Gcdh           |
| Gm10069    | Gcet2          |
| Gm10073    | Gcg            |
| Gm10087    | Gch1           |
| Gm10126    | Gck            |
| Gm10180    | Gckr           |
| Gm10193    | Gcm1           |
| Gm10233    | Gcm2           |
| Gm10237    | Gcnt1          |
| Gm10294    | Gcnt2          |
| Gm10351    | Gda            |
| Gm10384    | Gdap1          |
| Gm10462    | Gdap10         |
| Gm10565    | Gdap1l1        |
| Gm10812    | Gde1           |
| Gm11042    | Gdf10          |
| Gm11065    | Gdf11          |
| Gm11131    | Gdf15          |
| Gm11172    | Gdf2           |
| Gm11201    | Gdf5           |
| Gm11229    | Gdf9           |
| Gm11256    | Gdi1           |
| Gm11274    | Gdi2           |
| Gm11291    | Gdnf           |
| Gm11292    | Gdpd3          |
| Gm11370    | Gdpd5          |
| Gm114      | Gem            |
| Gm11411    | Gemin8         |
| Gm11426    | Gfap           |
| Gm11437    | Gfi1           |
| Gm11462    | Gfi1b          |
| Gm11477    | Gfpt1          |
| Gm11525    | Gfpt2          |
| Gm11566    | Gfra1          |
| Gm1157     | Gfra2          |
| Gm11627    | Gfra3          |
| Gm11648    | Gga1           |
| Gm11649    | Ggact          |
| Gm11672    | Ggct           |
| Gm11692    | Ggcx           |
| Gm11707    | Ggnbp2         |
| Gm11744    | Ggps1          |

|         |                                                                                                |
|---------|------------------------------------------------------------------------------------------------|
| Gm11761 | Ggt1                                                                                           |
| Gm11774 | Ggt5                                                                                           |
| Gm11792 | Ggt7                                                                                           |
| Gm11803 | Gh                                                                                             |
| Gm11958 | Ghdc                                                                                           |
| Gm12019 | Ghr                                                                                            |
| Gm12107 | Ghrh                                                                                           |
| Gm12225 | Ghrhr                                                                                          |
| Gm12243 | Ghrl                                                                                           |
| Gm12369 | Gif                                                                                            |
| Gm12397 | Gimap1                                                                                         |
| Gm12466 | Gimap4                                                                                         |
| Gm12532 | Gimap6                                                                                         |
| Gm12579 | Gimap7                                                                                         |
| Gm12592 | Ginm1                                                                                          |
| Gm12597 | Gipc1                                                                                          |
| Gm12639 | Gipc2                                                                                          |
| Gm12646 | Gipc3                                                                                          |
| Gm12676 | Git2                                                                                           |
| Gm12681 | Gja1                                                                                           |
| Gm12714 | Gja10                                                                                          |
| Gm12743 | Gja3                                                                                           |
| Gm12780 | Gja8                                                                                           |
| Gm12786 | Gjb1                                                                                           |
| Gm12852 | Gjb2                                                                                           |
| Gm12913 | Gjb3                                                                                           |
| Gm12974 | Gjb5                                                                                           |
| Gm13003 | Gjb6                                                                                           |
| Gm13033 | Gjc1                                                                                           |
| Gm13062 | Gjc2                                                                                           |
| Gm13201 | Gjc3                                                                                           |
| Gm13203 | Gjd2                                                                                           |
| Gm13207 | Gk2                                                                                            |
| Gm13218 | Gkap1                                                                                          |
| Gm13229 | Gkn1                                                                                           |
| Gm13313 | Gkn2                                                                                           |
| Gm13334 | Gla                                                                                            |
| Gm13380 | Glb1                                                                                           |
| Gm13394 | Glb1l                                                                                          |
| Gm13402 | Glcci1                                                                                         |
| Gm13446 | Gldc                                                                                           |
| Gm13540 | Gldn                                                                                           |
| Gm13553 | Gli1                                                                                           |
| Gm13666 | Gli2                                                                                           |
| Gm13667 | Gli3                                                                                           |
| Gm13699 | Glipr1l2                                                                                       |
| Gm13802 | Glipr2                                                                                         |
| Gm13818 | Glis1                                                                                          |
| Gm13860 | Glis2                                                                                          |
| Gm13889 | Glo1                                                                                           |
| Gm13930 | Glr1                                                                                           |
| Gm13998 | Glr4                                                                                           |
| Gm14006 | Glrx                                                                                           |
| Gm14010 | Glrx2                                                                                          |
| Gm14129 | Glt25d1                                                                                        |
| Gm14260 | Glul                                                                                           |
| Gm14337 | Glyat                                                                                          |
| Gm14383 | Glycam1                                                                                        |
| Gm14389 | Glyctk                                                                                         |
| Gm14458 | Gm10015///Gm10145///Gm10705///Gm5858///Ube2l3                                                  |
| Gm14471 | Gm10058///Gm10096///Gm10147///Gm10230///Gm10486///Gm10487///Gm10488///Gm14525///Gm14632///Gm   |
| Gm14472 | Gm10094///Sap18                                                                                |
| Gm14486 | Gm10193///Zfp706                                                                               |
| Gm14502 | Gm10228                                                                                        |
| Gm14594 | Gm10229                                                                                        |
| Gm14612 | Gm10256///Gm10352///Gm21677///Gm21693///Gm21704///Gm21708///Gm4064///Rbmy                      |
| Gm14625 | Gm10340///Gm10406///Gm2888///Gm2897///Gm3005///Gm3095///Gm3115///Gm3164///Gm3173///Gm3239///C  |
| Gm14780 | Gm10340///Gm10409///Gm16525///Gm2897///Gm3002///Gm3005///Gm3095///Gm3115///Gm3164///Gm3173///  |
| Gm14808 | Gm10349///Gm9386///Nutf2///Nutf2-ps1                                                           |
| Gm14876 | Gm10400                                                                                        |
| Gm14886 | Gm10436///Gm2042///Oog1                                                                        |
| Gm14933 | Gm10439///Gm15080///Gm15085///Gm15093///Gm15107///Gm15114///Gm15128///Luzp4///Ott              |
| Gm14940 | Gm10664                                                                                        |
| Gm14983 | Gm10817                                                                                        |
| Gm15051 | Gm10997                                                                                        |
| Gm15101 | Gm11149                                                                                        |
| Gm15333 | Gm11397///Serpib9e///Serpib9f///Serpib9g                                                       |
| Gm15459 | Gm11437                                                                                        |
| Gm15477 | Gm11567                                                                                        |
| Gm15480 | Gm11767                                                                                        |
| Gm15527 | Gm11787///Lyn                                                                                  |
| Gm15529 | Gm11944                                                                                        |
| Gm15613 | Gm12264                                                                                        |
| Gm15708 | Gm12606                                                                                        |
| Gm15716 | Gm12617///Gm4802                                                                               |
| Gm1574  | Gm12816///Gm5879///Rpl3                                                                        |
| Gm15742 | Gm12942///Zmym6                                                                                |
| Gm15774 | Gm13102///Pramel4                                                                              |
| Gm15803 | Gm13139                                                                                        |
| Gm15854 | Gm13152                                                                                        |
| Gm15856 | Gm13271///Gm13272///Gm13275///Gm13276///Gm13277///Gm13278///Gm13279///Gm13283///Gm13285///Gm   |
| Gm15880 | Gm13363///Ptp4a1                                                                               |
| Gm15958 | Gm13583                                                                                        |
| Gm15975 | Gm13669///Plp2                                                                                 |
| Gm16047 | Gm13770///Gm2573///Wdr83os                                                                     |
| Gm16053 | Gm13889                                                                                        |
| Gm16079 | Gm13999                                                                                        |
| Gm16142 | Gm14277///Snrpd1                                                                               |
| Gm16234 | Gm14680///Sms                                                                                  |
| Gm16303 | Gm15270                                                                                        |
| Gm16433 | Gm15393///Gm15393                                                                              |
| Gm16508 | Gm15455///Rbm10                                                                                |
| Gm16523 | Gm15483///LOC102642137///Rps13///Rps13-ps4                                                     |
| Gm16546 | Gm1549                                                                                         |
| Gm16834 | Gm15498                                                                                        |
| Gm16854 | Gm15713                                                                                        |
| Gm16862 | Gm15776///Gng5                                                                                 |
| Gm16983 | Gm16340///Ifi203///LOC100862473                                                                |
| Gm17025 | Gm16340///Ifi203///LOC100862473///LOC102641031                                                 |
| Gm17029 | Gm16343///Gm16343                                                                              |
| Gm17043 | Gm16489                                                                                        |
| Gm17177 | Gm1653                                                                                         |
| Gm17184 | Gm17066///Rbm26                                                                                |
| Gm17194 | Gm17344///Gm17344                                                                              |
| Gm17213 | Gm17748///Ppih                                                                                 |
| Gm17276 | Gm1976                                                                                         |
| Gm17294 | Gm20172                                                                                        |
| Gm17401 | Gm20274                                                                                        |
| Gm17407 | Gm20362                                                                                        |
| Gm17439 | Gm20559                                                                                        |
| Gm17440 | Gm20737///Gm20772///Gm20773///Gm20777///Gm20793///Gm20795///Gm20807///Gm20827///Gm20831///Gm.  |
| Gm17529 | Gm20738///Gm20747///Gm20791///Gm20799///Gm20801///Gm20803///Gm20804///Gm20805///Gm20806///Gm.  |
| Gm17538 | Gm20767                                                                                        |
| Gm17544 | Gm2083///Mup1///Mup10///Mup12///Mup13///Mup14///Mup15///Mup16///Mup19///Mup2///Mup7///Mup8///I |
| Gm17608 | Gm21098///Rhox4a///Rhox4b///Rhox4c///Rhox4d///Rhox4e///Rhox4f///Rhox4g                         |
| Gm17636 | Gm21320///LOC100048884///Mup1///Mup10///Mup11///Mup14///Mup16///Mup19///Mup2///Mup3///Mup9     |
| Gm17709 | Gm21451///Loxl2                                                                                |
| Gm19031 | Gm21540///Tmed2                                                                                |
| Gm2022  | Gm21596///Gm6115///Hmgb1///LOC102635075                                                        |
| Gm20443 | Gm26568                                                                                        |
| Gm20539 | Gm266                                                                                          |
| Gm216   | Gm2682                                                                                         |
| Gm2199  | Gm2a                                                                                           |
| Gm2244  | Gm3362///Gm6177///Gm8112///Gm8137///Gm8158///Gm8264///Gm8290///Rpl23a                          |
| Gm239   | Gm3417///Gm3448///Tcte3                                                                        |
| Gm2822  | Gm3470///Rbpms2                                                                                |
| Gm2959  | Gm3579                                                                                         |
| Gm3460  | Gm3716                                                                                         |
| Gm3608  | Gm3837///Pdcd5                                                                                 |
| Gm3828  | Gm4024///Tmed10                                                                                |
| Gm3834  | Gm4120///Gm4983///Gm9292///LOC101055823                                                        |
| Gm4262  | Gm428                                                                                          |
| Gm443   | Gm4354                                                                                         |
| Gm444   | Gm4736///Gm8882///Prb1///Prpmp5                                                                |
| Gm4461  | Gm4887///Twf1                                                                                  |
| Gm4609  | Gm5415                                                                                         |
| Gm4732  | Gm5451///Rpl9                                                                                  |
| Gm4798  | Gm5481///Gm6109///Gm6570///Gm7429///Rpl30                                                      |
| Gm4968  | Gm5526///Gm8894///LOC102643184///Myl6                                                          |

|          |                                            |
|----------|--------------------------------------------|
| Gm5058   | Gm5595                                     |
| Gm5138   | Gm5607                                     |
| Gm525    | Gm561                                      |
| Gm5292   | Gm568                                      |
| Gm5447   | Gm5802                                     |
| Gm5544   | Gm6211                                     |
| Gm5546   | Gm6277                                     |
| Gm5551   | Gm6682///Tuba1a                            |
| Gm561    | Gm6750///Gm7931///Gm9525///Hmgn2           |
| Gm572    | Gm6793///Hnrnpa3                           |
| Gm5755   | Gm6910///Rybp                              |
| Gm6020   | Gm7040///Prl2c2///Prl2c3///Prl2c4          |
| Gm603    | Gm7040///Prl2c2///Prl2c3///Prl2c4///Prl2c5 |
| Gm608    | Gm8479                                     |
| Gm6097   | Gm8539///Zbtb8os                           |
| Gm6320   | Gm885                                      |
| Gm6344   | Gm9159                                     |
| Gm6356   | Gm9222                                     |
| Gm6429   | Gm9706                                     |
| Gm6565   | Gm9706///Isq15                             |
| Gm6568   | Gm9757                                     |
| Gm6659   | Gm9780///Plac9a///Plac9b                   |
| Gm6721   | Gm9798                                     |
| Gm6741   | Gm9817                                     |
| Gm6846   | Gm9839                                     |
| Gm6923   | Gm9840///Rbx1                              |
| Gm694    | Gm9905                                     |
| Gm7206   | Gmcl1                                      |
| Gm7237   | Gmfb                                       |
| Gm7358   | Gmppa                                      |
| Gm7589   | Gmppb                                      |
| Gm784    | Gmpr                                       |
| Gm7851   | Gna11                                      |
| Gm807    | Gna12                                      |
| Gm8250   | Gna14                                      |
| Gm8444   | Gnai2                                      |
| Gm854    | Gnao1                                      |
| Gm879    | Gnaq                                       |
| Gm8835   | Gnas                                       |
| Gm9105   | Gnat1                                      |
| Gm920    | Gnat2                                      |
| Gm9244   | Gnaz                                       |
| Gm944    | Gnb1                                       |
| Gm9530   | Gnb4                                       |
| Gm960    | Gnb5                                       |
| Gm9727   | Gne                                        |
| Gm9742   | Gng10                                      |
| Gm9758   | Gng11                                      |
| Gm9836   | Gng13                                      |
| Gm9917   | Gng2                                       |
| Gmeb1    | Gng3                                       |
| Gmfg     | Gng4                                       |
| Gmpr2    | Gng8                                       |
| Gna-rs1  | Gngt1                                      |
| Gna11    | Gnl2                                       |
| Gna13    | Gnpda2                                     |
| Gnai1    | Gnpnat1                                    |
| Gnai3    | Gnrhr                                      |
| Gnb11    | Gns                                        |
| Gnb2     | Golga3                                     |
| Gnb211   | Golm1                                      |
| Gnb3     | Golph3                                     |
| Gnb5     | Golph3l                                    |
| Gne      | Golt1a                                     |
| Gng12    | Golt1b                                     |
| Gng7     | Gopc                                       |
| Gngt2    | Gorasp2                                    |
| Gnl2     | Gosr2                                      |
| Gnmt     | Got2                                       |
| Gnpnat1  | Gp1ba                                      |
| Gns      | Gp1bb///Sept5                              |
| Golm1    | Gp2                                        |
| Golph3   | Gp49a /// Lilrb4                           |
| Golph3l  | Gp49a///Lilrb4                             |
| Got1l1   | Gp9                                        |
| Gpa33    | Gpa33                                      |
| Gpaa1    | Gpaa1                                      |
| Gpatch2  | Gpam                                       |
| Gpbp1    | Gpank1                                     |
| Gpc4     | Gpatch2                                    |
| Gpc6     | Gpatch4                                    |
| Gpha2    | Gpc1                                       |
| Gphn     | Gpc2                                       |
| Gpr107   | Gpc3                                       |
| Gpr108   | Gpc4                                       |
| Gpr125   | Gpc6                                       |
| Gpr128   | Gpc6 /// LOC100045283                      |
| Gpr142   | Gpcpd1                                     |
| Gpr15    | Gpd1                                       |
| Gpr152   | Gpd2                                       |
| Gpr157   | Gpm6a                                      |
| Gpr162   | Gpm6b                                      |
| Gpr177   | Gpr108                                     |
| Gpr19    | Gpr109a                                    |
| Gpr21    | Gpr110                                     |
| Gpr39    | Gpr12                                      |
| Gpr6     | Gpr124                                     |
| Gpr84    | Gpr132                                     |
| Gpr89    | Gpr133                                     |
| Gpr98    | Gpr137b                                    |
| Gprc5c   | Gpr137b///Gpr137b-ps                       |
| Gps1     | Gpr143                                     |
| Gps2     | Gpr146                                     |
| Gpsm2    | Gpr153                                     |
| Gpt2     | Gpr162                                     |
| Gramd1b  | Gpr165                                     |
| Gramd1c  | Gpr177                                     |
| Gramd3   | Gpr180                                     |
| Gramp3   | Gpr182                                     |
| Grb14    | Gpr3                                       |
| Grb2     | Gpr31b                                     |
| Grcc10   | Gpr37                                      |
| Greb1    | Gpr37l1                                    |
| Grhl2    | Gpr63                                      |
| Grhl3    | Gpr65                                      |
| Grid2    | Gpr83                                      |
| Grifin   | Gpr85                                      |
| Grik2    | Gpr87                                      |
| Grin2a   | Gprasp1                                    |
| Grin2d   | Gprasp2                                    |
| Grinl1a  | Gprc5b                                     |
| Grip1    | Gprc5c                                     |
| Gripap1  | Gprc6a                                     |
| Grk4     | Gprin1                                     |
| Grk5     | Gps1                                       |
| Grlf1    | Gpsm1                                      |
| Grm6     | Gpsm3                                      |
| Grm7     | Gpt2                                       |
| Grm8     | Gpx1                                       |
| Grm8A    | Gpx2                                       |
| Grn      | Gpx3                                       |
| Grpel1   | Gpx4                                       |
| Gse1     | Gpx5                                       |
| Gsta1    | Gpx6                                       |
| Gsta4    | Gpx7                                       |
| Gstm1    | Gpx8                                       |
| Gsx1     | Gramd1a                                    |
| Gtdc1    | Grap2                                      |
| Gtf2a1   | Grasp                                      |
| Gtf2h2   | Grb10                                      |
| Gtf2h4   | Grb14                                      |
| Gtf2i    | Grb2                                       |
| Gtf2ird1 | Grb7                                       |
| Gtf2ird2 | Grcc10                                     |
| Gtf3c2   | Greb1l                                     |
| Gtf3c6   | Grem1                                      |
| Gtl-13   | Grem2                                      |
| Gtl3     | Grhl1                                      |
| Gtpbp5   | Grhl1 /// LOC100043996                     |

|                   |                                          |
|-------------------|------------------------------------------|
| Gtpbp6            | Grhl2                                    |
| Guca1a            | Grhl3                                    |
| Gylt1b            | Gria1                                    |
| Gzmb              | Gria2                                    |
| H13               | Gria3                                    |
| H1f0              | Gria4                                    |
| H1foo             | Grid1                                    |
| H2-BI             | Grid2                                    |
| H2-DMA            | Grid2ip                                  |
| H2-Ke6            | Grik5                                    |
| H2-T23            | Grin1                                    |
| H2-T24            | Grin2b                                   |
| H2-T3             | Grin2d                                   |
| H2afj             | Grin3a                                   |
| H2afx             | Grin3b                                   |
| H2afz             | Grk1                                     |
| H3f3a             | Grk4                                     |
| H3f3b             | Grk5                                     |
| H60b              | Grk6                                     |
| H6pd              | Grm1                                     |
| HADH              | Grm8                                     |
| HAS3              | Grp                                      |
| HDGF2             | Grpr                                     |
| HEATR1            | Grsf1                                    |
| HIGD1A            | Grtp1                                    |
| HIRIP3            | Grwd1                                    |
| HIST1H2BK         | Gsdmc///Gsdmc2                           |
| HIST2H2AA3        | Gsg2                                     |
| HIST2H2BF         | Gsn                                      |
| HIST2H3A#HIST2H3C | Gspt2                                    |
| HLA-DMA           | Gsr                                      |
| HLA-DMB           | Gsta3                                    |
| HLA-DOA           | Gsta4                                    |
| HLA-DPA1          | Gstm1                                    |
| HLA-DPB1          | Gstm2                                    |
| HLA-DQA1          | Gstm5                                    |
| HLA-DRA           | Gstm6                                    |
| HMBOX1            | Gsto2                                    |
| HMGN4             | Gstp1                                    |
| HNRNPA1L2         | Gstt1                                    |
| HNRNPK            | Gstt2                                    |
| HSPA1B///HSPA1A   | Gstz1                                    |
| HSPA4L            | Gsx2                                     |
| Haao              | Gt(ROSA)26Sor                            |
| Hace1             | Gtdc2                                    |
| Hadha             | Gtf2a1                                   |
| Hadhb             | Gtf2e2                                   |
| Hagh              | Gtf2f1                                   |
| Haghl             | Gtf2h4                                   |
| Hamp              | Gtf2i                                    |
| Hamp2             | Gtf2ird1                                 |
| Hapl4             | Gtf2ird2                                 |
| Has2              | Gtf3c1                                   |
| Has3              | Gtl3                                     |
| Hax1              | Gtpbp1                                   |
| Hbegf             | Gtpbp3                                   |
| Hbp2              | Gtpbp4                                   |
| Hcfc2             | Gtpbp6                                   |
| Hcn2              | Gtpbp8                                   |
| Hcn3              | Gtse1                                    |
| Hcn4              | Gtsf1l                                   |
| Hdac1             | Guca1a                                   |
| Hdac10            | Guca1b                                   |
| Hdac5             | Guca2b                                   |
| Hdc               | Gucy1a3                                  |
| Hdgfrp2           | Gucy1b3                                  |
| Hdgfrp3           | Gulo                                     |
| Hdhd3             | Gusb                                     |
| Hdlbp             | Gyg                                      |
| Heatr2            | Gyk                                      |
| Heatr5a           | Gykl1                                    |
| Heatr6            | Gylt1b                                   |
| Hectd2            | Gypa                                     |
| Helb              | Gypc                                     |
| Helt              | Gys1                                     |
| Helz              | Gzma                                     |
| Hephl1            | Gzmb                                     |
| Herc1             | Gzmd                                     |
| Herc2             | Gzme                                     |
| Herc4             | Gzmf                                     |
| Hes1              | Gzmk                                     |
| Hes7              | Gzmm                                     |
| Hexim1            | Gzmn                                     |
| Hexim2            | H13                                      |
| Hfe               | H19                                      |
| Hgd               | H1f0                                     |
| Hgfl              | H1foo                                    |
| Hhat              | H1fx                                     |
| Hhip              | H2-Aa                                    |
| Hic1              | H2-Ab1                                   |
| Hif1an            | H2-Ab1 /// LOC641240 /// Rmcs2 /// Rmcs5 |
| Higd1a            | H2-Ab1 /// Rmcs2 /// Rmcs5               |
| Higd1b            | H2-D1                                    |
| Hip1              | H2-D4                                    |
| Hipk2             | H2-DMb1///H2-DMb2                        |
| Hipk3             | H2-DMb2                                  |
| Hira              | H2-Ea                                    |
| Hist1h1a          | H2-Ea-ps                                 |
| Hist1h1c          | H2-Eb1                                   |
| Hist1h1d          | H2-Ke6                                   |
| Hist1h2ab         | H2-Ob///LOC102633400                     |
| Hist1h2ae         | H2-Q10                                   |
| Hist1h2ag         | H2-Q2                                    |
| Hist1h2ah         | H2-T10///H2-T22///H2-T9                  |
| Hist1h2ai         | H2-T24                                   |
| Hist1h2bb         | H2afj                                    |
| Hist1h2be         | H2afy2                                   |
| Hist1h2bf         | H2afy2///H2afy3                          |
| Hist1h2bg         | H2afy3                                   |
| Hist1h2bh         | H6pd                                     |
| Hist1h2bj         | Habp2                                    |
| Hist1h2bk         | Habp4                                    |
| Hist1h2bl         | Hacl1                                    |
| Hist1h2bm         | Hal                                      |
| Hist1h2bn         | Hamp2                                    |
| Hist1h3a          | Hand1                                    |
| Hist1h3b          | Hand2                                    |
| Hist1h3c          | Hapl1                                    |
| Hist1h3h          | Hapl2                                    |
| Hist1h4a          | Hapl3                                    |
| Hist1h4b          | Has1                                     |
| Hist1h4d          | Haus6                                    |
| Hist1h4f          | Haus7                                    |
| Hist1h4i          | Hax1                                     |
| Hist1h4k          | Hba-a1                                   |
| Hist1h4n          | Hba-a1///Hba-a2                          |
| Hist2h2bb         | Hba-x                                    |
| Hist2h3b          | Hbb-b1///Hbb-b2///Hbb-bs///Hbb-bt        |
| Hist2h4           | Hbb-b2                                   |
| Hist3h2a          | Hbb-bh1                                  |
| Hist3h2ba         | Hbb-y                                    |
| Hist3h2bb         | Hbs1l                                    |
| Hist4h4           | Hc                                       |
| Hivep2            | Hcar2                                    |
| Hk1               | Hcfc1                                    |
| Hk2               | Hck                                      |
| Hlf               | Hcn1                                     |
| Hm13              | Hcn2                                     |
| Hmbox1            | Hcn3                                     |
| Hmbs              | Hcst                                     |
| Hmg20a            | Hdac2                                    |
| Hmga1             | Hdac4                                    |
| Hmga2             | Hdac6                                    |
| Hmgcl             | Hdac7                                    |
| Hmox1             | Hdac9                                    |
| Hmx2              | Hdc                                      |
| Hnf1b             | Hddc2                                    |
| Hnrnpa1           | Hdgfl1                                   |
| Hnrnpa2b1         | Hdgfrp2                                  |



|          |                                                                                                                          |
|----------|--------------------------------------------------------------------------------------------------------------------------|
| Hnrnpl   | Hdgfrp3                                                                                                                  |
| Hnrpa3   | Hdhd1a                                                                                                                   |
| Hnrpab   | Hdlbp                                                                                                                    |
| Hnrpd    | Hdx                                                                                                                      |
| Hnrpdl   | Heatr1                                                                                                                   |
| Hnrpf    | Heatr2                                                                                                                   |
| Hnrph1   | Heatr5b                                                                                                                  |
| Hnrph3   | Heatr8                                                                                                                   |
| Hnrpm    | Hebp1                                                                                                                    |
| Hnrpu1   | Helb                                                                                                                     |
| Hnt      | Hells                                                                                                                    |
| Homer2   | Hemk1                                                                                                                    |
| Homez    | Heph                                                                                                                     |
| Hook2    | Herc1                                                                                                                    |
| Hormad1  | Herc2                                                                                                                    |
| Hoxa1    | Herc4                                                                                                                    |
| Hoxa10   | Herpud1                                                                                                                  |
| Hoxa11   | Herpud2                                                                                                                  |
| Hoxa2    | Hes1                                                                                                                     |
| Hoxa3    | Hes2                                                                                                                     |
| Hoxa4    | Hes3                                                                                                                     |
| Hoxa5    | Hes5                                                                                                                     |
| Hoxa9    | Hes7                                                                                                                     |
| Hoxb1    | Hesx1                                                                                                                    |
| Hoxb2    | Hexa                                                                                                                     |
| Hoxb3    | Hexdc                                                                                                                    |
| Hoxb4    | Hey1                                                                                                                     |
| Hoxb5    | Hey2                                                                                                                     |
| Hoxb6    | Heyl                                                                                                                     |
| Hoxb7    | Hfe                                                                                                                      |
| Hoxb8    | Hgf                                                                                                                      |
| Hoxb9    | Hgsnat                                                                                                                   |
| Hoxc10   | Hhex                                                                                                                     |
| Hoxc11   | Hhip                                                                                                                     |
| Hoxc4    | Hiat1                                                                                                                    |
| Hoxc5    | Hic1                                                                                                                     |
| Hoxc6    | Hic2                                                                                                                     |
| Hoxc8    | Hid1                                                                                                                     |
| Hoxc9    | Hif1a                                                                                                                    |
| Hoxd1    | Hif3a                                                                                                                    |
| Hoxd10   | Higd1b                                                                                                                   |
| Hoxd3    | Higd1c///Mettl7a1///Mettl7a2///Mettl7a2Higd1c///Mettl7a3                                                                 |
| Hoxd8    | Hint1                                                                                                                    |
| Hoxd9    | Hip1                                                                                                                     |
| Hpca     | Hip1r                                                                                                                    |
| Hrbl     | Hipk1                                                                                                                    |
| Hrh1     | Hipk2                                                                                                                    |
| Hrk      | Hipk3                                                                                                                    |
| Hrsp12   | Hira                                                                                                                     |
| Hs2st1   | Hist1h1c                                                                                                                 |
| Hs3st1   | Hist1h1e                                                                                                                 |
| Hs3st3b1 | Hist1h1t                                                                                                                 |
| Hs3st5   | Hist1h2ab /// Hist1h2ac /// Hist1h2ad /// Hist1h2ae /// Hist1h2ag /// Hist1h2ai /// Hist1h2an /// Hist1h2ao /// RP23-    |
| Hsd17b1  | Hist1h2bb /// Hist1h2bc /// Hist1h2be /// Hist1h2bf /// Hist1h2bg /// Hist1h2bj /// Hist1h2bl /// Hist1h2bm /// Hist1    |
| Hsd17b4  | Hist1h2bc///Hist1h2be///Hist1h2bf///Hist1h2bg///Hist1h2bj///Hist1h2bl///Hist1h2bm///Hist1h2bn///Hist1h2bp///H-           |
| Hsd12    | Hist1h3a///Hist1h3b///Hist1h3c///Hist1h3d///Hist1h3e///Hist1h3f///Hist1h3g///Hist1h3h///Hist1h3i///Hist2h3b///H-         |
| Hsf2bp   | Hist1h3b///Hist1h3c///Hist1h3d///Hist1h3e///Hist1h3f///Hist2h3b///Hist2h3c1///Hist2h3c2                                  |
| Hsf5     | Hist1h3f                                                                                                                 |
| Hsp90ab1 | Hist1h4a /// Hist1h4b /// Hist1h4c /// Hist1h4d /// Hist1h4f /// Hist1h4h /// Hist1h4i /// Hist1h4j /// Hist1h4k /// Hsi |
| Hsp90b1  | Hist1h4a///Hist1h4b///Hist1h4c///Hist1h4d///Hist1h4f///Hist1h4h///Hist1h4i///Hist1h4j///Hist1h4k///Hist1h4m///H-         |
| Hspa1a   | Hist2h2aa2                                                                                                               |
| Hspa2    | Hist3h2ba///Hist3h2bb-ps                                                                                                 |
| Hspa4    | Hk1                                                                                                                      |
| Hspa5    | Hlf                                                                                                                      |
| Hspa8    | Hlx                                                                                                                      |
| Hspa9    | Hmbs                                                                                                                     |
| Hspb6    | Hmcn1                                                                                                                    |
| Hspb7    | Hmg20a                                                                                                                   |
| Hspb8    | Hmga1 /// Hmga1-rs1                                                                                                      |
| Hspbap1  | Hmga2                                                                                                                    |
| Hspbpb1  | Hmga2-ps1                                                                                                                |
| Hspc171  | Hmgcl                                                                                                                    |
| Hspd1    | Hmgcll1                                                                                                                  |
| Hspe1    | Hmgcr                                                                                                                    |
| Hspg2    | Hmgcs2                                                                                                                   |
| Htr6     | Hmgn3                                                                                                                    |
| HtrA2    | Hmmr                                                                                                                     |
| Htra2    | Hmox1                                                                                                                    |
| Hunk     | Hmox2                                                                                                                    |
| Hus1b    | Hmx1                                                                                                                     |
| Hyal1    | Hn1                                                                                                                      |
| Hyal2    | Hnf1a                                                                                                                    |
| Hyal3    | Hnf4a                                                                                                                    |
| Hyou1    | Hnf4g                                                                                                                    |
| ICAM1    | Hnmt                                                                                                                     |
| ID2      | Hnrnpa1                                                                                                                  |
| ID3      | Hnrnpa2b1                                                                                                                |
| IFI16    | Hnrnpab                                                                                                                  |
| IFIT2    | Hnrnpc                                                                                                                   |
| IFITM1   | Hnrnph1                                                                                                                  |
| IFITM2   | Hnrnph3                                                                                                                  |
| IFNGR1   | Hnrnpl                                                                                                                   |
| IGFN1    | Hnrnpu                                                                                                                   |
| IGHG3    | Hoga1                                                                                                                    |
| IGJ      | Homer1                                                                                                                   |
| IGKC     | Homer3                                                                                                                   |
| IGLC2    | Hook2                                                                                                                    |
| IGLL1    | Hopx                                                                                                                     |
| IKZF1    | Hormad1                                                                                                                  |
| IL10     | Hoxa10                                                                                                                   |
| IL13RA2  | Hoxa11os                                                                                                                 |
| IL16     | Hoxa2                                                                                                                    |
| IL28A    | Hoxa9                                                                                                                    |
| IL8      | Hoxb7///Hoxb8                                                                                                            |
| ILF2     | Hoxb9                                                                                                                    |
| INHBC    | Hoxc13                                                                                                                   |
| INPP5D   | Hoxc4                                                                                                                    |
| INPPL1   | Hoxc5                                                                                                                    |
| INTS8    | Hoxc6                                                                                                                    |
| IRF3     | Hoxc8                                                                                                                    |
| IRF8     | Hoxc9                                                                                                                    |
| ISG15    | Hoxd1                                                                                                                    |
| ISG20    | Hoxd10                                                                                                                   |
| ITGAL    | Hoxd12                                                                                                                   |
| ITGB7    | Hoxd13                                                                                                                   |
| IVNS1ABP | Hoxd3                                                                                                                    |
| Iars2    | Hoxd3///Hoxd4                                                                                                            |
| Ibrdc3   | Hoxd8                                                                                                                    |
| Ibtk     | Hoxd9                                                                                                                    |
| Icam1    | Hp                                                                                                                       |
| Icam2    | Hpd                                                                                                                      |
| Icam4    | Hpgd                                                                                                                     |
| Icam5    | Hpgds                                                                                                                    |
| Ick      | Hpn                                                                                                                      |
| Icosl    | Hps1                                                                                                                     |
| Id1      | Hpvc-ps                                                                                                                  |
| Id2      | Hpx                                                                                                                      |
| Id3      | Hrasls                                                                                                                   |
| Id4      | Hrg                                                                                                                      |
| Idh3b    | Hrh1                                                                                                                     |
| Idi1     | Hrh2                                                                                                                     |
| Ier2     | Hrh4                                                                                                                     |
| Ier5     | Hrrr                                                                                                                     |
| Ier5l    | Hs1bp3                                                                                                                   |
| Ifi35    | Hs2st1                                                                                                                   |
| Ifih1    | Hs3st1                                                                                                                   |
| Ifit1    | Hs3st3a1                                                                                                                 |
| Ifna13   | Hs3st3b1                                                                                                                 |
| Ifrd2    | Hs6st2                                                                                                                   |
| Ifrg15   | Hs6st3                                                                                                                   |
| Ift122   | Hsbp1                                                                                                                    |
| Ift74    | Hsd11b1                                                                                                                  |
| Ift81    | Hsd11b2                                                                                                                  |
| Igf1r    | Hsd17b1                                                                                                                  |
| Igf2     | Hsd17b10                                                                                                                 |
| Igf2bp1  | Hsd17b11                                                                                                                 |
| Igf2bp2  | Hsd17b3                                                                                                                  |
| Igf2bp3  | Hsd17b6                                                                                                                  |
| Igfbp4   | Hsd17b7                                                                                                                  |

|           |                                                                          |
|-----------|--------------------------------------------------------------------------|
| Ighv6-6   | Hsd3b1                                                                   |
| Igkv1-135 | Hsd3b2                                                                   |
| Igkv10-95 | Hsd3b3                                                                   |
| Igkv2-112 | Hsf2                                                                     |
| Igl1      | Hsf4                                                                     |
| Igsf8     | Hsp90b1                                                                  |
| Ihpk1     | Hspa12b                                                                  |
| Ik        | Hspa1l                                                                   |
| Ikzf2     | Hspa4                                                                    |
| Ikzf4     | Hspa4l                                                                   |
| Il11      | Hspa5                                                                    |
| Il15ra    | Hspa8                                                                    |
| Il17a     | Hspa9                                                                    |
| Il17re    | Hspb1                                                                    |
| Il18bp    | Hspb11                                                                   |
| Il1r1     | Hspb6                                                                    |
| Il1rap    | Hspb7                                                                    |
| Il25      | Hspe1-ps2///Hspe1-ps2                                                    |
| Il2ra     | Hspg2                                                                    |
| Il33      | Hsph1                                                                    |
| Il4i1     | Htatsf1                                                                  |
| Il6ra     | Htr1a                                                                    |
| Ilf2      | Htr1b                                                                    |
| Ilf3      | Htr1f                                                                    |
| Imp3      | Htr2b                                                                    |
| Impa2     | Htr3a                                                                    |
| Impdh1    | Htr3b                                                                    |
| Impdh2    | Htr4                                                                     |
| Ing2      | Htr5a                                                                    |
| Inhba     | Htr6                                                                     |
| Ino80     | Htr7                                                                     |
| Inoc1     | Htra1                                                                    |
| Inpp1     | Htra2                                                                    |
| Inpp4a    | Htra3                                                                    |
| Inpp5a    | Hus1                                                                     |
| Inpp1     | Huwe1                                                                    |
| Insc      | Hvcn1                                                                    |
| Insl3     | Hyou1                                                                    |
| Insm1     | Hypm                                                                     |
| Ints2     | I54                                                                      |
| Ints6     | Iapp                                                                     |
| Invs      | Ibsp                                                                     |
| Ip6k1     | Ibtk                                                                     |
| Ipo8      | Ica1                                                                     |
| Ipp       | Icam2                                                                    |
| Iqcb1     | Icam4                                                                    |
| Iqcc      | Icam5                                                                    |
| Iqce      | Ick                                                                      |
| Iqcg      | Icos                                                                     |
| Iqgap1    | Icosl                                                                    |
| Iqgap2    | Ict1                                                                     |
| Iqsec1    | Id2                                                                      |
| Iqwd1     | Ide                                                                      |
| Irak2     | Idh2                                                                     |
| Irf1      | Idh3g                                                                    |
| Irf6      | Idi1                                                                     |
| Irf8      | Ido1                                                                     |
| Irgm2     | Ido2                                                                     |
| Irs1      | Ids                                                                      |
| Irx4      | Idua                                                                     |
| Isg2011   | Ier5                                                                     |
| Isgf3g    | Ier5l                                                                    |
| Isl1      | Iffo1                                                                    |
| Isl2      | Iffo2                                                                    |
| Isoc2b    | Ifi202b                                                                  |
| Itfg2     | Ifi204                                                                   |
| Itga10    | Ifi204///Ifi205///Mnda///Mndal                                           |
| Itga2     | Ifi205///Mnda                                                            |
| Itga3     | Ifi2712b                                                                 |
| Itga6     | Ifi35                                                                    |
| Itgav     | Ifi44                                                                    |
| Itgb1     | Ifi44l                                                                   |
| Itgb5     | Ifi47                                                                    |
| Itgb7     | Ifih1                                                                    |
| Itgb8     | Ifit2                                                                    |
| Itih5l-ps | Ifitm1                                                                   |
| Itm2c     | Ifitm2                                                                   |
| Itpk1     | Ifitm3                                                                   |
| Itpka     | Ifna1                                                                    |
| Itpkb     | Ifna1///Ifna12///Ifna15///Ifna16///Ifna5///Ifna6///Ifna7///Ifna9///Ifnab |
| Itpr1     | Ifna11                                                                   |
| Itpr2     | Ifna15///Ifna6///Ifnab                                                   |
| Itpr3     | Ifna2                                                                    |
| Ivns1abp  | Ifna4                                                                    |
| J5AP2     | Ifna5                                                                    |
| Jag1      | Ifnab                                                                    |
| Jagn1     | Ifnar1                                                                   |
| Jak2      | Ifnar2                                                                   |
| Jak3      | Ifnb1                                                                    |
| Jam3      | Ifng                                                                     |
| Jarid1a   | Ifngr2                                                                   |
| Jarid1c   | Ifnz                                                                     |
| Jazf1     | Ifrd2                                                                    |
| Jmjd1a    | Ift122                                                                   |
| Jmjd1b    | Ift20                                                                    |
| Jmjd2c    | Ift22                                                                    |
| Jmjd3     | Ift27                                                                    |
| Jmjd4     | Ift57                                                                    |
| Jmjd6     | Ift74                                                                    |
| Jmy       | Ift80                                                                    |
| Jnk2      | Ift81                                                                    |
| Jph1      | Igbp1b                                                                   |
| Jph3      | Igdcc3                                                                   |
| Jph4      | Igdcc4                                                                   |
| Jtb       | Igf1                                                                     |
| Jub       | Igf1os                                                                   |
| Junb      | Igf1r                                                                    |
| Jund1     | Igf2                                                                     |
| Jundm2    | Igf2bp1                                                                  |
| Jup       | Igf2bp2                                                                  |
| KBTBD4    | Igf2bp3                                                                  |
| KCNH8     | Igf2os                                                                   |
| KCNQ1     | Igf2r                                                                    |
| KIAA1680  | Igfals                                                                   |
| KIAA1712  | Igfbp3                                                                   |
| KIF18A    | Igfbp4                                                                   |
| KLF10     | Igfbp5                                                                   |
| KLHDC9    | Igfbp6                                                                   |
| KPNB1     | Igfbp7                                                                   |
| KRT10     | Igfbp11                                                                  |
| KRT85     | Igh-VJ558                                                                |
| Kalrn     | Igh-VJ558///Igha                                                         |
| Kars      | Igh-VJ558///Ighg///Ighm                                                  |
| Kat2b-ps  | Ighg                                                                     |
| Kbtbd12   | Ighm                                                                     |
| Kcna1     | Ighmbp2                                                                  |
| Kcna7     | Ighv14-2                                                                 |
| Kcna1     | Igj                                                                      |
| Kcnd2     | Igk                                                                      |
| Kcng4     | Igk-V1///Igkv9-120                                                       |
| Kcnh2     | Igk-V28                                                                  |
| Kcnh3     | Igk-V28///Igkc///Igj1///Igkv4-53///Igkv6-23///Igkv8-30                   |
| Kcnh8     | Igk-V28///Igkv6-14///Igkv6-23///Igkv8-19                                 |
| Kcnip1    | Igkv1-117                                                                |
| Kcnip3    | Igkv19-93                                                                |
| Kcnj1     | Igkv4-72                                                                 |
| Kcnj2     | Igkv4-73///Igkv4-81                                                      |
| Kcnj4     | Igkv5-39                                                                 |
| Kcnj8     | Igkv6-15                                                                 |
| Kcnk1     | Igkv8-30                                                                 |
| Kcnma1    | Iglc1///Iglv1                                                            |
| Kcnn1     | Igl1                                                                     |
| Kcnn2     | Iglv1                                                                    |
| Kcnq4     | Igsf1                                                                    |
| Kcns3     | Igsf10                                                                   |
| Kctd11    | Igsf8                                                                    |
| Kctd17    | Igtp                                                                     |
| Kctd2     | Igtp1                                                                    |
| Kctd20    | Igtp1b                                                                   |

|           |                     |
|-----------|---------------------|
| Kdelc1    | lkbip               |
| Kdelc2    | lkbkap              |
| Kdelr1    | lkbkb               |
| Kdelr3    | lkbke               |
| Kdm2b     | lkbkg               |
| Kdm3a     | lkzf1               |
| Kdm5a     | lkzf2               |
| Kdm6b     | lkzf3               |
| Keap1     | lkzf4               |
| Khdrbs1   | ll10                |
| Khk       | ll10ra              |
| Khsrp     | ll11                |
| Kiaa0286  | ll12a               |
| Kiaa1815  | ll12b               |
| Kif11     | ll13                |
| Kif13a    | ll13ra2             |
| Kif17     | ll15ra              |
| Kif1b     | ll16                |
| Kif1c     | ll17a               |
| Kif20a    | ll17b               |
| Kif23     | ll17d               |
| Kif24     | ll17ra              |
| Kif26a    | ll17rd              |
| Kif2a     | ll17re              |
| Kif5c     | ll18                |
| Kif9      | ll18bp              |
| Kifc1     | ll18r1              |
| Kifc2     | ll1b                |
| Kirrel    | ll1f10              |
| Kiss1r    | ll1f5               |
| Klc1      | ll1f9               |
| Klf3      | ll1r1               |
| Klf5      | ll1r2               |
| Klf7      | ll1rap              |
| Klf9      | ll1rapl1            |
| Klhdc3    | ll1rapl2            |
| Klhdc5    | ll1r11              |
| Klhdc8b   | ll1r12              |
| Klh118    | ll1rn               |
| Klh120    | ll21                |
| Klh121    | ll21r               |
| Klh123    | ll22///lltifb       |
| Klh125    | ll23a               |
| Klh126    | ll24                |
| Klh15     | ll25                |
| Klrb1b    | ll27ra              |
| Klrb1c    | ll2ra               |
| Klrb1d    | ll2rb               |
| Klrb1f    | ll2rg               |
| Klrg2     | ll3ra               |
| Kntc1     | ll4                 |
| Kpna4     | ll4i1///Nup62-ii4i1 |
| Kpnb1     | ll5ra               |
| Kras      | ll6                 |
| Kremen1   | ll6ra               |
| Krt10     | ll6st               |
| Krt15     | ll7                 |
| Krt18     | ll7r                |
| Krt20     | llf2                |
| Krt28     | llf3                |
| Krt8      | llk                 |
| Krtap20-2 | Image:619641        |
| Krtap5-5  | lmp1                |
| Krtcap2   | lmp4                |
| Ksr1      | lmpa1               |
| Ksr2      | lmpact              |
| L3mbtl3   | lmpad1              |
| LCK       | lmpg1               |
| LDB1      | lna                 |
| LDHA      | lnca1               |
| LGALS1    | lncenp              |
| LGMN      | lng3                |
| LINS1     | lng4                |
| LMCD1     | lnha                |
| LMO2      | lnhba               |
| LOC436177 | lnhbb               |
| LOC545291 | lnhbe               |
| LOC574418 | lnmt                |
| LOC622404 | lno80               |
| LOC644974 | lno80b              |
| LRMP      | lno80e              |
| LRRC41    | lnpp1               |
| LYN       | lnpp4a              |
| LYRM7     | lnpp5a              |
| LYSMD1    | lnpp5b              |
| LYSMD4    | lnpp5e              |
| Lag3      | lnpp5k              |
| Lama3B    | lms1                |
| Lamb2     | lnsl6               |
| Lamc1     | lnsr                |
| Lamc3     | lnsrr               |
| Lamp1     | lnts5               |
| Lamr1-ps1 | lnts6               |
| Lancl2    | lnts8               |
| Lap1B     | lnvs                |
| Laptm4a   | lp6k1               |
| Laptm5    | lpo4                |
| Large     | lpo4///Tm9sf1       |
| Larp4     | lpo5                |
| Larp7     | lpo8                |
| Lars      | lpo9                |
| Las1      | lqcb1               |
| Lasp1     | lqcf3               |
| Lass2     | lqgap1              |
| Lat2      | lqgap2              |
| Lats1     | lqsec1              |
| Lats2     | lrak1               |
| Lba       | lrak1bp1            |
| Lba1      | lrak4               |
| Lbr       | lrf1                |
| Lbx2      | lrf3                |
| Lbxcor1   | lrf4                |
| Lca5      | lrf6                |
| Lca5l     | lrf8                |
| Lcat      | lrgm1               |
| Lck       | lrs2                |
| Lclat1    | lrs3                |
| Lcn14     | lrs4                |
| Lcor      | lrx1                |
| Lct       | lrx4                |
| Ldb1      | lrx6                |
| Ldhb      | lscu                |
| Ldlrad2   | lsg20               |
| Ldlrap1   | lsl1                |
| Lef1      | lslr                |
| Lefty2    | lsoc2b              |
| Lemd1     | lsyna1              |
| Lemd2     | ltch                |
| Lenep     | ltga2               |
| Leo1      | ltga2b              |
| Leprel2   | ltga4               |
| Leprotl1  | ltga5               |
| Lfng      | ltga7               |
| Lgals1    | ltga8               |
| Lgals2    | ltga9               |
| Lgals4    | ltgal               |
| Lgr4      | ltgam               |
| Lgr5      | ltgav               |
| Lgtm      | ltgax               |
| Lhb       | ltgb1               |
| Lhfp      | ltgb1bp1            |
| Lhfp12    | ltgb1bp2            |
| Lhx1      | ltgb2               |
| Lhx2      | ltgb3bp             |
| Lhx4      | ltgb4               |
| Lhx5      | ltgb5               |
| Lhx8      | ltgb1               |
| Lif       | ltih2               |
| Lig3      | ltih3               |

|               |                  |
|---------------|------------------|
| Lim2          | Itih4            |
| Lima1         | Itih5            |
| Limch1        | Itk              |
| Limd1         | Itm2a            |
| Lime1         | Itm2c            |
| Limk1         | Itpr1            |
| Lin28         | Itpr2            |
| Lin37         | Its1             |
| Lin52         | Ivd              |
| Lin54         | Iyd              |
| Lipg          | Izumo4           |
| Lipt1         | JAM2             |
| Ligl1         | Jade1            |
| Ligl2         | Jag1             |
| Lman1         | Jak1             |
| Lman2         | Jak2             |
| Lmbr1l        | Jam2             |
| Lmln          | Jam3             |
| Lmna          | Jarid2           |
| Lmnb2         | Jdp2             |
| Lmo4          | Jhdm1d           |
| Lmo7          | Jkamp            |
| Lmtk3         | Jmjd1c           |
| Lnpep         | Jmjd6            |
| Lnv           | Jmy              |
| Lnx2          | Josd2            |
| Loh12cr1      | Jph2             |
| Loxl3         | Jph3             |
| Lpcat3        | Junb             |
| Lpgat1        | Kalrn            |
| Lphn2         | Kank2            |
| Lpin3         | Kank3            |
| Lpxn          | Kans1            |
| Lrba          | Kans1l           |
| Lrch1         | Kansl2           |
| Lrfn1         | Kap              |
| Lrig1         | Kat2a            |
| Lrig2         | Kat2b            |
| Lrig3         | Kat6b            |
| Lrp1          | Kat7             |
| Lrp10         | Kazn             |
| Lrp1b         | Kbtbd10          |
| Lrp4          | Kbtbd11          |
| Lrp8          | Kcna3            |
| Lrrc16a       | Kcna4            |
| Lrrc20        | Kcna5            |
| Lrrc23        | Kcna7            |
| Lrrc25        | Kcnab1           |
| Lrrc27        | Kcnab2           |
| Lrrc28        | Kcnab3           |
| Lrrc29        | Kcnb1            |
| Lrrc3b        | Kcnb1///Pacsin2  |
| Lrrc41        | Kcnc1            |
| Lrrc45        | Kcnc3            |
| Lrrc46        | Kcnc4            |
| Lrrc4b        | Kcnd1            |
| Lrrc4c        | Kcnd2            |
| Lrrc59        | Kcnd3            |
| Lrrc6         | Kcne1l           |
| Lrrc61        | Kcne2            |
| Lrrc66        | Kcne3            |
| Lrrc8b        | Kcne4            |
| Lrrc8e        | Kcnh2            |
| Lrrk2         | Kcnh3            |
| Lrrn1         | Kcnh7            |
| Lrrtm1        | Kcni1            |
| Lrrtm3        | Kcni2            |
| Lrsam1        | Kcni4            |
| Lsamp         | Kcnj1            |
| Lsg1          | Kcnj10           |
| Lsm11         | Kcnj11           |
| Lsm2          | Kcnj12           |
| Lsm3          | Kcnj14           |
| Lsr           | Kcnj2            |
| Lss           | Kcnj3            |
| Lta4h         | Kcnj5            |
| Ltb4r1        | Kcnj6            |
| Ltbp-3        | Kcnj8            |
| Ltbp2         | Kcnj9            |
| Ltbp3         | Kcnk1            |
| Ltbp4         | Kcnk10           |
| Ltbr          | Kcnk13           |
| Ltv1          | Kcnk3            |
| Luc7l2        | Kcnk5            |
| Ly6a          | Kcnma1           |
| Ly6g6c        | Kcnmb1           |
| Lyn           | Kcnmb2           |
| Lypla2        | Kcnmb4           |
| Lym1          | Kcnn1            |
| Lym2          | Kcnn2            |
| Lym5          | Kcnn3            |
| Lyst2         | Kcnn4            |
| Lzts1         | Kcnq1            |
| M-rdgB beta   | Kcnq2            |
| M6pr          | Kcnq3            |
| M6prbp1       | Kcnq4            |
| MAGEA1        | Kcns1            |
| MAGI2         | Kcns2            |
| MAN1C1        | Kctd1            |
| MAP2K1        | Kctd12///Mir5130 |
| MAP3K11       | Kctd12b          |
| MARK2         | Kctd14           |
| MCFD2         | Kctd17           |
| MCM4          | Kdelc1           |
| MCM7          | Kdelr2           |
| MCM7///MCM2   | Kdelr3           |
| MEIS1         | Kdf1             |
| MFAP4         | Kdm1b            |
| MGAT2         | Kdm5b            |
| MGLL          | Kdm5c            |
| MGST2         | Kdm5d            |
| MINK          | Kdm6a            |
| MKK7          | Kdm7a            |
| MKP-7         | Kdm8             |
| MMP1          | Kdr              |
| MMP2          | Keap1            |
| MOK           | Kel              |
| MORN2         | Kera             |
| MORN4         | Khdc1b           |
| MRPL4         | Khdrbs1          |
| MRPS23        | Khdrbs2          |
| MS4A2///MS4A1 | Khdrbs3          |
| MSP58         | Kif11            |
| MTHFD2        | Kif12            |
| MTHFS         | Kif13a           |
| MTMR11        | Kif13b           |
| MVP           | Kif17            |
| MYBL1         | Kif1a            |
| MYBL2         | Kif1b            |
| MYC           | Kif1c            |
| MYL6          | Kif22            |
| MYO1B         | Kif26b           |
| MYO1E         | Kif2a            |
| Mab21l2       | Kif2c            |
| Macf          | Kif3a            |
| Macf1         | Kif3b            |
| Macrocl1      | Kif5a            |
| Mad1          | Kif5c            |
| Mad1l1        | Kifap3           |
| Mad2l2        | Kifc2            |
| Madd          | Kifc3            |
| Maff          | Kifc5b           |
| Mageb18       | Kiss1r           |
| Mageb3        | Kit              |
| Magj1         | Kitl             |
| Magj3         | Kl               |
| Magmas        | Klb              |
| Magoh         | Klc1             |
| Magohb        | Klc3             |

|           |                                                             |
|-----------|-------------------------------------------------------------|
| Mam13     | Klf1                                                        |
| Man1a     | Klf12                                                       |
| Man2a1    | Klf13                                                       |
| Man2c1    | Klf14                                                       |
| Manbal    | Klf17                                                       |
| Map2k1    | Klf7                                                        |
| Map2k7    | Klf9                                                        |
| Map3k1    | Klhdc2                                                      |
| Map3k10   | Klh10                                                       |
| Map3k11   | Klh11                                                       |
| Map3k14   | Klh13                                                       |
| Map3k3    | Klh14                                                       |
| Map3k7    | Klh20                                                       |
| Map4k1    | Klh22                                                       |
| Map4k3    | Klh24                                                       |
| Map4k4    | Klh25                                                       |
| Mapk1     | Klh36                                                       |
| Mapk12    | Klh42                                                       |
| Mapk14    | Klh5                                                        |
| Mapk1ip11 | Klh7                                                        |
| Mapk3     | Klk1                                                        |
| Mapk4     | Klk11                                                       |
| Mapk7     | Klk1b1                                                      |
| Mapk8ip2  | Klk1b11                                                     |
| Mapk9     | Klk1b16                                                     |
| Mapkap1   | Klk1b21                                                     |
| Mapkapk3  | Klk1b22///Klk1b9                                            |
| Mapre2    | Klk1b4                                                      |
| Mapt      | Klk1b5                                                      |
|           | Mar-02 Klk1b8                                               |
|           | Mar-04 Klk4                                                 |
|           | Mar-06 Klk6                                                 |
|           | Mar-07 Klk7                                                 |
|           | Mar-08 Klkb1                                                |
|           | Mar-09 Klra1                                                |
| Marcks    | Klra1///Klra22                                              |
| Marcksl1  | Klra12                                                      |
| Mark2     | Klra15                                                      |
| Mark4     | Klra16                                                      |
| Marveld1  | Klra18                                                      |
| Mast1     | Klra2                                                       |
| Mast2     | Klra21                                                      |
| Mast4     | Klra21///Klra8                                              |
| Mastl     | Klra7                                                       |
| Mat1a     | Klrb1b                                                      |
| Mat2a     | Klrb1b///Klrb1c                                             |
| Matr3     | Klrc1                                                       |
| Max       | Klrc2                                                       |
| Mbc2      | Klrc2///Klrc3                                               |
| Mbd3      | Klrc3                                                       |
| Mbd4      | Klrk1                                                       |
| Mbd5      | Kmt2d                                                       |
| Mbd6      | Kng1                                                        |
| Mbip      | Knop1                                                       |
| Mboat5    | Knstrn                                                      |
| Mcam      | Kpna1                                                       |
| Mcart1    | Kpna4                                                       |
| Mcee      | Kpna6                                                       |
| Mcf2l     | Kpnb1                                                       |
| Mcfd2     | Kras                                                        |
| Mcl1      | Kremen1                                                     |
| Mcm3      | Krr1                                                        |
| Mcm3ap    | Krt1                                                        |
| Mcm5      | Krt10                                                       |
| Mcm8      | Krt12                                                       |
| Mcm9      | Krt13                                                       |
| Mcoln2    | Krt14                                                       |
| Mcoln3    | Krt15                                                       |
| Mcrs1     | Krt16                                                       |
| Mctp1     | Krt17                                                       |
| Mcts1     | Krt19                                                       |
| Mcts2     | Krt20                                                       |
| Mds1      | Krt23                                                       |
| Me1       | Krt25                                                       |
| Med1      | Krt26                                                       |
| Med12     | Krt27                                                       |
| Med12l    | Krt28                                                       |
| Med13     | Krt33b                                                      |
| Med13l    | Krt35                                                       |
| Med16     | Krt36                                                       |
| Med18     | Krt5                                                        |
| Med20     | Krt6a                                                       |
| Med21     | Krt71                                                       |
| Med24     | Krt72                                                       |
| Med28     | Krt73                                                       |
| Med29     | Krt75                                                       |
| Med31     | Krt77                                                       |
| Med8      | Krt79                                                       |
| Mef2b     | Krt8                                                        |
| Mef2d     | Krt84                                                       |
| Megf10    | Krt85 /// LOC100044179                                      |
| Megf11    | Krtap1-5                                                    |
| Megf8     | Krtap12-1                                                   |
| Meis2     | Krtap13                                                     |
| Meis3     | Krtap13-1                                                   |
| Mel13     | Krtap15                                                     |
| Mepce     | Krtap16-1                                                   |
| Mesdc1    | Krtap16-3                                                   |
| Mesdc2    | Krtap17-1                                                   |
| Met       | Krtap19-1                                                   |
| Metap2    | Krtap19-3                                                   |
| Mett11d1  | Krtap19-4                                                   |
| Mettl1    | Krtap19-5                                                   |
| Mettl3    | Krtap19-9b                                                  |
| Mettl5    | Krtap21-1                                                   |
| Mettl6    | Krtap28-13                                                  |
| Mettl8    | Krtap3-2 /// Krtap3-3                                       |
| Mex3d     | Krtap3-2///Krtap3-3                                         |
| Mfap1a    | Krtap4-2                                                    |
| Mfi2      | Krtap5-1                                                    |
| Mfng      | Krtap5-2                                                    |
| Mfsd11    | Krtap5-4                                                    |
| Mga       | Krtap6-2                                                    |
| Mgat4b    | Krtap6-3                                                    |
| Mgat5     | Krtap6-5                                                    |
| Mgat5b    | Krtap8-1                                                    |
| Mgrn1     | Krtap9-3                                                    |
| Mib1      | Krtcap2                                                     |
| Mical2    | Krtdap                                                      |
| Micall1   | Ksr1                                                        |
| Mid1      | Kti12                                                       |
| Midn      | Ky                                                          |
| Mier3     | Kynu                                                        |
| Mif1      | L1cam                                                       |
| Mink1     | L3hypdh                                                     |
| Minpp1    | LEPR                                                        |
| Mir10a    | LOC100038947 /// LOC668101 /// Sirpb1                       |
| Mir140    | LOC100040358 /// Zfp521                                     |
| Mir194-1  | LOC100041195 /// LOC100041874 /// LOC666442                 |
| Mir3105   | LOC100043315                                                |
| Mir3968   | LOC100044094 /// LOC100044314 /// Xlr3a /// Xlr3b /// Xlr3c |
| Mir7-2    | LOC100044106 /// Plxnc1                                     |
| Mir760    | LOC100044139 /// Snrpn /// Snurf                            |
| Mir802    | LOC100044234 /// Nptx2                                      |
| Mir804    | LOC100045677 /// Mcm3                                       |
| Mitf      | LOC100047619 /// Slc7a5                                     |
| Mki67     | LOC100047803 /// Ntsr1                                      |
| Mkl1      | LOC100049077                                                |
| Mknk2     | LOC100653389                                                |
| Mlf2      | LOC100862468///Nhp2l1                                       |
| Mlh1      | LOC101055731///LOC101055745///Sytl3                         |
| Mlkl      | LOC101055763                                                |
| Mll1      | LOC101055909///Sec61b                                       |
| Mll3      | LOC102631817                                                |
| Mllt10    | LOC102632747                                                |
| Mllt11    | LOC102633540                                                |
| Mllt6     | LOC102633720                                                |
| Mllt7     | LOC102636151                                                |
| Mlstd2    | LOC102638039                                                |

|            |                                    |
|------------|------------------------------------|
| Mlx        | LOC102638292                       |
| Mlxip1     | LOC102638854                       |
| MmKIF17    | LOC102640192                       |
| Mmachc     | LOC102640359                       |
| Mmd        | LOC102640476///Rnf2                |
| Mme        | LOC102641289///Tbc1d14             |
| Mmp16      | LOC102641785///Tcf20               |
| Mmp28      | LOC102641923///Srsf1               |
| Mms19      | LOC102641972///Ptprj               |
| Mnat1      | LOC102642017///Uap1                |
| Mnk2       | LOC102642893///Scd3                |
| Mns1       | LOC102643023///Mfap1a///Mfap1b     |
| Mnt        | LOC102643033                       |
| Moap1      | LOC102643054                       |
| Mob1b      | LOC102643254///Rps6///Rps6-ps4     |
| Mob2       | LOC171588                          |
| Mob3b      | LOC269472                          |
| Mobkl2b    | LOC381765 /// LOC665506 /// Tcrb-J |
| Mog        | LOC493582                          |
| Mosc2      | LOC545261                          |
| Mov10      | LOC552901                          |
| Moxd1      | LOC631639 /// Lonrf1               |
| Mpdu1      | LOC633966                          |
| Mphosph9   | LOC640441 /// Thbs1                |
| Mpi        | LOC665506                          |
| Mpp2       | LOC666466 /// Obox2                |
| Mpp5       | LOC671878 /// Sms                  |
| Mpp6       | LOC677224                          |
| Mpped2     | LOC677224 /// Ubash3b              |
| Mpst       | Lactb2                             |
| Mpzl2      | Lad1                               |
| Mpzl3      | Lag3                               |
| Mr1        | Lair1                              |
| Mrc1       | Lalba                              |
| Mrc2       | Lama1                              |
| Mrc1       | Lama2                              |
| Mre11a     | Lama3                              |
| Mrg1       | Lama4                              |
| Mrg2       | Lama5                              |
| Mro        | Lamb1                              |
| Mrp63      | Lamb2                              |
| Mrpl10     | Lamb3                              |
| Mrpl14     | Lamc1                              |
| Mrpl17     | Lamc2                              |
| Mrpl18     | Lamc3                              |
| Mrpl20     | Lamtora1                           |
| Mrpl27     | Lamtora5                           |
| Mrpl34     | Lanc12                             |
| Mrpl4      | Lanc13                             |
| Mrpl40     | Lao1                               |
| Mrpl45     | Laptm4a                            |
| Mrpl48     | Laptm5                             |
| Mrpl51     | Larp6                              |
| Mrpl52     | Lasp1                              |
| Mrpl53     | Lat2                               |
| Mrps21     | Lats2                              |
| Mrps23     | Lats2///Xpo4                       |
| Mrps27     | Lbh                                |
| Mrps28     | Lbh /// LOC100048380               |
| Mrps33     | Lbp                                |
| Mrv1       | Lbx1                               |
| Ms4a12     | Lbx2                               |
| Msh2       | Lcat                               |
| Msh5       | Lce1a1                             |
| Msi1       | Lce1a2                             |
| Msi2       | Lce1d                              |
| Msi2       | Lce1f                              |
| Msra       | Lce1g                              |
| Msr3b      | Lce1h                              |
| Msx1       | Lce1i                              |
| Msx3       | Lcn2                               |
| Msy2       | Lcn3                               |
| Mt1        | Lcn4                               |
| Mt2        | Lcp1                               |
| MtPolB     | Lcp2                               |
| Mta2       | Lct                                |
| Mta3       | Ldb1                               |
| Mtap1a     | Ldb2                               |
| Mtap1b     | Ldb3                               |
| Mtap4      | Ldhd                               |
| Mtap7d1    | Ldhd                               |
| Mtap9      | Ldlr                               |
| Mtbp       | Ldlrad4                            |
| Mtch2      | Ldoc1l                             |
| Mtdh       | Leap2                              |
| Mtf2       | Lect1                              |
| Mthfsd     | Lef1                               |
| Mtmr12     | Lefty1                             |
| Mtmr2      | Leng8                              |
| Mtmr4      | Lep                                |
| Mtpn       | Lepre1                             |
| Mtss1      | Lepre1                             |
| Mttp       | Leprel2                            |
| Mtvr2      | Leprel4                            |
| Mtx1       | Leprotl1                           |
| MuORC4     | Letm1                              |
| Muc1       | Letm2                              |
| Muc4       | Lfng                               |
| Mus81      | Lgals1                             |
| Mvp        | Lgals12                            |
| Mxi1       | Lgals2                             |
| Mybpc2     | Lgals3bp                           |
| Myc        | Lgals7                             |
| Mycbpap    | Lgalsl                             |
| Mycn       | Lgi1                               |
| Myd116     | Lgr5                               |
| Myh9       | Lgr6                               |
| Myl4       | Lhcgr                              |
| Myl6       | Lhfp12                             |
| Myl6b      | Lhfp13                             |
| Mylc2b     | Lhpp                               |
| Mylpf      | Lhx1                               |
| Mynn       | Lhx2                               |
| Myo10      | Lhx3                               |
| Myo15b     | Lhx5                               |
| Myo18a     | Lhx6                               |
| Myo18b     | Lhx9                               |
| Myo1c      | Lif                                |
| Myo1e      | Lig3                               |
| Myo1f      | Limd1                              |
| Myo5b      | Limd2                              |
| Myo6       | Limk1                              |
| Myo9b      | Lims1                              |
| Myohd1     | Lims2                              |
| Myom1      | Lin28a                             |
| Mypn       | Lin7b                              |
| Myt1       | Lincpint                           |
| Myzap      | Lingo1                             |
| Mzt1       | Lingo2                             |
| N4bp1      | Lipa                               |
| NAPSB      | Lipc                               |
| NDUFA5     | Lipe                               |
| NEGR1      | Lipf                               |
| NEU1       | Lipg                               |
| NF1        | Lipt2                              |
| NFE2L2     | Lman1                              |
| NFIX       | Lman1l                             |
| NFKBIA     | Lmbr1                              |
| NHE8       | Lmbrd1                             |
| NME7       | Lmcd1                              |
| NOL3///MYC | Lmf1                               |
| NOL5A      | Lmna                               |
| NPM1       | Lmnb2                              |
| NR3C1      | Lmo2                               |
| NRAS       | Lmod1                              |
| NR_000003  | Lmod2                              |
| NR_000004  | Lmx1a                              |
| NR_001277  | Lmx1b                              |
| NR_001460  | Ln timer                           |

|           |                                                     |
|-----------|-----------------------------------------------------|
| NR_001462 | Loh11cr2a                                           |
| NR_002841 | Lonp2                                               |
| NR_002855 | Lor                                                 |
| NR_002865 | Lox                                                 |
| NR_002867 | Loxl1                                               |
| NR_002871 | Loxl3                                               |
| NR_002873 | Loxl4                                               |
| NR_002874 | Lpar1                                               |
| NR_002897 | Lpar2                                               |
| NR_002902 | Lpar4                                               |
| NR_003248 | Lpcat1                                              |
| NR_003293 | Lpgat1                                              |
| NR_003619 | Lphn1                                               |
| NR_003628 | Lpin1                                               |
| NTHL1     | Lpin2                                               |
| NUB1      | Lpin3                                               |
| NUCB1     | Lpl                                                 |
| NUDT9     | Lpp                                                 |
| NUP107    | Lpxn                                                |
| Nab2      | Lrat                                                |
| Naip3     | Lrba                                                |
| Nat11     | Lrfn5                                               |
| Nat13     | Lrg1                                                |
| Nat6      | Lrig1                                               |
| Nat9      | Lrmp                                                |
| Nav2      | Lrp1                                                |
| Nbea      | Lrp1b                                               |
| Nbeal1    | Lrp2                                                |
| Nbeal2    | Lrp3                                                |
| Nbl1      | Lrp5                                                |
| Nbn       | Lrp6                                                |
| Nbr1      | Lrp8                                                |
| Ncapd2    | Lrpap1                                              |
| Ncapd3    | Lrr1                                                |
| Ncdn      | Lrrc15                                              |
| Ncf1      | Lrrc2                                               |
| Nckipsd   | Lrrc20                                              |
| Ncln      | Lrrc4                                               |
| Ncoa1     | Lrrc46                                              |
| Ncoa3     | Lrrc49                                              |
| Ncoa7     | Lrrc51                                              |
| Ncor1     | Lrrc58                                              |
| Ncstn     | Lrrc59                                              |
| Ndrg3     | Lrrc6                                               |
| Ndrg4     | Lrrc8a                                              |
| Ndufa2    | Lrrc8a///Phyhd1                                     |
| Ndufa4    | Lrrc8c                                              |
| Ndufa9    | Lrrc8e                                              |
| Ndufaf1   | Lrrfip1                                             |
| Ndufaf4   | Lrriq4                                              |
| Ndufb8    | Lrrk2                                               |
| Ndufs2    | Lrrn1                                               |
| Ndufs8    | Lrrn2                                               |
| Nubl      | Lrrn3                                               |
| Nedd4l    | Lrrtm1                                              |
| Nedd8     | Lrrtm2                                              |
| Nedd9     | Lrrtm3                                              |
| Nefh      | Lrrtm4                                              |
| Nefl      | Lsmp                                                |
| Nefm      | Lsm2                                                |
| Neil2     | Lsm4                                                |
| Nek1      | Lsp1                                                |
| Nek11     | Lss                                                 |
| Nek7      | Lst1                                                |
| Nek8      | Lta                                                 |
| Nek9      | Lta4h                                               |
| Nell2     | Ltb                                                 |
| Nep       | Ltb4r1                                              |
| Nes       | Ltbp1                                               |
| Neu3      | Ltbp2                                               |
| Neud4     | Ltbp3                                               |
| Neurabin  | Ltbp4                                               |
| Neurod2   | Ltc4s                                               |
| Neurog1   | Ltf                                                 |
| Neurog2   | Ltn1                                                |
| Nf1       | Luc7l                                               |
| Nfasc     | Luc7l2                                              |
| Nfat5     | Luc7l3                                              |
| Nfatc1    | Lum                                                 |
| Nfe2      | Luzp2                                               |
| Nfe2l1    | Lxn                                                 |
| Nfia      | Ly6a                                                |
| Nfib      | Ly6c1///Ly6c2                                       |
| Nfix      | Ly6d                                                |
| Nfkb1     | Ly6h                                                |
| Nfkb2     | Ly6i                                                |
| Nfkbil1   | Ly75                                                |
| Nfu1      | Ly86                                                |
| Ngdn      | Ly96                                                |
| Ngf       | Lynx1                                               |
| Nhej1     | Lypd1                                               |
| Nhlrc2    | Lypd3                                               |
| Nhs1l     | Lyrm2                                               |
| Nif3l1    | Lyrm5                                               |
| Ninj2     | Lysmd2                                              |
| Nip7      | Lyst                                                |
| Nipbl     | Lyz1                                                |
| Nipsnap1  | Lztf1                                               |
| Nit1      | Lztr1                                               |
| Nkd1      | Lzts2                                               |
| Nkg7      | M1ap                                                |
| Nkiras1   | MGST1                                               |
| Nkx2-3    | MRAS                                                |
| Nkx2-5    | MTHFR                                               |
| Nkx6-1    | Mab21l1                                             |
| Nle1      | Mab21l2                                             |
| Nlk       | Mad1l1                                              |
| Nme1      | Mad2l1                                              |
| Nme2      | Mad2l2                                              |
| Nmi       | Madd                                                |
| Nmnat2    | Maea                                                |
| Nmt1      | Maf                                                 |
| Nodal     | Maf1                                                |
| Nog       | Mafb                                                |
| Nol1      | Maff                                                |
| Nol12     | Mafg                                                |
| Nol14     | Mag                                                 |
| Nol4      | Magea1///Magea2///Magea3///Magea5///Magea6///Magea8 |
| Nol5      | Magea4                                              |
| Nol6      | Magea6                                              |
| Nol8      | Mageb1///Mageb2///Mageb3                            |
| Nola2     | Mageb3                                              |
| Nope      | Maged1                                              |
| Nos1      | Maged2                                              |
| Nos3      | Magee1                                              |
| Nosip     | Mageh1                                              |
| Notch1    | MageI2                                              |
| Notch4    | Magi1                                               |
| Nova1     | Magi2                                               |
| Npal3     | Magi3                                               |
| Npas2     | Magt1                                               |
| Npas3     | Mak                                                 |
| Npas4     | Mal                                                 |
| Npc2      | Malat1                                              |
| Npepl1    | Mall                                                |
| Npepps    | Maml1                                               |
| Nphp1     | Maml2                                               |
| Nphs1     | Man1a                                               |
| Npl       | Man1a2                                              |
| Nploc4    | Man1b1                                              |
| Npm1      | Man2b1                                              |
| Npm3      | Man2b2                                              |
| Npr1      | Manba                                               |
| Npr3      | Manbal                                              |
| Nptn      | Maneal                                              |
| Nptx1     | Manf                                                |
| Nr1d1     | Maoa                                                |
| Nr1d2     | Maob                                                |
| Nr1h2     | Map1b                                               |

|                    |                       |        |
|--------------------|-----------------------|--------|
| Nr1h3              | Map1lc3a              |        |
| Nr1h4              | Map1lc3b              |        |
| Nr1i2              | Map1s                 |        |
| Nr1i3              | Map2k2                |        |
| Nr2c2              | Map2k5                |        |
| Nr2e3              | Map2k6                |        |
| Nr2f2              | Map2k7                |        |
| Nr3c2              | Map3k12               |        |
| Nr4a2              | Map3k14               |        |
| Nr4a3              | Map3k2                |        |
| Nr5a1              | Map3k3                |        |
| Nr6a1              | Map3k5                |        |
| Nramp2             | Map3k6                |        |
| Nrarp              | Map3k7                |        |
| Nrbf2              | Map4                  |        |
| Nrcam              | Map4k1                |        |
| Nrd1               | Map4k2                |        |
| Nrg1               | Map4k5                |        |
| Nrgn               | Map6                  |        |
| Nrip1              | Map7                  |        |
| Nrip3              | Map7d1                |        |
| Nrn1               | Mapk10                |        |
| Nrp1               | Mapk11                |        |
| Nrp2               | Mapk14                |        |
| Nrxn1              | Mapk8                 |        |
| Nrxn2              | Mapk8ip1              |        |
| Nrxn3              | Mapk8ip2              |        |
| Nsddr              | Mapk8ip3              |        |
| Nsdhl              | Mapk9                 |        |
| Nsf                | Mapkap1               |        |
| Nsl1               | Mapre1                |        |
| Nspl1              | Mapre2                |        |
| Nsun4              | Mapre3                |        |
| Nt5c1a             | Mapt                  |        |
| Nt5dc3             |                       | Mar-01 |
| Ntan1              |                       | Mar-09 |
| Ntf3               | Marcks                |        |
| Ntf5               | Marcks11              |        |
| Ntn1               | Mark1                 |        |
| Ntng1              | Mark2                 |        |
| Ntrk3              | Mark4                 |        |
| Nua                | Marveld1              |        |
| Nuak2              | Marveld2              |        |
| Nub1               | Marveld3              |        |
| Nucb1              | Mas1                  |        |
| Nudcd1             | Masp1                 |        |
| Nudt16l1           | Masp2                 |        |
| Nudt19             | Mast1                 |        |
| Nudt21             | Mastl                 |        |
| Nudt4              | Mat1a                 |        |
| Nudt5              | Mat2a                 |        |
| Nudt6              | Matk                  |        |
| Nudt9              | Matn1                 |        |
| Nufip1             | Matn2                 |        |
| Nufip2             | Matn3                 |        |
| Numb               | Matn4                 |        |
| Nup153             | Mau2                  |        |
| Nup160             | Mavs                  |        |
| Nup54              | Maz                   |        |
| Nup62              | Mb                    |        |
| Nwd1               | Mbd1                  |        |
| Nxn                | Mbd2                  |        |
| Nxn12              | Mbd3                  |        |
| Nxph1              | Mbd3l2                |        |
| O/E-4S             | Mbd4                  |        |
| OAS1               | Mbl1                  |        |
| OCIAD2             | Mbl2                  |        |
| OR56B4             | Mboat2                |        |
| OR6K2              | Mboat7                |        |
| ORC4L              | Mbp                   |        |
| ORF61              | Mbtps1                |        |
| OSBPL3             | Mc1r                  |        |
| OTTMUSG00000000997 | Mc2r                  |        |
| OTTMUSG00000008561 | Mc3r                  |        |
| OTTMUSG00000015762 | Mc5r                  |        |
| OTTMUSP00000006088 | Mcam                  |        |
| Oas1b              | Mcf2                  |        |
| Oas3               | Mcf2                  |        |
| Oasl2              | Mcg1038069///Ube2n    |        |
| Oat                | Mchr1                 |        |
| Obox3              | Mcm10                 |        |
| Ocm                | Mcm2                  |        |
| Odc1               | Mcm3                  |        |
| Odf2l              | Mcm5                  |        |
| Odz2               | Mcm7                  |        |
| Ogdh               | Mcm9                  |        |
| Ogdhl              | Mcoln3                |        |
| Ogfod1             | Mcpt-ps1              |        |
| Ogfr               | Mcpt4                 |        |
| Ogg1               | Mcpt8                 |        |
| Oit1               | Mcts1                 |        |
| Ola1               | Mdfic                 |        |
| Olfm2              | Mdga2                 |        |
| Olfm3              | Mdk                   |        |
| Olfml2a            | Mdn1                  |        |
| Olfml3             | Me1                   |        |
| Olf1010            | Me2                   |        |
| Olf1359            | Mea1                  |        |
| Olf1361            | Mecom                 |        |
| Olf1420            | Mecp2                 |        |
| Olf1507            | Med1                  |        |
| Olf1404-ps1        | Med12l                |        |
| Olf1462            | Med20                 |        |
| Olf1463            | Med21                 |        |
| Olf1497            | Med24                 |        |
| Olf1512            | Med29                 |        |
| Olf1550            | Med7                  |        |
| Olf1721-ps1        | Med9                  |        |
| Olf1741            | Medag                 |        |
| Olf1782            | Mef2a                 |        |
| Olig3              | Mef2b                 |        |
| Onecut1            | Mef2c                 |        |
| Onecut2            | Mef2d                 |        |
| Optn               | Meg3                  |        |
| Orc1l              | Meg3,Mir1906-2,Mir770 |        |
| Orc4l              | Meg3///Meg3           |        |
| Orc6               | Meig1                 |        |
| Orc6l              | Meis1                 |        |
| Ormdl2             | Meis2                 |        |
| Ormdl3             | Meis3                 |        |
| Orp1               | Mela                  |        |
| Osbp               | Men1                  |        |
| Osbpl11            | Meox1                 |        |
| Osbpl1a            | Meox2                 |        |
| Osbpl7             | Mesdc1                |        |
| Osbpl8             | Mesdc2                |        |
| Osbpl9             | Mest                  |        |
| Osgep              | Met                   |        |
| Osgin1             | Metap1d               |        |
| Osr1               | Metrn                 |        |
| Osr2               | Metrnl                |        |
| Osta               | Mettl1                |        |
| Otub2              | Mettl13               |        |
| Otud4              | Mettl20               |        |
| Otud7b             | Mettl21a              |        |
| Otx1               | Mettl6                |        |
| Otx2               | Mettl7a1              |        |
| Ovca2              | Mettl7a1///Mettl7a2   |        |
| Oxr1               | Mettl7a2              |        |
| Oxsr1              | Mfap2                 |        |
| P140               | Mfap3                 |        |
| P2rx3              | Mfap4                 |        |
| P2rx4              | Mfap5                 |        |
| P2rxl1             | Mfge8                 |        |
| P4ha1              | Mfi2                  |        |
| P4hb               | Mfng                  |        |
| P7                 | Mfsd10                |        |
| PA2G4              | Mfsd11                |        |
| PAG1//PRDX1        | Mfsd4                 |        |



|                    |                           |
|--------------------|---------------------------|
| PAK3//CDKN1A       | Mfsd6                     |
| PAPK-A             | Mfsd6l                    |
| PARP1              | Mfsd7b                    |
| PARP8              | Mfsd7c                    |
| PAX5               | Mfsd8                     |
| PBEF1              | Mga                       |
| PBX2               | Mgat3                     |
| PCDH18             | Mgat4c                    |
| PCDHB16//ME1       | Mgat5                     |
| PCDHGC3            | Mgl1                      |
| PCNA               | Mgll                      |
| PCSK4//SUB1//IFRD1 | Mgme1                     |
| PE1                | Mgmt                      |
| PEA15              | Mgst1                     |
| PEX12              | Mgst3                     |
| PHB                | Mia                       |
| PHKG2              | Mia2                      |
| PIGR               | Mia3                      |
| PIK3CA             | Mical1                    |
| PKD1L1             | Mical2                    |
| PKMYT1             | Mid1                      |
| PLEK               | Mid1ip1                   |
| PLK1               | Mid2                      |
| PMAIP1             | Midn                      |
| PMP22//SP110       | Mier2                     |
| PMS2L5             | Mill2                     |
| PMUR10F            | Mina                      |
| POFUT1             | Minpp1                    |
| POLD1//CDC2        | Miox                      |
| POLD2              | Mip                       |
| POLR1A//RPA1       | Mipol1                    |
| POM121L1P          | Mir1188                   |
| POU2AF1            | Mir143hg                  |
| POU2F2             | Mir1897,Sox2ot            |
| PPFIBP2            | Mir369,Mir410,Mir412,Mirg |
| PPP5C              | Mir425                    |
| PREP2              | Mis12                     |
| PRIM1              | Mitd1                     |
| PRKCB1             | Mix1                      |
| PRKDC              | Mkks                      |
| PRKRIR             | Mkln1                     |
| PRKWNK4            | Mknk1                     |
| PRUNE              | Mkrn1                     |
| PSMA4              | Mkrrn3                    |
| PSMB10             | Mlana                     |
| PSMB8              | Mlec                      |
| PSMB9              | Mlf1                      |
| PTCH               | Mlf2                      |
| PTDSS1             | Mllt1                     |
| PTPN18             | Mllt10                    |
| PTPN6              | Mllt11                    |
| PTPRC              | Mllt3                     |
| PVRIG              | Mlph                      |
| PXMP4              | Mlst8                     |
| Pa2g4              | Mlx                       |
| Pabpn1             | Mlxipl                    |
| Pacs1              | Mmab                      |
| Padi1              | Mmd2                      |
| Paf1               | Mme                       |
| Pafah1b1           | Mme1                      |
| Pafah1b2           | Mmg2                      |
| Pafah1b3           | Mmp11                     |
| Pafah2             | Mmp12                     |
| Paip2b             | Mmp13                     |
| Pak1               | Mmp14                     |
| Pak7               | Mmp15                     |
| Palm               | Mmp16                     |
| Pals1              | Mmp17                     |
| Pan3               | Mmp19                     |
| Panx1              | Mmp1a                     |
| Papd4              | Mmp1b                     |
| Papola             | Mmp2                      |
| Papolg             | Mmp23                     |
| Par3               | Mmp24                     |
| Parc               | Mmp3                      |
| Pard3              | Mmp7                      |
| Pard3b             | Mmp8                      |
| Parg               | Mmp9                      |
| Parl               | Mndal                     |
| Parp11             | Mns1                      |
| Parp14             | Mnt                       |
| Parp3              | Mnx1                      |
| Parp4              | Mobp                      |
| Parp8              | Mocs2                     |
| Parp9              | Mog                       |
| Parva              | Mok                       |
| Patz1              | Morc3                     |
| Pawr               | Morc4                     |
| Pax2               | Morn3                     |
| Pax3               | Morn4                     |
| Pax6               | Mos                       |
| Pax7               | Mospd2                    |
| Pbk                | Mov10                     |
| Pbx3               | Mov10l1                   |
| Pbxip1             | Moxd1                     |
| Pcaf               | Moxd2                     |
| Pcbd1              | Mpdz                      |
| Pcbp1              | Mpg                       |
| Pcbp2              | Mphosph10                 |
| Pcdh1              | Mphosph6                  |
| Pcdh10             | Mphosph8                  |
| Pcdh7              | Mphosph9                  |
| Pcdha4             | Mpi                       |
| Pcdhga1            | Mpl                       |
| Pcf11              | Mpnd                      |
| Pcgf1              | Mpp1                      |
| Pcgf2              | Mpp3                      |
| Pcgf5              | Mpp4                      |
| Pcgf6              | Mpp5                      |
| Pcmt1              | Mpp6                      |
| Pcnp               | Mpped1                    |
| Pcnt               | Mpped2                    |
| Pcnx               | Mpv17l                    |
| Pcp4               | Mpz                       |
| Pcp4l1             | Mpzl2                     |
| Pcsk9              | Mr1                       |
| Pctk2              | Mrap                      |
| Pctk3              | Mras                      |
| Pcyox1             | Mrc1                      |
| Pcyt1a             | Mrc2                      |
| Pdcd10             | Mrgpra1                   |
| Pdcd11             | Mrgpra4                   |
| Pdcd2              | Mrgprb1                   |
| Pdcd6              | Mrgprf                    |
| Pdcl               | Mrgprh                    |
| Pde1b              | Mri1                      |
| Pde3a              | Mrpl10                    |
| Pde3b              | Mrpl11                    |
| Pde4a              | Mrpl15                    |
| Pde4d              | Mrpl19                    |
| Pde4dip            | Mrpl21                    |
| Pde5a              | Mrpl23                    |
| Pde6b              | Mrpl27                    |
| Pde6d              | Mrpl3                     |
| Pde7b              | Mrpl34                    |
| Pde9a              | Mrpl35                    |
| Pdgfa              | Mrpl38                    |
| Pdgfc              | Mrpl41                    |
| Pdgfra             | Mrpl42                    |
| Pdhx               | Mrpl45                    |
| Pdia3              | Mrpl49                    |
| Pdlim1             | Mrpl51                    |
| Pdlim7             | Mrps11                    |
| Pdp2               | Mrps23                    |
| Pdrg1              | Mrps24                    |
| Pds5a              | Mrps25                    |
| Pds5b              | Mrps33                    |
| Pdx1               | Mrps34//Nme3              |
| Pdxk               | Mrps5                     |

|           |                       |
|-----------|-----------------------|
| Pdzd2     | Mrps6                 |
| Pdzd8     | Mrs2                  |
| Pdzrn3    | Mrv1                  |
| Peli2     | Ms4a1                 |
| Pemt      | Ms4a10                |
| Per1      | Ms4a2                 |
| Perld1    | Ms4a4b                |
| Perq1     | Ms4a4c                |
| Pes1      | Ms4a4d                |
| Pex11a    | Ms4a6c                |
| Pex11b    | Ms4a7                 |
| Pex12     | Ms4a8a                |
| Pex13     | Msantd3               |
| Pex14     | Msc                   |
| Pex16     | Msh2                  |
| Pex2      | Msh3                  |
| Pex26     | Msh4                  |
| Pex3      | Msh5                  |
| Pex6      | Msh6                  |
| Pfdn2     | Msi1                  |
| Pfdn4     | Msl1                  |
| Pfkb2     | Msl2                  |
| Pfkl      | Msl3l2                |
| Pfkm      | Msln                  |
| Pfn1      | Msemb                 |
| Pftk1     | Msmo1                 |
| Pgam1     | Msn                   |
| Pgk2      | Msr1                  |
| Pglyrp1   | Msrb2                 |
| Pgm1      | Msx1                  |
| Pgm2l1    | Msx2                  |
| Pgs1      | Msx3                  |
| Phactr4   | Mt1                   |
| Phb       | Mt2                   |
| Phc1      | Mt4                   |
| Phc3      | Mta1                  |
| Phca      | Mta2                  |
| Phex      | Mta3                  |
| Phf10     | Mtag2                 |
| Phf12     | Mtap                  |
| Phf13     | Mtch1                 |
| Phf14     | Mtch2                 |
| Phf15     | Mtcp1                 |
| Phf17     | Mtdh                  |
| Phf19     | Mterfd1               |
| Phf21a    | Mterfd2               |
| Phf21b    | Mterfd3               |
| Phf23     | Mtf1                  |
| Phf6      | Mtfmt                 |
| Phip      | Mtff1                 |
| Phlda2    | Mtfr1l                |
| Phldb1    | Mtg2                  |
| Phldb2    | Mthfd2                |
| Phospho1  | Mthfr                 |
| Phospho2  | Mtmr2                 |
| Phox2b    | Mtmr3                 |
| Pi4k2a    | Mtmr4                 |
| Pi4ka     | Mtmr6                 |
| Pi4kb     | Mtmr7                 |
| Pias1     | Mtmr9                 |
| Pias3     | Mtnr1a                |
| Pid1      | Mto1                  |
| Pig-n     | Mtpn                  |
| Pigl      | Mtrr                  |
| Pign      | Muc13                 |
| Pigo      | Muc15                 |
| Pigw      | Muc3                  |
| Pigy      | Muc4                  |
| Pigyl     | Muc5b                 |
| Pih1d1    | Mucl1                 |
| Pik3ip1   | Mug-ps1///Mug1///Mug2 |
| Pik3r3    | Mug1                  |
| Pik4ca    | Mul1                  |
| Pin1      | Mum1l1                |
| Pip4k2c   | Mup4                  |
| Pip5k1a   | Mup5                  |
| Pip5k1b   | Mus81                 |
| Pipox     | Musk                  |
| Pisd      | Mustn1                |
| Pitpnc1   | Mut                   |
| Pitpnm1   | Mutyh                 |
| Pitx2     | Mvb12a                |
| Pitx3     | Mvd                   |
| Pkig      | Mvk                   |
| Pkmyt1    | Mx1                   |
| Pkn1      | Mxd1                  |
| Pkn2      | Mxd3                  |
| Pkn3      | Mxd4                  |
| Pknox2    | Mxi1                  |
| Pkp4      | Mxra8                 |
| Pla1a     | Myadm                 |
| Pla2g12a  | Myb                   |
| Pla2g6    | Myc                   |
| Plaa      | Mycbpap               |
| Plagl2    | Mycl                  |
| Plcb2     | Mycn                  |
| Plcd3     | Mycs                  |
| Plcl1     | Myct1                 |
| Plcl2     | Myd88                 |
| Pldn      | Myef2                 |
| Plek2     | Myh1                  |
| Plekha1   | Myh11                 |
| Plekha2   | Myh2                  |
| Plekha4   | Myh3                  |
| Plekha5   | Myh4                  |
| Plekha2   | Myh6                  |
| Plekhg3   | Myh7                  |
| Plekhg6   | Myh8                  |
| Plekh2    | My1                   |
| Plekh3    | My10                  |
| Plekhj1   | My12                  |
| Plekhm1   | My14                  |
| Plin      | My17                  |
| Plin1     | My19                  |
| Plk1s1    | Myk                   |
| Plk2      | Myk2                  |
| Plod3     | My1pf                 |
| Plscr1    | Mynn                  |
| Plscr2    | Myo10                 |
| Plscr3    | Myo15b                |
| Pltp      | Myo16                 |
| Plxdc1    | Myo1b                 |
| Plxdc2    | Myo1c                 |
| Plxnb1    | Myo1f                 |
| Plxnb2    | Myo1h                 |
| Plxnc1    | Myo5c                 |
| Plxnd1    | Myo6                  |
| Pml       | Myo7a                 |
| Pmp22     | Myoc                  |
| Pmpcb     | Myocd                 |
| Pmvk      | Myod1                 |
| Pnkp      | Myof                  |
| Pnliprp1  | Myog                  |
| Pnpla2    | Myot                  |
| Pnpla7    | Myoz1                 |
| Pnr       | Myoz2                 |
| Pnrc2     | Myrf                  |
| Pofut1    | Myt1                  |
| Pogz      | Myt1l                 |
| Pol gamma | Myzap                 |
| Pold1     | Mzf1                  |
| Pold3     | N6amt2                |
| Pold4     | NDNF                  |
| Poldip3   | Naa10                 |
| Polg      | Naa15                 |
| Polg2     | Naa60                 |
| Polh      | Naalad2               |
| Poll      | Nab2                  |
| Polm      | Nabp1                 |

|              |                  |
|--------------|------------------|
| Polr1e       | Nabp2            |
| Polr2a       | Nacc1            |
| Polr2h       | Nacc2            |
| Polr3gl      | Naga             |
| Polr3k       | Naglu            |
| Pomt2        | Naip1            |
| Pop1         | Naip2            |
| Pop5         | Naip5            |
| Pop7         | Nampt            |
| Popdc2       | Nanog            |
| Por          | Nanos1           |
| Pot1b        | Nap1l1           |
| Pou2af1      | Nap1l2           |
| Pou2f2       | Nap1l3           |
| Pou2f3       | Nap1l5           |
| Pou3f1       | Napb             |
| Pou3f2       | Napsa            |
| Pou3f3       | Narf             |
| Pou4f3       | Nat3             |
| Ppa2         | Nat8             |
| Ppap2b       | Nat8l            |
| Ppap2c       | Nav2             |
| Ppapdc3      | Nav3             |
| Pparg        | Nbea             |
| Ppargc1a     | Nbl1             |
| Ppargc1b     | Ncald            |
| Ppfbp1       | Ncam1            |
| Ppie         | Ncam2            |
| Ppil3        | Ncan             |
| Ppil4        | Ncapg            |
| Ppm1b        | Ncbp2            |
| Ppm1d        | Ncdn             |
| Ppm1e        | Ncf1             |
| Ppm1f        | Ncf2             |
| Ppm1g        | Nck1             |
| Ppm1h        | Nck2             |
| Ppm1j        | Nckap1l          |
| Ppm1l        | Nckap5l          |
| Ppm2c        | Ncl              |
| Ppme1        | Ncln             |
| Ppox         | Ncmap            |
| Ppp1cc       | Ncoa2            |
| Ppp1r11      | Ncoa3            |
| Ppp1r14d     | Ncoa7            |
| Ppp1r16a     | Ncor2            |
| Ppp1r1b      | Ncs1             |
| Ppp1r2-ps6   | Ndn              |
| Ppp1r37      | Ndp              |
| Ppp1r8       | Ndph             |
| Ppp1r9a      | Ndr3             |
| Ppp1r9b      | Ndr4             |
| Ppp2ca       | Ndst1            |
| Ppp2cb       | Ndst3            |
| Ppp2r1b      | Ndst4            |
| Ppp2r2d      | Ndufa10          |
| Ppp2r3c      | Ndufa12          |
| Ppp2r5a      | Ndufa13///Yjefn3 |
| Ppp2r5b      | Ndufa2           |
| Ppp2r5c      | Ndufa7           |
| Ppp2r5d      | Ndufa9           |
| Ppp3r1       | Ndufab1          |
| Ppp4c        | Ndufaf3          |
| Ppp4r1l-ps   | Ndufaf4          |
| Ppp4r2       | Ndufb11          |
| Pprc1        | Ndufb4           |
| Pptc7        | Ndufb9           |
| Pramef12     | Ndufs5           |
| Prcc         | Ndufs8           |
| Prcd         | Nebi             |
| Prccp        | Necab3           |
| Prdm1        | Necap1           |
| Prdm13       | Nedd4            |
| Prdm15       | Nedd4l           |
| Prdm16       | Nedd9            |
| Prdm2        | Nefh             |
| Prdm6        | Nefl             |
| Prdm8        | Neil3            |
| Prdm9        | Nek3             |
| Prdx1        | Nek4             |
| Prdx2        | Nek6             |
| Prdx3        | Nek8             |
| Prdx6        | Nek9             |
| Prelid2      | Nelfcd           |
| Prep         | Nell1            |
| Prg2         | Nell2            |
| Prhoxnb      | Nemf             |
| Prickle1     | Nenf             |
| Prickle2     | Neo1             |
| Primary Gene | Nepn             |
| Prkaca       | Nes              |
| Prkag3       | Nespas           |
| Prkar2a      | Neto1            |
| Prkar2b      | Neto2            |
| Prkca        | Neu1             |
| Prkcbp1      | Neu2             |
| Prkcc        | Neu3             |
| Prkcd        | Neur14           |
| Prkce        | Neurod1          |
| Prkci        | Neurod4          |
| Prkcn        | Neurod6          |
| Prkcq        | Neurog2          |
| Prkd2        | Neurog3          |
| Prkd3        | Nf1              |
| Prkg1        | Nf2              |
| Prl3d3       | Nfam1            |
| Prmt2        | Nfat5            |
| Prmt6        | Nfatc2           |
| Prmt8        | Nfatc2ip         |
| Prnd         | Nfatc4           |
| Prnp         | Nfe2             |
| Prodh2       | Nfe2l2           |
| Prok2        | Nfia             |
| Prom1        | Nfib             |
| Prom2        | Nfic             |
| Prosl        | Nfil3            |
| Prox1        | Nfix             |
| Prpf19       | Nfkb2            |
| Prpf3        | Nfkbie           |
| Prpf38a      | Nfu1             |
| Prpf38b      | Nfx1             |
| Prpf4        | Nfxl1            |
| Prpf40a      | Nfyb             |
| Prpf4b       | Ngb              |
| Prph         | Ngfr             |
| Prps1        | Ngp              |
| Prpsap1      | Nhedc1           |
| Prr11        | Nhedc2           |
| Prr12        | Nhlh1            |
| Prr3         | Nhp2             |
| Prr6         | Nhsl2            |
| Prcc2b       | Nicn1            |
| Prcc2c       | Nid1             |
| Prrg2        | Nid2             |
| Prrg4        | Ninj2            |
| Prrt3        | Nipa2            |
| Prxl1        | Nisch            |
| Prss16       | Nit2             |
| Prss36       | Nkain1           |
| Prss8        | Nkain4           |
| Prssl1       | Nkap             |
| Prtg         | Nkapl            |
| Prune        | Nkd1             |
| Prx          | Nkd2             |
| Psat1        | Nktr             |
| Psd          | Nkx1-2           |
| Psd3         | Nkx2-1           |
| Psip1        | Nkx2-2           |
| Psma1        | Nkx2-4           |
| Psma3        | Nkx2-9           |

|                   |                 |
|-------------------|-----------------|
| Psm4              | Nkx3-2          |
| Psm5              | Nkx6-2          |
| Psm7              | Nle1            |
| Psmb1             | Nlgn1           |
| Psmb10            | Nlgn2           |
| Psmb3             | Nlk             |
| Psmb6             | Nlrp3           |
| Psmb7             | Nlrp4c          |
| Psmb8             | Nlrp5           |
| Psmb9             | Nlrp6           |
| Psmbeta           | Nmb             |
| Psmc2             | Nmd3            |
| Psmc5             | Nme1            |
| Psmc11            | Nme2            |
| Psmc12            | Nme4            |
| Psmc7             | Nmnat1          |
| Psmc9             | Nmrk1           |
| Psmc1             | Nmt1            |
| Psmc2             | Nnat            |
| Psmf1             | Nnmt            |
| Psmg4             | Nnt             |
| Psors1c2          | Nobox           |
| Pspc1             | Noc4l           |
| Pstpip1           | Nodal           |
| Pstpip2           | Nog             |
| Ptcd2             | Nol11           |
| Ptch1             | Nol3            |
| Ptch2             | Nol6            |
| Ptcra             | Nolc1           |
| Ptdsr             | Nono            |
| Ptdss2            | Nop16           |
| Pten              | Nop56           |
| Ptger1            | Nop58           |
| Ptger2            | Nop9            |
| Ptgs2             | Nos1            |
| Ptma              | Nos3            |
| Ptms              | Nosip           |
| Ptp4a2            | Notch3          |
| Ptplad1           | Notch4          |
| Ptpn1             | Notum           |
| Ptpn12            | Nov             |
| Ptpn13            | Nova1           |
| Ptpn14            | Nox4            |
| Ptpn18            | Npas1           |
| Ptpn6             | Npas2           |
| Ptpn9             | Npas3           |
| Ptprb             | Npas4           |
| Ptprcap           | Npcd///Nptxr    |
| Ptprf             | Npepps          |
| Ptprh             | Npffr2          |
| Ptprj             | Nphp1           |
| Ptprk             | Nphp3           |
| Ptrf              | Nphs1           |
| Ptrh2             | Nphs2           |
| Pttg1ip           | Npm3///Npm3-ps1 |
| Pum1              | Npnt            |
| Pum2              | Nppa            |
| Punc              | Nppb            |
| Pura              | Nppc            |
| Purb              | Npr2            |
| Pus7l             | Npr3            |
| Pvrl1             | Nptx2           |
| Pvrl2             | Npy             |
| Pvt1              | Npy1r           |
| Pwwwp2            | Npy5r           |
| Pxdn              | Npy6r           |
| Pxk               | Nqo2            |
| Pxmp4             | Nr0b1           |
| Pxn               | Nr0b2           |
| Pxt1              | Nr1d1           |
| Pycr2             | Nr1d2           |
| Pygo2             | Nr1h3           |
| Pyroxd1           | Nr1h4           |
| QRSL1             | Nr1i3           |
| Qars              | Nr2c1           |
| Qil1              | Nr2c2           |
| Qpct              | Nr2e3           |
| Qpctl             | Nr2f1           |
| Qprt              | Nr2f2           |
| Qrich1            | Nr3c1           |
| Qsox2             | Nr3c2           |
| RAB3IL1           | Nr4a1           |
| RABIF             | Nr4a2           |
| RAD23B            | Nr4a3           |
| RALY              | Nr5a1           |
| RAP1B             | Nr5a2           |
| RARRES3           | Nrep            |
| RASSF7            | Nrf1            |
| RB1               | Nrg2            |
| RBBP5             | Nrg3            |
| RBCK1             | Nrg4            |
| RBM25             | Nrgn            |
| RFX1              | Nrip1           |
| RFX5              | Nrk             |
| RGS18///RGS13     | Nrl             |
| RGS3              | Nrn1            |
| RHOH              | Nrp1            |
| RIC8A             | Nrp2            |
| RIOK2             | Nrros           |
| RLIM              | Nrsn1           |
| RNASEH2A///JUNB   | Nrxn1           |
| RNASEL            | Nsa2            |
| RNF13             | Nsd1            |
| RNF219            | Nsdhl           |
| RNF5P1            | Nsg1            |
| RNaseP_nuc        | Nsmaf           |
| RP23-113F14.3     | Nsmce4a         |
| RP23-349B16.3     | Nsmf            |
| RP23-381B19.7     | Nsun4           |
| RP23-391K14.2-001 | Nsun5           |
| RP23-445D13.2     | Nt5c1b          |
| RP23-467J12.2-001 | Nt5c2           |
| RP23-81E16.2-005  | Nt5c3b          |
| RP23-92B18.7      | Nt5dc3          |
| RP24-73K9.3       | Nt5e            |
| RPL10A            | Ntm             |
| RPL21             | Ntmt1           |
| RPS6              | Ntn1            |
| RPS6KA1           | Ntn3            |
| RTDR1             | Ntn4            |
| Rab11b            | Ntng1           |
| Rab11fip1         | Ntrk2           |
| Rab11fip4         | Ntrk3           |
| Rab13             | Nts             |
| Rab15             | Ntsr1           |
| Rab19             | Ntsr2           |
| Rab20             | Nub1            |
| Rab28             | Nucb2           |
| Rab2B             | Nucks1          |
| Rab2b             | Nudc            |
| Rab34             | Nudcd1          |
| Rab37             | Nudcd1///Nudcd1 |
| Rab38             | Nudcd2          |
| Rab3d             | Nudcd3          |
| Rab3il1           | Nudt1           |
| Rab4a             | Nudt10///Nudt11 |
| Rab5b             | Nudt16          |
| Rab5c             | Nudt16l1        |
| Rab6              | Nudt4           |
| Rab6ip1           | Numb            |
| Rab8A             | Numbl           |
| Rab8a             | Nup133          |
| Rab8b             | Nup210          |
| Rabep1            | Nup35           |
| Rabepk            | Nup54           |
| Rabgap1           | Nup62           |
| Rabgap1l          | Nup98           |
| Rabif             | Nupl1           |
| Rac3              | Nupr1           |

|          |                   |
|----------|-------------------|
| Rad23a   | Nus1              |
| Rad51    | Nusap1            |
| Rad51ap1 | Nwd1              |
| Rad51c   | Nxf2              |
| Rad51l1  | Nxf7              |
| Rad54b   | Nxn               |
| Rad54l   | Nxn1              |
| Rad9     | Nxn12             |
| Rad9b    | Nxph1             |
| Raet1a   | Nynrin            |
| Raet1c   | ORF63             |
| Raet1e   | OSR1              |
| Raf1     | OTTMUSG0000006457 |
| Rag2     | Oaf               |
| Rage     | Oas1a             |
| Rai1     | Oas1d///Oas1e     |
| Rai12    | Oas1e             |
| Rai16    | Oas1              |
| Ralbp1   | Oasl2             |
| Ralgps2  | Oat               |
| Raly     | Oaz2              |
| Ramp2    | Obox1///Obox2     |
| Ranbp17  | Obox2             |
| Ranbp3   | Obox3             |
| Rangap1  | Obp1a             |
| Rapgef2  | Obp2a             |
| Rapgef3  | Obsl1             |
| Rapgef5  | Oc90              |
| Raptor   | Odc1              |
| Rara     | Odf1              |
| Rarg     | Odf2              |
| Rars     | Odf4              |
| Rasa1    | Odz2              |
| Rasa3    | Ofa               |
| Rasa4    | Ogfr1             |
| Rasal2   | Ogn               |
| Rasd1    | Ogt               |
| Rasgef1a | Oit1              |
| Rasgrf1  | Oit3              |
| Rasl11a  | Ola1              |
| Rassf1   | Olah              |
| Rassf4   | Olfm1             |
| Rassf5   | Olfm2             |
| Rbbp8    | Olfm3             |
| Rbbp9    | Olfml2b           |
| Rbck1    | Olfml3            |
| Rbl1     | Olf140            |
| Rbm13    | Olf15             |
| Rbm14    | Olf1508           |
| Rbm15    | Olf1509           |
| Rbm15b   | Olf151///Olf160   |
| Rbm19    | Olf155            |
| Rbm22    | Olf159            |
| Rbm27    | Olf17             |
| Rbm35a   | Olf480            |
| Rbm4     | Olf49             |
| Rbm43    | Olf544            |
| Rbm4b    | Olf64             |
| Rbm6     | Olf66             |
| Rbm8a    | Olf67             |
| Rbm9     | Olf672            |
| Rbms2    | Olf68///Olf69     |
| Rbmxrt   | Olf690            |
| Rbpj     | Olf71             |
| Rbpms    | Olf74             |
| Rbpms2   | Olf749            |
| Rc3h2    | Olf78             |
| Rcan1    | Olig1             |
| Rcc2     | Olig2             |
| Rcor1    | Olig3             |
| Rcor3    | Olr1              |
| Rdh10    | Omd               |
| Rdh13    | Omg               |
| Rdh5     | Omt2a             |
| Rdm1     | Onecut1           |
| Reep2    | Onecut3           |
| Reep3    | Opcml             |
| Refbp2   | Ophn1             |
| Relb     | Opn1mw            |
| Reln     | Opn1sw            |
| Rem2     | Opn3              |
| Reps1    | Oprk1             |
| Reps2    | Oprl1             |
| Rere     | Oprm1             |
| Rerg     | Orc2              |
| Rev3l    | Orc4              |
| Rexo2    | Orm1              |
| Rfc4     | Orm2              |
| Rfng     | Orm3              |
| Rftn2    | Os9               |
| Rfwd2    | Osbpl1a           |
| Rfwd3    | Osbpl6            |
| Rfx1     | Osbpl9            |
| Rfx3     | Oscar             |
| Rfx4     | Osm               |
| Rfx5     | Osr1              |
| Rfx7     | Osr2              |
| Rfxank   | Ost4              |
| Rfxdc2   | Ostc              |
| Rg9mtd1  | Otc               |
| Rg9mtd2  | Otoa              |
| Rgl1     | Otof              |
| Rgl2     | Otog              |
| Rgma     | Otor              |
| Rgmb     | Otos              |
| Rgncf    | Otp               |
| Rgs10    | Otub1             |
| Rgs14    | Otud4             |
| Rgs16    | Otud5             |
| Rgs20    | Otud7a            |
| Rgs7     | Otud7b            |
| Rhbdd2   | Otx2              |
| Rhbdd3   | Ovca2             |
| Rhbdl3   | Ovol1             |
| Rhd      | Oxnad1            |
| Rheb     | Oxsm              |
| Rhebl1   | Oxtr              |
| Rhobtb2  | P2rx1             |
| Rhoc     | P2rx4             |
| Rhod     | P2ry12            |
| Rhof     | P2ry13            |
| Rhot1    | P2ry14            |
| Rhou     | P2ry4             |
| Rhov     | P2ry6             |
| Rimbp3   | P4ha1             |
| Rimklb   | P4ha2             |
| Rims2    | P4ha3             |
| Ring1    | P4hb              |
| Rinl     | PAGR1A            |
| Ripply3  | PAPPA             |
| Rit2     | PCBP3             |
| Rkhd3    | PIEZO2            |
| Rlbp1    | Pabpc1            |
| Rmnd5a   | Pabpc2            |
| Rmnd5b   | Pabpc5            |
| Rnaseh1  | Pabpn1            |
| Rnaseh2a | Pacrgl            |
| Rnase1   | Pacs2             |
| Rnasen   | Pacsin1           |
| Rnd1     | Pacsin3           |
| Rnd2     | Padi1             |
| Rnd3     | Padi2             |
| Rnf10    | Padi3             |
| Rnf113a2 | Padi4             |
| Rnf121   | Pafah1b2          |
| Rnf126   | Pafah1b3          |
| Rnf144b  | Pag1              |
| Rnf145   | Pagr1a            |
| Rnf157   | Paip1             |

|                 |                                                                                                         |
|-----------------|---------------------------------------------------------------------------------------------------------|
| Rnf168          | Pak1                                                                                                    |
| Rnf187          | Pak3                                                                                                    |
| Rnf19b          | Pak6                                                                                                    |
| Rnf20           | Pald1                                                                                                   |
| Rnf220          | Palm                                                                                                    |
| Rnf26           | Palmd                                                                                                   |
| Rnf31           | Pam                                                                                                     |
| Rnf32           | Pank3                                                                                                   |
| Rnf43           | Papolb                                                                                                  |
| Rnh1            | Pappa                                                                                                   |
| Rnmtd2          | Pappa2                                                                                                  |
| Rnps1           | Papss2                                                                                                  |
| Robo1           | Paqr4                                                                                                   |
| Rock1           | Paqr8                                                                                                   |
| Rod1            | Pard3                                                                                                   |
| Rora            | Pard6a                                                                                                  |
| Rorb            | Park2                                                                                                   |
| Rp23-297j14.5   | Parm1                                                                                                   |
| Rpap2           | Parp16                                                                                                  |
| Rpl12           | Parp3                                                                                                   |
| Rpl13a          | Parp6                                                                                                   |
| Rpl15           | Parp9                                                                                                   |
| Rpl17           | Parva                                                                                                   |
| Rpl17-ps1       | Parvb                                                                                                   |
| Rpl18           | Pate4                                                                                                   |
| Rpl19           | Patz1                                                                                                   |
| Rpl21           | Pax1                                                                                                    |
| Rpl23           | Pax3                                                                                                    |
| Rpl23a          | Pax4                                                                                                    |
| Rpl27           | Pax5                                                                                                    |
| Rpl28           | Pax6                                                                                                    |
| Rpl29           | Pax7                                                                                                    |
| Rpl30-ps6       | Pax9                                                                                                    |
| Rpl32           | Paxbp1                                                                                                  |
| Rpl35a          | Paxip1                                                                                                  |
| Rpl36           | Pbld1                                                                                                   |
| Rpl37           | Pbp2                                                                                                    |
| Rpl37a          | Pbsn                                                                                                    |
| Rpl4            | Pbx1                                                                                                    |
| Rpl41           | Pbx2                                                                                                    |
| Rpl7            | Pbx3                                                                                                    |
| Rpl71           | Pbx4                                                                                                    |
| Rpl8            | Pbxip1                                                                                                  |
| Rpn1            | Pcbd1                                                                                                   |
| Rpn2            | Pcbd2                                                                                                   |
| Rpo1-3          | Pcbp3                                                                                                   |
| Rpp21           | Pcbp4                                                                                                   |
| Rprd1b          | Pccb                                                                                                    |
| Rps11           | Pcdh10                                                                                                  |
| Rps16           | Pcdh11x                                                                                                 |
| Rps2            | Pcdh15                                                                                                  |
| Rps25           | Pcdh17                                                                                                  |
| Rps25-ps1       | Pcdh18                                                                                                  |
| Rps26           | Pcdh20                                                                                                  |
| Rps27           | Pcdh8                                                                                                   |
| Rps27a          | Pcdha1,Pcdha10,Pcdha11,Pcdha12,Pcdha2,Pcdha3,Pcdha4,Pcdha4-g,Pcdha5,Pcdha6,Pcdha7,Pcdha8,Pcdha9,Pcdhac1 |
| Rps28           | Pcdha1///Pcdha10///Pcdha11///Pcdha12///Pcdha2///Pcdha3///Pcdha4///Pcdha5///Pcdha6///Pcdha7///Pcdha8///P |
| Rps4x           | Pcdha1///Pcdha10///Pcdha11///Pcdha12///Pcdha2///Pcdha4///Pcdha9///Pcdhac1///Pcdhac2                     |
| Rps6ka4         | Pcdhb1                                                                                                  |
| Rps6ka5         | Pcdhb10                                                                                                 |
| Rps6kb1         | Pcdhb11                                                                                                 |
| Rps6kl1         | Pcdhb12                                                                                                 |
| Rps7            | Pcdhb13                                                                                                 |
| Rpsa            | Pcdhb14                                                                                                 |
| Rragc           | Pcdhb15                                                                                                 |
| Rragd           | Pcdhb16                                                                                                 |
| Rras2           | Pcdhb17                                                                                                 |
| Rrm1            | Pcdhb18                                                                                                 |
| Rrm2            | Pcdhb19                                                                                                 |
| Rrp15           | Pcdhb2                                                                                                  |
| Rrp1b           | Pcdhb20                                                                                                 |
| Rrs1            | Pcdhb21                                                                                                 |
| Rsad2           | Pcdhb22                                                                                                 |
| Rsb1            | Pcdhb3                                                                                                  |
| Rsf1            | Pcdhb4                                                                                                  |
| Rsph1           | Pcdhb5                                                                                                  |
| Rspo2           | Pcdhb6                                                                                                  |
| Rspry1          | Pcdhb7                                                                                                  |
| Rsrc2           | Pcdhb8                                                                                                  |
| Rtbdn           | Pcdhb9                                                                                                  |
| Rtbd            | Pcdhga1///Pcdhga10///Pcdhga11///Pcdhga12///Pcdhga2///Pcdhga3///Pcdhga4///Pcdhga5///Pcdhga6///Pcdhga7/// |
| Rtcd1           | Pcgf1                                                                                                   |
| Rtkn            | Pcgf2                                                                                                   |
| Rtn2            | Pcgf6                                                                                                   |
| Rtn3            | Pcid2                                                                                                   |
| Rtn4            | Pck1                                                                                                    |
| Rtn4rl1         | Pclo                                                                                                    |
| Rtp3            | Pcm1                                                                                                    |
| Rufy1           | Pcmt1                                                                                                   |
| Rufy3           | Pcmt2                                                                                                   |
| Rufy4           | Pcnp                                                                                                    |
| Rundc3a         | Pcnx                                                                                                    |
| Rundc3b         | Pcnx4                                                                                                   |
| Runx1           | Pcolce                                                                                                  |
| Runx1t1         | Pcp2                                                                                                    |
| Rusc1           | Pcp4                                                                                                    |
| Rusc2           | Pcp41                                                                                                   |
| Rwdd2b          | Pcsk1n                                                                                                  |
| Rxrb            | Pcsk2                                                                                                   |
| Rxrip110        | Pcsk5                                                                                                   |
| Rybp            | Pcsk6                                                                                                   |
| Ryr2            | Pctk2                                                                                                   |
| S100A4          | Pctp                                                                                                    |
| S100A6          | Pcx                                                                                                     |
| S100b           | Pcyt1a                                                                                                  |
| S1pr3           | Pcyt1b                                                                                                  |
| SART3           | Pcyt2                                                                                                   |
| SASH1           | Pdap1                                                                                                   |
| SCARB1          | Pdc                                                                                                     |
| SDR39U1         | Pdcd1                                                                                                   |
| SF3B14          | Sep-07 Pdcd6ip                                                                                          |
| SGIP1alpha      | Pdcl2                                                                                                   |
| SH2B3           | Pde10a                                                                                                  |
| SH3BP5L         | Pde1a                                                                                                   |
| SH3KBP1         | Pde1b                                                                                                   |
| SH3d19          | Pde1c                                                                                                   |
| SHC1            | Pde2a                                                                                                   |
| SHMT2           | Pde3a                                                                                                   |
| SIAH2           | Pde3b                                                                                                   |
| SLC25A21///ODC1 | Pde4a                                                                                                   |
| SLC25A22        | Pde4dip                                                                                                 |
| SLC25A37///MSC  | Pde6a                                                                                                   |
| SLC2A5          | Pde6b                                                                                                   |
| SLC7A11         | Pde6d                                                                                                   |
| SMG7            | Pde6g                                                                                                   |
| SMPD3           | Pde7a                                                                                                   |
| SMS             | Pde7b                                                                                                   |
| SNORA17         | Pde8a                                                                                                   |
| SNORA25         | Pde8b                                                                                                   |
| SNORA32         | Pde9a                                                                                                   |
| SNORA50         | Pdgfb                                                                                                   |
| SNORA70         | Pdgfc                                                                                                   |
| SNORA71         | Pdgfd                                                                                                   |
| SNRPF           | Pdgfra                                                                                                  |
| SOX4            | Pdgfrb                                                                                                  |
| SP1             | Pdha                                                                                                    |
| SP100           | Pdia3                                                                                                   |
| SP110           | Pdia4                                                                                                   |
| SP140           | Pdia5                                                                                                   |
| SPANXE          | Pdia6                                                                                                   |
| SPANX5          | Pdik1                                                                                                   |
| SPATA4          | Pdk2                                                                                                    |
| SPC25           | Pdk3                                                                                                    |
| SPHK1a          | Pdk4                                                                                                    |
| SPI1            | Pdlim1                                                                                                  |
| SPIB            | Pdlim2                                                                                                  |
| SREBF2          | Pdlim3                                                                                                  |
| SSR2            | Pdlim4                                                                                                  |
|                 | Pdlim5                                                                                                  |

|           |                                       |
|-----------|---------------------------------------|
| ST3GAL1   | Pdlim7                                |
| ST6GAL1   | Pdjp                                  |
| STAP1     | Pdrg1                                 |
| STAT6     | Pdss1                                 |
| SYK       | Pdx1                                  |
| Sacm1l    | Pdxdc1                                |
| Sae1      | Pdxk                                  |
| Sall1     | Pdyp                                  |
| Sall2     | Pdyn                                  |
| Sall3     | Pdzd11                                |
| Samd14    | Pdzd3                                 |
| Samd4     | Pdzd9                                 |
| Samd4b    | Pdzk1                                 |
| Samd5     | Pdzrn3                                |
| Sap130    | Pea15a                                |
| Sap30     | Peak1                                 |
| Sap30l    | Pear1                                 |
| Saps2     | Pebp1                                 |
| Sar1a     | Pecam1                                |
| Sash1     | Peg12                                 |
| Sat2      | Peg3                                  |
| Sbf2      | Pemt                                  |
| Sbno2     | Penk                                  |
| Scamp2    | Penk1                                 |
| Scamp3    | Per2                                  |
| Scarb1    | Per3                                  |
| Scarb2    | Perp                                  |
| Sccpdh    | Pet100                                |
| Scd1      | Pet2                                  |
| Scd2      | Pex13                                 |
| Scd3      | Pex16                                 |
| Scg5      | Pex19                                 |
| Scgn      | Pex5                                  |
| Schip1    | Pex5l                                 |
| Scin      | Pex6                                  |
| Scly      | Pfdn1                                 |
| Scml4     | Pfdn5                                 |
| Scn8a     | Pfdn6                                 |
| Scnn1a    | Pkfb1                                 |
| Scotin    | Pkfb2                                 |
| Scp2      | Pkfb3                                 |
| Scrn2     | Pkfl                                  |
| Scube3    | Pkfp                                  |
| Scye1     | Pfn2                                  |
| Sdccag1   | Pfn3                                  |
| Sdccag10  | Pfpl                                  |
| Sdccag8   | Pgam2                                 |
| Sdf2      | Pgc                                   |
| Sdr39u1   | Pgd                                   |
| Sdsl      | Pgf                                   |
| Sec1      | Pgk1                                  |
| Sec11a    | Pgk2                                  |
| Sec11c    | Pglyrp1                               |
| Sec14l2   | Pgm1                                  |
| Sec15l2   | Pgm2l1                                |
| Sec16a    | Pgp                                   |
| Sec16b    | Pgpep1                                |
| Sec23b    | Pgr                                   |
| Sec31b    | Phactr1                               |
| Sec61g    | Phactr2                               |
| Sec62     | Phactr3                               |
| Sec63     | Phc1                                  |
| Sectm1b   | Phex                                  |
| Seh1l     | Phf19                                 |
| Sel1l3    | Phf2                                  |
| Sema3a    | Phf20l1                               |
| Sema4a    | Phf21a                                |
| Sema4b    | Phf3                                  |
| Sema4f    | Phgdh                                 |
| Sema5a    | Phip                                  |
| Sema5b    | Phka1                                 |
| Sema6a    | Phka2                                 |
| Semcap2   | Phkg1                                 |
| Semcap3   | Phldb1                                |
| Senp1     | Phldb2                                |
| Senp7     | Phospho2                              |
| Senp8     | Phox2a                                |
|           | Sep-01 Phpt1                          |
|           | Sep-02 Phxr1                          |
|           | Sep-04 Phxr2                          |
|           | Sep-07 Phxr4                          |
|           | Sep-09 Phyhipl                        |
|           | Sep-11 Phykpl                         |
|           | Sep-15 Pi15                           |
| Sepw1     | Pi16                                  |
| Serbp1    | Pi4k2a                                |
| Serf2     | Pi4ka                                 |
| Sergef    | Pias2                                 |
| Serinc2   | Pibf1                                 |
| Serinc3   | Pigb                                  |
| Serpinb6a | Pigc                                  |
| Serpinb9  | Pigk                                  |
| Sertad1   | Pign                                  |
| Sesn2     | Pigq                                  |
| Set       | Pigr                                  |
| Setbp1    | Pigu                                  |
| Setd1b    | Pigx                                  |
| Setd2     | Pik3ap1                               |
| Setd3     | Pik3ca                                |
| Setd5     | Pik3cd                                |
| Setd6     | Pik3r1                                |
| Setd7     | Pikfyve                               |
| Setdb2    | Pilra                                 |
| Sez4      | Pilrb1                                |
| Sez6      | Pim1                                  |
| Sf3a2     | Pim3                                  |
| Sf3a3     | Pink1                                 |
| Sf3b2     | Pinlyp                                |
| Sf3b5     | Pinx1                                 |
| Sf4       | Pip                                   |
| Sfmbt2    | Pip4k2a                               |
| Sfpi1     | Pip4k2b                               |
| Sfrp1     | Pip4k2c                               |
| Sfrs1     | Pip5k1a                               |
| Sfrs10    | Pip5k1b                               |
| Sfrs14    | Pip5k1c                               |
| Sfrs15    | Pip5k1l                               |
| Sfrs2     | Pipox                                 |
| Sfrs3     | Pira1///Pira11///Pira2///Pira5///Pirb |
| Sfrs4     | Pithd1                                |
| Sfrs9     | Pitpnb                                |
| Sfxn1     | Pitpnc1                               |
| Sfxn2     | Pitpnm1                               |
| Sgca      | Pitpnm3                               |
| Sgcz      | Pitx1                                 |
| Sgip1     | Pitx2                                 |
| Sgk       | Pitx3                                 |
| Sgk269    | Piwil2                                |
| Sgk3      | Pja1                                  |
| Sgms1     | Pja2                                  |
| Sgo1      | Pkd1                                  |
| Sgol1     | Pkd2                                  |
| Sgpl1     | Pkd2l2                                |
| Sgpp1     | Pkdcc                                 |
| Sh2b1     | Pkdrej                                |
| Sh2b3     | Pkhd1                                 |
| Sh2bpsm1  | Pkhd1l1                               |
| Sh2d5     | Pkia                                  |
| Sh3bp5    | Pkig                                  |
| Sh3bp5l   | Pklr                                  |
| Sh3glb1   | Pkmyt1                                |
| Sh3kbp1   | Pkn1///Ptger1                         |
| Sh3md4    | Pknox1                                |
| Sh3px3    | Pknox2                                |
| Sh3pxd2a  | Pkp1                                  |
| Sh3rf2    | Pkp3                                  |
| Shank1    | Pla1a                                 |
| Shank2    | Pla2g12a                              |
| Shbg      | Pla2g15                               |

|          |                     |
|----------|---------------------|
| Shc1     | Pla2g1b             |
| Shc2     | Pla2g2d             |
| Shc3     | Pla2g2e /// Pla2g2f |
| Shc4     | Pla2g2f             |
| Shd      | Pla2g6              |
| Shf      | Pla2g7              |
| Shisa5   | Pla2r1              |
| Shmt1    | Plaa                |
| Shoc2    | Plac1               |
| Shq1     | Plac8               |
| Shroom2  | Plag1               |
| Si       | Plagl1              |
| Siah2    | Plagl2              |
| Sid470   | Plau                |
| Sidt1    | Plbd2               |
| Sin3a    | Plcb1               |
| Sipa111  | Plcb2               |
| Sipa113  | Plcb4               |
| Sirt1    | Plce1               |
| Sirt4    | Plcg2               |
| Sirt5    | Plch2               |
| Sirt6    | Plcl2               |
| Sit1     | Plcz1               |
| Six1     | Pld1                |
| Six3     | Pld4                |
| Six4     | Plek                |
| Six5     | Plek2               |
| Skap1    | Plekha2             |
| Ski      | Plekha3             |
| Skil     | Plekha4             |
| Skp1a    | Plekha5             |
| Slbp     | Plekha6             |
| Slc10a7  | Plekha7             |
| Slc11a1  | Plekha1             |
| Slc12a2  | Plekha1             |
| Slc12a4  | Plekha2             |
| Slc12a5  | Plekha2             |
| Slc12a7  | Plekha1             |
| Slc12a8  | Plekha1             |
| Slc12a9  | Plekha1             |
| Slc13a3  | Plekha1             |
| Slc13a4  | Plekha1             |
| Slc16a13 | Plekha1             |
| Slc16a3  | Plekha1             |
| Slc16a5  | Plekha1             |
| Slc16a6  | Plekha1             |
| Slc16a8  | Plekha1             |
| Slc18a1  | Plekha1             |
| Slc1a4   | Plekha1             |
| Slc22a15 | Plekha1             |
| Slc22a17 | Plekha1             |
| Slc23a2  | Plekha1             |
| Slc23a3  | Plekha1             |
| Slc25a11 | Plekha1             |
| Slc25a13 | Plekha1             |
| Slc25a2  | Plekha1             |
| Slc25a22 | Plekha1             |
| Slc25a30 | Plekha1             |
| Slc25a34 | Plekha1             |
| Slc25a36 | Plekha1             |
| Slc25a38 | Plekha1             |
| Slc25a39 | Plekha1             |
| Slc25a41 | Plekha1             |
| Slc25a42 | Plekha1             |
| Slc25a44 | Plekha1             |
| Slc25a46 | Plekha1             |
| Slc26a8  | Plekha1             |
| Slc2a10  | Plekha1             |
| Slc2a13  | Plekha1             |
| Slc2a2   | Plekha1             |
| Slc2a3   | Plekha1             |
| Slc2a4   | Plekha1             |
| Slc30a2  | Plekha1             |
| Slc30a3  | Plekha1             |
| Slc30a7  | Plekha1             |
| Slc30a9  | Plekha1             |
| Slc31a1  | Plekha1             |
| Slc35a5  | Plekha1             |
| Slc35b1  | Plekha1             |
| Slc35d1  | Plekha1             |
| Slc35e4  | Plekha1             |
| Slc35f1  | Plekha1             |
| Slc35f5  | Plekha1             |
| Slc37a1  | Plekha1             |
| Slc37a2  | Plekha1             |
| Slc37a3  | Plekha1             |
| Slc38a1  | Plekha1             |
| Slc38a2  | Plekha1             |
| Slc39a1  | Plekha1             |
| Slc39a11 | Plekha1             |
| Slc39a13 | Plekha1             |
| Slc39a2  | Plekha1             |
| Slc39a7  | Plekha1             |
| Slc44a1  | Plekha1             |
| Slc45a3  | Plekha1             |
| Slc45a4  | Plekha1             |
| Slc4a1   | Plekha1             |
| Slc4a7   | Plekha1             |
| Slc4a9   | Plekha1             |
| Slc5a2   | Plekha1             |
| Slc5a4b  | Plekha1             |
| Slc6a1   | Plekha1             |
| Slc6a4   | Plekha1             |
| Slc6a6   | Plekha1             |
| Slc6a9   | Plekha1             |
| Slc7a5   | Plekha1             |
| Slc7a7   | Plekha1             |
| Slc7a8   | Plekha1             |
| Slc7a9   | Plekha1             |
| Slc8a2   | Plekha1             |
| Slc9a1   | Plekha1             |
| Slc9a3r2 | Plekha1             |
| Slc9a8   | Plekha1             |
| Slco2b1  | Plekha1             |
| Slco5a1  | Plekha1             |
| Sifn2    | Plekha1             |
| Slk      | Plekha1             |
| Slo      | Plekha1             |
| Sltm     | Plekha1             |
| Smx5     | Plekha1             |
| Smad1    | Plekha1             |
| Smad3    | Plekha1             |
| Smad5    | Plekha1             |
| Smad7    | Plekha1             |
| Smarca2  | Plekha1             |
| Smarcd2  | Plekha1             |
| Smarcd3  | Plekha1             |
| Smarce1  | Plekha1             |
| Smc6     | Plekha1             |
| Smcr8    | Plekha1             |
| Smek2    | Plekha1             |
| Smg5     | Plekha1             |
| Smg6     | Plekha1             |
| Smg7     | Plekha1             |
| Smndc1   | Plekha1             |
| Smurf1   | Plekha1             |
| Smurf2   | Plekha1             |
| Snap23   | Plekha1             |
| Snap29   | Plekha1             |
| Snapc2   | Plekha1             |
| Snapc5   | Plekha1             |
| Sncaip   | Plekha1             |
| Sned1    | Plekha1             |
| Snf8     | Plekha1             |
| Snip1    | Plekha1             |
| Snord13  | Plekha1             |
| Snord2   | Plekha1             |
| Snph     | Plekha1             |
| Snrp70   | Plekha1             |



|         |                  |
|---------|------------------|
| Snrpb   | Ppp1r3a          |
| Snrpd3  | Ppp1r3c          |
| Snrpe   | Ppp1r42          |
| Snrpn   | Ppp1r8           |
| Sntb1   | Ppp2cb           |
| Sntg2   | Ppp2r1a          |
| Snupn   | Ppp2r2a          |
| Snx11   | Ppp2r2b          |
| Snx13   | Ppp2r2c          |
| Snx14   | Ppp2r3c          |
| Snx16   | Ppp2r3d          |
| Snx17   | Ppp2r4           |
| Snx24   | Ppp2r5b          |
| Snx32   | Ppp2r5c          |
| Snx5    | Ppp3cb           |
| Snx7    | Ppp3cc           |
| Soat1   | Ppp3r2           |
| Socs1   | Ppp4r2           |
| Socs3   | Ppp5c            |
| Sod1    | Ppp6r2           |
| Son     | Ppp6r3           |
| Sorbs1  | Pprc1            |
| Sorcs2  | Ppt1             |
| Sos1    | Ppt2             |
| Sost    | Ppy              |
| Sowahb  | Ppyr1            |
| Sox12   | Pqbp1            |
| Sox13   | Praf2            |
| Sox4    | Pramel6          |
| Sox6    | Pramel7          |
| Sox9    | Prap1            |
| Sp1     | Prcp             |
| Sp110   | Prdm1            |
| Sp2     | Prdm4            |
| Sp4     | Prdm5            |
| Sp6     | Prdx3            |
| Sp7     | Prdx4            |
| Sp8     | Preb             |
| Spaca3  | Prelid1          |
| Spag5   | Prelid2          |
| Spag7   | Prelp            |
| Spag9   | Prep             |
| Sparc   | Prepl            |
| Spata13 | Prg2             |
| Spata20 | Prg3             |
| Spata5  | Prg4             |
| Spats2  | Prickle1         |
| Spef1   | Prickle4///Tomm6 |
| Speg    | Prim1            |
| Spen    | Prima1           |
| Spg21   | Prkaa2           |
| Sphk1   | Prkab1           |
| Spib    | Prkacb           |
| Spin4   | Prkar1a          |
| Spinkl  | Prkar1b          |
| Spint1  | Prkca            |
| Spire2  | Prkcb            |
| Spna2   | Prkcb1           |
| Spnb1   | Prkcdbp          |
| Spnb3   | Prkce            |
| Spns1   | Prkcg            |
| Spp3    | Prkci            |
| Spred-2 | Prkd1            |
| Spred2  | Prkd3            |
| Spry2   | Prkg1            |
| Spsb1   | Prkg2            |
| Spsb2   | Prkrir           |
| Sptlc1  | Prl2a1           |
| Spty2d1 | Prl3a1           |
| Sqle    | Prl3c1           |
| Sqstm1  | Prl3d1///Prl3d2  |
| Srbd1   | Prl4a1           |
| Srcrb4d | Prl6a1           |
| Srf     | Prl7a2           |
| Srgap2  | Prl7d1           |
| Srgap3  | Prl8a2           |
| Srp19   | Prl8a6           |
| Srp68   | Prl8a9           |
| Srp9    | Prlr             |
| Srp2    | Prrm1            |
| Srrm1   | Prrm2            |
| Srsf3   | Prrm3            |
| Ss18    | Prrmt1           |
| Ss18l1  | Prrmt2           |
| Ssbp3   | Prrmt3           |
| Ssbp4   | Prrmt5           |
| Ssfa2   | Prrmt6           |
| Ssh2    | Prrn///Prnd      |
| Ssh3    | Procr            |
| Ssrp1   | Prok2            |
| Sssca1  | Prokr1           |
| Sstr3   | Prol1            |
| St13    | Prom1            |
| St3gal1 | Prop1            |
| St3gal3 | Prosl            |
| St3gal4 | Prosc            |
| St3gal5 | Proser2          |
| St6gal1 | Proz             |
| St7     | Prpf19           |
| St8sia3 | Prpf31           |
| Stac2   | Prpf38b          |
| Stag1   | Prpf39           |
| Stam2   | Prpf4b           |
| Stap1   | Prpf6            |
| Stard10 | Prph             |
| Stard13 | Prpmp5           |
| Stard3  | Prr15            |
| Stat1   | Prr16            |
| Stat3   | Prr5             |
| Stat5A  | Prrc1            |
| Stat5a  | Prrc2a           |
| Stat5b  | Prrg2            |
| Stat6   | Prrt1            |
| Stau1   | Prrx1            |
| Stc2    | Prrx2            |
| Steap2  | Prss12           |
| Stim2   | Prss2            |
| Stip1   | Prss21           |
| Stk10   | Prss22           |
| Stk11ip | Prss23os         |
| Stk25   | Prss28           |
| Stk36   | Prss29           |
| Stk38   | Prss3            |
| Stk38l  | Prss30           |
| Stk39   | Prss32           |
| Stk40   | Prss35           |
| Stoml1  | Prss37           |
| Stoml2  | Prss39           |
| Ston2   | Prss44           |
| Stra13  | Prss58           |
| Stra6   | Prtg             |
| Strbp   | Prtn3            |
| Strn    | Prune            |
| Strn3   | Prx              |
| Strn4   | Psap             |
| Stt3a   | Pscdbp           |
| Stt3b   | Psd2             |
| Stx12   | Psd3             |
| Stx16   | Psen2            |
| Stx17   | Psg-ps1          |
| Stx18   | Psg16            |
| Stx3    | Psg17            |
| Stx6    | Psg18            |
| Stxbp1  | Psg19            |
| Stxbp3a | Psg23            |
| Stxbp4  | Psip1            |
| Styk1   | Psma1            |
| Sucla1  | Psma5            |
| Suclg1  | Psma6            |

|               |         |
|---------------|---------|
| Suclg2        | Psma8   |
| Sufu          | Psemb10 |
| Sulf1         | Psemb7  |
| Sulf2         | Psmc1   |
| Sult1a1       | Psmc3   |
| Sult1c2       | Psmc3ip |
| Sult2a5       | Psmc4   |
| Sumo1         | Psmc5   |
| Sumo3         | Psmc11  |
| Supl15h       | Psmc4   |
| Supt16h       | Psmc6   |
| Supt5h        | Psmc7   |
| Supt6h        | Psmc3   |
| Susd3         | Psmc4   |
| Suv420h1      | Psmf1   |
| Suv420h2      | Pspc1   |
| Suz12         | Psph    |
| Sv2c          | Pspn    |
| Syf2          | Psrc1   |
| Syk           | Pstpip2 |
| Syn3          | Ptafr   |
| Syne2         | Ptbp1   |
| Syngr2        | Ptbp2   |
| Syngr3        | Ptcd1   |
| Synj1         | Ptch1   |
| Synj2bp       | Ptch2   |
| Synrg         | Ptchd4  |
| Sypl2         | Ptdss2  |
| Syt12         | Pten    |
| Syt3          | Pter    |
| Syt6          | Ptf1a   |
| Syt7          | Ptldr2  |
| TACC3         | Ptgds   |
| TAF6          | Ptgds2  |
| TAGLN3        | Ptger3  |
| TANK          | Ptger4  |
| TAPBP         | Ptges   |
| TBC1D22B      | Ptges2  |
| TCF7L1///TCF3 | Ptgfr   |
| TECPR1        | Ptgfrn  |
| THADA         | Ptgir   |
| TIP5          | Ptgis   |
| TIPR          | Ptgr2   |
| TIPRL         | Ptgs1   |
| TLN1          | Ptgs2   |
| TLR1          | Pth     |
| TLR10         | Pth1r   |
| TMEFF2        | Pth2r   |
| TMEM179B      | Ptk2    |
| TMEM205       | Ptk6    |
| TMEM39A       | Ptk7    |
| TMEM69        | Ptms    |
| TMEM79        | Ptov1   |
| TMF1          | Ptp4a2  |
| TMSB4X        | Ptpla   |
| TNFAIP3       | Ptplad2 |
| TNFRSF10B     | Ptpn1   |
| TNFSF9        | Ptpn11  |
| TNPO3         | Ptpn12  |
| TNRC6B        | Ptpn18  |
| TOX4///LCP1   | Ptpn2   |
| TPD52L1       | Ptpn20  |
| TRAF1         | Ptpn4   |
| TRAF5         | Ptpn5   |
| TRIM34        | Ptpn6   |
| TRIM44        | Ptpn9   |
| TRIP10        | Ptprb   |
| TSLP          | Ptprc   |
| TUBB          | Ptprcap |
| TUBG1         | Ptprd   |
| TWF2          | Ptpre   |
| TXNIP         | Ptprg   |
| Tac4          | Ptprj   |
| Tacc1         | Ptprk   |
| Tacc2         | Ptprm   |
| Tacc3         | Ptprn   |
| Tada3l        | Ptpro   |
| Taf12         | Ptprr   |
| Taf15         | Ptprs   |
| Taf1c         | Ptprt   |
| Taf3          | Ptpru   |
| Taf4a         | Ptprz1  |
| Taf5          | Ptrf    |
| Taf5l         | Ptrh1   |
| Taf7          | Pttg1   |
| Tal1          | Pttg1ip |
| Tanc1         | Ptx3    |
| Tanc2         | Pura    |
| Tank          | Purg    |
| Taok1         | Pus3    |
| Taok2         | Pus7    |
| Tap1          | Pvalb   |
| Tap2          | Pvr     |
| Tapbp         | Pvri3   |
| Tapbpl        | Pvri4   |
| Tardbp        | Pvt1    |
| Tatdn3        | Pxk     |
| Tax1bp3       | Pycr1   |
| Tbc1d1        | Pycr2   |
| Tbc1d10b      | Pycl    |
| Tbc1d16       | Pygl    |
| Tbcd          | Pygm    |
| Tbk1          | Pyhin1  |
| Tbkbp1        | Pyroxd2 |
| Tbl3          | Pzp     |
| Tbp           | Qk      |
| Tbrg4         | Qpct    |
| Tbx1          | Qpctl   |
| Tbx15         | Qprt    |
| Tbx18         | Qrs1    |
| Tbx2          | Qsox1   |
| Tbx20         | Qtrt1   |
| Tbx21         | Qtrtd1  |
| Tbx3          | R74862  |
| Tbxas1        | RAB39B  |
| Tc2n          | RSPO4   |
| Tcam1         | RTL1    |
| Tcea1         | Rab11b  |
| Tcea3         | Rab12   |
| Tceal8        | Rab13   |
| Tceb1         | Rab14   |
| Tcerg1l       | Rab17   |
| Tcf12         | Rab18   |
| Tcf15         | Rab1b   |
| Tcf19         | Rab23   |
| Tcf20         | Rab24   |
| Tcf3          | Rab25   |
| Tcf4          | Rab27b  |
| Tcf7l2        | Rab28   |
| Tcfap2a       | Rab2a   |
| Tcfap2c       | Rab2b   |
| Tcfap2d       | Rab31   |
| Tcfap2e       | Rab32   |
| Tcfcp2        | Rab33a  |
| Tcn2          | Rab34   |
| Tcp1          | Rab3a   |
| Tcp11         | Rab3b   |
| Tcte1         | Rab3d   |
| Tcte2         | Rab3il1 |
| Tdrd1         | Rab40b  |
| Tdrd6         | Rab43   |
| Tdrd7         | Rab4a   |
| Tead1         | Rab4b   |
| Tead3         | Rab6a   |
| Tead4         | Rab6b   |
| Tec           | Rab7    |
| Tera          | Rab8b   |
| Terf2ip       | Rabac1  |
| Tes           | Rabep1  |

|             |                                            |
|-------------|--------------------------------------------|
| Tesk1       | Rabgap1                                    |
| Tesk2       | Rabgap1l                                   |
| Tessp2      | Rabl3                                      |
| Tet1        | Rabl6                                      |
| Tex14       | Rac1                                       |
| Tex19       | Rac2                                       |
| Tex2        | Rad18                                      |
| Tex21       | Rad23a                                     |
| Tfdp2       | Rad50                                      |
| Tfg         | Rad51                                      |
| Tfrc        | Rad51ap1                                   |
| Tgfb1       | Rad51b                                     |
| Tgfb1i1     | Rad51d                                     |
| Tgfb2       | Rad52                                      |
| Tgfb3       | Rad54l                                     |
| Tgfb3       | Rad9a                                      |
| Tgif1       | Rae1                                       |
| Tgm2        | Raet1a///Raet1b///Raet1c///Raet1d///Raet1e |
| Thada       | Raf1                                       |
| Thap2       | Rag1                                       |
| Thap3       | Rai1                                       |
| Thbs3       | Rai2                                       |
| Them2       | Rala                                       |
| Thns1       | Ralb                                       |
| Thra        | Ralgapa1                                   |
| Thrap2      | Ralgps2                                    |
| Thrap3      | Raly                                       |
| Thrap4      | Ramp2                                      |
| Thtpa       | Ramp3                                      |
| Thumpd3     | Ran                                        |
| Thy1        | Ranbp1                                     |
| Tia1        | Ranbp10                                    |
| Tial1       | Ranbp17                                    |
| Tiam1       | Rangrf                                     |
| Ticam1      | Rap1gds1                                   |
| Tigd3       | Rap2a                                      |
| Tigd4       | Rap2b                                      |
| Timm22      | Rapgef3                                    |
| Timm23      | Rapgef4                                    |
| Timp2       | Rarb                                       |
| Tinagl1     | Rarg                                       |
| Tinf2       | Rarres2                                    |
| Tipin       | Rasa1                                      |
| Titf1       | Rasa3                                      |
| Tjap1       | Rasa4                                      |
| Tjp2        | Rasal2                                     |
| Tk1         | Rasal3                                     |
| Tk2         | Rasd1                                      |
| Tlcd1       | Rasd2                                      |
| Tlk2        | Rasgrf1                                    |
| Tln1        | Rasgrp2                                    |
| Tlr3        | Rasip1                                     |
| Tlr5        | Rasl11b                                    |
| Tlx2        | Rasl2-9                                    |
| Tm4sf5      | Rassf1                                     |
| Tm7sf2      | Rassf2                                     |
| Tm7sf3      | Rassf3                                     |
| Tm9sf3      | Rassf5                                     |
| Tmc2        | Rassf7                                     |
| Tmc6        | Rassf8                                     |
| Tmc8        | Rassf9                                     |
| Tmcc1       | Rbbp4                                      |
| Tmcc3       | Rbbp6                                      |
| Tmco4       | Rbfox1                                     |
| Tmco6       | Rbfox2                                     |
| Tmed4       | Rbks                                       |
| Tmed5       | Rbm12                                      |
| Tmed8       | Rbm14                                      |
| Tmeff2      | Rbm14-rbm4///Rbm4                          |
| Tmem102     | Rbm18                                      |
| Tmem106a    | Rbm25                                      |
| Tmem107     | Rbm26                                      |
| Tmem109     | Rbm35a                                     |
| Tmem11      | Rbm35b                                     |
| Tmem111     | Rbm39                                      |
| Tmem115     | Rbm42                                      |
| Tmem120a    | Rbm47                                      |
| Tmem120b    | Rbm4b                                      |
| Tmem123     | Rbm5                                       |
| Tmem129     | Rbm6                                       |
| Tmem132a    | Rbms1                                      |
| Tmem132c    | Rbms2                                      |
| Tmem138     | Rbms3                                      |
| Tmem140     | Rbmx                                       |
| Tmem141     | Rbp1                                       |
| Tmem144     | Rbp2                                       |
| Tmem145     | Rbp3                                       |
| Tmem149     | Rbp4                                       |
| Tmem150c    | Rbp7                                       |
| Tmem161a    | Rbpj                                       |
| Tmem161b    | Rbpjl                                      |
| Tmem162     | Rbpms                                      |
| Tmem168     | Rc3h2                                      |
| Tmem16f     | Rcan1                                      |
| Tmem16j     | Rcan2                                      |
| Tmem170     | Rcan3                                      |
| Tmem180     | Rcbtb1                                     |
| Tmem181b-ps | Rcbtb2                                     |
| Tmem19      | Rcc1                                       |
| Tmem211     | Rccd1                                      |
| Tmem225     | Rcl1                                       |
| Tmem24      | Rcn1                                       |
| Tmem28      | Rcn2                                       |
| Tmem30b     | Rcn3                                       |
| Tmem33      | Rcvrn                                      |
| Tmem43      | Rd3                                        |
| Tmem46      | Rdh10                                      |
| Tmem49      | Rdh14                                      |
| Tmem50a     | Rdh16                                      |
| Tmem51      | Reck                                       |
| Tmem55a     | Recql                                      |
| Tmem59l     | Reep1                                      |
| Tmem63a     | Reep3                                      |
| Tmem63b     | Reep5                                      |
| Tmem66      | Reep6                                      |
| Tmem70      | Reg2                                       |
| Tmem79      | Reg3a                                      |
| Tmem82      | Reg3b                                      |
| Tmem87a     | Reg3d                                      |
| Tmem88      | Rel1                                       |
| Tmem91      | Reln                                       |
| Tmem93      | Ren1                                       |
| Tmem98      | Ren1///Ren2                                |
| Tmod3       | Renbp                                      |
| Tmod4       | Rep15                                      |
| Tmpo        | Repin1                                     |
| Tmprss5     | Rerg                                       |
| Tmsb4x      | Rest                                       |
| Tmtc1       | Ret                                        |
| Tmtc2       | Retnla                                     |
| Tmtc3       | Retnlb                                     |
| Tmx4        | Rev1                                       |
| Tnfai2      | Rev3l                                      |
| Tnfai8      | Rex2                                       |
| Tnfai8l3    | Rexo1                                      |
| Tnfrsf19    | Rffl                                       |
| Tnfrsf1a    | Rfk                                        |
| Tnfrsf25    | Rfng                                       |
| Tnfsf13b    | Rfpl4                                      |
| Tnfsf15     | Rftn2                                      |
| Tnfsf9      | Rfx3                                       |
| Tnip1       | Rfxank                                     |
| Tnk1        | Rgl1                                       |
| Tnk2        | Rgl3                                       |
| Tnks        | Rgn                                        |
| Tnks1bp1    | Rgnef                                      |
| Tnks2       | Rgs1                                       |
| Tnpo1       | Rgs10                                      |
| Tnpo3       | Rgs16                                      |

|          |                    |
|----------|--------------------|
| Tnrc5    | Rgs17              |
| Tnrc6a   | Rgs18              |
| Tnrc6b   | Rgs19              |
| Tob1     | Rgs2               |
| Tob2     | Rgs3               |
| Tom1l2   | Rgs4               |
| Tom40    | Rgs5               |
| Tomm22   | Rgs6               |
| Tomm40   | Rgs7               |
| Top2a    | Rgs7bp             |
| Top2b    | Rgs8               |
| Top3a    | Rhag               |
| Top3b    | Rhbdd2             |
| Tor1a    | Rhbdd3             |
| Tor1aip1 | Rhbdf1             |
| Tor1aip2 | Rhbdl3             |
| Tox      | Rhbg               |
| Tox2     | Rhcg               |
| Tox4     | Rhd                |
| Tpbg     | Rho                |
| Tpcn2    | Rhoa               |
| Tpd52    | Rhob               |
| Tpi1     | Rhoc               |
| Tpm1     | Rhoh               |
| Tpm2     | Rhoj               |
| Tpm3     | Rhoq               |
| Tpm4     | Rhot2              |
| Tpp2     | Rhou               |
| Tpst2    | Rhox2a///Rhox2e    |
| Tpte     | Rhox4b             |
| Tpx2     | Rhox5              |
| Tra2a    | Rhox6              |
| Tra2b    | Rhpn1              |
| Traf2    | Rian               |
| Traf4    | Rian///Rian///Rian |
| Traf5    | Rictor             |
| Traf6    | Rilpl1             |
| Traits   | Rilpl2             |
| Trak1    | Rimklb             |
| Trak2    | Rims2              |
| Trappc3  | Rin2               |
| Trappc4  | Riok1              |
| Trappc5  | Riok2              |
| Trem3    | Ripk1              |
| Trem14   | Ripk3              |
| Trerf1   | Ripk4              |
| Trh      | Ripply3            |
| Trhr2    | Rit1               |
| Trib1    | Rit2               |
| Trib3    | Rilbp1             |
| Trim14   | Rlim               |
| Trim17   | Rln1               |
| Trim2    | Rmdn1              |
| Trim21   | Rmst               |
| Trim23   | Rnase2b            |
| Trim26   | Rnaseh2c           |
| Trim31   | Rnasel             |
| Trim34a  | Rnd3               |
| Trim36   | Rnf10              |
| Trim37   | Rnf11              |
| Trim39   | Rnf112             |
| Trim41   | Rnf114             |
| Trim44   | Rnf121             |
| Trim45   | Rnf128             |
| Trim54   | Rnf138             |
| Trim56   | Rnf138rt1          |
| Trim7    | Rnf141             |
| Trim71   | Rnf144a            |
| Trim8    | Rnf144b            |
| Trio     | Rnf146             |
| Triobp   | Rnf151             |
| Trip10   | Rnf157             |
| Trip12   | Rnf17              |
| Trip4    | Rnf183             |
| Trip6    | Rnf186             |
| Trm6     | Rnf187             |
| Trmt2a   | Rnf19b             |
| Trmt5    | Rnf2               |
| Trmt6    | Rnf20              |
| Troap    | Rnf207             |
| Trove2   | Rnf214             |
| Trp2     | Rnf219             |
| Trp53    | Rnf25              |
| Trp53bp1 | Rnf41              |
| Trp53i11 | Rnf43              |
| Trp53i13 | Rnf5               |
| Trpc2    | Rnf8               |
| Trpc5    | Rnft1              |
| Trpc7    | Rngtt              |
| Trpm7    | Rnpc3              |
| Trpv3    | Rnpep              |
| Trub1    | Rnps1              |
| Tsarg7   | Robo1              |
| Tsc22d1  | Robo3              |
| Tsc22d4  | Rock1              |
| Tsen54   | Rock2              |
| Tsfn     | Rom1               |
| Tsg101   | Ropn1              |
| Tsga10   | Ropn1l             |
| Tshz1    | Ror1               |
| Tshz2    | Ror2               |
| Tspan12  | Rora               |
| Tspan13  | Rorb               |
| Tspan31  | Rorc               |
| Tspan33  | Ros1               |
| Tspan9   | Rp1                |
| Tspyl3   | Rp2h               |
| Tssk3    | Rpe65              |
| Tst      | Rpgrip1            |
| Ttbk2    | Rpl12              |
| Ttc1     | Rpl18              |
| Ttc13    | Rpl27a             |
| Ttc23    | Rpl35              |
| Ttc3     | Rpl37a             |
| Ttc39b   | Rpl39l             |
| Ttc4     | Rpl3l              |
| Ttc5     | Rpl41              |
| Ttf1     | Rpl7               |
| Ttf2     | Rpn1               |
| Ttk      | Rpn2               |
| Ttll10   | Rpp25              |
| Ttll13   | Rpp30              |
| Ttll3    | Rprd1a             |
| Ttll4    | Rprd1b             |
| Ttpal    | Rprd2              |
| Ttrap    | Rprm               |
| Ttyh2    | Rps10              |
| Tuba1a   | Rps15              |
| Tuba1b   | Rps15a-ps6         |
| Tuba1c   | Rps18              |
| Tuba3b   | Rps24              |
| Tuba4a   | Rps27              |
| Tuba8    | Rps4l              |
| Tubb3    | Rps6               |
| Tubb4    | Rps6ka2            |
| Tubd1    | Rps6ka5            |
| Tubg1    | Rps6kc1            |
| Tubgcp6  | Rps6kl1            |
| Tufm     | Rps9               |
| Tulp2    | Rpsa               |
| Tulp3    | Rptn               |
| Tulp4    | Rpusd1             |
| Tusc2    | Rrad               |
| Tusc3    | Rragb              |
| Tusc4    | Rragd              |
| Tut1     | Rras               |
| Twf1     | Rrbp1              |
| Txn1     | Rrh                |
| Txnip    | Rrnad1             |

|             |                    |
|-------------|--------------------|
| Txn1        | Rrp12              |
| Txnrd1      | Rrp1b              |
| Txnrd3      | Rrp36              |
| Tysnd1      | Rrp8               |
| U1          | Rrp9               |
| U2          | Rrs1               |
| U20366      | Rsad2              |
| U20367      | Rsph1              |
| U20369      | Rsph6a             |
| U2af114     | Rsph9              |
| U2af2       | Rspo1              |
| U2af26      | Rspo2              |
| U5          | Rspo3              |
| U6          | Rsrc1              |
| U6atac      | Rsrc2              |
| U7          | Rsrp1              |
| U83174      | Rsu1               |
| U83175      | Rtbdn              |
| UBR2        | Rtcb               |
| UCP2        | Rtfdc1             |
| UFM1        | Rtkn2              |
| UQCRC2      | Rtn1               |
| UTP18       | Rtn2               |
| Uap1        | Rtn3               |
| Ubap2       | Rtn4               |
| Ubap2l      | Rtn4ip1            |
| Ubb         | Rtp3               |
| Ubc         | Rtp4               |
| Ube1l       | Rufy1              |
| Ube2b       | Rufy2              |
| Ube2d3      | Rufy3              |
| Ube2e1      | Rundc3a            |
| Ube2e2      | Runx1              |
| Ube2g1      | Runx1t1            |
| Ube2g2      | Runx2              |
| Ube2l3      | Runx3              |
| Ube2l6      | Rusc1              |
| Ube2q1      | Rusc2              |
| Ube2r2      | Rwdd3              |
| Ube2v1      | Rwdd4a             |
| Ube2z       | Rxfp2              |
| Ube4b       | Rxrg               |
| Ubl5        | Ryk                |
| Ubn1        | Ryr2               |
| Ubp1        | S100a1             |
| Ubr1n2      | S100a13            |
| Ubr2        | S100a14            |
| Ubr5        | S100a16            |
| Ubt1        | S100a3             |
| Ubt2        | S100a4             |
| Ubt4        | S100a6             |
| Ubx4        | S100a8             |
| Uch5        | S100a9             |
| Uck2        | S100b              |
| Ucn         | S100g              |
| Ucp2        | S100ppp            |
| Ugt2b38     | S1pr1              |
| Ugt2b5      | S1pr3              |
| Uhrf1       | SCARA5             |
| Uimc1       | SCUBE2             |
| Unc13a      | SLC26A6            |
| Unc13b      | SLC5A7             |
| Unc45b      | STAT2              |
| Unc5c       | Saa1               |
| Unc93a      | Saa2               |
| Unc93b1     | Saa3               |
| Unk         | Saa4               |
| Upf2        | Saal1              |
| Upp1        | Sac3d1             |
| Uqcc        | Sacs               |
| Uqcrh       | Sall1              |
| Urm1        | Sall2              |
| Usf1        | Sall4              |
| Usf2        | Samd14             |
| Usmg5       | Samd4              |
| Usp12       | Samhd1             |
| Usp13       | Samsn1             |
| Usp14       | Samt3              |
| Usp18       | Samt4              |
| Usp19       | Sap30bp            |
| Usp20       | Sapcd1             |
| Usp21       | Sar1a              |
| Usp25       | Sardh              |
| Usp33       | Sarnp              |
| Usp34       | Sars2              |
| Usp39       | Sart3              |
| Usp46       | Sash1              |
| Usp47       | Sat2               |
| Usp48       | Satb1              |
| Usp49       | Satb2              |
| Usp5        | Sav1               |
| Usp1        | Sbf2               |
| Ust         | Sbp///Sbpl         |
| Utp11l      | Sbsn               |
| Utp15       | Sc5d               |
| Utp20       | Scaf11             |
| Utrn        | Scaf4              |
| Uts2r       | Scamp3             |
| Uvrag       | Scamp5             |
| V1rf5       | Scara3             |
| VEGFA       | Scara5             |
| VNN2        | Scarb1             |
| VPREB3      | Sccpdh             |
| VRHO        | Scd1               |
| Vamp1       | Scd2               |
| Vamp2       | Scd3               |
| Vamp5       | Scel               |
| Vamp8       | Scfd1              |
| Vangl2      | Scg2               |
| Vapa        | Scg3               |
| Vars        | Scgb1b27           |
| Vars2       | Scgb2b20///Scgb2b7 |
| Vasn        | Scgb3a2            |
| Vasp        | Scnl4              |
| Vat1        | Scn10a             |
| Vav1        | Scn1a              |
| Vav2        | Scn1b              |
| Vav3        | Scn2a1             |
| Vax1        | Scn3a              |
| Vax2        | Scn3b              |
| Vcan        | Scn4b              |
| Vcp         | Scn7a              |
| Vcpip1      | Scn8a              |
| Vdac1       | Scn9a              |
| Vdac2       | Scoc               |
| Vegf        | Scpep1             |
| Vegfa       | Scrn2              |
| Vegfc       | Scrn3              |
| VeZF1       | Scrt1              |
| Vgll4       | Sct                |
| Vhlh        | Scube1             |
| Vil1        | Scube3             |
| Vmn1r-ps2   | Scyl1              |
| Vmn1r6      | Sdad1              |
| Vmn2r-ps118 | Sdc1               |
| Vmn2r-ps131 | Sdc2               |
| Vmn2r121    | Sdc3               |
| Vmn2r90     | Sdcbp              |
| Vpreb1      | Sdccag3            |
| Vps11       | Sdccag8            |
| Vps13a      | Sdf2l1             |
| Vps13c      | Sdf4               |
| Vps18       | Sdhaf1             |
| Vps25       | Sdk2               |
| Vps29       | Sdpr               |
| Vps33a      | Sds                |
| Vps35       | Sec1               |
| Vps37b      | Sec13              |
| Vps72       | Sec14l1            |

|         |                                   |        |
|---------|-----------------------------------|--------|
| Vps8    | Sec14I4                           |        |
| Vrk3    | Sec16b                            |        |
| Vsig2   | Sec22b                            |        |
| Vsig8   | Sec23a                            |        |
| Vstm2b  | Sec24d                            |        |
| Vwa1    | Sec31a                            |        |
| Vwa3b   | Sec61a1                           |        |
| Vwa5a   | Sec61a2                           |        |
| WDR5    | Sec61b                            |        |
| WDR54   | Sec62                             |        |
| WFDC5   | Sec63                             |        |
| WIBG    | Secisbp2l                         |        |
| WIPF1   | Sectm1a                           |        |
| Wapal   | Seh1l                             |        |
| Wbp1    | Sel1l                             |        |
| Wbscr16 | Sel1l2                            |        |
| Wbscr17 | Sel1l3                            |        |
| Wdfy2   | Sele                              |        |
| Wdr1    | Selenbp1                          |        |
| Wdr27   | Sell                              |        |
| Wdr33   | Selm                              |        |
| Wdr34   | Selp                              |        |
| Wdr35   | Selpg                             |        |
| Wdr36   | Sema3a                            |        |
| Wdr37   | Sema3b                            |        |
| Wdr38   | Sema3e                            |        |
| Wdr40a  | Sema3f                            |        |
| Wdr42a  | Sema3g                            |        |
| Wdr46   | Sema4a                            |        |
| Wdr47   | Sema4d                            |        |
| Wdr5    | Sema5a                            |        |
| Wdr53   | Sema5b                            |        |
| Wdr55   | Sema6a                            |        |
| Wdr59   | Sema6b                            |        |
| Wdr60   | Sema6c                            |        |
| Wdr61   | Sema6d                            |        |
| Wdr63   | Sema7a                            |        |
| Wdr67   | Senp2                             |        |
| Wdr68   | Senp6                             |        |
| Wdr7    |                                   | Sep-02 |
| Wdr73   |                                   | Sep-04 |
| Wdr75   |                                   | Sep-06 |
| Wdr76   |                                   | Sep-07 |
| Wdr79   |                                   | Sep-08 |
| Wdr85   |                                   | Sep-11 |
| Wdtc1   |                                   | Sep-15 |
| Wdvcf   | Sephs2                            |        |
| Wee2    | Sepn1                             |        |
| Wfdc2   |                                   | Sep-03 |
| Whdc1   | Sepw1                             |        |
| Whrn    | Serf1                             |        |
| Whsc1   | Serhl                             |        |
| Whsc1l1 | Serinc1                           |        |
| Wibg    | Serinc3                           |        |
| Wipf2   | Serinc4                           |        |
| Wls     | Serp1                             |        |
| Wnk1    | Serpina10                         |        |
| Wnk4    | Serpina12                         |        |
| Wnt10a  | Serpina1b                         |        |
| Wnt11   | Serpina1b///Serpina1c///Serpina1e |        |
| Wnt2b   | Serpina3a                         |        |
| Wnt3    | Serpina3c                         |        |
| Wnt3a   | Serpina3k                         |        |
| Wnt5a   | Serpina3m                         |        |
| Wnt5b   | Serpina5                          |        |
| Wnt6    | Serpina6                          |        |
| Wnt7a   | Serpinb1a                         |        |
| Wnt8b   | Serpinb2                          |        |
| Wnt9a   | Serpinb5                          |        |
| Wnt9b   | Serpinb8                          |        |
| Wsb2    | Serpinb9                          |        |
| Wscd2   | Serpinb9b                         |        |
| Wt1     | Serpinb9c                         |        |
| XAB2    | Serpinc1                          |        |
| XRCC5   | Serpind1                          |        |
| XRCC6   | Serpine1                          |        |
| Xaf1    | Serpine2                          |        |
| Xiap    | Serpinf1                          |        |
| Xkr6    | Serpinf2                          |        |
| Xkr7    | Serping1                          |        |
| Xpc     | Serpinh1                          |        |
| Xpnpep3 | Serpinl1                          |        |
| Xpo4    | Serpinl2                          |        |
| Xpo5    | Sertad2                           |        |
| Xrcc6   | Sertad3                           |        |
| Xrn2    | Sesn3                             |        |
| Xtrp3s1 | Set                               |        |
| YWHAH   | Setd1a                            |        |
| YWHAQ   | Setd4                             |        |
| Yap1    | Setd7                             |        |
| Ybx1    | Setdb1                            |        |
| Ybx2    | Sez6                              |        |
| Yes1    | Sez6l                             |        |
| Yif1a   | Sf1                               |        |
| Yme1l1  | Sf3a1                             |        |
| Yod1    | Sf3a3                             |        |
| Ypel3   | Sf3b2                             |        |
| Ypel4   | Sf3b5                             |        |
| Ypel5   | Sfmbt1                            |        |
| Ythdf1  | Sfmbt2                            |        |
| Ythdf2  | Sfpq                              |        |
| Ywhah   | Sfrp1                             |        |
| Ywhaz   | Sfrp2                             |        |
| ZDHHC4  | Sfrp5                             |        |
| ZFP36L1 | Sfswap                            |        |
| ZFP36L2 | Sftpa1                            |        |
| ZHX1    | Sfxn1                             |        |
| ZMAT3   | Sfxn3                             |        |
| ZNF385A | Sfxn4                             |        |
| ZNF516  | Sgca                              |        |
| ZNF597  | Sgcb                              |        |
| ZSCAN2  | Sgce                              |        |
| ZSCAN5A | Sgcg                              |        |
| Zadh1   | Sgip1                             |        |
| Zadh2   | Sgk1                              |        |
| Zap70   | Sgk3                              |        |
| Zbtb1   | Sgol1                             |        |
| Zbtb16  | Sgpl1                             |        |
| Zbtb17  | Sgpp1                             |        |
| Zbtb22  | Sgsh                              |        |
| Zbtb25  | Sgta                              |        |
| Zbtb26  | Sgtb                              |        |
| Zbtb4   | Sh2b2                             |        |
| Zbtb5   | Sh2b3                             |        |
| Zbtb6   | Sh2d1b1//Sh2d1b2                  |        |
| Zbtb7b  | Sh2d2a                            |        |
| Zbtb9   | Sh2d3c                            |        |
| Zc3h10  | Sh3bgr                            |        |
| Zc3h11a | Sh3bgrl                           |        |
| Zc3h12a | Sh3bgrl2                          |        |
| Zc3h7b  | Sh3bp5                            |        |
| Zc3hav1 | Sh3d19                            |        |
| Zc3hc1  | Sh3gl2                            |        |
| Zcchc10 | Sh3gl3                            |        |
| Zcchc11 | Sh3kbp1                           |        |
| Zcchc2  | Sh3pxd2a                          |        |
| Zcchc3  | Sh3tc1                            |        |
| Zcchc6  | Sh3yl1                            |        |
| Zcchc7  | Shank2                            |        |
| Zcchc8  | Shank3                            |        |
| Zcwpw1  | Shbg                              |        |
| Zdhhc21 | Shc1                              |        |
| Zdhhc5  | Shc2                              |        |
| Zfhx2   | Shc3                              |        |
| Zfhx3   | Shd                               |        |
| Zfhx4   | She                               |        |
| Zfp113  | Shh                               |        |
| Zfp13   | Shisa9                            |        |
| Zfp142  | Shmt1                             |        |

|                        |                     |
|------------------------|---------------------|
| Zfp143                 | Shmt2               |
| Zfp148                 | Shoc2               |
| Zfp160                 | Shox2               |
| Zfp184                 | Shroom1             |
| Zfp191                 | Shroom3             |
| Zfp202                 | Si                  |
| Zfp206                 | Siae                |
| Zfp219                 | Siah2               |
| Zfp238                 | Sidt1               |
| Zfp239                 | Sigirr              |
| Zfp259                 | Siglec1             |
| Zfp260                 | Siglec5             |
| Zfp277                 | Sike1               |
| Zfp296                 | Sim2                |
| Zfp3                   | Simc1               |
| Zfp318                 | Sipa1               |
| Zfp322a                | Sirpa               |
| Zfp329                 | Sirt2               |
| Zfp335                 | Sirt4               |
| Zfp341                 | Sit1                |
| Zfp346                 | Siva1               |
| Zfp36                  | Six1                |
| Zfp364                 | Six2                |
| Zfp3611                | Six3                |
| Zfp385                 | Six4                |
| Zfp39                  | Six6                |
| Zfp395                 | Ska1                |
| Zfp407                 | Skap2               |
| Zfp408                 | Skil                |
| Zfp410                 | Skiv2l              |
| Zfp422-rs1             | Skp2                |
| Zfp426                 | Sla                 |
| Zfp444                 | Slain1              |
| Zfp46                  | Slamf1              |
| Zfp462                 | Slamf6              |
| Zfp469                 | Slamf7              |
| Zfp472                 | Slbp                |
| Zfp473                 | Slc10a6             |
| Zfp496                 | Slc11a2             |
| Zfp503                 | Slc12a1             |
| Zfp51                  | Slc12a2             |
| Zfp516                 | Slc12a3             |
| Zfp521                 | Slc12a5             |
| Zfp526                 | Slc12a7             |
| Zfp533                 | Slc12a8             |
| Zfp553                 | Slc13a1             |
| Zfp566                 | Slc13a3             |
| Zfp592                 | Slc14a1             |
| Zfp598                 | Slc14a2             |
| Zfp60                  | Slc15a2             |
| Zfp607                 | Slc16a1             |
| Zfp608                 | Slc16a12            |
| Zfp609                 | Slc16a2             |
| Zfp617                 | Slc16a3             |
| Zfp62                  | Slc16a7             |
| Zfp646                 | Slc16a8             |
| Zfp650                 | Slc17a1             |
| Zfp652                 | Slc17a2             |
| Zfp653                 | Slc17a3             |
| Zfp664                 | Slc17a9             |
| Zfp668                 | Slc18a1             |
| Zfp672                 | Slc19a1             |
| Zfp687                 | Slc19a2             |
| Zfp689                 | Slc1a1              |
| Zfp692                 | Slc1a2              |
| Zfp710                 | Slc1a3              |
| Zfp748                 | Slc1a4              |
| Zfp758                 | Slc1a5              |
| Zfp768                 | Slc20a1             |
| Zfp771                 | Slc20a2             |
| Zfp773                 | Slc22a12            |
| Zfp787                 | Slc22a13            |
| Zfp800                 | Slc22a17            |
| Zfp817                 | Slc22a18            |
| Zfp82                  | Slc22a19            |
| Zfp827                 | Slc22a21            |
| Zfp87                  | Slc22a26            |
| Zfp91                  | Slc22a27            |
| Zfp91-ctnf             | Slc22a29            |
| Zfp93                  | Slc22a29///Slc22a30 |
| Zfp943                 | Slc22a30            |
| Zfp97                  | Slc22a4             |
| Zfp1                   | Slc22a5             |
| Zfpm1                  | Slc22a6             |
| Zfr                    | Slc22a8             |
| Zfyve16                | Slc23a1             |
| Zfyve20                | Slc23a2             |
| Zfyve26                | Slc24a1             |
| Zfyve9                 | Slc24a3             |
| Zgpat                  | Slc25a10            |
| Zhx2                   | Slc25a14            |
| Zhx3                   | Slc25a15            |
| Zic1                   | Slc25a19            |
| Zic2                   | Slc25a23            |
| Zic4                   | Slc25a25            |
| Zic5                   | Slc25a26            |
| Zkscan1                | Slc25a30            |
| Zkscan17               | Slc25a31            |
| Zkscan6                | Slc25a33            |
| Zmat5                  | Slc25a35            |
| Zmiz1                  | Slc25a36            |
| Zmynd10                | Slc25a39            |
| Zmynd11                | Slc25a4             |
| Znf202                 | Slc25a45            |
| Znf710                 | Slc25a51            |
| Znhit1                 | Slc25a53            |
| Znhit4                 | Slc26a2             |
| Znrf1                  | Slc26a3             |
| Znrf3                  | Slc26a4             |
| Zp3                    | Slc26a6             |
| Zranb1                 | Slc26a7             |
| Zscan10                | Slc26a8             |
| Zscan12                | Slc27a2             |
| Zswim6                 | Slc27a3             |
| Zufsp                  | Slc28a3             |
| Zwilch                 | Slc29a2             |
| Zwint                  | Slc29a3             |
| Zyg11a                 | Slc29a4             |
| Zyg11b                 | Slc2a10             |
| abParts                | Slc2a2              |
| abca5                  | Slc2a3              |
| apo                    | Slc2a4              |
| asp4                   | Slc2a5              |
| bMRP64                 | Slc2a8              |
| cbp146                 | Slc2a9              |
| cbp82                  | Slc30a1             |
| evi-1                  | Slc30a2             |
| glp                    | Slc30a3             |
| hCG_1998957///HLA-DRB5 | Slc30a4             |
| hnRNP A2/B1            | Slc30a9             |
| hnRNP X                | Slc32a1             |
| if5                    | Slc34a1             |
| ire1 alpha             | Slc34a2             |
| isl1-beta              | Slc35a1             |
| lama3                  | Slc35a2             |
| limd1                  | Slc35a3             |
| mAF10                  | Slc35a5             |
| mFLJ00025              | Slc35b1             |
| mFLJ00088              | Slc35b2             |
| mFLJ00267              | Slc35b4             |
| mFLJ00277              | Slc35c1             |
| mFLJ00298              | Slc35c2             |
| mFLJ00369              | Slc35e4             |
| mKIAA0031              | Slc35f4             |
| mKIAA0044              | Slc35g3             |
| mKIAA0056              | Slc37a1             |
| mKIAA0097              | Slc37a3             |
| mKIAA0157              | Slc37a4             |
| mKIAA0174              | Slc38a10            |

|                |                          |
|----------------|--------------------------|
| mKIAA0195      | Slc38a3                  |
| mKIAA0230      | Slc39a14                 |
| mKIAA0236      | Slc39a7                  |
| mKIAA0306      | Slc39a8                  |
| mKIAA0338      | Slc39a9                  |
| mKIAA0358      | Slc41a2                  |
| mKIAA0375      | Slc41a3                  |
| mKIAA0404      | Slc43a3                  |
| mKIAA0429      | Slc44a1                  |
| mKIAA0460      | Slc44a2                  |
| mKIAA0515      | Slc44a3                  |
| mKIAA0544      | Slc44a4                  |
| mKIAA0545      | Slc46a1                  |
| mKIAA0578      | Slc46a2                  |
| mKIAA0585      | Slc48a1                  |
| mKIAA0612      | Slc4a1                   |
| mKIAA0641      | Slc4a10                  |
| mKIAA0650      | Slc4a3                   |
| mKIAA0651      | Slc4a4                   |
| mKIAA0737      | Slc4a5                   |
| mKIAA0753      | Slc4a7                   |
| mKIAA0769      | Slc4a8                   |
| mKIAA0824      | Slc50a1                  |
| mKIAA0881      | Slc51a                   |
| mKIAA0885      | Slc52a2                  |
| mKIAA0892      | Slc5a1                   |
| mKIAA0893      | Slc5a2                   |
| mKIAA0904      | Slc5a3                   |
| mKIAA0909      | Slc5a4a                  |
| mKIAA0919      | Slc5a4b                  |
| mKIAA0933      | Slc5a5                   |
| mKIAA1026      | Slc5a7                   |
| mKIAA1027      | Slc5a8                   |
| mKIAA1039      | Slc6a1                   |
| mKIAA1102      | Slc6a12                  |
| mKIAA1108      | Slc6a14                  |
| mKIAA1125      | Slc6a15                  |
| mKIAA1178      | Slc6a17                  |
| mKIAA1180      | Slc6a18                  |
| mKIAA1188      | Slc6a2                   |
| mKIAA1238      | Slc6a3                   |
| mKIAA1281      | Slc6a5                   |
| mKIAA1294      | Slc6a6                   |
| mKIAA1376      | Slc6a9                   |
| mKIAA1380      | Slc7a10                  |
| mKIAA1382      | Slc7a11                  |
| mKIAA1386      | Slc7a12                  |
| mKIAA1417      | Slc7a13                  |
| mKIAA1441      | Slc7a2                   |
| mKIAA1506      | Slc7a3                   |
| mKIAA1609      | Slc7a4                   |
| mKIAA1612      | Slc7a5                   |
| mKIAA1707      | Slc7a7                   |
| mKIAA1721      | Slc8a1                   |
| mKIAA1724      | Slc8a2                   |
| mKIAA1726      | Slc8a3                   |
| mKIAA1737      | Slc9a3r2                 |
| mKIAA1741      | Slc9a8                   |
| mKIAA1745      | Slc9b1                   |
| mKIAA1757      | Slc9b2                   |
| mKIAA1766      | Slco1a1                  |
| mKIAA1823      | Slco1a4                  |
| mKIAA1835      | Slco1a5                  |
| mKIAA1921      | Slco1a6                  |
| mKIAA1971      | Slco1b2                  |
| mKIAA1973      | Slco1c1                  |
| mKIAA1981      | Slco2a1                  |
| mKIAA1998      | Slco4a1                  |
| mKIAA2006      | Slco4c1                  |
| mKIAA2037      | Slco5a1                  |
| mKIAA3014      | Sifn1                    |
| mKIAA3028      | Sifn4                    |
| mKIAA4020      | Slit1                    |
| mKIAA4026      | Slit2                    |
| mKIAA4029      | Slit3                    |
| mKIAA4075      | Slitrk1                  |
| mKIAA4106      | Slitrk5                  |
| mKIAA4110      | Slk                      |
| mKIAA4116      | SImap                    |
| mKIAA4123      | SImo1                    |
| mKIAA4163      | SIn                      |
| mKIAA4193      | Sipi                     |
| mKIAA4237      | Slu7                     |
| mSSH-2L        | Slurp1                   |
| mSSH-3L        | Six1b                    |
| mTOP3beta      | Smad3                    |
| mVAMP-1        | Smad6                    |
| mazr           | Smad9                    |
| mboct          | Smap1                    |
| meis2a         | Smarca1                  |
| mimp3          | Smarca4                  |
| mmu-let-7e     | Smarca5                  |
| mmu-mir-101a   | Smarcb1                  |
| mmu-mir-10a    | Smarcc1                  |
| mmu-mir-1186b  | Smarcd1                  |
| mmu-mir-1192   | Smarcd3                  |
| mmu-mir-1199   | Smc1a                    |
| mmu-mir-124-1  | Smc1b                    |
| mmu-mir-125a   | Smc3                     |
| mmu-mir-125b-2 | Smc5                     |
| mmu-mir-130a   | Smg5                     |
| mmu-mir-132    | Smim11                   |
| mmu-mir-135a-1 | Smo                      |
| mmu-mir-135b   | Smoc1                    |
| mmu-mir-146a   | Smoc2                    |
| mmu-mir-146b   | Smok3a///Smok3b///Smok3c |
| mmu-mir-15a    | Smox                     |
| mmu-mir-16-1   | Smpd3                    |
| mmu-mir-182    | Smpd4                    |
| mmu-mir-183    | Smpd5                    |
| mmu-mir-191    | Smpx                     |
| mmu-mir-193    | Smr2                     |
| mmu-mir-1931   | Smtnl1                   |
| mmu-mir-1934   | Smu1                     |
| mmu-mir-1946a  | Smyd1                    |
| mmu-mir-1949   | Smyd5                    |
| mmu-mir-195    | Snai1                    |
| mmu-mir-1955   | Snai2                    |
| mmu-mir-1960   | Snap23                   |
| mmu-mir-1966   | Snap29                   |
| mmu-mir-1967   | Snap47                   |
| mmu-mir-196a-1 | Snap91                   |
| mmu-mir-196a-2 | Snapc2                   |
| mmu-mir-196b   | Snapc3                   |
| mmu-mir-1983   | Snapc5                   |
| mmu-mir-212    | Snapin                   |
| mmu-mir-219-1  | Snca                     |
| mmu-mir-26b    | Sнцаip                   |
| mmu-mir-290    | Sncb                     |
| mmu-mir-291a   | Sncg                     |
| mmu-mir-291b   | Snd1                     |
| mmu-mir-292    | Sned1                    |
| mmu-mir-293    | Snhg1                    |
| mmu-mir-294    | Snhg11                   |
| mmu-mir-295    | Snhg5                    |
| mmu-mir-301a   | Snhg7                    |
| mmu-mir-3058   | Snn                      |
| mmu-mir-3064   | Snrk                     |
| mmu-mir-3078   | Snrnp27                  |
| mmu-mir-3089   | Snrnp40                  |
| mmu-mir-3093   | Snrnp70                  |
| mmu-mir-3098   | Snrpb                    |
| mmu-mir-3100   | Snrpb2                   |
| mmu-mir-324    | Snrpd3                   |
| mmu-mir-328    | Snrpn /// Snurf          |
| mmu-mir-3470a  | Snrpn///Snurf            |
| mmu-mir-365-2  | Snta1                    |
| mmu-mir-425    | Sntb1                    |
| mmu-mir-483    | Sntb2                    |



|                    |                 |
|--------------------|-----------------|
| mmu-mir-497        | Sntg1           |
| mmu-mir-615        | Snx15           |
| mmu-mir-670        | Snx19           |
| mmu-mir-671        | Snx2            |
| mmu-mir-702        | Snx20           |
| mmu-mir-706        | Snx21           |
| mmu-mir-709        | Snx30           |
| mmu-mir-761        | Snx4            |
| mmu-mir-762        | Snx5            |
| mmu-mir-7a-2       | Snx6            |
| mmu-mir-804        | Snx9            |
| mmu-mir-877        | Soat1           |
| mmu-mir-9-1        | Soat2           |
| mmu-mir-9-3        | Sobp            |
| mmu-mir-92b        | Socs1           |
| mmu-mir-96         | Socs2           |
| mmu-mir-99b        | Socs3           |
| mpp-GalNAc-T17(O6) | Socs4           |
| mt3-mmp            | Socs5           |
| muspaox            | Socs7           |
| myo 10             | Sod1            |
| n-R5s165           | Sod2            |
| n-R5s179           | Sod3            |
| n-R5s24            | Soga3           |
| n-R5s46            | Son             |
| n-R5s86            | Sorbs1          |
| netrin-G1          | Sorbs3          |
| ni-2               | Sorcs1          |
| nssr 1             | Sorcs2          |
| p130Cas            | Sorcs3          |
| p53                | Sorl1           |
| pa                 | Sort1           |
| radical-fringe     | Sos1            |
| rjs                | Sos2            |
| s11-6              | Sostdc1         |
| sgigsf             | Sox1            |
| sid2895            | Sox10           |
| snoCD11            | Sox11           |
| snoU54             | Sox13           |
| stap-1             | Sox14           |
| ten-m2             | Sox17           |
| traf4              | Sox18           |
| tubg1              | Sox2            |
| ubcM4              | Sox21           |
| wdc146             | Sox3            |
|                    | Sox4            |
|                    | Sox5            |
|                    | Sp1             |
|                    | Sp100           |
|                    | Sp110           |
|                    | Sp4             |
|                    | Sp6             |
|                    | Sp7             |
|                    | Spa17           |
|                    | Spag1           |
|                    | Spag4           |
|                    | Spag5           |
|                    | Spag6           |
|                    | Spag7           |
|                    | Spam1           |
|                    | Sparc           |
|                    | Sparcl1         |
|                    | Spata13         |
|                    | Spata19         |
|                    | Spata5          |
|                    | Spata6          |
|                    | Spats2l         |
|                    | Spcs2           |
|                    | Spcs3           |
|                    | Spdef           |
|                    | Spdl1           |
|                    | Speer4a         |
|                    | Speer4f         |
|                    | Spef2           |
|                    | Speg            |
|                    | Spesp1          |
|                    | Sphk1           |
|                    | Spic            |
|                    | Spin1           |
|                    | Spin4           |
|                    | Spink3          |
|                    | Spint1          |
|                    | Spint2          |
|                    | Spire2          |
|                    | Spn             |
|                    | Spn-ps          |
|                    | Spo11           |
|                    | Spock1          |
|                    | Spock2          |
|                    | Spock3          |
|                    | Spon1           |
|                    | Spon2           |
|                    | Spop            |
|                    | Spp1            |
|                    | Spp2            |
|                    | Sppl2a          |
|                    | Spr             |
|                    | Spred1          |
|                    | Spred2          |
|                    | Sprr1a          |
|                    | Sprr2d          |
|                    | Sprr2f          |
|                    | Sprr2h          |
|                    | Sprr2i          |
|                    | Sprr3           |
|                    | Spry1           |
|                    | Spry2           |
|                    | Spry4           |
|                    | Spryd3          |
|                    | Spsb1           |
|                    | Spsb4           |
|                    | Spt1            |
|                    | Spta1           |
|                    | Sptbn1          |
|                    | Sptbn2          |
|                    | Sptbn4          |
|                    | Sptlc1          |
|                    | Sptlc2          |
|                    | Sptlc3          |
|                    | Sptssb          |
|                    | Spz1            |
|                    | Sqle            |
|                    | Sqrdl           |
|                    | Sqstm1          |
|                    | Src             |
|                    | Srcin1          |
|                    | Srd5a2          |
|                    | Srd5a3          |
|                    | Srebf1          |
|                    | Srebf2          |
|                    | Srek1           |
|                    | Srgap1          |
|                    | Srgap2          |
|                    | Srgap3          |
|                    | Srgn            |
|                    | Sri             |
|                    | Srm             |
|                    | Srp54a///Srp54b |
|                    | Srp68           |
|                    | Srpk3           |
|                    | Srpr            |
|                    | Srprb           |
|                    | Srpx            |
|                    | Srpx2           |
|                    | Srr             |
|                    | Srrm1           |
|                    | Srsf12          |
|                    | Srsf2           |
|                    | Srsf3           |

Srsf7  
Srsf9  
Srst  
Srxn1  
Ss18  
Ssb  
Ssbp1  
Ssbp2  
Ssbp3  
Ssbp4  
Ssc5d  
Sspn  
Ssr1  
Ssr4  
Ssrp1  
Sst  
Sstr2  
Sstr3  
Sstr4  
Ssx2ip  
St14  
St3gal1  
St3gal2  
St3gal3  
St3gal4  
St3gal5  
St3gal6  
St6gal1  
St6gal2  
St6galnac1  
St6galnac2  
St6galnac3  
St6galnac4  
St6galnac5  
St6galnac6  
St8sia1  
St8sia2  
St8sia4  
St8sia5  
Stab2  
Stac  
Stac2  
Stag1  
Stag3  
Stam2  
Stamp1  
Stap1  
Stap2  
Stard10  
Stard4  
Stard6  
Stard8  
Stat3  
Stat5a  
Stat5b  
Stau1  
Stbd1  
Stc1  
Stc2  
Steap1  
Steap2  
Steap3  
Stfa1 /// Stfa3  
Stfa21  
Stil  
Stip1  
Stk11  
Stk11ip  
Stk16  
Stk25  
Stk3  
Stk31  
Stk32c  
Stk35  
Stk39  
Stk4  
Stk40  
Stmn2  
Stmn3  
Stom  
Ston1  
Stra13  
Stra6  
Stra8  
Strada  
Strap  
Strbp  
Strc  
Strm  
Strn  
Strn3  
Stt3a  
Stx17  
Stx18  
Stx19  
Stx1a  
Stx2  
Stx3  
Stx4a  
Stx6  
Stx8  
Stxbp1  
Stxbp2  
Stxbp3a  
Stxbp4  
Stxbp6  
Styx  
Suco  
Sufu  
Sugct  
Sugp2  
Sulf1  
Sulf2  
Sult1a1  
Sult1c1  
Sult1c2  
Sult1d1  
Sult1e1  
Sult2a2  
Sumf1  
Sumo3  
Sun2  
Supt20  
Surf2  
Surf4  
Susd4  
Suv420h1  
Suz12  
Sva  
Sval1  
Svep1  
Svop  
Svopl  
Svs2  
Svs3a  
Svs3a///Svs3b  
Svs5  
Svs6  
Swap70  
Swi5  
Swsap1  
Syap1  
Sycp1  
Sycp3  
Syde2  
Syk  
Syn1  
Syn2  
Sync

Syncrip  
Syne1  
Syne4  
Syng1  
Syng3  
Synj2  
Synj2bp  
Synpo  
Syp  
Syp1  
Syp12  
Sys1  
Syt1  
Syt10  
Syt11  
Syt12  
Syt13  
Syt17  
Syt2  
Syt3  
Syt4  
Syt5  
Syt6  
Syt7  
Syt9  
Syt11  
Syt12  
Syt14  
T  
T2  
TCRB///Tcrb-J///Trbv14  
Taar1  
Tac1  
Tac2  
Tac4  
Tacc3  
Tacr3  
Tacstd1  
Tacstd2  
Tada1  
Tada2b  
Taf10  
Taf11  
Taf1d  
Taf4b  
Taf6l  
Taf7  
Tagln  
Tagln3  
Tal1  
Tal2  
Tanc1  
Taok3  
Tap1  
Tapbp  
Tapbp1  
Tarbp2  
Tardbp  
Tas1r1  
Tas1r2  
Tas1r3  
Tas2r105  
Tasp1  
Tax1bp1  
Tax1bp3  
Tbata  
Tbc1d1  
Tbc1d13  
Tbc1d14  
Tbc1d15  
Tbc1d22a  
Tbc1d24  
Tbc1d4  
Tbc1d8b  
Tbca  
Tbcel  
Tbkbp1  
Tb11x  
Tb11xr1  
Tb12  
Tb13  
Tbp  
Tbrg4  
Tbx15  
Tbx18  
Tbx2  
Tbx20  
Tbx21  
Tbx3  
Tbx4  
Tbx5  
Tbxa2r  
Tbxas1  
Tc2n  
Tcea2  
Tceal1  
Tceal3  
Tceal3///Tceal5///Tceal6  
Tceal8  
Tceb1  
Tceb2  
Tceb3  
Tcerg1  
Tcf15  
Tcf20  
Tcf21  
Tcf23  
Tcf25  
Tcf3  
Tcf4  
Tcf7  
Tcf711  
Tcf712  
Tcfap2c  
Tcfap2e  
Tcf15  
Tcl1  
Tcl1b4  
Tcof1  
Tcp10a///Tcp10b///Tcp10c  
Tcp11  
Tcrb-J  
Tcrg-V3  
Tcstv1  
Tcstv3  
Tcta  
Tcte2  
Tctex1d1  
Tctn2  
Tctn3  
Tdgf1  
Tdh  
Tdo2  
Tdp1  
Tdp2  
Tdpoz1  
Tdrd7  
Tead1  
Tead2  
Tead4  
Tecpr1  
Tecta  
Tectb  
Tef  
Tek  
Tek2  
Telo2  
Tenc1  
Tenm1

Tenm3  
Terf1  
Terf2  
Tesc  
Tesc1  
Tesk1  
Tesk2  
Tet1  
Tex12  
Tex13  
Tex14  
Tex15  
Tex16  
Tex19.1  
Tex40  
Tex9  
Tfap2a  
Tfap2c  
Tfap2d  
Tfap4  
Tfb1m  
Tfcp2  
Tfcp2l1  
Tfdp1  
Tff2  
Tfpi  
Tfpi2  
Tfpt  
Tfr2  
Tfrc  
Tg  
Tgds  
Tgfb1  
Tgfb1l1  
Tgfb2  
Tgfb3  
Tgfbj  
Tgfbr1  
Tgfbr2  
Tgfbr3  
Tgif2  
Tgif2lx1///Tgif2lx2  
Tgm2  
Tgm3  
Tgs1  
Tha1  
Thap11  
Thap2  
Thap7  
Thbd  
Thbs1  
Thbs2  
Thbs3  
Theg  
Thns12  
Thoc1  
Thoc2  
Thoc7  
Thop1  
Thpo  
Thra  
Thrb  
Thsd1  
Thsd7a  
Thtpa  
Thumpd3  
Thy1  
Thyn1  
Tia1  
Tial1  
Tiam1  
Tiam2  
Tie1  
Tifa  
Timd2  
Timeless  
Timm10b  
Timm17a  
Timm9  
Timp1  
Timp2  
Timp3  
Timp4  
Tinag  
Tinag1  
Tirap  
Tk2  
Tkt11  
Tlcd1  
Tlcd2  
Tle1  
Tle2  
Tle3  
Tle6  
Tlk2  
Tlm  
Tln1  
Tlr1  
Tlr2  
Tlr3  
Tlr4  
Tlr7  
Tlr8  
Tlx1  
Tlx3  
Tm2d1  
Tm4sf1  
Tm4sf5  
Tm6sf1  
Tm6sf2  
Tm7sf3  
Tm9sf2  
Tm9sf3  
Tma16  
Tmc1  
Tmc2  
Tmcc2  
Tmcc3  
Tmco3  
Tmco5  
Tmed1  
Tmed11  
Tmed3  
Tmed4  
Tmed5  
Tmed6  
Tmed7  
Tmed8  
Tmed9  
Tmeff1  
Tmeff2  
Tmem100  
Tmem106a  
Tmem106b  
Tmem106c  
Tmem109  
Tmem116  
Tmem119  
Tmem120b  
Tmem129  
Tmem132a  
Tmem132e  
Tmem141  
Tmem14c  
Tmem150a  
Tmem151b  
Tmem158  
Tmem160  
Tmem161a

Tmem163  
Tmem166  
Tmem167  
Tmem16j  
Tmem173  
Tmem175  
Tmem176a  
Tmem176b  
Tmem179b  
Tmem184c  
Tmem189  
Tmem191c  
Tmem192  
Tmem2  
Tmem203  
Tmem206  
Tmem214  
Tmem216  
Tmem218  
Tmem223  
Tmem229b  
Tmem242  
Tmem246  
Tmem255a  
Tmem258  
Tmem259  
Tmem263  
Tmem27  
Tmem30a  
Tmem30b  
Tmem33  
Tmem35  
Tmem37  
Tmem38a  
Tmem38b  
Tmem39a  
Tmem40  
Tmem41a  
Tmem45a  
Tmem47  
Tmem5  
Tmem53  
Tmem54  
Tmem55a  
Tmem56  
Tmem59  
Tmem68  
Tmem71  
Tmem80  
Tmem82  
Tmem97  
Tmem98  
Tmigd1  
Tmlhe  
Tmod1  
Tmod2  
Tmod3  
Tmpo  
Tmpe  
Tmprss11d  
Tmprss13  
Tmprss2  
Tmprss5  
Tmsb10  
Tmtc1  
Tmtc2  
Tmx1  
Tnf  
Tnfaip2  
Tnfaip6  
Tnfaip8  
Tnfrsf10b  
Tnfrsf11a  
Tnfrsf11b  
Tnfrsf13b  
Tnfrsf13c  
Tnfrsf14  
Tnfrsf17  
Tnfrsf18  
Tnfrsf19  
Tnfrsf1b  
Tnfrsf21  
Tnfrsf22  
Tnfsf10  
Tnfsf11  
Tnfsf12///Tnfsf12Tnfsf13  
Tnfsf12///Tnfsf12Tnfsf13///Tnfsf13  
Tnfsf13b  
Tnfsf4  
Tnfsf8  
Tnfsf9  
Tnks2  
Tnmd  
Tnn  
Tnnc1  
Tnnc2  
Tnni2  
Tnni3  
Tnnt1  
Tnnt2  
Tnnt3  
Tnp1  
Tnp2  
Tnrc6a  
Tnrc6b  
Tns1  
Tns3  
Tns4  
Tnxb  
Toe1  
Tom1  
Tom1l2  
Tomm40  
Tomm70a  
Top2b  
Top3a  
Top3b  
Topors  
Toporsl  
Toporsos  
Tor1b  
Tor2a  
Tox  
Tox3  
Tpbpa  
Tpcn1  
Tpd52  
Tpd52l1  
Tpd52l2  
Tph1  
Tpi1  
Tpm1  
Tpm2  
Tpm3  
Tpmt  
Tpo  
Tpp2  
Tppp3  
Tpr  
Tprkb  
Tprn  
Tpsab1  
Tpsb2  
Tpsg1  
Tpst1  
Tpst2  
Tpte  
Trabd  
Traf1

Traf3  
Traf4  
Trak1  
Trak1  
Tram1  
Tram11  
Trap1a  
Trappc13  
Trappc3  
Trappc4  
Trav12n-1  
Trav9d-3  
Trbv13-2  
Trdmt1  
Trdn  
Treh  
Trem1  
Trem3  
Trex2  
Trh  
Trhr  
Trhr2  
Trib2  
Trib3  
Tril  
Trim12a  
Trim15  
Trim16  
Trim2  
Trim24  
Trim25  
Trim26  
Trim27  
Trim29  
Trim3  
Trim30a  
Trim30a///Trim30d  
Trim30d  
Trim31  
Trim34a  
Trim34a///Trim34b  
Trim35  
Trim43a  
Trim44  
Trim46  
Trim47  
Trim6  
Trim60  
Trim60,Trim61  
Trim62  
Trim69  
Trim7  
Trim8  
Trim9  
Trio  
Trip4  
Trmt1  
Trmt10a  
Trnt1  
Tro  
Trp53  
Trp53bp1  
Trp53inp2  
Trp63  
Trpc1  
Trpc2///Xntrpc  
Trpc4  
Trpc6  
Trpc7  
Trpd52l3  
Trpm1  
Trpm3  
Trpm5  
Trpm7  
Trps1  
Trpv2  
Trub2  
Tsc1  
Tsc22d1  
Tsc22d3  
Tsen15  
Tsga13  
Tshb  
Tshr  
Tshz2  
Tsix  
Tsk  
Tsk  
Tslp  
Tsn  
Tsnax  
Tsnaxip1  
Tspan1  
Tspan10  
Tspan12  
Tspan13  
Tspan15  
Tspan17  
Tspan2  
Tspan3  
Tspan31  
Tspan32  
Tspan33  
Tspan4  
Tspan5  
Tspan6  
Tspan7  
Tspo2  
Tspyl1  
Tspyl4  
Tsr2  
Tsr3  
Tssc4  
Tssk1  
Tssk2  
Tssk3  
Tssk6  
Tst  
Tsx  
Ttbk2  
Ttc1  
Ttc14  
Ttc19  
Ttc27  
Ttc28  
Ttc3  
Ttc30b  
Ttc36  
Ttc39b  
Ttc39c  
Ttc39d  
Ttc7b  
Ttf1  
Tti2  
Ttk  
Ttl  
Ttl1  
Ttl3  
Ttn  
Ttr  
Ttyh1  
Ttyh2  
Tub  
Tuba-rs1  
Tuba3a///Tuba3b  
Tuba4a  
Tuba8  
Tubb2a-ps2  
Tubb3  
Tubb4a

Tubb5  
Tubb6  
Tubg2  
Tufm  
Tulp1  
Tulp2  
Tulp3  
Tusc2  
Tusc3  
Tusc5  
Tut1  
Tvp23a  
Twf2  
Twist1  
Twist2  
Twsq1  
Txlnb  
Txn2  
Txndc11  
Txndc12  
Txndc5  
Txndc8  
Txnip  
Txnl1  
Txnrd1  
Txnrd2  
Tyms  
Tyr  
Tyrobp  
Tyrrp1  
Tyw1  
U2af1l4  
U2surp  
U90926  
Uba1  
Uba1y  
Uba5  
Uba7  
Uba2l  
Ubash3b  
Ubc  
Ube2c  
Ube2d2b  
Ube2d3  
Ube2e2  
Ube2g2  
Ube2h  
Ube2j1  
Ube2k  
Ube2l6  
Ube2m  
Ube2o  
Ube2s  
Ube2v1  
Ube3a  
Ube4a  
Ube4b  
Ubf1  
Ubl4b  
Ublcp1  
Ubn1  
Ubn1n1  
Ubn1n2  
Ubr1  
Ubr7  
Ubt1  
Ubxn10  
Ubxn11  
Ubxn2a  
Ubxn4  
Ubxn8  
Uchl1  
Uchl4  
Ucp2  
Ucp3  
Uevld  
Ufd1l  
Ufm1  
Ugcg  
Uggt2  
Ugt2a1///Ugt2a2  
Ugt2b34  
Ugt2b38  
Ugt3a1  
Ugt8a  
Uhm1  
Uhrf1bp1  
Ulk1  
Ulk2  
Umod  
Umps  
Unc13a  
Unc5b  
Unc5c  
Unc93b1  
Ung  
Unk  
Upk1a  
Upk2  
Upk3a  
Upk3b  
Upp1  
Upp2  
Uqcr10  
Urm1  
Uroc1  
Urf1  
Ush1c  
Ush2a  
Ushbp1  
Usmg2  
Usp1  
Usp11  
Usp12  
Usp13  
Usp16  
Usp17a  
Usp17c///Usp17ld  
Usp22  
Usp36  
Usp39  
Usp42  
Usp43  
Usp45  
Usp48  
Usp51  
Usp7  
Usp9x  
Usp9y  
Utf1  
Utp6  
Utrn  
Uts2  
Utx  
Uty  
Uxs1  
Vamp2  
Vamp3  
Vamp4  
Vamp5  
Vamp7  
Vangl2  
Vapa  
Vapb  
Vars  
Vash1  
Vash2  
Vasn  
Vav3

Vax2  
Vcam1  
Vcan  
Vcl  
Vcp  
Vdac3  
Vegfa  
Vegfb  
Vegfc  
Vgl1  
Vgl3  
Vgl4  
Vhl  
Vil1  
Vim  
Vimp  
Vip  
Vipr1  
Vipr2  
Vit  
Vkorc1  
Vldlr  
Vma21  
Vmn1r-ps8///Vmn1r-ps8  
Vmn1r10///Vmn1r9  
Vmn1r13  
Vmn1r14  
Vmn1r15  
Vmn1r171  
Vmn1r172  
Vmn1r187///Vmn1r63  
Vmn1r25  
Vmn1r29  
Vmn1r40  
Vmn1r41  
Vmn1r44  
Vmn1r45  
Vmn1r46  
Vmn1r47  
Vmn1r47///Vmn1r48  
Vmn1r49  
Vmn1r50  
Vmn1r51  
Vmn1r53  
Vmn1r56  
Vmn1r58  
Vmn2r-ps54  
Vmn2r1  
Vmn2r10  
Vmn2r103///Vmn2r96///Vmn2r97///Vmn2r98  
Vmn2r26  
Vmn2r88  
Vnn1  
Vopp1  
Vprbp  
Vpreb1  
Vps11  
Vps13c  
Vps18  
Vps25  
Vps28  
Vps35  
Vps39  
Vps53  
Vps72  
Vps9d1  
Vrk2  
Vsig2  
Vsnl1  
Vstm2a  
Vstm2b  
Vsx1  
Vtn  
Vwa1  
Vwa2  
Vwa5a  
Vwc2  
Vwf  
WIF1  
Wap  
Wars  
Wasf1  
Wasf3  
Wasl  
Wbp1l  
Wbscr22  
Wbscr25  
Wbscr27  
Wdfy1  
Wdfy3  
Wdpcp  
Wdr12  
Wdr13  
Wdr20  
Wdr26  
Wdr33  
Wdr45  
Wdr54  
Wdr6  
Wdr75  
Wdr77  
Wdr81  
Wdr86  
Wdsub1  
Wee1  
Wfdc1  
Wfdc12  
Wfdc15b  
Wfdc18  
Wfdc2  
Wfdc21  
Wfdc5  
Wfikkn1  
Wfs1  
Wif1  
Wipf1  
Wipi1  
Wipi2  
Wisp1  
Wisp2  
Wnk1  
Wnk2  
Wnk4  
Wnt1  
Wnt10a  
Wnt10b  
Wnt16  
Wnt2b  
Wnt5a  
Wnt5b  
Wnt6  
Wnt7a  
Wnt7b  
Wnt8b  
Wnt9a  
Wnt9b  
Wrap53  
Wrn  
Wrmip1  
Wsb1  
Wt1  
Wtap  
Wwc1  
Wwc2  
Wwox  
Wwp2  
Wwtr1  
Xbp1  
Xcr1



Xdh  
Xiap  
Xirp1  
Xist  
Xk  
Xkr6  
Xlr4a///Xlr4b///Xlr4c  
Xpa  
Xpnpep1  
Xpnpep2  
Xpr1  
Xrcc2  
Xrcc4  
Xrrn1  
Xylb  
Xylt2  
Yae1d1  
Yaf2  
Yars  
Ybx1  
Ybx2  
Yes1  
Yipf4  
Ykt6  
Yme111  
Ypel1  
Ypel2  
Ythdf1  
Ywhab  
Ywhag  
Ywhaq  
Ywhaz  
Zak  
Zap70  
Zbed3  
Zbed6///Zc3h11a  
Zbp1  
Zbtb11  
Zbtb12  
Zbtb14  
Zbtb16  
Zbtb20  
Zbtb3  
Zbtb33  
Zbtb37  
Zbtb45  
Zbtb46  
Zbtb7a  
Zbtb7c  
Zbtb8a  
Zc2hc1c  
Zc3h12a  
Zc3h12b  
Zc3h3  
Zc3h7a  
Zc3hc1  
Zcchc14  
Zcchc18  
Zcchc3  
Zcchc5  
Zdhhc1  
Zdhhc12  
Zdhhc14  
Zdhhc2  
Zdhhc3  
Zdhhc6  
Zeb1  
Zeb2  
Zfand2a  
Zfand3  
Zfand5  
Zfand6  
Zfhx3  
Zfhx4  
Zfml  
Zfp105  
Zfp106  
Zfp108  
Zfp110  
Zfp111  
Zfp125  
Zfp14  
Zfp142  
Zfp143  
Zfp148  
Zfp160  
Zfp179  
Zfp189  
Zfp191  
Zfp202  
Zfp207  
Zfp213  
Zfp235  
Zfp239  
Zfp260  
Zfp275  
Zfp276  
Zfp277  
Zfp28  
Zfp280d  
Zfp281  
Zfp286  
Zfp287  
Zfp30  
Zfp318  
Zfp319  
Zfp334  
Zfp346  
Zfp352  
Zfp353-ps  
Zfp354a  
Zfp354b  
Zfp354c  
Zfp36  
Zfp362  
Zfp369  
Zfp3611  
Zfp3612  
Zfp37  
Zfp386  
Zfp395  
Zfp398  
Zfp40  
Zfp418  
Zfp42  
Zfp422  
Zfp423  
Zfp428  
Zfp444  
Zfp451  
Zfp462  
Zfp467  
Zfp472  
Zfp474  
Zfp493  
Zfp503  
Zfp518b  
Zfp52  
Zfp521  
Zfp53  
Zfp553  
Zfp57  
Zfp574  
Zfp575  
Zfp59  
Zfp60  
Zfp605  
Zfp61  
Zfp612

Zfp618  
Zfp64  
Zfp641  
Zfp644  
Zfp651  
Zfp68  
Zfp688  
Zfp689  
Zfp697  
Zfp704  
Zfp750  
Zfp768  
Zfp771  
Zfp787  
Zfp790  
Zfp804b  
Zfp81  
Zfp810  
Zfp82  
Zfp825  
Zfp865  
Zfp868  
Zfp87  
Zfp90  
Zfp92  
Zfp93  
Zfp931  
Zfp937  
Zfp94  
Zfp940  
Zfp943  
Zfp944  
Zfp945  
Zfpm1  
Zfpm2  
Zfr  
Zfx  
Zfy1//Zfy2  
Zfyve16  
Zfyve19  
Zfyve21  
Zfyve27  
Zg16  
Zhx1  
Zic1  
Zic2  
Zic3  
Zic4  
Zic5  
Zik1  
Zim1  
Zim3  
Zkscan14  
Zkscan16  
Zkscan2  
Zkscan3  
Zkscan5  
Zmat5  
Zmiz1  
Zmym1  
Zmym5  
Zmynd10  
Zmynd11  
Zmynd19  
Znhit1  
Znhit3  
Znrd1  
Znrf1  
Znrf4  
Zp1  
Zp2  
Zp3r  
Zpbp  
Zpr1  
Zranb2  
Zrsr1  
Zrsr2  
Zscan12  
Zscan18  
Zscan2  
Zscan21  
Zscan26  
Zscan5b  
Zswim1  
Zswim7  
Zwint  
Zxdc  
Zyg11a  
a  
abParts//lgh-VJ558//lghm//lghv1-53//lghv1-62-3//lghv1-72  
abParts//lgh//lghg1//lghm  
abParts//lghm  
abParts//lghv14-111  
abParts//lghv4-55//lghv4-62//lghv4-68//lghv4-69//lghv4-71//lghv4-72//lghv4-78  
abParts//lghv4-68//lghv4-73//lghv4-81  
abParts//lghv6-13//lghv6-14

**Table S5: Bioinformatic analysis of the intersection between the pan-DP signature and the pan-Blimp1 target genes**

This table consists of 3 tabs

**Analysis Settings**

Cutoff before duplicate resolution  
 Reference set  
 Relationship to include  
 Includes Endogenous Chemicals  
 Optional Analyses  
 Filter Summary  
 Consider only relationships where  
 confidence = Experimentally Observed

TRUE

Ingenuity Knowledge Base (Genes + Endogenous Chemicals)  
 Direct and Indirect  
 Yes  
 My Pathways My List

**Diseases and Bio Functions**

| Categories                                                            | Functions                             | Diseases or Functions Annotation         | p-Value  |
|-----------------------------------------------------------------------|---------------------------------------|------------------------------------------|----------|
| Cellular Growth and Proliferation                                     | proliferation                         | proliferation of cells                   | 2.63E-77 |
| Organismal Survival                                                   | organismal death                      | organismal death                         | 6.43E-72 |
| Organismal Survival                                                   | morbidity or mortality                | morbidity or mortality                   | 1.15E-70 |
| Cancer, Organismal Injury and Abnormalities                           | malignant solid tumor                 | malignant solid tumor                    | 1.64E-63 |
| Cancer, Organismal Injury and Abnormalities                           | cancer                                | cancer                                   | 4.23E-60 |
| Cancer, Organismal Injury and Abnormalities                           | non-melanoma solid tumor              | non-melanoma solid tumor                 | 5.60E-59 |
| Cancer, Organismal Injury and Abnormalities                           | neoplasia                             | neoplasia of epithelial tissue           | 2.49E-58 |
| Cellular Growth and Proliferation, Tissue Development                 | generation                            | generation of cells                      | 4.51E-58 |
| Cancer, Organismal Injury and Abnormalities                           | tumorigenesis                         | tumorigenesis of tissue                  | 5.21E-58 |
| Cellular Development                                                  | differentiation                       | differentiation of cells                 | 5.79E-58 |
| Cancer, Organismal Injury and Abnormalities                           | epithelial cancer                     | epithelial cancer                        | 1.06E-56 |
| Cancer, Gastrointestinal Disease, Organismal Injury and Abnormalities | digestive organ tumor                 | digestive organ tumor                    | 2.03E-55 |
| Cancer, Gastrointestinal Disease, Organismal Injury and Abnormalities | digestive system cancer               | digestive system cancer                  | 6.13E-55 |
| Gene Expression                                                       | transcription                         | transcription of RNA                     | 8.72E-55 |
| Cancer, Organismal Injury and Abnormalities                           | abdominal neoplasm                    | abdominal neoplasm                       | 1.52E-54 |
| Gene Expression                                                       | transcription                         | transcription                            | 4.76E-54 |
| Cancer, Organismal Injury and Abnormalities                           | abdominal cancer                      | abdominal cancer                         | 7.45E-54 |
| Cell Morphology                                                       | morphology                            | morphology of cells                      | 1.75E-52 |
| Gene Expression                                                       | expression                            | expression of RNA                        | 5.83E-52 |
| Cancer, Organismal Injury and Abnormalities                           | adenocarcinoma                        | adenocarcinoma                           | 4.60E-51 |
| Gene Expression                                                       | transcription                         | transcription of DNA                     | 9.68E-51 |
| Nervous System Development and Function                               | morphology                            | morphology of nervous system             | 1.20E-49 |
| Cell Death and Survival                                               | cell death                            | cell death                               | 3.33E-49 |
| Cancer, Gastrointestinal Disease, Organismal Injury and Abnormalities | gastrointestinal carcinoma            | gastrointestinal carcinoma               | 1.82E-47 |
| Cancer, Gastrointestinal Disease, Organismal Injury and Abnormalities | gastrointestinal tract cancer         | gastrointestinal tract cancer            | 3.33E-47 |
| Cancer, Gastrointestinal Disease, Organismal Injury and Abnormalities | neoplasia                             | Gastrointestinal Tract Cancer and Tumors | 4.27E-47 |
| Embryonic Development, Organismal Development                         | development                           | development of body trunk                | 4.72E-47 |
| Cancer, Gastrointestinal Disease, Organismal Injury and Abnormalities | large intestine carcinoma             | large intestine carcinoma                | 1.92E-46 |
| Cancer, Gastrointestinal Disease, Organismal Injury and Abnormalities | intestinal carcinoma                  | intestinal carcinoma                     | 2.01E-46 |
| Cancer, Gastrointestinal Disease, Organismal Injury and Abnormalities | large intestine neoplasm              | large intestine neoplasm                 | 2.19E-46 |
| Cancer, Gastrointestinal Disease, Organismal Injury and Abnormalities | malignant neoplasm of large intestine | malignant neoplasm of large intestine    | 4.40E-46 |
| Embryonic Development, Organismal Development                         | development                           | development of body axis                 | 4.55E-46 |
| Nervous System Development and Function, Neurological Disease         | abnormal morphology                   | abnormal morphology of nervous system    | 5.00E-46 |

|                                                                                                              |                                |                                         |          |
|--------------------------------------------------------------------------------------------------------------|--------------------------------|-----------------------------------------|----------|
| Cancer, Gastrointestinal Disease, Organismal Injury and Abnormalities                                        | intestinal cancer              | intestinal cancer                       | 1.14E-45 |
| Cancer, Gastrointestinal Disease, Organismal Injury and Abnormalities                                        | intestinal tumor               | intestinal tumor                        | 1.18E-45 |
| Cellular Development, Cellular Growth and Proliferation, Nervous System Development and Gene Expression      | development                    | development of neurons                  | 1.66E-45 |
| Gene Expression                                                                                              | activation                     | activation of DNA endogenous promoter   | 3.71E-45 |
| Cell Death and Survival                                                                                      | necrosis                       | necrosis                                | 1.38E-44 |
| Cell Death and Survival                                                                                      | apoptosis                      | apoptosis                               | 2.47E-44 |
| Cell Morphology                                                                                              | abnormal morphology            | abnormal morphology of cells            | 6.31E-44 |
| Cancer, Gastrointestinal Disease, Organismal Injury and Abnormalities                                        | intestinal adenocarcinoma      | intestinal adenocarcinoma               | 2.07E-43 |
| Cancer, Gastrointestinal Disease, Organismal Injury and Abnormalities                                        | large intestine adenocarcinoma | large intestine adenocarcinoma          | 3.46E-43 |
| Embryonic Development, Organismal Development                                                                | development                    | development of head                     | 4.51E-43 |
| Cellular Movement                                                                                            | cell movement                  | cell movement                           | 9.43E-41 |
| Organismal Development, Organismal Injury and Abnormalities                                                  | abnormal morphology            | abnormal morphology of head             | 3.74E-40 |
| Organismal Development                                                                                       | morphology                     | morphology of head                      | 6.76E-40 |
| Organismal Development                                                                                       | morphology                     | morphology of body cavity               | 4.12E-39 |
| Tissue Morphology                                                                                            | quantity                       | quantity of cells                       | 1.31E-37 |
| Cellular Assembly and Organization, Cellular Function and Maintenance                                        | organization                   | organization of cytoplasm               | 5.91E-37 |
| Cell Death and Survival                                                                                      | survival                       | cell survival                           | 9.35E-37 |
| Cellular Movement                                                                                            | migration                      | migration of cells                      | 1.61E-36 |
| Cellular Assembly and Organization, Cellular Function and Maintenance                                        | organization                   | organization of cytoskeleton            | 1.93E-36 |
| Cellular Development                                                                                         | differentiation                | differentiation of nervous system       | 2.62E-36 |
| Organismal Development                                                                                       | abnormal morphology            | abnormal morphology of body cavity      | 8.09E-36 |
| Cellular Assembly and Organization, Cellular Function and Maintenance                                        | organization                   | microtubule dynamics                    | 4.96E-35 |
| Cell Death and Survival                                                                                      | cell viability                 | cell viability                          | 1.36E-34 |
| Cancer, Organismal Injury and Abnormalities                                                                  | breast or colorectal cancer    | breast or colorectal cancer             | 1.51E-34 |
| Cellular Development, Cellular Growth and Proliferation                                                      | cell proliferation             | cell proliferation of tumor cell lines  | 9.23E-34 |
| Cardiovascular System Development and Function                                                               | development                    | development of vasculature              | 7.84E-33 |
| Cellular Movement                                                                                            | invasion                       | invasion of cells                       | 2.08E-32 |
| Cancer, Organismal Injury and Abnormalities                                                                  | abdominal adenocarcinoma       | abdominal adenocarcinoma                | 2.94E-32 |
| Cell Morphology, Cellular Assembly and Organization, Cellular Development, Cellular Function and Maintenance | neuritogenesis                 | neuritogenesis                          | 7.15E-32 |
| Cell Death and Survival                                                                                      | cell death                     | cell death of tumor cell lines          | 7.25E-32 |
| Cell Morphology, Cellular Assembly and Organization, Cellular Function and Maintenance                       | formation                      | formation of cellular protrusions       | 2.70E-31 |
| Cancer, Organismal Injury and Abnormalities                                                                  | abdominal carcinoma            | abdominal carcinoma                     | 6.04E-31 |
| Cell Morphology, Nervous System Development and Function, Tissue Morphology                                  | morphology                     | morphology of neurons                   | 6.50E-31 |
| Tissue Development                                                                                           | growth                         | growth of epithelial tissue             | 6.87E-31 |
| Developmental Disorder, Embryonic Development, Organismal Development, Tissue Morphology                     | abnormal morphology            | abnormal morphology of embryonic tissue | 1.01E-30 |
| Nervous System Development and Function, Tissue Morphology                                                   | morphology                     | morphology of nervous tissue            | 1.33E-30 |
| Nervous System Development and Function                                                                      | development                    | development of central nervous system   | 1.87E-30 |
| Cell Death and Survival                                                                                      | apoptosis                      | apoptosis of tumor cell lines           | 6.19E-30 |
| Cardiovascular System Development and Function, Organismal Development                                       | angiogenesis                   | angiogenesis                            | 3.33E-29 |
| Cellular Development, Nervous System Development and Function, Tissue Development                            | differentiation                | differentiation of neurons              | 6.52E-29 |
| Developmental Disorder                                                                                       | dysgenesis                     | dysgenesis                              | 7.88E-29 |
| Gastrointestinal Disease, Hepatic System Disease, Organismal Injury and Abnormalities                        | liver lesion                   | liver lesion                            | 1.08E-28 |
| Cancer, Organismal Injury and Abnormalities                                                                  | benign neoplasia               | benign neoplasia                        | 1.78E-28 |
| Cell Morphology, Cellular Assembly and Organization, Cellular Development, Cellular Function and Maintenance | axonogenesis                   | axonogenesis                            | 2.62E-28 |
| Molecular Transport                                                                                          | transport                      | transport of molecule                   | 4.43E-28 |
| Cellular Function and Maintenance                                                                            | homeostasis                    | cellular homeostasis                    | 6.68E-28 |

|                                                                                                         |                                 |                                               |          |
|---------------------------------------------------------------------------------------------------------|---------------------------------|-----------------------------------------------|----------|
| Developmental Disorder                                                                                  | hypoplasia                      | hypoplasia of organ                           | 8.35E-28 |
| Organismal Development, Organismal Injury and Abnormalities                                             | abnormal morphology             | abnormal morphology of abdomen                | 1.45E-27 |
| Developmental Disorder                                                                                  | hypoplasia                      | Hypoplasia                                    | 3.08E-27 |
| Developmental Disorder                                                                                  | growth failure                  | Growth Failure                                | 3.10E-27 |
| Cell Cycle                                                                                              | cell cycle progression          | cell cycle progression                        | 8.90E-27 |
| Embryonic Development, Nervous System Development and Function, Organ Development                       | formation                       | formation of brain                            | 9.52E-27 |
| Organismal Development                                                                                  | growth                          | growth of organism                            | 1.25E-26 |
| Cellular Development, Cellular Growth and Proliferation, Nervous System Development and Function        | proliferation                   | proliferation of neuronal cells               | 1.89E-26 |
| Cellular Movement                                                                                       | cell movement                   | cell movement of tumor cell lines             | 2.72E-26 |
| Cancer, Gastrointestinal Disease, Organismal Injury and Abnormalities                                   | colorectal neoplasia            | colorectal neoplasia                          | 2.89E-26 |
| Cancer, Gastrointestinal Disease, Hepatic System Disease, Organismal Injury and Abnormalities           | liver tumor                     | liver tumor                                   | 3.07E-26 |
| Embryonic Development, Organ Development, Organismal Development, Tissue Development                    | development                     | development of sensory organ                  | 3.94E-26 |
| Cell Death and Survival                                                                                 | cell death                      | neuronal cell death                           | 4.31E-26 |
| Nervous System Development and Function                                                                 | morphology                      | morphology of central nervous system          | 4.82E-26 |
| Gene Expression                                                                                         | transactivation                 | transactivation                               | 5.45E-26 |
| Organismal Development, Organismal Injury and Abnormalities                                             | abnormal morphology             | abnormal morphology of thoracic cavity        | 1.06E-25 |
| Nervous System Development and Function, Neurological Disease                                           | abnormal morphology             | abnormal morphology of central nervous system | 1.10E-25 |
| Organismal Development                                                                                  | development                     | development of genitourinary system           | 1.30E-25 |
| Cancer, Gastrointestinal Disease, Organismal Injury and Abnormalities                                   | colorectal cancer               | colorectal cancer                             | 1.34E-25 |
| Embryonic Development, Organismal Development                                                           | growth                          | growth of embryo                              | 1.89E-25 |
| Cancer, Organismal Injury and Abnormalities, Reproductive System Disease                                | breast or ovarian cancer        | breast or ovarian cancer                      | 1.99E-25 |
| Cancer, Gastrointestinal Disease, Hepatic System Disease, Organismal Injury and Abnormalities           | hepatobiliary system cancer     | hepatobiliary system cancer                   | 2.83E-25 |
| Organismal Development                                                                                  | size                            | size of body                                  | 4.39E-25 |
| Neurological Disease                                                                                    | movement disorder               | Movement Disorders                            | 4.64E-25 |
| Cellular Movement                                                                                       | invasion                        | invasion of tumor cell lines                  | 5.29E-25 |
| Cancer, Gastrointestinal Disease, Organismal Injury and Abnormalities                                   | colorectal carcinoma            | colorectal carcinoma                          | 5.49E-25 |
| Cancer, Gastrointestinal Disease, Hepatic System Disease, Organismal Injury and Abnormalities           | cancer                          | liver cancer                                  | 7.47E-25 |
| Digestive System Development and Function                                                               | development                     | development of digestive system               | 7.75E-25 |
| Nervous System Development and Function, Organ Morphology, Organismal Development                       | morphology                      | morphology of brain                           | 8.23E-25 |
| Cardiovascular System Development and Function, Organismal Development                                  | vasculogenesis                  | vasculogenesis                                | 8.40E-25 |
| Cellular Movement                                                                                       | migration                       | migration of tumor cell lines                 | 1.01E-24 |
| Gene Expression                                                                                         | transactivation                 | transactivation of RNA                        | 1.26E-24 |
| Cell Morphology, Nervous System Development and Function, Neurological Disease, Tissue Development      | abnormal morphology             | abnormal morphology of neurons                | 1.58E-24 |
| Cancer, Gastrointestinal Disease, Hepatic System Disease, Organismal Injury and Abnormalities           | liver carcinoma                 | liver carcinoma                               | 1.68E-24 |
| Nervous System Development and Function, Neurological Disease, Organ Morphology, Organismal Development | abnormal morphology             | abnormal morphology of brain                  | 2.23E-24 |
| Cardiovascular System Development and Function                                                          | morphology                      | morphology of cardiovascular system           | 2.58E-24 |
| Cancer, Gastrointestinal Disease, Organismal Injury and Abnormalities                                   | colon tumor                     | colon tumor                                   | 6.34E-24 |
| Cancer, Organismal Injury and Abnormalities, Reproductive System Disease                                | mammary tumor                   | mammary tumor                                 | 6.89E-24 |
| Organismal Survival                                                                                     | perinatal death                 | perinatal death                               | 1.13E-23 |
| Cellular Development, Connective Tissue Development and Function, Tissue Development                    | differentiation                 | differentiation of connective tissue          | 1.68E-23 |
| Cancer, Gastrointestinal Disease, Organismal Injury and Abnormalities                                   | colon cancer                    | colon cancer                                  | 1.81E-23 |
| Nervous System Development and Function, Tissue Development                                             | morphogenesis                   | morphogenesis of nervous tissue               | 2.00E-23 |
| Tissue Development                                                                                      | development                     | development of epithelial tissue              | 2.00E-23 |
| Cancer, Organismal Injury and Abnormalities, Reproductive System Disease                                | breast cancer                   | breast cancer                                 | 2.81E-23 |
| Cancer, Gastrointestinal Disease, Organismal Injury and Abnormalities                                   | gastrointestinal adenocarcinoma | gastrointestinal adenocarcinoma               | 4.69E-23 |
| Cell Morphology, Cellular Development, Cellular Growth and Proliferation, Nervous System Development    | morphogenesis                   | morphogenesis of neurons                      | 5.65E-23 |

|                                                                                                               |                               |                                            |          |
|---------------------------------------------------------------------------------------------------------------|-------------------------------|--------------------------------------------|----------|
| Cellular Development, Cellular Growth and Proliferation, Nervous System Development and Function              | growth                        | growth of neurites                         | 6.16E-23 |
| Cancer, Hematological Disease, Organismal Injury and Abnormalities                                            | hematological neoplasia       | hematological neoplasia                    | 1.12E-22 |
| Cancer, Hematological Disease, Organismal Injury and Abnormalities                                            | lymphohematopoietic neoplasia | lymphohematopoietic neoplasia              | 1.30E-22 |
| Cardiovascular System Development and Function, Embryonic Development, Organ Development and Function         | cardiogenesis                 | cardiogenesis                              | 1.68E-22 |
| Cellular Growth and Proliferation, Lymphoid Tissue Structure and Development                                  | proliferation                 | proliferation of lymphatic system cells    | 1.85E-22 |
| Cellular Development, Cellular Growth and Proliferation                                                       | proliferation                 | proliferation of blood cells               | 1.96E-22 |
| Embryonic Development, Organismal Development                                                                 | development                   | development of abdomen                     | 2.30E-22 |
| Nervous System Development and Function                                                                       | development                   | sensory system development                 | 2.66E-22 |
| Embryonic Development, Organ Development, Organismal Development                                              | development                   | development of lymphatic system            | 4.09E-22 |
| Cancer, Hematological Disease, Organismal Injury and Abnormalities                                            | lymphocytic neoplasm          | lymphocytic neoplasm                       | 5.70E-22 |
| Organismal Survival                                                                                           | survival                      | survival of organism                       | 7.73E-22 |
| Cell Morphology                                                                                               | sprouting                     | sprouting                                  | 8.38E-22 |
| Cancer, Gastrointestinal Disease, Organismal Injury and Abnormalities                                         | colon carcinoma               | colon carcinoma                            | 9.75E-22 |
| Cardiovascular System Development and Function, Organ Morphology, Organismal Development and Function         | morphology                    | morphology of heart                        | 1.06E-21 |
| Digestive System Development and Function                                                                     | morphology                    | morphology of digestive system             | 1.15E-21 |
| Cancer, Gastrointestinal Disease, Organismal Injury and Abnormalities                                         | colorectal adenocarcinoma     | colorectal adenocarcinoma                  | 1.18E-21 |
| Cell Morphology, Cellular Assembly and Organization, Cellular Development, Cellular Function and Organization | morphogenesis                 | morphogenesis of neurites                  | 1.28E-21 |
| Infectious Diseases                                                                                           | infection                     | Viral Infection                            | 1.68E-21 |
| Cancer, Organismal Injury and Abnormalities                                                                   | growth                        | growth of tumor                            | 2.13E-21 |
| Cellular Development, Cellular Growth and Proliferation, Nervous System Development and Function              | outgrowth                     | outgrowth of neurites                      | 3.76E-21 |
| Cell Death and Survival, Organismal Injury and Abnormalities                                                  | necrosis                      | necrosis of epithelial tissue              | 5.02E-21 |
| Behavior                                                                                                      | behavior                      | behavior                                   | 8.53E-21 |
| Cellular Growth and Proliferation                                                                             | outgrowth                     | outgrowth of cells                         | 1.44E-20 |
| Cellular Growth and Proliferation, Tissue Development                                                         | proliferation                 | proliferation of epithelial cells          | 1.71E-20 |
| Nervous System Development and Function, Tissue Morphology                                                    | quantity                      | quantity of neurons                        | 1.77E-20 |
| Cellular Development, Hematological System Development and Function                                           | differentiation               | differentiation of blood cells             | 2.27E-20 |
| Cancer, Hematological Disease, Organismal Injury and Abnormalities                                            | lymphohematopoietic cancer    | lymphohematopoietic cancer                 | 2.91E-20 |
| Cancer, Hematological Disease, Organismal Injury and Abnormalities                                            | hematologic cancer            | hematologic cancer                         | 3.74E-20 |
| Connective Tissue Development and Function, Skeletal and Muscular System Development and Function             | morphology                    | morphology of bone                         | 6.79E-20 |
| Developmental Disorder                                                                                        | midline defect                | midline defect                             | 7.06E-20 |
| Cancer, Gastrointestinal Disease, Organismal Injury and Abnormalities                                         | colon adenocarcinoma          | colon adenocarcinoma                       | 7.93E-20 |
| Cellular Development, Connective Tissue Development and Function, Tissue Development and Function             | differentiation               | differentiation of connective tissue cells | 8.25E-20 |
| Cancer, Organismal Injury and Abnormalities                                                                   | melanoma                      | melanoma                                   | 8.57E-20 |
| Cell Death and Survival                                                                                       | apoptosis                     | apoptosis of neurons                       | 1.04E-19 |
| Hematological System Development and Function, Tissue Morphology                                              | quantity                      | quantity of blood cells                    | 1.42E-19 |
| Cancer, Organismal Injury and Abnormalities                                                                   | neoplasia                     | Lymphoid Cancer and Tumors                 | 1.67E-19 |
| Cardiovascular System Development and Function, Cellular Development, Cellular Function and Organization      | development                   | endothelial cell development               | 1.83E-19 |
| Cellular Development                                                                                          | branching                     | branching of cells                         | 1.83E-19 |
| Cellular Development, Cellular Growth and Proliferation, Hematological System Development and Function        | proliferation                 | proliferation of immune cells              | 1.89E-19 |
| Lymphoid Tissue Structure and Development, Tissue Morphology                                                  | quantity                      | quantity of lymphatic system cells         | 2.27E-19 |
| Organismal Survival                                                                                           | neonatal death                | neonatal death                             | 2.94E-19 |
| Embryonic Development, Nervous System Development and Function, Organ Development and Function                | formation                     | formation of eye                           | 3.15E-19 |
| Connective Tissue Development and Function, Tissue Development and Function                                   | growth                        | growth of connective tissue                | 3.42E-19 |
| Cardiovascular System Development and Function                                                                | morphology                    | morphology of vasculature                  | 3.86E-19 |
| Cardiovascular Disease, Cardiovascular System Development and Function, Organ Morphology and Function         | abnormal morphology           | abnormal morphology of heart               | 3.96E-19 |
| Organismal Development, Reproductive System Development and Function                                          | development                   | development of reproductive system         | 4.11E-19 |

|                                                                                            |                                        |                                                 |          |
|--------------------------------------------------------------------------------------------|----------------------------------------|-------------------------------------------------|----------|
| Cardiovascular Disease, Cardiovascular System Development and Function                     | abnormal morphology                    | abnormal morphology of cardiovascular system    | 4.52E-19 |
| Cardiovascular System Development and Function, Tissue Development                         | development                            | development of cardiovascular tissue            | 7.25E-19 |
| Cellular Development, Cellular Growth and Proliferation, Embryonic Development, Lympho     | development                            | development of lymphatic system cells           | 8.56E-19 |
| Cancer, Organismal Injury and Abnormalities                                                | metastasis                             | metastasis                                      | 9.23E-19 |
| Cancer, Organismal Injury and Abnormalities                                                | advanced malignant tumor               | advanced malignant tumor                        | 9.33E-19 |
| Cellular Development, Cellular Growth and Proliferation, Hematological System Developme    | proliferation                          | proliferation of lymphocytes                    | 9.66E-19 |
| Cellular Growth and Proliferation, Connective Tissue Development and Function, Tissue De   | proliferation                          | proliferation of connective tissue cells        | 9.76E-19 |
| Skeletal and Muscular System Development and Function                                      | morphology                             | morphology of skeleton                          | 1.34E-18 |
| Cellular Development, Tissue Development                                                   | differentiation                        | differentiation of epithelial tissue            | 1.36E-18 |
| Cell Cycle                                                                                 | interphase                             | interphase                                      | 1.38E-18 |
| Cellular Development, Cellular Growth and Proliferation, Hematological System Developme    | proliferation                          | proliferation of mononuclear leukocytes         | 1.70E-18 |
| Hematological Disease, Immunological Disease                                               | lymphoproliferative disorder           | lymphoproliferative disorder                    | 1.75E-18 |
| Connective Tissue Development and Function, Connective Tissue Disorders, Organismal Inji   | abnormal morphology                    | abnormal morphology of bone                     | 1.81E-18 |
| Cellular Growth and Proliferation                                                          | colony formation                       | colony formation of cells                       | 1.88E-18 |
| Embryonic Development, Organismal Development, Skeletal and Muscular System Develop        | development                            | limb development                                | 2.14E-18 |
| Embryonic Development, Organismal Development                                              | morphogenesis                          | morphogenesis of head                           | 2.15E-18 |
| Cancer, Hematological Disease, Immunological Disease, Organismal Injury and Abnormalitie   | lymphoproliferative malignancy         | lymphoproliferative malignancy                  | 2.20E-18 |
| Cell Death and Survival                                                                    | cell death                             | cell death of connective tissue cells           | 2.25E-18 |
| Hematological System Development and Function, Tissue Morphology                           | quantity                               | quantity of leukocytes                          | 2.48E-18 |
| Reproductive System Development and Function                                               | morphology                             | morphology of reproductive system               | 2.62E-18 |
| Cell Morphology, Nervous System Development and Function, Tissue Morphology                | morphology                             | morphology of neurites                          | 2.72E-18 |
| Respiratory System Development and Function                                                | development                            | respiratory system development                  | 3.08E-18 |
| Embryonic Development, Hair and Skin Development and Function, Organ Development, O        | formation                              | formation of skin                               | 3.31E-18 |
| Digestive System Development and Function                                                  | development                            | development of gastrointestinal tract           | 3.41E-18 |
| Cancer, Organismal Injury and Abnormalities                                                | connective or soft tissue tumor        | connective or soft tissue tumor                 | 3.81E-18 |
| Cell Morphology                                                                            | shape change                           | shape change of neurites                        | 4.17E-18 |
| Cancer                                                                                     | transformation                         | cell transformation                             | 4.73E-18 |
| Cancer, Hematological Disease, Organismal Injury and Abnormalities                         | lymphoid cancer                        | lymphoid cancer                                 | 4.78E-18 |
| Cellular Movement, Nervous System Development and Function                                 | migration                              | migration of neurons                            | 5.22E-18 |
| Tissue Morphology                                                                          | morphology                             | morphology of connective tissue                 | 5.69E-18 |
| Cell Morphology                                                                            | shape change                           | shape change of neurons                         | 5.70E-18 |
| Cellular Development                                                                       | differentiation                        | differentiation of tumor cell lines             | 7.04E-18 |
| Cellular Development                                                                       | differentiation                        | differentiation of central nervous system cells | 7.07E-18 |
| Cardiovascular System Development and Function, Cellular Development, Cellular Function    | proliferation                          | proliferation of endothelial cells              | 7.68E-18 |
| Cellular Development, Embryonic Development, Organismal Development, Tissue Developr       | differentiation                        | differentiation of embryonic tissue             | 8.40E-18 |
| Cellular Development, Cellular Growth and Proliferation, Embryonic Development, Organisi   | proliferation                          | proliferation of embryonic cells                | 8.41E-18 |
| Cardiovascular System Development and Function                                             | morphology                             | morphology of vessel                            | 8.92E-18 |
| Cell Death and Survival, Organismal Injury and Abnormalities                               | cell death                             | cell death of epithelial cells                  | 9.03E-18 |
| Behavior                                                                                   | locomotion                             | locomotion                                      | 9.22E-18 |
| Cancer, Organismal Injury and Abnormalities                                                | adenoma                                | adenoma                                         | 1.11E-17 |
| Cardiovascular System Development and Function, Cellular Movement                          | cell movement                          | cell movement of endothelial cells              | 1.17E-17 |
| Cellular Growth and Proliferation                                                          | colony formation                       | colony formation                                | 1.18E-17 |
| Developmental Disorder, Gastrointestinal Disease                                           | congenital anomaly of digestive system | congenital anomaly of digestive system          | 1.21E-17 |
| Digestive System Development and Function, Gastrointestinal Disease                        | abnormal morphology                    | abnormal morphology of digestive system         | 1.29E-17 |
| Cell Morphology, Cellular Assembly and Organization, Cellular Development, Cellular Functi | branching                              | branching of neurons                            | 1.93E-17 |
| Gene Expression                                                                            | binding                                | binding of DNA                                  | 2.06E-17 |



|                                                                                               |                               |                                            |          |
|-----------------------------------------------------------------------------------------------|-------------------------------|--------------------------------------------|----------|
| Connective Tissue Disorders, Organismal Injury and Abnormalities, Skeletal and Muscular D     | abnormal morphology           | abnormal morphology of skeleton            | 2.25E-17 |
| Cell Death and Survival                                                                       | cell viability                | cell viability of tumor cell lines         | 2.40E-17 |
| Cellular Development, Cellular Growth and Proliferation, Connective Tissue Development a      | proliferation                 | proliferation of fibroblast cell lines     | 2.44E-17 |
| Neurological Disease, Organismal Injury and Abnormalities                                     | seizure disorder              | seizure disorder                           | 2.73E-17 |
| Lymphoid Tissue Structure and Development, Tissue Morphology                                  | quantity                      | quantity of lymphoid cells                 | 2.75E-17 |
| Hematological System Development and Function, Tissue Morphology                              | quantity                      | quantity of mononuclear leukocytes         | 2.79E-17 |
| Cell Morphology, Cellular Assembly and Organization, Cellular Development, Cellular Functi    | branching                     | branching of neurites                      | 3.04E-17 |
| Developmental Disorder                                                                        | multiple congenital anomalies | multiple congenital anomalies              | 3.05E-17 |
| Cellular Development, Cellular Growth and Proliferation, Hematological System Developme       | development                   | development of blood cells                 | 3.87E-17 |
| Post-Translational Modification                                                               | phosphorylation               | phosphorylation of protein                 | 3.87E-17 |
| Dermatological Diseases and Conditions, Organismal Injury and Abnormalities                   | skin lesion                   | skin lesion                                | 4.04E-17 |
| Cellular Development, Cellular Growth and Proliferation, Hematological System Developme       | development                   | development of mononuclear leukocytes      | 4.42E-17 |
| Hematological System Development and Function, Lymphoid Tissue Structure and Developi         | quantity                      | quantity of lymphocytes                    | 4.97E-17 |
| Organismal Injury and Abnormalities, Reproductive System Development and Function, Rep        | abnormal morphology           | abnormal morphology of reproductive system | 5.89E-17 |
| Cardiovascular System Development and Function, Cellular Movement                             | migration                     | migration of endothelial cells             | 6.33E-17 |
| Tissue Development                                                                            | formation                     | formation of gland                         | 8.58E-17 |
| Cellular Development, Cellular Growth and Proliferation, Embryonic Development, Hemato        | development                   | development of lymphocytes                 | 1.04E-16 |
| Cancer, Dermatological Diseases and Conditions, Organismal Injury and Abnormalities           | skin tumor                    | skin tumor                                 | 1.09E-16 |
| Cellular Development                                                                          | differentiation               | differentiation of lymphatic system cells  | 1.44E-16 |
| Hematological System Development and Function, Lymphoid Tissue Structure and Developi         | morphology                    | morphology of lymphoid organ               | 1.60E-16 |
| Cellular Development, Tissue Development                                                      | differentiation               | differentiation of epithelial cells        | 1.60E-16 |
| Embryonic Development, Organ Development, Organismal Development, Skeletal and Mus            | formation                     | formation of muscle                        | 1.79E-16 |
| Cell Death and Survival                                                                       | cell death                    | cell death of blood cells                  | 1.84E-16 |
| Cancer, Organismal Injury and Abnormalities                                                   | cancer                        | cancer of secretory structure              | 2.09E-16 |
| Hereditary Disorder, Organismal Injury and Abnormalities                                      | autosomal dominant disease    | autosomal dominant disease                 | 2.45E-16 |
| Cell Morphology                                                                               | morphology                    | morphology of cellular protrusions         | 2.95E-16 |
| Cellular Function and Maintenance                                                             | homeostasis                   | homeostasis of blood cells                 | 3.38E-16 |
| Cellular Development, Nervous System Development and Function                                 | differentiation               | differentiation of neuroglia               | 3.89E-16 |
| Cellular Development, Cellular Growth and Proliferation, Hematological System Developme       | development                   | development of leukocytes                  | 4.18E-16 |
| Hematological System Development and Function, Lymphoid Tissue Structure and Developi         | morphology                    | morphology of lymphoid tissue              | 4.80E-16 |
| Cell-To-Cell Signaling and Interaction, Cellular Assembly and Organization, Cellular Function | assembly                      | assembly of intercellular junctions        | 5.12E-16 |
| Cancer, Organismal Injury and Abnormalities                                                   | ductal carcinoma              | ductal carcinoma                           | 5.41E-16 |
| Cardiovascular System Development and Function, Tissue Morphology                             | morphology                    | morphology of blood vessel                 | 6.19E-16 |
| Cancer, Organismal Injury and Abnormalities                                                   | urogenital cancer             | urogenital cancer                          | 7.26E-16 |
| Cellular Function and Maintenance                                                             | homeostasis                   | Lymphocyte homeostasis                     | 8.21E-16 |
| Cellular Assembly and Organization                                                            | formation                     | formation of plasma membrane               | 8.44E-16 |
| Cellular Assembly and Organization                                                            | formation                     | formation of cellular membrane             | 8.55E-16 |
| Hematological System Development and Function, Lymphoid Tissue Structure and Developi         | quantity                      | quantity of T lymphocytes                  | 1.08E-15 |
| Cancer, Dermatological Diseases and Conditions, Organismal Injury and Abnormalities           | skin cancer                   | skin cancer                                | 1.09E-15 |
| Cancer, Neurological Disease, Organismal Injury and Abnormalities                             | central nervous system cancer | central nervous system cancer              | 1.15E-15 |
| Cardiovascular Disease, Cardiovascular System Development and Function                        | abnormal morphology           | abnormal morphology of vasculature         | 1.16E-15 |
| Skeletal and Muscular System Development and Function                                         | morphology                    | morphology of muscle                       | 1.55E-15 |
| Embryonic Development, Organismal Development, Tissue Development                             | growth                        | growth of embryonic tissue                 | 1.55E-15 |
| Cellular Development, Hematological System Development and Function, Hematopoiesis, L         | differentiation               | differentiation of leukocytes              | 1.73E-15 |
| Cellular Movement                                                                             | invasion                      | invasion of carcinoma cell lines           | 1.79E-15 |
| Cancer, Organismal Injury and Abnormalities, Reproductive System Disease                      | tumorigenesis                 | tumorigenesis of genital organ             | 2.23E-15 |

|                                                                                                                                                                                                                     |                                           |                                            |          |
|---------------------------------------------------------------------------------------------------------------------------------------------------------------------------------------------------------------------|-------------------------------------------|--------------------------------------------|----------|
| Cellular Development, Cellular Growth and Proliferation, Hematological System Development and Function, Organismal Injury and Abnormalities, Reproductive System Disease                                            | cell proliferation                        | cell proliferation of T lymphocytes        | 2.37E-15 |
| Cancer, Organismal Injury and Abnormalities, Reproductive System Disease                                                                                                                                            | genital tumor                             | genital tumor                              | 2.63E-15 |
| Neurological Disease, Organismal Injury and Abnormalities                                                                                                                                                           | seizures                                  | seizures                                   | 2.74E-15 |
| Cell Morphology, Nervous System Development and Function, Neurological Disease, Tissue Development and Function, Organismal Injury and Abnormalities, Skeletal and Muscular System Development and Function         | abnormal morphology                       | abnormal morphology of neurites            | 2.77E-15 |
| Connective Tissue Disorders, Organismal Injury and Abnormalities, Skeletal and Muscular System Development and Function                                                                                             | abnormal morphology                       | abnormal morphology of axial skeleton      | 2.96E-15 |
| Organismal Injury and Abnormalities                                                                                                                                                                                 | cytosis                                   | Cytosis                                    | 3.09E-15 |
| Skeletal and Muscular System Development and Function                                                                                                                                                               | morphology                                | morphology of axial skeleton               | 3.63E-15 |
| Cellular Development                                                                                                                                                                                                | maturation                                | maturation of cells                        | 4.26E-15 |
| Cell-To-Cell Signaling and Interaction, Cellular Assembly and Organization, Cellular Function and Maintenance, Hematological System Development and Function, Tissue Development                                    | development                               | development of gap junctions               | 4.27E-15 |
| Connective Tissue Development and Function, Tissue Development                                                                                                                                                      | development                               | development of connective tissue           | 4.65E-15 |
| Hematological System Development and Function, Hematopoiesis, Tissue Morphology                                                                                                                                     | quantity                                  | quantity of hematopoietic cells            | 4.78E-15 |
| Cellular Development, Nervous System Development and Function                                                                                                                                                       | differentiation                           | differentiation of astrocytes              | 4.86E-15 |
| Cell Death and Survival, Organismal Injury and Abnormalities, Renal and Urological Disease                                                                                                                          | necrosis                                  | necrosis of kidney                         | 5.09E-15 |
| Neurological Disease, Skeletal and Muscular Disorders                                                                                                                                                               | neuromuscular disease                     | neuromuscular disease                      | 5.45E-15 |
| Cancer, Endocrine System Disorders, Gastrointestinal Disease, Organismal Injury and Abnormalities                                                                                                                   | pancreatic tumor                          | pancreatic tumor                           | 5.80E-15 |
| Embryonic Development, Organismal Development, Tissue Morphology                                                                                                                                                    | size                                      | size of embryo                             | 6.74E-15 |
| Cell Morphology                                                                                                                                                                                                     | shape change                              | shape change of axons                      | 7.82E-15 |
| Cell-To-Cell Signaling and Interaction, Cellular Assembly and Organization, Cellular Development and Function, Organismal Injury and Abnormalities, Nervous System Development and Function                         | developmental process                     | developmental process of synapse           | 8.19E-15 |
| Cellular Movement, Nervous System Development and Function                                                                                                                                                          | guidance                                  | guidance of axons                          | 8.28E-15 |
| Cell Cycle                                                                                                                                                                                                          | S phase                                   | S phase                                    | 8.34E-15 |
| Cell-mediated Immune Response, Cellular Function and Maintenance, Hematological System Development and Function, Organismal Injury and Abnormalities                                                                | homeostasis                               | T cell homeostasis                         | 8.89E-15 |
| Cancer, Organismal Injury and Abnormalities                                                                                                                                                                         | breast or ovarian carcinoma               | breast or ovarian carcinoma                | 9.89E-15 |
| Cancer, Organismal Injury and Abnormalities                                                                                                                                                                         | neoplasia                                 | neoplasia of cells                         | 9.96E-15 |
| Hematological System Development and Function, Hematopoiesis, Tissue Morphology                                                                                                                                     | quantity                                  | quantity of hematopoietic progenitor cells | 1.03E-14 |
| Organismal Development, Tissue Development                                                                                                                                                                          | development                               | development of exocrine gland              | 1.05E-14 |
| Cell Death and Survival, Organismal Injury and Abnormalities                                                                                                                                                        | cell death                                | cell death of epithelial cell lines        | 1.20E-14 |
| Cell Death and Survival                                                                                                                                                                                             | cell death                                | cell death of lymphatic system cells       | 1.59E-14 |
| Embryonic Development, Nervous System Development and Function, Organ Development and Function, Organismal Injury and Abnormalities                                                                                 | formation                                 | formation of forebrain                     | 1.63E-14 |
| Cancer, Gastrointestinal Disease, Organismal Injury and Abnormalities                                                                                                                                               | stomach tumor                             | stomach tumor                              | 2.04E-14 |
| Cancer, Organismal Injury and Abnormalities                                                                                                                                                                         | benign connective or soft tissue neoplasm | benign connective or soft tissue neoplasm  | 2.18E-14 |
| Cell Morphology                                                                                                                                                                                                     | size                                      | size of cells                              | 2.42E-14 |
| Cell Signaling                                                                                                                                                                                                      | protein kinase cascade                    | protein kinase cascade                     | 2.64E-14 |
| Cellular Development, Cellular Growth and Proliferation, Hematological System Development and Function, Organismal Injury and Abnormalities, Nervous System Development and Function                                | proliferation                             | proliferation of hematopoietic cells       | 3.25E-14 |
| Cellular Development, Cellular Growth and Proliferation, Hair and Skin Development and Function, Organismal Injury and Abnormalities, Nervous System Development and Function                                       | proliferation                             | proliferation of epithelial cell lines     | 3.72E-14 |
| Connective Tissue Disorders, Developmental Disorder, Gastrointestinal Disease, Organismal Injury and Abnormalities, Nervous System Development and Function                                                         | orofacial dysmorphism                     | orofacial dysmorphism                      | 3.98E-14 |
| Cancer, Endocrine System Disorders, Gastrointestinal Disease, Organismal Injury and Abnormalities                                                                                                                   | pancreatic cancer                         | pancreatic cancer                          | 4.45E-14 |
| Cell Death and Survival                                                                                                                                                                                             | cell death                                | cell death of immune cells                 | 4.46E-14 |
| Organismal Development                                                                                                                                                                                              | morphology                                | morphology of face                         | 5.12E-14 |
| Cell Cycle                                                                                                                                                                                                          | interphase                                | arrest in interphase                       | 5.17E-14 |
| Behavior                                                                                                                                                                                                            | learning                                  | learning                                   | 5.67E-14 |
| Cancer, Endocrine System Disorders, Gastrointestinal Disease, Organismal Injury and Abnormalities                                                                                                                   | carcinoma                                 | carcinoma in pancreas                      | 5.75E-14 |
| Cancer, Organismal Injury and Abnormalities                                                                                                                                                                         | tumor                                     | tumor in nervous system                    | 5.78E-14 |
| Organ Morphology                                                                                                                                                                                                    | abnormal morphology                       | abnormal morphology of gland               | 5.95E-14 |
| Hematological System Development and Function, Hematopoiesis                                                                                                                                                        | development                               | development of hematopoietic system        | 5.95E-14 |
| Cell Death and Survival, Organismal Injury and Abnormalities, Renal and Urological Disease                                                                                                                          | cell death                                | cell death of kidney cells                 | 5.96E-14 |
| Cell-mediated Immune Response, Cellular Development, Cellular Function and Maintenance, Hematological System Development and Function, Organismal Injury and Abnormalities, Nervous System Development and Function | development                               | T cell development                         | 6.25E-14 |

|                                                                                                                               |                                         |                                                   |          |
|-------------------------------------------------------------------------------------------------------------------------------|-----------------------------------------|---------------------------------------------------|----------|
| Organismal Development                                                                                                        | size                                    | size of animal                                    | 7.20E-14 |
| Behavior                                                                                                                      | cognition                               | cognition                                         | 7.38E-14 |
| Embryonic Development, Nervous System Development and Function, Organ Development                                             | formation                               | formation of rhombencephalon                      | 7.47E-14 |
| Organ Morphology                                                                                                              | morphology                              | morphology of gland                               | 7.54E-14 |
| Cellular Development, Hematological System Development and Function, Hematopoiesis                                            | differentiation                         | differentiation of hematopoietic cells            | 8.02E-14 |
| Cancer, Gastrointestinal Disease, Organismal Injury and Abnormalities                                                         | gastric cancer                          | gastric cancer                                    | 8.48E-14 |
| Cancer, Organismal Injury and Abnormalities                                                                                   | pelvic cancer                           | pelvic cancer                                     | 9.60E-14 |
| Cancer, Organismal Injury and Abnormalities, Reproductive System Disease                                                      | tumorigenesis                           | tumorigenesis of reproductive tract               | 1.14E-13 |
| Cancer, Organismal Injury and Abnormalities, Reproductive System Disease                                                      | benign neoplasm of female genital organ | benign neoplasm of female genital organ           | 1.32E-13 |
| Connective Tissue Disorders, Developmental Disorder, Gastrointestinal Disease, Organismal Injury and Abnormalities            | congenital malformation                 | congenital malformation of face                   | 1.39E-13 |
| Cancer, Endocrine System Disorders, Organismal Injury and Abnormalities                                                       | endocrine gland tumor                   | endocrine gland tumor                             | 1.40E-13 |
| Cancer, Organismal Injury and Abnormalities, Reproductive System Disease                                                      | female genital neoplasm                 | female genital neoplasm                           | 1.43E-13 |
| Cancer, Organismal Injury and Abnormalities                                                                                   | pelvic tumor                            | pelvic tumor                                      | 1.47E-13 |
| Cellular Development, Hematological System Development and Function, Hematopoiesis                                            | differentiation                         | differentiation of hematopoietic progenitor cells | 1.53E-13 |
| Connective Tissue Disorders, Developmental Disorder, Gastrointestinal Disease, Organismal Injury and Abnormalities            | orofacial cleft                         | orofacial cleft                                   | 1.54E-13 |
| Embryonic Development, Organ Development, Organismal Development, Reproductive System Disease                                 | formation                               | formation of mammary gland                        | 1.54E-13 |
| Cancer, Organismal Injury and Abnormalities                                                                                   | connective tissue tumor                 | connective tissue tumor                           | 1.56E-13 |
| Endocrine System Disorders, Gastrointestinal Disease, Organismal Injury and Abnormalities                                     | pancreatic duct disorder                | pancreatic duct disorder                          | 1.70E-13 |
| Cell Cycle                                                                                                                    | interphase                              | interphase of tumor cell lines                    | 1.73E-13 |
| Organismal Development                                                                                                        | development                             | development of endocrine gland                    | 1.93E-13 |
| Cancer, Organismal Injury and Abnormalities, Reproductive System Disease                                                      | carcinoma                               | carcinoma in breast                               | 1.96E-13 |
| Cancer, Cell Death and Survival, Organismal Injury and Abnormalities, Tumor Morphology                                        | cell death                              | cell death of cancer cells                        | 2.17E-13 |
| Hematological System Development and Function, Lymphoid Tissue Structure and Development                                      | morphology                              | morphology of secondary lymphoid organ            | 2.34E-13 |
| Cancer, Endocrine System Disorders, Gastrointestinal Disease, Organismal Injury and Abnormalities                             | pancreatic ductal adenocarcinoma        | pancreatic ductal adenocarcinoma                  | 2.38E-13 |
| Cancer, Endocrine System Disorders, Gastrointestinal Disease, Organismal Injury and Abnormalities                             | pancreatic adenocarcinoma               | pancreatic adenocarcinoma                         | 2.39E-13 |
| Cardiovascular System Development and Function, Cellular Movement                                                             | movement                                | movement of vascular endothelial cells            | 2.58E-13 |
| Cell-To-Cell Signaling and Interaction, Nervous System Development and Function                                               | neurotransmission                       | neurotransmission                                 | 2.61E-13 |
| Cancer, Neurological Disease, Organismal Injury and Abnormalities                                                             | central nervous system tumor            | central nervous system tumor                      | 2.64E-13 |
| Embryonic Development                                                                                                         | quantity                                | quantity of embryo                                | 2.67E-13 |
| Cellular Development, Cellular Growth and Proliferation                                                                       | proliferation                           | proliferation of stem cells                       | 2.74E-13 |
| Cell Morphology, Cellular Assembly and Organization, Cellular Development, Cellular Function                                  | branching                               | branching of axons                                | 2.85E-13 |
| Cellular Development, Hematological System Development and Function, Hematopoiesis, Lymphoid Tissue Structure and Development | differentiation                         | differentiation of lymphocytes                    | 2.86E-13 |
| Cellular Growth and Proliferation                                                                                             | proliferation                           | arrest in proliferation of cells                  | 2.87E-13 |
| Cancer                                                                                                                        | hyperplasia                             | hyperplasia of tissue                             | 2.87E-13 |
| Cellular Development, Cellular Growth and Proliferation                                                                       | cell proliferation                      | cell proliferation of carcinoma cell lines        | 3.16E-13 |
| Cancer, Gastrointestinal Disease, Organismal Injury and Abnormalities                                                         | gastroesophageal cancer                 | gastroesophageal cancer                           | 3.61E-13 |
| Cancer, Organismal Injury and Abnormalities, Skeletal and Muscular Disorders                                                  | muscle tumor                            | muscle tumor                                      | 3.74E-13 |
| Cardiovascular System Development and Function, Cellular Movement                                                             | migration                               | migration of vascular endothelial cells           | 3.76E-13 |
| Connective Tissue Disorders, Developmental Disorder, Gastrointestinal Disease, Organismal Injury and Abnormalities            | cleft palate syndrome                   | cleft palate syndrome                             | 4.03E-13 |
| Cancer, Dermatological Diseases and Conditions, Organismal Injury and Abnormalities                                           | malignant cutaneous melanoma cancer     | malignant cutaneous melanoma cancer               | 4.04E-13 |
| Auditory and Vestibular System Development and Function, Embryonic Development, Organ Development                             | development                             | development of ear                                | 4.32E-13 |
| Molecular Transport, Protein Trafficking                                                                                      | internalization                         | internalization of protein                        | 4.42E-13 |
| Nervous System Development and Function, Organ Morphology, Organismal Development                                             | morphology                              | morphology of rhombencephalon                     | 4.77E-13 |
| Cellular Development, Cellular Growth and Proliferation, Hematological System Development and Function                        | proliferation                           | proliferation of hematopoietic progenitor cells   | 4.89E-13 |
| Neurological Disease, Organismal Injury and Abnormalities, Psychological Disorders                                            | disorder of basal ganglia               | disorder of basal ganglia                         | 4.91E-13 |
| Cancer, Organismal Injury and Abnormalities                                                                                   | sarcoma                                 | sarcoma                                           | 4.99E-13 |

|                                                                                                                              |                                              |                                              |          |
|------------------------------------------------------------------------------------------------------------------------------|----------------------------------------------|----------------------------------------------|----------|
| Cellular Development, Cellular Growth and Proliferation                                                                      | proliferation                                | proliferation of leukemia cell lines         | 5.47E-13 |
| Cellular Development, Embryonic Development, Organismal Development                                                          | differentiation                              | differentiation of embryonic cells           | 5.69E-13 |
| Hematological System Development and Function, Lymphoid Tissue Structure and Development                                     | morphology                                   | morphology of spleen                         | 5.70E-13 |
| Cancer, Cellular Development, Cellular Growth and Proliferation, Organismal Injury and Abnormalities                         | proliferation                                | proliferation of tumor cells                 | 5.95E-13 |
| Embryonic Development, Organismal Development                                                                                | morphogenesis                                | morphogenesis of embryo                      | 6.63E-13 |
| Hair and Skin Development and Function, Organ Development                                                                    | growth                                       | growth of skin                               | 6.63E-13 |
| Neurological Disease, Organismal Injury and Abnormalities, Psychological Disorders                                           | dementia                                     | Dementia                                     | 6.98E-13 |
| Cell Cycle                                                                                                                   | cell cycle progression                       | arrest in cell cycle progression             | 7.32E-13 |
| Amino Acid Metabolism, Post-Translational Modification, Small Molecule Biochemistry                                          | phosphorylation                              | phosphorylation of L-amino acid              | 7.70E-13 |
| Developmental Disorder                                                                                                       | hypertrophy                                  | Hypertrophy                                  | 7.87E-13 |
| Embryonic Development, Nervous System Development and Function, Organ Development                                            | formation                                    | formation of cerebellum                      | 7.96E-13 |
| Nervous System Development and Function, Organ Morphology, Tissue Morphology                                                 | quantity                                     | quantity of brain cells                      | 7.96E-13 |
| Cellular Movement, Hematological System Development and Function, Immune Cell Traffic                                        | cell movement                                | cell movement of leukocytes                  | 8.48E-13 |
| Cellular Development, Hematological System Development and Function, Hematopoiesis, Lymphoid Tissue Development and Function | differentiation                              | differentiation of mononuclear leukocytes    | 8.70E-13 |
| Cancer, Organismal Injury and Abnormalities, Tumor Morphology                                                                | progression                                  | progression of tumor                         | 9.76E-13 |
| Skeletal and Muscular Disorders, Skeletal and Muscular System Development and Function                                       | abnormal morphology                          | abnormal morphology of muscle                | 9.99E-13 |
| Cancer, Organismal Injury and Abnormalities                                                                                  | malignant solid tumor                        | advanced malignant solid tumor               | 1.02E-12 |
| Cancer, Organismal Injury and Abnormalities, Reproductive System Disease                                                     | genital tract cancer                         | genital tract cancer                         | 1.05E-12 |
| Embryonic Development, Organ Development, Organismal Development, Respiratory System Development and Function                | formation                                    | formation of lung                            | 1.07E-12 |
| Cellular Development, Embryonic Development, Hair and Skin Development and Function, Organ Development                       | differentiation                              | differentiation of skin                      | 1.09E-12 |
| Digestive System Development and Function, Hepatic System Development and Function, Organ Development                        | morphology                                   | morphology of liver                          | 1.10E-12 |
| Cell Death and Survival                                                                                                      | apoptosis                                    | apoptosis of lymphatic system cells          | 1.11E-12 |
| Cancer, Organismal Injury and Abnormalities                                                                                  | tumorigenesis                                | tumorigenesis of malignant tumor             | 1.11E-12 |
| Cancer, Hematological Disease, Immunological Disease, Organismal Injury and Abnormalities                                    | lymphocytic cancer                           | lymphocytic cancer                           | 1.11E-12 |
| Hematological System Development and Function, Immunological Disease, Lymphoid Tissue Development and Function               | abnormal morphology                          | abnormal morphology of lymphoid organ        | 1.22E-12 |
| Cancer, Organismal Injury and Abnormalities                                                                                  | mesenchymal tumor                            | mesenchymal tumor                            | 1.25E-12 |
| Organismal Development                                                                                                       | size                                         | size of head                                 | 1.38E-12 |
| Cancer, Organismal Injury and Abnormalities                                                                                  | cancer                                       | cancer of cells                              | 1.62E-12 |
| Cancer, Hematological Disease, Organismal Injury and Abnormalities                                                           | B-cell neoplasm                              | B-cell neoplasm                              | 1.77E-12 |
| Nervous System Development and Function, Organ Morphology, Organismal Development                                            | morphology                                   | morphology of cerebellum                     | 1.77E-12 |
| Cellular Movement                                                                                                            | invasion                                     | invasion of breast cancer cell lines         | 1.99E-12 |
| Cancer, Cell Death and Survival, Organismal Injury and Abnormalities, Tumor Morphology                                       | cell death                                   | cell death of tumor cells                    | 2.05E-12 |
| Skeletal and Muscular System Development and Function                                                                        | development                                  | development of axial skeleton                | 2.12E-12 |
| Molecular Transport, Protein Trafficking                                                                                     | transport                                    | transport of protein                         | 2.15E-12 |
| Cell Death and Survival                                                                                                      | cell death                                   | cell death of fibroblast cell lines          | 2.15E-12 |
| Cell Morphology, Nervous System Development and Function, Tissue Morphology                                                  | morphology                                   | morphology of axons                          | 2.17E-12 |
| Cancer, Organismal Injury and Abnormalities                                                                                  | malignant connective or soft tissue neoplasm | malignant connective or soft tissue neoplasm | 2.23E-12 |
| Cell Death and Survival, Organismal Injury and Abnormalities, Renal and Urological Disease                                   | cell death                                   | cell death of kidney cell lines              | 2.30E-12 |
| Developmental Disorder, Neurological Disease, Organismal Injury and Abnormalities                                            | congenital encephalopathy                    | congenital encephalopathy                    | 2.49E-12 |
| Neurological Disease, Organismal Injury and Abnormalities, Psychological Disorders                                           | tauopathy                                    | tauopathy                                    | 2.59E-12 |
| Nervous System Development and Function, Neurological Disease, Organ Morphology, Organ Development                           | abnormal morphology                          | abnormal morphology of rhombencephalon       | 2.66E-12 |
| Cancer, Organismal Injury and Abnormalities, Skeletal and Muscular Disorders                                                 | smooth muscle tumor                          | smooth muscle tumor                          | 2.74E-12 |
| Cell Death and Survival                                                                                                      | apoptosis                                    | apoptosis of blood cells                     | 2.85E-12 |
| Cellular Movement                                                                                                            | cell movement                                | cell movement of blood cells                 | 3.00E-12 |
| Metabolic Disease                                                                                                            | glucose metabolism disorder                  | glucose metabolism disorder                  | 3.10E-12 |
| Cancer, Cell Death and Survival, Organismal Injury and Abnormalities, Tumor Morphology                                       | necrosis                                     | necrosis of tumor                            | 3.12E-12 |

|                                                                                                                           |                                 |                                                |          |
|---------------------------------------------------------------------------------------------------------------------------|---------------------------------|------------------------------------------------|----------|
| Cancer, Organismal Injury and Abnormalities                                                                               | growth                          | growth of malignant tumor                      | 3.23E-12 |
| Neurological Disease, Organismal Injury and Abnormalities                                                                 | epilepsy                        | epilepsy                                       | 3.38E-12 |
| Cancer, Organismal Injury and Abnormalities                                                                               | serous neoplasm                 | serous neoplasm                                | 3.56E-12 |
| Respiratory System Development and Function                                                                               | morphology                      | morphology of respiratory system               | 3.57E-12 |
| Cancer, Endocrine System Disorders, Organismal Injury and Abnormalities, Reproductive System Development and Function     | gonadal tumor                   | gonadal tumor                                  | 3.64E-12 |
| Lipid Metabolism, Molecular Transport, Small Molecule Biochemistry                                                        | concentration                   | concentration of lipid                         | 3.90E-12 |
| Cardiovascular System Development and Function, Organ Morphology, Organismal Development and Function                     | morphology                      | morphology of heart ventricle                  | 4.00E-12 |
| Nervous System Development and Function, Neurological Disease, Organ Morphology, Organismal Injury and Abnormalities      | abnormal morphology             | abnormal morphology of cerebellum              | 4.10E-12 |
| Skeletal and Muscular System Development and Function                                                                     | morphogenesis                   | morphogenesis of skeletal system               | 4.13E-12 |
| Cell-To-Cell Signaling and Interaction, Nervous System Development and Function                                           | potentiation                    | potentiation of synapse                        | 4.34E-12 |
| Developmental Disorder, Neurological Disease, Organismal Injury and Abnormalities                                         | congenital malformation         | congenital malformation of brain               | 4.38E-12 |
| Cellular Movement, Immune Cell Trafficking                                                                                | migration                       | leukocyte migration                            | 4.71E-12 |
| Cellular Movement                                                                                                         | homing                          | homing of cells                                | 4.83E-12 |
| Lymphoid Tissue Structure and Development, Organ Morphology, Tissue Morphology                                            | quantity                        | quantity of lymphoid organ                     | 4.94E-12 |
| Cell Morphology, Nervous System Development and Function                                                                  | innervation                     | innervation                                    | 5.00E-12 |
| Cellular Movement                                                                                                         | cell movement                   | cell movement of melanoma cell lines           | 5.08E-12 |
| Cell Death and Survival                                                                                                   | cell death                      | cell death of lymphoid cells                   | 5.19E-12 |
| Cellular Development, Cellular Growth and Proliferation                                                                   | cell proliferation              | cell proliferation of breast cancer cell lines | 5.33E-12 |
| Organismal Injury and Abnormalities, Tissue Morphology                                                                    | abnormal morphology             | abnormal morphology of epithelial tissue       | 5.61E-12 |
| Infectious Diseases                                                                                                       | infection                       | infection by RNA virus                         | 5.62E-12 |
| Embryonic Development, Organismal Development, Tissue Development                                                         | closure                         | closure of embryonic tissue                    | 6.25E-12 |
| Reproductive System Development and Function                                                                              | fertility                       | fertility                                      | 6.26E-12 |
| Cell Cycle                                                                                                                | cleavage                        | cleavage of cells                              | 6.80E-12 |
| Metabolic Disease                                                                                                         | amyloidosis                     | amyloidosis                                    | 6.83E-12 |
| Cancer, Gastrointestinal Disease, Organismal Injury and Abnormalities                                                     | gastric epithelial cancer       | gastric epithelial cancer                      | 6.89E-12 |
| Cancer, Gastrointestinal Disease, Organismal Injury and Abnormalities                                                     | gastro-esophageal carcinoma     | gastro-esophageal carcinoma                    | 6.97E-12 |
| Cancer, Organismal Injury and Abnormalities                                                                               | serous adenocarcinoma           | serous adenocarcinoma                          | 7.13E-12 |
| Cancer, Organismal Injury and Abnormalities                                                                               | transformation                  | transformation of fibroblasts                  | 7.16E-12 |
| Cell-To-Cell Signaling and Interaction, Cellular Assembly and Organization, Cellular Function                             | formation                       | formation of focal adhesions                   | 7.17E-12 |
| Connective Tissue Development and Function, Organismal Development, Skeletal and Muscular System Development and Function | morphology                      | morphology of skull                            | 7.36E-12 |
| Gastrointestinal Disease, Organismal Injury and Abnormalities                                                             | benign oral disorder            | benign oral disorder                           | 7.54E-12 |
| Cellular Development, Cellular Growth and Proliferation                                                                   | proliferation                   | proliferation of prostate cancer cell lines    | 7.65E-12 |
| Cell-To-Cell Signaling and Interaction, Nervous System Development and Function                                           | long-term potentiation          | long-term potentiation                         | 7.72E-12 |
| Cell Death and Survival, Organismal Injury and Abnormalities                                                              | apoptosis                       | apoptosis of epithelial cell lines             | 8.39E-12 |
| Embryonic Development, Hematological System Development and Function, Lymphoid Tissue Development and Function            | formation                       | formation of lymphoid tissue                   | 8.55E-12 |
| Skeletal and Muscular System Development and Function                                                                     | fusion                          | fusion of bone                                 | 8.56E-12 |
| Cancer, Neurological Disease, Organismal Injury and Abnormalities                                                         | primitive neuroectodermal tumor | primitive neuroectodermal tumor                | 8.60E-12 |
| Cancer, Hematological Disease, Immunological Disease, Organismal Injury and Abnormalities                                 | lymphocytic leukemia            | lymphocytic leukemia                           | 8.69E-12 |
| Cell Death and Survival                                                                                                   | cell death                      | cell death of lymphocytes                      | 8.77E-12 |
| Cell Death and Survival                                                                                                   | apoptosis                       | apoptosis of connective tissue cells           | 8.90E-12 |
| Cellular Development, Connective Tissue Development and Function, Hematological System Development and Function           | differentiation                 | differentiation of red blood cells             | 9.10E-12 |
| Neurological Disease                                                                                                      | neurological signs              | neurological signs                             | 9.43E-12 |
| Metabolic Disease, Neurological Disease, Organismal Injury and Abnormalities, Psychological Disorder                      | Alzheimer disease               | Alzheimer disease                              | 9.58E-12 |
| Cancer, Organismal Injury and Abnormalities                                                                               | fibrous tissue tumor            | fibrous tissue tumor                           | 9.91E-12 |
| DNA Replication, Recombination, and Repair                                                                                | synthesis                       | synthesis of DNA                               | 1.02E-11 |
| Endocrine System Disorders, Organismal Injury and Abnormalities, Reproductive System Development and Function             | ovarian lesion                  | ovarian lesion                                 | 1.10E-11 |

|                                                                                                                                                                                       |                                                  |                                                  |          |
|---------------------------------------------------------------------------------------------------------------------------------------------------------------------------------------|--------------------------------------------------|--------------------------------------------------|----------|
| Cell Morphology, Tissue Morphology                                                                                                                                                    | morphology                                       | morphology of connective tissue cells            | 1.10E-11 |
| Cellular Development                                                                                                                                                                  | differentiation                                  | differentiation of stem cells                    | 1.13E-11 |
| Connective Tissue Development and Function, Tissue Morphology                                                                                                                         | quantity                                         | quantity of connective tissue                    | 1.13E-11 |
| Embryonic Development, Organismal Development, Skeletal and Muscular System Development and Function                                                                                  | development                                      | development of forelimb                          | 1.26E-11 |
| Organismal Development, Renal and Urological System Development and Function                                                                                                          | development                                      | development of urinary tract                     | 1.28E-11 |
| Organ Morphology, Organismal Injury and Abnormalities, Reproductive System Development and Function                                                                                   | abnormal morphology                              | abnormal morphology of genital organ             | 1.30E-11 |
| Organ Morphology, Reproductive System Development and Function                                                                                                                        | morphology                                       | morphology of genital organ                      | 1.35E-11 |
| Embryonic Development, Organ Development, Organismal Development, Renal and Urological System Development and Function                                                                | formation                                        | formation of kidney                              | 1.37E-11 |
| Cancer, Organismal Injury and Abnormalities                                                                                                                                           | genitourinary carcinoma                          | genitourinary carcinoma                          | 1.38E-11 |
| Lymphoid Tissue Structure and Development, Tissue Morphology                                                                                                                          | quantity                                         | quantity of lymphoid tissue                      | 1.46E-11 |
| Cancer, Hematological Disease, Immunological Disease, Organismal Injury and Abnormalities                                                                                             | leukemia                                         | leukemia                                         | 1.47E-11 |
| Cellular Development, Skeletal and Muscular System Development and Function, Tissue Development and Function                                                                          | differentiation                                  | differentiation of muscle                        | 1.51E-11 |
| Cancer, Endocrine System Disorders, Organismal Injury and Abnormalities, Reproductive System Development and Function                                                                 | neoplasia                                        | Ovarian Cancer and Tumors                        | 1.54E-11 |
| Cancer, Organismal Injury and Abnormalities                                                                                                                                           | thoracic cancer                                  | thoracic cancer                                  | 1.65E-11 |
| Cancer, Organismal Injury and Abnormalities                                                                                                                                           | metastatic solid tumor                           | metastatic solid tumor                           | 1.66E-11 |
| Cancer, Organismal Injury and Abnormalities                                                                                                                                           | thoracic neoplasm                                | thoracic neoplasm                                | 1.67E-11 |
| Connective Tissue Development and Function, Nervous System Development and Function, Cellular Development, Cellular Growth and Proliferation, Nervous System Development and Function | morphology                                       | morphology of vertebrae                          | 1.71E-11 |
| Cellular Development, Cellular Growth and Proliferation, Nervous System Development and Function                                                                                      | growth                                           | growth of axons                                  | 1.72E-11 |
| Cell Cycle                                                                                                                                                                            | G1 phase                                         | G1 phase                                         | 1.75E-11 |
| Lipid Metabolism, Small Molecule Biochemistry                                                                                                                                         | synthesis                                        | synthesis of lipid                               | 1.85E-11 |
| Cancer, Gastrointestinal Disease, Organismal Injury and Abnormalities                                                                                                                 | upper gastrointestinal tract cancer              | upper gastrointestinal tract cancer              | 1.90E-11 |
| Molecular Transport                                                                                                                                                                   | secretion                                        | secretion of molecule                            | 1.95E-11 |
| Cellular Function and Maintenance                                                                                                                                                     | endocytosis                                      | endocytosis                                      | 2.03E-11 |
| Neurological Disease                                                                                                                                                                  | neurodegeneration                                | Neurodegeneration                                | 2.05E-11 |
| Cell Morphology, Tissue Development                                                                                                                                                   | tubulation                                       | tubulation of cells                              | 2.06E-11 |
| Nervous System Development and Function, Tissue Morphology                                                                                                                            | quantity                                         | quantity of central nervous system cells         | 2.08E-11 |
| Organismal Injury and Abnormalities                                                                                                                                                   | bleeding                                         | Bleeding                                         | 2.33E-11 |
| Cell-To-Cell Signaling and Interaction                                                                                                                                                | adhesion                                         | adhesion of connective tissue cells              | 2.47E-11 |
| Cell Death and Survival                                                                                                                                                               | degradation                                      | cellular degradation                             | 2.55E-11 |
| Cancer, Endocrine System Disorders, Organismal Injury and Abnormalities, Reproductive System Development and Function                                                                 | ovarian cancer                                   | ovarian cancer                                   | 2.61E-11 |
| Cellular Growth and Proliferation                                                                                                                                                     | colony formation                                 | colony formation of tumor cell lines             | 2.63E-11 |
| Cancer, Neurological Disease, Organismal Injury and Abnormalities                                                                                                                     | glioma cancer                                    | glioma cancer                                    | 2.66E-11 |
| Embryonic Development, Endocrine System Development and Function, Organ Development and Function                                                                                      | development                                      | development of pituitary gland                   | 2.67E-11 |
| Cell Death and Survival, Cellular Function and Maintenance                                                                                                                            | self-renewal                                     | self-renewal of cells                            | 2.72E-11 |
| Cell Death and Survival                                                                                                                                                               | cell death                                       | cell death of mononuclear leukocytes             | 2.74E-11 |
| Cell Signaling                                                                                                                                                                        | cell surface receptor linked signal transduction | cell surface receptor linked signal transduction | 2.94E-11 |
| Connective Tissue Disorders, Organismal Injury and Abnormalities, Skeletal and Muscular System Development and Function                                                               | abnormality                                      | abnormality of rib cage                          | 2.96E-11 |
| Cellular Development, Connective Tissue Development and Function, Tissue Development and Function                                                                                     | differentiation                                  | differentiation of bone cells                    | 3.01E-11 |
| Cancer, Organismal Injury and Abnormalities, Reproductive System Development and Function                                                                                             | female genital tract cancer                      | female genital tract cancer                      | 3.15E-11 |
| Cellular Movement                                                                                                                                                                     | migration                                        | migration of melanoma cell lines                 | 3.17E-11 |
| Cancer, Organismal Injury and Abnormalities                                                                                                                                           | primary neoplasm                                 | primary neoplasm                                 | 3.18E-11 |
| Connective Tissue Disorders, Organismal Injury and Abnormalities, Skeletal and Muscular System Development and Function                                                               | abnormality                                      | abnormality of vertebrae                         | 3.31E-11 |
| Cancer, Organismal Injury and Abnormalities, Respiratory Disease                                                                                                                      | lung tumor                                       | lung tumor                                       | 3.39E-11 |
| Organ Morphology                                                                                                                                                                      | morphology                                       | morphology of skin                               | 3.39E-11 |
| Cardiovascular Disease, Organismal Injury and Abnormalities                                                                                                                           | abnormality                                      | abnormality of heart ventricle                   | 3.48E-11 |
| Cellular Development, Embryonic Development, Hair and Skin Development and Function, Cellular Growth and Proliferation, Nervous System Development and Function                       | differentiation                                  | differentiation of dermal cells                  | 3.52E-11 |

|                                                                                                           |                            |                                     |          |
|-----------------------------------------------------------------------------------------------------------|----------------------------|-------------------------------------|----------|
| Cellular Development, Cellular Growth and Proliferation, Connective Tissue Development and Function       | proliferation              | proliferation of keratinocytes      | 3.52E-11 |
| Cardiovascular Disease, Cardiovascular System Development and Function, Tissue Morphology and Development | abnormal morphology        | abnormal morphology of blood vessel | 3.52E-11 |
| Cancer, Organismal Injury and Abnormalities, Renal and Urological Disease                                 | urinary tract cancer       | urinary tract cancer                | 3.71E-11 |
| DNA Replication, Recombination, and Repair                                                                | metabolism                 | metabolism of DNA                   | 3.99E-11 |
| Cancer, Hematological Disease, Immunological Disease, Organismal Injury and Abnormalities                 | acute lymphocytic leukemia | acute lymphocytic leukemia          | 4.16E-11 |
| Cancer, Organismal Injury and Abnormalities                                                               | head and neck neoplasia    | head and neck neoplasia             | 4.19E-11 |
| Lipid Metabolism, Molecular Transport, Small Molecule Biochemistry                                        | quantity                   | quantity of steroid                 | 4.54E-11 |

| Upstream Regulator | Molecule Type                   | p-value of overlap |
|--------------------|---------------------------------|--------------------|
| TGFB1              | growth factor                   | 9.42E-28           |
| APP                | other                           | 1.42E-24           |
| TP53               | transcription regulator         | 6.01E-23           |
| ESR1               | ligand-dependent nuclear recept | 2.91E-21           |
| CTNNB1             | transcription regulator         | 1.68E-19           |
| TNF                | cytokine                        | 1.99E-18           |
| PDGF BB            | complex                         | 4.25E-17           |
| MYC                | transcription regulator         | 1.19E-16           |
| FGF2               | growth factor                   | 4.52E-15           |
| HRAS               | enzyme                          | 4.78E-15           |
| EGF                | growth factor                   | 5.34E-15           |
| IGF1               | growth factor                   | 5.42E-15           |
| AGT                | growth factor                   | 1.04E-14           |
| SOX2               | transcription regulator         | 2.72E-14           |
| ERBB2              | kinase                          | 5.46E-14           |
| KRAS               | enzyme                          | 6.73E-14           |
| WNT3A              | cytokine                        | 3.56E-13           |
| HTT                | transcription regulator         | 1.4E-12            |
| HIF1A              | transcription regulator         | 6.43E-12           |
| SHH                | peptidase                       | 6.79E-12           |
| WT1                | transcription regulator         | 1.17E-11           |
| NRG1               | growth factor                   | 2.52E-11           |
| CREB1              | transcription regulator         | 3.6E-11            |
| Histone h3         | group                           | 5.47E-11           |
| EP300              | transcription regulator         | 1.21E-10           |
| MBD3               | enzyme                          | 1.8E-10            |
| NFkB (complex)     | complex                         | 2.24E-10           |
| IL3                | cytokine                        | 2.84E-10           |
| STAT3              | transcription regulator         | 3.64E-10           |
| EPO                | cytokine                        | 4.79E-10           |
| YY1                | transcription regulator         | 7.37E-10           |
| PSEN1              | peptidase                       | 8.93E-10           |
| BDNF               | growth factor                   | 9.28E-10           |
| IL1B               | cytokine                        | 1.4E-09            |
| VEGFA              | growth factor                   | 1.53E-09           |
| NOTCH1             | transcription regulator         | 1.54E-09           |
| FOXO3              | transcription regulator         | 1.72E-09           |
| IFNG               | cytokine                        | 2.24E-09           |
| NGF                | growth factor                   | 2.26E-09           |
| CNR1               | g-protein coupled receptor      | 2.48E-09           |
| LDL                | complex                         | 4.21E-09           |
| MAPT               | other                           | 4.38E-09           |
| Pkc(s)             | group                           | 4.73E-09           |
| Ins1               | other                           | 5.22E-09           |
| CD3                | complex                         | 7.05E-09           |
| MTOR               | kinase                          | 8.37E-09           |
| PITX2              | transcription regulator         | 9.49E-09           |
| EGFR               | kinase                          | 9.69E-09           |
| DKK1               | growth factor                   | 9.91E-09           |
| MYOD1              | transcription regulator         | 1.04E-08           |
| ID3                | transcription regulator         | 1.12E-08           |
| Mek                | group                           | 1.13E-08           |
| NFKBIA             | transcription regulator         | 1.32E-08           |
| EGR2               | transcription regulator         | 1.35E-08           |
| IL2                | cytokine                        | 2.13E-08           |
| CYR61              | other                           | 0.000000026        |
| FSH                | complex                         | 2.78E-08           |
| COMMD3-BMI1        | transcription regulator         | 2.99E-08           |
| NR3C1              | ligand-dependent nuclear recept | 3.09E-08           |
| EZH2               | transcription regulator         | 3.29E-08           |
| NFE2L2             | transcription regulator         | 3.45E-08           |
| estrogen receptor  | group                           | 3.53E-08           |
| HSPA5              | enzyme                          | 3.87E-08           |
| HDAC1              | transcription regulator         | 0.00000004         |
| SMARCA4            | transcription regulator         | 4.36E-08           |
| RUNX1              | transcription regulator         | 6.29E-08           |
| CDK2AP1            | other                           | 6.61E-08           |
| SMAD4              | transcription regulator         | 7.64E-08           |



|                   |                                 |             |
|-------------------|---------------------------------|-------------|
| STAT5A            | transcription regulator         | 7.66E-08    |
| EPHB4             | kinase                          | 8.56E-08    |
| MGEA5             | enzyme                          | 9.92E-08    |
| mir-9             | microrna                        | 0.0000001   |
| IL6               | cytokine                        | 0.000000101 |
| Vegf              | group                           | 0.000000109 |
| GLI1              | transcription regulator         | 0.000000127 |
| PTEN              | phosphatase                     | 0.000000138 |
| KLF4              | transcription regulator         | 0.000000157 |
| HNF4A             | transcription regulator         | 0.000000186 |
| SMO               | g-protein coupled receptor      | 0.000000234 |
| MAPK9             | kinase                          | 0.000000258 |
| RBPJ              | transcription regulator         | 0.000000296 |
| ERK1/2            | group                           | 0.000000322 |
| VHL               | transcription regulator         | 0.000000386 |
| TNFSF11           | cytokine                        | 0.000000412 |
| TWIST1            | transcription regulator         | 0.000000446 |
| Growth hormone    | group                           | 0.000000459 |
| BMP4              | growth factor                   | 0.000000514 |
| ERBB4             | kinase                          | 0.000000529 |
| ETS1              | transcription regulator         | 0.000000534 |
| TCR               | complex                         | 0.000000599 |
| CREBBP            | transcription regulator         | 0.000000628 |
| Nr1h              | group                           | 0.000000659 |
| POU5F1            | transcription regulator         | 0.000000702 |
| Hedgehog          | group                           | 0.000000724 |
| ADORA2A           | g-protein coupled receptor      | 0.000000759 |
| HDAC2             | transcription regulator         | 0.000000759 |
| CEBPA             | transcription regulator         | 0.000000858 |
| IKZF1             | transcription regulator         | 0.000000894 |
| Akt               | group                           | 0.000000988 |
| BMP2              | growth factor                   | 0.00000104  |
| TGFB2             | growth factor                   | 0.00000104  |
| PPARG             | ligand-dependent nuclear recept | 0.00000109  |
| AR                | ligand-dependent nuclear recept | 0.00000117  |
| EBF1              | transcription regulator         | 0.00000123  |
| IL15              | cytokine                        | 0.00000128  |
| Laminin           | complex                         | 0.00000148  |
| MED1              | transcription regulator         | 0.00000163  |
| KDM5B             | transcription regulator         | 0.00000169  |
| PRKAG3            | other                           | 0.00000173  |
| IL4               | cytokine                        | 0.00000201  |
| PI3K (complex)    | complex                         | 0.00000201  |
| PTH               | other                           | 0.00000217  |
| ATF4              | transcription regulator         | 0.0000025   |
| INSR              | kinase                          | 0.00000257  |
| PI3K (family)     | group                           | 0.00000264  |
| FGF1              | growth factor                   | 0.00000289  |
| TGFBR2            | kinase                          | 0.0000029   |
| TGFB3             | growth factor                   | 0.00000316  |
| HOXA10            | transcription regulator         | 0.00000333  |
| ID2               | transcription regulator         | 0.00000335  |
| ESR2              | ligand-dependent nuclear recept | 0.00000339  |
| POU4F2            | transcription regulator         | 0.00000342  |
| OSM               | cytokine                        | 0.00000348  |
| Lh                | complex                         | 0.0000038   |
| EPAS1             | transcription regulator         | 0.00000407  |
| PAX3              | transcription regulator         | 0.00000407  |
| ANXA7             | ion channel                     | 0.00000415  |
| RNA polymerase II | complex                         | 0.00000437  |
| TAF4              | transcription regulator         | 0.00000472  |
| DICER1            | enzyme                          | 0.00000472  |
| INS               | other                           | 0.00000476  |
| Histone h4        | group                           | 0.00000489  |
| P38 MAPK          | group                           | 0.00000511  |
| FOXO4             | transcription regulator         | 0.00000518  |
| BRD2              | kinase                          | 0.00000524  |
| LTBP4             | growth factor                   | 0.00000564  |
| MAPK8             | kinase                          | 0.00000565  |

|                                             |                                 |            |
|---------------------------------------------|---------------------------------|------------|
| Insulin                                     | group                           | 0.00000619 |
| PRKCD                                       | kinase                          | 0.00000631 |
| TCF4                                        | transcription regulator         | 0.00000644 |
| PIK3R1                                      | kinase                          | 0.00000678 |
| Creb                                        | group                           | 0.00000687 |
| NRG2                                        | growth factor                   | 0.00000736 |
| TEAD4                                       | transcription regulator         | 0.00000792 |
| TP63                                        | transcription regulator         | 0.00000815 |
| AKT1                                        | kinase                          | 0.00000828 |
| PRL                                         | cytokine                        | 0.00000882 |
| EGR1                                        | transcription regulator         | 0.00000907 |
| MKNK1                                       | kinase                          | 0.00000932 |
| Smad                                        | complex                         | 0.00000939 |
| SPRY2                                       | other                           | 0.00000939 |
| APOE                                        | transporter                     | 0.00000947 |
| 26s Proteasome                              | complex                         | 0.0000095  |
| CDKN2A                                      | transcription regulator         | 0.00000977 |
| PRKAA2                                      | kinase                          | 0.0000103  |
| miR-17-5p (and other miRNAs w/seed AAAGUGC) | mature microRNA                 | 0.0000104  |
| RNF2                                        | transcription regulator         | 0.0000104  |
| E2F1                                        | transcription regulator         | 0.0000128  |
| Tgf beta                                    | group                           | 0.0000128  |
| WNT1                                        | cytokine                        | 0.0000135  |
| HSPA9                                       | other                           | 0.0000136  |
| PHF1                                        | transcription regulator         | 0.0000142  |
| MAPK14                                      | kinase                          | 0.0000169  |
| CD28                                        | transmembrane receptor          | 0.0000171  |
| FGF7                                        | growth factor                   | 0.0000174  |
| F2                                          | peptidase                       | 0.000018   |
| MYCN                                        | transcription regulator         | 0.0000182  |
| CDK7                                        | kinase                          | 0.0000203  |
| STAT5a/b                                    | group                           | 0.0000204  |
| AHR                                         | ligand-dependent nuclear recept | 0.0000205  |
| PRKCA                                       | kinase                          | 0.0000209  |
| TCF3                                        | transcription regulator         | 0.000022   |
| CSF1                                        | cytokine                        | 0.0000221  |
| EIF2AK3                                     | kinase                          | 0.0000226  |
| TCF7L2                                      | transcription regulator         | 0.0000227  |
| SIN3A                                       | transcription regulator         | 0.0000232  |
| SMAD3                                       | transcription regulator         | 0.0000244  |
| IRS1                                        | enzyme                          | 0.0000266  |
| BMP7                                        | growth factor                   | 0.0000266  |
| SIRT1                                       | transcription regulator         | 0.000028   |
| ITGA6                                       | transmembrane receptor          | 0.0000302  |
| GFI1B                                       | transcription regulator         | 0.0000302  |
| SOX2-OCT4-NANOG                             | complex                         | 0.0000327  |
| Jnk                                         | group                           | 0.000033   |
| SREBF1                                      | transcription regulator         | 0.000033   |
| SOD1                                        | enzyme                          | 0.000033   |
| PAX6                                        | transcription regulator         | 0.0000342  |
| GATA1                                       | transcription regulator         | 0.000036   |
| USF2                                        | transcription regulator         | 0.0000361  |
| CBX2                                        | transcription regulator         | 0.0000379  |
| SREBF2                                      | transcription regulator         | 0.0000382  |
| POU4F1                                      | transcription regulator         | 0.0000382  |
| CDKN1A                                      | kinase                          | 0.0000389  |
| CXCL12                                      | cytokine                        | 0.0000389  |
| KITLG                                       | growth factor                   | 0.0000396  |
| ATN1                                        | transcription regulator         | 0.0000402  |
| MITF                                        | transcription regulator         | 0.0000441  |
| PGR                                         | ligand-dependent nuclear recept | 0.0000479  |
| WWOX                                        | enzyme                          | 0.0000486  |
| BMP                                         | group                           | 0.0000487  |
| Hdac                                        | group                           | 0.0000495  |
| miR-16-5p (and other miRNAs w/seed AGCAGCA) | mature microRNA                 | 0.0000496  |
| FGF8                                        | growth factor                   | 0.0000498  |
| STAT4                                       | transcription regulator         | 0.0000519  |
| GLI2                                        | transcription regulator         | 0.0000539  |
| XBP1                                        | transcription regulator         | 0.0000548  |

|                                               |                                 |           |
|-----------------------------------------------|---------------------------------|-----------|
| SPDEF                                         | transcription regulator         | 0.000056  |
| TLR4                                          | transmembrane receptor          | 0.0000583 |
| EIF4E                                         | translation regulator           | 0.0000588 |
| GATA4                                         | transcription regulator         | 0.00006   |
| SNCA                                          | enzyme                          | 0.00006   |
| GNA15                                         | enzyme                          | 0.0000628 |
| SP1                                           | transcription regulator         | 0.0000629 |
| CSF3                                          | cytokine                        | 0.0000638 |
| mir-24                                        | microRNA                        | 0.000064  |
| PCGF2                                         | transcription regulator         | 0.000064  |
| STUB1                                         | enzyme                          | 0.000064  |
| BNIP3L                                        | other                           | 0.0000643 |
| NR3C2                                         | ligand-dependent nuclear recept | 0.0000657 |
| THRB                                          | ligand-dependent nuclear recept | 0.0000667 |
| EDN1                                          | cytokine                        | 0.0000718 |
| NFATC2                                        | transcription regulator         | 0.0000729 |
| HGF                                           | growth factor                   | 0.0000748 |
| Ras homolog                                   | group                           | 0.0000754 |
| CYB5R4                                        | enzyme                          | 0.0000754 |
| ELOVL5                                        | enzyme                          | 0.0000754 |
| TBX1                                          | transcription regulator         | 0.0000756 |
| USF1                                          | transcription regulator         | 0.0000784 |
| HES1                                          | transcription regulator         | 0.0000796 |
| FOXO1                                         | transcription regulator         | 0.0000807 |
| CITED2                                        | transcription regulator         | 0.0000823 |
| INHBA                                         | growth factor                   | 0.0000825 |
| CUL4B                                         | other                           | 0.0000847 |
| REST                                          | transcription regulator         | 0.0000882 |
| REL                                           | transcription regulator         | 0.0000905 |
| SOX3                                          | transcription regulator         | 0.0000931 |
| FOXA2                                         | transcription regulator         | 0.0000942 |
| Immunoglobulin                                | complex                         | 0.0000988 |
| ADAM10                                        | peptidase                       | 0.000102  |
| Sos                                           | group                           | 0.000106  |
| PRDM5                                         | transcription regulator         | 0.00011   |
| FOS                                           | transcription regulator         | 0.000111  |
| CTGF                                          | growth factor                   | 0.000113  |
| MECP2                                         | transcription regulator         | 0.000115  |
| ZNF217                                        | transcription regulator         | 0.000116  |
| ISL1                                          | transcription regulator         | 0.00012   |
| MAPK1                                         | kinase                          | 0.00012   |
| ERG                                           | transcription regulator         | 0.000126  |
| BCR (complex)                                 | complex                         | 0.000129  |
| SP3                                           | transcription regulator         | 0.000129  |
| mir-10                                        | microRNA                        | 0.00013   |
| MED12                                         | transcription regulator         | 0.000135  |
| SOX1                                          | transcription regulator         | 0.000138  |
| MYOC                                          | other                           | 0.000139  |
| ERBB3                                         | kinase                          | 0.000139  |
| miR-9-5p (and other miRNAs w/seed CUUUGGU)    | mature microRNA                 | 0.000141  |
| NKX3-1                                        | transcription regulator         | 0.000142  |
| TNC                                           | other                           | 0.000149  |
| HMGA1                                         | transcription regulator         | 0.000152  |
| CNTF                                          | cytokine                        | 0.000152  |
| GMNN                                          | transcription regulator         | 0.000152  |
| LYN                                           | kinase                          | 0.000152  |
| miR-124-3p (and other miRNAs w/seed AAGGCAC)  | mature microRNA                 | 0.000153  |
| COL18A1                                       | other                           | 0.000162  |
| MET                                           | kinase                          | 0.000162  |
| BMI1                                          | transcription regulator         | 0.000164  |
| FGF4                                          | growth factor                   | 0.000166  |
| mir-103                                       | microRNA                        | 0.000166  |
| ERK                                           | group                           | 0.000167  |
| NUMB                                          | other                           | 0.000174  |
| miR-199a-3p (and other miRNAs w/seed CAGUAGI) | mature microRNA                 | 0.000174  |
| BRCA1                                         | transcription regulator         | 0.000174  |
| RUNX3                                         | transcription regulator         | 0.000175  |
| ADCYAP1                                       | other                           | 0.000182  |
| Wnt                                           | group                           | 0.000184  |

|                                              |                                 |          |
|----------------------------------------------|---------------------------------|----------|
| SMAD1                                        | transcription regulator         | 0.000184 |
| TP73                                         | transcription regulator         | 0.000184 |
| IGF2                                         | growth factor                   | 0.000187 |
| BCL2                                         | transporter                     | 0.000195 |
| KAT6A                                        | enzyme                          | 0.000196 |
| IL3                                          | cytokine                        | 0.000205 |
| NR4A1                                        | ligand-dependent nuclear recept | 0.000213 |
| PIM1                                         | kinase                          | 0.000214 |
| FAS                                          | transmembrane receptor          | 0.000214 |
| SNAI1                                        | transcription regulator         | 0.000222 |
| Cg                                           | complex                         | 0.000236 |
| EED                                          | transcription regulator         | 0.000237 |
| NCOR1                                        | transcription regulator         | 0.000242 |
| FBXO32                                       | enzyme                          | 0.000242 |
| PRNP                                         | other                           | 0.000244 |
| SLC4A1                                       | transporter                     | 0.000245 |
| BMP6                                         | growth factor                   | 0.000251 |
| LEP                                          | growth factor                   | 0.000254 |
| JUN                                          | transcription regulator         | 0.000254 |
| CCND1                                        | transcription regulator         | 0.000254 |
| CYP1A1                                       | enzyme                          | 0.000254 |
| LRP1                                         | transmembrane receptor          | 0.000255 |
| miR-141-3p (and other miRNAs w/seed AACACUG) | mature microRNA                 | 0.00026  |
| SEL1L                                        | other                           | 0.000265 |
| KIF3A                                        | enzyme                          | 0.000285 |
| Mup1 (includes others)                       | other                           | 0.000285 |
| TAF6                                         | transcription regulator         | 0.000285 |
| miR-199a-5p (and other miRNAs w/seed CCAGUG) | mature microRNA                 | 0.000288 |
| mir-1                                        | microRNA                        | 0.000288 |
| Mapk                                         | group                           | 0.000291 |
| GLI3                                         | transcription regulator         | 0.000294 |
| RETN                                         | other                           | 0.000294 |
| NFYB                                         | transcription regulator         | 0.000296 |
| IFNB1                                        | cytokine                        | 0.000296 |
| STAT6                                        | transcription regulator         | 0.000297 |
| COL4A3                                       | other                           | 0.000331 |
| NTRK1                                        | kinase                          | 0.000331 |
| E2F4                                         | transcription regulator         | 0.000335 |
| IL5                                          | cytokine                        | 0.000357 |
| NANOG                                        | transcription regulator         | 0.000358 |
| LMNA                                         | other                           | 0.000364 |
| SYVN1                                        | transporter                     | 0.000365 |
| mir-133                                      | microRNA                        | 0.000368 |
| MAX                                          | transcription regulator         | 0.000374 |
| ITGB1                                        | transmembrane receptor          | 0.000374 |
| Pdgf (complex)                               | complex                         | 0.000379 |
| IKBKB                                        | kinase                          | 0.000383 |
| mir-27                                       | microRNA                        | 0.000383 |
| NOG                                          | growth factor                   | 0.000383 |
| CCNH                                         | transcription regulator         | 0.000392 |
| MNT                                          | transcription regulator         | 0.000392 |
| SPHK2                                        | kinase                          | 0.0004   |
| TERT                                         | enzyme                          | 0.000406 |
| ANGPT2                                       | growth factor                   | 0.000414 |
| ABL1                                         | kinase                          | 0.000419 |
| KLF6                                         | transcription regulator         | 0.000429 |
| RARB                                         | ligand-dependent nuclear recept | 0.000431 |
| NFKB1                                        | transcription regulator         | 0.000439 |
| THRA                                         | ligand-dependent nuclear recept | 0.000451 |
| CD40LG                                       | cytokine                        | 0.000452 |
| GRP                                          | growth factor                   | 0.000454 |
| PCYT1A                                       | enzyme                          | 0.000454 |
| KDM2B                                        | enzyme                          | 0.000454 |
| NFATC4                                       | transcription regulator         | 0.000454 |
| ALB                                          | transporter                     | 0.000456 |
| TNFSF13B                                     | cytokine                        | 0.000465 |
| LMNB1                                        | other                           | 0.000465 |
| CD40                                         | transmembrane receptor          | 0.000482 |
| CFC1/CFC1B                                   | other                           | 0.000482 |

|                                              |                            |          |
|----------------------------------------------|----------------------------|----------|
| STIL                                         | other                      | 0.000482 |
| YEATS4                                       | transcription regulator    | 0.000482 |
| UCHL1                                        | peptidase                  | 0.000482 |
| miR-2682-5p (and other miRNAs w/seed AGGCAG) | mature microRNA            | 0.000482 |
| PYCR2                                        | enzyme                     | 0.000482 |
| TOP2B                                        | enzyme                     | 0.000482 |
| CTH                                          | enzyme                     | 0.000482 |
| BUB3                                         | other                      | 0.000482 |
| MXD3                                         | transcription regulator    | 0.000482 |
| N-cor                                        | group                      | 0.000494 |
| PLSCR1                                       | enzyme                     | 0.000498 |
| OBP2B                                        | transporter                | 0.000498 |
| Collagen type I                              | complex                    | 0.000506 |
| CLOCK                                        | transcription regulator    | 0.000519 |
| MAP4K4                                       | kinase                     | 0.000529 |
| CDKN1B                                       | kinase                     | 0.000529 |
| miR-27a-3p (and other miRNAs w/seed UCACAGU) | mature microRNA            | 0.000529 |
| AGTR1                                        | g-protein coupled receptor | 0.000529 |
| Shc                                          | group                      | 0.000532 |
| PPM1D                                        | phosphatase                | 0.000532 |
| RYBP                                         | transcription regulator    | 0.000532 |
| Igkv1-117                                    | other                      | 0.000532 |
| VCAN                                         | other                      | 0.000535 |
| ADIPOQ                                       | other                      | 0.000557 |
| CDC73                                        | other                      | 0.000562 |
| ERVW-1                                       | other                      | 0.000562 |
| ZNF202                                       | transcription regulator    | 0.000562 |
| mir-19                                       | microRNA                   | 0.000562 |
| AMPK                                         | complex                    | 0.000594 |
| HMOX1                                        | enzyme                     | 0.000618 |
| Fgfr                                         | group                      | 0.000622 |
| 48s                                          | complex                    | 0.000622 |
| mir-214                                      | microRNA                   | 0.000622 |
| NF2                                          | other                      | 0.000622 |
| BDKRB2                                       | g-protein coupled receptor | 0.000622 |
| PLAGL1                                       | transcription regulator    | 0.000622 |
| TBX2                                         | transcription regulator    | 0.000628 |
| let-7a-5p (and other miRNAs w/seed GAGGUAG)  | mature microRNA            | 0.000633 |
| CSF2                                         | cytokine                   | 0.000656 |
| ANGPT1                                       | growth factor              | 0.000662 |
| CDK9                                         | kinase                     | 0.000675 |
| mir-15                                       | microRNA                   | 0.000675 |
| Rock                                         | group                      | 0.000686 |
| PAX1                                         | transcription regulator    | 0.000686 |
| SRF                                          | transcription regulator    | 0.00071  |
| PRMT5                                        | enzyme                     | 0.000753 |
| mir-30                                       | microRNA                   | 0.000753 |
| SLC16A2                                      | transporter                | 0.000753 |
| miR-30c-5p (and other miRNAs w/seed GUAAACA) | mature microRNA            | 0.000782 |
| FGFR2                                        | kinase                     | 0.000783 |
| IKBK                                         | kinase                     | 0.000783 |
| MECOM                                        | transcription regulator    | 0.000786 |
| PCDH11Y                                      | other                      | 0.000786 |
| mir-22                                       | microRNA                   | 0.000809 |
| miR-26a-5p (and other miRNAs w/seed UCAAGUA) | mature microRNA            | 0.000809 |
| CTSB                                         | peptidase                  | 0.000809 |
| RB1                                          | transcription regulator    | 0.000811 |
| TREM1                                        | transmembrane receptor     | 0.000819 |
| CD44                                         | enzyme                     | 0.000819 |
| HNRNPA2B1                                    | other                      | 0.000833 |
| KMT2A                                        | transcription regulator    | 0.000844 |
| SOX9                                         | transcription regulator    | 0.000891 |
| DNA-methyltransferase                        | group                      | 0.000913 |
| SGPL1                                        | enzyme                     | 0.000913 |
| Collagen Alpha1                              | group                      | 0.000913 |
| XRCC5                                        | enzyme                     | 0.000913 |
| LNK2                                         | other                      | 0.000913 |
| PARP1                                        | enzyme                     | 0.000915 |
| INSIG1                                       | other                      | 0.000915 |

|                                            |                                 |          |
|--------------------------------------------|---------------------------------|----------|
| IRF4                                       | transcription regulator         | 0.000918 |
| Alpha catenin                              | group                           | 0.000928 |
| CHD7                                       | enzyme                          | 0.00093  |
| MXI1                                       | transcription regulator         | 0.00093  |
| PDGFRA                                     | kinase                          | 0.00093  |
| ZBED6                                      | other                           | 0.000954 |
| EGLN1                                      | enzyme                          | 0.00096  |
| SERPINF1                                   | other                           | 0.00096  |
| TCF12                                      | transcription regulator         | 0.00096  |
| TRAF3                                      | enzyme                          | 0.000963 |
| GAST                                       | other                           | 0.000963 |
| T3-TR-RXR                                  | complex                         | 0.00101  |
| KDR                                        | kinase                          | 0.00101  |
| KAT2B                                      | transcription regulator         | 0.00101  |
| STK11                                      | kinase                          | 0.00101  |
| IGF1R                                      | transmembrane receptor          | 0.00103  |
| mir-29                                     | microrna                        | 0.00104  |
| Ubiquitin                                  | group                           | 0.00106  |
| mir-25                                     | microrna                        | 0.00106  |
| JAG1                                       | growth factor                   | 0.00106  |
| TFAP2A                                     | transcription regulator         | 0.00107  |
| GF11                                       | transcription regulator         | 0.00107  |
| NOV                                        | growth factor                   | 0.00108  |
| PKD2                                       | ion channel                     | 0.00109  |
| DVL1                                       | other                           | 0.00109  |
| LRP2                                       | transporter                     | 0.00109  |
| USP8                                       | peptidase                       | 0.00109  |
| CUL1                                       | enzyme                          | 0.00109  |
| PPM1A                                      | phosphatase                     | 0.00109  |
| DMTF1                                      | transcription regulator         | 0.00109  |
| GATA3                                      | transcription regulator         | 0.0011   |
| CD38                                       | enzyme                          | 0.00112  |
| TFDP1                                      | transcription regulator         | 0.0012   |
| FLT3                                       | kinase                          | 0.0012   |
| S100A8                                     | other                           | 0.0012   |
| ELAVL1                                     | other                           | 0.00121  |
| THPO                                       | cytokine                        | 0.00121  |
| FMR1                                       | translation regulator           | 0.00121  |
| BCL6                                       | transcription regulator         | 0.00122  |
| miR-1-3p (and other miRNAs w/seed GGAAUGU) | mature microrna                 | 0.00125  |
| PRKCE                                      | kinase                          | 0.00126  |
| RAF1                                       | kinase                          | 0.00128  |
| KLF2                                       | transcription regulator         | 0.00134  |
| MAP2K4                                     | kinase                          | 0.00134  |
| AGPAT2                                     | enzyme                          | 0.00134  |
| FKBP4                                      | enzyme                          | 0.00134  |
| caspase                                    | group                           | 0.00136  |
| HOXB13                                     | transcription regulator         | 0.00136  |
| PBX1                                       | transcription regulator         | 0.00136  |
| NUPR1                                      | transcription regulator         | 0.00137  |
| RARA                                       | ligand-dependent nuclear recept | 0.00137  |
| BRD4                                       | kinase                          | 0.00141  |
| Ras                                        | group                           | 0.00141  |
| CDX2                                       | transcription regulator         | 0.00141  |
| OTX2                                       | transcription regulator         | 0.00141  |
| ITK                                        | kinase                          | 0.00144  |
| LTBP1                                      | other                           | 0.00144  |
| GNL3                                       | other                           | 0.00144  |
| IL10                                       | cytokine                        | 0.00145  |
| AURKA                                      | kinase                          | 0.00146  |
| CHRM1                                      | g-protein coupled receptor      | 0.00146  |
| PTBP1                                      | enzyme                          | 0.00146  |
| JUP                                        | other                           | 0.00146  |
| PDE3B                                      | enzyme                          | 0.00146  |
| DBI                                        | other                           | 0.00146  |
| MMP2                                       | peptidase                       | 0.00148  |
| mir-145                                    | microrna                        | 0.0015   |
| MTA1                                       | transcription regulator         | 0.0015   |
| CHUK                                       | kinase                          | 0.00153  |

|                                             |                                 |         |
|---------------------------------------------|---------------------------------|---------|
| WNT5A                                       | cytokine                        | 0.00161 |
| SOCS3                                       | phosphatase                     | 0.00164 |
| GDNF                                        | growth factor                   | 0.00164 |
| miR-133a-3p (and other miRNAs w/seed UUGGUC | mature microRNA                 | 0.00171 |
| MIR124                                      | group                           | 0.00173 |
| FGFR3                                       | kinase                          | 0.00173 |
| CCNK                                        | kinase                          | 0.00173 |
| SKIL                                        | transcription regulator         | 0.0018  |
| Meg3                                        | other                           | 0.00182 |
| SUFU                                        | transcription regulator         | 0.00182 |
| GRPR                                        | G-protein coupled receptor      | 0.00182 |
| miR-125b-2-3p (miRNAs w/seed CAAGUCA)       | mature microRNA                 | 0.00182 |
| GGA3                                        | transporter                     | 0.00182 |
| RAPSN                                       | other                           | 0.00182 |
| ATP2A1                                      | transporter                     | 0.00182 |
| CHD4                                        | enzyme                          | 0.00183 |
| CBX5                                        | transcription regulator         | 0.00186 |
| LYL1                                        | transcription regulator         | 0.00188 |
| S100B                                       | other                           | 0.00188 |
| mir-144                                     | microRNA                        | 0.00188 |
| JARID2                                      | transcription regulator         | 0.00188 |
| SLC6A3                                      | transporter                     | 0.00188 |
| NONO                                        | other                           | 0.00188 |
| BAG1                                        | other                           | 0.0019  |
| RRP1B                                       | other                           | 0.00191 |
| CST5                                        | other                           | 0.00193 |
| miR-34a-5p (and other miRNAs w/seed GGCAGUG | mature microRNA                 | 0.00201 |
| PNPLA8                                      | enzyme                          | 0.00204 |
| ACACA                                       | enzyme                          | 0.00204 |
| SH3KBP1                                     | other                           | 0.00204 |
| ACLY                                        | enzyme                          | 0.00204 |
| SMARCA1                                     | transcription regulator         | 0.00204 |
| HBP1                                        | transcription regulator         | 0.00204 |
| EMX2                                        | transcription regulator         | 0.00204 |
| SERPINE2                                    | other                           | 0.00204 |
| FBXO2                                       | enzyme                          | 0.00204 |
| DHH                                         | peptidase                       | 0.00204 |
| RORA                                        | ligand-dependent nuclear recept | 0.00206 |
| TSH                                         | complex                         | 0.00213 |
| MMP9                                        | peptidase                       | 0.00213 |
| TFAP2C                                      | transcription regulator         | 0.00213 |
| DGCR8                                       | enzyme                          | 0.00216 |
| APOA1                                       | transporter                     | 0.00216 |
| MYOG                                        | transcription regulator         | 0.00217 |
| KNG1                                        | other                           | 0.00217 |
| Gli                                         | group                           | 0.00223 |
| KLF10                                       | transcription regulator         | 0.00223 |
| ID4                                         | transcription regulator         | 0.00223 |
| FOXA1                                       | transcription regulator         | 0.0023  |
| UCP1                                        | transporter                     | 0.00231 |
| FGF10                                       | growth factor                   | 0.00236 |
| RXRA                                        | ligand-dependent nuclear recept | 0.00244 |
| NCOR-LXR-Oxysterol-RXR-9 cis RA             | complex                         | 0.00246 |
| miR-24-3p (and other miRNAs w/seed GGCUCAG) | mature microRNA                 | 0.00246 |
| E2F6                                        | transcription regulator         | 0.00246 |
| KIT                                         | transmembrane receptor          | 0.00253 |
| A2M                                         | transporter                     | 0.00257 |
| MAPK8IP1                                    | other                           | 0.00257 |
| DAG1                                        | transmembrane receptor          | 0.00257 |
| RAE1                                        | other                           | 0.00257 |
| NAB2                                        | transcription regulator         | 0.00257 |
| S100A9                                      | other                           | 0.00262 |
| SMARCB1                                     | transcription regulator         | 0.00262 |
| GDF2                                        | growth factor                   | 0.00266 |
| Hsp27                                       | group                           | 0.0027  |
| ATP7B                                       | transporter                     | 0.0027  |
| ACVR1                                       | kinase                          | 0.0027  |
| HDAC5                                       | transcription regulator         | 0.00276 |
| POLR2A                                      | enzyme                          | 0.00276 |

|                                              |                            |         |
|----------------------------------------------|----------------------------|---------|
| FANCC                                        | other                      | 0.00276 |
| FOXP3                                        | transcription regulator    | 0.00282 |
| MEF2C                                        | transcription regulator    | 0.00282 |
| miR-29b-3p (and other miRNAs w/seed AGCACCA) | mature microRNA            | 0.00284 |
| IgG                                          | complex                    | 0.00284 |
| LEPR                                         | transmembrane receptor     | 0.00284 |
| ADRB                                         | group                      | 0.00302 |
| HOXA3                                        | transcription regulator    | 0.00304 |
| IRF8                                         | transcription regulator    | 0.00304 |
| mir-21                                       | microRNA                   | 0.0031  |
| LIF                                          | cytokine                   | 0.0032  |
| mir-17                                       | microRNA                   | 0.00321 |
| YBX1                                         | transcription regulator    | 0.00321 |
| AGER                                         | transmembrane receptor     | 0.00323 |
| TGFBR1                                       | kinase                     | 0.00323 |
| STOX1                                        | other                      | 0.00324 |
| APBB1                                        | transcription regulator    | 0.00324 |
| LAMC1                                        | other                      | 0.00324 |
| EP400                                        | other                      | 0.00325 |
| SPHK1                                        | kinase                     | 0.00325 |
| RUVBL1                                       | transcription regulator    | 0.00325 |
| SPI1                                         | transcription regulator    | 0.00329 |
| MTTP                                         | transporter                | 0.00332 |
| LIPE                                         | enzyme                     | 0.00333 |
| LGALS3                                       | other                      | 0.00335 |
| EHF                                          | transcription regulator    | 0.00335 |
| SP100                                        | transcription regulator    | 0.00343 |
| HFE                                          | transmembrane receptor     | 0.00343 |
| RACK1                                        | enzyme                     | 0.00343 |
| AXIN1                                        | other                      | 0.00343 |
| EPOR                                         | transmembrane receptor     | 0.00343 |
| voltage-gated calcium channel                | complex                    | 0.00345 |
| HUWE1                                        | transcription regulator    | 0.00345 |
| IFT88                                        | other                      | 0.00345 |
| TIP60                                        | complex                    | 0.00345 |
| MIRLET7                                      | group                      | 0.00345 |
| mir-154                                      | microRNA                   | 0.00345 |
| CCND2                                        | other                      | 0.00345 |
| CBX8                                         | other                      | 0.00345 |
| DDB1                                         | other                      | 0.00345 |
| RECK                                         | other                      | 0.00345 |
| FOXC2                                        | transcription regulator    | 0.00357 |
| SUZ12                                        | enzyme                     | 0.00363 |
| E2f                                          | group                      | 0.00365 |
| NEUROG3                                      | transcription regulator    | 0.00366 |
| MAP2K7                                       | kinase                     | 0.00372 |
| CEBPB                                        | transcription regulator    | 0.00374 |
| SOX7                                         | transcription regulator    | 0.00387 |
| RCE1                                         | peptidase                  | 0.00387 |
| GHR                                          | transmembrane receptor     | 0.00387 |
| TGFA                                         | growth factor              | 0.00396 |
| USP7                                         | peptidase                  | 0.00396 |
| CSF1R                                        | kinase                     | 0.00396 |
| ECSIT                                        | transcription regulator    | 0.00396 |
| DRD2                                         | g-protein coupled receptor | 0.00396 |
| THBS4                                        | other                      | 0.00396 |
| ARNT                                         | transcription regulator    | 0.00401 |
| HBEGF                                        | growth factor              | 0.00405 |
| DIO2                                         | enzyme                     | 0.00405 |
| MEIS1                                        | transcription regulator    | 0.00405 |
| PPARGC1A                                     | transcription regulator    | 0.0041  |
| LDLR                                         | transporter                | 0.00417 |
| MAPK7                                        | kinase                     | 0.00418 |
| BRAF                                         | kinase                     | 0.00418 |
| EOMES                                        | transcription regulator    | 0.00426 |
| TPPP2                                        | other                      | 0.00427 |
| Cpla2                                        | group                      | 0.00427 |
| Stat1 dimer                                  | complex                    | 0.00427 |
| FA2H                                         | enzyme                     | 0.00427 |



|                                              |                         |         |
|----------------------------------------------|-------------------------|---------|
| RASSF6                                       | other                   | 0.00427 |
| CDK12                                        | kinase                  | 0.00427 |
| BCAS2                                        | other                   | 0.00427 |
| MTF2                                         | transcription regulator | 0.00427 |
| ZBTB46                                       | other                   | 0.00427 |
| TYMS                                         | enzyme                  | 0.00427 |
| RNF34                                        | enzyme                  | 0.00427 |
| miR-378a-3p (and other miRNAs w/seed CUGGACI | mature microrna         | 0.00427 |
| PPP1R13B                                     | phosphatase             | 0.00427 |
| RIPK4                                        | kinase                  | 0.00427 |
| WSB1                                         | enzyme                  | 0.00427 |
| ELAVL4                                       | other                   | 0.00427 |
| KCTD11                                       | other                   | 0.00427 |
| BRCA2                                        | transcription regulator | 0.00427 |
| NAA10                                        | enzyme                  | 0.00427 |
| HIVEP2                                       | transcription regulator | 0.00427 |
| GNL2                                         | enzyme                  | 0.00427 |
| Collagen type V                              | complex                 | 0.00427 |
| HDAC4                                        | transcription regulator | 0.0044  |
| JINK1/2                                      | group                   | 0.00448 |
| CaMKII                                       | complex                 | 0.00448 |
| JUN/JUNB/JUND                                | group                   | 0.00448 |
| ATG5                                         | other                   | 0.00448 |
| IGF2BP1                                      | translation regulator   | 0.00448 |
| TRPC1                                        | ion channel             | 0.00448 |
| SIN3B                                        | transcription regulator | 0.00448 |
| PKD1                                         | ion channel             | 0.0045  |
| SELENOS                                      | other                   | 0.00455 |
| DPH5                                         | enzyme                  | 0.00455 |
| ZBTB33                                       | other                   | 0.00455 |
| ZNF148                                       | transcription regulator | 0.00455 |
| SPTLC2                                       | enzyme                  | 0.00455 |
| PNN                                          | other                   | 0.00455 |
| MIR101                                       | group                   | 0.00455 |
| HOXC9                                        | transcription regulator | 0.00455 |
| DDR1                                         | kinase                  | 0.00455 |
| RND3                                         | enzyme                  | 0.00455 |
| DDX5                                         | enzyme                  | 0.00455 |
| NDN                                          | transcription regulator | 0.00455 |
| HOXC6                                        | transcription regulator | 0.00459 |
| MEF2D                                        | transcription regulator | 0.00459 |
| STAT1                                        | transcription regulator | 0.00461 |
| ASCL1                                        | transcription regulator | 0.00464 |
| TCF                                          | group                   | 0.00464 |
| Notch                                        | group                   | 0.00467 |
| CYP19A1                                      | enzyme                  | 0.00467 |
| PLG                                          | peptidase               | 0.00467 |
| MSX2                                         | transcription regulator | 0.00489 |
| SCD                                          | enzyme                  | 0.00492 |
| DDIT3                                        | transcription regulator | 0.00492 |
| mir-193                                      | microrna                | 0.00493 |
| MEP1B                                        | peptidase               | 0.00493 |
| PTCH1                                        | transmembrane receptor  | 0.00493 |
| MKL2                                         | transcription regulator | 0.00496 |
| SMAD2                                        | transcription regulator | 0.00496 |
| STAT5B                                       | transcription regulator | 0.00503 |
| FN1                                          | enzyme                  | 0.00518 |
| let-7                                        | microrna                | 0.00539 |
| TXK                                          | kinase                  | 0.00539 |
| IGF2R                                        | transmembrane receptor  | 0.00539 |
| ALK                                          | kinase                  | 0.00539 |
| RELN                                         | peptidase               | 0.00539 |
| JMJD1C                                       | enzyme                  | 0.00539 |
| ARNTL                                        | transcription regulator | 0.00541 |
| YAP1                                         | transcription regulator | 0.00553 |
| RHOA                                         | enzyme                  | 0.00553 |
| H2AFB3 (includes others)                     | other                   | 0.00563 |
| ELK1                                         | transcription regulator | 0.00563 |
| miR-21-5p (and other miRNAs w/seed AGCUUUAU) | mature microrna         | 0.00563 |

|                                              |                                 |         |
|----------------------------------------------|---------------------------------|---------|
| SMAD7                                        | transcription regulator         | 0.00567 |
| miR-125b-5p (and other miRNAs w/seed CCCUGA) | mature microrna                 | 0.00571 |
| RNF31                                        | enzyme                          | 0.00576 |
| SKI                                          | transcription regulator         | 0.00576 |
| FASN                                         | enzyme                          | 0.00576 |
| NR1I3                                        | ligand-dependent nuclear recept | 0.00579 |
| NCSTN                                        | peptidase                       | 0.00586 |
| IL6R                                         | transmembrane receptor          | 0.00589 |
| SPP1                                         | cytokine                        | 0.006   |
| CHADL                                        | other                           | 0.00607 |
| Rbp                                          | group                           | 0.00615 |
| NSA2                                         | other                           | 0.00615 |
| ZSCAN1                                       | other                           | 0.00615 |
| RTN3                                         | other                           | 0.00615 |
| ISL2                                         | transcription regulator         | 0.00615 |
| SEMA4A                                       | other                           | 0.00615 |
| EPN3                                         | other                           | 0.00615 |
| GSTK1                                        | enzyme                          | 0.00615 |
| NAT8                                         | transcription regulator         | 0.00615 |
| NCEH1                                        | enzyme                          | 0.00615 |
| VAX2                                         | transcription regulator         | 0.00615 |
| Gm-Csf Receptor                              | complex                         | 0.00615 |
| Importin alpha                               | group                           | 0.00615 |
| BACE1-AS                                     | other                           | 0.00615 |
| AP3D1                                        | transporter                     | 0.00615 |
| APBA1                                        | transporter                     | 0.00615 |
| PTPA                                         | phosphatase                     | 0.00615 |
| miR-188-3p (miRNAs w/seed UCCCACA)           | mature microrna                 | 0.00615 |
| mir-134                                      | microrna                        | 0.00615 |
| CENPX                                        | other                           | 0.00615 |
| RPS14                                        | translation regulator           | 0.00615 |
| PSG1                                         | other                           | 0.00615 |
| TOP3A                                        | enzyme                          | 0.00615 |
| MAGEA4                                       | other                           | 0.00615 |
| SYNJ2BP                                      | other                           | 0.00615 |
| TSPYL2                                       | other                           | 0.00615 |
| ITM2B                                        | other                           | 0.00615 |
| EHD3                                         | other                           | 0.00615 |
| CCT5                                         | other                           | 0.00615 |
| DST                                          | other                           | 0.00615 |
| WASHC1                                       | other                           | 0.00615 |
| ATP9A                                        | transporter                     | 0.00615 |
| MXD4                                         | transcription regulator         | 0.00615 |
| PTPRT                                        | phosphatase                     | 0.00615 |
| GAS1                                         | other                           | 0.00615 |
| NPAS3                                        | other                           | 0.00615 |
| MTHFR                                        | enzyme                          | 0.00615 |
| PCBP4                                        | other                           | 0.00615 |
| PDIA6                                        | enzyme                          | 0.00615 |
| DDX20                                        | transcription regulator         | 0.00615 |
| EVC                                          | other                           | 0.00615 |
| Usp17la (includes others)                    | peptidase                       | 0.00615 |
| NAT8B                                        | enzyme                          | 0.00615 |
| S100A11                                      | other                           | 0.00615 |
| DUOX2                                        | enzyme                          | 0.00615 |
| mir-203                                      | microrna                        | 0.0062  |
| ACACB                                        | enzyme                          | 0.0062  |
| OSBPL8                                       | transporter                     | 0.0062  |
| ITPR1                                        | ion channel                     | 0.0062  |
| POMC                                         | other                           | 0.00631 |
| ITGB2                                        | transmembrane receptor          | 0.00634 |
| ITGA5                                        | transmembrane receptor          | 0.00634 |
| mir-34                                       | microrna                        | 0.00634 |
| mir-181                                      | microrna                        | 0.00634 |
| BACH2                                        | transcription regulator         | 0.00634 |
| TSC2                                         | other                           | 0.00635 |
| Gm-csf                                       | group                           | 0.00649 |
| FSHR                                         | g-protein coupled receptor      | 0.00649 |
| INHA                                         | growth factor                   | 0.00699 |

|                                              |                            |         |
|----------------------------------------------|----------------------------|---------|
| CTR9                                         | other                      | 0.00729 |
| PTF1A                                        | transcription regulator    | 0.00729 |
| TCF7L1                                       | transcription regulator    | 0.00739 |
| UPF2                                         | other                      | 0.00739 |
| SOX10                                        | transcription regulator    | 0.00739 |
| PRKACA                                       | kinase                     | 0.00739 |
| ERN1                                         | kinase                     | 0.00744 |
| JAK2                                         | kinase                     | 0.00744 |
| PTGES                                        | enzyme                     | 0.00745 |
| EIF2AK2                                      | kinase                     | 0.00758 |
| Hsp90                                        | group                      | 0.00784 |
| NCOA3                                        | transcription regulator    | 0.00784 |
| PTHLH                                        | other                      | 0.00784 |
| MKL1                                         | transcription regulator    | 0.00786 |
| Adaptor protein 2                            | complex                    | 0.00795 |
| mir-148                                      | microrna                   | 0.00795 |
| miR-217-5p (and other miRNAs w/seed ACUGCAU) | mature microrna            | 0.00795 |
| mir-137                                      | microrna                   | 0.00795 |
| FOXD1                                        | transcription regulator    | 0.00795 |
| VEGFC                                        | growth factor              | 0.00795 |
| ITGA3                                        | other                      | 0.00795 |
| MZF1                                         | transcription regulator    | 0.00795 |
| GPR37                                        | g-protein coupled receptor | 0.00795 |
| BHLHE41                                      | transcription regulator    | 0.00795 |
| ACO1                                         | enzyme                     | 0.00795 |
| PADI4                                        | enzyme                     | 0.00805 |
| HOXD8                                        | transcription regulator    | 0.00805 |
| RASSF3                                       | other                      | 0.00805 |
| AQP11                                        | transporter                | 0.00805 |
| TCF21                                        | transcription regulator    | 0.00805 |
| BANP                                         | other                      | 0.00805 |
| RBBP4                                        | enzyme                     | 0.00805 |
| LRP8                                         | transmembrane receptor     | 0.00805 |
| KRT19                                        | other                      | 0.00805 |
| BCL2L12                                      | other                      | 0.00805 |
| miR-139-5p (miRNAs w/seed CUACAGU)           | mature microrna            | 0.00805 |
| ATP2B2                                       | transporter                | 0.00805 |
| SRSF3                                        | other                      | 0.00805 |
| SSPN                                         | other                      | 0.00805 |
| KSR1                                         | kinase                     | 0.00805 |
| PEBP4                                        | other                      | 0.00805 |
| SLIT2                                        | other                      | 0.00805 |
| USP11                                        | peptidase                  | 0.00805 |
| RPL11                                        | other                      | 0.00805 |
| DNAJA3                                       | other                      | 0.00805 |
| SIX3                                         | transcription regulator    | 0.00805 |
| PAX4                                         | transcription regulator    | 0.00805 |
| HOXD9                                        | transcription regulator    | 0.00805 |
| G6PC                                         | phosphatase                | 0.00805 |
| CDH13                                        | other                      | 0.00805 |
| SULT1E1                                      | enzyme                     | 0.00805 |
| YY1AP1                                       | other                      | 0.00805 |
| RBFOX2                                       | transcription regulator    | 0.00805 |
| MYOCD                                        | transcription regulator    | 0.00819 |
| LGR4                                         | transmembrane receptor     | 0.00822 |
| Endothelin                                   | group                      | 0.00822 |
| p85 (pik3r)                                  | group                      | 0.00822 |
| BMPER                                        | other                      | 0.00822 |
| ATP2A2                                       | transporter                | 0.00822 |
| ARG1                                         | enzyme                     | 0.00822 |
| NCAM1                                        | other                      | 0.00822 |
| FABP5                                        | transporter                | 0.00822 |
| CDK8                                         | kinase                     | 0.00822 |
| MYCBP2                                       | enzyme                     | 0.00822 |
| CARM1                                        | transcription regulator    | 0.00824 |
| DACH1                                        | transcription regulator    | 0.00824 |
| KIAA1524                                     | other                      | 0.00825 |
| GHRL                                         | growth factor              | 0.00825 |
| FGFR1                                        | kinase                     | 0.00838 |

|                                             |                                 |         |
|---------------------------------------------|---------------------------------|---------|
| SOD2                                        | enzyme                          | 0.00843 |
| mir-155                                     | microrna                        | 0.00843 |
| IL1A                                        | cytokine                        | 0.0086  |
| PML                                         | transcription regulator         | 0.00877 |
| TCOF1                                       | transporter                     | 0.00878 |
| ACOX1                                       | enzyme                          | 0.00885 |
| MAP2K1                                      | kinase                          | 0.00888 |
| APOB                                        | transporter                     | 0.00891 |
| WNT4                                        | cytokine                        | 0.00891 |
| VTN                                         | other                           | 0.00891 |
| Stat3-Stat3                                 | complex                         | 0.00908 |
| IHH                                         | enzyme                          | 0.00908 |
| CX3CL1                                      | cytokine                        | 0.00908 |
| SIX5                                        | transcription regulator         | 0.00908 |
| NRAS                                        | enzyme                          | 0.00924 |
| PPARA                                       | ligand-dependent nuclear recept | 0.0095  |
| TFAP4                                       | transcription regulator         | 0.00967 |
| FLI1                                        | transcription regulator         | 0.0097  |
| CYP1B1                                      | enzyme                          | 0.0097  |
| mir-182                                     | microrna                        | 0.00987 |
| AVP                                         | other                           | 0.00987 |
| EBI3                                        | cytokine                        | 0.00987 |
| APC                                         | enzyme                          | 0.01    |
| PDX1                                        | transcription regulator         | 0.0101  |
| CAV1                                        | transmembrane receptor          | 0.0103  |
| ETS2                                        | transcription regulator         | 0.0105  |
| MYD88                                       | other                           | 0.0105  |
| SFRP1                                       | transmembrane receptor          | 0.0106  |
| PRKCZ                                       | kinase                          | 0.0106  |
| F7                                          | peptidase                       | 0.0106  |
| ZBTB7B                                      | transcription regulator         | 0.0106  |
| TIMP1                                       | cytokine                        | 0.0106  |
| NRXN1                                       | transporter                     | 0.0106  |
| ZBTB17                                      | transcription regulator         | 0.0106  |
| TMSB4                                       | group                           | 0.0107  |
| RNF20                                       | enzyme                          | 0.0107  |
| hemoglobin                                  | complex                         | 0.0107  |
| COPS5                                       | transcription regulator         | 0.0107  |
| FMO3                                        | enzyme                          | 0.0107  |
| ADRB1                                       | g-protein coupled receptor      | 0.0107  |
| Rxr                                         | group                           | 0.0111  |
| IL27                                        | cytokine                        | 0.0111  |
| NFYA                                        | transcription regulator         | 0.0111  |
| MTPN                                        | transcription regulator         | 0.0111  |
| HEXIM1                                      | transcription regulator         | 0.0112  |
| SAMSN1                                      | other                           | 0.0112  |
| VGLL3                                       | other                           | 0.0112  |
| PLD1                                        | enzyme                          | 0.0112  |
| miR-375-3p (and other miRNAs w/seed UUGUUCG | mature microrna                 | 0.0112  |
| MAPK10                                      | kinase                          | 0.0112  |
| EDNRB                                       | g-protein coupled receptor      | 0.0112  |
| BET                                         | group                           | 0.0112  |
| TNFSF13                                     | cytokine                        | 0.0113  |
| SERPINA1                                    | other                           | 0.0113  |
| IRS2                                        | enzyme                          | 0.0113  |
| NRF1                                        | transcription regulator         | 0.0113  |
| PIK3CA                                      | kinase                          | 0.0113  |
| FOXM1                                       | transcription regulator         | 0.0115  |
| FOXL2                                       | transcription regulator         | 0.0117  |
| SFTPA1                                      | transporter                     | 0.0121  |
| SLC13A1                                     | transporter                     | 0.0123  |
| CFTR                                        | ion channel                     | 0.0123  |
| PDGFB                                       | growth factor                   | 0.0124  |
| CXCR4                                       | g-protein coupled receptor      | 0.0124  |
| RET                                         | kinase                          | 0.0129  |
| KDM5A                                       | transcription regulator         | 0.0129  |
| IL17A                                       | cytokine                        | 0.013   |
| Raf                                         | group                           | 0.0131  |
| LONP1                                       | peptidase                       | 0.0131  |

|                                              |                                 |        |
|----------------------------------------------|---------------------------------|--------|
| ZNF100                                       | other                           | 0.0133 |
| ZNF85                                        | transcription regulator         | 0.0133 |
| ZNF652                                       | other                           | 0.0133 |
| ZNF254                                       | other                           | 0.0133 |
| RASSF8                                       | other                           | 0.0133 |
| ABCA7                                        | transporter                     | 0.0133 |
| ZNF431                                       | other                           | 0.0133 |
| ARID5A                                       | transcription regulator         | 0.0133 |
| DLG1                                         | kinase                          | 0.0133 |
| Collagen type III                            | complex                         | 0.0133 |
| BAG6                                         | enzyme                          | 0.0133 |
| HTR2A                                        | g-protein coupled receptor      | 0.0133 |
| AGR2                                         | other                           | 0.0133 |
| CTNNBIP1                                     | other                           | 0.0133 |
| RAX                                          | transcription regulator         | 0.0133 |
| GNE                                          | kinase                          | 0.0133 |
| ENO1                                         | enzyme                          | 0.0133 |
| ZNF665                                       | other                           | 0.0133 |
| ZNF528                                       | other                           | 0.0133 |
| MCM7                                         | enzyme                          | 0.0133 |
| PROK1                                        | growth factor                   | 0.0133 |
| NACC1                                        | transcription regulator         | 0.0133 |
| ZNF43                                        | other                           | 0.0133 |
| ZNF429                                       | other                           | 0.0133 |
| AFF1                                         | transcription regulator         | 0.0133 |
| SH2B1                                        | other                           | 0.0133 |
| ZNF708                                       | other                           | 0.0133 |
| GNA12                                        | enzyme                          | 0.0134 |
| MPZ                                          | other                           | 0.0136 |
| PPP1R13L                                     | transcription regulator         | 0.0136 |
| ING1                                         | transcription regulator         | 0.0136 |
| LHX2                                         | transcription regulator         | 0.0136 |
| CD9                                          | other                           | 0.0136 |
| ARRB1                                        | other                           | 0.0136 |
| TAF4B                                        | transcription regulator         | 0.0136 |
| SMAD5                                        | transcription regulator         | 0.0136 |
| Tcf7                                         | transcription regulator         | 0.0136 |
| NR1H3                                        | ligand-dependent nuclear recept | 0.0144 |
| Ap1                                          | complex                         | 0.0145 |
| KDM1A                                        | enzyme                          | 0.0146 |
| TBP                                          | transcription regulator         | 0.0146 |
| PELP1                                        | other                           | 0.0147 |
| miR-146a-5p (and other miRNAs w/seed GAGAAC) | mature microRNA                 | 0.0149 |
| DMP1                                         | other                           | 0.0151 |
| GSX2                                         | transcription regulator         | 0.0152 |
| mir-26                                       | microRNA                        | 0.0152 |
| mir-218                                      | microRNA                        | 0.0152 |
| ELK4                                         | transcription regulator         | 0.0152 |
| FABP2                                        | transporter                     | 0.0152 |
| TIMP3                                        | other                           | 0.0152 |
| LEF1                                         | transcription regulator         | 0.0157 |
| ATF6                                         | transcription regulator         | 0.0157 |
| CTCF                                         | transcription regulator         | 0.0162 |
| ITGB3                                        | transmembrane receptor          | 0.0162 |
| GH1                                          | growth factor                   | 0.0163 |
| ACTL6A                                       | other                           | 0.0163 |
| NOX4                                         | enzyme                          | 0.0163 |
| DMRT1                                        | transcription regulator         | 0.0164 |
| PTGER4                                       | g-protein coupled receptor      | 0.0164 |
| RORC                                         | ligand-dependent nuclear recept | 0.0166 |
| ZBTB20                                       | transcription regulator         | 0.0166 |
| HOXA9                                        | transcription regulator         | 0.0168 |
| JUNB                                         | transcription regulator         | 0.0169 |
| ZMPSTE24                                     | peptidase                       | 0.0169 |
| miR-31-5p (and other miRNAs w/seed GGCAAGA)  | mature microRNA                 | 0.0169 |
| miR-23a-3p (and other miRNAs w/seed UCACAUU) | mature microRNA                 | 0.0169 |
| MLX                                          | transcription regulator         | 0.0169 |
| SMARCD3                                      | transcription regulator         | 0.0169 |
| MAP2K2                                       | kinase                          | 0.0169 |

|                                             |                                 |        |
|---------------------------------------------|---------------------------------|--------|
| IDO1                                        | enzyme                          | 0.0169 |
| HOXA5                                       | transcription regulator         | 0.0169 |
| DUSP5                                       | phosphatase                     | 0.0169 |
| CYP2J2                                      | enzyme                          | 0.0169 |
| NR6A1                                       | ligand-dependent nuclear recept | 0.0169 |
| GNAS                                        | enzyme                          | 0.0173 |
| NME1                                        | kinase                          | 0.0173 |
| IDH1                                        | enzyme                          | 0.0173 |
| PTCHD4                                      | other                           | 0.0175 |
| Smad1/5/8                                   | group                           | 0.0175 |
| Beta Secretase                              | group                           | 0.0175 |
| TFIIH                                       | complex                         | 0.0175 |
| ZNF219                                      | transcription regulator         | 0.0175 |
| CADPS                                       | other                           | 0.0175 |
| PRMT7                                       | enzyme                          | 0.0175 |
| RFFL                                        | enzyme                          | 0.0175 |
| TTC5                                        | other                           | 0.0175 |
| ELOVL2                                      | enzyme                          | 0.0175 |
| BIRC6                                       | enzyme                          | 0.0175 |
| EDEM1                                       | enzyme                          | 0.0175 |
| PYHIN1                                      | other                           | 0.0175 |
| MTCH2                                       | other                           | 0.0175 |
| HDGF                                        | growth factor                   | 0.0175 |
| CTBP1-AS2                                   | other                           | 0.0175 |
| OSR2                                        | transcription regulator         | 0.0175 |
| EXOC3L1                                     | other                           | 0.0175 |
| Eif2                                        | complex                         | 0.0175 |
| CACNA1D                                     | ion channel                     | 0.0175 |
| GTF2F2                                      | transcription regulator         | 0.0175 |
| PSMC3                                       | transcription regulator         | 0.0175 |
| ELL                                         | transcription regulator         | 0.0175 |
| PAG1                                        | other                           | 0.0175 |
| RGS6                                        | enzyme                          | 0.0175 |
| ANXA5                                       | transporter                     | 0.0175 |
| SPTBN1                                      | other                           | 0.0175 |
| MCRS1                                       | other                           | 0.0175 |
| U2AF2                                       | other                           | 0.0175 |
| BPTF                                        | transcription regulator         | 0.0175 |
| HAO1                                        | enzyme                          | 0.0175 |
| miR-330-5p (and other miRNAs w/seed CUCUGGG | mature microRNA                 | 0.0175 |
| DMBT1                                       | transmembrane receptor          | 0.0175 |
| SDHA                                        | enzyme                          | 0.0175 |
| STIP1                                       | other                           | 0.0175 |
| HSPA4                                       | other                           | 0.0175 |
| AHNAK                                       | other                           | 0.0175 |
| TCF20                                       | transcription regulator         | 0.0175 |
| PPP1R1A                                     | phosphatase                     | 0.0175 |
| H3F3A/H3F3B                                 | other                           | 0.0175 |
| CACNA2D1                                    | ion channel                     | 0.0175 |
| DROSHA                                      | enzyme                          | 0.0175 |
| FKBP1B                                      | enzyme                          | 0.0175 |
| TNKS                                        | enzyme                          | 0.0175 |
| SPAG9                                       | other                           | 0.0175 |
| ANK1                                        | other                           | 0.0175 |
| BLM                                         | enzyme                          | 0.0175 |
| RPS7                                        | other                           | 0.0175 |
| MAGI2                                       | kinase                          | 0.0175 |
| CIAPIN1                                     | other                           | 0.0175 |
| INHBC                                       | growth factor                   | 0.0175 |
| ITGB8                                       | other                           | 0.0175 |
| PLK3                                        | kinase                          | 0.0175 |
| HSPH1                                       | other                           | 0.0175 |
| TCP1                                        | other                           | 0.0175 |
| CDC6                                        | other                           | 0.0175 |
| Cacnb1                                      | ion channel                     | 0.0175 |
| SRSF5                                       | other                           | 0.0175 |
| RPL5                                        | other                           | 0.0175 |
| BCKDHA                                      | enzyme                          | 0.0175 |
| UIMC1                                       | other                           | 0.0175 |

|                        |                         |        |
|------------------------|-------------------------|--------|
| Gsk3                   | group                   | 0.018  |
| ZBTB16                 | transcription regulator | 0.018  |
| PRKAA1                 | kinase                  | 0.019  |
| SRC                    | kinase                  | 0.019  |
| CA4                    | enzyme                  | 0.0194 |
| ASXL2                  | other                   | 0.0194 |
| PRKAR1A                | kinase                  | 0.0194 |
| SRSF2                  | transcription regulator | 0.0194 |
| mir-122                | microRNA                | 0.0195 |
| Calcineurin protein(s) | complex                 | 0.0196 |
| ABCA1                  | transporter             | 0.0197 |
| IL7                    | cytokine                | 0.0199 |
| Srebp                  | group                   | 0.02   |
| Ptprd                  | phosphatase             | 0.02   |
| ALDH1A1                | enzyme                  | 0.02   |
| mir-451                | microRNA                | 0.02   |
| PRAME                  | other                   | 0.02   |
| PTPRE                  | phosphatase             | 0.02   |
| SAT1                   | enzyme                  | 0.02   |
| CSF3R                  | transmembrane receptor  | 0.02   |
| SPRY1                  | other                   | 0.02   |
| GTF2I                  | transcription regulator | 0.02   |
| SDCBP                  | enzyme                  | 0.02   |
| PDE5A                  | enzyme                  | 0.02   |
| SOCS2                  | other                   | 0.02   |
| Cyclin A               | group                   | 0.02   |
| TCF/LEF                | group                   | 0.02   |
| ZNF382                 | transcription regulator | 0.02   |
| Presenilin             | group                   | 0.02   |
| VCL                    | enzyme                  | 0.02   |
| MDM4                   | enzyme                  | 0.02   |
| MTBP                   | other                   | 0.02   |
| PLA2G6                 | enzyme                  | 0.02   |
| TIA1                   | other                   | 0.02   |
| SDC2                   | other                   | 0.02   |
| WNT7B                  | other                   | 0.02   |
| PSIP1                  | transcription regulator | 0.02   |
| SOAT1                  | enzyme                  | 0.02   |
| ATXN3                  | peptidase               | 0.02   |
| PAX9                   | transcription regulator | 0.02   |
| PIWIL2                 | other                   | 0.02   |
| PLA2G5                 | enzyme                  | 0.02   |
| TNRC6A                 | other                   | 0.02   |
| ZNF91                  | transcription regulator | 0.02   |
| NDP                    | growth factor           | 0.02   |
| CAMKK2                 | kinase                  | 0.02   |
| ASXL1                  | transcription regulator | 0.0201 |
| PARK2                  | enzyme                  | 0.0201 |
| IL1                    | group                   | 0.0203 |
| DCAF1                  | kinase                  | 0.0208 |
| FUT8                   | enzyme                  | 0.0208 |
| PRKDC                  | kinase                  | 0.0208 |
| SRA1                   | transcription regulator | 0.0208 |
| DLL1                   | enzyme                  | 0.0208 |
| MAT1A                  | enzyme                  | 0.0208 |
| NCL                    | other                   | 0.0208 |
| mir-124                | microRNA                | 0.0208 |
| FOXC1                  | transcription regulator | 0.0208 |
| MSX1                   | transcription regulator | 0.0208 |
| IKZF3                  | transcription regulator | 0.0208 |
| PDGFC                  | growth factor           | 0.0208 |
| SMARCC1                | transcription regulator | 0.0208 |
| SCAP                   | other                   | 0.0211 |
| Nfat (family)          | group                   | 0.0212 |
| NKX2-1                 | transcription regulator | 0.0213 |
| Igm                    | complex                 | 0.0217 |
| RELA                   | transcription regulator | 0.0219 |
| SASH1                  | other                   | 0.0219 |
| RBL2                   | other                   | 0.0223 |

|                                              |                                 |        |
|----------------------------------------------|---------------------------------|--------|
| E2F3                                         | transcription regulator         | 0.0228 |
| LRP6                                         | transmembrane receptor          | 0.0229 |
| FBXW7                                        | transcription regulator         | 0.0229 |
| SND1                                         | enzyme                          | 0.0229 |
| NPPA                                         | other                           | 0.0229 |
| NR1H2                                        | ligand-dependent nuclear recept | 0.0231 |
| EGR3                                         | transcription regulator         | 0.0232 |
| GNB2                                         | enzyme                          | 0.0232 |
| KLF5                                         | transcription regulator         | 0.0236 |
| GCG                                          | other                           | 0.0241 |
| Pkg                                          | group                           | 0.0252 |
| NADPH oxidase                                | complex                         | 0.0252 |
| IPMK                                         | kinase                          | 0.0252 |
| PRKCI                                        | kinase                          | 0.0252 |
| miR-203a-3p (and other miRNAs w/seed UGAAAU) | mature microRNA                 | 0.0252 |
| EIF4G1                                       | translation regulator           | 0.0252 |
| UBE3A                                        | enzyme                          | 0.0252 |
| FABP4                                        | transporter                     | 0.0252 |
| BTG2                                         | transcription regulator         | 0.0252 |
| PBX3                                         | transcription regulator         | 0.0252 |
| HSF1                                         | transcription regulator         | 0.0253 |
| IGFBP2                                       | other                           | 0.0253 |
| CSF2RB                                       | transmembrane receptor          | 0.0256 |
| IGFBP7                                       | transporter                     | 0.0256 |
| BCOR                                         | transcription regulator         | 0.0256 |
| ROCK1                                        | kinase                          | 0.0256 |
| SMC3                                         | other                           | 0.0256 |
| INSIG2                                       | other                           | 0.0256 |
| GADD45B                                      | other                           | 0.0256 |
| MAZ                                          | transcription regulator         | 0.0256 |
| S1PR2                                        | g-protein coupled receptor      | 0.0256 |
| HOXB4                                        | transcription regulator         | 0.0256 |
| EDNRA                                        | transmembrane receptor          | 0.0256 |
| CBX3                                         | transcription regulator         | 0.0256 |
| SPINT1                                       | other                           | 0.0256 |
| IRF1                                         | transcription regulator         | 0.0257 |
| NFATC1                                       | transcription regulator         | 0.0258 |
| CDK4                                         | kinase                          | 0.0258 |
| F2RL1                                        | g-protein coupled receptor      | 0.0263 |
| CASZ1                                        | enzyme                          | 0.0265 |
| IL24                                         | cytokine                        | 0.0265 |
| SUMO3                                        | other                           | 0.0265 |
| NEDD9                                        | other                           | 0.0265 |
| PRKCQ                                        | kinase                          | 0.0268 |
| CLU                                          | other                           | 0.0268 |
| MLXIPL                                       | transcription regulator         | 0.0268 |
| Interferon alpha                             | group                           | 0.0273 |
| TAC1                                         | other                           | 0.0281 |
| MSGN1                                        | transcription regulator         | 0.0283 |
| Pde                                          | group                           | 0.0283 |
| Ck2                                          | complex                         | 0.0283 |
| APH1A                                        | peptidase                       | 0.0283 |
| TENM1                                        | peptidase                       | 0.0283 |
| AGRN                                         | other                           | 0.0283 |
| DUSP16                                       | phosphatase                     | 0.0283 |
| PDGF (family)                                | group                           | 0.0283 |
| AGRP                                         | other                           | 0.0283 |
| mir-378                                      | microRNA                        | 0.0283 |
| PLCB1                                        | enzyme                          | 0.0283 |
| RB1CC1                                       | other                           | 0.0283 |
| AIMP2                                        | other                           | 0.0283 |
| CDK6                                         | kinase                          | 0.0283 |
| EYA1                                         | phosphatase                     | 0.0283 |
| UTS2R                                        | g-protein coupled receptor      | 0.0283 |
| CRTC1                                        | transcription regulator         | 0.0283 |
| PNPT1                                        | enzyme                          | 0.0283 |
| IREB2                                        | translation regulator           | 0.0283 |
| DBH                                          | enzyme                          | 0.0283 |
| SLC30A3                                      | transporter                     | 0.0283 |



|                                              |                                 |        |
|----------------------------------------------|---------------------------------|--------|
| GRB2                                         | kinase                          | 0.0284 |
| ADRA1B                                       | g-protein coupled receptor      | 0.0284 |
| PTGS2                                        | enzyme                          | 0.0289 |
| SIRT6                                        | enzyme                          | 0.0293 |
| PRKCB                                        | kinase                          | 0.0293 |
| PLN                                          | transporter                     | 0.0293 |
| NEUROG1                                      | transcription regulator         | 0.0293 |
| E2F2                                         | transcription regulator         | 0.0293 |
| HDL                                          | complex                         | 0.0302 |
| MEN1                                         | transcription regulator         | 0.0302 |
| GNB1                                         | enzyme                          | 0.0302 |
| PDGF-DD                                      | complex                         | 0.0302 |
| NR2E1                                        | ligand-dependent nuclear recept | 0.0302 |
| FAM3B                                        | cytokine                        | 0.0302 |
| FGF9                                         | growth factor                   | 0.0302 |
| HDAC3                                        | transcription regulator         | 0.0306 |
| MIF                                          | cytokine                        | 0.0308 |
| CDK2                                         | kinase                          | 0.0311 |
| FLT1                                         | kinase                          | 0.0315 |
| ATG7                                         | enzyme                          | 0.0319 |
| GATA6                                        | transcription regulator         | 0.0319 |
| LIN28B                                       | other                           | 0.032  |
| CGB3 (includes others)                       | other                           | 0.032  |
| CTBP2                                        | transcription regulator         | 0.032  |
| miR-205-5p (and other miRNAs w/seed CCUUCAU) | mature microRNA                 | 0.032  |
| MAFG                                         | transcription regulator         | 0.032  |
| CHEK2                                        | kinase                          | 0.032  |
| DIRAS3                                       | enzyme                          | 0.032  |
| Rhox5                                        | transcription regulator         | 0.032  |
| SMURF2                                       | enzyme                          | 0.032  |
| DSP                                          | other                           | 0.032  |
| SMAD6                                        | transcription regulator         | 0.032  |
| JUND                                         | transcription regulator         | 0.0322 |
| GNRH1                                        | other                           | 0.0324 |
| Pln                                          | other                           | 0.0324 |
| CD24                                         | other                           | 0.0325 |
| GSK3B                                        | kinase                          | 0.0325 |
| TR-RXR                                       | complex                         | 0.0332 |
| PROM1                                        | other                           | 0.0332 |
| ATF6B                                        | transcription regulator         | 0.0332 |
| USE1                                         | other                           | 0.0332 |
| NOX5                                         | ion channel                     | 0.0332 |
| HCAR1                                        | g-protein coupled receptor      | 0.0332 |
| LEO1                                         | other                           | 0.0332 |
| SP6                                          | transcription regulator         | 0.0332 |
| SLCO1C1                                      | transporter                     | 0.0332 |
| NLN                                          | peptidase                       | 0.0332 |
| ARID2                                        | transcription regulator         | 0.0332 |
| ASPN                                         | other                           | 0.0332 |
| USP22                                        | peptidase                       | 0.0332 |
| MUCL1                                        | other                           | 0.0332 |
| RAB23                                        | enzyme                          | 0.0332 |
| DACT3                                        | other                           | 0.0332 |
| K Channel                                    | complex                         | 0.0332 |
| CDCA2                                        | other                           | 0.0332 |
| P-TEFb                                       | complex                         | 0.0332 |
| NEAT1                                        | other                           | 0.0332 |
| UNG                                          | enzyme                          | 0.0332 |
| TBR1                                         | transcription regulator         | 0.0332 |
| HDAC10                                       | transcription regulator         | 0.0332 |
| MBNL1                                        | other                           | 0.0332 |
| ZNF281                                       | transcription regulator         | 0.0332 |
| RPS11                                        | other                           | 0.0332 |
| CDC25B                                       | phosphatase                     | 0.0332 |
| CELA2A                                       | peptidase                       | 0.0332 |
| GGA1                                         | transporter                     | 0.0332 |
| CSH1/CSH2                                    | other                           | 0.0332 |
| Nppb                                         | other                           | 0.0332 |
| CACNB4                                       | ion channel                     | 0.0332 |

|                                              |                            |        |
|----------------------------------------------|----------------------------|--------|
| STRA6                                        | other                      | 0.0332 |
| miR-515-5p (and other miRNAs w/seed UCUCCAA) | mature microRNA            | 0.0332 |
| miR-516a-3p (and other miRNAs w/seed GCUUCC) | mature microRNA            | 0.0332 |
| miR-127-3p (miRNAs w/seed CGGAUCC)           | mature microRNA            | 0.0332 |
| miR-324-5p (miRNAs w/seed GCAUCCC)           | mature microRNA            | 0.0332 |
| BOK                                          | other                      | 0.0332 |
| MPP5                                         | kinase                     | 0.0332 |
| NUCB2                                        | other                      | 0.0332 |
| CALCR                                        | g-protein coupled receptor | 0.0332 |
| ANKH                                         | transporter                | 0.0332 |
| LIMK1                                        | kinase                     | 0.0332 |
| PER3                                         | other                      | 0.0332 |
| DLL3                                         | other                      | 0.0332 |
| PIP5K1C                                      | kinase                     | 0.0332 |
| CYP11B2                                      | enzyme                     | 0.0332 |
| SIGMAR1                                      | transmembrane receptor     | 0.0332 |
| CHRM4                                        | g-protein coupled receptor | 0.0332 |
| VLDLR                                        | transporter                | 0.0332 |
| KLK6                                         | peptidase                  | 0.0332 |
| UBE2D1                                       | enzyme                     | 0.0332 |
| RGD1560225                                   | other                      | 0.0332 |
| APLP2                                        | other                      | 0.0332 |
| PTCH2                                        | transmembrane receptor     | 0.0332 |
| PTP4A2                                       | phosphatase                | 0.0332 |
| RPS5                                         | other                      | 0.0332 |
| DYNC2LI1                                     | other                      | 0.0332 |
| SLC37A4                                      | transporter                | 0.0332 |
| LETMD1                                       | other                      | 0.0332 |
| VSNL1                                        | other                      | 0.0332 |
| RPS18                                        | other                      | 0.0332 |
| PLAC8                                        | other                      | 0.0332 |
| BARD1                                        | transcription regulator    | 0.0332 |
| CDON                                         | other                      | 0.0332 |
| MYH9                                         | enzyme                     | 0.0332 |
| TWSG1                                        | other                      | 0.0332 |
| ZKSCAN3                                      | transcription regulator    | 0.0332 |
| MAD1L1                                       | other                      | 0.0332 |
| ARNT2                                        | transcription regulator    | 0.0333 |
| KLF3                                         | transcription regulator    | 0.0338 |
| JAK3                                         | kinase                     | 0.0342 |
| VIP                                          | other                      | 0.0349 |
| MAP2K1/2                                     | group                      | 0.0353 |
| HIPK2                                        | kinase                     | 0.0353 |
| calpain                                      | complex                    | 0.0358 |
| NAMPT                                        | cytokine                   | 0.0358 |
| SIX1                                         | transcription regulator    | 0.0358 |
| DRAP1                                        | transcription regulator    | 0.0358 |
| NFIL3                                        | transcription regulator    | 0.0358 |
| NTRK2                                        | kinase                     | 0.0358 |
| NPM1                                         | transcription regulator    | 0.0358 |
| GJA1                                         | transporter                | 0.0358 |
| BSG                                          | transporter                | 0.0358 |
| ACVRL1                                       | kinase                     | 0.0358 |
| HIST1H1T                                     | other                      | 0.0359 |
| Hist1h1a                                     | other                      | 0.0359 |
| DPY30                                        | enzyme                     | 0.0381 |
| CMKLR1                                       | g-protein coupled receptor | 0.0381 |
| EIF4G2                                       | translation regulator      | 0.0381 |
| MXD1                                         | transcription regulator    | 0.0381 |
| MYF5                                         | transcription regulator    | 0.0381 |
| TIMP2                                        | other                      | 0.0381 |
| RLIM                                         | enzyme                     | 0.0381 |
| miR-223-3p (miRNAs w/seed GUCAGUU)           | mature microRNA            | 0.0381 |
| RAMP1                                        | transporter                | 0.0381 |
| IL9R                                         | transmembrane receptor     | 0.0381 |
| ADIPOR2                                      | transmembrane receptor     | 0.0381 |
| MEOX1                                        | transcription regulator    | 0.0381 |
| PIM3                                         | kinase                     | 0.0381 |
| GBX2                                         | transcription regulator    | 0.0381 |

|                                              |                                 |        |
|----------------------------------------------|---------------------------------|--------|
| COPS8                                        | other                           | 0.0381 |
| MAPKAPK3                                     | kinase                          | 0.0381 |
| AEBP1                                        | peptidase                       | 0.0381 |
| CAMK2A                                       | kinase                          | 0.0381 |
| STK40                                        | kinase                          | 0.0386 |
| PPP2CA                                       | phosphatase                     | 0.0386 |
| HDAC6                                        | transcription regulator         | 0.0386 |
| ATF1                                         | transcription regulator         | 0.0386 |
| TXN                                          | enzyme                          | 0.0386 |
| NR4A2                                        | ligand-dependent nuclear recept | 0.0386 |
| Smad2/3-Smad4                                | complex                         | 0.0394 |
| Hmgb1                                        | transcription regulator         | 0.0394 |
| TF                                           | transporter                     | 0.0394 |
| PHLPP1                                       | enzyme                          | 0.0394 |
| SOX6                                         | transcription regulator         | 0.0394 |
| THY1                                         | other                           | 0.0394 |
| TMBIM6                                       | other                           | 0.0394 |
| PLD2                                         | enzyme                          | 0.0394 |
| C5                                           | other                           | 0.0394 |
| TRIM24                                       | transcription regulator         | 0.0396 |
| TICAM1                                       | other                           | 0.0399 |
| MYB                                          | transcription regulator         | 0.0403 |
| Rar                                          | group                           | 0.041  |
| RAB1B                                        | other                           | 0.041  |
| HLX                                          | transcription regulator         | 0.041  |
| CAMK4                                        | kinase                          | 0.041  |
| PTTG1                                        | transcription regulator         | 0.041  |
| PPARD                                        | ligand-dependent nuclear recept | 0.0415 |
| NFIC                                         | transcription regulator         | 0.0419 |
| DOCK8                                        | other                           | 0.0421 |
| C5                                           | cytokine                        | 0.0429 |
| TAZ                                          | enzyme                          | 0.0433 |
| TFRC                                         | transporter                     | 0.0433 |
| EHMT2                                        | transcription regulator         | 0.0433 |
| POR                                          | enzyme                          | 0.0437 |
| TSLP                                         | cytokine                        | 0.0466 |
| IL27RA                                       | transmembrane receptor          | 0.0466 |
| Pro-inflammatory Cytokine                    | group                           | 0.0474 |
| SIRT2                                        | transcription regulator         | 0.0476 |
| SLC2A4                                       | transporter                     | 0.0476 |
| miR-218-5p (and other miRNAs w/seed UGUGCUU  | mature microRNA                 | 0.0476 |
| CD22                                         | transmembrane receptor          | 0.0476 |
| MGAT5                                        | enzyme                          | 0.0476 |
| NFASC                                        | other                           | 0.0476 |
| ACVR1C                                       | kinase                          | 0.0476 |
| RPS6KA5                                      | kinase                          | 0.0476 |
| FDFT1                                        | enzyme                          | 0.0476 |
| NPC2                                         | other                           | 0.0476 |
| CREB3L1                                      | transcription regulator         | 0.0476 |
| HES3                                         | other                           | 0.0483 |
| CEBPE                                        | transcription regulator         | 0.0484 |
| RTN4                                         | other                           | 0.0484 |
| CDX1                                         | transcription regulator         | 0.0484 |
| DCN                                          | other                           | 0.0484 |
| AHI1                                         | other                           | 0.0487 |
| DLL4                                         | other                           | 0.0487 |
| GAS6                                         | growth factor                   | 0.0487 |
| TRIB3                                        | kinase                          | 0.0487 |
| UBE2I                                        | enzyme                          | 0.0487 |
| mGluR                                        | group                           | 0.0494 |
| Gcn5l                                        | group                           | 0.0494 |
| PIAS2                                        | transcription regulator         | 0.0494 |
| CHRM3                                        | g-protein coupled receptor      | 0.0494 |
| miR-101-3p (and other miRNAs w/seed ACAGUAC) | mature microRNA                 | 0.0494 |
| miR-135a-5p (and other miRNAs w/seed AUGGCU) | mature microRNA                 | 0.0494 |
| DRD1                                         | g-protein coupled receptor      | 0.0494 |
| RUVBL2                                       | transcription regulator         | 0.0494 |
| IGFBP1                                       | other                           | 0.0494 |
| LIMA1                                        | other                           | 0.0494 |

|               |                         |        |
|---------------|-------------------------|--------|
| CDKN2C        | transcription regulator | 0.0494 |
| TRRAP         | transcription regulator | 0.0494 |
| DDX17         | enzyme                  | 0.0494 |
| BRD7          | transcription regulator | 0.0494 |
| PARP2         | enzyme                  | 0.0494 |
| CHRNA3        | transmembrane receptor  | 0.0494 |
| RFX2          | transcription regulator | 0.0494 |
| HIST2H3C      | other                   | 0.0494 |
| HSPA1A/HSPA1B | enzyme                  | 0.0494 |
| S100A7        | other                   | 0.0494 |

Overlap Results

| Collection(s):             | CP    | (Canonical Pathways) |
|----------------------------|-------|----------------------|
| # overlaps shown:          | 100   |                      |
| # genesets in collections: | 1329  |                      |
| # genes in comparison (n): | 1701  |                      |
| # genes in universe (N):   | 45956 |                      |

| Gene Set Name                                                     | # Genes in Gene Set (K) | Description                                                                                                               | # Genes in Overlap (k) | k/K    | p-value  | FDR q-value |
|-------------------------------------------------------------------|-------------------------|---------------------------------------------------------------------------------------------------------------------------|------------------------|--------|----------|-------------|
| KEGG_PATHWAYS_IN_CANCER                                           | 328                     | Pathways in cancer                                                                                                        | 79                     | 0.2409 | 4.29E-41 | 5.70E-38    |
| REACTOME_DEVELOPMENTAL_BIOLOGY                                    | 396                     | Genes involved in Developmental Biology                                                                                   | 79                     | 0.1995 | 7.33E-35 | 4.87E-32    |
| REACTOME_IMMUNE_SYSTEM                                            | 933                     | Genes involved in Immune System                                                                                           | 120                    | 0.1286 | 1.27E-32 | 5.62E-30    |
| REACTOME_HEMOSTASIS                                               | 466                     | Genes involved in Hemostasis                                                                                              | 76                     | 0.1631 | 1.41E-27 | 4.68E-25    |
| REACTOME_AXON_GUIDANCE                                            | 251                     | Genes involved in Axon guidance                                                                                           | 55                     | 0.2191 | 8.63E-27 | 2.29E-24    |
| REACTOME_ADAPTIVE_IMMUNE_SYSTEM                                   | 539                     | Genes involved in Adaptive Immune System                                                                                  | 79                     | 0.1466 | 1.73E-25 | 3.83E-23    |
| KEGG_MAPK_SIGNALING_PATHWAY                                       | 267                     | MAPK signaling pathway                                                                                                    | 54                     | 0.2022 | 1.52E-24 | 2.89E-22    |
| KEGG_WNT_SIGNALING_PATHWAY                                        | 151                     | Wnt signaling pathway                                                                                                     | 38                     | 0.2517 | 3.39E-21 | 5.63E-19    |
| KEGG_BASAL_CELL_CARCIOMA                                          | 55                      | Basal cell carcinoma                                                                                                      | 23                     | 0.4182 | 6.11E-19 | 8.93E-17    |
| REACTOME_NEURONAL_SYSTEM                                          | 279                     | Genes involved in Neuronal System                                                                                         | 48                     | 0.172  | 6.72E-19 | 8.93E-17    |
| WNT_SIGNALING                                                     | 89                      | Genes related to Wnt-mediated signal transduction                                                                         | 28                     | 0.3146 | 7.96E-19 | 9.62E-17    |
| KEGG_FOCAL_ADHESION                                               | 201                     | Focal adhesion                                                                                                            | 40                     | 0.199  | 2.74E-18 | 3.03E-16    |
| KEGG_AXON_GUIDANCE                                                | 129                     | Axon guidance                                                                                                             | 32                     | 0.2481 | 7.05E-18 | 7.20E-16    |
| NABA_MATRISOME                                                    | 1028                    | Ensemble of genes encoding extracellular matrix and extracellular matrix-associated proteins                              | 98                     | 0.0953 | 1.98E-17 | 1.88E-15    |
| PID_PDGFBR_PATHWAY                                                | 129                     | PDGFR-beta signaling pathway                                                                                              | 30                     | 0.2326 | 5.09E-16 | 4.51E-14    |
| REACTOME_METABOLISM_OF_LIPIDS_AND_LIPOPROTEINS                    | 478                     | Genes involved in Metabolism of lipids and lipoproteins                                                                   | 59                     | 0.1234 | 7.94E-16 | 6.60E-14    |
| KEGG_HEDGEHOG_SIGNALING_PATHWAY                                   | 56                      | Hedgehog signaling pathway                                                                                                | 20                     | 0.3571 | 4.59E-15 | 3.59E-13    |
| KEGG_REGULATION_OF_ACTIN_CYTOSKELETON                             | 216                     | Regulation of actin cytoskeleton                                                                                          | 36                     | 0.1667 | 4.24E-14 | 3.13E-12    |
| KEGG_CHRONIC_MYELOID_LEUKEMIA                                     | 73                      | Chronic myeloid leukemia                                                                                                  | 21                     | 0.2877 | 1.31E-13 | 9.17E-12    |
| REACTOME_CLASS_I_MHC_MEDIATED_ANTIGEN_PROCESSING_PRESENTATION     | 251                     | Genes involved in Class I MHC mediated antigen processing & presentation                                                  | 38                     | 0.1514 | 1.95E-13 | 1.29E-11    |
| REACTOME_SIGNALLING_BY_NGF                                        | 217                     | Genes involved in Signalling by NGF                                                                                       | 35                     | 0.1613 | 2.58E-13 | 1.64E-11    |
| KEGG_MELANOGENESIS                                                | 102                     | Melanogenesis                                                                                                             | 24                     | 0.2353 | 3.18E-13 | 1.92E-11    |
| REACTOME_PLATELET_ACTIVATION_SIGNALING_AND_AGGREGATION            | 208                     | Genes involved in Platelet activation, signaling and aggregation                                                          | 34                     | 0.1635 | 3.80E-13 | 2.20E-11    |
| REACTOME_SIGNALING_BY_EGFR_IN_CANCER                              | 109                     | Genes involved in Signaling by EGFR in Cancer                                                                             | 24                     | 0.2202 | 1.50E-12 | 8.28E-11    |
| REACTOME_CYTOKINE_SIGNALING_IN_IMMUNE_SYSTEM                      | 270                     | Genes involved in Cytokine Signaling in Immune system                                                                     | 38                     | 0.1407 | 1.96E-12 | 1.04E-10    |
| REACTOME_TRANSMISSION_ACROSS_CHEMICAL_SYNAPSES                    | 186                     | Genes involved in Transmission across Chemical Synapses                                                                   | 31                     | 0.1667 | 2.42E-12 | 1.21E-10    |
| REACTOME_CELL_CYCLE_MITOTIC                                       | 325                     | Genes involved in Cell Cycle, Mitotic                                                                                     | 42                     | 0.1292 | 2.46E-12 | 1.21E-10    |
| NABA_MATRISOME_ASSOCIATED                                         | 753                     | Ensemble of genes encoding ECM-associated proteins including ECM-affiliated proteins, ECM regulators and secreted factors | 70                     | 0.093  | 2.61E-12 | 1.24E-10    |
| REACTOME_SIGNALING_BY_PDGF                                        | 122                     | Genes involved in Signaling by PDGF                                                                                       | 25                     | 0.2049 | 2.84E-12 | 1.30E-10    |
| PID_ERBB1_DOWNSTREAM_PATHWAY                                      | 105                     | ErbB1 downstream signaling                                                                                                | 23                     | 0.219  | 4.87E-12 | 2.16E-10    |
| REACTOME_SIGNALING_BY_SCF_KIT                                     | 78                      | Genes involved in Signaling by SCF-KIT                                                                                    | 20                     | 0.2564 | 5.31E-12 | 2.28E-10    |
| REACTOME_SIGNALING_BY_FGFR_IN_DISEASE                             | 127                     | Genes involved in Signaling by FGFR in disease                                                                            | 25                     | 0.1969 | 7.26E-12 | 2.97E-10    |
| REACTOME_SIGNALING_BY_ILS                                         | 107                     | Genes involved in Signaling by Interleukins                                                                               | 23                     | 0.215  | 7.38E-12 | 2.97E-10    |
| KEGG_ENDOCYTOSIS                                                  | 183                     | Endocytosis                                                                                                               | 30                     | 0.1639 | 8.37E-12 | 3.27E-10    |
| KEGG_CELL_CYCLE                                                   | 128                     | Cell cycle                                                                                                                | 19                     | 0.1953 | 8.71E-12 | 3.31E-10    |
| KEGG_ADHERENS_JUNCTION                                            | 75                      | Adherens junction                                                                                                         | 25                     | 0.2533 | 2.27E-11 | 8.36E-10    |
| PID_PTP1B_PATHWAY                                                 | 52                      | Signaling events mediated by PTP1B                                                                                        | 19                     | 0.3077 | 3.40E-11 | 1.22E-09    |
| REACTOME_NGF_SIGNALLING_VIA_TRKA_FROM_THE_PLASMA_MEMBRANE         | 137                     | Genes involved in NGF signalling via TRKA from the plasma membrane                                                        | 25                     | 0.1825 | 4.12E-11 | 1.44E-09    |
| KEGG_UBIQUITIN_MEDIATED_PROTEOLYSIS                               | 138                     | Ubiquitin mediated proteolysis                                                                                            | 25                     | 0.1812 | 4.86E-11 | 1.66E-09    |
| PID_CDC42_PATHWAY                                                 | 70                      | CDC42 signaling events                                                                                                    | 18                     | 0.2571 | 5.78E-11 | 1.91E-09    |
| NABA_SECRETED_FACTORS                                             | 344                     | Genes encoding secreted soluble factors                                                                                   | 41                     | 0.1192 | 5.89E-11 | 1.91E-09    |
| REACTOME_INTEGRIN_CELL_SURFACE_INTERACTIONS                       | 79                      | Genes involved in integrin cell surface interactions                                                                      | 19                     | 0.2405 | 6.06E-11 | 1.92E-09    |
| KEGG_PROSTATE_CANCER                                              | 89                      | Prostate cancer                                                                                                           | 20                     | 0.2247 | 7.21E-11 | 2.23E-09    |
| REACTOME_CELL_CYCLE                                               | 421                     | Genes involved in Cell Cycle                                                                                              | 46                     | 0.1093 | 8.04E-11 | 2.39E-09    |
| BIOCARTA_P38MAPK_PATHWAY                                          | 40                      | p38 MAPK Signaling Pathway                                                                                                | 14                     | 0.35   | 8.08E-11 | 2.39E-09    |
| PID_TGFR_PATHWAY                                                  | 55                      | TGF-beta receptor signaling                                                                                               | 16                     | 0.2909 | 8.79E-11 | 2.53E-09    |
| REACTOME_SIGNALING_BY_ERBB4                                       | 90                      | Genes involved in Signaling by ERBB4                                                                                      | 20                     | 0.2222 | 8.95E-11 | 2.53E-09    |
| PID_AJISS_2PATHWAY                                                | 48                      | Posttranslational regulation of adherens junction stability and disassembly                                               | 15                     | 0.3125 | 1.09E-10 | 3.02E-09    |
| REACTOME_SIGNALING_BY_ERBB2                                       | 101                     | Genes involved in Signaling by ERBB2                                                                                      | 21                     | 0.2079 | 1.16E-10 | 3.14E-09    |
| PID_CXCR4_PATHWAY                                                 | 102                     | CXCR4-mediated signaling events                                                                                           | 21                     | 0.2059 | 1.41E-10 | 3.74E-09    |
| REACTOME_NUCLEAR_RECEPTOR_TRANSCRIPTION_PATHWAY                   | 49                      | Genes involved in Nuclear Receptor transcription pathway                                                                  | 15                     | 0.3061 | 1.52E-10 | 3.95E-09    |
| PID_CMYB_PATHWAY                                                  | 84                      | C-MYB transcription factor network                                                                                        | 19                     | 0.2262 | 1.90E-10 | 4.86E-09    |
| REACTOME_SIGNALING_BY_THE_B_CELL_RECEPTOR_BCR                     | 126                     | Genes involved in Signaling by the B Cell Receptor (BCR)                                                                  | 23                     | 0.1825 | 2.44E-10 | 6.05E-09    |
| PID_TCPTP_PATHWAY                                                 | 43                      | Signaling events mediated by TCPTP                                                                                        | 14                     | 0.3256 | 2.46E-10 | 6.05E-09    |
| REACTOME_DOWNSTREAM_SIGNAL_TRANSDUCTION                           | 95                      | Genes involved in Downstream signal transduction                                                                          | 20                     | 0.2105 | 2.52E-10 | 6.09E-09    |
| REACTOME_PHOSPHOLIPID_METABOLISM                                  | 198                     | Genes involved in Phospholipid metabolism                                                                                 | 19                     | 0.1465 | 3.01E-10 | 7.14E-09    |
| BIOCARTA_MAPK_PATHWAY                                             | 87                      | MAPKase Signaling Pathway                                                                                                 | 29                     | 0.2184 | 3.62E-10 | 8.43E-09    |
| REACTOME_PLATELET_HOMEOSTASIS                                     | 78                      | Genes involved in Platelet homeostasis                                                                                    | 18                     | 0.2308 | 4.00E-10 | 9.17E-09    |
| PID_AP1_PATHWAY                                                   | 70                      | AP-1 transcription factor network                                                                                         | 17                     | 0.2429 | 5.20E-10 | 1.17E-08    |
| REACTOME_INTEGRATION_OF_ENERGY_METABOLISM                         | 120                     | Genes involved in integration of energy metabolism                                                                        | 22                     | 0.1833 | 5.45E-10 | 1.21E-08    |
| REACTOME_DOWNSTREAM_SIGNALING_OF_ACTIVATED_FGFR                   | 100                     | Genes involved in Downstream signaling of activated FGFR                                                                  | 20                     | 0.2    | 6.61E-10 | 1.44E-08    |
| REACTOME_DNA_REPLICATION                                          | 192                     | Genes involved in DNA Replication                                                                                         | 28                     | 0.1458 | 6.70E-10 | 1.44E-08    |
| PID_RAC1_PATHWAY                                                  | 54                      | RAC1 signaling pathway                                                                                                    | 15                     | 0.2778 | 7.00E-10 | 1.48E-08    |
| PID_WNT_NONCANONICAL_PATHWAY                                      | 32                      | Noncanonical Wnt signaling pathway                                                                                        | 12                     | 0.375  | 7.22E-10 | 1.50E-08    |
| KEGG_GNRH_SIGNALING_PATHWAY                                       | 101                     | GnRH signaling pathway                                                                                                    | 20                     | 0.198  | 7.96E-10 | 1.63E-08    |
| REACTOME_CELL_SURFACE_INTERACTIONS_AT_THE_VASCULAR_WALL           | 91                      | Genes involved in Cell surface interactions at the vascular wall                                                          | 19                     | 0.2088 | 8.15E-10 | 1.64E-08    |
| REACTOME_SIGNALING_BY_FGFR                                        | 112                     | Genes involved in Signaling by FGFR                                                                                       | 21                     | 0.1875 | 8.70E-10 | 1.73E-08    |
| PID_IL2_1PATHWAY                                                  | 55                      | IL2-mediated signaling events                                                                                             | 15                     | 0.2727 | 9.30E-10 | 1.82E-08    |
| ST_INTEGRIN_SIGNALING_PATHWAY                                     | 82                      | Integrin Signaling Pathway                                                                                                | 19                     | 0.2195 | 9.57E-10 | 1.84E-08    |
| KEGG_DILATED_CARDIOMYOPATHY                                       | 92                      | Dilated cardiomyopathy                                                                                                    | 18                     | 0.2065 | 9.93E-10 | 1.88E-08    |
| REACTOME_NCAM_SIGNALING_FOR_NEURITE_OUT_GROWTH                    | 64                      | Genes involved in NCAM signaling for neurite out-growth                                                                   | 16                     | 0.25   | 1.05E-09 | 1.97E-08    |
| REACTOME_MITOTIC_M_M_G1_PHASES                                    | 172                     | Genes involved in Mitotic M-M/G1 phases                                                                                   | 26                     | 0.1512 | 1.23E-09 | 2.27E-08    |
| KEGG_GLIOMA                                                       | 65                      | Glioma                                                                                                                    | 16                     | 0.2462 | 1.35E-09 | 2.42E-08    |
| PID_RB_1PATHWAY                                                   | 65                      | Regulation of retinoblastoma protein                                                                                      | 16                     | 0.2462 | 1.35E-09 | 2.42E-08    |
| REACTOME_ANTIGEN_PROCESSING_UBIQUITINATION_PROTEASOME_DEGRADATION | 212                     | Genes involved in Antigen processing: Ubiquitination & Proteasome degradation                                             | 29                     | 0.1368 | 1.54E-09 | 2.73E-08    |
| KEGG_TGF_BETA_SIGNALING_PATHWAY                                   | 86                      | TGF-beta signaling pathway                                                                                                | 18                     | 0.2093 | 2.17E-09 | 3.72E-08    |
| REACTOME_L1CAM_INTERACTIONS                                       | 86                      | Genes involved in L1CAM interactions                                                                                      | 18                     | 0.2093 | 2.17E-09 | 3.72E-08    |
| SIG_PIP3_SIGNALING_IN_CARDIAC_MYOCYTES                            | 67                      | Genes related to PIP3 signaling in cardiac myocytes                                                                       | 16                     | 0.2388 | 2.18E-09 | 3.72E-08    |
| KEGG_CHEMOKINE_SIGNALING_PATHWAY                                  | 190                     | Chemokine signaling pathway                                                                                               | 17                     | 0.1421 | 2.40E-09 | 4.00E-08    |
| ST_G_ALPHA_1_PATHWAY                                              | 35                      | G alpha 1 Pathway                                                                                                         | 22                     | 0.3429 | 2.41E-09 | 4.00E-08    |
| KEGG_FC_GAMMA_R_MEDIATED_PHAGOCYTOSIS                             | 97                      | Fc gamma R-mediated phagocytosis                                                                                          | 19                     | 0.1959 | 2.54E-09 | 4.17E-08    |
| KEGG_ERBB_SIGNALING_PATHWAY                                       | 87                      | ErbB signaling pathway                                                                                                    | 18                     | 0.2069 | 2.64E-09 | 4.28E-08    |
| PID_ATF2_PATHWAY                                                  | 59                      | ATF-2 transcription factor network                                                                                        | 15                     | 0.2542 | 2.71E-09 | 4.34E-08    |
| SIG_INSULIN_RECEPTOR_PATHWAY_IN_CARDIAC_MYOCYTES                  | 51                      | Genes related to the insulin receptor pathway                                                                             | 14                     | 0.2745 | 3.07E-09 | 4.86E-08    |
| REACTOME_CLASS_B_2_SECRETIN_FAMILY_RECEPTORS                      | 88                      | Genes involved in Class B/2 (Secretin family receptors)                                                                   | 17                     | 0.2045 | 3.20E-09 | 5.01E-08    |
| PID_P73PATHWAY                                                    | 79                      | p73 transcription factor network                                                                                          | 18                     | 0.2152 | 3.85E-09 | 5.95E-08    |
| PID_KIT_PATHWAY                                                   | 52                      | Signaling events mediated by Stem cell factor receptor (c-Kit)                                                            | 14                     | 0.2692 | 4.06E-09 | 6.20E-08    |
| KEGG_PANCREATIC_CANCER                                            | 70                      | Pancreatic cancer                                                                                                         | 16                     | 0.2286 | 4.34E-09 | 6.48E-08    |
| KEGG_RENAL_CELL_CARCIOMA                                          | 70                      | Renal cell carcinoma                                                                                                      | 16                     | 0.2286 | 4.34E-09 | 6.48E-08    |
| KEGG_GAP_JUNCTION                                                 | 90                      | Gap junction                                                                                                              | 18                     | 0.2    | 4.68E-09 | 6.91E-08    |
| KEGG_MELANOMA                                                     | 71                      | Melanoma                                                                                                                  | 16                     | 0.2254 | 5.41E-09 | 7.90E-08    |
| BIOCARTA_BIOPEPPTIDES_PATHWAY                                     | 45                      | Bioactive Peptide Induced Signaling Pathway                                                                               | 13                     | 0.2889 | 5.65E-09 | 8.14E-08    |
| PID_TRKR_PATHWAY                                                  | 62                      | Neurotrophic factor-mediated Trk receptor signaling                                                                       | 15                     | 0.2419 | 5.70E-09 | 8.14E-08    |
| PID_LYMPH_ANGIOGENESIS_PATHWAY                                    | 25                      | VEGFR3 signaling in lymphatic endothelium                                                                                 | 10                     | 0.4    | 9.24E-09 | 1.31E-07    |
| PID_IL6_7_PATHWAY                                                 | 47                      | IL6-mediated signaling events                                                                                             | 13                     | 0.2766 | 1.02E-08 | 1.42E-07    |
| KEGG_HYPERTROPHIC_CARDIOMYOPATHY_HCM                              | 85                      | Hypertrophic cardiomyopathy (HCM)                                                                                         | 17                     | 0.2    | 1.25E-08 | 1.73E-07    |
| PID_EPHB_FWD_PATHWAY                                              | 40                      | EPHB forward signaling                                                                                                    | 12                     | 0.3    | 1.36E-08 | 1.86E-07    |
| PID_HIF1_TFPATHWAY                                                | 66                      | HIF-1-alpha transcription factor network                                                                                  | 15                     | 0.2273 | 1.43E-08 | 1.94E-07    |
| REACTOME_DOWNSTREAM_SIGNALING_EVENTS_OF_B_CELL_RECEPTOR_BCR       | 97                      | Genes involved in Downstream Signaling Events Of B Cell Receptor (BCR)                                                    | 18                     | 0.1856 | 1.62E-08 | 2.18E-07    |
| BIOCARTA_IL3_PATHWAY                                              | 15                      | IL 3 signaling pathway                                                                                                    | 8                      | 0.5333 | 1.77E-08 | 2.35E-07    |

Gene/Gene Set Overlap Matrix

| Entrez Gene Id | Gene Symbol | Gene Description                                                                             | KEGG_PATHWAYS_IN_CANCER | REACTOME_DEVELOPMENTAL_BIOLOGY | REACTOME_IMMUNE_SYSTEM | REACTOME_HEMOSTASIS |
|----------------|-------------|----------------------------------------------------------------------------------------------|-------------------------|--------------------------------|------------------------|---------------------|
| 5894           | RAF1        | v-raf-1 murine leukemia viral oncogene homolog 1                                             |                         |                                |                        |                     |
| 998            | CDC42       | cell division cycle 42 (GTP binding protein, 25kDa)                                          |                         |                                |                        |                     |
| 6654           | SOS1        | son of sevenless homolog 1 (Drosophila)                                                      |                         |                                |                        |                     |
| 2885           | GRB2        | growth factor receptor-bound protein 2                                                       |                         |                                |                        |                     |
| 3845           | KRAS        | v-Ki-ras2 Kirsten rat sarcoma viral oncogene homolog                                         |                         |                                |                        |                     |
| 3688           | ITGB1       | integrin, beta 1 (fibronectin receptor, beta polypeptide, antigen CD29 includes MDF2, MSK12) |                         |                                |                        |                     |
| 3685           | ITGAV       | integrin, alpha V (vitronectin receptor, alpha polypeptide, antigen CD51)                    |                         |                                |                        |                     |
| 2308           | FOXO1       | forkhead box O1                                                                              |                         |                                |                        |                     |
| 3673           | ITGA2       | integrin, alpha 2 (CD49B, alpha 2 subunit of VLA-2 receptor)                                 |                         |                                |                        |                     |
| 7040           | TGFBR1      | transforming growth factor, beta 1                                                           |                         |                                |                        |                     |
| 1956           | EGFR        | epidermal growth factor receptor                                                             |                         |                                |                        |                     |
| 2260           | FGFR1       | fibroblast growth factor receptor 1                                                          |                         |                                |                        |                     |
| 4233           | MET         | met proto-oncogene (hepatocyte growth factor receptor)                                       |                         |                                |                        |                     |
| 3915           | LAMC1       | laminin, gamma 1 (formerly LAMB2)                                                            |                         |                                |                        |                     |
| 5468           | PPARG       | peroxisome proliferator-activated receptor gamma                                             |                         |                                |                        |                     |
| 7189           | TRAF6       | TNF receptor-associated factor 6                                                             |                         |                                |                        |                     |
| 5728           | PTEN        | phosphatase and tensin homolog                                                               |                         |                                |                        |                     |
| 1026           | CDKN1A      | cyclin-dependent kinase inhibitor 1A (p21, Cip1)                                             |                         |                                |                        |                     |
| 6921           | TCEB1       | transcription elongation factor B (SIII), polypeptide 1 (15kDa, elongin C)                   |                         |                                |                        |                     |
| 8453           | CUL2        | cullin 2                                                                                     |                         |                                |                        |                     |
| 7704           | ZBTB16      | zinc finger and BTB domain containing 16                                                     |                         |                                |                        |                     |
| 5601           | MAPK9       | mitogen-activated protein kinase 9                                                           |                         |                                |                        |                     |
| 4791           | NFKB2       | nuclear factor of kappa light polypeptide gene enhancer in B-cells 2 (p49/p100)              |                         |                                |                        |                     |
| 6776           | STAT5A      | signal transducer and activator of transcription 5A                                          |                         |                                |                        |                     |
| 6777           | STAT5B      | signal transducer and activator of transcription 5B                                          |                         |                                |                        |                     |
| 6774           | STAT3       | signal transducer and activator of transcription 3 (acute-phase response factor)             |                         |                                |                        |                     |
| 598            | BCL2L1      | BCL2-like 1                                                                                  |                         |                                |                        |                     |
| 5371           | PML         | promyelocytic leukemia                                                                       |                         |                                |                        |                     |
| 7184           | HSP90B1     | heat shock protein 90kDa beta (Grp94), member 1                                              |                         |                                |                        |                     |
| 7157           | TP53        | tumor protein p53                                                                            |                         |                                |                        |                     |
| 5578           | PRKCA       | protein kinase C, alpha                                                                      |                         |                                |                        |                     |
| 7042           | TGFBR2      | transforming growth factor, beta 2                                                           |                         |                                |                        |                     |
| 7043           | TGFBR3      | transforming growth factor, beta 3                                                           |                         |                                |                        |                     |
| 7422           | VEGFA       | vascular endothelial growth factor A                                                         |                         |                                |                        |                     |
| 7424           | VEGFC       | vascular endothelial growth factor C                                                         |                         |                                |                        |                     |
| 4609           | MYC         | v-myc myelocytomatosis viral oncogene homolog (avian)                                        |                         |                                |                        |                     |
| 5156           | PDGFRA      | platelet-derived growth factor receptor, alpha polypeptide                                   |                         |                                |                        |                     |
| 8074           | FGF23       | fibroblast growth factor 23                                                                  |                         |                                |                        |                     |
| 8817           | FGF18       | fibroblast growth factor 18                                                                  |                         |                                |                        |                     |
| 2256           | FGF11       | fibroblast growth factor 11                                                                  |                         |                                |                        |                     |
| 2257           | FGF12       | fibroblast growth factor 12                                                                  |                         |                                |                        |                     |

|          |         |                                                                                                                                             |                                |                        |                     |
|----------|---------|---------------------------------------------------------------------------------------------------------------------------------------------|--------------------------------|------------------------|---------------------|
| 2735     | GLI1    | GLI family zinc finger 1                                                                                                                    | KEGG_PATHWAYS_IN_CANCER        |                        |                     |
| 2737     | GLI3    | GLI family zinc finger 3                                                                                                                    | KEGG_PATHWAYS_IN_CANCER        |                        |                     |
| 3913     | LAMB2   | laminin, beta 2 (laminin 5)                                                                                                                 | KEGG_PATHWAYS_IN_CANCER        |                        |                     |
| 1870     | E2F2    | E2F transcription factor 2                                                                                                                  | KEGG_PATHWAYS_IN_CANCER        |                        |                     |
| 1029     | CDKN2A  | cyclin-dependent kinase inhibitor 2A (melanoma, p16, inhibits CDK4)                                                                         | KEGG_PATHWAYS_IN_CANCER        |                        |                     |
| 23624    | CBL     | Cas-Br-M (murine) ecotropic retroviral transforming sequence c                                                                              | KEGG_PATHWAYS_IN_CANCER        |                        |                     |
| 861      | RUNX1   | runx-related transcription factor 1                                                                                                         | KEGG_PATHWAYS_IN_CANCER        |                        |                     |
| 1496     | CTNNA2  | catenin (cadherin-associated protein), alpha 2                                                                                              | KEGG_PATHWAYS_IN_CANCER        |                        |                     |
| 2113     | ETS1    | v-ets erythroblastosis virus E26 oncogene homolog 1 (avian)                                                                                 | KEGG_PATHWAYS_IN_CANCER        |                        |                     |
| 5743     | PTGS2   | prostaglandin-endoperoxide synthase 2 (prostaglandin G/H synthase and cyclooxygenase)                                                       | KEGG_PATHWAYS_IN_CANCER        |                        |                     |
| 7170     | TPM3    | tropomyosin 3                                                                                                                               | KEGG_PATHWAYS_IN_CANCER        |                        |                     |
| 5888     | RAD51   | RAD51 homolog (S. cerevisiae)                                                                                                               | KEGG_PATHWAYS_IN_CANCER        |                        |                     |
| 405      | ARNT    | aryl hydrocarbon receptor nuclear translocator                                                                                              | KEGG_PATHWAYS_IN_CANCER        |                        |                     |
| 11186    | RASSF1  | Ras association (RalGDS/AF-6) domain family member 1                                                                                        | KEGG_PATHWAYS_IN_CANCER        |                        |                     |
| 862      | RUNX1T1 | runx-related transcription factor 1; translocated to, 1 (cyclin D-related)                                                                  | KEGG_PATHWAYS_IN_CANCER        |                        |                     |
| 9618     | TRAF4   | TNF receptor-associated factor 4                                                                                                            | KEGG_PATHWAYS_IN_CANCER        |                        |                     |
| 2534     | FYN     | FYN oncogene related to SRC, FGR, YES                                                                                                       | REACTOME_DEVELOPMENTAL_BIOLOGY | REACTOME_IMMUNE_SYSTEM | REACTOME_HEMOSTASIS |
| 1432     | MAPK14  | mitogen-activated protein kinase 14                                                                                                         | REACTOME_DEVELOPMENTAL_BIOLOGY | REACTOME_IMMUNE_SYSTEM | REACTOME_HEMOSTASIS |
| 1385     | CREB1   | cAMP responsive element binding protein 1                                                                                                   | REACTOME_DEVELOPMENTAL_BIOLOGY | REACTOME_IMMUNE_SYSTEM | REACTOME_HEMOSTASIS |
| 1173     | AP2M1   | adaptor-related protein complex 2, mu 1 subunit                                                                                             | REACTOME_DEVELOPMENTAL_BIOLOGY | REACTOME_IMMUNE_SYSTEM | REACTOME_HEMOSTASIS |
| 163      | AP2B1   | adaptor-related protein complex 2, beta 1 subunit                                                                                           | REACTOME_DEVELOPMENTAL_BIOLOGY | REACTOME_IMMUNE_SYSTEM | REACTOME_HEMOSTASIS |
| 55740    | ENAH    | enabled homolog (Drosophila)                                                                                                                | REACTOME_DEVELOPMENTAL_BIOLOGY | REACTOME_IMMUNE_SYSTEM | REACTOME_HEMOSTASIS |
| 9252     | RP56KA5 | ribosomal protein S6 kinase, 90kDa, polypeptide 5                                                                                           | REACTOME_DEVELOPMENTAL_BIOLOGY | REACTOME_IMMUNE_SYSTEM | REACTOME_HEMOSTASIS |
| 1277     | COL1A1  | collagen, type I, alpha 1                                                                                                                   | REACTOME_DEVELOPMENTAL_BIOLOGY | REACTOME_IMMUNE_SYSTEM | REACTOME_HEMOSTASIS |
| 7084     | TNFI    | tnfrsf1                                                                                                                                     | REACTOME_DEVELOPMENTAL_BIOLOGY | REACTOME_IMMUNE_SYSTEM | REACTOME_HEMOSTASIS |
| 1072     | CFL1    | cofilin 1 (non-muscle)                                                                                                                      | REACTOME_DEVELOPMENTAL_BIOLOGY | REACTOME_IMMUNE_SYSTEM | REACTOME_HEMOSTASIS |
| 57113    | TRPC7   | transient receptor potential cation channel, subfamily C, member 7                                                                          | REACTOME_DEVELOPMENTAL_BIOLOGY | REACTOME_IMMUNE_SYSTEM | REACTOME_HEMOSTASIS |
| 783      | CACNB2  | calcium channel, voltage-dependent, beta 2 subunit                                                                                          | REACTOME_DEVELOPMENTAL_BIOLOGY | REACTOME_IMMUNE_SYSTEM | REACTOME_HEMOSTASIS |
| 784      | CACNB3  | calcium channel, voltage-dependent, beta 3 subunit                                                                                          | REACTOME_DEVELOPMENTAL_BIOLOGY | REACTOME_IMMUNE_SYSTEM | REACTOME_HEMOSTASIS |
| 8913     | CACNA1G | calcium channel, voltage-dependent, T type, alpha 1G subunit                                                                                | REACTOME_DEVELOPMENTAL_BIOLOGY | REACTOME_IMMUNE_SYSTEM | REACTOME_HEMOSTASIS |
| 8912     | CACNA1H | calcium channel, voltage-dependent, T type, alpha 1H subunit                                                                                | REACTOME_DEVELOPMENTAL_BIOLOGY | REACTOME_IMMUNE_SYSTEM | REACTOME_HEMOSTASIS |
| 6093     | ROCK1   | Rho-associated, coiled-coil containing protein kinase 1                                                                                     | REACTOME_DEVELOPMENTAL_BIOLOGY | REACTOME_IMMUNE_SYSTEM | REACTOME_HEMOSTASIS |
| 1280     | COL2A1  | collagen, type II, alpha 1                                                                                                                  | REACTOME_DEVELOPMENTAL_BIOLOGY | REACTOME_IMMUNE_SYSTEM | REACTOME_HEMOSTASIS |
| 1290     | COL5A2  | collagen, type V, alpha 2                                                                                                                   | REACTOME_DEVELOPMENTAL_BIOLOGY | REACTOME_IMMUNE_SYSTEM | REACTOME_HEMOSTASIS |
| 10154    | PLXNC1  | plexin C1                                                                                                                                   | REACTOME_DEVELOPMENTAL_BIOLOGY | REACTOME_IMMUNE_SYSTEM | REACTOME_HEMOSTASIS |
| 57556    | SEMA6A  | sema domain, transmembrane domain (TM), and cytoplasmic domain, (semaphorin) 6A                                                             | REACTOME_DEVELOPMENTAL_BIOLOGY | REACTOME_IMMUNE_SYSTEM | REACTOME_HEMOSTASIS |
| 9037     | SEMA5A  | sema domain, seven thrombospondin repeats (type 1 and type 1-like), transmembrane domain (TM) and short cytoplasmic domain, (semaphorin) 5A | REACTOME_DEVELOPMENTAL_BIOLOGY | REACTOME_IMMUNE_SYSTEM | REACTOME_HEMOSTASIS |
| 10371    | SEMA3A  | sema domain, immunoglobulin domain (Ig), short basic domain, secreted, (semaphorin) 3A                                                      | REACTOME_DEVELOPMENTAL_BIOLOGY | REACTOME_IMMUNE_SYSTEM | REACTOME_HEMOSTASIS |
| 9423     | NTN1    | netrin 1                                                                                                                                    | REACTOME_DEVELOPMENTAL_BIOLOGY | REACTOME_IMMUNE_SYSTEM | REACTOME_HEMOSTASIS |
| 3984     | LIMK1   | LIM domain kinase 1                                                                                                                         | REACTOME_DEVELOPMENTAL_BIOLOGY | REACTOME_IMMUNE_SYSTEM | REACTOME_HEMOSTASIS |
| 6091     | ROBO1   | roundabout, axon guidance receptor, homolog 1 (Drosophila)                                                                                  | REACTOME_DEVELOPMENTAL_BIOLOGY | REACTOME_IMMUNE_SYSTEM | REACTOME_HEMOSTASIS |
| 8829     | NRP1    | neuropilin 1                                                                                                                                | REACTOME_DEVELOPMENTAL_BIOLOGY | REACTOME_IMMUNE_SYSTEM | REACTOME_HEMOSTASIS |
| 23380    | SRGAP2  | SLIT-ROBO Rho GTPase activating protein 2                                                                                                   | REACTOME_DEVELOPMENTAL_BIOLOGY | REACTOME_IMMUNE_SYSTEM | REACTOME_HEMOSTASIS |
| 9901     | SRGAP3  | SLIT-ROBO Rho GTPase activating protein 3                                                                                                   | REACTOME_DEVELOPMENTAL_BIOLOGY | REACTOME_IMMUNE_SYSTEM | REACTOME_HEMOSTASIS |
| 8633     | UNC5C   | unc-5 homolog C (C. elegans)                                                                                                                | REACTOME_DEVELOPMENTAL_BIOLOGY | REACTOME_IMMUNE_SYSTEM | REACTOME_HEMOSTASIS |
| 23129    | PLXND1  | plexin D1                                                                                                                                   | REACTOME_DEVELOPMENTAL_BIOLOGY | REACTOME_IMMUNE_SYSTEM | REACTOME_HEMOSTASIS |
| 7204     | TRIO    | triple functional domain (PTPRF interacting)                                                                                                | REACTOME_DEVELOPMENTAL_BIOLOGY | REACTOME_IMMUNE_SYSTEM | REACTOME_HEMOSTASIS |
| 23332    | CIASP1  | cytoplasmic linker associated protein 1                                                                                                     | REACTOME_DEVELOPMENTAL_BIOLOGY | REACTOME_IMMUNE_SYSTEM | REACTOME_HEMOSTASIS |
| 389      | RHO     | ras homolog gene family, member C                                                                                                           | REACTOME_DEVELOPMENTAL_BIOLOGY | REACTOME_IMMUNE_SYSTEM | REACTOME_HEMOSTASIS |
| 2675     | GFR     | GDNF family receptor alpha 2                                                                                                                | REACTOME_DEVELOPMENTAL_BIOLOGY | REACTOME_IMMUNE_SYSTEM | REACTOME_HEMOSTASIS |
| 8650     | NUMB    | numb homolog (Drosophila)                                                                                                                   | REACTOME_DEVELOPMENTAL_BIOLOGY | REACTOME_IMMUNE_SYSTEM | REACTOME_HEMOSTASIS |
| 8828     | NRP2    | neuropilin 2                                                                                                                                | REACTOME_DEVELOPMENTAL_BIOLOGY | REACTOME_IMMUNE_SYSTEM | REACTOME_HEMOSTASIS |
| 10963    | STIP1   | stress-induced-phosphoprotein 1                                                                                                             | REACTOME_DEVELOPMENTAL_BIOLOGY | REACTOME_IMMUNE_SYSTEM | REACTOME_HEMOSTASIS |
| 214      | ALCAM   | activated leukocyte cell adhesion molecule                                                                                                  | REACTOME_DEVELOPMENTAL_BIOLOGY | REACTOME_IMMUNE_SYSTEM | REACTOME_HEMOSTASIS |
| 8506     | CNTNAP1 | contactin associated protein 1                                                                                                              | REACTOME_DEVELOPMENTAL_BIOLOGY | REACTOME_IMMUNE_SYSTEM | REACTOME_HEMOSTASIS |
| 286      | ANK1    | ankyrin 1, erythrocytic                                                                                                                     | REACTOME_DEVELOPMENTAL_BIOLOGY | REACTOME_IMMUNE_SYSTEM | REACTOME_HEMOSTASIS |
| 6334     | SCN8A   | sodium channel, voltage gated, type VIII, alpha subunit                                                                                     | REACTOME_DEVELOPMENTAL_BIOLOGY | REACTOME_IMMUNE_SYSTEM | REACTOME_HEMOSTASIS |
| 10013941 | CD24    | CD24 molecule                                                                                                                               | REACTOME_DEVELOPMENTAL_BIOLOGY | REACTOME_IMMUNE_SYSTEM | REACTOME_HEMOSTASIS |
| 4651     | MYO10   | myosin X                                                                                                                                    | REACTOME_DEVELOPMENTAL_BIOLOGY | REACTOME_IMMUNE_SYSTEM | REACTOME_HEMOSTASIS |
| 6478     | SIAH2   | seven in absentia homolog 2 (Drosophila)                                                                                                    | REACTOME_DEVELOPMENTAL_BIOLOGY | REACTOME_IMMUNE_SYSTEM | REACTOME_HEMOSTASIS |
| 896      | CND3    | cyclin D3                                                                                                                                   | REACTOME_DEVELOPMENTAL_BIOLOGY | REACTOME_IMMUNE_SYSTEM | REACTOME_HEMOSTASIS |
| 51129    | ANGPTL4 | angiopoietin-like 4                                                                                                                         | REACTOME_DEVELOPMENTAL_BIOLOGY | REACTOME_IMMUNE_SYSTEM | REACTOME_HEMOSTASIS |
| 4838     | NODAL   | nodal homolog (mouse)                                                                                                                       | REACTOME_DEVELOPMENTAL_BIOLOGY | REACTOME_IMMUNE_SYSTEM | REACTOME_HEMOSTASIS |
| 9370     | ADIPOQ  | adiponectin, C1Q and collagen domain containing                                                                                             | REACTOME_DEVELOPMENTAL_BIOLOGY | REACTOME_IMMUNE_SYSTEM | REACTOME_HEMOSTASIS |
| 5469     | MED1    | mediator complex subunit 1                                                                                                                  | REACTOME_DEVELOPMENTAL_BIOLOGY | REACTOME_IMMUNE_SYSTEM | REACTOME_HEMOSTASIS |
| 6604     | SMARCD3 | SWI/SNF related, matrix associated, actin dependent regulator of chromatin, subfamily d, member 3                                           | REACTOME_DEVELOPMENTAL_BIOLOGY | REACTOME_IMMUNE_SYSTEM | REACTOME_HEMOSTASIS |
| 9477     | MED20   | mediator complex subunit 20                                                                                                                 | REACTOME_DEVELOPMENTAL_BIOLOGY | REACTOME_IMMUNE_SYSTEM | REACTOME_HEMOSTASIS |
| 9862     | MED24   | mediator complex subunit 24                                                                                                                 | REACTOME_DEVELOPMENTAL_BIOLOGY | REACTOME_IMMUNE_SYSTEM | REACTOME_HEMOSTASIS |
| 55588    | MED29   | mediator complex subunit 29                                                                                                                 | REACTOME_DEVELOPMENTAL_BIOLOGY | REACTOME_IMMUNE_SYSTEM | REACTOME_HEMOSTASIS |
| 9412     | MED21   | mediator complex subunit 21                                                                                                                 | REACTOME_DEVELOPMENTAL_BIOLOGY | REACTOME_IMMUNE_SYSTEM | REACTOME_HEMOSTASIS |
| 5080     | PAX6    | paired box 6                                                                                                                                | REACTOME_DEVELOPMENTAL_BIOLOGY | REACTOME_IMMUNE_SYSTEM | REACTOME_HEMOSTASIS |
| 4209     | MEF2D   | myocyte enhancer factor 2D                                                                                                                  | REACTOME_DEVELOPMENTAL_BIOLOGY | REACTOME_IMMUNE_SYSTEM | REACTOME_HEMOSTASIS |
| 6280     | HELI    | hairly and enhancer of split 1, (Drosophila)                                                                                                | REACTOME_DEVELOPMENTAL_BIOLOGY | REACTOME_IMMUNE_SYSTEM | REACTOME_HEMOSTASIS |
| 6157     | SLC24A4 | solute carrier family 2 (facilitated glucose transporter), member 4                                                                         | REACTOME_DEVELOPMENTAL_BIOLOGY | REACTOME_IMMUNE_SYSTEM | REACTOME_HEMOSTASIS |
| 6925     | TCF4    | transcription factor 4                                                                                                                      | REACTOME_DEVELOPMENTAL_BIOLOGY | REACTOME_IMMUNE_SYSTEM | REACTOME_HEMOSTASIS |
| 3516     | RBP1    | recombination signal binding protein for immunoglobulin kappa J region                                                                      | REACTOME_DEVELOPMENTAL_BIOLOGY | REACTOME_IMMUNE_SYSTEM | REACTOME_HEMOSTASIS |
| 6929     | TCF3    | transcription factor 3 (E2A immunoglobulin enhancer binding factors E12/E47)                                                                | REACTOME_DEVELOPMENTAL_BIOLOGY | REACTOME_IMMUNE_SYSTEM | REACTOME_HEMOSTASIS |
| 7026     | NR2F2   | nuclear receptor subfamily 2, group F, member 2                                                                                             | REACTOME_DEVELOPMENTAL_BIOLOGY | REACTOME_IMMUNE_SYSTEM | REACTOME_HEMOSTASIS |
| 3651     | PDX1    | pancreatic and duodenal homeobox 1                                                                                                          | REACTOME_DEVELOPMENTAL_BIOLOGY | REACTOME_IMMUNE_SYSTEM | REACTOME_HEMOSTASIS |
| 3175     | ONECUT1 | one cut homeobox 1                                                                                                                          | REACTOME_DEVELOPMENTAL_BIOLOGY | REACTOME_IMMUNE_SYSTEM | REACTOME_HEMOSTASIS |
| 5516     | PPP2R8  | protein phosphatase 2, catalytic subunit, beta isozyme                                                                                      | REACTOME_DEVELOPMENTAL_BIOLOGY | REACTOME_IMMUNE_SYSTEM | REACTOME_HEMOSTASIS |
| 5526     | PPP2R5B | protein phosphatase 2, regulatory subunit B', beta                                                                                          | REACTOME_DEVELOPMENTAL_BIOLOGY | REACTOME_IMMUNE_SYSTEM | REACTOME_HEMOSTASIS |
| 5527     | PPP2R5C | protein phosphatase 2, regulatory subunit B', gamma                                                                                         | REACTOME_DEVELOPMENTAL_BIOLOGY | REACTOME_IMMUNE_SYSTEM | REACTOME_HEMOSTASIS |
| 6464     | SHC1    | SHC (Src homology 2 domain containing) transforming protein 1                                                                               | REACTOME_DEVELOPMENTAL_BIOLOGY | REACTOME_IMMUNE_SYSTEM | REACTOME_HEMOSTASIS |
| 7534     | YWHAZ   | tyrosine 3-monooxygenase/tryptophan 5-monooxygenase activation protein, zeta polypeptide                                                    | REACTOME_DEVELOPMENTAL_BIOLOGY | REACTOME_IMMUNE_SYSTEM | REACTOME_HEMOSTASIS |
| 7525     | YES1    | v-yes-1 Yamaguchi sarcoma viral oncogene homolog 1                                                                                          | REACTOME_DEVELOPMENTAL_BIOLOGY | REACTOME_IMMUNE_SYSTEM | REACTOME_HEMOSTASIS |
| 3309     | HSPA5   | heat shock 70kDa protein 5 (glucose-regulated protein, 78kDa)                                                                               | REACTOME_DEVELOPMENTAL_BIOLOGY | REACTOME_IMMUNE_SYSTEM | REACTOME_HEMOSTASIS |
| 3709     | ITPR2   | inositol 1,4,5-trisphosphate receptor, type 2                                                                                               | REACTOME_DEVELOPMENTAL_BIOLOGY | REACTOME_IMMUNE_SYSTEM | REACTOME_HEMOSTASIS |
| 10411    | RAPGEF3 | Rap guanine nucleotide exchange factor (GEF) 3                                                                                              | REACTOME_DEVELOPMENTAL_BIOLOGY | REACTOME_IMMUNE_SYSTEM | REACTOME_HEMOSTASIS |
| 5777     | PTPN6   | protein tyrosine phosphatase, non-receptor type 6                                                                                           | REACTOME_DEVELOPMENTAL_BIOLOGY | REACTOME_IMMUNE_SYSTEM | REACTOME_HEMOSTASIS |
| 3796     | KIF2A   | kinesin heavy chain member 2A                                                                                                               | REACTOME_DEVELOPMENTAL_BIOLOGY | REACTOME_IMMUNE_SYSTEM | REACTOME_HEMOSTASIS |
| 5592     | PRKG1   | protein kinase, cGMP-dependent, type I                                                                                                      | REACTOME_DEVELOPMENTAL_BIOLOGY | REACTOME_IMMUNE_SYSTEM | REACTOME_HEMOSTASIS |
| 3831     | KLC1    | kinesin light chain 1                                                                                                                       | REACTOME_DEVELOPMENTAL_BIOLOGY | REACTOME_IMMUNE_SYSTEM | REACTOME_HEMOSTASIS |
| 3832     | KIF11   | kinesin family member 11                                                                                                                    | REACTOME_DEVELOPMENTAL_BIOLOGY | REACTOME_IMMUNE_SYSTEM | REACTOME_HEMOSTASIS |
| 5770     | PTPN1   | protein tyrosine phosphatase, non-receptor type 1                                                                                           | REACTOME_DEVELOPMENTAL_BIOLOGY | REACTOME_IMMUNE_SYSTEM | REACTOME_HEMOSTASIS |
| 3717     | JAK2    | Janus kinase 2                                                                                                                              | REACTOME_DEVELOPMENTAL_BIOLOGY | REACTOME_IMMUNE_SYSTEM | REACTOME_HEMOSTASIS |
| 351      | APP     | amyloid beta (A4) precursor protein                                                                                                         | REACTOME_DEVELOPMENTAL_BIOLOGY | REACTOME_IMMUNE_SYSTEM | REACTOME_HEMOSTASIS |
| 3659     | IRF1    | interferon regulatory factor 1                                                                                                              | REACTOME_DEVELOPMENTAL_BIOLOGY | REACTOME_IMMUNE_SYSTEM | REACTOME_HEMOSTASIS |
| 6885     | MAP3K7  | mitogen-activated protein kinase kinase kinase 7                                                                                            | REACTOME_DEVELOPMENTAL_BIOLOGY | REACTOME_IMMUNE_SYSTEM | REACTOME_HEMOSTASIS |
| 9020     | MAP3K14 | mitogen-activated protein kinase kinase kinase 14                                                                                           | REACTOME_DEVELOPMENTAL_BIOLOGY | REACTOME_IMMUNE_SYSTEM | REACTOME_HEMOSTASIS |
| 8945     | BTRC    | beta-transducin repeat containing                                                                                                           | REACTOME_DEVELOPMENTAL_BIOLOGY | REACTOME_IMMUNE_SYSTEM | REACTOME_HEMOSTASIS |
| 3693     | ITGB5   | integrin, beta 5                                                                                                                            | REACTOME_DEVELOPMENTAL_BIOLOGY | REACTOME_IMMUNE_SYSTEM | REACTOME_HEMOSTASIS |
| 1508     | CTS8    | cathepsin B                                                                                                                                 | REACTOME_DEVELOPMENTAL_BIOLOGY | REACTOME_IMMUNE_SYSTEM | REACTOME_HEMOSTASIS |
| 57761    | TRIB3   | tribbles homolog 3 (Drosophila)                                                                                                             | REACTOME_DEVELOPMENTAL_BIOLOGY | REACTOME_IMMUNE_SYSTEM | REACTOME_HEMOSTASIS |
| 9021     | Socs3   | suppressor of cytokine signaling 3                                                                                                          | REACTOME_DEVELOPMENTAL_BIOLOGY | REACTOME_IMMUNE_SYSTEM | REACTOME_HEMOSTASIS |
| 2209     | FCGR1A  | Fc fragment of IgG, high affinity Ia, receptor (CD64)                                                                                       | REACTOME_DEVELOPMENTAL_BIOLOGY | REACTOME_IMMUNE_SYSTEM | REACTOME_HEMOSTASIS |
| 51434    | ANAPC7  | anaphase promoting complex subunit 7                                                                                                        | REACTOME_DEVELOPMENTAL_BIOLOGY | REACTOME_IMMUNE_SYSTEM | REACTOME_HEMOSTASIS |
| 996      | CDC27   | cell division cycle 27 homolog (S. cerevisiae)                                                                                              | REACTOME_DEVELOPMENTAL_BIOLOGY | REACTOME_IMMUNE_SYSTEM | REACTOME_HEMOSTASIS |
| 5682     | PSMA1   | proteasome (prosome, macropain) subunit, alpha type, 1                                                                                      | REACTOME_DEVELOPMENTAL_BIOLOGY | REACTOME_IMMUNE_SYSTEM | REACTOME_HEMOSTASIS |
| 5686     | PSMA5   | proteasome (prosome, macropain) subunit, alpha type, 5                                                                                      | REACTOME_DEVELOPMENTAL_BIOLOGY | REACTOME_IMMUNE_SYSTEM | REACTOME_HEMOSTASIS |
| 5695     | PSMB7   | proteasome (prosome, macropain) subunit, beta type, 7                                                                                       | REACTOME_DEVELOPMENTAL_BIOLOGY | REACTOME_IMMUNE_SYSTEM | REACTOME_HEMOSTASIS |
| 5717     | PSMD11  | proteasome (prosome, macropain) 26S subunit, non-ATPase, 11                                                                                 | REACTOME_DEVELOPMENTAL_BIOLOGY | REACTOME_IMMUNE_SYSTEM | REACTOME_HEMOSTASIS |
| 5699     | PSMB10  | proteasome (prosome, macropain) subunit, beta type, 10                                                                                      | REACTOME_DEVELOPMENTAL_BIOLOGY | REACTOME_IMMUNE_SYSTEM | REACTOME_HEMOSTASIS |
| 5705     | PSMCS   | proteasome (prosome, macropain) 26S subunit, ATPase, 5                                                                                      | REACTOME_DEVELOPMENTAL_BIOLOGY | REACTOME_IMMUNE_SYSTEM | REACTOME_HEMOSTASIS |
| 5713     | PSMD7   | proteasome (prosome, macropain) 26S subunit, non-ATPase, 7                                                                                  | REACTOME_DEVELOPMENTAL_BIOLOGY | REACTOME_IMMUNE_SYSTEM | REACTOME_HEMOSTASIS |
| 9491     | PSMF1   | proteasome (prosome, macropain) inhibitor subunit 1 (PI31)                                                                                  | REACTOME_DEVELOPMENTAL_BIOLOGY | REACTOME_IMMUNE_SYSTEM | REACTOME_HEMOSTASIS |
| 26272    | FBX04   | F-box protein 4                                                                                                                             | REACTOME_DEVELOPMENTAL_BIOLOGY | REACTOME_IMMUNE_SYSTEM | REACTOME_HEMOSTASIS |
| 7323     | UBE2D3  | ubiquitin-conjugating enzyme E2D 3                                                                                                          | REACTOME_DEVELOPMENTAL_BIOLOGY | REACTOME_IMMUNE_SYSTEM | REACTOME_HEMOSTASIS |
| 9817     | KEAP1   | kelch-like ECH-associated protein 1                                                                                                         | REACTOME_DEVELOPMENTAL_BIOLOGY | REACTOME_IMMUNE_SYSTEM | REACTOME_HEMOSTASIS |
| 7327     | UBE2G2  | ubiquitin-conjugating enzyme E2G 2                                                                                                          | REACTOME_DEVELOPMENTAL_BIOLOGY | REACTOME_IMMUNE_SYSTEM | REACTOME_HEMOSTASIS |
| 7325     | UBE2E2  | ubiquitin-conjugating enzyme E2E 2                                                                                                          | REACTOME_DEVELOPMENTAL_BIOLOGY | REACTOME_IMMUNE_SYSTEM | REACTOME_HEMOSTASIS |
| 26232    | FBX02   | F-box protein 2                                                                                                                             | REACTOME_DEVELOPMENTAL_BIOLOGY | REACTOME_IMMUNE_SYSTEM | REACTOME_HEMOSTASIS |
| 26259    | FBXW8   | F-box and WD repeat domain containing 8                                                                                                     | REACTOME_DEVELOPMENTAL_BIOLOGY | REACTOME_IMMUNE_SYSTEM | REACTOME_HEMOSTASIS |
| 8924     | HERC2   | hect domain and RLD 2                                                                                                                       | REACTOME_DEVELOPMENTAL_BIOLOGY | REACTOME_IMMUNE_SYSTEM | REACTOME_HEMOSTASIS |
| 255488   | RNF144B | ring finger protein 144B                                                                                                                    | REACTOME_DEVELOPMENTAL_BIOLOGY | REACTOME_IMMUNE_SYSTEM | REACTOME_HEMOSTASIS |
| 26270    | FBX06   | F-box protein 6                                                                                                                             | REACTOME_DEVELOPMENTAL_BIOLOGY | REACTOME_IMMUNE_SYSTEM | REACTOME_HEMOSTASIS |
| 27252    | KLHL20  | kelch-like 20 (Drosophila)                                                                                                                  | REACTOME_DEVELOPMENTAL_BIOLOGY | REACTOME_IMMUNE_SYSTEM | REACTOME_HEMOSTASIS |
| 7174     | TPP2    | tripeptidyl peptidase II                                                                                                                    | REACTOME_DEVELOPMENTAL_BIOLOGY | REACTOME_IMMUNE_SYSTEM | REACTOME_HEMOSTASIS |
| 80176    | SPSB1   | splA/ryanodine receptor domain and SOCS box containing 1                                                                                    | REACTOME_DEVELOPMENTAL_BIOLOGY | REACTOME_IMMUNE_SYSTEM | REACTOME_HEMOSTASIS |
| 9520     | NPEPPS  | aminopeptidase puromycin sensitive                                                                                                          | REACTOME_DEVELOPMENTAL_BIOLOGY | REACTOME_IMMUNE_SYSTEM | REACTOME_HEMOSTASIS |
| 811      | CALR    | calreticulin                                                                                                                                | REACTOME_DEVELOPMENTAL_BIOLOGY | REACTOME_IMMUNE_SYSTEM | REACTOME_HEMOSTASIS |
| 2923     | PDIA3   | protein disulfide isomerase family A, member 3                                                                                              | REACTOME_DEVELOPMENTAL_BIOLOGY | REACTOME_IMMUNE_SYSTEM | REACTOME_HEMOSTASIS |
| 6890     | TAP1    | transporter 1, ATP-binding cassette, sub-family B (MDR/TAP)                                                                                 | REACTOME_DEVELOPMENTAL_BIOLOGY | REACTOME_IMMUNE_SYSTEM | REACTOME_HEMOSTASIS |
| 9902     | MRC2    | mannose receptor, C type 2                                                                                                                  | REACTOME_DEVELOPMENTAL_BIOLOGY | REACTOME_IMMUNE_SYSTEM | REACTOME_HEMOSTASIS |
| 821      | CANX    | calnexin                                                                                                                                    | REACTOME_DEVELOPMENTAL_BIOLOGY | REACTOME_IMMUNE_SYSTEM | REACTOME_HEMOSTASIS |
| 79109    | MAPKAP1 | mitogen-activated protein kinase associated protein 1                                                                                       | REACTOME_DEVELOPMENTAL_BIOLOGY | REACTOME_IMMUNE_SYSTEM | REACTOME_HEMOSTASIS |
| 4303     | FOXO4   | forkhead box O4                                                                                                                             | REACTOME_DEVELOPMENTAL_BIOLOGY | REACTOME_IMMUNE_SYSTEM | REACTOME_HEMOSTASIS |
| 3384     | ICAM2   | intercellular adhesion molecule 2                                                                                                           | REACTOME_DEVELOPMENTAL_BIOLOGY | REACTOME_IMMUNE_SYSTEM | REACTOME_HEMOSTASIS |
| 3386     | ICAM4   | intercellular adhesion molecule 4 (Landsteiner-Wiener blood group)                                                                          | REACTOME_DEVELOPMENTAL_BIOLOGY | REACTOME_IMMUNE_SYSTEM | REACTOME_HEMOSTASIS |
| 164      | AP1G1   | adaptor-related protein complex 1, gamma 1 subunit                                                                                          | REACTOME_DEVELOPMENTAL_BIOLOGY | REACTOME_IMMUNE_SYSTEM | REACTOME_HEMOSTASIS |
| 941      | CD80    | CD80 molecule                                                                                                                               | REACTOME_DEVELOPMENTAL_BIOLOGY | REACTOME_IMMUNE_SYSTEM | REACTOME_HEMOSTASIS |
| 718      | C3      | complement component 3                                                                                                                      | REACTOME_DEVELOPMENTAL_BIOLOGY | REACTOME_IMMUNE_SYSTEM | REACTOME_HEMOSTASIS |
| 23308    | ICOSLG  | inducible T-cell co-stimulator ligand                                                                                                       | REACTOME_DEVELOPMENTAL_BIOLOGY | REACTOME_IMMUNE_SYSTEM | REACTOME_HEMOSTASIS |
| 114876   | OSBPL1A | oxysterol binding protein-like 1A                                                                                                           | REACTOME_DEVELOPMENTAL_BIOLOGY | REACTOME_IMMUNE_SYSTEM | REACTOME_HEMOSTASIS |
| 5609     | MAP2K7  | mitogen-activated protein kinase kinase 7                                                                                                   | REACTOME_DEVELOPMENTAL_BIOLOGY | REACTOME_IMMUNE_SYSTEM | REACTOME_HEMOSTASIS |
| 929      | CD14    | CD14 molecule                                                                                                                               | REACTOME_DEVELOPMENTAL_BIOLOGY | REACTOME_IMMUNE_SYSTEM | REACTOME_HEMOSTASIS |
| 1845     | DUSP3   | dual specificity phosphatase 3                                                                                                              | REACTOME_DEVELOPMENTAL_BIOLOGY | REACTOME_IMMUNE_SYSTEM | REACTOME_HEMOSTASIS |
| 4215     | MAP3K3  | mitogen-activated protein kinase kinase kinase 3                                                                                            | REACTOME_DEVELOPMENTAL_BIOLOGY | REACTOME_IMMUNE_SYSTEM | REACTOME_HEMOSTASIS |
| 3554     | IL1R1   | interleukin 1 receptor, type 1                                                                                                              | REACTOME_DEVELOPMENTAL_BIOLOGY | REACTOME_IMMUNE_SYSTEM | REACTOME_HEMOSTASIS |
| 1386     | ATF2    | activating transcription factor 2                                                                                                           | REACTOME_DEVELOPMENTAL_BIOLOGY | REACTOME_IMMUNE_SYSTEM | REACTOME_HEMOSTASIS |
| 817      | CAMK2D  | calcium/calmodulin-dependent protein kinase II delta                                                                                        | REACTOME_DEVELOPMENTAL_BIOLOGY | REACTOME_IMMUNE_SYSTEM | REACTOME_HEMOSTASIS |
| 6285     | S100B   | S100 calcium binding protein B                                                                                                              | REACTOME_DEVELOPMENTAL_BIOLOGY | REACTOME_IMMUNE_SYSTEM | REACTOME_HEMOSTASIS |
| 713      | C1QB    | complement component 1, q subcomponent, B chain                                                                                             | REACTOME_DEVELOPMENTAL_BIOLOGY | REACTOME_IMMUNE_SYSTEM | REACTOME_HEMOSTASIS |
| 714      | C1QC    | complement component 1, q subcomponent, C chain                                                                                             | REACTOME_DEVELOPMENTAL_BIOLOGY | REACTOME_IMMUNE_SYSTEM | REACTOME_HEMOSTASIS |
| 8878     | SQSTM1  | sequestosome 1                                                                                                                              | REACTOME_DEVELOPMENTAL_BIOLOGY | REACTOME_IMMUNE_SYSTEM | REACTOME_HEMOSTASIS |
| 81929    | SEH1L   | SEH1-like (S. cerevisiae)                                                                                                                   | REACTOME_DEVELOPMENTAL_BIOLOGY | REACTOME_IMMUNE_SYSTEM | REACTOME_HEMOSTASIS |
| 3556     | IL1RAP  | interleukin 1 receptor accessory protein                                                                                                    | REACTOME_DEVELOPMENTAL_BIOLOGY | REACTOME_IMMUNE_SYSTEM | REACTOME_HEMOSTASIS |
| 3570     | IL6R    | interleukin 6 receptor                                                                                                                      | REACTOME_DEVELOPMENTAL_BIOLOGY | REACTOME_IMMUNE_SYSTEM | REACTOME_HEMOSTASIS |
| 3837     | KPNB1   | karyopherin (importin) beta 1                                                                                                               | REACTOME_DEVELOPMENTAL_BIOLOGY | REACTOME_IMMUNE_SYSTEM | REACTOME_HEMOSTASIS |
| 4502     | MT2A    | metallothionein 2A                                                                                                                          | REACTOME_DEVELOPMENTAL_BIOLOGY | REACTOME_IMMUNE_SYSTEM | REACTOME_HEMOSTASIS |
| 1154     | CISH    | cytokine inducible SH2-containing protein                                                                                                   | REACTOME_DEVELOPMENTAL_BIOLOGY | REACTOME_IMMUNE_SYSTEM | REACTOME_HEMOSTASIS |
| 23636    | NUP62   | nucleoporin 62kDa                                                                                                                           | REACTOME_DEVELOPMENTAL_BIOLOGY | REACTOME_IMMUNE_SYSTEM | REACTOME_HEMOSTASIS |
| 53371    | NUP54   | nucleoporin 54kDa                                                                                                                           | REACTOME_DEVELOPMENTAL_BIOLOGY | REACTOME_IMMUNE_SYSTEM | REACTOME_HEMOSTASIS |
| 3664     | IRF6    | interferon regulatory factor 6                                                                                                              | REACTOME_DEVELOPMENTAL_BIOLOGY | REACTOME_IMMUNE_SYSTEM | REACTOME_HEMOSTASIS |
| 3430     | IFI35   | interferon-induced protein 35                                                                                                               | REACTOME_DEVELOPMENTAL_BIOLOGY | REACTOME_IMMUNE_SYSTEM | REACTOME_HEMOSTASIS |
| 6041     | RNA5EL  | ribonuclease L (2',5'-oligoadenylate synthetase-dependent                                                                                   |                                |                        |                     |

|                 |                                                                                                                                             |                     |
|-----------------|---------------------------------------------------------------------------------------------------------------------------------------------|---------------------|
| 1606 DGKA       | diacylglycerol kinase, alpha 80kDa                                                                                                          | REACTOME_HEMOSTASIS |
| 8526 DGKE       | diacylglycerol kinase, epsilon 64kDa                                                                                                        | REACTOME_HEMOSTASIS |
| 747 DAGLA       | diacylglycerol lipase, alpha                                                                                                                | REACTOME_HEMOSTASIS |
| 6647 SOD1       | superoxide dismutase 1, soluble                                                                                                             | REACTOME_HEMOSTASIS |
| 6814 STXBP3     | syntaxin binding protein 3                                                                                                                  | REACTOME_HEMOSTASIS |
| 813 CALU        | calumenin                                                                                                                                   | REACTOME_HEMOSTASIS |
| 10019 SH2B3     | SH2B adaptor protein 3                                                                                                                      | REACTOME_HEMOSTASIS |
| 10938 EHD1      | EH-domain containing 1                                                                                                                      | REACTOME_HEMOSTASIS |
| 30846 EHD2      | EH-domain containing 2                                                                                                                      | REACTOME_HEMOSTASIS |
| 50848 F11R      | F11 receptor                                                                                                                                | REACTOME_HEMOSTASIS |
| 682 BSG         | basigin (Ok blood group)                                                                                                                    | REACTOME_HEMOSTASIS |
| 2625 GATA3      | GATA binding protein 3                                                                                                                      | REACTOME_HEMOSTASIS |
| 161882 ZFPM1    | zinc finger protein, multitype 1                                                                                                            | REACTOME_HEMOSTASIS |
| 5140 PDE3B      | phosphodiesterase 3B, cGMP-inhibited                                                                                                        | REACTOME_HEMOSTASIS |
| 5139 PDE3A      | phosphodiesterase 3A, cGMP-inhibited                                                                                                        | REACTOME_HEMOSTASIS |
| 487 ATP2A1      | ATPase, Ca++ transporting, cardiac muscle, fast twitch 1                                                                                    | REACTOME_HEMOSTASIS |
| 6543 SLC8A2     | solute carrier family 8 (sodium/calcium exchanger), member 2                                                                                | REACTOME_HEMOSTASIS |
| 4846 NOS3       | nitric oxide synthase 3 (endothelial cell)                                                                                                  | REACTOME_HEMOSTASIS |
| 4842 NOS1       | nitric oxide synthase 1 (neuronal)                                                                                                          | REACTOME_HEMOSTASIS |
| 7804 LRP8       | low density lipoprotein receptor-related protein 8, apolipoprotein e receptor                                                               | REACTOME_HEMOSTASIS |
| 5152 PDE9A      | phosphodiesterase 9A                                                                                                                        | REACTOME_HEMOSTASIS |
| 23539 SLC16A8   | solute carrier family 16, member 8 (monocarboxylic acid transporter 3)                                                                      | REACTOME_HEMOSTASIS |
| 9123 SLC16A3    | solute carrier family 16, member 3 (monocarboxylic acid transporter 4)                                                                      | REACTOME_HEMOSTASIS |
| 9056 SLC7A7     | solute carrier family 7 (amino acid transporter light chain, y+L system), member 7                                                          | REACTOME_HEMOSTASIS |
| 481 ATP1B1      | ATPase, Na+/K+ transporting, beta 1 polypeptide                                                                                             | REACTOME_HEMOSTASIS |
| 482 ATP1B2      | ATPase, Na+/K+ transporting, beta 2 polypeptide                                                                                             | REACTOME_HEMOSTASIS |
| 961 CD47        | CD47 molecule                                                                                                                               | REACTOME_HEMOSTASIS |
| 23764 MAFF      | v-maf musculoaponeurotic fibrosarcoma oncogene homolog F (avian)                                                                            | REACTOME_HEMOSTASIS |
| 23468 CBX5      | chromobox homolog 5                                                                                                                         | REACTOME_HEMOSTASIS |
| 4778 NFE2       | nuclear factor (erythroid-derived 2), 45kDa                                                                                                 | REACTOME_HEMOSTASIS |
| 5547 PRCP       | prolylcarboxypeptidase (angiotensinase C)                                                                                                   | REACTOME_HEMOSTASIS |
| 51701 NLK       | nemo-like kinase                                                                                                                            | REACTOME_HEMOSTASIS |
| 5923 RASGRF1    | Ras protein-specific guanine nucleotide-releasing factor 1                                                                                  | REACTOME_HEMOSTASIS |
| 3312 HSPA8      | heat shock 70kDa protein 8                                                                                                                  | REACTOME_HEMOSTASIS |
| 773 CACNA1A     | calcium channel, voltage-dependent, P/Q type, alpha 1A subunit                                                                              | REACTOME_HEMOSTASIS |
| 10368 CACNG3    | calcium channel, voltage-dependent, gamma subunit 3                                                                                         | REACTOME_HEMOSTASIS |
| 27092 CACNG4    | calcium channel, voltage-dependent, gamma subunit 4                                                                                         | REACTOME_HEMOSTASIS |
| 627 BDNF        | brain-derived neurotrophic factor                                                                                                           | REACTOME_HEMOSTASIS |
| 8398 PLA2G6     | phospholipase A2, group VI (cytosolic, calcium-independent)                                                                                 | REACTOME_HEMOSTASIS |
| 81579 PLA2G12A  | phospholipase A2, group XIIA                                                                                                                | REACTOME_HEMOSTASIS |
| 10912 GADD45G   | growth arrest and DNA-damage-inducible, gamma                                                                                               | REACTOME_HEMOSTASIS |
| 4616 GADD45B    | growth arrest and DNA-damage-inducible, beta                                                                                                | REACTOME_HEMOSTASIS |
| 1649 DDIT3      | DNA-damage-inducible transcript 3                                                                                                           | REACTOME_HEMOSTASIS |
| 11184 MAP4K1    | mitogen-activated protein kinase kinase kinase kinase 1                                                                                     | REACTOME_HEMOSTASIS |
| 775 CACNA1C     | calcium channel, voltage-dependent, L type, alpha 1C subunit                                                                                | REACTOME_HEMOSTASIS |
| 23542 MAPK8IP2  | mitogen-activated protein kinase 8 interacting protein 2                                                                                    | REACTOME_HEMOSTASIS |
| 4763 NF1        | neurofibromin 1                                                                                                                             | REACTOME_HEMOSTASIS |
| 4137 MAPT       | microtubule-associated protein tau                                                                                                          | REACTOME_HEMOSTASIS |
| 2005 ELK4       | ELK4, ETS-domain protein (SRF accessory protein 1)                                                                                          | REACTOME_HEMOSTASIS |
| 5330 PLCB2      | phospholipase C, beta 2                                                                                                                     | REACTOME_HEMOSTASIS |
| 894 CCND2       | cyclin D2                                                                                                                                   | REACTOME_HEMOSTASIS |
| 6422 SFRP1      | secreted frizzled-related protein 1                                                                                                         | REACTOME_HEMOSTASIS |
| 1452 CSNK1A1    | casein kinase 1, alpha 1                                                                                                                    | REACTOME_HEMOSTASIS |
| 85407 NKD1      | naked cuticle homolog 1 (Drosophila)                                                                                                        | REACTOME_HEMOSTASIS |
| 10725 NFAT5     | nuclear factor of activated T-cells 5, tonicity-responsive                                                                                  | REACTOME_HEMOSTASIS |
| 144165 PRICKLE1 | prickle homolog 1 (Drosophila)                                                                                                              | REACTOME_HEMOSTASIS |
| 57216 VANGL2    | vang-like 2 (van gogh, Drosophila)                                                                                                          | REACTOME_HEMOSTASIS |
| 43 ACHE         | acetylcholinesterase                                                                                                                        | REACTOME_HEMOSTASIS |
| 114 ADCY8       | adenylate cyclase 8 (brain)                                                                                                                 | REACTOME_HEMOSTASIS |
| 108 ADCY2       | adenylate cyclase 2 (brain)                                                                                                                 | REACTOME_HEMOSTASIS |
| 10142 AKAP9     | A kinase (PRKA) anchor protein (yotiao) 9                                                                                                   | REACTOME_HEMOSTASIS |
| 6844 VAMP2      | vesicle-associated membrane protein 2 (synaptobrevin 2)                                                                                     | REACTOME_HEMOSTASIS |
| 6812 STXBP1     | syntaxin binding protein 1                                                                                                                  | REACTOME_HEMOSTASIS |
| 2560 GABRB1     | gamma-aminobutyric acid (GABA) A receptor, beta 1                                                                                           | REACTOME_HEMOSTASIS |
| 2562 GABRB3     | gamma-aminobutyric acid (GABA) A receptor, beta 3                                                                                           | REACTOME_HEMOSTASIS |
| 1134 CHRNA1     | cholinergic receptor, nicotinic, alpha 1 (muscle)                                                                                           | REACTOME_HEMOSTASIS |
| 2906 GRIN2D     | glutamate receptor, ionotropic, N-methyl D-aspartate 2D                                                                                     | REACTOME_HEMOSTASIS |
| 2550 GABBR1     | gamma-aminobutyric acid (GABA) B receptor, 1                                                                                                | REACTOME_HEMOSTASIS |
| 4747 NEFL       | neurofilament, light polypeptide                                                                                                            | REACTOME_HEMOSTASIS |
| 3759 KCNJ2      | potassium inwardly-rectifying channel, subfamily J, member 2                                                                                | REACTOME_HEMOSTASIS |
| 6529 SLC6A1     | solute carrier family 6 (neurotransmitter transporter, GABA), member 1                                                                      | REACTOME_HEMOSTASIS |
| 2752 GLUL       | glutamate-ammonia ligase                                                                                                                    | REACTOME_HEMOSTASIS |
| 2572 GAD2       | glutamate decarboxylase 2 (pancreatic islets and brain, 65kDa)                                                                              | REACTOME_HEMOSTASIS |
| 3745 KCNB1      | potassium voltage-gated channel, Shab-related subfamily, member 1                                                                           | REACTOME_HEMOSTASIS |
| 3758 KCNJ1      | potassium inwardly-rectifying channel, subfamily J, member 1                                                                                | REACTOME_HEMOSTASIS |
| 23416 KCNH3     | potassium voltage-gated channel, subfamily H (eag-related), member 3                                                                        | REACTOME_HEMOSTASIS |
| 3743 KCNA7      | potassium voltage-gated channel, shaker-related subfamily, member 7                                                                         | REACTOME_HEMOSTASIS |
| 3751 KCND2      | potassium voltage-gated channel, Shal-related subfamily, member 2                                                                           | REACTOME_HEMOSTASIS |
| 3757 KCNH2      | potassium voltage-gated channel, subfamily H (eag-related), member 2                                                                        | REACTOME_HEMOSTASIS |
| 9132 KCNQ4      | potassium voltage-gated channel, KQT-like subfamily, member 4                                                                               | REACTOME_HEMOSTASIS |
| 3764 KCN18      | potassium inwardly-rectifying channel, subfamily J, member 8                                                                                | REACTOME_HEMOSTASIS |
| 3775 KCNK1      | potassium channel, subfamily K, member 1                                                                                                    | REACTOME_HEMOSTASIS |
| 3780 KCNN1      | potassium intermediate/small conductance calcium-activated channel, subfamily N, member 1                                                   | REACTOME_HEMOSTASIS |
| 3781 KCNN2      | potassium intermediate/small conductance calcium-activated channel, subfamily N, member 2                                                   | REACTOME_HEMOSTASIS |
| 57657 HCN3      | hyperpolarization activated cyclic nucleotide-gated potassium channel 3                                                                     | REACTOME_HEMOSTASIS |
| 610 HCN2        | hyperpolarization activated cyclic nucleotide-gated potassium channel 2                                                                     | REACTOME_HEMOSTASIS |
| 10052 GIC1      | gap junction protein, gamma 1, 45kDa                                                                                                        | REACTOME_HEMOSTASIS |
| 84694 GJA10     | gap junction protein, alpha 10, 62kDa                                                                                                       | REACTOME_HEMOSTASIS |
| 10228 STX6      | syntaxin 6                                                                                                                                  | REACTOME_HEMOSTASIS |
| 6809 STX3       | syntaxin 3                                                                                                                                  | REACTOME_HEMOSTASIS |
| 5308 PITX2      | paired-like homeodomain 2                                                                                                                   | REACTOME_HEMOSTASIS |
| 2597 GAPDH      | glyceraldehyde-3-phosphate dehydrogenase                                                                                                    | REACTOME_HEMOSTASIS |
| 607 BCL9        | B-cell CLL/lymphoma 9                                                                                                                       | REACTOME_HEMOSTASIS |
| 83999 KREMEN1   | kringle containing transmembrane protein 1                                                                                                  | REACTOME_HEMOSTASIS |
| 58480 RHOU      | ras homolog gene family, member U                                                                                                           | REACTOME_HEMOSTASIS |
| 85458 DIXDC1    | DIX domain containing 1                                                                                                                     | REACTOME_HEMOSTASIS |
| 56034 PDGFC     | platelet derived growth factor C                                                                                                            | REACTOME_HEMOSTASIS |
| 7059 THBS3      | thrombospondin 3                                                                                                                            | REACTOME_HEMOSTASIS |
| 1311 COMP       | cartilage oligomeric matrix protein                                                                                                         | REACTOME_HEMOSTASIS |
| 1302 COL11A2    | collagen, type XI, alpha 2                                                                                                                  | REACTOME_HEMOSTASIS |
| 5649 RELN       | reelin                                                                                                                                      | REACTOME_HEMOSTASIS |
| 5501 PPP1CC     | protein phosphatase 1, catalytic subunit, gamma isozyme                                                                                     | REACTOME_HEMOSTASIS |
| 29895 MYLPF     | myosin light chain, phosphorylatable, fast skeletal muscle                                                                                  | REACTOME_HEMOSTASIS |
| 25759 SHC2      | SHC (Src homology 2 domain containing) transforming protein 2                                                                               | REACTOME_HEMOSTASIS |
| 53358 SHC3      | SHC (Src homology 2 domain containing) transforming protein 3                                                                               | REACTOME_HEMOSTASIS |
| 2324 FLT4       | fms-related tyrosine kinase 4                                                                                                               | REACTOME_HEMOSTASIS |
| 6387 CXCL12     | chemokine (C-X-C motif) ligand 12                                                                                                           | REACTOME_HEMOSTASIS |
| 54437 SEMA5B    | sema domain, seven thrombospondin repeats (type 1 and type 1-like), transmembrane domain (TM) and short cytoplasmic domain, (semaphorin) 5B | REACTOME_HEMOSTASIS |
| 22854 NTNG1     | netrin G1                                                                                                                                   | REACTOME_HEMOSTASIS |
| 2048 EPHB2      | EPH receptor B2                                                                                                                             | REACTOME_HEMOSTASIS |
| 1946 EFNA5      | ephrin-A5                                                                                                                                   | REACTOME_HEMOSTASIS |
| 2047 EPHB1      | EPH receptor B1                                                                                                                             | REACTOME_HEMOSTASIS |
| 1948 EFN2       | ephrin-B2                                                                                                                                   | REACTOME_HEMOSTASIS |
| 2050 EPHB4      | EPH receptor B4                                                                                                                             | REACTOME_HEMOSTASIS |
| 1949 EFN3       | ephrin-B3                                                                                                                                   | REACTOME_HEMOSTASIS |
| 1943 EFN2       | ephrin-A2                                                                                                                                   | REACTOME_HEMOSTASIS |
| 2042 EPHA3      | EPH receptor A3                                                                                                                             | REACTOME_HEMOSTASIS |
| 2044 EPHA5      | EPH receptor A5                                                                                                                             | REACTOME_HEMOSTASIS |
| 2045 EPHA7      | EPH receptor A7                                                                                                                             | REACTOME_HEMOSTASIS |
| 3339 HSPG2      | heparan sulfate proteoglycan 2                                                                                                              | REACTOME_HEMOSTASIS |
| 50846 DHH       | desert hedgehog                                                                                                                             | REACTOME_HEMOSTASIS |
| 102 ADAM10      | ADAM metalloproteinase domain 10                                                                                                            | REACTOME_HEMOSTASIS |
| 1435 CSF1       | colony stimulating factor 1 (macrophage)                                                                                                    | REACTOME_HEMOSTASIS |
| 3481 IGF2       | insulin-like growth factor 2 (somatomedin A)                                                                                                | REACTOME_HEMOSTASIS |
| 8646 CHRD       | chordin                                                                                                                                     | REACTOME_HEMOSTASIS |
| 3624 INHBA      | inhibin, beta A                                                                                                                             | REACTOME_HEMOSTASIS |
| 268 AMH         | anti-Mullerian hormone                                                                                                                      | REACTOME_HEMOSTASIS |
| 3976 LIF        | leukemia inhibitory factor (cholinergic differentiation factor)                                                                             | REACTOME_HEMOSTASIS |
| 3589 IL11       | interleukin 11                                                                                                                              | REACTOME_HEMOSTASIS |
| 23529 CLCF1     | cardiotrophin-like cytokine factor 1                                                                                                        | REACTOME_HEMOSTASIS |
| 64806 IL25      | interleukin 25                                                                                                                              | REACTOME_HEMOSTASIS |
| 8744 TNFSF9     | tumor necrosis factor (ligand) superfamily, member 9                                                                                        | REACTOME_HEMOSTASIS |
| 10148 EBI3      | Epstein-Barr virus induced 3                                                                                                                | REACTOME_HEMOSTASIS |
| 222663 SCUBE3   | signal peptide, CUB domain, EGF-like 3                                                                                                      | REACTOME_HEMOSTASIS |
| 651 BMP3        | bone morphogenetic protein 3                                                                                                                | REACTOME_HEMOSTASIS |
| 10082 GPC6      | glypican 6                                                                                                                                  | REACTOME_HEMOSTASIS |
| 3956 LGALS1     | lectin, galactoside-binding, soluble, 1                                                                                                     | REACTOME_HEMOSTASIS |
| 8985 PLOD3      | procollagen-lysine, 2-oxoglutarate 5-dioxygenase 3                                                                                          | REACTOME_HEMOSTASIS |
| 10536 LEPREL2   | leprecan-like 2                                                                                                                             | REACTOME_HEMOSTASIS |
| 4325 MMP16      | matrix metalloproteinase 16 (membrane-inserted)                                                                                             | REACTOME_HEMOSTASIS |
| 7077 TIMP2      | TIMP metalloproteinase inhibitor 2                                                                                                          | REACTOME_HEMOSTASIS |
| 5033 P4HA1      | prolyl 4-hydroxylase, alpha polypeptide 1                                                                                                   | REACTOME_HEMOSTASIS |
| 8751 ADAM15     | ADAM metalloproteinase domain 15                                                                                                            | REACTOME_HEMOSTASIS |
| 114904 C1QTNF6  | C1q and tumor necrosis factor related protein 6                                                                                             | REACTOME_HEMOSTASIS |
| 653145 ANXA8    | annexin A8                                                                                                                                  | REACTOME_HEMOSTASIS |
| 8416 ANXA9      | annexin A9                                                                                                                                  | REACTOME_HEMOSTASIS |
| 11173 ADAMTS7   | ADAM metalloproteinase with thrombospondin type 1 motif, 7                                                                                  | REACTOME_HEMOSTASIS |
| 23213 SULF1     | sulfatase 1                                                                                                                                 | REACTOME_HEMOSTASIS |
| 339366 ADAMTSL5 | ADAMTS-like 5                                                                                                                               | REACTOME_HEMOSTASIS |
| 54507 ADAMTSL4  | ADAMTS-like 4                                                                                                                               | REACTOME_HEMOSTASIS |
| 55959 SULF2     | sulfatase 2                                                                                                                                 | REACTOME_HEMOSTASIS |
| 81794 ADAMTS10  | ADAM metalloproteinase with thrombospondin type 1 motif, 10                                                                                 | REACTOME_HEMOSTASIS |
| 84695 LXXL3     | lysyl oxidase-like 3                                                                                                                        | REACTOME_HEMOSTASIS |
| 9507 ADAMTS4    | ADAM metalloproteinase with thrombospondin type 1 motif, 4                                                                                  | REACTOME_HEMOSTASIS |
| 3491 CYR61      | cysteine-rich, angiogenic inducer, 61                                                                                                       | REACTOME_HEMOSTASIS |
| 1462 VCAN       | versican                                                                                                                                    | REACTOME_HEMOSTASIS |
| 63827 BCAN      | brevican                                                                                                                                    | REACTOME_HEMOSTASIS |
| 1305 COL13A1    | collagen, type XIII, alpha 1                                                                                                                | REACTOME_HEMOSTASIS |
| 1307 COL16A1    | collagen, type XVI, alpha 1                                                                                                                 | REACTOME_HEMOSTASIS |
| 3487 IGFBP4     | insulin-like growth factor binding protein 4                                                                                                | REACTOME_HEMOSTASIS |
| 1310 COL19A1    | collagen, type XIX, alpha 1                                                                                                                 | REACTOME_HEMOSTASIS |
| 11117 EMILIN1   | elastin microfibril interfacer 1                                                                                                            | REACTOME_HEMOSTASIS |
| 25992 SNED1     | sushi, nidogen and EGF-like domains 1                                                                                                       | REACTOME_HEMOSTASIS |
| 340419 RSPQ2    | R-spondin 2                                                                                                                                 | REACTOME_HEMOSTASIS |
| 4053 LTBP2      | latent transforming growth factor beta binding protein 2                                                                                    | REACTOME_HEMOSTASIS |
| 4054 LTBP3      | latent transforming growth factor beta binding protein 3                                                                                    | REACTOME_HEMOSTASIS |
| 4753 NELL2      | NEL-like 2 (chicken)                                                                                                                        | REACTOME_HEMOSTASIS |
| 64856 VWA1      | von Willebrand factor A domain containing 1                                                                                                 | REACTOME_HEMOSTASIS |
| 8425 LTBP4      | latent transforming growth factor beta binding protein 4                                                                                    | REACTOME_HEMOSTASIS |
| 8877 SPHK1      | sphingosine kinase 1                                                                                                                        | REACTOME_HEMOSTASIS |
| 8826 IQGAP1     | IQ motif containing GTPase activating protein 1                                                                                             | REACTOME_HEMOSTASIS |
| 10458 BAIAP2    | BAI1-associated protein 2                                                                                                                   | REACTOME_HEMOSTASIS |
| 10093 ARPC4     | actin related protein 2/3 complex, subunit 4, 20kDa                                                                                         | REACTOME_HEMOSTASIS |
| 8844 KSR1       | kinase suppressor of ras 1                                                                                                                  | REACTOME_HEMOSTASIS |
| 5795 PTPRJ      | protein tyrosine phosphatase, receptor type, J                                                                                              | REACTOME_HEMOSTASIS |
| 1796 DOK1       | docking protein 1, 62kDa (downstream of tyrosine kinase 1)                                                                                  | REACTOME_HEMOSTASIS |
| 4035 LRP1       | low density lipoprotein receptor-related protein 1                                                                                          | REACTOME_HEMOSTASIS |

|                |                                                                                                     |
|----------------|-----------------------------------------------------------------------------------------------------|
| 9351 SLC9A3R2  | solute carrier family 9 (sodium/hydrogen exchanger), member 3 regulator 2                           |
| 8395 PIP5K1B   | phosphatidylinositol-4-phosphate 5-kinase, type I, beta                                             |
| 6095 RORA      | RAR-related orphan receptor A                                                                       |
| 9572 NR1D1     | nuclear receptor subfamily 1, group D, member 1                                                     |
| 8612 PPAP2C    | phosphatidic acid phosphatase type 2C                                                               |
| 8613 PPAP2B    | phosphatidic acid phosphatase type 2B                                                               |
| 23446 SLC44A1  | solute carrier family 44, member 1                                                                  |
| 5297 PI4KA     | phosphatidylinositol 4-kinase, catalytic, alpha                                                     |
| 137964 AGPAT6  | 1-acylglycerol-3-phosphate O-acyltransferase 6 (lysophosphatidic acid acyltransferase, zeta)        |
| 64900 LPIN3    | lipin 3                                                                                             |
| 9218 VAPA      | VAMP (vesicle-associated membrane protein)-associated protein A, 33kDa                              |
| 1119 CHKA      | choline kinase alpha                                                                                |
| 10400 PEMT     | phosphatidylethanolamine N-methyltransferase                                                        |
| 5130 PCYT1A    | phosphate cytidylyltransferase 1, choline, alpha                                                    |
| 9926 LPGAT1    | lysophosphatidylglycerol acyltransferase 1                                                          |
| 81490 PTDS52   | phosphatidylserine synthase 2                                                                       |
| 22901 ARSG     | arylsulfatase G                                                                                     |
| 64781 CERK     | ceramide kinase                                                                                     |
| 377 ARF3       | ADP-ribosylation factor 3                                                                           |
| 81537 SGPPI1   | sphingosine-1-phosphate phosphatase 1                                                               |
| 8879 SGLP1     | sphingosine-1-phosphate lyase 1                                                                     |
| 10558 SPTLC1   | serine palmitoyltransferase, long chain base subunit 1                                              |
| 10825 NEU3     | sialidase 3 (membrane sialidase)                                                                    |
| 56624 ASAH2    | N-acylsphingosine amidohydrolase (non-lysosomal ceramidase) 2                                       |
| 9110 MTMR4     | myotubularin related protein 4                                                                      |
| 55361 PI4K3A   | phosphatidylinositol 4-kinase type 2 alpha                                                          |
| 8898 MTMR2     | myotubularin related protein 2                                                                      |
| 2194 FASN      | fatty acid synthase                                                                                 |
| 5034 P4HB      | prolyl 4-hydroxylase, beta polypeptide                                                              |
| 4862 NPAS2     | neuronal PAS domain protein 2                                                                       |
| 19 ABCA1       | ATP-binding cassette, sub-family A (ABC1), member 1                                                 |
| 7003 TEAD1     | TEA domain family member 1 (SV40 transcriptional enhancer factor)                                   |
| 7004 TEAD4     | TEA domain family member 4                                                                          |
| 211 ALAS1      | aminolevulinic acid, delta-, synthase 1                                                             |
| 2222 FDFT1     | farnesyl-diphosphate farnesyltransferase 1                                                          |
| 3155 HMGCL     | 3-hydroxymethyl-3-methylglutaryl-CoA lyase                                                          |
| 79071 ELOVL6   | ELOVL fatty acid elongase 6                                                                         |
| 3931 LCAT      | lecithin-cholesterol acyltransferase                                                                |
| 344 APOC2      | apolipoprotein C-II                                                                                 |
| 81693 AMN      | amionless homolog (mouse)                                                                           |
| 9415 FADS2     | fatty acid desaturase 2                                                                             |
| 4047 LSS       | lanosterol synthase (2,3-oxidosqualene-lanosterol cyclase)                                          |
| 3422 IDI1      | isopentenyl-diphosphate delta isomerase 1                                                           |
| 3292 HSD17B1   | hydroxysteroid (17-beta) dehydrogenase 1                                                            |
| 2619 GAS1      | growth arrest-specific 1                                                                            |
| 7546 ZIC2      | Zic family member 2                                                                                 |
| 7074 TIAM1     | T-cell lymphoma invasion and metastasis 1                                                           |
| 8394 PIP5K1A   | phosphatidylinositol-4-phosphate 5-kinase, type I, alpha                                            |
| 8874 ARHGGEF7  | Rho guanine nucleotide exchange factor (GEF) 7                                                      |
| 623 BDKRB1     | bradykinin receptor B1                                                                              |
| 79837 PI4K2C   | phosphatidylinositol-5-phosphate 4-kinase, type II, gamma                                           |
| 10788 IQGAP2   | IQ motif containing GTPase activating protein 2                                                     |
| 5584 PRKC1     | protein kinase C, iota                                                                              |
| 8997 KALRN     | kallirin, RhoGEF kinase                                                                             |
| 9181 ARHGGEF2  | Rho/Rac guanine nucleotide exchange factor (GEF) 2                                                  |
| 57142 RTN4     | reticulin 4                                                                                         |
| 10488 CREB3    | cAMP responsive element binding protein 3                                                           |
| 10254 STAM2    | signal transducing adaptor molecule (SH3 domain and ITAM motif) 2                                   |
| 11140 CDC37    | cell division cycle 37 homolog (S. cerevisiae)                                                      |
| 26018 LRIG1    | leucine-rich repeats and immunoglobulin-like domains 1                                              |
| 8379 MAD1L1    | MAD1 mitotic arrest deficient-like 1 (yeast)                                                        |
| 9184 BUB3      | budding uninhibited by benzimidazoles 3 homolog (yeast)                                             |
| 10274 STAG1    | stromal antigen 1                                                                                   |
| 4174 MCM5      | minichromosome maintenance complex component 5                                                      |
| 8317 CDC7      | cell division cycle 7 homolog (S. cerevisiae)                                                       |
| 9088 PKMYT1    | protein kinase, membrane associated tyrosine/threonine 1                                            |
| 151648 SGOL1   | shugoshin-like 1 (S. pombe)                                                                         |
| 6232 RPS27     | ribosomal protein S27                                                                               |
| 11130 ZWINT    | ZW10 interactor                                                                                     |
| 25909 AHCTF1   | AT hook containing transcription factor 1                                                           |
| 80776 B9D2     | B9 protein domain 2                                                                                 |
| 57804 POLD4    | polymerase (DNA-directed), delta 4                                                                  |
| 7084 TK2       | thymidine kinase 2, mitochondrial                                                                   |
| 22897 CFP164   | centrosomal protein 164kDa                                                                          |
| 10806 SOCCA8   | serologically defined colon cancer antigen 8                                                        |
| 80321 CEP70    | centrosomal protein 70kDa                                                                           |
| 7538 ZFP36     | zinc finger protein 36, C3H type, homolog (mouse)                                                   |
| 1124 CHN2      | chimerin (chimaerin) 2                                                                              |
| 378 ARF4       | ADP-ribosylation factor 4                                                                           |
| 26127 FGFR1OP2 | FGFR1 oncogene partner 2                                                                            |
| 56288 PARD3    | par-3 partitioning defective 3 homolog (C. elegans)                                                 |
| 2327 NEDD4L    | neural precursor cell expressed, developmentally down-regulated 4-like                              |
| 1601 DAB2      | disabled homolog 2, mitogen-responsive phosphoprotein (Drosophila)                                  |
| 2065 ERBB3     | v-erb-b2 erythroblastic leukemia viral oncogene homolog 3 (avian)                                   |
| 382 ARF6       | ADP-ribosylation factor 6                                                                           |
| 2869 GRK5      | G protein-coupled receptor kinase 5                                                                 |
| 157 ADRBK2     | adrenergic, beta, receptor kinase 2                                                                 |
| 2868 GRK4      | G protein-coupled receptor kinase 4                                                                 |
| 7037 TFR3      | transferrin receptor (p90, CD71)                                                                    |
| 84313 VPS25    | vacuolar protein sorting 25 homolog (S. cerevisiae)                                                 |
| 9230 RAB11B    | RAB11B, member RAS oncogene family                                                                  |
| 23362 PSD3     | pleckstrin and Sec7 domain containing 3                                                             |
| 80230 RUFY1    | RUN and FYVE domain containing 1                                                                    |
| 9135 RABEP1    | rabaptin, RAB GTPase binding effector protein 1                                                     |
| 545 ATR        | ataxia telangiectasia and Rad3 related                                                              |
| 10459 MAD2L2   | MAD2 mitotic arrest deficient-like 2 (yeast)                                                        |
| 9700 ESLP1     | extra spindle pole bodies homolog 1 (S. cerevisiae)                                                 |
| 7272 TTK       | TTK protein kinase                                                                                  |
| 10580 SORBS1   | sorbin and SH3 domain containing 1                                                                  |
| 5787 PTPN8     | protein tyrosine phosphatase, receptor type, B                                                      |
| 2212 FCGR2A    | Fc fragment of IgG, low affinity IIa, receptor (CD32)                                               |
| 672 BRCA1      | breast cancer 1, early onset                                                                        |
| 10277 UBE4B    | ubiquitination factor E4B                                                                           |
| 27339 PRPF19   | PRP19/PSO4 pre-mRNA processing factor 19 homolog (S. cerevisiae)                                    |
| 26091 HERC4    | hect domain and RLD 4                                                                               |
| 4281 MID1      | midline 1 (Opitz/BBB syndrome)                                                                      |
| 57448 BIRC6    | baculoviral IAP repeat containing 6                                                                 |
| 8925 HERC1     | hect (homologous to the E6-AP (UBE3A) carboxyl terminus) domain and RCC1 (CHC1)-like domain (RLD) 1 |
| 9586 CREB5     | cAMP responsive element binding protein 5                                                           |
| 4000 LMNA      | lamin A/C                                                                                           |
| 9765 ZFYVE16   | zinc finger, FYVE domain containing 16                                                              |
| 6498 SKIL      | SKI-like oncogene                                                                                   |
| 7049 TGFBR3    | transforming growth factor, beta receptor III                                                       |
| 25805 BAMBI    | BMP and activin membrane-bound inhibitor homolog (Xenopus laevis)                                   |
| 4830 NME1      | non-metastatic cells 1, protein (NM23A) expressed in                                                |
| 79872 CBLL1    | Cas-Br-M (murine) ecotropic retroviral transforming sequence-like 1                                 |
| 9970 NR1I3     | nuclear receptor subfamily 1, group I, member 3                                                     |
| 2100 ESR2      | estrogen receptor 2 (ER beta)                                                                       |
| 4306 NR3C2     | nuclear receptor subfamily 3, group C, member 2                                                     |
| 10062 NR1H3    | nuclear receptor subfamily 1, group H, member 3                                                     |
| 7067 THRA      | thyroid hormone receptor, alpha                                                                     |
| 5916 RARG      | retinoic acid receptor, gamma                                                                       |
| 8013 NR4A3     | nuclear receptor subfamily 4, group A, member 3                                                     |
| 10002 NR2E3    | nuclear receptor subfamily 2, group E, member 3                                                     |
| 2516 NRS1A     | nuclear receptor subfamily 5, group A, member 1                                                     |
| 4929 NR4A2     | nuclear receptor subfamily 4, group A, member 2                                                     |
| 6096 RORB      | RAR-related orphan receptor B                                                                       |
| 6667 SP1       | Sp1 transcription factor                                                                            |
| 28996 HIPK2    | homeodomain interacting protein kinase 2                                                            |
| 2944 GSTM1     | glutathione S-transferase mu 1                                                                      |
| 463 ZFXH3      | zinc finger homeobox 3                                                                              |
| 3726 JUNB      | jun B proto-oncogene                                                                                |
| 10987 COPS5    | COP9 constitutive photomorphogenic homolog subunit 5 (Arabidopsis)                                  |
| 2355 FOSL2     | FOS-like antigen 2                                                                                  |
| 9988 DMTF1     | cyclin D binding myb-like transcription factor 1                                                    |
| 2354 FOSB      | FBJ murine osteosarcoma viral oncogene homolog B                                                    |
| 4082 MARCKS    | myristoylated alanine-rich protein kinase C substrate                                               |
| 3670 ISL1      | ISL LIM homeobox 1                                                                                  |
| 1045 CDX2      | caudal type homeobox 2                                                                              |
| 51085 MLXIPL   | MLX interacting protein-like                                                                        |
| 6945 MLX       | MAX-like protein X                                                                                  |
| 3708 ITPR1     | inositol 1,4,5-trisphosphate receptor, type 1                                                       |
| 6262 RYR2      | ryanodine receptor 2 (cardiac)                                                                      |
| 6442 SGCA      | sarcoglycan, alpha (50kDa dystrophin-associated glycoprotein)                                       |
| 7168 TPM1      | tropomyosin 1 (alpha)                                                                               |
| 6908 TBP       | TATA box binding protein                                                                            |
| 5077 PAX3      | paired box 3                                                                                        |
| 11016 ATF7     | activating transcription factor 7                                                                   |
| 6046 BRD2      | bromodomain containing 2                                                                            |
| 3398 ID2       | inhibitor of DNA binding 2, dominant negative helix-loop-helix protein                              |
| 9241 NOG       | noggin                                                                                              |
| 10803 CCR9     | chemokine (C-C motif) receptor 9                                                                    |
| 2826 CCR10     | chemokine (C-C motif) receptor 10                                                                   |
| 1813 DRD2      | dopamine receptor D2                                                                                |
| 65108 MARCKS1L | MARCKS-like 1                                                                                       |
| 2319 FLOT2     | flotillin 2                                                                                         |
| 133 ADM        | adrenomedullin                                                                                      |
| 10266 RAMP2    | receptor (G protein-coupled) activity modifying protein 2                                           |
| 2691 GHRH      | growth hormone releasing hormone                                                                    |
| 27113 BBC3     | BCL2 binding component 3                                                                            |
| 578 BAK1       | BCL2-antagonist/killer 1                                                                            |
| 274 BIN1       | bridging integrator 1                                                                               |
| 7490 WT1       | Wilms tumor 1                                                                                       |
| 54894 RNF43    | ring finger protein 43                                                                              |
| 200734 SPRED2  | sprouty-related, EVH1 domain containing 2                                                           |
| 26228 STAP1    | signal transducing adaptor family member 1                                                          |
| 201163 FLCN    | folliculin                                                                                          |
| 10381 TUBB3    | tubulin, beta 3 class III                                                                           |
| 51807 TUBA8    | tubulin, alpha 8                                                                                    |
| 4916 NTRK3     | neurotrophic tyrosine kinase, receptor, type 3                                                      |
| 3162 HMOX1     | heme oxygenase (decycling) 1                                                                        |
| 5236 PGM1      | phosphoglucomutase 1                                                                                |
| 5211 PFKL      | phosphofructokinase, liver                                                                          |
| 768 CA9        | carbonic anhydrase IX                                                                               |
| 64283 RGNF1    | 190 kDa guanine nucleotide exchange factor                                                          |
| 4953 ODC1      | ornithine decarboxylase 1                                                                           |
| 6470 SHMT1     | serine hydroxymethyltransferase 1 (soluble)                                                         |



|                 |                                                                                                             |
|-----------------|-------------------------------------------------------------------------------------------------------------|
| 586 BCAT1       | branched chain amino-acid transaminase 1, cytosolic                                                         |
| 4831 NME2       | non-metastatic cells 2, protein (NM23B) expressed in                                                        |
| 3308 HSPA4      | heat shock 70kDa protein 4                                                                                  |
| 10935 PRDX3     | peroxiredoxin 3                                                                                             |
| 648 BM11        | BM11 polycomb ring finger oncogene                                                                          |
| 8886 DDX18      | DEAD (Asp-Glu-Ala-Asp) box polypeptide 18                                                                   |
| 92140 MTDH      | metadherin                                                                                                  |
| 4836 NMT1       | N-myristoyltransferase 1                                                                                    |
| 90427 BMF       | Bcl2 modifying factor                                                                                       |
| 22985 ACIN1     | apoptotic chromatin condensation inducer 1                                                                  |
| 2620 GAS2       | growth arrest-specific 2                                                                                    |
| 3005 H1FO       | H1 histone family, member 0                                                                                 |
| 3006 HIST1H1C   | histone cluster 1, H1c                                                                                      |
| 2538 G6PC       | glucose-6-phosphatase, catalytic subunit                                                                    |
| 3178 HNRNPA1    | heterogeneous nuclear ribonucleoprotein A1                                                                  |
| 3092 HIP1       | huntingtin interacting protein 1                                                                            |
| 8204 NRIP1      | nuclear receptor interacting protein 1                                                                      |
| 26524 LATS2     | LATS, large tumor suppressor, homolog 2 (Drosophila)                                                        |
| 23598 PATZ1     | POZ (BTB) and AT hook containing zinc finger 1                                                              |
| 24149 ZNF318    | zinc finger protein 318                                                                                     |
| 57178 ZMIZ1     | zinc finger, MIZ-type containing 1                                                                          |
| 7041 TGFBI1     | transforming growth factor beta 1 induced transcript 1                                                      |
| 6515 SLC2A3     | solute carrier family 2 (facilitated glucose transporter), member 3                                         |
| 529 ATP6V1E1    | ATPase, H+ transporting, lysosomal 31kDa, V1 subunit E1                                                     |
| 534 ATP6V1G2    | ATPase, H+ transporting, lysosomal 13kDa, V1 subunit G2                                                     |
| 6533 SLC6A6     | solute carrier family 6 (neurotransmitter transporter, taurine), member 6                                   |
| 6570 SLC18A1    | solute carrier family 18 (vesicular monoamine), member 1                                                    |
| 6536 SLC6A9     | solute carrier family 6 (neurotransmitter transporter, glycine), member 9                                   |
| 64849 SLC13A3   | solute carrier family 13 (sodium-dependent dicarboxylate transporter), member 3                             |
| 81031 SLC2A10   | solute carrier family 2 (facilitated glucose transporter), member 10                                        |
| 7781 SLC30A3    | solute carrier family 30 (zinc transporter), member 3                                                       |
| 7922 SLC39A7    | solute carrier family 39 (zinc transporter), member 7                                                       |
| 6524 SLC5A2     | solute carrier family 5 (sodium/glucose cotransporter), member 2                                            |
| 6558 SLC12A2    | solute carrier family 12 (sodium/potassium/chloride transporters), member 2                                 |
| 6509 SLC1A4     | solute carrier family 1 (glutamate/neutral amino acid transporter), member 4                                |
| 23315 SLC9A8    | solute carrier family 9 (sodium/hydrogen exchanger), member 8                                               |
| 57468 SLC12A5   | solute carrier family 12 (potassium/chloride transporter), member 5                                         |
| 6521 SLC4A1     | solute carrier family 4, anion exchanger, member 1 (erythrocyte membrane protein band 3, Diego blood group) |
| 9497 SLC4A7     | solute carrier family 4, sodium bicarbonate cotransporter, member 7                                         |
| 477 ATP1A2      | ATPase, Na+/K+ transporting, alpha 2 polypeptide                                                            |
| 10396 ATP8A1    | ATPase, aminophospholipid transporter (APLT), class I, type 8A, member 1                                    |
| 85440 DOCK7     | dedicator of cytokinesis 7                                                                                  |
| 6487 ST3GAL3    | ST3 beta-galactoside alpha-2,3-sialyltransferase 3                                                          |
| 3955 LFNG       | LFNG O-fucosylpeptide 3-beta-N-acetylglucosaminyltransferase                                                |
| 4242 MFNG       | MFNG O-fucosylpeptide 3-beta-N-acetylglucosaminyltransferase                                                |
| 5986 RFNG       | RFNG O-fucosylpeptide 3-beta-N-acetylglucosaminyltransferase                                                |
| 192669 EIF2C3   | eukaryotic translation initiation factor 2C, 3                                                              |
| 26523 EIF2C1    | eukaryotic translation initiation factor 2C, 1                                                              |
| 23112 TNRC6B    | trinucleotide repeat containing 6B                                                                          |
| 4343 MOV10      | Mov10, Moloney leukemia virus 10, homolog (mouse)                                                           |
| 23509 POFU1T1   | protein O-fucosyltransferase 1                                                                              |
| 8703 B4GALT3    | UDP-Gal:beta-GlcNAc beta 1,4-galactosyltransferase, polypeptide 3                                           |
| 10678 B3GNT2    | UDP-GlcNAc:betaGal beta-1,3-N-acetylglucosaminyltransferase 2                                               |
| 6482 ST3GAL1    | ST3 beta-galactoside alpha-2,3-sialyltransferase 1                                                          |
| 2799 GNS        | glucosamine (N-acetyl)-6-sulfatase                                                                          |
| 3938 LCT        | lactase                                                                                                     |
| 7167 TPI1       | triosephosphate isomerase 1                                                                                 |
| 2582 GALE       | UDP-galactose-4-epimerase                                                                                   |
| 2584 GALK1      | galactokinase 1                                                                                             |
| 2026 ENO2       | enolase 2 (gamma, neuronal)                                                                                 |
| 5208 PFKFB2     | 6-phosphofructo-2-kinase/fructose-2,6-biphosphatase 2                                                       |
| 9953 HS3ST3B1   | heparan sulfate (glucosamine) 3-O-sulfotransferase 3B1                                                      |
| 9653 HS2ST1     | heparan sulfate 2-O-sulfotransferase 1                                                                      |
| 9957 HS3ST1     | heparan sulfate (glucosamine) 3-O-sulfotransferase 1                                                        |
| 6476 SI         | sucrase-isomaltase (alpha-glucosidase)                                                                      |
| 3269 HRH1       | histamine receptor H1                                                                                       |
| 3362 HTR6       | 5-hydroxytryptamine (serotonin) receptor 6                                                                  |
| 904 CCNT1       | cyclin T1                                                                                                   |
| 11168 PSIP1     | PC4 and SFRS1 interacting protein 1                                                                         |
| 6749 SSRP1      | structure specific recognition protein 1                                                                    |
| 5430 POLR2A     | polymerase (RNA) II (DNA directed) polypeptide A, 220kDa                                                    |
| 2968 GTF2H4     | general transcription factor IIH, polypeptide 4, 52kDa                                                      |
| 2957 GTF2A1     | general transcription factor IIA, 1, 19/37kDa                                                               |
| 3601 IL15RA     | interleukin 15 receptor, alpha                                                                              |
| 1271 CNFR       | ciliary neurotrophic factor receptor                                                                        |
| 25998 IBTK      | inhibitor of Bruton agammaglobulinemia tyrosine kinase                                                      |
| 9467 SH3BP5     | SH3-domain binding protein 5 (BTK-associated)                                                               |
| 604 BCL6        | B-cell CLL/lymphoma 6                                                                                       |
| 7070 THY1       | Thy-1 cell surface antigen                                                                                  |
| 2011 MARK2      | MAP/microtubule affinity-regulating kinase 2                                                                |
| 200186 CRTC2    | CREB regulated transcription coactivator 2                                                                  |
| 2118 ETV4       | ets variant 4                                                                                               |
| 57787 MARK4     | MAP/microtubule affinity-regulating kinase 4                                                                |
| 84446 BRSK1     | BR serine/threonine kinase 1                                                                                |
| 27347 STK39     | serine threonine kinase 39                                                                                  |
| 7182 NR2C2      | nuclear receptor subfamily 2, group C, member 2                                                             |
| 2520 GAST       | gastrin                                                                                                     |
| 2150 F2RL1      | coagulation factor II (thrombin) receptor-like 1                                                            |
| 84634 KISS1R    | KISS1 receptor                                                                                              |
| 7200 TRH        | thyrotropin-releasing hormone                                                                               |
| 6753 SSTR3      | somatostatin receptor 3                                                                                     |
| 8811 GALR2      | galanin receptor 2                                                                                          |
| 134 ADORA1      | adenosine A1 receptor                                                                                       |
| 2918 GRM8       | glutamate receptor, metabotropic 8                                                                          |
| 27115 PDE7B     | phosphodiesterase 7B                                                                                        |
| 84152 PPP1R1B   | protein phosphatase 1, regulatory (inhibitor) subunit 1B                                                    |
| 6000 RGS7       | regulator of G-protein signaling 7                                                                          |
| 1003 CDHS       | cadherin 5, type 2 (vascular endothelium)                                                                   |
| 9748 SLK        | STE20-like kinase                                                                                           |
| 1394 CRRH1      | corticotropin releasing hormone receptor 1                                                                  |
| 2895 GRID2      | glutamate receptor, ionotropic, delta 2                                                                     |
| 182 JAG1        | jagged 1                                                                                                    |
| 6184 RPN1       | ribophorin I                                                                                                |
| 6185 RPN2       | ribophorin II                                                                                               |
| 6480 ST6GAL1    | ST6 beta-galactosamide alpha-2,6-sialyltransferase 1                                                        |
| 4249 MGAT5      | mannosyl (alpha-1,6)-glycoprotein beta-1,6-N-acetylglucosaminyltransferase                                  |
| 10195 ALG3      | asparagine-linked glycosylation 3, alpha-1,3- mannosyltransferase homolog (S. cerevisiae)                   |
| 4121 MAN1A1     | mannosidase, alpha, class 1A, member 1                                                                      |
| 3703 STT3A      | STT3, subunit of the oligosaccharyltransferase complex, homolog A (S. cerevisiae)                           |
| 7991 TUSC3      | tumor suppressor candidate 3                                                                                |
| 4351 MPI        | mannose phosphate isomerase                                                                                 |
| 9945 GFPT2      | glutamine-fructose-6-phosphate transaminase 2                                                               |
| 64841 GNPAT1    | glucosamine-phosphate N-acetyltransferase 1                                                                 |
| 2290 FOXG1      | forkhead box G1                                                                                             |
| 54512 EXOSC4    | exosome component 4                                                                                         |
| 8125 ANP32A     | acidic (leucine-rich) nuclear phosphoprotein 32 family, member A                                            |
| 23671 TMEFF2    | transmembrane protein with EGF-like and two follistatin-like domains 2                                      |
| 24146 CLDN15    | claudin 15                                                                                                  |
| 64398 MPP5      | membrane protein, palmitoylated 5 (MAGUK p55 subfamily member 5)                                            |
| 1006 CDH8       | cadherin 8, type 2                                                                                          |
| 1008 CDH10      | cadherin 10, type 2 (T2-cadherin)                                                                           |
| 7016 TESK1      | testis-specific kinase 1                                                                                    |
| 4868 NPHS1      | nephrosis 1, congenital, Finnish type (nephrin)                                                             |
| 81617 CAB39L    | calcium binding protein 39-like                                                                             |
| 10642 IGF2BP1   | insulin-like growth factor 2 mRNA binding protein 1                                                         |
| 9451 EIF2AK3    | eukaryotic translation initiation factor 2-alpha kinase 3                                                   |
| 2081 ERN1       | endoplasmic reticulum to nucleus signaling 1                                                                |
| 2137 EXTL3      | exostosins (multiple)-like 3                                                                                |
| 11015 KDELR3    | KDEL (Lys-Asp-Glu-Leu) endoplasmic reticulum protein retention receptor 3                                   |
| 10525 HYOU1     | hypoxia up-regulated 1                                                                                      |
| 10643 IGF2BP3   | insulin-like growth factor 2 mRNA binding protein 3                                                         |
| 667 DST         | dystonin                                                                                                    |
| 7022 TFAP2C     | transcription factor AP-2 gamma (activating enhancer binding protein 2 gamma)                               |
| 137075 CLDN23   | claudin 23                                                                                                  |
| 260425 MAGI3    | membrane associated guanylate kinase, WW and PDZ domain containing 3                                        |
| 2037 EPB41L2    | erythrocyte membrane protein band 4.1-like 2                                                                |
| 5872 RAB13      | RAB13, member RAS oncogene family                                                                           |
| 9223 MAGI1      | membrane associated guanylate kinase, WW and PDZ domain containing 1                                        |
| 10921 RNPS1     | RNA binding protein S1, serine-rich domain                                                                  |
| 57819 LSM2      | LSM2 homolog, U6 small nuclear RNA associated (S. cerevisiae)                                               |
| 6628 SNRPB      | small nuclear ribonucleoprotein polypeptides B and B1                                                       |
| 6634 SNRPD3     | small nuclear ribonucleoprotein D3 polypeptide 18kDa                                                        |
| 8106 PABPN1     | poly(A) binding protein, nuclear 1                                                                          |
| 10250 SRRM1     | serine/arginine repetitive matrix 1                                                                         |
| 10992 SF3B2     | splicing factor 3b, subunit 2, 145kDa                                                                       |
| 9343 EFTUD2     | elongation factor Tu GTP binding domain containing 2                                                        |
| 10946 SF3A3     | splicing factor 3a, subunit 3, 60kDa                                                                        |
| 10421 CD2BP2    | CD2 (cytoplasmic tail) binding protein 2                                                                    |
| 2521 FUS        | fused in sarcoma                                                                                            |
| 3181 HNRNPA2B1  | heterogeneous nuclear ribonucleoprotein A2/B1                                                               |
| 3191 HNRNPL     | heterogeneous nuclear ribonucleoprotein L                                                                   |
| 7884 SLPB       | stem-loop binding protein                                                                                   |
| 339 APOBEC1     | apolipoprotein B mRNA editing enzyme, catalytic polypeptide 1                                               |
| 7284 TUFM       | Tu translation elongation factor, mitochondrial                                                             |
| 5376 PMP22      | peripheral myelin protein 22                                                                                |
| 3090 HIC1       | hypermethylated in cancer 1                                                                                 |
| 599 BCL2L2      | BCL2-like 2                                                                                                 |
| 639 PRDM1       | PR domain containing 1, with ZNF domain                                                                     |
| 3921 RPSA       | ribosomal protein SA                                                                                        |
| 6129 RPL7       | ribosomal protein L7                                                                                        |
| 6136 RPL12      | ribosomal protein L12                                                                                       |
| 6141 RPL18      | ribosomal protein L18                                                                                       |
| 6168 RPL37A     | ribosomal protein L37a                                                                                      |
| 6171 RPL41      | ribosomal protein L41                                                                                       |
| 2107 ETF1       | eukaryotic translation termination factor 1                                                                 |
| 23381 SMG5      | smg-5 homolog, nonsense mediated mRNA decay factor (C. elegans)                                             |
| 4850 CNOT4      | CCR4-NOT transcription complex, subunit 4                                                                   |
| 221178 SPATA13  | spermatogenesis associated 13                                                                               |
| 29071 C1GALT1C1 | C1GALT1-specific chaperone 1                                                                                |
| 23556 PIGN      | phosphatidylinositol glycan anchor biosynthesis, class N                                                    |
| 8733 GPAA1      | glycosylphosphatidylinositol anchor attachment protein 1 homolog (yeast)                                    |
| 10452 TOMM40    | translocase of outer mitochondrial membrane 40 homolog (yeast)                                              |
| 7203 CTF3       | chaperonin containing TCP1, subunit 3 (gamma)                                                               |
| 63971 KIF13A    | kinesin family member 13A                                                                                   |
| 50 ACO2         | aconitase 2, mitochondrial                                                                                  |
| 3313 HSPA9      | heat shock 70kDa protein 9 (mortalin)                                                                       |
| 6730 SRP68      | signal recognition particle 68kDa                                                                           |

|                 |                                                                                                     |
|-----------------|-----------------------------------------------------------------------------------------------------|
| 8667 EIF3H      | eukaryotic translation initiation factor 3, subunit H                                               |
| 10063 COX17     | COX17 cytochrome c oxidase assembly homolog (S. cerevisiae)                                         |
| 1351 COX8A      | cytochrome c oxidase subunit VIII (ubiquitous)                                                      |
| 4695 NDUFA2     | NADH dehydrogenase (ubiquinone) 1 alpha subcomplex, 2, 8kDa                                         |
| 4704 NDUFA9     | NADH dehydrogenase (ubiquinone) 1 alpha subcomplex, 9, 39kDa                                        |
| 1742 DLG4       | discs, large homolog 4 (Drosophila)                                                                 |
| 146754 DNAH2    | dynein, axonemal, heavy chain 2                                                                     |
| 7802 DNALI1     | dynein, axonemal, light intermediate chain 1                                                        |
| 30009 TBX21     | T-box 21                                                                                            |
| 51111 SUV420H1  | suppressor of variegation 4-20 homolog 1 (Drosophila)                                               |
| 2289 FKBP5      | FK506 binding protein 5                                                                             |
| 55504 TNFRSF19  | tumor necrosis factor receptor superfamily, member 19                                               |
| 23085 ERC1      | ELKS/RAB6-interacting/CAST family member 1                                                          |
| 7335 UBE2V1     | ubiquitin-conjugating enzyme E2 variant 1                                                           |
| 4744 NEFH       | neurofilament, heavy polypeptide                                                                    |
| 5630 PRPH       | peripherin                                                                                          |
| 79139 DRL1      | Der1-like domain family, member 1                                                                   |
| 1628 DBP        | D site of albumin promoter (albumin D-box) binding protein                                          |
| 56938 ARNTL2    | aryl hydrocarbon receptor nuclear translocator-like 2                                               |
| 2665 GDI2       | GDP dissociation inhibitor 2                                                                        |
| 257106 ARHGAP30 | Rho GTPase activating protein 30                                                                    |
| 83478 ARHGAP24  | Rho GTPase activating protein 24                                                                    |
| 9411 ARHGAP29   | Rho GTPase activating protein 29                                                                    |
| 93185 IGSF8     | immunoglobulin superfamily, member 8                                                                |
| 196403 DTX3     | deltex homolog 3 (Drosophila)                                                                       |
| 1960 EGR3       | early growth response 3                                                                             |
| 2635 GBP3       | guanylate binding protein 3                                                                         |
| 5796 PTPRK      | protein tyrosine phosphatase, receptor type, K                                                      |
| 1600 DAB1       | disabled homolog 1 (Drosophila)                                                                     |
| 7391 USF1       | upstream transcription factor 1                                                                     |
| 55816 DOK5      | docking protein 5                                                                                   |
| 9260 PDLIM7     | PDZ and LIM domain 7 (enigma)                                                                       |
| 51582 AZIN1     | antizyme inhibitor 1                                                                                |
| 22809 ATF5      | activating transcription factor 5                                                                   |
| 8073 PTP4A2     | protein tyrosine phosphatase type IVA, member 2                                                     |
| 6801 STRN       | striatin, calmodulin binding protein                                                                |
| 4311 MME        | membrane metallo-endopeptidase                                                                      |
| 23621 BACE1     | beta-site APP-cleaving enzyme 1                                                                     |
| 8320 EOMES      | eomesodermin                                                                                        |
| 4942 OAT        | ornithine aminotransferase                                                                          |
| 51074 APIP      | APAF1 interacting protein                                                                           |
| 58478 ENOPH1    | enolase-phosphatase 1                                                                               |
| 7263 TST        | thiosulfate sulfurtransferase (rhodanese)                                                           |
| 549 AUH         | AU RNA binding protein/enoyl-CoA hydratase                                                          |
| 1644 DDC        | dopa decarboxylase (aromatic L-amino acid decarboxylase)                                            |
| 5092 PCB1       | pterin-4 alpha-carbinolamine dehydratase/dimerization cofactor of hepatocyte nuclear factor 1 alpha |
| 3778 KCNMA1     | potassium large conductance calcium-activated channel, subfamily M, alpha member 1                  |
| 6418 SET        | SET nuclear oncogene                                                                                |
| 135112 NCOA7    | nuclear receptor coactivator 7                                                                      |
| 2120 ETV6       | ets variant 6                                                                                       |
| 84501 SPIRE2    | spire homolog 2 (Drosophila)                                                                        |
| 55902 ACSS2     | acyl-CoA synthetase short-chain family member 2                                                     |
| 3206 HOXA10     | homeobox A10                                                                                        |
| 5049 PAFAH1B2   | platelet-activating factor acetylhydrolase 1b, catalytic subunit 2 (30kDa)                          |
| 5050 PAFAH1B3   | platelet-activating factor acetylhydrolase 1b, catalytic subunit 3 (29kDa)                          |
| 1827 RCAN1      | regulator of calcineurin 1                                                                          |
| 429 ASCL1       | achaete-scute complex homolog 1 (Drosophila)                                                        |
| 2175 FANCA      | Fanconi anemia, complementation group A                                                             |
| 2130 EWSR1      | Ewing sarcoma breakpoint region 1                                                                   |
| 7462 LAT2       | linker for activation of T cells family, member 2                                                   |
| 27131 SNX5      | sorting nexin 5                                                                                     |
| 7163 TPD52      | tumor protein D52                                                                                   |
| 8729 GBF1       | golgi brefeldin A resistant guanine nucleotide exchange factor 1                                    |
| 2706 GJB2       | gap junction protein, beta 2, 26kDa                                                                 |
| 51728 POLR3K    | polymerase (RNA) III (DNA directed) polypeptide K, 12.3 kDa                                         |
| 84265 POLR3GL   | polymerase (RNA) III (DNA directed) polypeptide G (32kD)-like                                       |
| 4781 NFIB       | nuclear factor I/B                                                                                  |
| 10302 SNAPC5    | small nuclear RNA activating complex, polypeptide 5, 19kDa                                          |
| 6618 SNAPC2     | small nuclear RNA activating complex, polypeptide 2, 45kDa                                          |
| 284119 PTRF     | polymerase I and transcript release factor                                                          |
| 11335 CBX3      | chromobox homolog 3                                                                                 |
| 9310 ZNF235     | zinc finger protein 235                                                                             |
| 8861 LDB1       | LIM domain binding 1                                                                                |
| 2119 ETV5       | ets variant 5                                                                                       |
| 7351 UCP2       | uncoupling protein 2 (mitochondrial, proton carrier)                                                |
| 5147 PDE6D      | phosphodiesterase 6D, cGMP-specific, rod, delta                                                     |
| 9615 GDA        | guanine deaminase                                                                                   |
| 5141 PDE4A      | phosphodiesterase 4A, cAMP-specific                                                                 |
| 58497 PRUNE     | prune homolog (Drosophila)                                                                          |
| 10380 BPNT1     | 3'(2'), 5'-bisphosphate nucleotidase 1                                                              |
| 80854 SETD7     | SET domain containing (lysine methyltransferase) 7                                                  |
| 10690 FUT9      | fucosyltransferase 9 (alpha (1,3) fucosyltransferase)                                               |
| 2651 GCNT2      | glucosaminyl (N-acetyl) transferase 2, l-branching enzyme (I blood group)                           |
| 6484 ST3GAL4    | ST3 beta-galactoside alpha-2,3-sialyltransferase 4                                                  |
| 252983 STXBPA4  | syntaxin binding protein 4                                                                          |
| 1876 E2F6       | E2F transcription factor 6                                                                          |
| 3945 LDHB       | lactate dehydrogenase B                                                                             |
| 1737 DLAT       | dihydropyrimidine 5-acetyltransferase                                                               |
| 8625 RFXANK     | regulatory factor X-associated ankyrin-containing protein                                           |
| 6892 TAPBP      | TAP binding protein (tapasin)                                                                       |
| 57863 CADM3     | cell adhesion molecule 3                                                                            |
| 9378 NRXN1      | neurexin 1                                                                                          |
| 7156 TOP3A      | topoisomerase (DNA) III alpha                                                                       |
| 80198 MUS81     | MUS81 endonuclease homolog (S. cerevisiae)                                                          |
| 8438 RAD54L     | RAD54-like (S. cerevisiae)                                                                          |
| 8940 TOP3B      | topoisomerase (DNA) III beta                                                                        |
| 2305 FOXM1      | forkhead box M1                                                                                     |
| 53615 MBD3      | methyl-CpG binding domain protein 3                                                                 |
| 1108 CHD4       | chromodomain helicase DNA binding protein 4                                                         |
| 23409 SIRT4     | sirtuin 4                                                                                           |
| 57459 GATAD2B   | GATA zinc finger domain containing 2B                                                               |
| 9219 MTA2       | metastasis associated 1 family, member 2                                                            |
| 112483 SAT2     | spermidine/spermine N1-acetyltransferase family member 2                                            |
| 29920 PYCR2     | pyrroline-5-carboxylate reductase family, member 2                                                  |
| 9562 MINPP1     | multiple inositol-polyphosphate phosphatase 1                                                       |
| 8930 MBD4       | methyl-CpG binding domain protein 4                                                                 |
| 3980 LIG3       | ligase III, DNA, ATP-dependent                                                                      |
| 5429 POLH       | polymerase (DNA directed), eta                                                                      |
| 5980 REV3L      | REV3-like, catalytic subunit of DNA polymerase zeta (yeast)                                         |
| 6319 SCD        | stearoyl-CoA desaturase (delta-9-desaturase)                                                        |
| 2170 FABP3      | fatty acid binding protein 3, muscle and heart (mammary-derived growth inhibitor)                   |
| 7316 UBC        | ubiquitin C                                                                                         |
| 10020 GNE       | glucosamine (UDP-N-acetyl)-2-epimerase/N-acetylmannosamine kinase                                   |
| 4774 NFIA       | nuclear factor I/A                                                                                  |
| 9627 SNCAIP     | synuclein, alpha interacting protein                                                                |
| 51399 TRAPPC4   | trafficking protein particle complex 4                                                              |
| 3145 HMBS       | hydroxymethylbilane synthase                                                                        |
| 5498 PPOX       | protoporphyrinogen oxidase                                                                          |
| 951 CD37        | CD37 molecule                                                                                       |
| 558 AXL         | AXL receptor tyrosine kinase                                                                        |
| 4661 MYT1       | myelin transcription factor 1                                                                       |
| 53 ACP2         | acid phosphatase 2, lysosomal                                                                       |
| 10947 AP3M2     | adaptor-related protein complex 3, mu 2 subunit                                                     |
| 11154 AP4S1     | adaptor-related protein complex 4, sigma 1 subunit                                                  |
| 130340 AP1S3    | adaptor-related protein complex 1, sigma 3 subunit                                                  |
| 26088 GGA1      | golgi-associated, gamma adaptin ear containing, ARF binding protein 1                               |
| 7805 LAPTM5     | lysosomal protein transmembrane 5                                                                   |
| 9179 AP4M1      | adaptor-related protein complex 4, mu 1 subunit                                                     |
| 9741 LAPTM4A    | lysosomal protein transmembrane 4 alpha                                                             |
| 7402 UTRN       | utrophin                                                                                            |
| 2969 GTF2I      | general transcription factor Iii                                                                    |
| 6879 TAF7       | TAF7 RNA polymerase II, TATA box binding protein (TBP)-associated factor, 55kDa                     |
| 9569 GTF2IRD1   | GTF2I repeat domain containing 1                                                                    |
| 8993 PGLYRP1    | peptidoglycan recognition protein 1                                                                 |
| 2135 EXTL2      | exostosins (multiple)-like 2                                                                        |
| 10791 VAMP5     | vesicle-associated membrane protein 5 (myobrevin)                                                   |
| 53407 STX18     | syntaxin 18                                                                                         |
| 9342 SNAP29     | synaptosomal-associated protein, 29kDa                                                              |
| 151903 CCDC12   | coiled-coil domain containing 12                                                                    |
| 55119 PRPF38B   | PRP38 pre-mRNA processing factor 38 (yeast) domain containing B                                     |
| 8567 MADD       | MAP-kinase activating death domain                                                                  |
| 84823 LMNB2     | lamin B2                                                                                            |
| 6909 TBX2       | T-box 2                                                                                             |
| 181 AGRP        | agouti related protein homolog (mouse)                                                              |
| 6646 SOAT1      | sterol O-acyltransferase 1                                                                          |
| 57504 MTA3      | metastasis associated 1 family, member 3                                                            |
| 30851 TAX1BP3   | Tax1 (human T-cell leukemia virus type I) binding protein 3                                         |
| 4662 SHBG       | sex hormone-binding globulin                                                                        |
| 10460 TACC3     | transforming, acidic coiled-coil containing protein 3                                               |
| 23424 TDRD7     | tudor domain containing 7                                                                           |
| 9962 SLC22A2    | solute carrier family 23 (nucleobase transporters), member 2                                        |
| 55215 FANCI     | Fanconi anemia, complementation group I                                                             |
| 6916 TBXAS1     | thromboxane A synthase 1 (platelet)                                                                 |
| 4635 MYL4       | myosin, light chain 4, alkali; atrial, embryonic                                                    |
| 9388 LIPG       | lipase, endothelial                                                                                 |
| 7407 VARS       | valyl-tRNA synthetase                                                                               |
| 16 AARS         | alanyl-tRNA synthetase                                                                              |
| 2193 FARSA      | phenylalanyl-tRNA synthetase, alpha subunit                                                         |
| 833 CARS        | cysteinyl-tRNA synthetase                                                                           |
| 58528 RRAGD     | Ras-related GTP binding D                                                                           |
| 8536 CAMK1      | calcium/calmodulin-dependent protein kinase I                                                       |
| 9755 TBKBP1     | TBK1 binding protein 1                                                                              |
| 239 ALOX12      | arachidonate 12-lipoxygenase                                                                        |
| 4048 LTA4H      | leukotriene A4 hydrolase                                                                            |
| 246175 CNOT6L   | CCR4-NOT transcription complex, subunit 6-like                                                      |
| 5826 ABCD4      | ATP-binding cassette, sub-family D (ALD), member 4                                                  |
| 22 ABCB7        | ATP-binding cassette, sub-family B (MDR/TAP), member 7                                              |
| 89845 ABCC10    | ATP-binding cassette, sub-family C (CFTR/MRP), member 10                                            |
| 51268 PIPOX     | pipecolic acid oxidase                                                                              |
| 5190 PEX6       | peroxisomal biogenesis factor 6                                                                     |
| 5194 PEX13      | peroxisomal biogenesis factor 13                                                                    |
| 9409 PEX16      | peroxisomal biogenesis factor 16                                                                    |
| 2117 ETV3       | ets variant 3                                                                                       |
| 7378 UPP1       | uridine phosphorylase 1                                                                             |
| 1785 DNMT3B     | DNA (cytosine-5-)-methyltransferase 3 beta                                                          |
| 79178 THTPA     | thiamine triphosphatase                                                                             |
| 3301 DNAJA1     | DnaJ (Hsp40) homolog, subfamily A, member 1                                                         |

|           |              |                                                                                                 |
|-----------|--------------|-------------------------------------------------------------------------------------------------|
| 654817    | NCF1C        | neutrophil cytosolic factor 1C pseudogene                                                       |
| 11231     | SEC63        | SEC63 homolog (S. cerevisiae)                                                                   |
| 2739      | GLO1         | glyoxalase 1                                                                                    |
| 55766     | H2AFJ        | H2A histone family, member J                                                                    |
| 9563      | H6PD         | hexose-6-phosphate dehydrogenase (glucose 1-dehydrogenase)                                      |
| 6817      | SULT1A1      | sulfotransferase family, cytosolic, 1A, phenol-preferring, member 1                             |
| 8869      | ST3GALS      | ST3 beta-galactoside alpha-2,3-sialyltransferase 5                                              |
| 79947     | DHDDS        | dehydrodichyl diphosphate synthase                                                              |
| 120892    | LRRK2        | leucine-rich repeat kinase 2                                                                    |
| 27429     | HTRA2        | HtrA serine peptidase 2                                                                         |
| 283209    | PGM2L1       | phosphoglucomutase 2-like 1                                                                     |
| 602       | BCL3         | B-cell CLL/lymphoma 3                                                                           |
| 3543      | IGLL1        | immunoglobulin lambda-like polypeptide 1                                                        |
| 11337     | GABARAP      | GABA(A) receptor-associated protein                                                             |
| 11345     | GABARAPL2    | GABA(A) receptor-associated protein-like 2                                                      |
| 64422     | ATG3         | ATG3 autophagy related 3 homolog (S. cerevisiae)                                                |
| 4439      | MSH5         | mutS homolog 5 (E. coli)                                                                        |
| 51070     | NOSIP        | nitric oxide synthase interacting protein                                                       |
| 2941      | GSTA4        | glutathione S-transferase alpha 4                                                               |
| 5886      | RAD23A       | RAD23 homolog A (S. cerevisiae)                                                                 |
| 131965    | METTL6       | methyltransferase like 6                                                                        |
| 157506    | RDH10        | retinol dehydrogenase 10 (all-trans)                                                            |
| 5480      | APTX         | aprotaxin                                                                                       |
| 7155      | TOP2B        | topoisomerase (DNA) II beta 180kDa                                                              |
| 100271849 | MEF2B        | myocyte enhancer factor 2B                                                                      |
| 100505576 | LOC100505576 | uncharacterized LOC100505576                                                                    |
| 10061     | ABCF2        | ATP-binding cassette, sub-family F (GCN20), member 2                                            |
| 10067     | SCAMP3       | secretory carrier membrane protein 3                                                            |
| 10068     | IL18BP       | interleukin 18 binding protein                                                                  |
| 10114     | HIPK3        | homeodomain interacting protein kinase 3                                                        |
| 10180     | RBM6         | RNA binding motif protein 6                                                                     |
| 10184     | LHFPL2       | lipoma HMGIC fusion partner-like 2                                                              |
| 10198     | MPHOSPH9     | M-phase phosphoprotein 9                                                                        |
| 10205     | MPZL2        | myelin protein zero-like 2                                                                      |
| 10212     | DDX39A       | DEAD (Asp-Glu-Ala-Asp) box polypeptide 39A                                                      |
| 10237     | SLC35B1      | solute carrier family 35, member B1                                                             |
| 10290     | SPEG         | SPEG complex locus                                                                              |
| 10313     | RTN3         | reticulon 3                                                                                     |
| 10363     | HMG20A       | high mobility group 20A                                                                         |
| 10406     | WFDC2        | WAP four-disulfide core domain 2                                                                |
| 10420     | TESK2        | testis-specific kinase 2                                                                        |
| 10432     | RBM14        | RNA binding motif protein 14                                                                    |
| 10456     | HAX1         | HCLS1 associated protein X-1                                                                    |
| 10467     | ZNHIT1       | zinc finger, HIT-type containing 1                                                              |
| 10526     | IPO8         | importin 8                                                                                      |
| 10529     | NEBL         | nebulin                                                                                         |
| 10586     | MAB21L2      | mab-21-like 2 (C. elegans)                                                                      |
| 10607     | TBL3         | transducin (beta)-like 3                                                                        |
| 10615     | SPAG5        | sperm associated antigen 5                                                                      |
| 10620     | ARID3B       | AT rich interactive domain 3B (BRIGHT-like)                                                     |
| 10635     | RAD51AP1     | RAD51 associated protein 1                                                                      |
| 10657     | KHDRBS1      | KH domain containing, RNA binding, signal transduction associated 1                             |
| 10664     | CTCF         | CCCTC-binding factor (zinc finger protein)                                                      |
| 10693     | CCT6B        | chaperonin containing TCP1, subunit 6B (zeta 2)                                                 |
| 10730     | YME1L1       | YME1-like 1 (S. cerevisiae)                                                                     |
| 10743     | RAI1         | retinoic acid induced 1                                                                         |
| 10749     | KIF1C        | kinesin family member 1C                                                                        |
| 10763     | NES          | nestin                                                                                          |
| 10771     | ZMYND11      | zinc finger, MYND-type containing 11                                                            |
| 10809     | STAR10       | STAR-related lipid transfer (START) domain containing 10                                        |
| 10900     | RUNDC3A      | RUN domain containing 3A                                                                        |
| 10902     | BRD8         | bromodomain containing 8                                                                        |
| 10951     | CBX1         | chromobox homolog 1                                                                             |
| 10955     | SERINC3      | serine incorporator 3                                                                           |
| 10962     | MULT11       | myeloid/lymphoid or mixed-lineage leukemia (trithorax homolog, Drosophila); translocated to, 11 |
| 10980     | COP56        | COP9 constitutive photomorphogenic homolog subunit 6 (Arabidopsis)                              |
| 10982     | MAPRE2       | microtubule-associated protein, RP/EB family, member 2                                          |
| 11011     | TLK2         | tousled-like kinase 2                                                                           |
| 11030     | RBPMS        | RNA binding protein with multiple splicing                                                      |
| 1114      | CHGB         | chromogranin B (secretogranin 1)                                                                |
| 11142     | PKIG         | protein kinase (cAMP-dependent, catalytic) inhibitor gamma                                      |
| 11163     | NUDT4        | nudix (nucleoside diphosphate linked moiety X)-type motif 4                                     |
| 11217     | AKAP7        | A kinase (PRKA) anchor protein 2                                                                |
| 112616    | CRTM7        | CKLF-like MARVEL transmembrane domain containing 7                                              |
| 11269     | DDX19B       | DEAD (Asp-Glu-Ala-Asp) box polypeptide 19B                                                      |
| 113130    | CDC45        | cell division cycle associated 5                                                                |
| 113246    | C12orf57     | chromosome 12 open reading frame 57                                                             |
| 113277    | TMEM106A     | transmembrane protein 106A                                                                      |
| 11334     | TUSC2        | tumor suppressor candidate 2                                                                    |
| 114757    | CYGB         | cytoglobin                                                                                      |
| 114804    | RNF157       | ring finger protein 157                                                                         |
| 114883    | OSBPL9       | oxysterol binding protein-like 9                                                                |
| 114990    | VASN         | vasorin                                                                                         |
| 1153      | CIRBP        | cold inducible RNA binding protein                                                              |
| 116039    | OSR2         | odd-skipped related 2 (Drosophila)                                                              |
| 116238    | TLCD1        | TLC domain containing 1                                                                         |
| 116369    | SLC26A8      | solute carrier family 26, member 8                                                              |
| 116931    | MED12L       | mediator complex subunit 12-like                                                                |
| 117246    | FTSJ3        | FtsJ homolog 3 (E. coli)                                                                        |
| 117532    | TMC2         | transmembrane channel-like 2                                                                    |
| 1181      | CLCN2        | chloride channel 2                                                                              |
| 1182      | CLCN3        | chloride channel 3                                                                              |
| 118427    | OLFM3        | olfactomedin 3                                                                                  |
| 1187      | CLCNKA       | chloride channel Ka                                                                             |
| 1188      | CLCNKB       | chloride channel Kb                                                                             |
| 119710    | C11orf74     | chromosome 11 open reading frame 74                                                             |
| 120071    | GYTL1B       | glycosyltransferase-like 1B                                                                     |
| 121340    | SP7          | Sp7 transcription factor                                                                        |
| 123036    | TCN          | tandem C2 domains, nuclear                                                                      |
| 124641    | OVCA2        | ovarian tumor suppressor candidate 2                                                            |
| 124872    | BAGALNT2     | beta-1,4-N-acetyl-galactosaminyl transferase 2                                                  |
| 124925    | SEZ6         | seizure related 6 homolog (mouse)                                                               |
| 124995    | MRPL10       | mitochondrial ribosomal protein L10                                                             |
| 125488    | TTC39C       | tetratricopeptide repeat domain 39C                                                             |
| 1265      | CNN2         | calponin 2                                                                                      |
| 1267      | CNP          | 2',3'-cyclic nucleotide 3' phosphodiesterase                                                    |
| 127544    | RNF19B       | ring finger protein 19B                                                                         |
| 128553    | TSHZ2        | teashirt zinc finger homeobox 2                                                                 |
| 130271    | PLEKHH2      | pleckstrin homology domain containing, family H (with MYTH4 domain) member 2                    |
| 130497    | OSR1         | odd-skipped related 1 (Drosophila)                                                              |
| 130888    | FBXO36       | F-box protein 36                                                                                |
| 132014    | IL17RE       | interleukin 17 receptor E                                                                       |
| 132243    | H1FOO        | H1 histone family, member O, oocyte-specific                                                    |
| 136319    | MTPN         | myotrophin                                                                                      |
| 139886    | SPIN4        | spindlin family, member 4                                                                       |
| 141       | ADPRH        | ADP-ribosylarginine hydrolase                                                                   |
| 1410      | CRYAB        | crystallin, alpha B                                                                             |
| 144363    | LYRM5        | LYR motif containing 5                                                                          |
| 144404    | TMEM120B     | transmembrane protein 120B                                                                      |
| 146057    | TTBK2        | tau tubulin kinase 2                                                                            |
| 148281    | SYT6         | synaptotagmin VI                                                                                |
| 148979    | GLIS1        | GLIS family zinc finger 1                                                                       |
| 149111    | CNIH3        | cornichon homolog 3 (Drosophila)                                                                |
| 149603    | RNF187       | ring finger protein 187                                                                         |
| 149951    | COMMD7       | COMMD domain containing 7                                                                       |
| 1506      | CTRL         | chymotrypsin-like                                                                               |
| 151188    | ARL6IP6      | ADP-ribosylation-like factor 6 interacting protein 6                                            |
| 151987    | PPP4R2       | protein phosphatase 4, regulatory subunit 2                                                     |
| 152189    | CMTM8        | CKLF-like MARVEL transmembrane domain containing 8                                              |
| 152330    | CNTN4        | contactin 4                                                                                     |
| 160335    | TMTC2        | transmembrane and tetratricopeptide repeat containing 2                                         |
| 161291    | TMEM30B      | transmembrane protein 30B                                                                       |
| 161582    | DYX1C1       | dyslexia susceptibility 1 candidate 1                                                           |
| 162494    | RHBDL3       | rhomboid, veinlet-like 3 (Drosophila)                                                           |
| 162605    | KRT28        | keratin 28                                                                                      |
| 165545    | DQX1         | DEAQ box RNA-dependent ATPase 1                                                                 |
| 166378    | SPATA5       | spermatogenesis associated 5                                                                    |
| 170463    | SBPA         | single stranded DNA binding protein 4                                                           |
| 170961    | ANKRD24      | ankyrin repeat domain 24                                                                        |
| 171586    | ABHD3        | abhydrolase domain containing 3                                                                 |
| 1740      | DLG2         | discs, large homolog 2 (Drosophila)                                                             |
| 1747      | DLX3         | distal-less homeobox 3                                                                          |
| 1760      | DMPK         | dystrophin myotonia-protein kinase                                                              |
| 1776      | DNASE1L3     | deoxyribonuclease I-like 3                                                                      |
| 1804      | DPPE         | dipeptidyl-peptidase 6                                                                          |
| 1822      | ATN1         | atrophin 1                                                                                      |
| 1911      | PHC1         | polyhomeotic homolog 1 (Drosophila)                                                             |
| 1993      | ELAVL2       | ELAV (embryonic lethal, abnormal vision, Drosophila)-like 2 (Hu antigen B)                      |
| 1995      | ELAVL3       | ELAV (embryonic lethal, abnormal vision, Drosophila)-like 3 (Hu antigen C)                      |
| 199699    | DAND5        | DAN domain family, member 5                                                                     |
| 199746    | UZAF14       | UZ small nuclear RNA auxiliary factor 1-like 4                                                  |
| 200185    | KRTCAP2      | keratinocyte associated protein 2                                                               |
| 201191    | SAMD14       | sterile alpha motif domain containing 14                                                        |
| 201254    | STRA13       | stimulated by retinoic acid 13 homolog (mouse)                                                  |
| 2019      | EN1          | engrailed homeobox 1                                                                            |
| 2070      | EYA4         | eyes absent homolog 4 (Drosophila)                                                              |
| 2140      | EYA3         | eyes absent homolog 3 (Drosophila)                                                              |
| 2145      | EZH1         | enhancer of zeste homolog 1 (Drosophila)                                                        |
| 2186      | BPTF         | bromodomain PHD finger transcription factor                                                     |
| 221035    | REEP3        | receptor accessory protein 3                                                                    |
| 221184    | CPNE2        | copine II                                                                                       |
| 222068    | TMED4        | transmembrane emp24 protein transport domain containing 4                                       |
| 22807     | IKZF2        | IKAROS family zinc finger 2 (Helios)                                                            |
| 2281      | FKBP1B       | FK506 binding protein 1B, 12.6 kDa                                                              |
| 22839     | DLGAP4       | discs, large (Drosophila) homolog-associated protein 4                                          |
| 22858     | ICK          | intestinal cell (MAK-like) kinase                                                               |
| 22883     | CLSTN1       | calsyntenin 1                                                                                   |
| 22902     | RUFY3        | RUN and FYVE domain containing 3                                                                |
| 22906     | TRAK1        | trafficking protein, kinesin binding 1                                                          |
| 22913     | RALY         | RNA binding protein, autoantigenic (hnRNP-associated with lethal yellow homolog (mouse))        |
| 22941     | SHANK2       | SH3 and multiple ankyrin repeat domains 2                                                       |
| 2297      | FOXDI        | forkhead box D1                                                                                 |
| 22983     | MAST1        | microtubule associated serine/threonine kinase 1                                                |
| 22990     | PCNX         | pecanex homolog (Drosophila)                                                                    |
| 23        | ABCF1        | ATP-binding cassette, sub-family F (GCN20), member 1                                            |
| 23024     | PDZRN3       | PDZ domain containing ring finger 3                                                             |
| 23025     | UNC13A       | unc-13 homolog A (C. elegans)                                                                   |

|                  |                                                                                      |
|------------------|--------------------------------------------------------------------------------------|
| 2303 FOXG2       | forkhead box C2 (MFH-1, mesenchyme forkhead 1)                                       |
| 23034 SAMD4A     | sterile alpha motif domain containing 4A                                             |
| 23076 RRP1B      | ribosomal RNA processing 1 homolog B (S. cerevisiae)                                 |
| 23082 PPRC1      | peroxisome proliferator-activated receptor gamma, coactivator-related 1              |
| 23095 KIF1B      | kinesin family member 1B                                                             |
| 23130 ATG2A      | ATG2 autophagy related 2 homolog A (S. cerevisiae)                                   |
| 23142 DCUN1D4    | DCN1, defective in cullin neddylation 1, domain containing 4 (S. cerevisiae)         |
| 23150 FRMD4B     | FERM domain containing 4B                                                            |
| 23152 CIC        | capicua homolog (Drosophila)                                                         |
| 23154 NCDN       | neurochondrin                                                                        |
| 23179 RGL1       | ral guanine nucleotide dissociation stimulator-like 1                                |
| 23184 MESDC2     | mesoderm development candidate 2                                                     |
| 23187 PHLD1      | pleckstrin homology-like domain, family B, member 1                                  |
| 23210 JMJD6      | jumonji domain containing 6                                                          |
| 23212 RRS1       | RRS1 ribosome biogenesis regulator homolog (S. cerevisiae)                           |
| 23216 TBC1D1     | TBC1 (tre-2/USP6, BUB2, cdc16) domain family, member 1                               |
| 23228 PLCL2      | phospholipase C-like 2                                                               |
| 23269 MGA        | MAX gene associated                                                                  |
| 23321 TRIM2      | tripartite motif containing 2                                                        |
| 23328 SASH1      | SAM and SH3 domain containing 1                                                      |
| 23406 COTL1      | coactosin-like 1 (Dictyostelium)                                                     |
| 2342 FNTB        | farnesyltransferase, CAAX box, beta                                                  |
| 23435 TARDBP     | TAR DNA binding protein                                                              |
| 23512 SUZ12      | suppressor of zeste 12 homolog (Drosophila)                                          |
| 23536 ADAT1      | adenosine deaminase, tRNA-specific 1                                                 |
| 23554 TSPAN12    | tetraspanin 12                                                                       |
| 23564 DDAH2      | dimethylarginine dimethylaminohydrolase 2                                            |
| 23567 ZNF346     | zinc finger protein 346                                                              |
| 23584 VSIG2      | V-set and immunoglobulin domain containing 2                                         |
| 23637 RABGAP1    | RAB GTPase activating protein 1                                                      |
| 23639 LRRC6      | leucine rich repeat containing 6                                                     |
| 23648 SSBP3      | single stranded DNA binding protein 3                                                |
| 23678 SGK3       | serum/glucocorticoid regulated kinase family, member 3                               |
| 23788 MTCH2      | mitochondrial carrier 2                                                              |
| 238 ALK          | anaplastic lymphoma receptor tyrosine kinase                                         |
| 253738 EBF3      | early B-cell factor 3                                                                |
| 254102 EHBPI1L1  | EH domain binding protein 1-like 1                                                   |
| 254240 BP1FC     | BP1 fold containing family C                                                         |
| 254394 MCM9      | minichromosome maintenance complex component 9                                       |
| 255061 TAC4      | tachykinin 4 (hemokinin)                                                             |
| 25797 PQCT       | glutamyl-peptide cyclotransferase                                                    |
| 25801 GCA        | grancalcin, EF-hand calcium binding protein                                          |
| 25806 VAX2       | ventral anterior homeobox 2                                                          |
| 25807 RHBDD3     | rhomboid domain containing 3                                                         |
| 25816 TNFAIP8    | tumor necrosis factor, alpha-induced protein 8                                       |
| 25842 ASF1A      | ASF1 anti-silencing function 1 homolog A (S. cerevisiae)                             |
| 25917 THUMP3     | THUMP domain containing 3                                                            |
| 25925 ZNF521     | zinc finger protein 521                                                              |
| 25979 DHRS7B     | dehydrogenase/reductase (SDR family) member 7B                                       |
| 26002 MOXD1      | monooxygenase, DBH-like 1                                                            |
| 26022 TMEM98     | transmembrane protein 98                                                             |
| 26053 AUTS2      | autism susceptibility candidate 2                                                    |
| 26057 ANKRD17    | ankyrin repeat domain 17                                                             |
| 26140 TTL3       | tubulin tyrosine ligase-like family, member 3                                        |
| 261729 STEAP2    | STEAP family member 2, metalloredoxase                                               |
| 26207 PITPNC1    | phosphatidylinositol transfer protein, cytoplasmic 1                                 |
| 2622 GAS8        | growth arrest-specific 8                                                             |
| 26268 FBX09      | F-box protein 9                                                                      |
| 26284 ERAL1      | Era G-protein-like 1 (E. coli)                                                       |
| 2637 GBX2        | gastrulation brain homeobox 2                                                        |
| 26469 PTPN18     | protein tyrosine phosphatase, non-receptor type 18 (brain-derived)                   |
| 26499 PLEK2      | pleckstrin 2                                                                         |
| 26512 INTS6      | integrator complex subunit 6                                                         |
| 266743 NPAS4     | neuronal PAS domain protein 4                                                        |
| 26960 NBEA       | neurobeachin                                                                         |
| 27000 DNAJC2     | Dnaj (Hsp40) homolog, subfamily C, member 2                                          |
| 27022 FOXD3      | forkhead box D3                                                                      |
| 27075 TSPAN13    | tetraspanin 13                                                                       |
| 27077 B9D1       | B9 protein domain 1                                                                  |
| 27095 TRAPPC3    | trafficking protein particle complex 3                                               |
| 27129 HSPB7      | heat shock 27kDa protein family, member 7 (cardiovascular)                           |
| 27239 GPR162     | G protein-coupled receptor 162                                                       |
| 27240 SIT1       | signaling threshold regulating transmembrane adaptor 1                               |
| 27245 AHDC1      | AT hook, DNA binding motif, containing 1                                             |
| 27247 NFL1       | NFL1 iron-sulfur cluster scaffold homolog (S. cerevisiae)                            |
| 27440 CCCR5      | cat eye syndrome chromosome region, candidate 5                                      |
| 283578 TMED8     | transmembrane emp24 protein transport domain containing 8                            |
| 283659 PRTG      | protogenin                                                                           |
| 284086 NEK8      | NIMA (never in mitosis gene a)-related kinase 8                                      |
| 284406 ZFP82     | zinc finger protein 82 homolog (mouse)                                               |
| 284434 NWD1      | NACT and WD repeat domain containing 1                                               |
| 284612 SYPL2     | synaptophysin-like 2                                                                 |
| 285382 C3orf70   | chromosome 3 open reading frame 70                                                   |
| 2873 GPS1        | G protein pathway suppressor 1                                                       |
| 28981 IFT81      | intraflagellar transport 81 homolog (Chlamydomonas)                                  |
| 28985 MCTS1      | malignant T cell amplified sequence 1                                                |
| 28991 COMMD5     | COMMD domain containing 5                                                            |
| 29105 C16orf80   | chromosome 16 open reading frame 80                                                  |
| 29789 OLA1       | Obg-like ATPase 1                                                                    |
| 29855 UBN1       | ubiquitin 1                                                                          |
| 29903 CCD106     | coiled-coil domain containing 106                                                    |
| 29911 HOOK2      | hook homolog 2 (Drosophila)                                                          |
| 29943 PADI1      | peptidyl arginine deiminase, type 1                                                  |
| 29966 STRN3      | striatin, calmodulin binding protein 3                                               |
| 29978 UBQLN2     | ubiquilin 2                                                                          |
| 29980 DONSON     | downstream neighbor of SON                                                           |
| 30010 NXPH1      | neurexophilin 1                                                                      |
| 3069 HDLBP       | high density lipoprotein binding protein                                             |
| 30820 CDRN1P     | Kv channel interacting protein 1                                                     |
| 30850 CDR2L      | cerebellar degeneration-related protein 2-like                                       |
| 3131 HLF         | hepatic leukemia factor                                                              |
| 3140 MR1         | major histocompatibility complex, class I-related                                    |
| 3199 HOXA2       | homeobox A2                                                                          |
| 3205 HOXA9       | homeobox A9                                                                          |
| 3219 HOXB9       | homeobox B9                                                                          |
| 3221 HOXC4       | homeobox C4                                                                          |
| 3222 HOXC5       | homeobox C5                                                                          |
| 3223 HOXC6       | homeobox C6                                                                          |
| 3224 HOXC8       | homeobox C8                                                                          |
| 3225 HOXC9       | homeobox C9                                                                          |
| 3231 HOXD1       | homeobox D1                                                                          |
| 3232 HOXD3       | homeobox D3                                                                          |
| 3234 HOXD8       | homeobox D8                                                                          |
| 3235 HOXD9       | homeobox D9                                                                          |
| 3236 HOXD10      | homeobox D10                                                                         |
| 3275 PRMT2       | protein arginine methyltransferase 2                                                 |
| 338440 ANO9      | anoctamin 9                                                                          |
| 339324 ZNF260    | zinc finger protein 260                                                              |
| 339488 TFAP2E    | transcription factor AP-2 epsilon (activating enhancer binding protein 2 epsilon)    |
| 339665 SLC35E4   | solute carrier family 35, member E4                                                  |
| 340348 TSPAN33   | tetraspanin 33                                                                       |
| 341 APOC1        | apolipoprotein C-1                                                                   |
| 341405 ANKRD33   | ankyrin repeat domain 33                                                             |
| 342667 STAC2     | SH3 and cysteine rich domain 2                                                       |
| 342865 VSTM2B    | V-set and transmembrane domain containing 2B                                         |
| 346 APOC4        | apolipoprotein C-IV                                                                  |
| 347730 LRRTM1    | leucine rich repeat transmembrane neuronal 1                                         |
| 347731 LRRTM3    | leucine rich repeat transmembrane neuronal 3                                         |
| 3608 ILF2        | interleukin enhancer binding factor 2, 45kDa                                         |
| 3609 ILF3        | interleukin enhancer binding factor 3, 90kDa                                         |
| 375248 ANKRD36   | ankyrin repeat domain 36                                                             |
| 375775 PNPLA7    | patatin-like phospholipase domain containing 7                                       |
| 379 ARL4D        | ADP-ribosylation factor-like 4D                                                      |
| 3800 KIF5C       | kinesin family member 5C                                                             |
| 3858 KRT10       | keratin 10                                                                           |
| 387338 NSUN4     | NOP2/Sun domain family, member 4                                                     |
| 388595 TMEM82    | transmembrane protein 82                                                             |
| 388789 LINC00493 | long intergenic non-protein coding RNA 493                                           |
| 389118 CDHR4     | cadherin-related family member 4                                                     |
| 389792 IER5L     | immediate early response 5-like                                                      |
| 390 RND3         | Rho family GTPase 3                                                                  |
| 3902 LAG3        | lymphocyte-activation gene 3                                                         |
| 3927 LASP1       | LIM and SH3 protein 1                                                                |
| 3975 LHX1        | LIM homeobox 1                                                                       |
| 400 ARL1         | ADP-ribosylation factor-like 1                                                       |
| 401397 LOC401397 | uncharacterized LOC401397                                                            |
| 404093 CUEDC1    | CUE domain containing 1                                                              |
| 4045 LSAMP       | limbic system-associated membrane protein                                            |
| 4076 CAPRN1      | cell cycle associated protein 1                                                      |
| 4114 MAGEB3      | melanoma antigen family B, 3                                                         |
| 4162 MCAM        | melanoma cell adhesion molecule                                                      |
| 4212 MEIS2       | Meis homeobox 2                                                                      |
| 4234 METTL1      | methyltransferase like 1                                                             |
| 4241 MF12        | antigen p97 (melanoma associated) identified by monoclonal antibodies 133.2 and 96.5 |
| 4340 MOG         | myelin oligodendrocyte glycoprotein                                                  |
| 440590 ZYG11A    | zyg-11 homolog A (C. elegans)                                                        |
| 442425 FOXB2     | forkhead box B2                                                                      |
| 4440 MS1L        | musashi homolog 1 (Drosophila)                                                       |
| 4487 MSX1        | msh homeobox 1                                                                       |
| 4489 MT1A        | metallothionein 1A                                                                   |
| 4542 MYO1F       | myosin 1F                                                                            |
| 4601 MX1         | MAX interactor 1                                                                     |
| 4613 MYCN        | v-myc myelocytomatosis viral related oncogene, neuroblastoma derived (avian)         |
| 4641 MYO1C       | myosin 1C                                                                            |
| 4665 NAB2        | NGF-A binding protein 2 (EGR1 binding protein 2)                                     |
| 4681 NBL1        | neuroblastoma, suppression of tumorigenicity 1                                       |
| 4739 NEDD9       | neuronal precursor cell expressed, developmentally down-regulated 9                  |
| 475 ATOX1        | ATX1 antioxidant protein 1 homolog (yeast)                                           |
| 4784 NFIX        | nuclear factor 1/X (CCAAT-binding transcription factor)                              |
| 4815 NINJ2       | ninjurin 2                                                                           |
| 4857 NOVA1       | neuro-oncological ventral antigen 1                                                  |
| 4867 NPHP1       | nephronophthisis 1 (juvenile)                                                        |
| 4883 NPK3        | natriuretic peptide receptor C/guanylate cyclase C (atriuretic peptide receptor C)   |
| 4900 NRGN        | neurogranin (protein kinase C substrate, RC3)                                        |
| 493911 PHOSPHO2  | phosphatase, orphan 2                                                                |
| 5015 OTX2        | orthodenticle homeobox 2                                                             |
| 50626 CYHR1      | cysteine/histidine-rich 1                                                            |

|                  |                                                                                              |
|------------------|----------------------------------------------------------------------------------------------|
| 5064 PALM        | paralemin                                                                                    |
| 5081 PAX7        | paired box 7                                                                                 |
| 50810 HDGFRP3    | hepatoma-derived growth factor, related protein 3                                            |
| 5090 PBX3        | pre-B-cell leukemia homeobox 3                                                               |
| 50999 TMED5      | transmembrane emp24 protein transport domain containing 5                                    |
| 51019 CCDCS3     | coiled-coil domain containing 53                                                             |
| 51024 FIS1       | fission 1 (mitochondrial outer membrane) homolog (S. cerevisiae)                             |
| 51087 YBX2       | Y box binding protein 2                                                                      |
| 5110 PCMT1       | protein-L-isoaspartate (D-aspartate) O-methyltransferase                                     |
| 51192 CKLF       | chemokine-like factor                                                                        |
| 51258 MRPL51     | mitochondrial ribosomal protein L51                                                          |
| 51264 MRPL27     | mitochondrial ribosomal protein L27                                                          |
| 51278 IERS       | immediate early response 5                                                                   |
| 5128 CDK17       | cyclin-dependent kinase 17                                                                   |
| 51290 ERGIC2     | ERGIC and golgi 2                                                                            |
| 51299 NRN1       | neuritin 1                                                                                   |
| 51310 SLC22A17   | solute carrier family 22, member 17                                                          |
| 51317 PHF21A     | PHD finger protein 21A                                                                       |
| 51364 ZMYND10    | zinc finger, MYND-type containing 10                                                         |
| 51365 PLA1A      | phospholipase A1 member A                                                                    |
| 51367 POPS       | processing of precursor 5, ribonuclease P/MRP subunit (S. cerevisiae)                        |
| 51530 ZC3HC1     | zinc finger, C3HC-type containing 1                                                          |
| 51559 NT5DC1     | 5'-nucleotidase domain containing 3                                                          |
| 51596 CUTA       | cutA divalent cation tolerance homolog (E. coli)                                             |
| 51629 SLC25A39   | solute carrier family 25, member 39                                                          |
| 51631 LUC7L2     | LUC7-like 2 (S. cerevisiae)                                                                  |
| 51649 MRPS23     | mitochondrial ribosomal protein S23                                                          |
| 51650 MRPS33     | mitochondrial ribosomal protein S33                                                          |
| 51663 ZFR        | zinc finger RNA binding protein                                                              |
| 51667 NUB1       | negative regulator of ubiquitin-like proteins 1                                              |
| 51751 HIGD1B     | HIG1 hypoxia inducible domain family, member 1B                                              |
| 51759 C9orf78    | chromosome 9 open reading frame 78                                                           |
| 51762 RAB8B      | RAB8B, member RAS oncogene family                                                            |
| 51768 TM7SF3     | transmembrane 7 superfamily member 3                                                         |
| 51804 SIX4       | SIX homeobox 4                                                                               |
| 51805 COQ3       | coenzyme Q3 homolog, methyltransferase (S. cerevisiae)                                       |
| 5309 PITX3       | paired-like homeodomain 3                                                                    |
| 5326 PLAGL2      | pleiomorphic adenoma gene-like 2                                                             |
| 53335 BCL11A     | B-cell CLL/lymphoma 11A (zinc finger protein)                                                |
| 53353 LRP1B      | low density lipoprotein receptor-related protein 1B                                          |
| 5359 PLSCR1      | phospholipid scramblase 1                                                                    |
| 54014 BRWD1      | bromodomain and WD repeat domain containing 1                                                |
| 54020 SLC37A1    | solute carrier family 37 (glycerol-3-phosphate transporter), member 1                        |
| 5428 POLG        | polymerase (DNA directed), gamma                                                             |
| 5447 POR         | P450 (cytochrome) oxidoreductase                                                             |
| 54475 NLE1       | notchless homolog 1 (Drosophila)                                                             |
| 54477 PLEKHA5    | pleckstrin homology domain containing, family A member 5                                     |
| 54542 RC3H2      | ring finger and CCCH-type domains 2                                                          |
| 5459 POU4F3      | POU class 4 homeobox 3                                                                       |
| 54726 OTUD4      | OTU domain containing 4                                                                      |
| 54765 TRIM44     | tripartite motif containing 44                                                               |
| 54766 BTG4       | B-cell translocation gene 4                                                                  |
| 54796 BNC2       | basonuclin 2                                                                                 |
| 54806 AH11       | Abelson helper integration site 1                                                            |
| 54810 GIPC2      | GIPC PDZ domain containing family, member 2                                                  |
| 54812 AFTPH      | aftiphilin                                                                                   |
| 54822 TRPM7      | transient receptor potential cation channel, subfamily M, member 7                           |
| 54828 BCAS3      | breast carcinoma amplified sequence 3                                                        |
| 54845 ESRP1      | epithelial splicing regulatory protein 1                                                     |
| 54847 SIDT1      | SID1 transmembrane family, member 1                                                          |
| 54866 PPP1R14D   | protein phosphatase 1, regulatory (inhibitor) subunit 14D                                    |
| 54915 YTHDF1     | YTH domain family, member 1                                                                  |
| 54927 CHCHD3     | coiled-coil-helix-coiled-coil-helix domain containing 3                                      |
| 54929 TMEM161A   | transmembrane protein 161A                                                                   |
| 54972 TMEM132A   | transmembrane protein 132A                                                                   |
| 54987 C1orf123   | chromosome 1 open reading frame 123                                                          |
| 550 AUP1         | ancient ubiquitous protein 1                                                                 |
| 55012 PPP2R3C    | protein phosphatase 2, regulatory subunit B'', gamma                                         |
| 55023 PHIP       | pleckstrin homology domain interacting protein                                               |
| 55032 SLC35A5    | solute carrier family 35, member A5                                                          |
| 55080 TAPBP1     | TAP binding protein-like                                                                     |
| 55103 RALGPS2    | Ral GEF with PH domain and SH3 binding motif 2                                               |
| 5511 PPP1R8      | protein phosphatase 1, regulatory subunit 8                                                  |
| 55137 FIGN       | figgetin                                                                                     |
| 55161 TMEM33     | transmembrane protein 33                                                                     |
| 55165 CEP55      | centrosomal protein 55kDa                                                                    |
| 55170 PRMT6      | protein arginine methyltransferase 6                                                         |
| 55186 SLC25A36   | solute carrier family 25, member 36                                                          |
| 55196 C12orf35   | chromosome 12 open reading frame 35                                                          |
| 55204 GOLPH3L    | golgi phosphoprotein 3-like                                                                  |
| 55207 ARL8B      | ADP-ribosylation factor-like 8B                                                              |
| 55222 LRRC20     | leucine rich repeat containing 20                                                            |
| 55269 PSPC1      | paraspeckle component 1                                                                      |
| 55283 MCOLN3     | mucoilin 3                                                                                   |
| 55290 BOLA2      | bolA homolog 2 (E. coli)                                                                     |
| 55297 CDC91      | coiled-coil domain containing 91                                                             |
| 55298 RNF121     | ring finger protein 121                                                                      |
| 55324 ABCF3      | ATP-binding cassette, sub-family F (GNC20), member 3                                         |
| 55333 SYNJ2BP    | synaptojanin 2 binding protein                                                               |
| 55339 WDR33      | WD repeat domain 33                                                                          |
| 55342 STRBP      | spermatid perinuclear RNA binding protein                                                    |
| 55379 LRRC59     | leucine rich repeat containing 59                                                            |
| 55450 CAMK2N1    | calcium/calmodulin-dependent protein kinase II inhibitor 1                                   |
| 5550 PREP        | prolyl endopeptidase                                                                         |
| 55529 TMEM55A    | transmembrane protein 55A                                                                    |
| 55643 BTBD2      | BTB (POZ) domain containing 2                                                                |
| 55652 SLC48A1    | solute carrier family 48 (heme transporter), member 1                                        |
| 55704 CDC88A     | coiled-coil domain containing 88A                                                            |
| 55737 VPS35      | vacuolar protein sorting 35 homolog (S. cerevisiae)                                          |
| 55764 IFT122     | intraflagellar transport 122 homolog (Chlamydomonas)                                         |
| 55823 VPS11      | vacuolar protein sorting 11 homolog (S. cerevisiae)                                          |
| 55832 CAND1      | culin-associated and neddylation-dissociated 1                                               |
| 55840 EAF2       | ELL associated factor 2                                                                      |
| 55890 GPRC5C     | G protein-coupled receptor, family C, group 5, member C                                      |
| 55892 MYNN       | myoneurin                                                                                    |
| 55893 ZNF395     | zinc finger protein 395                                                                      |
| 55915 LANCL2     | LanC lantibiotic synthetase component C-like 2 (bacterial)                                   |
| 55954 ZMAT5      | zinc finger, matrix-type 5                                                                   |
| 56033 BARX1      | BARX homeobox 1                                                                              |
| 56155 TEX14      | testis expressed 14                                                                          |
| 56204 KIAA1370   | KIAA1370                                                                                     |
| 56245 C21orf62   | chromosome 21 open reading frame 62                                                          |
| 56254 RNF20      | ring finger protein 20                                                                       |
| 5639 PRRG2       | proline rich Gla (G-carboxyglutamic acid) 2                                                  |
| 56681 SAR1A      | SAR1 homolog A (S. cerevisiae)                                                               |
| 56683 C21orf59   | chromosome 21 open reading frame 59                                                          |
| 56889 TM9SF3     | transmembrane 9 superfamily member 3                                                         |
| 56927 GPR108     | G protein-coupled receptor 108                                                               |
| 56943 ENY2       | enhancer of yellow 2 homolog (Drosophila)                                                    |
| 56944 OLFML3     | olfactomedin-like 3                                                                          |
| 56957 OTUD7B     | OTU domain containing 7B                                                                     |
| 56961 SHD        | Src homology 2 domain containing transforming protein D                                      |
| 56987 BBX        | bobby sox homolog (Drosophila)                                                               |
| 57010 CABP4      | calcium binding protein 4                                                                    |
| 57057 TBX20      | T-box 20                                                                                     |
| 57092 PCNP       | PEST proteolytic signal containing nuclear protein                                           |
| 57198 ATP8B2     | ATPase, class I, type 8B, member 2                                                           |
| 57226 LYRM2      | LYR motif containing 2                                                                       |
| 57326 PBXIP1     | pre-B-cell leukemia homeobox interacting protein 1                                           |
| 57451 ODZ2       | odz, odd Oz/ten-m homolog 2 (Drosophila)                                                     |
| 57537 SORCS2     | sortilin-related VPS10 domain containing receptor 2                                          |
| 57561 ARRD3C3    | arrestin domain containing 3                                                                 |
| 57575 PCDH10     | protocadherin 10                                                                             |
| 57576 KIF17      | kinesin family member 17                                                                     |
| 57617 VPS18      | vacuolar protein sorting 18 homolog (S. cerevisiae)                                          |
| 5763 PTMS        | parathyrosin                                                                                 |
| 57633 LRRN1      | leucine rich repeat neuronal 1                                                               |
| 57664 PLEKHA4    | pleckstrin homology domain containing, family A (phosphoinositide binding specific) member 4 |
| 577 BAI3         | brain-specific angiogenesis inhibitor 3                                                      |
| 57713 SFBMT2     | Scm-like with four mbt domains 2                                                             |
| 57716 PRX        | periaxin                                                                                     |
| 5780 PTPN9       | protein tyrosine phosphatase, non-receptor type 9                                            |
| 5782 PTPN12      | protein tyrosine phosphatase, non-receptor type 12                                           |
| 57822 GRHL3      | grainyhead-like 3 (Drosophila)                                                               |
| 5790 PTPRCAP     | protein tyrosine phosphatase, receptor type, C-associated protein                            |
| 5813 PURA        | purine-rich element binding protein A                                                        |
| 58499 ZNF462     | zinc finger protein 462                                                                      |
| 5866 RAB31L1     | RAB3A interacting protein (rabin3)-like 1                                                    |
| 59274 MESDC1     | mesoderm development candidate 1                                                             |
| 5939 RBMS2       | RNA binding motif, single stranded interacting protein 2                                     |
| 5991 RFX3        | regulatory factor X, 3 (influences HLA class II expression)                                  |
| 6001 RGS10       | regulator of G-protein signaling 10                                                          |
| 6004 RGS16       | regulator of G-protein signaling 16                                                          |
| 6007 RHD         | Rh blood group, D antigen                                                                    |
| 6017 RLBP1       | retinaldehyde binding protein 1                                                              |
| 60509 AGBL5      | ATP/GTP binding protein-like 5                                                               |
| 60675 PROK2      | prokineticin 2                                                                               |
| 60681 FKBP10     | FK506 binding protein 10, 65 kDa                                                             |
| 6253 RTN2        | reticulon 2                                                                                  |
| 6297 SALL2       | sal-like 2 (Drosophila)                                                                      |
| 6299 SALL1       | sal-like 1 (Drosophila)                                                                      |
| 6302 TSPAN31     | tetraspanin 31                                                                               |
| 63876 PKNX2      | PBX/knotted 1 homeobox 2                                                                     |
| 63905 MANBAL     | mannosidase, beta A, lysosomal-like                                                          |
| 63924 CIDECD     | cell death-inducing DFFA-like effector c                                                     |
| 63973 NEUROG2    | neurogenin 2                                                                                 |
| 64067 NPAS3      | neuronal PAS domain protein 3                                                                |
| 64083 GOLPH3     | golgi phosphoprotein 3 (coat-protein)                                                        |
| 64097 EPB41L4A   | erythrocyte membrane protein band 4.1 like 4A                                                |
| 6415 SEPW1       | selenoprotein W, 1                                                                           |
| 64211 LHXS       | LIM homeobox 5                                                                               |
| 64220 STRA6      | stimulated by retinoic acid gene 6 homolog (mouse)                                           |
| 64359 NXN        | nucleoredoxin                                                                                |
| 64375 IKZF4      | IKAROS family zinc finger 4 (Eos)                                                            |
| 64405 CDH22      | cadherin 22, type 2                                                                          |
| 64410 KLHL25     | kelch-like 25 (Drosophila)                                                                   |
| 645638 LOC645638 | WDNM1-like pseudogene                                                                        |

|                  |                                                                                                 |
|------------------|-------------------------------------------------------------------------------------------------|
| 64641 EBF2       | early B cell factor 2                                                                           |
| 647024 C6orf132  | chromosome 6 open reading frame 132                                                             |
| 64748 LPFR2      | lipid phosphate phosphatase-related protein type 2                                              |
| 64852 TUT1       | terminal uridylyl transferase 1, U6 snRNA-specific                                              |
| 64901 RANBP17    | RAN binding protein 17                                                                          |
| 6495 SIX1        | SIX homeobox 1                                                                                  |
| 6496 SIX3        | SIX homeobox 3                                                                                  |
| 64981 MRPL34     | mitochondrial ribosomal protein L34                                                             |
| 65009 NDRG4      | NDRG family member 4                                                                            |
| 65083 NOL6       | nucleolar protein family 6 (RNA-associated)                                                     |
| 65117 RSRG2      | arginine/serine-rich coiled-coil 2                                                              |
| 65125 WNK1       | WNK lysine deficient protein kinase 1                                                           |
| 65266 WNK4       | WNK lysine deficient protein kinase 4                                                           |
| 653677 SEC1      | secretory blood group 1                                                                         |
| 654790 PCP4L1    | Purkinje cell protein 4 like 1                                                                  |
| 66005 CHID1      | chitinase domain containing 1                                                                   |
| 6612 SUMO3       | SMT3 suppressor of mif two 3 homolog 3 (S. cerevisiae)                                          |
| 6641 SNB1        | syntrophin, beta 1 (dystrophin-associated protein A1, 59kDa, basic component 1)                 |
| 6651 SON         | SON DNA binding protein                                                                         |
| 6659 SOX4        | SRY (sex determining region Y)-box 4                                                            |
| 6692 SPINT1      | serine peptidase inhibitor, Kunitz type 1                                                       |
| 676 BRDT         | bromodomain, testis-specific                                                                    |
| 6780 STAU1       | staufen, RNA binding protein, homolog 1 (Drosophila)                                            |
| 687 KLF9         | Kruppel-like factor 9                                                                           |
| 6886 TALL1       | T-cell acute lymphocytic leukemia 1                                                             |
| 6913 TBX15       | T-box 15                                                                                        |
| 6926 TBX3        | T-box 3                                                                                         |
| 6939 TCF15       | transcription factor 15 (basic helix-loop-helix)                                                |
| 6942 TCF20       | transcription factor 20 (AR1)                                                                   |
| 6944 VPS72       | vacuolar protein sorting 72 homolog (S. cerevisiae)                                             |
| 6954 TCP11       | t-complex 11 homolog (mouse)                                                                    |
| 696 BTN1A1       | butyrophilin, subfamily 1, member A1                                                            |
| 705 BSL          | bystin-like                                                                                     |
| 7072 TIA1        | TIA1 cytotoxic granule-associated RNA binding protein                                           |
| 7073 TIAL1       | TIA1 cytotoxic granule-associated RNA binding protein-like 1                                    |
| 7087 ICAM5       | intercellular adhesion molecule 5, telencephalin                                                |
| 7265 TTC1        | tetratricopeptide repeat domain 1                                                               |
| 7270 TTF1        | transcription termination factor, RNA polymerase I                                              |
| 7288 TULP2       | tubby like protein 2                                                                            |
| 7289 TULP3       | tubby like protein 3                                                                            |
| 728927 ZNF736    | zinc finger protein 736                                                                         |
| 7290 HIRA        | HIR histone cell cycle regulation defective homolog A (S. cerevisiae)                           |
| 7415 VCP         | valosin containing protein                                                                      |
| 744 MPPE2        | metallophosphoesterase domain containing 2                                                      |
| 7441 VPBEB1      | pre-B lymphocyte 1                                                                              |
| 754 PTTG1P       | pituitary tumor-transforming 1 interacting protein                                              |
| 7545 ZIC1        | Zic family member 1                                                                             |
| 7701 ZNF142      | zinc finger protein 142                                                                         |
| 7703 PCGF2       | polycomb group ring finger 2                                                                    |
| 7707 ZNF148      | zinc finger protein 148                                                                         |
| 7726 TRIM26      | tripartite motif containing 26                                                                  |
| 780 DDR1         | discoidin domain receptor tyrosine kinase 1                                                     |
| 7866 IFRD2       | interferon-related developmental regulator 2                                                    |
| 7897 GDAP1L1     | ganglioside-induced differentiation-associated protein 1-like 1                                 |
| 79004 CUEDC2     | CUE domain containing 2                                                                         |
| 79007 DBNDD1     | dysbindin (dystrobrevin binding protein 1) domain containing 1                                  |
| 79026 AHNAC      | AHNAC nucleoprotein                                                                             |
| 79070 KDELC1     | KDEL (Lys-Asp-Glu-Leu) containing 1                                                             |
| 79073 TMEM109    | transmembrane protein 109                                                                       |
| 79152 FA2H       | fatty acid 2-hydroxylase                                                                        |
| 79153 GDPD3      | glycerophosphodiester phosphodiesterase domain containing 3                                     |
| 79157 MFSO11     | major facilitator superfamily domain containing 11                                              |
| 79176 FBXL15     | F-box and leucine-rich repeat protein 15                                                        |
| 79411 GLB1L      | galactosidase, beta 1-like                                                                      |
| 79577 CDC73      | cell division cycle 73, Paf1/RNA polymerase II complex component, homolog (S. cerevisiae)       |
| 79630 C1orf54    | chromosome 1 open reading frame 54                                                              |
| 79734 KCTD17     | potassium channel tetramerisation domain containing 17                                          |
| 79776 ZFXH4      | zinc finger homeobox 4                                                                          |
| 79789 CLMN       | calmin (calponin-like, transmembrane)                                                           |
| 79848 CSPP1      | centrosome and spindle pole associated protein 1                                                |
| 79877 DCAKD      | dephospho-CoA kinase domain containing                                                          |
| 79893 GGNBP2     | gametogenin binding protein 2                                                                   |
| 79932 KIAA0319L  | KIAA0319-like                                                                                   |
| 79971 WLS        | wntless homolog (Drosophila)                                                                    |
| 79977 GRHL2      | grainyhead-like 2 (Drosophila)                                                                  |
| 80019 UBTD1      | ubiquitin domain containing 1                                                                   |
| 80022 MYO15B     | myosin XVb pseudogene                                                                           |
| 80131 LRRC8E     | leucine rich repeat containing 8 family, member E                                               |
| 80167 C4orf29    | chromosome 4 open reading frame 29                                                              |
| 80173 IFT4       | intraflagellar transport 74 homolog (Chlamydomonas)                                             |
| 80279 CDKSRAP3   | CDK5 regulatory subunit associated protein 3                                                    |
| 8028 MLLT10      | myeloid/lymphoid or mixed-lineage leukemia (trithorax homolog, Drosophila); translocated to, 10 |
| 80315 CPEB4      | cytoplasmic polyadenylation element binding protein 4                                           |
| 80318 GKAP1      | G kinase anchoring protein 1                                                                    |
| 80320 SP6        | Sp6 transcription factor                                                                        |
| 80351 TNKS2      | tankyrase, TRF1-interacting ankyrin-related ADP-ribose polymerase 2                             |
| 8036 SHOC2       | soc-2 suppressor of clear homolog (C. elegans)                                                  |
| 80709 AKNA       | AT-hook transcription factor                                                                    |
| 8079 MLF2        | myeloid leukemia factor 2                                                                       |
| 8091 HMGAA2      | high mobility group AT-hook 2                                                                   |
| 80975 TMPRSS5    | transmembrane protease, serine 5                                                                |
| 8110 DPF3        | D4, zinc and double PHD fingers, family 3                                                       |
| 81544 GDPD5      | glycerophosphodiester phosphodiesterase domain containing 5                                     |
| 81572 PDRG1      | p53 and DNA-damage regulated 1                                                                  |
| 81602 CDADC1     | cytidine and dCMP deaminase domain containing 1                                                 |
| 81603 TRIM8      | tripartite motif containing 8                                                                   |
| 81605 URM1       | ubiquitin related modifier 1                                                                    |
| 81611 ANP32E     | acidic (leucine-rich) nuclear phosphoprotein 32 family, member E                                |
| 81618 ITM2C      | integral membrane protein 2C                                                                    |
| 81629 TSK3       | testis-specific serine kinase 3                                                                 |
| 81786 TRIM7      | tripartite motif containing 7                                                                   |
| 81796 SLC05A1    | solute carrier organic anion transporter family, member 5A1                                     |
| 81846 SBF2       | SET binding factor 2                                                                            |
| 81889 FAHD1      | fumarylacetoacetate hydrolase domain containing 1                                               |
| 8225 GTPBP6      | GTP binding protein 6 (putative)                                                                |
| 825 CAPN3        | calpain 3, (p94)                                                                                |
| 8289 ARID1A      | AT rich interactive domain 1A (SWI-like)                                                        |
| 8315 BRAP        | BRCA1 associated protein                                                                        |
| 83440 ADPGK      | ADP-dependent glucokinase                                                                       |
| 83461 CDCA3      | cell division cycle associated 3                                                                |
| 83546 RTBDN      | retbindin                                                                                       |
| 83591 THAP2      | THAP domain containing, apoptosis associated protein 2                                          |
| 83597 RTP3       | receptor (chemosensory) transporter protein 3                                                   |
| 83694 RPS6KL1    | ribosomal protein S6 kinase-like 1                                                              |
| 83698 CALN1      | calneuron 1                                                                                     |
| 83715 ESPN       | espin                                                                                           |
| 83742 MARVELD1   | MARVEL domain containing 1                                                                      |
| 83759 RBM4B      | RNA binding motif protein 4B                                                                    |
| 83871 RAB34      | RAB34, member RAS oncogene family                                                               |
| 83931 STK40      | serine/threonine kinase 40                                                                      |
| 84072 HORMAD1    | HORMA domain containing 1                                                                       |
| 84073 MYCBPAP    | MYCBP associated protein                                                                        |
| 84107 ZIC4       | Zic family member 4                                                                             |
| 84108 PCGF6      | polycomb group ring finger 6                                                                    |
| 84159 ARID5B     | AT rich interactive domain 5B (MRF1-like)                                                       |
| 84163 GTF2IRD2   | GTF2I repeat domain containing 2                                                                |
| 84196 USP48      | ubiquitin specific peptidase 48                                                                 |
| 84251 SGP1       | SH3-domain GRB2-like (endophilin) interacting protein 1                                         |
| 84258 SYT3       | synaptotagmin III                                                                               |
| 84274 COQ5       | coenzyme Q5 homolog, methyltransferase (S. cerevisiae)                                          |
| 84288 EFCAB2     | EF-hand calcium binding domain 2                                                                |
| 84311 MRPL45     | mitochondrial ribosomal protein L45                                                             |
| 8444 DYRK3       | dual-specificity tyrosine-(Y)-phosphorylation regulated kinase 3                                |
| 84561 SLC12A8    | solute carrier family 12 (potassium/chloride transporters), member 8                            |
| 8459 TPST2       | tyrosylprotein sulfotransferase 2                                                               |
| 84662 GLIS2      | GLIS family zinc finger 2                                                                       |
| 84667 HES7       | hairly and enhancer of split 7 (Drosophila)                                                     |
| 84750 FUT10      | fucosyltransferase 10 (alpha (1,3) fucosyltransferase)                                          |
| 84759 PCGF1      | polycomb group ring finger 1                                                                    |
| 84814 PPAPDC3    | phosphatidic acid phosphatase type 2 domain containing 3                                        |
| 84836 ABHD14B    | abhydrolase domain containing 14B                                                               |
| 84858 ZNF503     | zinc finger protein 503                                                                         |
| 84930 MASTL      | microtubule associated serine/threonine kinase-like                                             |
| 84932 RAB28      | RAB28, member RAS oncogene family                                                               |
| 84937 ZNRF1      | zinc and ring finger 1                                                                          |
| 84955 NUDCD1     | NudC domain containing 1                                                                        |
| 85004 RERG       | RAS-like, estrogen-regulated, growth inhibitor                                                  |
| 85014 TMEM141    | transmembrane protein 141                                                                       |
| 85364 ZCHC3      | zinc finger, CCH domain containing 3                                                            |
| 85416 ZICS       | Zic family member 5                                                                             |
| 85451 UNK        | unkempt homolog (Drosophila)                                                                    |
| 85461 TANC1      | tetratricopeptide repeat, ankyrin repeat and coiled-coil containing 1                           |
| 85474 LBX2       | ladybird homeobox 2                                                                             |
| 8549 LGR5        | leucine-rich repeat containing G protein-coupled receptor 5                                     |
| 8609 KLF7        | Kruppel-like factor 7 (ubiquitous)                                                              |
| 8614 STC2        | stanniocalcin 2                                                                                 |
| 8880 FUBP1       | far upstream element (FUSE) binding protein 1                                                   |
| 8899 PRPF4B      | PRP4 pre-mRNA processing factor 4 homolog B (yeast)                                             |
| 8975 USP13       | ubiquitin specific peptidase 13 (isopeptidase T-3)                                              |
| 89765 RSPH1      | radial spoke head 1 homolog (Chlamydomonas)                                                     |
| 89866 SEC16B     | SEC16 homolog B (S. cerevisiae)                                                                 |
| 8994 LIMD1       | LIM domains containing 1                                                                        |
| 8999 CDKL2       | cyclin-dependent kinase-like 2 (CDC2-related kinase)                                            |
| 90007 MIDN       | midnolin                                                                                        |
| 90102 PHLDB2     | pleckstrin homology-like domain, family B, member 2                                             |
| 9031 BAZ1B       | bromodomain adjacent to zinc finger domain, 1B                                                  |
| 9032 TM4SF5      | transmembrane 4 L six family member 5                                                           |
| 90324 CCD97      | coiled-coil domain containing 97                                                                |
| 90480 GADD45GIP1 | growth arrest and DNA-damage-inducible, gamma interacting protein 1                             |
| 9049 AIP         | aryl hydrocarbon receptor interacting protein                                                   |
| 9050 PSTPIP2     | proline-serine-threonine phosphatase interacting protein 2                                      |
| 90506 LRRRC46    | leucine rich repeat containing 46                                                               |
| 90507 SCRN2      | secernin 2                                                                                      |
| 9066 SYT7        | synaptotagmin VII                                                                               |
| 90843 TCEAL8     | transcription elongation factor A (SII)-like 8                                                  |
| 9096 TBX18       | T-box 18                                                                                        |
| 90990 KIFC2      | kinesin family member C2                                                                        |

|       |          |                                                                 |
|-------|----------|-----------------------------------------------------------------|
| 9124  | PDLIM1   | PDZ and LIM domain 1                                            |
| 9143  | SYNGR3   | synaptogyrin 3                                                  |
| 91683 | SVT12    | synaptotagmin XII                                               |
| 91754 | NEK9     | NIMA (never in mitosis gene a)-related kinase 9                 |
| 9201  | DCLK1    | doublecortin-like kinase 1                                      |
| 92305 | TMEM129  | transmembrane protein 129                                       |
| 9238  | TBRG4    | transforming growth factor beta regulator 4                     |
| 9275  | BCL7B    | B-cell CLL/lymphoma 7B                                          |
| 92797 | HELB     | helicase (DNA) B                                                |
| 93145 | OLFM2    | olfactomedin 2                                                  |
| 9325  | TRIP4    | thyroid hormone receptor interactor 4                           |
| 93436 | ARMCG6   | armadillo repeat containing 6                                   |
| 9352  | TXNL1    | thioredoxin-like 1                                              |
| 9355  | LHX2     | LIM homeobox 2                                                  |
| 9364  | RAB28    | RAB28, member RAS oncogene family                               |
| 93664 | CADPS2   | Ca <sup>+++</sup> -dependent secretion activator 2              |
| 9373  | PLAA     | phospholipase A2-activating protein                             |
| 93974 | ATPIF1   | ATPase inhibitory factor 1                                      |
| 94015 | TTYH2    | tweety homolog 2 (Drosophila)                                   |
| 94032 | CAMK2N2  | calcium/calmodulin-dependent protein kinase II inhibitor 2      |
| 9404  | LPXN     | leupaxin                                                        |
| 9462  | RASAL2   | RAS protein activator like 2                                    |
| 9513  | FXR2     | fragile X mental retardation, autosomal homolog 2               |
| 9545  | RAB3D    | RAB3D, member RAS oncogene family                               |
| 9552  | SPAG7    | sperm associated antigen 7                                      |
| 9590  | AKAP12   | A kinase (PRKA) anchor protein 12                               |
| 9625  | AATK     | apoptosis-associated tyrosine kinase                            |
| 9644  | SH3PXD2A | SH3 and PX domains 2A                                           |
| 9657  | IQCB1    | IQ motif containing B1                                          |
| 9659  | PDE4DIP  | phosphodiesterase 4D interacting protein                        |
| 9686  | VGLL4    | vestigial like 4 (Drosophila)                                   |
| 9699  | RIMS2    | regulating synaptic membrane exocytosis 2                       |
| 9718  | ECE2     | endothelin converting enzyme 2                                  |
| 9746  | CLSTN3   | calsyntenin 3                                                   |
| 9753  | ZSCAN12  | zinc finger and SCAN domain containing 12                       |
| 9768  | KIAA0101 | KIAA0101                                                        |
| 9807  | IP6K1    | inositol hexakisphosphate kinase 1                              |
| 9853  | RUSC2    | RUN and SH3 domain containing 2                                 |
| 9859  | CEP170   | centrosomal protein 170kDa                                      |
| 987   | LRBA     | LPS-responsive vesicle trafficking, beach and anchor containing |
| 9898  | UBAP2L   | ubiquitin associated protein 2-like                             |
| 9909  | DENND4B  | DENN/MADD domain containing 4B                                  |
| 9910  | RABGAP1L | RAB GTPase activating protein 1-like                            |
| 9921  | RNF10    | ring finger protein 10                                          |
| 9946  | CRYZL1   | crystallin, zeta (quinone reductase)-like 1                     |
